# Supplementary material for: Disentangling metabolic functions of bacteria in the honey bee gut
Source: PLoS Biol. 2017 Dec 12;15(12):e2003467. doi: 10.1371/journal.pbio.2003467 (PMC5726620; doi:10.1371/journal.pbio.2003467)
Supplement: S2 Data — (XLSX) [file pbio.2003467.s002.xlsx]

## Sheet: S2A Data all ions
Annotations															Exp1 experiment MD-CL		Exp2 experiment MD-CL		Both experiments pooled MD-CL		MD-Hive (Exp 2)		ANOVA results	Bartonella apis		Bifidobacterium asteroides		Reconstituted microbiota (CL)		Firm-4		Firm-5		Frischella perrara		Giliamella apicola		Hive		Snodgrassella alvi		Pollen-Water (plotted in S6A Fig)
ion_ID	ion_m/z	ion_average_intensity	Robust_MD-CL_change	Substrate/product	Most_discriminatory_ions	MD-Hive_change_pval<0.01	Top_KEGG_annotation	Top_KEGG_compound	Pollen ions	Modified annotation	compound_class	#_of_annotations	All_KEGG_annotations	Top_annotation_formula	Exp1_log2_fold_change	Exp1_p-value	Exp2_log2_fold_change	Exp2_p-value	Pooled_log2_fold_change	Pooled_p-value	MD-hive_log2_fold_change	MD-hive_p-value	Significant_treatment_groups_vs_MD	Ba_ΔZ-Score	Ba_p_value	Bi_ΔZ-Score	Bi_p_value	CL_ΔZ-Score	CL_p_value	F4_ΔZ-Score	F4_p_value	F5_ΔZ-Score	F5_p_value	Fp_ΔZ-Score	Fp_p_value	Ga_ΔZ-Score	Ga_p_value	Hive_ΔZ-Score	Hive_p_value	Sa_ΔZ-Score	Sa_p_value	pollen_log2	pollen_pvalBH	plot_or_not
1	55.0183	4947.97	no	no	no	no	Acrolein	C01471	yes	no	-	2	C01471; C05986	C3H4O	0.645457	0.0143	0.14709	0.174336	0.324953	0.00140572	-0.473927	0.0223202	Fp;hive	-	-	-	-	-	-	-	-	-	-	-1.27236	0.00618357	-	-	-1.43851	0.0143413	-	-	3.64811	7.23137e-12	yes
2	57.0341	17110.5	no	no	no	yes	Acetone	C00207	yes	no	Carbonyl Compounds	6	C00207; C00479; C02001; C11506; C11507; C15508	C3H6O	0.0251269	0.879207	-0.224523	0.00344292	-0.135278	0.0425692	-0.337626	0.00123072	CL;hive;S	-	-	-	-	-0.820498	0.0162596	-	-	-	-	-	-	-	-	-1.18791	0.00514697	-2.42756	1.58632e-11	3.49806	3.27273e-12	yes
3	58.0055	1978.68	no	no	no	no	Potassium acetate	C12554	no	no	-	1	C12554	C2H3O2	0.239694	0.239918	-0.504978	0.0127821	-0.264208	0.1108	-0.410963	0.0344226	A1;CL;F5;Fp;G	-1.71459	0.0114245	-	-	-1.41238	0.00425452	-	-	-1.57682	0.0279519	-1.53474	0.00407895	-1.89408	0.0032468	-	-	-	-	3.66114	1.62758e-09	no
4	58.0294	2544.16	yes	substrate	no	yes	Aminoacetaldehyde	C06244	no	yes	Carboxylic Acids and Derivatives	3	C06244; C06735; C11489	C2H5NO	-0.602736	0.000254675	-0.615212	7.85041e-06	-0.607911	1.03084e-09	-1.15285	1.20885e-05	A1;CL;F4;F5;hive;S	-0.981605	0.0291937	-	-	-1.52925	5.43497e-08	1.12032	0.00673414	-1.23793	0.00172584	-	-	-	-	-2.42389	1.66622e-10	-0.894752	0.00984784	2.34423	3.29084e-07	no
5	59.0133	42664	no	no	no	no	Acetate	C00033	yes	no	Carboxylic Acids and Derivatives	2	C00033; C00266	C2H4O2	0.316996	0.0292142	0.123348	0.0488984	0.193855	0.000697387	0.102389	0.252927	Fp;G	-	-	-	-	-	-	-	-	-	-	-1.1213	0.0137038	-1.22375	0.0401981	-	-	-	-	4.09634	1.72386e-11	yes
6	59.0498	1602.56	no	no	no	no	Propan-2-ol	C01845	no	no	Alcohols and Polyols	2	C01845; C05979	C3H8O	0.201806	0.0775985	0.212512	0.105743	0.21243	0.0151474	0.251954	0.0623166		-	-	-	-	-	-	-	-	-	-	-	-	-	-	-	-	-	-	-2.00137	2.41731e-05	no
7	60.9929	3378.53	no	no	no	no	Carbonic acid	C01353	no	no	Organic Carbonic Acids and Derivatives	1	C01353	H2CO3	0.111231	0.115472	0.105897	0.224847	0.111963	0.0608237	0.0550406	0.670327		-	-	-	-	-	-	-	-	-	-	-	-	-	-	-	-	-	-	-2.68345	3.74591e-05	no
8	67.0186	9818.15	yes	substrate	yes	yes	3-Butyn-1-al	C06145	yes	no	-	2	C06145; C14275	C4H4O	-2.50013	0.000104557	-2.2193	4.85144e-06	-2.35571	2.05481e-09	-2.18495	5.47448e-06	CL;F5;Fp;hive;S	-	-	-	-	-1.73553	2.35173e-08	-	-	-1.71528	2.99009e-05	-1.60348	1.71282e-06	-	-	-1.72409	2.68631e-05	-1.39989	3.64955e-05	4.19839	2.32251e-11	yes
9	69.0342	5078.09	yes	product	no	no	3-Butyn-1-ol	C06146	yes	no	-	4	C06146; C17721; C19377; C20701	C4H6O	0.7776	0.00656174	0.618063	1.40022e-05	0.676492	2.3696e-08	0.218833	0.070132	CL;F5;G	-	-	-	-	2.09963	1.67378e-11	-	-	1.1156	0.00706741	-	-	1.45677	0.000110043	-	-	-	-	2.59827	4.4688e-11	yes
10	70.0295	2667.51	no	no	no	yes	Acrylamide	C01659	no	no	Carbonyl Compounds	1	C01659	C3H5NO	-0.203528	0.436474	-0.441621	0.105817	-0.357201	0.049886	-1.58746	0.000201124	hive	-	-	-	-	-	-	-	-	-	-	-	-	-	-	-1.65715	0.0235818	-	-	3.38824	1.41604e-07	no
11	71.0133	48154.8	no	no	no	no	Acrylic acid	C00511	yes	no	Carbonyl Compounds	5	C00511; C00546; C19246; C19297; C19440	C3H4O2	-0.201337	0.0661795	-0.612799	6.79245e-05	-0.468177	1.20521e-05	-0.4037	0.0265415	A1;B;CL;F5;Fp;G;hive;S	-2.02141	1.81643e-05	-1.9348	4.53386e-05	-2.13174	3.27006e-09	-	-	-2.30053	8.79605e-07	-1.52754	0.000105204	-2.21635	2.21528e-06	-1.5035	0.00323288	-1.42913	0.000353156	4.24215	7.85535e-12	yes
12	71.0498	1583.9	yes	product	no	no	Butanal	C01412	no	no	Carbonyl Compounds	3	C01412; C02845; C19237	C4H8O	0.542269	0.000415824	0.730079	8.62604e-06	0.66305	5.52837e-09	0.164592	0.265733	CL;F4;F5	-	-	-	-	1.32487	0.00192832	2.51473	1.50918e-06	1.55154	0.0089531	-	-	-	-	-	-	-	-	2.23132	0.000640799	no
13	72.9928	4935.13	no	no	no	yes	Glyoxylate	C00048	no	no	Carboxylic Acids and Derivatives	1	C00048	C2H2O3	0.0872676	0.430712	-0.0147843	0.839017	0.016191	0.799607	-0.404092	7.25487e-05	B;F5;hive	-	-	1.77037	0.000472806	-	-	-	-	1.33091	0.0219329	-	-	-	-	-1.43709	0.00935341	-	-	2.29372	6.56345e-16	no
14	73.029	28688.9	no	no	no	no	Propanoate	C00163	yes	no	Carboxylic Acids and Derivatives	8	C00163; C00424; C00937; C00969; C05235; C05999; C10920; C17530	C3H6O2	0.987979	0.0121995	0.675821	0.000978061	0.787539	1.36456e-05	-0.0504784	0.860792	CL;F5	-	-	-	-	1.44191	3.43712e-05	-	-	2.18067	1.43049e-06	-	-	-	-	-	-	-	-	4.05903	6.20552e-11	yes
15	74.0243	12143.3	yes	substrate	no	yes	Glycine	C00037	no	no	Amino Acids and Derivatives	4	C00037; C01837; C06808; C19445	C2H5NO2	-0.383744	0.00269422	-0.287458	0.00477935	-0.327662	1.88756e-05	-0.849596	2.17925e-06	CL;F4;hive;S	-	-	-	-	-1.0161	0.00976544	-1.32415	0.010814	-	-	-	-	-	-	-2.50325	3.74925e-08	-1.15368	0.0054623	2.81679	1.74767e-12	no
16	75.0084	6404.4	no	no	no	yes	Glycolate	C00160	yes	no	Hydroxy Acids and Derivatives	1	C00160	C2H4O3	0.138805	0.210253	0.0018784	0.98062	0.0527794	0.393413	-1.22379	3.25218e-06	A1;B;F4;G;hive	-1.09707	0.0185413	-1.01267	0.0407901	-	-	-1.01592	0.0396153	-	-	-	-	-1.13565	0.0126799	-2.96905	1.64665e-11	-	-	5.01106	1.66634e-11	yes
17	83.0135	7759.48	no	no	no	yes	4-Hydroxy-2-butynal	C02648	yes	no	-	4	C02648; C06144; C17601; C17602	C4H4O2	-0.142744	0.354648	-0.786566	0.000159042	-0.556935	2.85029e-05	-0.754113	0.000251637	B;CL;F5;Fp;G;hive	-	-	-1.4224	0.018208	-2.13298	4.31438e-08	-	-	-1.86799	0.000434969	-1.25015	0.00876256	-1.70821	0.00179522	-2.06604	6.86398e-05	-	-	3.80121	1.41457e-10	yes
18	83.0502	1956.11	no	no	no	yes	Cyclopentanone	C00557	no	no	Cyclic Alcohols and Derivatives	2	C00557; C07330	C5H8O	0.31313	0.0404032	0.668006	6.28654e-06	0.553757	9.98334e-07	1.40558	0.000940027	B;CL;hive	-	-	0.867459	0.00781355	1.24407	1.83185e-08	-	-	-	-	-	-	-	-	3.4842	1.53221e-11	-	-	-0.590941	0.00357593	no
19	84.0453	2833.6	no	no	no	no	Acetone cyanohydrin	C02659	no	no	-	1	C02659	C4H7NO	-0.035464	0.769442	-0.0428698	0.701404	-0.0411669	0.590797	-0.115616	0.319221		-	-	-	-	-	-	-	-	-	-	-	-	-	-	-	-	-	-	2.78997	9.97392e-08	no
20	85.0292	67304.6	no	no	no	yes	Diacetyl	C00741	yes	no	Carbonyl Compounds	9	C00741; C01770; C01771; C02497; C16267; C16835; C19201; C19309; C19443	C4H6O2	-0.433723	0.0181527	-0.61525	1.29127e-05	-0.552361	1.4143e-07	-0.966747	8.77761e-05	A1;CL;F5;Fp;hive;S	-1.57739	0.00105101	-	-	-1.66151	1.57718e-06	-	-	-1.9871	1.41749e-05	-1.36673	0.000464957	-	-	-2.33705	2.77757e-07	-1.89998	3.97034e-07	4.37113	2.85565e-11	yes
21	85.0657	1223.47	no	no	no	no	Prenol	C01390	no	no	Alcohols and Polyols	5	C01390; C01949; C02020; C02223; C07329	C5H10O	0.457658	0.0345133	0.599406	0.0186455	0.566361	0.00239638	-0.0766233	0.58733	F4;Fp	-	-	-	-	-	-	2.49297	6.22119e-08	-	-	1.43726	0.000231395	-	-	-	-	-	-	1.10663	2.51498e-08	no
22	86.0246	2116.79	no	no	no	yes	Dehydroalanine	C02218	no	no	Amino Acids and Derivatives	3	C02218; C06695; C20253	C3H5NO2	1.08817	0.0166035	0.284425	0.00140489	0.622016	0.00711279	-0.487869	2.78697e-05	B;CL;hive	-	-	2.16178	5.48955e-07	0.965842	0.00999985	-	-	-	-	-	-	-	-	-1.27164	0.00981524	-	-	3.04074	6.49661e-10	no
23	87.0086	22992	yes	substrate	no	yes	Pyruvate	C00022	yes	no	Keto-Acids and Derivatives	4	C00022; C00222; C12069; C20363	C3H4O3	-1.63826	4.07475e-08	-1.44422	6.40358e-08	-1.5192	1.49468e-14	-1.4595	7.67242e-08	A1;CL;F5;G;hive;S	0.482367	0.0175365	-	-	-0.857942	1.94201e-10	-	-	-0.962949	2.70054e-08	-	-	3.07057	1.53221e-11	-0.863195	5.51003e-07	-0.509605	0.000613033	3.84327	3.93449e-11	yes
24	87.0449	3228.06	yes	product	no	no	Butanoic acid	C00246	no	no	Fatty Acids and Conjugates	7	C00246; C00466; C00810; C00849; C01769; C02632; C14440	C4H8O2	0.715643	0.00728189	0.726169	5.28955e-06	0.738041	1.34905e-07	0.0901891	0.669177	CL	-	-	-	-	2.06339	9.35e-10	-	-	-	-	-	-	-	-	-	-	-	-	2.6237	1.71691e-12	no
25	88.0403	16790.2	no	no	no	yes	L-Alanine	C00041	yes	no	Amino Acids and Derivatives	8	C00041; C00099; C00133; C00213; C01401; C01537; C02116; C11488	C3H7NO2	0.00876243	0.951779	-0.101908	0.414237	-0.0618627	0.481798	-0.863435	1.07609e-06	hive	-	-	-	-	-	-	-	-	-	-	-	-	-	-	-2.37038	1.97e-05	-	-	2.57421	1.479e-13	yes
26	88.9879	3667.83	no	no	no	no	Oxalate	C00209	no	no	Carboxylic Acids and Derivatives	2	C00209; C18586	(CHO2)2.; C2H2O4	-0.256366	0.0861731	0.0293766	0.835981	-0.0849668	0.396488	0.437007	0.0228153	A1;hive;S	2.1053	4.70277e-05	-	-	-	-	-	-	-	-	-	-	-	-	1.34316	0.0324492	1.3985	0.00197084	3.15512	2.41905e-09	no
27	89.0242	55953.1	no	no	no	no	Glycerone	C00184	yes	no	Monosaccharides	8	C00184; C00186; C00256; C00577; C01013; C01432; C02154; C02426	C3H6O3	0.233278	0.0663421	-0.265762	0.0335222	-0.0927843	0.34526	-0.591104	0.0220327	F4;Fp	-	-	-	-	-	-	2.1298	1.16746e-05	-	-	1.06048	0.029022	-	-	-	-	-	-	6.10614	2.10089e-11	yes
28	93.0346	3982.78	no	no	no	yes	Phenol	C00146	no	no	Phenols and Derivatives	3	C00146; C01782; C15584	C6H6O	0.594049	0.0217703	0.170474	0.636265	0.316086	0.17982	1.01389	0.00148814	hive	-	-	-	-	-	-	-	-	-	-	-	-	-	-	1.97008	0.000702424	-	-	1.40272	5.45112e-09	no
29	94.0299	1190.38	no	no	no	no	2-Hydroxypyridine	C02502	no	no	Hydropyridines	1	C02502	C5H5NO	-0.17098	0.145881	-0.117453	0.171517	-0.139521	0.0332544	1.05814	0.0803137	hive	-	-	-	-	-	-	-	-	-	-	-	-	-	-	2.86117	3.54e-09	-	-	2.12955	3.03871e-11	no
30	95.0137	32095.4	no	no	no	no	Protoanemonin	C07090	no	no	-	2	C07090; C14279	C5H4O2	0.115266	0.162669	-0.167085	0.0258421	-0.0659007	0.289256	-0.25731	0.010818	CL;F4;F5;G;hive;S	-	-	-	-	-1.06993	0.049648	-1.7053	0.00650016	-1.50075	0.0271936	-	-	-2.1495	0.000187628	-1.59818	0.0140269	-1.28859	0.0177968	1.082	7.01549e-12	yes
31	95.05	4631.97	no	no	no	yes	Cyclohex-2-enone	C02395	no	no	-	2	C02395; C19249	C6H8O	0.177239	0.0258159	0.160187	0.028215	0.163444	0.00162066	0.573625	0.00595434	hive	-	-	-	-	-	-	-	-	-	-	-	-	-	-	2.85997	2.1e-10	-	-	-0.447287	7.96268e-07	no
32	100.04	18497.9	yes	substrate	no	yes	1-Aminocyclopropane-1-carboxylate	C01234	no	no	Amino Acids and Derivatives	8	C01234; C02926; C07509; C08267; C11106; C17234; C19456; C19777	C4H7NO2	-0.720106	2.30345e-05	-0.96138	1.24397e-08	-0.874849	1.79946e-14	-1.26519	5.10696e-09	CL;F4;F5;Fp;G;hive	-	-	-	-	-1.90783	1.53414e-11	0.968307	0.000651327	-1.81854	8.88103e-11	-0.643393	0.0126499	-1.0889	7.96763e-05	-2.29031	1.53818e-11	-	-	0.525153	3.53182e-09	no
33	100.077	4165.76	no	no	no	no	Pentanamide	C01842	no	no	-	7	C01842; C03982; C10974; C12455; C17255; C19491; C20312	C5H11NO	0.201731	0.187833	0.100799	0.198689	0.122043	0.265539	-0.207917	0.285259	G	-	-	-	-	-	-	-	-	-	-	-	-	2.11781	5.34e-05	-	-	-	-	-0.731431	3.92026e-11	no
34	101.024	176327	yes	substrate	no	yes	2-Oxobutanoate	C00109	no	no	Keto-Acids and Derivatives	5	C00109; C00164; C00232; C00349; C06002	C4H6O3	-0.478599	0.000221754	-0.603725	2.521e-08	-0.557418	4.48852e-13	-1.00429	2.58873e-07	A1;CL;F5;Fp;hive;S	-0.812632	0.00870756	-	-	-2.10421	1.53254e-11	-	-	-1.98772	1.93175e-11	-0.666109	0.00927486	-	-	-3.08594	1.53225e-11	-1.07918	1.63981e-06	1.71898	3.04029e-10	yes
35	101.061	23064.4	yes	product	no	yes	Valerate	C00803	no	synonym	Fatty Acids and Conjugates	3	C00803; C08262; C18319	C5H10O2	1.18914	0.000172599	0.995433	3.64904e-06	1.06626	1.28328e-10	1.12548	0.00449899	B;CL;hive	-	-	1.99377	1.56245e-08	1.79298	8.35669e-11	-	-	-	-	-	-	-	-	2.13232	1.97231e-09	-	-	-1.24284	1.31389e-14	yes
36	101.073	20176.8	no	no	no	no	N-Nitrosodiethylamine	C14422	no	no	-	1	C14422	C4H10N2O	0.203444	0.0564127	0.0493601	0.610432	0.106963	0.126189	0.0844563	0.344877		-	-	-	-	-	-	-	-	-	-	-	-	-	-	-	-	-	-	-1.60771	2.77923e-12	no
37	102.056	102830	no	no	no	yes	4-Aminobutanoate	C00334	yes	no	Amino Acids and Derivatives	12	C00334; C01026; C01205; C02261; C02356; C02721; C03284; C03665; C05145; C11109; C11735; C19514	C4H9NO2	0.0190523	0.923893	0.0691522	0.446086	0.0490336	0.518945	-0.697256	4.90015e-05	hive;S	-	-	-	-	-	-	-	-	-	-	-	-	-	-	-1.89448	5.36013e-05	-1.43317	0.000268892	3.84695	3.61216e-15	yes
38	103.04	13086	yes	product	no	yes	4-Hydroxybutyric acid	C00989	no	based on Zheng et al. 2017	Hydroxy Acids and Derivatives	8	C00989; C01089; C01188; C01991; C03197; C05984; C06001; C14601	C4H8O3	0.776609	0.00657106	0.58087	5.98379e-05	0.64902	3.65478e-07	0.821711	0.00124255	CL;F4;F5;hive	-	-	-	-	1.21341	0.000139423	2.41686	4.83676e-09	1.22359	0.00807635	-	-	-	-	1.87856	4.5171e-06	-	-	1.50557	7.81303e-15	yes
39	104.035	31934.9	no	no	no	yes	L-Serine	C00065	yes	no	Amino Acids and Derivatives	3	C00065; C00716; C00740	C3H7NO3	-0.0287678	0.879658	-0.045581	0.711726	-0.0406052	0.660988	-1.23134	2.45135e-06	F4;hive	-	-	-	-	-	-	-1.41672	0.0114146	-	-	-	-	-	-	-2.70271	3.29757e-08	-	-	4.30653	1.64154e-12	yes
40	105.019	10466.3	no	no	no	yes	D-Glycerate	C00258	yes	no	Sugar Acids and Derivatives	1	C00258	C3H6O4	-1.0255	1.71217e-05	-0.650549	0.0358904	-0.764092	0.000527572	-1.42895	0.000114085	A1;B;CL;hive;S	-1.61943	0.000675147	-1.48435	0.00254347	-0.875704	0.0460159	-	-	-	-	-	-	-	-	-1.51659	0.0018654	-1.4239	0.000221957	4.68461	4.96234e-12	yes
41	106.99	977.33	no	no	no	no	(S)-2-Chloropropanoate	C20608	no	no	-	1	C20608	C3H5ClO2	0.172803	0.193659	0.180489	0.121624	0.183803	0.0339344	0.0436031	0.721065		-	-	-	-	-	-	-	-	-	-	-	-	-	-	-	-	-	-	-3.03755	0.000188509	no
42	107.014	1782.5	no	no	no	no	p-Benzoquinone	C00472	no	no	Benzoquinones	2	C00472; C02351	C6H4O2	-0.0650995	0.632456	-1.31933	0.179123	-0.952832	0.157953	-1.07162	0.22237		-	-	-	-	-	-	-	-	-	-	-	-	-	-	-	-	-	-	1.80459	4.98931e-12	no
43	107.05	11103.7	yes	product	no	yes	Benzyl alcohol	C00556	no	no	Not Available	6	C00556; C01403; C01467; C01468; C01542; C03485	C7H8O	0.383115	0.000142445	0.63611	2.11073e-07	0.551655	7.90523e-10	0.769283	0.00266737	CL;Fp;hive;S	-	-	-	-	2.15477	2.06376e-11	-	-	-	-	0.859447	0.0295221	-	-	2.73917	3.32916e-11	0.959125	0.00898893	0.478514	2.06168e-07	yes
44	108.021	9228.67	no	no	no	no	p-Benzosemiquinone	C02389	no	no	-	2	C02389; C05060	C6H5O2	0.296917	0.000399554	-0.0721509	0.847514	0.0547673	0.828102	-0.20742	0.602314		-	-	-	-	-	-	-	-	-	-	-	-	-	-	-	-	-	-	1.23259	2.36831e-11	no
45	108.045	14203.4	no	no	no	no	2-Aminophenol	C01987	no	no	-	4	C01987; C02372; C02720; C05058	C6H7NO	0.195896	0.00755453	0.524897	0.0143377	0.418897	0.00350772	0.224903	0.0222541	CL	-	-	-	-	1.80211	7.46e-05	-	-	-	-	-	-	-	-	-	-	-	-	0.629548	4.753e-08	yes
46	109.029	50783	no	no	no	no	Catechol	C00090	no	no	Phenols and Derivatives	6	C00090; C00530; C01751; C01785; C11115; C15571	C6H6O2	0.494115	0.00018551	-0.742743	0.427038	-0.397921	0.541533	0.0224903	0.97672		-	-	-	-	-	-	-	-	-	-	-	-	-	-	-	-	-	-	1.60416	8.08759e-10	yes
47	109.04	21116	no	no	no	yes	N-Acetylimidazole	C02560	no	no	-	2	C02560; C05130	C5H6N2O	0.30603	0.00439076	-0.143299	0.691248	0.0135403	0.952483	1.0372	0.000554255	hive	-	-	-	-	-	-	-	-	-	-	-	-	-	-	2.21991	5.1e-05	-	-	1.63298	5.24664e-15	yes
48	110.025	11166.6	no	no	no	no	2,5-Dihydroxypyridine	C01059	yes	no	-	5	C01059; C02932; C03056; C03927; C05942	C5H5NO2	0.281295	0.00715201	0.122762	0.0824468	0.178248	0.000728967	1.27597	0.0262726	hive	-	-	-	-	-	-	-	-	-	-	-	-	-	-	3.38752	1.53e-11	-	-	2.19328	1.78839e-10	yes
49	110.976	1903	no	no	no	no	Monomethyl sulfate	C02704	no	no	-	1	C02704	CH4O4S	-0.228527	0.0925395	0.0229809	0.847514	-0.0566004	0.527707	-0.431866	0.0132619		-	-	-	-	-	-	-	-	-	-	-	-	-	-	-	-	-	-	0.423925	3.69733e-05	no
50	111.009	383700	yes	substrate	yes	yes	2-Furoate	C01546	yes	no	Furans	1	C01546	C5H4O3	-2.80147	0.000111927	-2.41103	8.17577e-06	-2.59472	4.60402e-09	-2.50336	7.4815e-06	CL;F5;Fp;hive;S	-	-	-	-	-1.70404	9.51811e-08	-	-	-1.72339	5.06756e-05	-1.6076	3.3578e-06	-	-	-1.72851	4.77371e-05	-1.36268	0.000113539	4.21194	1.14244e-10	yes
51	111.019	53312	yes	substrate	no	yes	Uracil	C00106	yes	no	Diazines	2	C00106; C18474	C4H4N2O2	-1.54624	1.28542e-05	-1.32688	2.32133e-08	-1.41034	5.24043e-14	-1.65882	1.85738e-08	A1;CL;F5;Fp;hive;S	-0.98228	0.0231939	-	-	-1.93285	2.83148e-11	-	-	-1.38612	0.00018442	-0.952828	0.00331868	-	-	-2.19619	1.91609e-09	-1.61712	5.70366e-08	4.05624	7.25566e-11	yes
52	111.045	7543.96	no	no	no	no	Cyclohexane-1,3-dione	C01066	no	no	-	6	C01066; C04091; C04221; C06105; C08063; C08502	C6H8O2	-0.295214	0.00159419	-0.133024	0.0330573	-0.191766	8.51924e-05	0.0656323	0.625049	B	-	-	1.41875	0.0463676	-	-	-	-	-	-	-	-	-	-	-	-	-	-	0.580086	5.22558e-10	no
53	112.04	10355.9	no	no	no	no	1-Pyrroline-2-carboxylate	C03564	yes	no	Amino Acids and Derivatives	4	C03564; C03912; C04322; C07275	C5H7NO2	0.0652428	0.461234	0.0231038	0.577077	0.0373759	0.302429	-0.184374	0.107959	B;F4;G;hive	-	-	1.69313	2.92175e-05	-	-	1.54681	0.000171953	-	-	-	-	2.14428	9.27998e-08	-1.02455	0.0427366	-	-	2.02357	1.36541e-15	yes
54	112.052	3042.1	no	no	no	yes	Creatinine	C00791	no	no	Lactams	2	C00791; C19280	C4H7N3O	0.0834068	0.711572	-0.076932	0.72209	-0.0165256	0.912778	-0.942997	0.000776067	F5;hive	-	-	-	-	-	-	-	-	-1.66512	0.0106275	-	-	-	-	-1.53645	0.0254166	-	-	0.8065	4.82806e-06	no
55	113.024	240238	no	no	no	no	2-Hydroxy-2,4-pentadienoate	C00596	yes	no	-	2	C00596; C07091	C5H6O3	0.302573	0.0549917	-0.363925	0.031773	-0.137262	0.298502	-0.468525	0.0540111	A1;CL;F4;F5;Fp;G	-1.60668	0.0220452	-	-	-1.18288	0.0305665	-1.78091	0.00683749	-1.63931	0.0178461	-1.74656	0.00054769	-1.54312	0.0328856	-	-	-	-	4.48942	1.99279e-11	yes
56	113.035	41949.2	yes	substrate	no	yes	5,6-Dihydrouracil	C00429	yes	no	Diazines	5	C00429; C02512; C02565; C02777; C08311	C4H6N2O2	-0.52301	0.00203332	-0.763042	8.26694e-05	-0.680833	3.23197e-07	-1.04552	1.94401e-05	CL;hive	-	-	-	-	-1.57768	8.37298e-07	-	-	-	-	-	-	-	-	-1.98016	2.62519e-06	-	-	5.05155	1.5621e-08	yes
57	113.061	6205.63	yes	product	no	no	2-Hydroxycyclohexan-1-one	C01147	no	no	-	3	C01147; C01880; C03228	C6H10O2	0.451579	0.000504325	0.673105	3.88054e-05	0.611809	1.30399e-06	1.2439	0.0113598	CL;hive	-	-	-	-	1.32771	2.38227e-06	-	-	-	-	-	-	-	-	3.05601	1.54147e-11	-	-	0.818718	6.53938e-08	no
58	113.097	1909.84	yes	product	no	yes	2-Heptanone	C08380	no	no	Carbonyl Compounds	2	C08380; C14390	C7H14O	0.860435	0.000793086	0.599353	0.00035576	0.693016	4.26436e-08	0.67049	0.00294959	CL;F4;hive	-	-	-	-	1.30977	0.00082776	1.29044	0.0317349	-	-	-	-	-	-	1.50451	0.00573729	-	-	1.17429	0.0581646	no
59	114.019	13568.3	no	no	no	yes	Maleamate	C01596	yes	no	-	1	C01596	C4H5NO3	-0.39351	0.0200268	-0.591531	0.000208278	-0.526686	8.84805e-06	-0.849694	3.33716e-05	CL;F5;hive	-	-	-	-	-1.31399	0.000204753	-	-	1.16335	0.0400683	-	-	-	-	-1.73877	0.000181495	-	-	5.12688	7.28889e-08	yes
60	114.056	2.46191e+06	no	no	no	no	L-Proline	C00148	no	no	Amino Acids and Derivatives	4	C00148; C00763; C16435; C18170	C5H9NO2	0.327711	0.0561218	0.0442744	0.811004	0.144712	0.285174	0.180357	0.686866		-	-	-	-	-	-	-	-	-	-	-	-	-	-	-	-	-	-	4.40649	3.58157e-12	no
61	115.004	58326.6	yes	substrate	no	yes	Fumarate	C00122	yes	no	Fatty Acids and Conjugates	3	C00122; C01384; C02150	C4H4O4	-1.11814	5.63296e-06	-1.39799	1.68831e-06	-1.29827	1.21203e-11	0.595695	0.000329924	A1;B;CL;F5;G;hive;S	-1.82501	5.55164e-11	-1.68829	5.96604e-10	-1.57212	1.57906e-11	-	-	-1.41222	1.30813e-07	-	-	-1.00531	0.00027295	1.2951	1.26607e-06	-1.71614	1.56851e-11	4.1797	1.04017e-12	yes
62	115.04	15532.2	no	no	no	yes	3-Methyl-2-oxobutanoic acid	C00141	yes	no	Fatty Acids and Conjugates	4	C00141; C02233; C03273; C06255	C5H8O3	-0.120626	0.572312	-0.10866	0.436267	-0.10952	0.310644	-0.525016	0.00306401	F4;F5;S	-	-	-	-	-	-	-1.74909	0.00519367	-1.66023	0.00990263	-	-	-	-	-	-	-1.49019	0.00332838	2.18645	4.32345e-11	yes
63	115.076	13012.2	yes	product	no	yes	Hexanoic acid	C01585	no	no	Fatty Acids and Conjugates	6	C01585; C02948; C03739; C12293; C12304; C12313	C6H12O2	0.617321	0.000335232	0.581447	3.21202e-07	0.593078	9.60522e-12	0.187979	0.00581267	CL;S	-	-	-	-	2.19033	1.67986e-10	-	-	-	-	-	-	-	-	-	-	1.15967	0.00324346	0.545562	1.31379e-07	yes
64	115.088	3016.97	no	no	no	no	5-Aminopentanamide	C00990	no	no	Amino Acids and Derivatives	1	C00990	C5H12N2O	0.292651	0.139697	0.514072	5.57852e-05	0.435209	1.41859e-05	-0.0855186	0.654945	A1;CL	-1.2826	0.0216134	-	-	1.67266	2.63632e-06	-	-	-	-	-	-	-	-	-	-	-	-	1.21392	2.84118e-10	no
65	116.035	8194.93	no	no	no	no	L-Aspartate 4-semialdehyde	C00441	no	no	Amino Acids and Derivatives	4	C00441; C03214; C03508; C20250	C4H7NO3	0.297214	0.0283738	0.322246	0.00330178	0.316241	9.22075e-05	0.0236494	0.877632	CL;F4;F5	-	-	-	-	0.902978	0.00331657	2.98573	1.54591e-11	0.961985	0.0366809	-	-	-	-	-	-	-	-	2.76789	5.64023e-10	no
66	116.072	203222	no	no	no	yes	L-Valine	C00183	yes	no	Amino Acids and Derivatives	10	C00183; C00431; C00719; C01799; C01826; C03571; C06417; C07457; C15987; C16436	C5H11NO2	-0.309939	0.377209	-0.352659	0.132604	-0.351721	0.0677362	0.691031	0.00104435	hive	-	-	-	-	-	-	-	-	-	-	-	-	-	-	1.63104	0.0161018	-	-	2.07209	1.90095e-14	yes
67	117.019	188055	yes	product	yes	no	Succinate	C00042	yes	no	Carboxylic Acids and Derivatives	3	C00042; C02170; C10900	C4H6O4	2.73459	0.00562859	2.33741	0.000111769	2.48416	7.93604e-07	1.42185	0.100732	CL;F5	-	-	-	-	1.75936	1.67477e-08	-	-	2.53723	9.42104e-10	-	-	-	-	-	-	-	-	2.70144	9.77689e-14	yes
68	117.055	28315.2	yes	product	no	yes	5-Hydroxypentanoate	C02804	no	no	-	2	C02804; C20827	C5H10O3	0.564798	0.00704825	0.702085	0.00757672	0.652474	0.000234251	-0.559618	0.000589944	F4;F5	-	-	-	-	-	-	2.22242	1.33395e-05	1.94361	0.000195492	-	-	-	-	-	-	-	-	1.76332	1.61866e-11	yes
69	118.051	46851	no	no	no	yes	L-Threonine	C00188	yes	no	Amino Acids and Derivatives	8	C00188; C00263; C00820; C02115; C03678; C05519; C11108; C12317	C4H9NO3	0.0897503	0.679899	0.0985232	0.434366	0.09163	0.357773	-0.439713	0.00605299	F4	-	-	-	-	-	-	-1.59065	0.0197876	-	-	-	-	-	-	-	-	-	-	3.48204	7.78868e-12	yes
70	118.98	348773	no	no	no	yes	Mercaptopyruvate	C00957	yes	no	Keto-Acids and Derivatives	1	C00957	C3H4O3S	-0.156042	0.363822	-1.0318	0.000298729	-0.743683	0.000314006	-0.997983	0.00215053	A1;B;CL;F5;Fp;G;hive;S	-1.50703	0.00470562	-1.35046	0.0174011	-2.03507	3.31253e-08	-	-	-2.29559	1.96824e-06	-1.58802	8.92435e-05	-1.81956	0.000258884	-1.98887	4.7881e-05	-1.11349	0.0172872	3.69116	6.8567e-12	yes
71	119.035	49402.5	no	no	no	yes	D-Erythrose	C01796	yes	no	Oxolanes	4	C01796; C02022; C02045; C06463	C4H8O4	-0.188229	0.138148	-0.251802	0.00173257	-0.22232	0.00127968	-0.71105	0.00355395	A1;CL;F4;G;hive;S	-2.34268	3.25123e-10	-	-	-0.940137	0.00145682	0.966826	0.0298114	-	-	-	-	-1.20959	0.00200292	-2.28425	7.33909e-10	-0.867919	0.0120608	3.88263	1.13264e-12	yes
72	119.05	52669.2	yes	substrate	no	no	Phenylacetaldehyde	C00601	no	no	Phenylacetaldehydes	8	C00601; C02083; C05627; C06758; C07113; C07209; C07214; C20782	C8H8O	-1.44092	5.08702e-06	-1.0418	0.000254926	-1.20682	3.06086e-08	-0.422986	0.0497241	CL;F5;G;S	-	-	-	-	-1.19846	0.000379682	-	-	-1.18509	0.0190443	-	-	1.76445	4.55744e-05	-	-	-0.903805	0.0407424	1.93861	3.61216e-15	yes
73	120.012	6041.85	no	no	no	no	L-Cysteine	C00097	no	no	-	3	C00097; C00736; C00793	C3H7NO2S	0.00995432	0.951779	0.271034	0.010186	0.17002	0.0334043	-0.368676	0.0797635	G	-	-	-	-	-	-	-	-	-	-	-	-	1.35968	0.0432539	-	-	-	-	1.658	3.27082e-08	no
74	120.045	6215.9	yes	product	no	yes	Benzamide	C09815	no	no	Benzamides	1	C09815	C7H7NO	0.421279	3.95083e-05	0.324528	2.78623e-05	0.356776	8.89157e-10	2.31191	0.00370113	hive	-	-	-	-	-	-	-	-	-	-	-	-	-	-	3.81846	1.53e-11	-	-	1.3625	1.45139e-14	no
75	120.996	36157.3	no	no	no	no	3-Mercaptolactate	C05823	yes	no	Hydroxy Acids and Derivatives	2	C05823; C19296	C3H6O3S	0.811827	0.0100874	-0.0440314	0.819143	0.224823	0.18302	0.0747678	0.696727	A1;Fp;G	-1.82774	0.00207464	-	-	-	-	-	-	-	-	-1.37893	0.00681444	-1.71861	0.00484802	-	-	-	-	3.20131	1.22097e-13	yes
76	121.029	52894.9	yes	product	no	yes	Benzoate	C00180	no	no	Benzoic Acid and Derivatives	6	C00180; C00539; C00633; C03067; C06202; C15474	C7H6O2	0.77234	0.000125189	0.790711	9.01129e-08	0.790796	4.84783e-12	1.5841	0.00200904	CL;F5;hive	-	-	-	-	1.34966	1.56223e-11	-	-	0.691323	0.00629819	-	-	-	-	3.69476	1.53221e-11	-	-	1.42993	7.76986e-16	yes
77	121.04	9030.59	yes	product	no	yes	Nicotinamide	C00153	no	no	Pyridines and Derivatives	3	C00153; C01950; C02421	C6H6N2O	0.414179	0.00921422	0.396215	5.54856e-07	0.405662	1.62149e-09	0.84963	0.000272342	CL;hive	-	-	-	-	1.32604	3.48377e-10	-	-	-	-	-	-	-	-	3.36509	1.53221e-11	-	-	1.45041	2.03351e-11	yes
78	121.05	8512.82	no	no	no	yes	Erythritol	C00503	no	no	Sugar Alcohols	2	C00503; C16884	C4H10O4	0.425682	0.0781063	0.19874	0.286038	0.282201	0.0376472	-0.776993	0.00247426	hive	-	-	-	-	-	-	-	-	-	-	-	-	-	-	-1.52819	0.036011	-	-	1.70208	2.08138e-12	no
79	122.025	14383.4	no	no	no	no	Nicotinate	C00253	no	no	Pyridines and Derivatives	4	C00253; C06813; C07446; C10164	C6H5NO2	0.0266521	0.769392	0.108994	0.0699389	0.076372	0.0978702	0.0806858	0.617224		-	-	-	-	-	-	-	-	-	-	-	-	-	-	-	-	-	-	1.82725	9.7985e-11	yes
80	122.061	3955.04	no	no	no	no	ortho-Anisidine	C19191	no	no	-	2	C19191; C19326	C7H9NO	0.26203	0.0542831	0.207649	0.0256571	0.22667	0.00124935	-0.0819136	0.484763		-	-	-	-	-	-	-	-	-	-	-	-	-	-	-	-	-	-	1.54456	5.45112e-09	no
81	124.007	1.62408e+06	no	no	no	yes	Taurine	C00245	no	no	Sulfonic Acids and Derivatives	1	C00245	C2H7NO3S	0.35993	0.0402398	0.0571203	0.670472	0.165161	0.0872824	0.617068	0.00904935	hive	-	-	-	-	-	-	-	-	-	-	-	-	-	-	2.21409	1.67e-05	-	-	-0.896241	0.00418728	no
82	124.991	58253.6	no	no	no	no	2-Hydroxyethanesulfonate	C05123	no	no	Sulfonic Acids and Derivatives	2	C05123; C19177	C2H6O4S	0.264141	0.0428979	0.222024	0.0127821	0.241465	0.000410415	0.162435	0.238552	F4	-	-	-	-	-	-	2.0488	0.000904797	-	-	-	-	-	-	-	-	-	-	-1.19616	3.70224e-11	yes
83	125.024	102614	no	no	no	no	1,2,3-Trihydroxybenzene	C01108	yes	no	Phenols and Derivatives	7	C01108; C02183; C02752; C02814; C11101; C11918; C20718	C6H6O3	0.126181	0.237466	0.0260016	0.921099	0.0748751	0.704108	-0.139844	0.785693		-	-	-	-	-	-	-	-	-	-	-	-	-	-	-	-	-	-	2.23648	2.08138e-12	yes
84	125.036	40176.8	yes	product	no	no	Thymine	C00178	no	no	Diazines	2	C00178; C02835	C5H6N2O2	1.1201	0.00203332	1.28903	1.16314e-07	1.24334	3.54325e-10	0.941068	0.0873216	CL;F4;F5;Fp;hive	-	-	-	-	2.02996	5.89676e-11	2.26376	9.78976e-09	1.29743	0.00210436	1.04609	0.0028683	-	-	1.29359	0.0021964	-	-	0.835498	1.07482e-09	yes
85	125.061	6149.76	yes	product	no	yes	Toluene-cis-dihydrodiol	C04592	no	no	-	2	C04592; C12101	C7H10O2	0.445912	1.6838e-05	0.521207	1.9034e-07	0.494281	1.5862e-12	1.3363	0.00104435	B;CL;hive	-	-	0.718658	0.00144363	1.10089	5.27639e-11	-	-	-	-	-	-	-	-	3.85816	1.53221e-11	-	-	-0.244076	9.43732e-05	no
86	126.019	10630	yes	product	no	no	2,3,6-Trihydroxypyridine	C03458	no	no	-	2	C03458; C19721	C5H5NO3	0.490143	0.00507707	0.424383	0.00842845	0.447367	9.60033e-05	0.10943	0.131994	CL	-	-	-	-	1.24438	0.0453046	-	-	-	-	-	-	-	-	-	-	-	-	0.873	2.60536e-12	no
87	126.056	9201.49	no	no	no	yes	(S)-2,3,4,5-Tetrahydropyridine-2-carboxylate	C00450	no	no	Hydropyridines	6	C00450; C04092; C08268; C08292; C10149; C13694	C6H9NO2	-0.278898	0.00271778	-0.155098	0.014847	-0.208131	0.000107917	-0.572831	0.000353286	B;hive	-	-	1.24449	0.011976	-	-	-	-	-	-	-	-	-	-	-2.58178	2.96193e-09	-	-	0.730888	2.81604e-06	yes
88	126.092	2716.64	yes	substrate	no	yes	N-Cyclohexylformamide	C11519	no	no	-	1	C11519	C7H13NO	-1.43551	0.000421726	-1.19928	0.000120114	-1.29109	3.23183e-08	-2.22012	7.09835e-06	A1;B;CL;F4;F5;Fp;G;hive;S	-1.5852	2.11083e-05	-1.49217	7.27292e-05	-1.61588	1.15246e-08	-1.49217	7.27292e-05	1.07378	0.0115135	-1.52487	5.49067e-07	-1.08478	0.010225	-2.24812	1.99117e-09	-1.29241	2.64432e-05	0.960027	1.73531e-09	no
89	127.015	4275.64	no	no	no	yes	Barbiturate	C00813	no	no	Diazines	1	C00813	C4H4N2O3	1.83948	0.0168485	0.70655	1.17203e-05	1.21945	0.00231097	-0.839626	0.000331634	B;CL;F4	-	-	2.29535	1.5094e-08	1.43651	2.85951e-06	1.16412	0.012296	-	-	-	-	-	-	-	-	-	-	0.804393	6.77414e-09	no
90	127.021	3172.26	no	no	no	no	3-Fluorocatechol	C16472	no	no	-	2	C16472; C16473	C6H5FO2	0.673711	0.00585187	0.0258949	0.777906	0.247829	0.00852072	0.23517	0.210004	G	-	-	-	-	-	-	-	-	-	-	-	-	-1.51405	0.0366709	-	-	-	-	0.906633	0.000129504	no
91	127.04	17210.6	no	no	no	no	Dihydro-4,4-dimethyl-2,3-furandione	C01125	no	no	-	7	C01125; C06719; C06761; C11354; C20240; C20443; C20717	C6H8O3	0.146765	0.047087	0.222422	0.0771971	0.201298	0.0161946	-0.174796	0.14532	B	-	-	2.00486	0.000805853	-	-	-	-	-	-	-	-	-	-	-	-	-	-	1.10768	6.67461e-12	yes
92	127.051	164834	no	no	no	yes	5,6-Dihydrothymine	C00906	no	no	Diazines	3	C00906; C05715; C05717	C5H8N2O2	-0.303488	0.363921	-0.728898	0.0422451	-0.574079	0.0151474	-1.08096	0.00848342		-	-	-	-	-	-	-	-	-	-	-	-	-	-	-	-	-	-	0.487263	3.74591e-05	yes
93	127.076	11045.7	no	no	no	no	Ethyl tiglate	C08487	no	no	Fatty Acid Esters	7	C08487; C09822; C10921; C10976; C11950; C13714; C13717	C7H12O2	-0.328492	0.0413305	-0.510458	0.00274885	-0.441872	0.000289768	0.158651	0.209749	A1;F5	-1.44463	0.00974497	-	-	-	-	-	-	-1.44895	0.00940604	-	-	-	-	-	-	-	-	-0.449761	3.31302e-06	no
94	127.113	1944.98	no	no	no	yes	1-Octanal	C01545	no	no	Carbonyl Compounds	4	C01545; C07288; C14272; C17145	C8H16O	0.97043	0.0345956	0.867309	0.0189448	0.910724	0.000957398	0.480107	0.00341925	CL;F4	-	-	-	-	1.51483	0.000761622	1.55837	0.0195015	-	-	-	-	-	-	-	-	-	-	-4.15786	0.0206388	no
95	128.035	453764	no	no	no	yes	4-Oxoproline	C01877	no	no	-	5	C01877; C01879; C02237; C04281; C04282	C5H7NO3	-0.283347	0.58294	-0.702549	0.178679	-0.547132	0.11652	-1.99278	0.00808394		-	-	-	-	-	-	-	-	-	-	-	-	-	-	-	-	-	-	1.48663	1.99365e-07	yes
96	128.071	39681.6	no	no	no	no	L-Pipecolate	C00408	yes	no	Amino Acids and Derivatives	5	C00408; C03969; C05936; C07500; C13696	C6H11NO2	0.399883	0.00715201	0.238981	0.132979	0.277825	0.128278	-0.230273	0.308159	G	-	-	-	-	-	-	-	-	-	-	-	-	1.84345	0.00109585	-	-	-	-	3.51612	4.95434e-06	yes
97	128.108	4693.65	no	no	no	yes	N-Methylhexanamide	C02722	no	no	-	1	C02722	C7H15NO	-0.432555	0.0288997	-0.00948245	0.927007	-0.194713	0.0813467	-2.73705	1.85738e-08	A1;B;G;hive;S	-2.01032	1.55141e-11	0.657261	0.0358327	-	-	-	-	-	-	-	-	0.880883	0.000944955	-2.16911	1.53711e-11	-1.26247	2.09445e-09	1.19392	4.01668e-07	no
98	129.019	138325	no	no	no	no	2,5-Dioxopentanoate	C00433	yes	no	-	7	C00433; C00490; C01732; C02132; C02214; C02226; C02800	C5H6O4	0.103166	0.620703	-0.0386814	0.758528	0.00447881	0.967625	-0.617449	0.0207979	F4;S	-	-	-	-	-	-	1.71711	0.00139732	-	-	-	-	-	-	-	-	-1.44969	0.00096039	5.74749	4.79215e-13	yes
99	129.055	22393.2	no	no	no	no	4-Methyl-2-oxopentanoate	C00233	no	no	Fatty Acids and Conjugates	14	C00233; C00671; C00902; C01012; C02122; C02129; C03241; C03465; C03467; C03500; C06008; C06102; C12314; C14530	C6H10O3	-2.12702	0.0275389	-2.12616	0.0155872	-2.12205	0.00052802	-2.22601	0.0123939	B;CL;F4;F5;Fp;hive;S	-	-	-1.66186	0.0142039	-1.57434	0.000719945	-1.63526	0.0169557	-1.78699	0.00598011	-1.23626	0.039967	-	-	-1.60563	0.0205911	-1.63255	0.00142563	0.29279	0.0633198	yes
100	129.092	7115.89	no	no	no	yes	Ethyl isovalerate	C12290	no	no	Fatty Acid Esters	3	C12290; C12296; C17714	C7H14O2	0.310819	0.0586664	0.26534	0.00399275	0.283705	0.000177167	0.56899	0.0078971	hive	-	-	-	-	-	-	-	-	-	-	-	-	-	-	2.23966	6.73e-06	-	-	-1.32293	3.44864e-11	no
101	129.103	5932.81	no	no	no	no	N-Acetylputrescine	C02714	no	no	Carboxylic Acids and Derivatives	2	C02714; C19279	C6H14N2O	0.733702	0.313939	0.146723	0.298292	0.366166	0.142421	-0.110273	0.419005		-	-	-	-	-	-	-	-	-	-	-	-	-	-	-	-	-	-	0.771146	5.86902e-07	no
102	130.051	141138	yes	product	no	yes	5-Aminolevulinate	C00430	yes	no	Amino Acids and Derivatives	12	C00430; C01015; C01073; C01110; C01157; C01165; C03341; C03440; C03651; C03741; C05147; C19706	C5H9NO3	0.358277	0.00452635	0.372527	7.95087e-06	0.367533	7.51157e-09	1.82801	0.000428698	CL;hive	-	-	-	-	0.449941	0.000206651	-	-	-	-	-	-	-	-	3.89509	1.53221e-11	-	-	3.87874	2.64416e-12	yes
103	130.087	641560	no	no	no	no	L-Leucine	C00123	no	no	Amino Acids and Derivatives	11	C00123; C00407; C01570; C01933; C02378; C02486; C06418; C08263; C16434; C16439; C16647	C6H13NO2	0.0124366	0.964118	0.0449067	0.818916	0.0228215	0.876684	-0.27522	0.306566		-	-	-	-	-	-	-	-	-	-	-	-	-	-	-	-	-	-	1.76487	3.10359e-12	yes
104	131.018	3931.88	no	no	no	yes	THTC	C11074	yes	no	-	1	C11074	C5H8O2S	0.135819	0.266499	0.0558134	0.545812	0.0898117	0.20668	-0.385545	0.00464197	hive	-	-	-	-	-	-	-	-	-	-	-	-	-	-	-1.55067	0.0208388	-	-	3.42437	4.25723e-11	yes
105	131.035	58776	yes	product	no	no	Glutarate	C00489	yes	no	Carboxylic Acids and Derivatives	8	C00489; C00900; C02674; C03589; C04106; C04181; C06010; C11838	C5H8O4	0.577295	0.00449833	0.666529	1.78376e-05	0.653886	8.00602e-07	0.294235	0.159078	CL	-	-	-	-	1.89174	1.79e-07	-	-	-	-	-	-	-	-	-	-	-	-	3.35803	2.12615e-11	yes
106	131.046	92357.5	yes	substrate	no	yes	L-Asparagine	C00152	yes	no	Amino Acids and Derivatives	8	C00152; C01043; C01905; C02037; C02642; C16438; C19258; C19301	C4H8N2O3	-0.833767	0.00201862	-0.956604	0.00173097	-0.929574	1.42821e-05	-1.25624	0.000432814	CL;G;hive	-	-	-	-	-1.19607	0.000664112	-	-	-	-	-	-	1.26837	0.0127573	-1.43451	0.0026758	-	-	6.0999	9.80228e-07	yes
107	131.071	79401.4	no	no	no	yes	D-2-Hydroxyisocaproate	C03264	no	no	Fatty Acids and Conjugates	4	C03264; C03499; C06103; C07834	C6H12O3	0.36266	0.085372	0.525635	0.102757	0.497628	0.0401892	-0.582149	0.00946507	F4;F5;Fp	-	-	-	-	-	-	2.45692	3.9501e-08	1.12939	0.0461383	1.44161	0.000125087	-	-	-	-	-	-	0.587716	0.00042953	yes
108	131.082	142715	no	no	no	yes	L-Ornithine	C00077	no	no	Amino Acids and Derivatives	5	C00077; C00515; C01602; C03943; C11320	C5H12N2O2; C5H12N2O2.	-0.0175791	0.943125	0.289079	0.0377342	0.174504	0.11133	-1.24881	2.6667e-06	F5;hive	-	-	-	-	-	-	-	-	1.40502	0.0135029	-	-	-	-	-1.98188	7.1394e-05	-	-	1.50933	2.07122e-10	yes
109	132.03	75263.4	no	no	no	yes	L-Aspartate	C00049	yes	no	Amino Acids and Derivatives	4	C00049; C00402; C16433; C19911	C4H7NO4	-0.473099	0.16297	-2.08907	0.000228042	-1.42906	1.12328e-05	-2.34707	0.000171634	A1;B;CL;Fp;G;hive;S	-1.05259	0.0351314	-1.23211	0.00624961	-1.85026	2.58291e-09	-	-	-	-	-1.95233	5.84792e-09	-1.89397	2.69075e-06	-1.94335	1.43725e-06	-1.91079	1.12629e-08	5.06095	2.43021e-13	yes
110	132.066	24429.1	no	no	no	no	N-Hydroxy-L-valine	C20313	no	no	-	1	C20313	C5H11NO3	0.0735525	0.542317	0.331149	4.11549e-05	0.235795	0.000138496	-0.00281407	0.983376	CL;F5;Fp	-	-	-	-	1.8645	1.04282e-05	-	-	1.53438	0.0192303	1.30636	0.0134669	-	-	-	-	-	-	1.50959	2.91622e-12	yes
111	133.014	392619	yes	substrate	no	yes	(S)-Malate	C00149	yes	no	Carboxylic Acids and Derivatives	4	C00149; C00497; C00711; C03064	C4H6O5	-1.52602	1.26736e-05	-1.65762	3.0918e-06	-1.61166	3.05253e-11	-1.37678	6.70977e-06	A1;B;CL;F5;G;hive;S	-2.09097	2.7723e-10	-1.93536	3.28866e-09	-1.69179	4.60161e-11	-	-	-1.75701	5.91817e-08	-	-	-0.881852	0.0228543	-1.52308	2.51051e-06	-1.85049	3.69795e-11	4.59671	4.03825e-12	yes
112	133.051	26674.3	yes	product	no	no	Deoxyribose	C01801	yes	no	Monosaccharides	6	C01801; C02783; C04039; C04272; C06257; C08347	C5H10O4	0.932524	0.000302119	0.717406	0.00112579	0.799718	7.3712e-06	0.0416082	0.72163	B	-	-	3.14934	1.84e-11	-	-	-	-	-	-	-	-	-	-	-	-	-	-	2.4357	5.34002e-12	yes
113	135.03	132513	no	no	no	yes	Threonate	C00262	yes	no	Monosaccharides	2	C00262; C01620	C4H8O5; C5H4N4O	0.351009	0.0950265	0.374485	0.00169163	0.365987	0.000121344	-1.51679	8.80548e-07	A1;CL;F4;Fp;hive;S	-1.5373	7.95504e-06	-	-	0.894525	0.00124802	1.06434	0.00511017	-	-	0.818237	0.0119296	-	-	-1.96345	1.28114e-08	0.769791	0.0231092	4.66118	4.70419e-12	yes
114	135.045	102733	yes	substrate	no	no	Phenyl acetate	C00548	no	no	Phenylacetic Acid Derivatives	15	C00548; C01454; C03765; C05613; C06224; C07085; C07086; C07189; C07211; C07215; C10700; C10761; C14087; C15583; C20645	C8H8O2	-1.41326	0.000121263	-0.727968	0.00189629	-1.056	1.57989e-05	-0.514204	0.0220327	CL;F5;G	-	-	-	-	-0.886631	0.0265727	-	-	-1.16346	0.0270398	-	-	2.10904	1.15425e-06	-	-	-	-	0.988106	4.49338e-08	yes
115	136.04	31246.6	yes	product	yes	yes	2-Aminobenzoate	C00108	no	synonym	Prenol Lipids	6	C00108; C00568; C01004; C14394; C19486; C19597	C7H7NO2	3.18935	0.00497573	2.70527	1.1803e-05	2.89197	4.63393e-07	3.15005	5.41531e-05	CL;F4;hive;S	-	-	-	-	1.86099	1.53376e-11	2.01314	1.58072e-11	-	-	-	-	-	-	2.65471	1.53245e-11	0.573985	0.0280829	1.39238	1.63786e-09	yes
116	136.077	3585.58	yes	product	no	no	Tyramine	C00483	no	no	Phenethylamines	8	C00483; C01183; C02735; C03473; C16570; C18396; C19216; C19376	C8H11NO	0.617089	1.70925e-05	0.955702	1.28582e-08	0.831567	8.96035e-14	1.08285	0.037194	CL;hive;S	-	-	-	-	2.28205	1.54526e-11	-	-	-	-	-	-	-	-	2.71607	1.86021e-11	0.807201	0.0317632	1.06399	2.70623e-07	no
117	137.097	17870	no	no	no	yes	Isophorone	C14743	no	no	Cycloalkenes	2	C14743; C16323	C9H14O	-0.137787	0.250617	-0.257519	0.0392525	-0.212328	0.0129607	2.15016	0.00125726	hive	-	-	-	-	-	-	-	-	-	-	-	-	-	-	3.68806	1.53e-11	-	-	-0.627619	1.41465e-09	no
118	140.012	76679.3	no	no	no	yes	Ethanolamine phosphate	C00346	no	no	Organic Phosphoric Acids and Derivatives	2	C00346; C05678	C2H8NO4P	0.191844	0.0274118	0.191975	0.0129692	0.19839	0.000780329	0.338428	9.06945e-05	A1;hive	2.33996	1.46027e-06	-	-	-	-	-	-	-	-	-	-	-	-	1.47771	0.00662111	-	-	-0.499415	2.02605e-08	yes
119	140.072	4845.53	yes	substrate	no	yes	Ethosuximide	C07505	no	no	Pyrrolidines	4	C07505; C08287; C10128; C16821	C7H11NO2	-0.673986	0.00194069	-0.557134	0.00139106	-0.609223	2.91424e-06	-0.930214	5.02171e-05	CL;F4;F5;Fp;hive	-	-	-	-	-1.30341	0.000171742	-1.48817	0.00176714	1.30555	0.0100155	-1.2736	0.000992596	-	-	-1.93354	1.5234e-05	-	-	1.09863	6.27404e-10	no
120	140.108	1955.74	yes	substrate	no	yes	Tropine	C00729	no	no	Alkaloids	7	C00729; C02066; C06179; C06182; C10864; C11359; C12440	C8H15NO	-0.888821	1.32819e-05	-0.72615	2.955e-05	-0.782707	4.24868e-10	-0.822414	0.00054215	A1;CL;F4;Fp;G;hive;S	-1.79581	2.16707e-05	-	-	-2.07816	2.18458e-10	-2.48926	4.24233e-09	-	-	-2.04324	4.78694e-09	-1.53475	0.00043508	-2.2832	5.57389e-08	-1.49078	1.84998e-05	0.2584	0.000978635	no
121	141.055	4243.4	yes	product	no	yes	4-Oxocyclohexanecarboxylate	C03767	no	no	-	1	C03767	C7H10O3	0.269518	0.00316061	0.388457	3.93499e-06	0.34582	6.0721e-09	1.33576	0.00216963	CL;hive	-	-	-	-	0.768324	1.1834e-05	-	-	-	-	-	-	-	-	3.78972	1.53221e-11	-	-	0.00419961	0.934573	no
122	141.067	8178.94	no	no	no	yes	Ectoine	C06231	no	no	-	1	C06231	C6H10N2O2	-0.0118509	0.914165	-0.0349093	0.520257	-0.0317099	0.519841	-0.557862	3.75588e-05	B;G;hive	-	-	1.42644	0.000221266	-	-	-	-	-	-	-	-	1.90789	3.57614e-07	-1.95525	1.85467e-07	-	-	0.724964	4.16121e-06	no
123	141.092	9433.9	yes	product	no	no	Cycloheptanecarboxylic acid	C12104	no	no	-	7	C12104; C12297; C16648; C16653; C16654; C19318; C19757	C8H14O2	0.667536	0.00226034	0.615903	1.41089e-06	0.628016	4.72391e-09	0.652566	0.0234399	B;CL;hive	-	-	1.32334	0.000884257	2.05182	2.30597e-11	-	-	-	-	-	-	-	-	2.2038	7.11248e-09	-	-	-2.29454	5.75713e-05	no
124	142.051	31563.2	no	no	no	yes	2-Hydroxymethylclavam	C17357	yes	no	-	1	C17357	C6H9NO3	0.678695	0.0141865	0.345045	0.0569187	0.461891	0.00233807	0.905937	0.00146671	F4;hive	-	-	-	-	-	-	1.23777	0.0435926	-	-	-	-	-	-	2.20429	5.95896e-06	-	-	2.66575	2.39331e-11	yes
125	143.035	83504.4	no	no	no	no	2,3-Dimethylmaleate	C00922	yes	no	Fatty Acids and Conjugates	7	C00922; C01757; C02295; C02930; C19821; C19822; C19826	C6H8O4	0.156053	0.362053	-0.228947	0.174336	-0.0945979	0.467939	-0.289263	0.159836	F5	-	-	-	-	-	-	-	-	-1.8182	0.0121257	-	-	-	-	-	-	-	-	3.89857	2.62835e-11	yes
126	143.046	12308.3	no	no	no	yes	N-Nitrosoproline	C19485	yes	no	Pyrrolidines	1	C19485	C5H8N2O3	1.48893	0.0109897	0.457692	5.24526e-05	0.886941	0.00117523	0.658974	0.0017125	B;CL;hive	-	-	1.81871	7.91892e-06	1.3809	8.26844e-06	-	-	-	-	-	-	-	-	2.14142	1.32401e-07	-	-	3.33755	1.91489e-11	yes
127	143.071	22333.5	yes	product	no	yes	trans-4-Hydroxycyclohexanecarboxylate	C04404	no	no	-	2	C04404; C16590	C7H12O3	0.819215	0.000695807	1.30191	0.000178601	1.14114	2.2869e-06	6.40887	0.00113624	hive	-	-	-	-	-	-	-	-	-	-	-	-	-	-	3.87857	1.53e-11	-	-	0.250448	0.00262068	no
128	143.108	36323	yes	product	no	no	Octanoic acid	C06423	no	no	Fatty Acids and Conjugates	2	C06423; C07185	C8H16O2	0.444222	0.00695872	0.517151	5.28955e-06	0.503263	5.94805e-08	-0.0780784	0.453782	CL;S	-	-	-	-	1.74224	8.36312e-09	-	-	-	-	-	-	-	-	-	-	0.912399	0.0168359	0.739285	2.53955e-09	yes
129	144.045	315454	no	no	no	yes	3-Methyleneoxindole	C02796	yes	no	-	7	C02796; C06324; C06338; C06343; C06415; C08493; C19434	C9H7NO	0.291455	0.359263	0.634146	0.00437024	0.481066	0.00445839	2.29159	0.00214124	CL;F5;Fp;G;hive;S	-	-	-	-	0.499447	0.0341274	-	-	0.832324	0.00202925	0.773655	0.000293923	1.78469	2.42392e-11	3.52491	1.53221e-11	1.02207	7.46163e-07	2.09465	3.6012e-06	yes
130	144.066	58788	no	no	no	no	4-Acetamidobutanoate	C02946	yes	no	Fatty Acids and Conjugates	5	C02946; C03239; C03656; C04076; C05825	C6H11NO3	-0.767061	0.021214	0.543412	0.10394	0.0725059	0.769551	-0.0858696	0.693185		-	-	-	-	-	-	-	-	-	-	-	-	-	-	-	-	-	-	3.84749	8.66093e-13	yes
131	145.014	36483.1	yes	substrate	no	no	alpha-ketoglutarate	C00026	no	no	Keto-Acids and Derivatives	5	C00026; C03716; C05406; C06030; C06316	C5H6O5	-0.668802	0.00482639	-1.09105	1.66196e-08	-0.936118	1.21203e-11	-0.18975	0.291822	A1;B;CL;F4;F5;G;S	-1.68048	1.85918e-08	-0.955313	0.00319558	-1.75925	1.56976e-11	-1.05629	0.000708326	-1.42756	1.55616e-06	-	-	1.37521	3.82705e-06	-	-	-1.62035	1.3465e-10	1.07212	1.18278e-06	no
132	145.03	14002.5	no	no	no	yes	Coumarin	C05851	no	no	Pyrans	1	C05851	C9H6O2	-0.115348	0.375067	-0.152862	0.134408	-0.139452	0.0591402	0.298295	0.00828639		-	-	-	-	-	-	-	-	-	-	-	-	-	-	-	-	-	-	1.25026	7.02147e-10	no
133	145.041	31616.7	no	no	no	yes	1(2H)-Phthalazinone	C14473	no	no	-	1	C14473	C8H6N2O	0.185482	0.208113	0.217901	0.0848588	0.203743	0.0226892	0.832871	0.00020578	hive	-	-	-	-	-	-	-	-	-	-	-	-	-	-	2.86783	1.43e-09	-	-	1.12228	7.83408e-13	yes
134	145.05	117097	no	no	no	yes	2-Aceto-2-hydroxybutanoate	C00659	no	no	-	11	C00659; C00772; C00966; C01053; C04237; C06006; C06104; C06762; C13811; C14463; C16272	C6H10O4; C6H10O4.	0.374819	0.0440736	0.567784	4.26699e-05	0.503278	1.72863e-06	1.62485	0.000774403	CL;Fp;G;hive	-	-	-	-	0.862886	4.02371e-05	-	-	-	-	0.597059	0.0297798	0.917487	0.00167488	3.72911	1.53221e-11	-	-	1.40417	5.78213e-12	yes
135	145.062	1.31379e+06	no	no	no	yes	L-Glutamine	C00064	no	no	Amino Acids and Derivatives	5	C00064; C00303; C00819; C05100; C16673	C5H10N2O3	-0.42443	0.371276	-1.0413	0.0452888	-0.805969	0.0168288	-1.67287	0.00913619		-	-	-	-	-	-	-	-	-	-	-	-	-	-	-	-	-	-	1.34414	1.60736e-09	yes
136	145.098	368880	no	no	no	yes	L-Lysine	C00047	no	no	Amino Acids and Derivatives	7	C00047; C00739; C01142; C01186; C05161; C16440; C20277	C6H14N2O2	0.198684	0.363311	0.761124	2.70761e-05	0.56326	3.12403e-05	-1.38302	6.61023e-07	CL;F5;Fp;hive	-	-	-	-	1.41296	2.19345e-08	-	-	2.41827	1.84927e-11	0.816755	0.00781943	-	-	-1.25388	0.000230192	-	-	1.90661	7.89917e-11	yes
137	146.046	493088	no	no	no	yes	L-Glutamate	C00025	yes	no	-	10	C00025; C00217; C00302; C00979; C03618; C03790; C05574; C05938; C05941; C12269	C5H9NO4	0.269949	0.299074	0.0774803	0.628576	0.144954	0.237338	-0.735901	0.0033077	A1;S	-1.2869	0.0296353	-	-	-	-	-	-	-	-	-	-	-	-	-	-	-1.55555	0.000141967	2.37772	7.70188e-11	yes
138	146.064	92004	yes	substrate	no	yes	5-Methylthiopentanaldoxime	C17245	no	no	-	1	C17245	C6H13NOS	-1.04925	0.00163246	-1.18104	0.000135638	-1.14435	2.48007e-07	-1.20642	0.000134598	CL;F4;hive;S	-	-	-	-	-1.52576	7.5718e-06	-1.77423	9.8225e-05	-	-	-	-	-	-	-1.54676	0.00106304	-0.998083	0.0240815	1.66236	1.7544e-10	yes
139	147.03	125136	yes	product	yes	no	2-Hydroxyglutarate	C00652	yes	based on Zheng et al. 2017	-	17	C00652; C00684; C00815; C01087; C01114; C02266; C02612; C02614; C02630; C02753; C02994; C03196; C03826; C05405; C06029; C06031; C06032	C5H8O5	2.34005	0.0022971	2.20554	2.44349e-06	2.24459	7.98699e-09	2.34487	0.0127524	CL;F4;F5;hive	-	-	-	-	1.61948	1.03698e-08	2.45293	1.18948e-10	1.43151	0.000156546	-	-	-	-	1.82914	7.16622e-07	-	-	2.69654	2.10113e-13	yes
140	147.045	47075	yes	product	no	no	trans-Cinnamate	C00423	yes	no	Cinnamic Acid Derivatives	7	C00423; C02274; C05608; C07720; C07728; C10438; C17268	C9H8O2	0.447838	0.00194779	0.526093	1.62295e-06	0.491051	9.17747e-10	0.33023	0.102074	CL;F4;G	-	-	-	-	1.02801	0.00391807	2.47216	8.9865e-09	-	-	-	-	1.849	1.68762e-05	-	-	-	-	2.34099	4.60794e-17	yes
141	147.066	50942.1	no	no	no	yes	(R)-Mevalonate	C00418	no	no	Hydroxy Acids and Derivatives	7	C00418; C00522; C02104; C03348; C04104; C06007; C06471	C6H12O4	0.936714	0.299074	0.765452	0.114395	0.832124	0.0374754	-0.290759	0.00266737	F4	-	-	-	-	-	-	1.66265	0.0206986	-	-	-	-	-	-	-	-	-	-	1.50035	1.64905e-08	yes
142	148.041	31774.3	no	no	no	yes	4-Hydroxymandelonitrile	C00650	no	no	-	7	C00650; C02775; C03574; C03742; C05578; C09957; C11130	C8H7NO2	0.387973	0.0177746	0.243194	0.000773433	0.290635	9.88829e-05	0.300514	0.00409428	A1;G	2.82376	1.857e-09	-	-	-	-	-	-	-	-	-	-	1.22292	0.0316	-	-	-	-	1.96031	1.68166e-14	yes
143	148.062	22048	no	no	no	yes	N,N-Dihydroxy-L-valine	C20314	no	no	-	1	C20314	C5H11NO4	-0.3884	0.150216	-0.10833	0.41227	-0.185311	0.11133	-0.794831	5.07671e-05	Fp;hive	-	-	-	-	-	-	-	-	-	-	1.22417	0.0112901	-	-	-1.82324	0.000656889	-	-	1.88097	5.62063e-10	yes
144	148.077	4768.58	no	no	no	yes	D-Cathinone	C08301	no	no	Alkaloids	2	C08301; C17236	C9H11NO	0.187252	0.302879	0.214945	0.0331636	0.1962	0.0250113	1.94858	0.00184151	hive	-	-	-	-	-	-	-	-	-	-	-	-	-	-	3.91433	1.53e-11	-	-	2.82376	1.77334e-09	no
145	148.991	253796	no	no	no	no	Thiodiacetic acid	C14872	yes	no	Carboxylic Acids and Derivatives	1	C14872	C4H6O4S	0.674906	0.0684648	-0.524071	0.0760694	-0.161613	0.521923	-0.415672	0.206772	A1;Fp;G	-1.76353	0.0132875	-	-	-	-	-	-	-	-	-1.38904	0.0216369	-1.7507	0.0144191	-	-	-	-	3.93143	1.16706e-11	yes
146	149.045	54520.6	yes	product	no	no	Xylose	C00121	yes	based on Zheng et al. 2017	Monosaccharides	26	C00121; C00181; C00216; C00259; C00309; C00310; C00312; C00476; C00508; C01394; C01488; C01508; C01510; C02096; C02204; C02205; C02479; C02604; C05052; C06115; C08346; C08353; C08354; C11476; C16639; C20569	C5H10O5	0.459079	0.00267267	0.354189	0.000228042	0.394994	6.79037e-08	0.164496	0.430209	B	-	-	2.87321	1.34e-08	-	-	-	-	-	-	-	-	-	-	-	-	-	-	4.74487	6.8567e-12	yes
147	149.097	5902.61	no	no	no	yes	(-)-Carvone	C01767	no	no	Prenol Lipids	27	C01767; C01868; C01951; C02289; C02485; C02576; C06576; C09840; C09843; C09868; C09884; C09908; C09911; C09913; C11383; C11394; C11939; C14130; C14138; C14139; C14188; C14200; C14464; C14741; C16955; C17062; C18025	C10H14O	0.121394	0.473662	0.312484	0.00179676	0.242014	0.00315839	2.12297	0.00194292	hive	-	-	-	-	-	-	-	-	-	-	-	-	-	-	3.86168	1.53e-11	-	-	-0.661261	1.03284e-08	no
148	150.042	11367.2	no	no	no	yes	Guanine	C00242	yes	no	Imidazopyrimidines	1	C00242	C5H5N5O	0.401315	0.377559	0.4811	0.0151541	0.459948	0.0101748	0.79875	0.00685906	CL;F4;G;hive	-	-	-	-	0.815355	0.0334095	2.73274	9.64879e-11	-	-	-	-	1.46911	0.000582892	1.52354	0.000313973	-	-	4.3558	1.95844e-08	yes
149	150.056	9579.63	yes	product	no	yes	Methyl-4-aminobenzoate	C02709	yes	yes	-	12	C02709; C03005; C03522; C04350; C04353; C06804; C07301; C16571; C17755; C17756; C18623; C20634	C8H9NO2	0.252606	0.00973391	0.364915	1.61474e-06	0.322068	1.79856e-09	0.639356	3.0495e-05	B;CL;F5;Fp;G;hive	-	-	1.33986	0.00016924	1.70907	2.67333e-10	-	-	0.983919	0.0151235	1.07159	0.000289703	1.72512	6.57067e-07	3.31138	1.53325e-11	-	-	2.03479	1.35327e-13	yes
150	151.026	48177.3	no	no	no	no	Xanthine	C00385	yes	no	Imidazopyrimidines	2	C00385; C07599	C5H4N4O2	0.483179	0.0193193	0.45913	0.0134091	0.477591	0.000530946	-0.321574	0.202346	Fp	-	-	-	-	-	-	-	-	-	-	1.21387	0.0321843	-	-	-	-	-	-	3.78239	4.67547e-12	yes
151	151.04	34227.4	no	no	no	no	4-Hydroxyphenylacetate	C00642	no	no	Phenols and Derivatives	22	C00642; C00755; C01983; C01984; C02181; C02519; C02639; C02657; C03663; C04043; C05593; C05852; C10675; C10804; C12064; C12305; C13635; C13636; C14088; C14103; C14108; C17900	C8H8O3	0.843909	0.0174104	1.18756	3.71996e-07	1.07423	7.95652e-09	0.835171	0.0173828	CL;F4;F5;hive	-	-	-	-	2.54692	1.53241e-11	0.886793	0.018403	1.03058	0.00291671	-	-	-	-	1.56296	9.1266e-07	-	-	0.797089	7.83408e-13	yes
152	151.061	67732.8	no	no	no	yes	Xylitol	C00379	yes	no	Sugar Alcohols	5	C00379; C00474; C00532; C01569; C01904	C5H12O5	0.508436	0.00273796	0.276352	0.0650696	0.360982	0.00115904	-1.96577	1.0488e-06	F4;hive	-	-	-	-	-	-	1.42428	0.00103252	-	-	-	-	-	-	-2.22487	6.27406e-08	-	-	3.37346	1.88123e-08	yes
153	151.076	15236.4	no	no	no	no	3-Isopropylcatechol	C01014	no	no	-	1	C01014	C9H12O2	0.602138	0.0548766	0.598826	5.49592e-06	0.597305	2.12282e-06	0.982232	0.0200516	CL;F5;hive	-	-	-	-	1.28557	1.50953e-06	-	-	2.56156	1.90247e-11	-	-	-	-	2.43758	3.78354e-11	-	-	0.255775	9.34834e-05	no
154	151.087	6283.17	no	no	no	no	4-(Hydroxylamino)-N,N-dimethylaniline	C19681	no	no	-	1	C19681	C8H12N2O	0.495922	0.0214512	0.571579	1.66196e-08	0.533356	2.3696e-08	3.02921	0.0127297	hive	-	-	-	-	-	-	-	-	-	-	-	-	-	-	3.6993	1.53e-11	-	-	1.63021	4.85411e-12	no
155	152.019	3370.56	no	no	no	no	Thiobenzamide S-oxide	C16283	no	no	-	1	C16283	C7H7NOS	0.15666	0.120094	-0.0178076	0.908605	0.0468671	0.654677	-0.360231	0.0690427		-	-	-	-	-	-	-	-	-	-	-	-	-	-	-	-	-	-	1.61226	4.34191e-11	no
156	152.046	4239.12	yes	product	no	no	1,2-Diamino-4-nitrobenzene	C19384	no	no	-	2	C19384; C19385	C6H7N3O2	0.595881	0.00595818	0.815888	3.71539e-07	0.746865	3.50929e-09	0.461311	0.0595619	CL;F4;F5;hive	-	-	-	-	2.49622	1.53889e-11	1.06655	0.0230467	1.32591	0.00150119	-	-	-	-	1.23695	0.0040271	-	-	0.986223	1.1446e-11	no
157	152.072	9327.36	no	no	no	no	Dopamine	C03758	no	no	Phenols and Derivatives	3	C03758; C04227; C16666	C8H11NO2	0.951585	0.022289	0.691217	0.000113689	0.783146	7.8533e-06	0.938852	0.0218081	CL;hive	-	-	-	-	1.86442	2.6166e-08	-	-	-	-	-	-	-	-	2.78157	5.13394e-10	-	-	2.15241	2.10223e-12	no
158	152.083	18885.3	no	no	no	no	4-(beta-Acetylaminoethyl)imidazole	C05135	no	no	Azoles	2	C05135; C16399	C7H11N3O	0.572858	0.0638936	0.487256	0.0700104	0.534432	0.0143077	0.120316	0.677668	F4	-	-	-	-	-	-	1.71418	0.0169818	-	-	-	-	-	-	-	-	-	-	2.05376	1.66634e-11	no
159	152.996	73042.5	yes	product	no	no	Propanoyl phosphate	C02876	yes	no	-	3	C02876; C03505; C03947	C3H7O5P	1.93402	0.00507707	1.58487	3.71996e-07	1.70858	1.03084e-09	-0.204662	0.556443	CL;F5	-	-	-	-	2.00195	1.53234e-11	-	-	2.23192	1.53492e-11	-	-	-	-	-	-	-	-	4.69993	6.51742e-11	yes
160	153.019	70222.1	no	no	no	no	2,3-Dihydroxybenzoate	C00196	yes	no	Benzoic Acid and Derivatives	4	C00196; C00230; C00628; C16748	C7H6O4	0.560972	0.000170735	-1.19703	0.31574	-0.761222	0.375761	-1.56638	0.221246		-	-	-	-	-	-	-	-	-	-	-	-	-	-	-	-	-	-	2.96265	1.44229e-11	yes
161	153.055	27859.5	yes	product	no	no	Vanillyl alcohol	C06317	no	no	Phenols and Derivatives	2	C06317; C10787	C8H10O3	0.370362	0.00344183	0.595455	7.05237e-05	0.498014	1.15794e-06	0.00259302	0.988513	B;CL;F5	-	-	1.8973	0.000153383	1.78734	1.53196e-06	-	-	1.51852	0.00504949	-	-	-	-	-	-	-	-	1.63182	1.24362e-10	yes
162	153.092	9592.65	no	no	no	yes	Boschnialactone	C09772	no	no	-	1	C09772	C9H14O2	-0.259412	0.00975655	-0.37486	0.0195304	-0.330912	0.00151133	0.980636	0.00250129	A1;B;F5;hive	-1.13274	0.000975608	0.827064	0.0444805	-	-	-	-	-1.34332	4.57249e-05	-	-	-	-	2.55159	1.56096e-11	-	-	0.261521	0.000954487	no
163	154.062	695650	no	no	no	yes	L-Histidine	C00135	yes	no	Amino Acids and Derivatives	4	C00135; C00768; C01162; C06419	C6H9N3O2	0.345894	0.120946	0.317812	0.0344471	0.311918	0.0172921	-3.08817	6.98247e-08	F5;hive	-	-	-	-	-	-	-	-	1.20468	0.0142494	-	-	-	-	-2.36616	2.4923e-08	-	-	5.15489	1.42293e-12	yes
164	154.087	17494.8	no	no	no	yes	Retronecine	C06177	yes	no	Alkaloids	4	C06177; C10129; C10321; C10866	C8H13NO2	0.278641	0.186309	0.42401	0.00575824	0.349815	0.00430636	3.03603	0.000170224	hive	-	-	-	-	-	-	-	-	-	-	-	-	-	-	3.95003	1.53e-11	-	-	4.14139	3.28658e-09	yes
165	154.998	17909.8	no	no	no	yes	2,5-Furandicarboxylate	C20450	yes	no	-	1	C20450	C6H4O5	-0.685028	0.0133719	-0.728684	0.000102479	-0.729825	3.98888e-06	-0.934073	0.00464736	CL;Fp;hive;S	-	-	-	-	-1.26105	0.0015539	-	-	-	-	-1.20712	0.00827843	-	-	-1.5157	0.00540548	-1.64921	5.86476e-05	3.15999	5.0214e-13	yes
166	155.009	5162.07	yes	substrate	yes	yes	Orotate	C00295	no	no	Amino Acids and Derivatives	2	C00295; C03030	C5H4N2O4	-1.64584	0.00321859	-1.74313	7.52662e-07	-1.70484	1.6071e-09	-1.96609	6.04874e-07	A1;B;CL;F5;G;hive;S	-1.57398	0.000262181	-1.05514	0.0472697	-2.15218	6.80048e-11	-	-	-1.64492	0.000116824	-	-	-1.26345	0.00708163	-2.28346	4.96654e-08	-2.0071	7.34674e-09	1.62956	1.04103e-12	no
167	155.035	6826.08	yes	product	no	no	3-Methyl-cis,cis-muconate	C04112	yes	synonym	-	10	C04112; C04171; C04558; C04559; C04634; C06210; C06321; C06760; C18311; C20710	C7H8O4	0.383805	0.00756464	0.353401	0.000134891	0.364118	3.00499e-07	0.639495	0.0174485	A1;CL;F5;hive	2.99525	2.42356e-11	-	-	0.91522	0.0137945	-	-	1.29909	0.00548263	-	-	-	-	1.83917	1.4012e-05	-	-	2.42067	1.10099e-15	yes
168	155.046	13289.3	yes	product	yes	no	4-Imidazolone-5-propanoate	C03680	yes	no	Azoles	4	C03680; C03817; C05568; C19481	C6H8N2O3	2.08772	0.000678558	1.9934	4.90102e-05	2.02663	2.09869e-08	1.02864	0.0158495	CL;F5	-	-	-	-	1.93411	3.48285e-10	-	-	2.54795	3.24953e-10	-	-	-	-	-	-	-	-	3.23757	6.98446e-13	yes
169	155.108	156757	yes	substrate	yes	yes	Nonane-4,6-dione	C02445	yes	no	-	3	C02445; C08471; C08501	C9H16O2	-2.82726	0.000671942	-3.05805	5.8317e-05	-2.97235	7.9315e-08	-2.10506	0.000160338	CL;F5;hive	-	-	-	-	-1.59452	1.61197e-05	-	-	-1.68898	0.000911336	-	-	-	-	-1.39089	0.0126224	-	-	2.46681	9.62335e-10	yes
170	155.143	1416.57	no	no	no	yes	(-)-Menthol	C00400	no	no	Prenol Lipids	5	C00400; C00553; C09849; C11386; C12307	C10H20O	0.642605	0.0277046	-0.345585	0.00382102	0.152596	0.627606	-0.537615	0.000625556	G	-	-	-	-	-	-	-	-	-	-	-	-	1.5337	0.0426142	-	-	-	-	-0.370864	8.80933e-05	no
171	156.03	4424.04	yes	product	no	no	2-Aminomuconate	C02220	no	no	Amino Acids and Derivatives	3	C02220; C14293; C17358	C6H7NO4	0.30804	0.000806465	0.398098	2.4993e-05	0.368521	3.90309e-08	0.454191	0.0266295	A1;B;CL;hive	1.33516	0.0201178	1.59681	0.00218815	1.93491	1.46794e-07	-	-	-	-	-	-	-	-	2.25303	3.25933e-06	-	-	2.72437	1.61315e-11	no
172	156.066	19796.4	no	no	no	yes	Paramethadione	C07411	yes	no	-	4	C07411; C17361; C17724; C20828	C7H11NO3	-0.249473	0.00831749	-0.246729	0.0349905	-0.253947	0.00103692	-1.01475	2.17925e-06	hive	-	-	-	-	-	-	-	-	-	-	-	-	-	-	-2.52689	4.89e-07	-	-	4.75149	2.63547e-11	yes
173	156.103	3238.28	yes	substrate	no	yes	Homostachydrine	C08283	no	no	Piperidines	3	C08283; C10155; C12535	C8H15NO2	-1.03985	5.6923e-07	-1.18089	3.97259e-06	-1.12932	6.35046e-11	-1.3524	1.62411e-06	CL;F4;hive	-	-	-	-	-2.26383	2.59063e-10	-1.22385	0.0287891	-	-	-	-	-	-	-2.46409	8.44253e-08	-	-	1.17847	3.58455e-11	no
174	157.014	34762.4	yes	product	yes	no	2-Maleylacetate	C02222	yes	no	-	5	C02222; C02501; C03453; C03676; C06035	C6H6O5	4.12045	0.00321036	3.65523	5.36641e-05	3.82823	1.45029e-07	3.19076	0.0111553	CL;F5;hive	-	-	-	-	2.04228	1.54202e-11	-	-	2.26885	3.77191e-11	-	-	-	-	1.43164	1.34701e-05	-	-	2.35716	7.71562e-14	yes
175	157.037	4278.24	yes	product	no	no	Allantoin	C01551	no	no	Imidazolidines	3	C01551; C02348; C02350	C4H6N4O3	0.730604	0.00192082	0.74297	1.68831e-06	0.728285	3.51947e-09	0.913058	0.0978274	CL;hive	-	-	-	-	1.72793	1.3445e-06	-	-	-	-	-	-	-	-	2.26511	1.44054e-06	-	-	1.36101	1.15011e-07	no
176	157.051	8118.98	yes	product	no	no	2-Isopropylmaleate	C02631	no	no	Fatty Acids and Conjugates	4	C02631; C04670; C04815; C05126	C7H10O4	0.773238	0.000258461	1.14657	3.71996e-07	1.03182	3.30316e-09	3.68361	0.129609	hive	-	-	-	-	-	-	-	-	-	-	-	-	-	-	2.84935	3.98e-08	-	-	0.783882	3.76734e-10	no
177	157.087	35360.1	yes	product	yes	yes	Ethyl 3-oxohexanoate	C02975	no	no	Keto-Acids and Derivatives	3	C02975; C16652; C16655	C8H14O3	2.15085	6.88962e-05	2.26709	1.198e-06	2.22755	5.34378e-11	2.53429	0.0033077	B;CL;F4;hive	-	-	1.47397	4.95811e-08	2.14733	1.53245e-11	1.01896	0.000248727	-	-	-	-	-	-	2.69882	1.53263e-11	-	-	0.219734	0.000710593	yes
178	157.123	43725.4	no	no	no	no	Nonanoic acid	C01601	no	no	Fatty Acids and Conjugates	1	C01601	C9H18O2	0.303349	0.0190195	0.104074	0.314529	0.179166	0.0313903	0.487669	0.0283939	hive	-	-	-	-	-	-	-	-	-	-	-	-	-	-	1.87951	0.000603043	-	-	-1.87425	1.79363e-06	yes
179	158.046	8449.87	yes	product	no	no	4-Methylene-L-glutamate	C00651	no	no	Amino Acids and Derivatives	2	C00651; C03623	C6H9NO4	0.360327	0.00926114	0.507359	2.24218e-05	0.460135	1.34905e-07	0.354466	0.208674	CL	-	-	-	-	1.97407	2.39e-06	-	-	-	-	-	-	-	-	-	-	-	-	2.41348	6.08272e-19	no
180	158.061	9872.63	no	no	no	yes	Indole-3-acetaldehyde	C00637	no	no	Indoles	4	C00637; C06345; C10663; C14789	C10H9NO	-0.0902505	0.363229	0.173536	0.152083	0.0844929	0.324003	0.484717	0.00044857	F4;hive	-	-	-	-	-	-	2.18277	2.12021e-05	-	-	-	-	-	-	1.43736	0.0158514	-	-	0.819502	3.35736e-06	no
181	158.082	31897.6	no	no	no	yes	5-Acetamidopentanoate	C03087	yes	no	Fatty Acids and Conjugates	4	C03087; C08269; C10151; C10850	C7H13NO3	-0.364385	0.119755	-0.23746	0.252556	-0.298797	0.0463105	-1.20343	5.69253e-05	F5;hive;S	-	-	-	-	-	-	-	-	1.29602	0.0218902	-	-	-	-	-1.48481	0.0044338	-1.149	0.00974133	2.18241	3.12747e-11	yes
182	159.032	37916.7	no	no	no	yes	2-Oxoadipate	C00322	no	no	Keto-Acids and Derivatives	6	C00322; C00846; C04287; C06891; C16159; C20781	C6H8O5	-0.155008	0.0413305	-0.258351	0.0103774	-0.216359	0.00290581	1.46077	0.000601971	A1;F4;F5;hive	1.0547	8.83625e-07	-	-	-	-	-0.560352	0.0350862	-0.641797	0.00817027	-	-	-	-	3.21971	1.53221e-11	-	-	3.69217	9.0799e-13	no
183	159.066	39869	yes	product	yes	no	Pimelate	C02656	no	no	Carboxylic Acids and Derivatives	3	C02656; C04687; C16657	C7H12O4	2.46168	0.000150447	3.62651	1.68831e-06	3.27436	5.55761e-08	4.58108	0.0109845	CL;F5;hive	-	-	-	-	1.57535	1.59704e-11	-	-	0.839528	0.00514976	-	-	-	-	3.18323	1.53221e-11	-	-	0.463623	0.0347047	yes
184	159.077	16287.8	yes	product	yes	yes	D-Alanyl-D-alanine	C00993	no	no	Peptides	5	C00993; C03153; C06442; C10996; C19929	C6H12N2O3	1.41057	0.000416225	1.91951	3.74086e-07	1.75769	1.03084e-09	2.15435	0.00246156	B;CL;F5;hive	-	-	0.572893	0.0282958	2.2378	1.53221e-11	-	-	1.08156	4.59601e-07	-	-	-	-	2.77555	1.53221e-11	-	-	1.87788	5.9677e-13	yes
185	159.103	246148	no	no	no	yes	Ethyl (R)-3-hydroxyhexanoate	C03864	no	no	-	7	C03864; C03865; C16649; C16650; C16651; C17527; C20793	C8H16O3	0.177581	0.426478	0.422691	0.0741237	0.364419	0.0463105	-0.843739	5.8708e-05	F4;Fp	-	-	-	-	-	-	1.60918	0.000375122	-	-	1.62671	6.2951e-06	-	-	-	-	-	-	1.15551	2.99841e-10	yes
186	160.04	148259	no	no	no	yes	4,8-Dihydroxyquinoline	C05637	no	no	-	7	C05637; C05639; C06330; C06342; C11503; C16716; C19837	C9H7NO2	0.293387	0.0443798	0.556516	6.94716e-05	0.46752	3.74541e-06	5.34485	0.000394996	hive	-	-	-	-	-	-	-	-	-	-	-	-	-	-	3.91937	1.53e-11	-	-	0.0607113	0.809849	yes
187	160.061	23389.9	yes	product	no	yes	L-2-Aminoadipate	C00956	yes	no	Amino Acids and Derivatives	9	C00956; C01046; C01077; C02207; C03210; C05016; C06234; C17581; C19694	C6H11NO4	0.624725	0.000616787	0.743148	3.89161e-06	0.710852	7.72888e-09	1.98997	0.000824984	CL;F4;hive	-	-	-	-	0.741219	1.3575e-05	2.38207	1.5323e-11	-	-	-	-	-	-	3.26958	1.53221e-11	-	-	3.27532	4.67279e-13	yes
188	160.077	5283.25	yes	product	no	yes	Indole-3-ethanol	C00955	no	no	Indoles	2	C00955; C09915	C10H11NO	0.501066	0.000903578	0.811065	1.06032e-07	0.708324	7.96821e-10	2.33953	0.00294377	hive;S	-	-	-	-	-	-	-	-	-	-	-	-	-	-	3.1324	1.91446e-11	1.18961	0.00171872	2.25842	1.36771e-11	no
189	161.045	346621	yes	substrate	no	yes	Anhydrogalactose	C00478	yes	based on Zheng et al. 2017	-	19	C00478; C01088; C01989; C02360; C02488; C02991; C03652; C03761; C03827; C03979; C06158; C06159; C06474; C06478; C06485; C11592; C16390; C17209; C18028	C6H10O5	-0.703639	0.00198627	-0.811429	1.99472e-08	-0.774857	5.74015e-12	-0.583053	0.000220922	B;CL;F5;hive;S	-	-	0.604441	0.0194659	-1.51705	1.53436e-11	-	-	0.828984	0.000227559	-	-	-	-	-1.17239	8.16666e-08	-2.05323	1.53223e-11	4.24716	1.21197e-11	yes
190	161.969	2255.31	no	no	no	no	2-Thiophenesulfonamide	C14764	no	no	-	1	C14764	C4H5NO2S2	0.0574885	0.595227	-0.149275	0.174336	-0.0725188	0.402723	-0.186872	0.299558	G	-	-	-	-	-	-	-	-	-	-	-	-	-1.68624	0.0342943	-	-	-	-	-0.530031	0.0358222	no
191	162.002	3482.26	no	no	no	no	Benzoyl isothiocyanate	C20170	no	no	-	1	C20170	C8H5NOS	0.470266	0.049641	0.157018	0.473993	0.268417	0.0813027	-0.237613	0.27907		-	-	-	-	-	-	-	-	-	-	-	-	-	-	-	-	-	-	1.12884	2.47881e-05	no
192	162.056	28123	no	no	no	no	3-Methyldioxyindole	C05834	yes	no	Not Available	2	C05834; C19567	C9H9NO2	0.209102	0.0285663	0.261843	0.00411459	0.242352	0.000120946	0.125382	0.32059	CL;G	-	-	-	-	1.19472	0.0151599	-	-	-	-	-	-	1.78292	0.00314864	-	-	-	-	2.32717	3.80088e-12	yes
193	162.078	8612.81	no	no	no	no	Deoxymannojirimycin	C10141	no	no	Alkaloids	7	C10141; C10143; C15478; C15479; C16843; C17580; C20311	C6H13NO4	0.0678029	0.537599	0.13695	0.0360607	0.110067	0.0343634	-0.0495145	0.769642		-	-	-	-	-	-	-	-	-	-	-	-	-	-	-	-	-	-	0.927838	1.37471e-08	no
194	163.04	66720.6	yes	substrate	no	yes	p-coumarate	C00166	no	p-coumarate is known to be abundant in pollen	Benzyl Alcohols and Derivatives	9	C00166; C00811; C01772; C02763; C05838; C06738; C07114; C10945; C12621	C9H8O3	-1.91719	1.26736e-05	-1.53292	1.55369e-05	-1.69095	7.95915e-10	-1.5478	1.16995e-05	CL;F5;G;hive;S	-	-	-	-	-1.43446	4.13267e-07	-	-	-1.57239	2.95877e-05	-	-	1.4463	0.000153374	-1.44223	0.000161586	-1.28282	3.63829e-05	-0.160644	0.0221912	yes
195	163.061	122611	no	no	no	no	L-Rhamnose	C00507	yes	no	Monosaccharides	20	C00507; C00586; C00861; C01018; C01019; C01684; C01721; C02095; C02338; C02431; C02476; C02522; C02781; C07326; C08258; C08259; C08352; C16538; C20835; C20836	C6H12O5	0.0688919	0.62499	0.6353	0.00456175	0.471716	0.00558089	-0.497184	0.101503	A1;CL;F4;S	-1.29373	0.00782194	-	-	1.20952	0.000382695	1.45903	0.0015246	-	-	-	-	-	-	-	-	1.35097	0.000223147	2.68004	1.97457e-12	yes
196	164.039	384768	no	no	no	yes	L-Methionine S-oxide	C02989	no	no	-	3	C02989; C15998; C15999	C5H11NO3S	0.0323208	0.915523	-0.360505	0.0843523	-0.214246	0.20642	-0.937703	0.000774403	A1;hive	-1.80436	0.00242855	-	-	-	-	-	-	-	-	-	-	-	-	-1.40008	0.0444914	-	-	-0.39662	0.0123291	yes
197	164.058	48253.7	no	no	no	no	3-Methylguanine	C02230	yes	no	Imidazopyrimidines	2	C02230; C02242	C6H7N5O	-0.0653071	0.781782	0.175964	0.307228	0.103438	0.428413	-0.356783	0.0318591		-	-	-	-	-	-	-	-	-	-	-	-	-	-	-	-	-	-	2.67994	2.46166e-10	yes
198	164.071	323461	no	no	no	no	L-Phenylalanine	C00079	yes	no	Amino Acids and Derivatives	10	C00079; C02057; C02265; C07527; C18090; C18747; C19565; C19578; C20487; C20488	C9H11NO2	-0.0158763	0.950301	-0.129787	0.351703	-0.0987355	0.419371	-0.326634	0.163394	B;F4;F5;G	-	-	-1.07702	0.0282094	-	-	-1.55967	0.000164136	-1.22244	0.00690594	-	-	2.2474	2.85936e-08	-	-	-	-	3.46893	6.82034e-12	yes
199	165.04	332020	yes	product	no	no	Ribonate	C00502	yes	based on Zheng et al. 2017	-	6	C00502; C00545; C00878; C01685; C05411; C05412	C5H10O6	0.762232	0.000335232	0.99204	5.49592e-06	0.91007	2.59776e-09	0.0576537	0.766464	A1;CL;F5	1.70865	1.4532e-05	-	-	2.2545	1.62775e-11	-	-	1.58468	6.92791e-05	-	-	-	-	-	-	-	-	3.28338	4.69281e-08	yes
200	165.055	234500	yes	product	yes	yes	3-(2-Hydroxyphenyl)propanoate	C01198	no	no	Phenols and Derivatives	12	C01198; C01456; C01744; C02201; C02363; C03080; C05581; C05607; C10712; C11380; C11457; C12206	C9H10O3	2.17353	0.00441993	2.06437	1.90019e-06	2.1029	2.59424e-09	4.50878	0.00290096	CL;F4;F5;hive	-	-	-	-	0.565964	0.00193117	0.651333	0.0110123	0.623748	0.0178485	-	-	-	-	3.87069	1.53221e-11	-	-	1.70158	2.72216e-09	yes
201	166.965	7333.08	no	no	no	no	3-Sulfopyruvate	C05528	no	no	Keto-Acids and Derivatives	1	C05528	C3H4O6S	0.146734	0.231721	0.342468	0.00616138	0.269241	0.00148687	0.329484	0.0171244	CL	-	-	-	-	1.44051	0.0027007	-	-	-	-	-	-	-	-	-	-	-	-	-1.06263	5.442e-06	no
202	167.021	6.82883e+06	no	no	no	no	Urate	C00366	yes	no	Imidazopyrimidines	1	C00366	C5H4N4O3	0.0443973	0.482919	0.18567	0.031773	0.129622	0.0202892	0.196669	0.0293526	S	-	-	-	-	-	-	-	-	-	-	-	-	-	-	-	-	1.46582	0.0119979	4.34391	2.79854e-05	yes
203	167.108	33911.3	no	no	no	no	6-Oxocineole	C00848	no	no	-	30	C00848; C02108; C03448; C06069; C08489; C08498; C08546; C09785; C09786; C09804; C09836; C09842; C09854; C11402; C11403; C11414; C11418; C11651; C11937; C11943; C11944; C16461; C18019; C19083; C19731; C20221; C20222; C20223; C20322; C20323	C10H16O2	0.551177	0.468031	-0.169466	0.175666	0.105874	0.692347	0.521106	0.476493		-	-	-	-	-	-	-	-	-	-	-	-	-	-	-	-	-	-	-1.38122	0.00477677	no
204	168.043	893273	no	no	no	no	Phosphodimethylethanolamine	C13482	no	no	-	1	C13482	C4H12NO4P	0.438168	0.0365642	0.421539	0.000534896	0.43076	2.10786e-05	0.0856652	0.745388	CL	-	-	-	-	1.57971	0.000429295	-	-	-	-	-	-	-	-	-	-	-	-	-1.4744	0.000167915	yes
205	169.014	127651	no	no	no	no	Gallate	C01424	no	no	Benzoic Acid and Derivatives	1	C01424	C7H6O5	0.416705	0.0260714	-3.30068	0.200092	-2.86434	0.196	-3.3481	0.186663		-	-	-	-	-	-	-	-	-	-	-	-	-	-	-	-	-	-	2.42043	0.0019243	yes
206	169.123	11719.2	yes	product	no	no	6-endo-Hydroxycineole	C03092	no	no	-	12	C03092; C04433; C07276; C09790; C16462; C17621; C18020; C18027; C18066; C18202; C19082; C20326	C10H18O2	0.66968	0.00325871	0.546444	0.00294947	0.594906	5.945e-06	0.110338	0.497549	CL;F5	-	-	-	-	1.40622	0.000224977	-	-	1.9873	5.70488e-05	-	-	-	-	-	-	-	-	-0.379332	0.000118599	no
207	170.028	7932.11	no	no	no	no	4-Toluenesulfonamide	C14412	no	no	-	1	C14412	C7H9NO2S	0.289317	0.00660421	-0.232898	0.568741	-0.055808	0.827689	-0.166462	0.673656		-	-	-	-	-	-	-	-	-	-	-	-	-	-	-	-	-	-	0.874663	1.5899e-06	no
208	170.046	16487.1	no	no	no	yes	2,3,4,5-Tetrahydrodipicolinate	C03972	no	no	Amino Acids and Derivatives	3	C03972; C12108; C17356	C7H9NO4	0.369732	0.0178496	0.235265	0.0928465	0.28175	0.0021979	1.18837	9.26467e-05	B;hive	-	-	0.978363	0.0131455	-	-	-	-	-	-	-	-	-	-	3.41233	1.53263e-11	-	-	1.63984	1.36354e-13	no
209	170.057	9039.17	yes	product	no	yes	Metronidazole	C07203	no	no	Azoles	1	C07203	C6H9N3O3	0.993805	0.00376662	0.611245	0.000268863	0.754928	9.29362e-05	-0.781303	0.000679235	B;CL;G	-	-	1.59122	0.00119172	1.33239	0.000241735	-	-	-	-	-	-	1.30709	0.015722	-	-	-	-	1.78426	9.12398e-08	no
210	170.082	16161.8	no	no	no	no	Crotanecine	C10284	no	no	Alkaloids	2	C10284; C11837	C8H13NO3	0.0835145	0.354328	-0.00205141	0.98062	0.0252465	0.684401	-0.0283338	0.798546		-	-	-	-	-	-	-	-	-	-	-	-	-	-	-	-	-	-	2.11905	8.47658e-12	no
211	171.006	136529	no	no	no	no	sn-Glycerol 3-phosphate	C00093	yes	no	Monosaccharides	4	C00093; C00623; C02979; C03189	C3H9O6P	0.303325	0.085677	0.126915	0.363495	0.187138	0.0680089	-0.149035	0.521449	A1;F4	-1.95908	0.000452754	-	-	-	-	-1.64665	0.00590001	-	-	-	-	-	-	-	-	-	-	4.8848	7.66814e-08	yes
212	171.03	12412.1	no	no	no	no	3-Dehydroshikimate	C02637	no	no	-	8	C02637; C02652; C03063; C05600; C07478; C07479; C18306; C18318	C7H8O5	0.605326	2.11327e-05	-0.156299	0.72933	0.0983907	0.734609	-0.1989	0.668474	A1	2.43778	2.14e-06	-	-	-	-	-	-	-	-	-	-	-	-	-	-	-	-	1.93462	8.18926e-10	yes
213	171.041	10902.6	yes	product	no	no	Hydantoin-5-propionate	C05565	no	no	Imidazolidines	2	C05565; C13739	C6H8N2O4	1.76741	0.000212884	0.881411	2.62661e-08	1.24416	7.75893e-06	0.109981	0.234908	B;CL;F4	-	-	2.5892	1.66759e-11	1.94844	1.73261e-11	1.09885	0.00369292	-	-	-	-	-	-	-	-	-	-	1.72618	5.55395e-11	no
214	171.103	66783.1	no	no	no	yes	9-Oxononanoic acid	C16322	no	no	-	1	C16322	C9H16O3	1.32929	0.041392	1.85963	0.0351692	1.69455	0.00570663	1.44527	0.000336657	CL;F4	-	-	-	-	1.38979	0.00262124	1.8412	0.00234665	-	-	-	-	-	-	-	-	-	-	0.684233	4.47096e-08	yes
215	171.139	19552.1	no	no	no	yes	Decanoic acid	C01571	no	no	Fatty Acids and Conjugates	4	C01571; C02904; C12289; C12292	C10H20O2	-0.0507074	0.735738	0.145903	0.193775	0.0814066	0.338412	-0.605142	9.6499e-05	hive;S	-	-	-	-	-	-	-	-	-	-	-	-	-	-	-1.32354	0.0109003	1.23882	0.00206804	0.804252	8.1506e-10	yes
216	172.04	5458.68	no	no	no	yes	2-Quinolinecarboxylic acid	C06325	no	no	Amino Acids and Derivatives	4	C06325; C06414; C14040; C19474	C10H7NO2	-0.102073	0.328291	-0.0665521	0.326606	-0.0876613	0.137622	0.680731	0.000484281	B;G;hive	-	-	0.877823	0.0368801	-	-	-	-	-	-	-	-	1.13121	0.00180283	3.00909	1.53552e-11	-	-	1.28545	2.56497e-12	no
217	172.061	19055.8	no	no	no	yes	N-Acetyl-L-glutamate 5-semialdehyde	C01250	yes	no	Amino Acids and Derivatives	3	C01250; C12121; C17366	C7H11NO4	0.189746	0.0283738	0.121222	0.199074	0.14503	0.0226227	-0.511921	0.00168871	hive	-	-	-	-	-	-	-	-	-	-	-	-	-	-	-1.78081	0.00252289	-	-	4.32684	2.70106e-12	yes
218	172.076	11333.8	no	no	no	yes	1,3-Dimethyl-8-isoquinolinol	C12346	no	no	-	2	C12346; C18487	C11H11NO	0.0884001	0.538186	0.212819	0.0771971	0.165727	0.0517863	-0.440098	0.000844928	G	-	-	-	-	-	-	-	-	-	-	-	-	1.60648	0.00531878	-	-	-	-	1.36058	2.95403e-10	no
219	172.098	23613.3	no	no	no	no	N-Acetyl-L-leucine	C02710	yes	no	Amino Acids and Derivatives	2	C02710; C10173	C8H15NO3	0.494971	0.142585	0.856976	0.0166124	0.728607	0.00299197	-0.330863	0.0574135	CL	-	-	-	-	1.36069	0.000439712	-	-	-	-	-	-	-	-	-	-	-	-	3.07425	2.63467e-13	yes
220	173.009	119262	yes	substrate	no	yes	cis-Aconitate	C00417	yes	no	Carboxylic Acids and Derivatives	3	C00417; C02341; C05422	C6H6O6	-1.23564	0.000953455	-1.30681	9.74115e-05	-1.30312	3.21161e-07	-2.41316	8.82782e-06	CL;hive;S	-	-	-	-	-1.34754	0.00035337	-	-	-	-	-	-	-	-	-1.83715	0.000184816	-1.61121	5.61491e-05	4.8546	2.18656e-08	yes
221	173.035	4320.1	yes	substrate	no	no	Quinoxaline-2-carboxylic acid	C18624	no	no	-	2	C18624; C19560	C9H6N2O2	-0.440889	0.00898295	-0.281289	0.00343358	-0.345801	1.88318e-05	-0.176959	0.0313039	CL;S	-	-	-	-	-0.978261	0.0496094	-	-	-	-	-	-	-	-	-	-	-1.57665	0.000302535	2.11106	5.40378e-09	no
222	173.046	11737.3	no	no	no	yes	Shikimate	C00493	yes	no	Cyclic Alcohols and Derivatives	5	C00493; C04236; C16588; C18307; C18312	C7H10O5	-0.330431	0.0109897	-0.630512	0.00173257	-0.523425	0.000113518	0.612624	6.14812e-05	A1;B;CL;F4;F5;G;hive	-1.40364	7.13137e-05	-1.03231	0.00880464	-1.1105	3.231e-05	1.00429	0.0121564	-1.59578	4.54759e-06	-	-	-0.997419	0.0131428	1.65935	1.78803e-06	-	-	2.18252	1.7573e-10	yes
223	173.057	11388	no	no	no	no	N-Formimino-L-glutamate	C00439	yes	no	Amino Acids and Derivatives	2	C00439; C16674	C6H10N2O4	0.208507	0.223854	0.586752	7.57277e-05	0.442703	2.63429e-05	0.462283	0.0311437	B;CL;Fp;G;hive	-	-	1.54741	0.00706229	2.08224	9.0663e-08	-	-	-	-	1.21625	0.0123931	1.40654	0.0209534	1.56718	0.00602197	-	-	2.64872	1.80566e-07	yes
224	173.082	97361.1	yes	product	no	yes	Suberic acid	C08278	no	no	Carboxylic Acids and Derivatives	4	C08278; C14570; C16658; C19402	C8H14O4	0.788362	0.00229343	1.16036	0.00038078	1.03291	4.59192e-06	2.4199	0.00610741	CL;hive	-	-	-	-	0.994343	1.97913e-05	-	-	-	-	-	-	-	-	3.50304	1.53223e-11	-	-	1.15118	1.25805e-07	yes
225	173.093	55758.8	no	no	no	no	N-Acetylornithine	C00437	yes	no	Amino Acids and Derivatives	2	C00437; C01047	C7H14N2O3	0.144977	0.27962	0.32038	0.00480864	0.253804	0.00169175	1.70978	0.05303	hive	-	-	-	-	-	-	-	-	-	-	-	-	-	-	3.2207	1.64e-11	-	-	2.14233	3.83993e-09	yes
226	173.104	287498	no	no	no	yes	L-Arginine	C00062	no	no	Amino Acids and Derivatives	3	C00062; C00792; C02385	C6H14N4O2	-0.0528367	0.83197	0.318497	0.0438754	0.173091	0.170701	-1.25154	8.54853e-06	hive	-	-	-	-	-	-	-	-	-	-	-	-	-	-	-1.76078	0.00155315	-	-	1.73151	2.7486e-10	yes
227	174.041	16830.5	yes	product	no	yes	N-Acetyl-L-aspartate	C01042	yes	no	Amino Acids and Derivatives	3	C01042; C01045; C05520	C6H9NO5	0.655267	0.00831823	0.582306	4.14377e-05	0.610878	7.59342e-08	1.7485	0.0033077	A1;CL;hive	-0.863558	0.001388	-	-	0.745857	0.000165031	-	-	-	-	-	-	-	-	3.54012	1.53221e-11	-	-	3.75875	1.27537e-09	yes
228	174.056	12099.9	no	no	no	yes	Indole-3-acetate	C00954	no	no	Indoles	9	C00954; C01386; C02298; C03230; C05634; C06331; C06344; C06525; C11504	C10H9NO2	0.0976393	0.620703	0.252418	0.0221307	0.168545	0.136014	1.4751	0.00460768	hive;S	-	-	-	-	-	-	-	-	-	-	-	-	-	-	3.47371	1.53305e-11	0.751286	0.0425706	1.96966	7.83408e-13	no
229	174.077	26219.5	yes	substrate	no	no	Calystegin B2	C10851	yes	no	Tropanes	1	C10851	C7H13NO4	-0.62895	4.34163e-06	-0.3423	0.0094515	-0.43703	7.9316e-06	0.263157	0.639796		-	-	-	-	-	-	-	-	-	-	-	-	-	-	-	-	-	-	3.63577	8.26939e-11	yes
230	175.025	111095	yes	product	yes	yes	2-Hydroxy-3-oxoadipate	C00072	yes	product of 2-maleylacetate reductase	Furans	13	C00072; C02670; C03217; C03289; C03387; C04053; C04349; C04471; C06033; C06430; C06440; C19806; C20364	C6H8O6	4.30332	0.00379265	3.93532	4.40682e-05	4.07049	1.66923e-07	3.42576	0.00870881	CL;F5;hive	-	-	-	-	2.09014	1.53838e-11	-	-	2.21723	5.82385e-11	-	-	-	-	1.4247	1.34948e-05	-	-	3.00055	1.64175e-12	yes
231	175.051	8655.3	yes	product	no	yes	4-Hydroxyaminoquinoline N-oxide	C04050	no	no	-	2	C04050; C07899	C9H8N2O2	1.57064	0.00447773	1.51551	6.2434e-05	1.53319	1.01793e-07	1.17302	0.000341164	CL;F5;hive	-	-	-	-	2.37609	1.54105e-11	-	-	1.38638	0.000406289	-	-	-	-	1.60386	2.53192e-05	-	-	0.827962	6.37952e-09	no
232	175.061	28811	no	no	no	yes	3-Propylmalate	C02123	no	no	-	4	C02123; C02504; C03328; C04411	C7H12O5	1.45024	0.0168653	2.26066	5.35237e-05	2.0154	2.2858e-06	1.21344	0.00845253	CL;Fp	-	-	-	-	2.41568	1.56249e-11	-	-	-	-	0.98843	0.00925613	-	-	-	-	-	-	0.354811	2.71923e-05	yes
233	175.097	32450.1	no	no	no	yes	L-Cladinose	C11917	no	no	-	2	C11917; C18744	C8H16O4	-0.0223435	0.943125	-0.0814819	0.602621	-0.0540052	0.667414	-1.33222	7.03763e-07	A1;B;hive;S	-2.33663	5.69692e-10	-1.52921	4.42178e-05	-	-	-	-	-	-	-	-	-	-	-1.86415	4.48729e-07	-1.32222	1.611e-05	0.796489	1.61167e-05	no
234	176.057	14185.7	no	no	no	yes	4-Hydroxy-4-methylglutamate	C06034	yes	no	-	4	C06034; C17576; C20844; C20845	C6H11NO5	0.055619	0.57206	-0.074672	0.423724	-0.0276453	0.672488	-0.865777	6.98247e-08	F5;hive	-	-	-	-	-	-	-	-	-1.56128	0.000228921	-	-	-	-	-2.42858	4.96109e-09	-	-	3.92501	3.65698e-10	yes
235	177.04	57853.9	no	no	no	no	D-Glucono-1,5-lactone	C00198	yes	no	Monosaccharides	22	C00198; C00204; C00273; C00691; C01040; C01115; C01216; C02669; C02692; C02779; C03107; C03269; C03383; C03926; C05394; C05410; C06892; C16737; C17577; C19679; C20251; C20680	C6H10O6	-0.101911	0.254086	-0.221413	0.0505848	-0.17768	0.0162895	-0.0121579	0.922089	A1;F5	2.63729	1.4172e-10	-	-	-	-	-	-	-1.28424	0.00316644	-	-	-	-	-	-	-	-	4.72555	7.85535e-12	yes
236	177.056	12335	no	no	no	no	Vermelone	C01624	no	no	-	6	C01624; C02666; C10667; C14784; C20327; C20646	C10H10O3	0.0874937	0.172177	0.134476	0.0438754	0.126587	0.0222173	-0.145662	0.133975	A1;F5	1.38238	0.0202147	-	-	-	-	-	-	-1.28146	0.0422706	-	-	-	-	-	-	-	-	1.32321	1.40053e-12	yes
237	177.092	7506.09	no	no	no	yes	Methyleugenol	C10454	no	no	Phenols and Derivatives	8	C10454; C10478; C14535; C14709; C17663; C17665; C17666; C17782	C11H14O2	0.118945	0.0443798	0.197555	0.00116291	0.171837	7.35874e-05	0.412235	0.00353867	CL;hive	-	-	-	-	1.18252	0.00354271	-	-	-	-	-	-	-	-	2.6651	4.89357e-08	-	-	-0.224334	0.528887	no
238	177.128	4122.11	yes	product	no	no	Propofol	C07523	no	no	-	2	C07523; C14465	C12H18O	0.229608	0.00880743	0.319629	2.03987e-05	0.290141	1.62848e-07	0.397139	0.0609643	B;CL;hive	-	-	1.77658	0.00032854	1.67313	4.27195e-06	-	-	-	-	-	-	-	-	2.13784	8.20008e-06	-	-	-2.00837	0.0104412	no
239	178.037	14924.6	no	no	no	yes	Isoxanthopterin	C03975	yes	no	Pteridines and Derivatives	1	C03975	C6H5N5O2	-0.436156	0.085677	-0.241943	0.405868	-0.280997	0.197504	-0.783217	0.000353286		-	-	-	-	-	-	-	-	-	-	-	-	-	-	-	-	-	-	2.29506	2.09415e-12	yes
240	178.051	18873.7	no	no	no	no	Hippurate	C01586	yes	no	Amino Acids and Derivatives	4	C01586; C06332; C06339; C19569	C9H9NO3	0.121278	0.389915	0.123687	0.0863657	0.126051	0.038073	-0.0506159	0.681253	A1;S	-1.64778	0.00204198	-	-	-	-	-	-	-	-	-	-	-	-	-	-	-1.16694	0.0141959	2.34132	2.33561e-09	yes
241	178.087	54640.2	no	no	no	yes	Phenacetin	C07591	no	no	-	7	C07591; C09642; C10146; C14579; C17235; C18771; C18887	C10H13NO2	-0.254493	0.0615502	-0.00512663	0.963814	-0.0895906	0.289334	-1.36636	2.03594e-05	A1;F4;hive;S	-1.17786	0.00454148	-	-	-	-	1.47849	0.000120897	-	-	-	-	-	-	-2.01173	9.20831e-08	-1.10577	0.000665227	1.54016	5.21646e-10	yes
242	179.035	125550	yes	substrate	no	yes	3-(4-Hydroxyphenyl)pyruvate	C01179	yes	no	Benzyl Alcohols and Derivatives	7	C01179; C01197; C01405; C01481; C05350; C12623; C13400	C9H8O4; C9H8O4.	-2.49094	5.7107e-05	-1.42927	0.000202625	-1.86985	2.68488e-07	-2.11203	3.87997e-05	CL;F5;G;hive;S	-	-	-	-	-1.1718	0.000169729	-	-	-1.30375	0.0025453	-	-	1.44035	0.000549608	-1.43274	0.000600028	-1.1786	0.000617109	2.48584	2.7486e-10	yes
243	179.056	775563	no	no	no	no	D-Glucose	C00031	yes	no	Monosaccharides	40	C00031; C00095; C00124; C00137; C00159; C00221; C00247; C00267; C00737; C00738; C00764; C00795; C00936; C00962; C00984; C01452; C01487; C01582; C01680; C01719; C01720; C01825; C01906; C01934; C02209; C02336; C02782; C05003; C06152; C06153; C06464; C06465; C06466; C06467; C06468; C08351; C08356; C10906; C15923; C19891	C6H12O6	0.189033	0.0996409	0.137623	0.111755	0.160874	0.0173897	-0.619879	0.0711489	A1;hive	-2.55682	4.39885e-10	-	-	-	-	-	-	-	-	-	-	-	-	-1.5355	0.000197857	-	-	5.54381	4.96976e-12	yes
244	179.107	9743.51	no	no	no	yes	3-tert-Butyl-5-methylcatechol	C03929	no	no	-	1	C03929	C11H16O2	-0.0209576	0.781782	0.111162	0.0346094	0.0675518	0.101389	1.42043	0.00442047	hive	-	-	-	-	-	-	-	-	-	-	-	-	-	-	3.70644	1.53e-11	-	-	0.315701	9.58781e-06	yes
245	180.067	214709	no	no	no	no	L-Tyrosine	C00082	yes	no	Amino Acids and Derivatives	8	C00082; C01536; C03290; C04368; C06420; C19579; C19712; C20807	C9H11NO3	0.0108675	0.964118	-0.0396713	0.790377	-0.0350313	0.782859	-0.193131	0.492089	F4;F5;G	-	-	-	-	-	-	-1.35597	0.00208065	-1.29539	0.00393927	-	-	2.3626	9.97341e-09	-	-	-	-	2.66046	8.58153e-13	yes
246	181.037	261654	no	no	no	yes	7-Methyluric acid	C16355	no	no	Imidazopyrimidines	2	C16355; C16359	C6H6N4O3	0.0929637	0.75419	0.407532	0.061327	0.221701	0.275081	1.52714	5.10696e-09	G;hive;S	-	-	-	-	-	-	-	-	-	-	-	-	1.45657	0.000781973	3.28381	1.55139e-11	0.933196	0.0212395	1.39914	0.000143158	yes
247	181.05	146495	yes	product	no	no	3-(3,4-Dihydroxyphenyl)propanoate	C03672	no	no	Benzyl Alcohols and Derivatives	8	C03672; C03964; C04044; C05582; C05583; C10447; C10680; C12622	C9H10O4	2.07605	0.00180911	1.68111	3.59533e-05	1.82939	5.20842e-07	3.43102	0.0381283	hive	-	-	-	-	-	-	-	-	-	-	-	-	-	-	3.34835	1.54e-11	-	-	1.89207	1.38825e-10	yes
248	181.072	855365	no	no	no	yes	Mannitol	C00392	yes	no	Fatty Alcohols	6	C00392; C00794; C01489; C01507; C01697; C01722	C6H14O6	-0.0392407	0.923893	-0.459483	0.178847	-0.316655	0.215962	-1.6958	0.000973067	A1;B;F5;hive	-1.60183	0.0153099	-1.55204	0.0214503	-	-	-	-	-2.03189	0.000594935	-	-	-	-	-1.63332	0.0123103	-	-	3.15299	1.10399e-07	yes
249	182.057	53065.7	yes	product	no	no	4-Amino-2-hydroxylamino-6-nitrotoluene	C16403	no	no	-	1	C16403	C7H9N3O3	1.44792	0.00213089	1.04466	2.29859e-05	1.19355	3.44422e-07	2.27043	0.0318248	CL;hive	-	-	-	-	0.930894	0.00347989	-	-	-	-	-	-	-	-	3.34972	1.53645e-11	-	-	0.316736	0.0415739	yes
250	182.972	28131	no	no	no	no	3-Phosphonooxypyruvate	C03232	no	no	Keto-Acids and Derivatives	1	C03232	C3H5O7P	0.101073	0.461234	-0.609805	0.0022768	-0.373512	0.0124135	-0.560217	0.020184	A1;B;CL;F5;Fp;G;hive;S	-2.28291	1.4522e-05	-1.48553	0.0148939	-1.69211	2.53526e-05	-	-	-2.17223	4.14359e-05	-1.42341	0.00219442	-1.40897	0.0259792	-1.57962	0.00725907	-1.6407	0.000220291	2.18332	2.17412e-12	no
251	182.993	22738.4	no	no	no	no	2-Pyrone-4,6-dicarboxylate	C03671	yes	no	-	2	C03671; C08476	C7H4O6	0.17012	0.137816	-0.319127	0.00522383	-0.151991	0.113797	-0.288377	0.150953	A1;CL;F5;Fp;G;S	-1.84178	0.00118346	-	-	-1.33141	0.00251797	-	-	-1.7546	0.00242938	-1.25239	0.0148759	-2.1565	7.54354e-05	-	-	-1.23171	0.0178319	2.38	1.31097e-13	yes
252	183.029	13266.6	yes	product	no	yes	3,4-Dihydroxymandelate	C05580	no	no	Phenols and Derivatives	3	C05580; C05616; C18724	C8H8O5; C8H8O5.	0.319105	0.00275518	0.358124	0.006169	0.355241	0.000198546	-0.468539	0.00396467	CL	-	-	-	-	1.28062	0.0037089	-	-	-	-	-	-	-	-	-	-	-	-	1.28219	3.94082e-12	yes
253	183.056	5310.45	yes	product	no	no	Fuberidazole	C18737	no	no	-	1	C18737	C11H8N2O	0.753531	2.30345e-05	0.575755	2.11584e-06	0.635767	3.9642e-09	1.64732	0.0176241	CL;hive	-	-	-	-	0.823562	0.00253399	-	-	-	-	-	-	-	-	3.58084	1.53227e-11	-	-	0.949822	5.61227e-11	no
254	183.103	59892.6	yes	product	no	yes	5-exo-Hydroxy-1,2-campholide	C03843	no	no	-	8	C03843; C04718; C06066; C11405; C11419; C19079; C19084; C20324	C10H16O3	0.98295	5.15792e-05	0.994568	4.40682e-05	0.997488	2.3696e-08	2.55048	0.00480942	B;CL;F4;hive	-	-	1.15089	7.31332e-05	0.749258	0.00111923	1.11101	0.000143529	-	-	-	-	-	-	3.66769	1.53221e-11	-	-	0.549052	2.34999e-06	yes
255	183.139	16061.3	yes	product	no	yes	Citronellyl formate	C12295	no	no	Prenol Lipids	4	C12295; C13823; C13910; C19420	C11H20O2	1.02294	0.000881404	1.18732	8.47323e-07	1.11666	1.17315e-10	1.31466	0.00379069	CL;F5;hive	-	-	-	-	2.24256	1.53416e-11	-	-	1.04955	0.0022136	-	-	-	-	2.6115	1.54202e-11	-	-	0.402748	0.00354151	no
256	184.002	47351.3	no	no	no	no	O-Phospho-L-serine	C01005	yes	no	Amino Acids and Derivatives	2	C01005; C02532	C3H8NO6P	0.372489	0.111486	-0.396722	0.245398	-0.141872	0.544944	-0.794916	0.0404843	A1;S	-1.49265	0.0346213	-	-	-	-	-	-	-	-	-	-	-	-	-	-	-1.58265	0.00166757	2.61316	2.52075e-08	yes
257	184.025	4572.53	no	no	no	no	2-Amino-3-carboxymuconate semialdehyde	C04409	no	no	Amino Acids and Derivatives	1	C04409	C7H7NO5	0.188651	0.0728158	0.159901	0.0305041	0.175417	0.00303223	0.411078	0.112287	hive	-	-	-	-	-	-	-	-	-	-	-	-	-	-	1.81004	0.00820434	-	-	0.126472	0.324441	no
258	184.098	5198.76	no	no	no	no	Otonecine	C10356	no	no	Alkaloids	4	C10356; C10858; C12449; C20673	C9H15NO3	0.28689	0.011342	0.141526	0.0462318	0.190597	0.000749361	0.200829	0.121343	B	-	-	2.64794	1.63e-08	-	-	-	-	-	-	-	-	-	-	-	-	-	-	2.72705	7.2248e-12	no
259	184.108	9275.17	yes	product	no	yes	Isocarbamid	C19047	no	no	-	1	C19047	C8H15N3O2	1.64317	0.00157113	1.35706	4.83141e-05	1.45893	4.54768e-08	2.82794	2.06886e-05	B;CL;F4;hive	-	-	1.39875	1.5785e-11	0.97665	2.5239e-11	0.72923	7.47003e-05	-	-	-	-	-	-	3.81535	1.53221e-11	-	-	1.41247	6.44474e-07	no
260	185.056	11078.1	yes	substrate	no	no	AMPA	C13672	yes	no	-	1	C13672	C7H10N2O4	-0.439085	0.000416619	-0.2341	0.00808735	-0.316037	7.19082e-06	-0.312029	0.0138475	CL;F5;G;hive	-	-	-	-	-0.8159	0.0265043	-	-	-1.25866	0.0041396	-	-	2.15135	7.41098e-08	-1.05943	0.029907	-	-	2.62276	5.53501e-09	yes
261	185.083	40898.8	yes	product	no	yes	cis-2-Carboxycyclohexyl-acetic acid	C14112	no	no	-	1	C14112	C9H14O4	0.526727	5.11262e-06	0.732619	3.21556e-05	0.654181	1.04913e-08	0.670468	0.00474117	CL;hive	-	-	-	-	2.16695	1.61583e-11	-	-	-	-	-	-	-	-	1.93749	2.38077e-07	-	-	0.714274	1.4236e-11	no
262	185.119	2.61824e+06	yes	product	yes	yes	10-Oxodecanoate	C02217	no	no	-	8	C02217; C11404; C11406; C11417; C11420; C13945; C17620; C20714	C10H18O3	1.17023	0.0023802	1.81543	0.00578606	1.64896	0.000736668	0.87261	0.00491279	CL	-	-	-	-	1.70239	8.85e-05	-	-	-	-	-	-	-	-	-	-	-	-	1.16535	4.34844e-07	yes
263	186.042	7546.1	no	no	no	no	2-(Acetamidomethylene)succinate	C01215	no	no	-	2	C01215; C20258	C7H9NO5	-0.105984	0.200271	-0.0470705	0.704367	-0.0612104	0.474147	0.234646	0.0851087		-	-	-	-	-	-	-	-	-	-	-	-	-	-	-	-	-	-	2.42578	4.64503e-10	no
264	186.077	28824.3	yes	substrate	no	yes	6-Acetamido-3-oxohexanoate	C03682	yes	no	-	4	C03682; C05548; C11842; C12988	C8H13NO4	-1.16129	1.76388e-07	-1.0754	3.89161e-06	-1.10609	4.84783e-12	-1.56278	7.03763e-07	CL;F5;hive	-	-	-	-	-1.9554	2.49394e-11	-	-	-1.40587	0.000151108	-	-	-	-	-2.46165	6.0791e-11	-	-	5.9937	2.7486e-10	yes
265	187.007	7729.61	no	no	no	yes	4-Sulfobenzyl alcohol	C06678	no	no	-	1	C06678	C7H8O4S	-0.00405995	0.974619	0.148201	0.256317	0.11961	0.298226	-0.901613	6.90463e-06	A1;hive	-1.35875	0.0252585	-	-	-	-	-	-	-	-	-	-	-	-	-1.82696	0.000498155	-	-	1.7931	8.61976e-07	no
266	187.025	10694.1	yes	product	no	yes	(Z)-But-1-ene-1,2,4-tricarboxylate	C04002	no	no	-	5	C04002; C04225; C11514; C11515; C16579	C7H8O6	0.518692	0.00488125	0.379675	0.000531829	0.430377	7.55479e-07	0.735034	0.00196848	CL;hive	-	-	-	-	1.27132	0.00135022	-	-	-	-	-	-	-	-	2.8059	1.26781e-08	-	-	0.706335	7.14029e-06	no
267	187.061	16964.9	no	no	no	no	2-Oxosuberate	C16589	yes	no	-	1	C16589	C8H12O5	0.508746	0.000847997	0.204333	0.375222	0.312891	0.0304552	0.350544	0.115579		-	-	-	-	-	-	-	-	-	-	-	-	-	-	-	-	-	-	2.15935	1.77209e-05	yes
268	187.098	85751.2	yes	product	no	no	Azelaic acid	C08261	yes	no	Carboxylic Acids and Derivatives	2	C08261; C17878	C9H16O4	0.366764	0.000671942	0.631391	9.08892e-08	0.517455	5.04928e-10	-0.0508586	0.591027	A1;CL;G;S	-1.12584	0.0158812	-	-	1.9004	7.75596e-10	-	-	-	-	-	-	1.08761	0.0228885	-	-	1.07066	0.00265536	2.26409	1.56286e-11	yes
269	187.109	153264	yes	substrate	no	yes	Glycyl-leucine	C02155	yes	no	Peptides	4	C02155; C02727; C03846; C12989	C8H16N2O3	-0.568214	9.36457e-05	-0.544927	1.92365e-05	-0.558337	1.41082e-09	-0.982446	5.95417e-07	CL;F4;F5;Fp;hive	-	-	-	-	-1.58489	2.36639e-10	-0.99199	0.00531713	-2.01207	7.25518e-10	-1.05081	9.66371e-05	-	-	-2.48827	1.573e-11	-	-	3.20102	5.98996e-11	yes
270	187.134	1.68618e+06	no	no	no	no	10-Hydroxydecanoic acid	C02774	no	no	-	2	C02774; C18067	C10H20O3	-0.369848	0.0647385	0.259308	0.357992	0.112977	0.626167	-0.619277	0.0113001	F5	-	-	-	-	-	-	-	-	2.87596	2.69e-09	-	-	-	-	-	-	-	-	0.622528	1.12526e-06	no
271	188.001	2904.04	yes	product	no	yes	2-Pyridyl hydroxymethane sulfonic acid	C11327	no	no	-	1	C11327	C6H7NO4S	0.785389	0.00526231	0.70272	9.1788e-05	0.734009	1.62848e-07	0.988481	0.00648804	CL;F5;Fp;G;hive;S	-	-	-	-	1.67399	1.49338e-07	-	-	1.13845	0.0235281	1.11641	0.00291035	2.0416	1.06834e-06	2.62499	7.47409e-10	1.12304	0.00267847	0.893695	3.48396e-07	no
272	188.035	50554.8	yes	product	yes	yes	4-Hydroxy-2-quinolinecarboxylic acid	C01717	no	no	Amino Acids and Derivatives	6	C01717; C02172; C14800; C14802; C16715; C18621	C10H7NO3	1.78188	0.00803676	1.93886	1.1803e-05	1.8734	3.10681e-08	2.89169	0.00221988	CL;F5;Fp;G;hive;S	-	-	-	-	1.41696	4.66321e-10	-	-	0.965515	0.00222544	1.09496	5.99064e-06	2.20424	1.64696e-11	3.21054	1.53225e-11	1.51221	7.53211e-10	1.57626	7.43652e-07	no
273	188.057	116300	yes	product	no	no	N-Acetyl-L-glutamate	C00624	yes	no	Amino Acids and Derivatives	3	C00624; C03871; C12109	C7H11NO5	0.891696	0.00750504	0.901005	3.38688e-06	0.890185	1.86273e-08	0.951256	0.0457072	A1;CL;F5;hive	-1.16962	0.00202738	-	-	1.79483	9.42113e-11	-	-	1.20715	0.00126518	-	-	-	-	1.93179	4.58103e-08	-	-	2.90872	2.9625e-16	yes
274	188.073	12812.3	no	no	no	no	Phensuximide	C07437	no	no	Pyrrolidines	4	C07437; C09348; C12345; C20635	C11H11NO2	0.106651	0.389915	0.0993425	0.328564	0.0979501	0.175591	-0.208537	0.163394	A1;F5	-1.75457	0.000270325	-	-	-	-	-	-	1.55633	0.00187777	-	-	-	-	-	-	-	-	2.45225	2.84977e-15	no
275	188.093	67893.9	yes	substrate	no	yes	Castanospermine	C02256	yes	no	Alkaloids	5	C02256; C06326; C10124; C10132; C11843	C8H15NO4	-1.03275	0.000124655	-0.902856	8.06143e-05	-0.948298	5.3758e-09	-1.73803	4.29142e-06	A1;B;CL;F4;F5;Fp;G;hive;S	-1.06198	0.0119477	-1.11813	0.00643314	-1.48211	1.11973e-07	-1.14506	0.00473819	1.37657	0.000282084	-1.39566	4.02499e-06	-1.50576	5.20186e-05	-2.23101	1.97944e-09	-0.951939	0.00421553	3.82558	7.89387e-10	yes
276	188.111	17869.5	yes	substrate	no	yes	EPTC	C11081	no	no	-	2	C11081; C17251	C9H19NOS	-0.654212	1.59402e-05	-0.556362	4.26699e-05	-0.594085	9.37806e-10	-1.07271	6.61023e-07	CL;F4;Fp;hive	-	-	-	-	-1.82309	4.14548e-10	-1.4655	0.000137018	-	-	-1.35392	1.34604e-05	-	-	-2.98872	1.55139e-11	-	-	2.6616	6.13784e-10	no
277	188.986	27693.5	yes	product	no	no	3-Sulfocatechol	C06336	yes	no	-	2	C06336; C06674	C6H6O5S	0.468291	0.000736333	0.325674	0.00030115	0.378522	5.61959e-08	-0.0513228	0.817403	CL	-	-	-	-	1.26407	0.000636999	-	-	-	-	-	-	-	-	-	-	-	-	3.43612	1.66152e-11	yes
278	189.004	27201.5	no	no	no	yes	Oxalosuccinate	C05379	yes	no	Carboxylic Acids and Derivatives	1	C05379	C6H6O7	0.321613	0.024502	0.343475	0.000663419	0.339455	6.44683e-06	0.452117	0.00768082	CL;F5;hive;S	-	-	-	-	1.46455	0.000350449	-	-	1.41471	0.0231469	-	-	-	-	2.00522	0.000169389	1.72578	7.41994e-05	2.44694	5.71985e-14	yes
279	189.06	13323.4	yes	product	no	no	2-Oxo-7-methylthioheptanoic acid	C17220	no	no	-	1	C17220	C8H14O3S	0.578168	0.00362378	0.615571	1.48293e-06	0.613478	1.03577e-08	0.587633	0.0311559	A1;CL;hive	-1.32003	0.0054912	-	-	1.65615	3.53974e-07	-	-	-	-	-	-	-	-	1.5647	0.000438211	-	-	2.14992	2.09173e-08	no
280	189.077	11611.8	no	no	no	yes	(R)-3-((R)-3-Hydroxybutanoyloxy)butanoate	C04546	yes	no	-	1	C04546	C8H14O5	0.538933	0.013056	0.621488	1.92145e-06	0.599865	2.36264e-08	1.4168	0.000680339	B;CL;F5;G;hive	-	-	1.31954	3.81368e-06	1.18131	5.53063e-08	-	-	1.10882	0.000147929	-	-	0.891693	0.00462477	3.66358	1.53221e-11	-	-	2.81656	3.82195e-11	yes
281	190.015	13076.5	no	no	no	no	5,6-Indolequinone-2-carboxylic acid	C17938	no	no	-	1	C17938	C9H5NO4	0.0739315	0.377209	0.142237	0.0046972	0.119963	0.00313077	0.0301433	0.563615	CL;Fp;G	-	-	-	-	1.01195	0.0450176	-	-	-	-	1.22323	0.0151499	1.62365	0.00517895	-	-	-	-	-0.30969	8.68643e-11	no
282	190.051	47831.2	yes	substrate	no	yes	5-Hydroxyindoleacetate	C05635	yes	no	Indoles	3	C05635; C06725; C16596	C10H9NO3	-0.625457	0.0035092	-0.3789	0.00038439	-0.485862	9.04367e-06	-0.592463	1.7228e-05	B;CL;F4;F5;hive	-	-	1.29269	0.00118154	-0.968228	0.00149688	-1.67698	8.74085e-06	1.23397	0.00235733	-	-	-	-	-1.41179	0.000275042	-	-	2.91692	1.38266e-09	yes
283	190.072	10209.2	no	no	no	yes	2-Amino-3,7-dideoxy-D-threo-hept-6-ulosonic acid	C16850	yes	no	-	1	C16850	C7H13NO5	-0.227458	0.22199	-0.332221	0.0848463	-0.296415	0.0212585	-1.00446	7.07119e-05	hive	-	-	-	-	-	-	-	-	-	-	-	-	-	-	-1.9845	0.000952115	-	-	5.19959	7.60002e-05	yes
284	190.087	8848.53	no	no	no	yes	Ephedroxane	C17902	no	no	-	1	C17902	C11H13NO2	0.444709	0.00899635	-0.126692	0.642819	0.109786	0.608121	-1.92074	0.000790591	F5;G;hive	-	-	-	-	-	-	-	-	-1.51815	0.00255533	-	-	1.75158	0.000261999	-1.70875	0.000403332	-	-	2.5351	8.66093e-13	no
285	191.02	2.69727e+06	yes	substrate	yes	yes	Citrate	C00158	yes	no	Carboxylic Acids and Derivatives	10	C00158; C00311; C00451; C00679; C02780; C03600; C03921; C04575; C04617; C12649	C6H8O7; C6H8O7.	-3.20385	9.16554e-05	-2.83885	8.55653e-06	-3.02344	6.80667e-09	-2.93671	7.78213e-06	CL;F5;Fp;hive;S	-	-	-	-	-1.66791	2.48515e-07	-	-	-1.6726	0.000118544	-1.5949	5.56072e-06	-	-	-1.68568	0.000102216	-1.3239	0.000248248	5.24187	3.05898e-10	yes
286	191.056	175001	yes	substrate	yes	yes	Quinate	C00296	yes	no	-	3	C00296; C01295; C12113	C7H12O6	-3.36487	2.72599e-05	-3.64512	1.17523e-05	-3.54377	9.87801e-09	-2.80411	2.05244e-05	A1;CL;F5;G;hive	-1.82377	9.98947e-09	-	-	-1.85562	1.58075e-11	-	-	-1.88303	3.73751e-09	-	-	-1.39449	1.12393e-05	-1.72805	4.88885e-08	-	-	7.05447	7.94866e-10	yes
287	191.092	8687.89	yes	substrate	no	yes	D-Mycinose	C11913	no	no	-	1	C11913	C8H16O5	-1.01704	0.00234093	-0.845056	0.00578606	-0.93302	2.91023e-05	-1.15854	0.00126881	CL;F5;Fp;hive;S	-	-	-	-	-1.20728	0.00341438	-	-	-1.76044	0.000726824	-1.24094	0.00677727	-	-	-1.50338	0.0069239	-1.14087	0.0179472	2.50132	6.18715e-12	no
288	191.144	3153.6	no	no	no	no	alpha-Ionone	C12286	no	no	Prenol Lipids	3	C12286; C12287; C14698	C13H20O	-0.259814	0.11194	-0.00629907	0.961944	-0.11722	0.273467	-0.0965446	0.595795	B;F4;F5;Fp	-	-	2.23537	2.77732e-09	-	-	1.00501	0.02479	-1.37938	0.000339809	-1.04484	0.00133873	-	-	-	-	-	-	2.05628	6.99854e-11	no
289	192.053	16830.6	no	no	no	yes	Toxoflavine	C16789	yes	no	-	1	C16789	C7H7N5O2	-0.200425	0.211788	-0.116863	0.280046	-0.137393	0.101371	-0.768075	1.34469e-05	A1;F4;hive	-1.2668	0.0232466	-	-	-	-	1.23222	0.030602	-	-	-	-	-	-	-2.00967	1.80758e-05	-	-	4.06573	6.79747e-10	yes
290	192.066	36689.4	no	no	no	yes	(3-Arylcarbonyl)-alanine	C03450	yes	no	-	7	C03450; C05598; C06726; C09962; C10581; C16587; C16595	C10H11NO3	0.489626	0.0580109	0.439239	0.000276622	0.459626	1.71558e-05	-0.381183	3.77524e-05	CL;hive	-	-	-	-	1.74781	7.26008e-09	-	-	-	-	-	-	-	-	-1.14033	0.0119357	-	-	3.01639	2.68368e-11	yes
291	192.103	6120.17	no	no	no	no	3,4-Methylenedioxymethamphetamine	C07577	no	no	Phenethylamines	6	C07577; C07875; C09460; C09640; C18418; C18957	C11H15NO2	-0.335476	0.122879	0.264514	0.0129692	-0.208165	0.554869	0.626939	0.152019	G;hive	-	-	-	-	-	-	-	-	-	-	-	-	3.53431	1.53221e-11	0.75855	0.0182384	-	-	2.1266	5.87746e-08	no
292	193.036	194635	no	no	no	no	D-Glucuronate	C00191	yes	no	Sugar Acids and Derivatives	15	C00191; C00333; C00558; C00618; C00905; C01062; C02024; C03342; C06472; C06473; C06477; C08348; C08350; C15673; C16245	C6H10O7	0.0234725	0.943125	-0.0719143	0.517193	-0.0442299	0.704108	0.226012	0.187647	B	-	-	2.33728	2.81e-06	-	-	-	-	-	-	-	-	-	-	-	-	-	-	3.49715	7.90003e-14	yes
293	193.051	28417.4	yes	substrate	no	yes	Scytalone	C00779	yes	no	-	9	C00779; C01494; C02379; C09974; C10470; C10477; C11233; C12204; C16982	C10H10O4	-0.741416	0.000189438	-0.603929	1.53454e-06	-0.662054	6.30308e-11	-0.889375	6.73226e-07	B;CL;G;hive	-	-	1.66502	1.83325e-06	-0.777898	0.0103845	-	-	-	-	-	-	2.29635	1.59206e-10	-1.04652	0.00787167	-	-	2.57231	5.34002e-12	yes
294	193.072	132449	yes	substrate	no	yes	5-O-Methyl-myo-inositol	C03365	yes	no	Cyclic Alcohols and Derivatives	9	C03365; C03619; C03659; C03660; C03844; C05163; C06352; C06353; C08257	C7H14O6	-1.87208	3.61527e-09	-1.31446	4.72561e-05	-1.47348	1.50229e-09	-1.78153	7.40759e-07	CL;hive	-	-	-	-	-1.5497	1.37918e-07	-	-	-	-	-	-	-	-	-1.83791	1.98504e-06	-	-	3.5059	1.11575e-12	yes
295	193.16	2709.59	no	no	no	no	Oxidized Latia luciferin	C03527	no	no	Prenol Lipids	1	C03527	C13H22O	0.102712	0.368018	0.264616	0.0203437	0.205456	0.00940858	0.0722906	0.654926	B;CL	-	-	2.9779	8.19699e-11	0.858327	0.0436088	-	-	-	-	-	-	-	-	-	-	-	-	0.50904	2.53042e-05	no
296	194.044	15693.4	no	no	no	no	Dopaquinone	C00822	no	no	Amino Acids and Derivatives	5	C00822; C04274; C05604; C07588; C19631	C9H9NO4	0.0239252	0.829231	-0.0945121	0.16162	-0.052202	0.319151	0.120502	0.341922	B	-	-	1.68523	0.00368945	-	-	-	-	-	-	-	-	-	-	-	-	-	-	4.09643	1.24771e-11	no
297	194.082	145828	yes	product	no	yes	L-Tyrosine methyl ester	C03404	yes	no	Amino Acids and Derivatives	7	C03404; C07921; C10588; C11820; C16586; C18622; C20800	C10H13NO3	0.649437	0.0080817	0.63508	7.13445e-05	0.637996	1.29336e-07	-1.42408	0.00153923	B;CL;F5;hive	-	-	1.34369	0.00135482	1.49361	6.15587e-07	-	-	1.40573	0.000665015	-	-	-	-	-1.69433	1.98255e-05	-	-	2.54137	3.26187e-08	yes
298	194.971	10682.3	no	no	no	yes	1-Carboxyvinyl carboxyphosphonate	C06367	no	no	-	2	C06367; C17946	C4H5O7P	-0.0744221	0.705767	-0.345823	0.0195054	-0.248142	0.0235145	-0.506942	0.00232972	B;CL;F4;F5;hive	-	-	-2.12381	0.000494702	-1.21376	0.0227056	-1.53918	0.0324094	-1.57293	0.0262282	-	-	-	-	-1.68725	0.0124047	-	-	3.52331	1.12672e-11	no
299	195.016	460751	no	no	no	no	Tetrahydroxypteridine	C03178	yes	no	-	2	C03178; C03314	C6H4N4O4	-0.616586	0.0483394	-0.0237287	0.885422	-0.209094	0.133464	0.0465409	0.798546		-	-	-	-	-	-	-	-	-	-	-	-	-	-	-	-	-	-	7.36706	3.58455e-11	yes
300	195.051	4.60858e+06	yes	substrate	yes	yes	D-Gluconic acid	C00257	yes	no	Sugar Acids and Derivatives	10	C00257; C00514; C00770; C00800; C00817; C00880; C03215; C15930; C16356; C16360	C6H12O7; C7H8N4O3	-1.35318	0.000592148	-2.41241	3.74106e-05	-2.0543	4.26805e-07	-3.33792	1.70031e-05	B;CL;F4;F5;G;hive	-	-	-1.98814	2.80176e-05	-1.86649	1.79223e-07	-1.48229	0.0041285	-1.89128	7.69404e-05	-	-	-1.69164	0.000574627	-2.0709	1.16533e-05	-	-	8.00717	1.94781e-12	yes
301	197.009	19126.2	no	no	no	no	3,4-Dihydroxyphthalate	C03223	no	no	-	2	C03223; C03233	C8H6O6	0.68655	0.00416503	0.150302	0.520257	0.335745	0.0304552	0.109472	0.640124		-	-	-	-	-	-	-	-	-	-	-	-	-	-	-	-	-	-	0.552422	8.66093e-13	yes
302	198.018	6927.69	yes	product	no	yes	O-Phospho-L-homoserine	C01102	yes	no	Amino Acids and Derivatives	4	C01102; C05702; C12147; C12215	C4H10NO6P	0.364302	0.00491181	0.317746	3.37337e-05	0.336984	3.15083e-08	0.436639	0.000139522	CL;hive	-	-	-	-	1.64284	3.947e-06	-	-	-	-	-	-	-	-	2.35673	4.51954e-07	-	-	2.57343	8.7318e-15	yes
303	198.04	5235.89	yes	product	no	no	Clavulanic acid	C06662	yes	no	Lactams	2	C06662; C11833	C8H9NO5	0.423278	0.00271145	0.285995	0.000697151	0.334494	8.13846e-07	0.285024	0.0467452	CL;hive	-	-	-	-	1.63095	4.76442e-05	-	-	-	-	-	-	-	-	1.62485	0.00467832	-	-	3.09538	3.12073e-12	yes
304	198.089	3629.05	no	no	no	no	gamma-Glutamyl-beta-aminopropiononitrile	C06114	no	no	Carboxylic Acids and Derivatives	1	C06114	C8H13N3O3	0.175613	0.00612447	0.143155	0.0270812	0.152964	0.000572325	-0.0298311	0.675327	B	-	-	2.82202	1.11e-08	-	-	-	-	-	-	-	-	-	-	-	-	-	-	3.01704	1.51366e-11	no
305	198.114	6780.28	no	no	no	yes	Tussilagine	C10411	yes	no	Alkaloids	2	C10411; C12448	C10H17NO3	0.642415	0.011342	0.855253	1.74582e-05	0.752682	2.84409e-07	-0.595433	0.00406606	B;CL;F5	-	-	1.53483	0.00232394	1.84591	2.01812e-07	-	-	1.323	0.01517	-	-	-	-	-	-	-	-	3.58113	7.42936e-06	yes
306	199.025	10973.8	no	no	no	no	4-Maleylacetoacetate	C01036	no	no	Keto-Acids and Derivatives	7	C01036; C01061; C04642; C04783; C05592; C06318; C18314	C8H8O6	0.503053	0.000916426	-1.23235	0.269117	-0.793651	0.321627	-1.41849	0.209801		-	-	-	-	-	-	-	-	-	-	-	-	-	-	-	-	-	-	1.25045	1.98097e-14	yes
307	199.073	13547.4	no	no	no	yes	Dihydroclavaminic acid	C06659	no	no	-	2	C06659; C17360	C8H12N2O4	-0.251275	0.0245822	-0.38697	0.00191053	-0.337904	4.90131e-05	-0.679785	4.12026e-05	CL;F5;hive	-	-	-	-	-0.978037	0.035863	-	-	-1.69153	0.0012614	-	-	-	-	-1.56202	0.00395981	-	-	1.76577	3.53577e-13	yes
308	201.017	13643.6	no	no	no	no	D-Erythritol 4-phosphate	C03494	no	no	-	1	C03494	C4H11O7P	-0.158683	0.427036	0.317269	0.0410893	0.149235	0.214586	0.0943505	0.511534	F5	-	-	-	-	-	-	-	-	1.54999	0.0369722	-	-	-	-	-	-	-	-	0.63062	1.7102e-10	yes
309	201.032	9931.92	no	no	no	yes	Chlorphenesin	C07928	no	no	Ethers	1	C07928	C9H11ClO3	0.140284	0.123386	0.31767	5.76415e-05	0.270874	0.000198216	1.17077	6.39911e-14	CL;hive	-	-	-	-	0.713259	3.10706e-05	-	-	-	-	-	-	-	-	3.62346	1.53221e-11	-	-	-0.0621675	0.280154	no
310	201.055	6715.39	yes	product	no	yes	2,2',3-Trihydroxybiphenyl	C03569	no	no	-	4	C03569; C18750; C20805; C20856	C12H10O3	0.343823	0.00434498	0.498907	3.71996e-07	0.452447	5.16628e-09	0.508846	0.000499834	CL;F5;hive	-	-	-	-	2.12817	1.57764e-11	-	-	1.47354	6.03595e-05	-	-	-	-	2.17849	2.68369e-09	-	-	0.946434	4.9551e-09	no
311	201.078	16237	yes	product	no	no	Metamitron	C10930	no	no	-	1	C10930	C10H10N4O	0.986402	0.000542565	1.35052	4.79039e-06	1.23163	9.61053e-09	2.53553	0.0104379	CL;hive	-	-	-	-	1.13562	1.79899e-07	-	-	-	-	-	-	-	-	3.51512	1.53221e-11	-	-	0.392074	0.000343767	no
312	201.089	29507.3	yes	product	no	no	Proclavaminic acid	C06658	yes	no	-	2	C06658; C08271	C8H14N2O4	0.63951	0.00469502	0.833488	0.000186855	0.775029	2.11891e-06	2.05886	0.0157374	CL;hive	-	-	-	-	0.837479	0.0023818	-	-	-	-	-	-	-	-	3.39129	1.53254e-11	-	-	2.03898	8.31256e-11	yes
313	201.113	912814	yes	product	yes	yes	Sebacic acid	C08277	no	no	Carboxylic Acids and Derivatives	3	C08277; C14566; C17803	C10H18O4	2.08389	0.000613691	2.42951	0.000106585	2.34166	9.12262e-07	4.19184	0.00969613	CL;hive	-	-	-	-	0.906372	4.70782e-05	-	-	-	-	-	-	-	-	3.56912	1.53221e-11	-	-	1.61418	3.87879e-07	yes
314	202.072	23932.2	no	no	no	no	N2-Acetyl-L-aminoadipate	C12986	yes	no	-	1	C12986	C8H13NO5	0.311937	0.253753	0.165152	0.0494475	0.219065	0.0174057	0.20717	0.0872223	B;F4	-	-	1.26526	0.0326709	-	-	2.00983	3.63519e-05	-	-	-	-	-	-	-	-	-	-	2.82231	4.98931e-12	yes
315	203.083	167540	no	no	no	no	L-Tryptophan	C00078	yes	no	Amino Acids and Derivatives	6	C00078; C00525; C00806; C07839; C10968; C14916	C11H12N2O2	0.212861	0.236312	0.177638	0.229582	0.189614	0.062852	-0.43494	0.0807026		-	-	-	-	-	-	-	-	-	-	-	-	-	-	-	-	-	-	2.95426	1.10099e-15	yes
316	204.031	10525.2	yes	product	no	no	Xanthurenic acid	C02470	no	no	Amino Acids and Derivatives	3	C02470; C05663; C08480	C10H7NO4	0.581575	0.000339433	0.749262	0.000108589	0.696377	4.2567e-07	0.98984	0.0130908	CL;F5;hive	-	-	-	-	1.81511	1.01179e-07	-	-	1.1714	0.0342531	-	-	-	-	2.62822	5.94453e-09	-	-	1.06892	4.84795e-08	no
317	204.052	9943.29	no	no	no	no	Lipoamide	C00248	yes	no	Thiolanes	1	C00248	C8H15NOS2	0.120819	0.116451	-0.167695	0.460964	-0.0643344	0.667414	-0.194798	0.494087		-	-	-	-	-	-	-	-	-	-	-	-	-	-	-	-	-	-	2.87503	2.57711e-11	yes
318	204.067	13170.6	no	no	no	yes	Indolelactate	C02043	no	no	Indoles	4	C02043; C05660; C09961; C10741	C11H11NO3	0.604267	0.0144911	1.37657	0.0331636	1.14838	0.0105353	0.378366	0.00222974	F4	-	-	-	-	-	-	3.02038	1.99e-10	-	-	-	-	-	-	-	-	-	-	1.04517	2.43367e-10	yes
319	204.086	40355.9	yes	substrate	no	yes	N-Acetyl-D-fucosamine	C15480	no	no	-	2	C15480; C15481	C8H15NO5	-0.496875	3.95083e-05	-0.419868	0.000110501	-0.445109	7.98699e-09	-0.476147	3.24962e-05	CL;Fp;hive	-	-	-	-	-1.3465	0.00637512	-	-	-	-	-1.61888	0.00151247	-	-	-1.499	0.0386581	-	-	3.36584	3.84457e-15	no
320	204.999	11419.9	no	no	no	no	3-Oxalomalate	C01990	no	no	-	1	C01990	C6H6O8	0.158819	0.0925395	0.137539	0.0900902	0.15473	0.0225198	-0.301444	0.092453	A1	-1.97419	5.57e-05	-	-	-	-	-	-	-	-	-	-	-	-	-	-	-	-	1.83532	7.19399e-15	yes
321	205.036	81784.4	no	no	no	no	(R)-2-Hydroxybutane-1,2,4-tricarboxylate	C00725	yes	no	Carboxylic Acids and Derivatives	6	C00725; C01251; C02225; C04593; C05662; C16241	C7H10O7; C8H14O2S2	0.313432	0.06953	0.18796	0.133143	0.234665	0.0115651	0.069084	0.786695	S	-	-	-	-	-	-	-	-	-	-	-	-	-	-	-	-	1.17382	0.0435822	4.23016	3.41165e-11	yes
322	205.124	7062.85	no	no	no	yes	Ibuprofen	C01588	no	no	Prenol Lipids	2	C01588; C02185	C13H18O2	-0.146571	0.0950063	0.0419387	0.522219	-0.0165191	0.763286	1.63761	0.000625556	hive	-	-	-	-	-	-	-	-	-	-	-	-	-	-	3.83125	1.53e-11	-	-	0.259762	0.00151098	no
323	205.16	128746	no	no	no	no	alpha-Irone	C09690	no	no	Prenol Lipids	4	C09690; C11350; C14132; C14205	C14H22O	-0.0292445	0.781782	-0.107494	0.157756	-0.0723233	0.275081	-0.178485	0.0265347	F5	-	-	-	-	-	-	-	-	-1.63327	0.00873456	-	-	-	-	-	-	-	-	-1.07729	4.41638e-11	yes
324	206.049	37628.6	no	no	no	yes	S-(2-Hydroxyethyl)-N-acetyl-L-cysteine	C14876	yes	no	-	1	C14876	C7H13NO4S	0.255193	0.176146	0.0697451	0.505085	0.135616	0.104013	-0.927486	5.11434e-05	A1;B;Fp;hive;S	-1.64612	1.23932e-06	1.01209	0.00848511	-	-	-	-	-	-	0.763981	0.0225726	-	-	-1.79533	1.27074e-07	-1.36005	1.15963e-06	2.13536	3.32919e-08	yes
325	206.082	15785.1	no	no	no	no	N-Acetyl-L-phenylalanine	C03519	yes	no	Amino Acids and Derivatives	5	C03519; C05620; C09933; C09986; C20126	C11H13NO3	0.745833	0.0331299	0.849576	3.46478e-05	0.802278	1.27321e-06	-0.281401	0.100947	CL	-	-	-	-	1.99781	2.66e-11	-	-	-	-	-	-	-	-	-	-	-	-	3.64208	2.77541e-12	yes
326	207.012	15838.6	no	no	no	no	1-Naphthalenesulfonic acid	C16201	no	no	-	2	C16201; C16202	C10H8O3S	0.0797406	0.416168	0.492962	0.0467191	0.392449	0.0423826	-0.307817	0.244707	CL	-	-	-	-	1.19394	0.0446678	-	-	-	-	-	-	-	-	-	-	-	-	0.865841	5.23371e-07	yes
327	207.033	14174.7	yes	product	no	no	2-(2'-Methylthio)ethylmalic acid	C17210	no	no	-	2	C17210; C17212	C7H12O5S	0.402666	0.00518988	0.626441	4.43893e-07	0.549979	2.5727e-09	-0.026913	0.78801	CL;F5	-	-	-	-	1.59325	1.05846e-10	-	-	3.4407	1.53225e-11	-	-	-	-	-	-	-	-	1.55152	6.65799e-11	yes
328	207.078	21080.4	yes	substrate	no	yes	L-Kynurenine	C00328	no	no	Amino Acids and Derivatives	3	C00328; C01718; C05647	C10H12N2O3	-1.7477	1.69907e-06	-1.1926	2.11073e-07	-1.42239	4.41793e-11	-1.85489	2.85461e-08	CL;F4;hive	-	-	-	-	-1.80783	2.04173e-11	-2.34512	2.3597e-11	-	-	-	-	-	-	-2.32548	2.65674e-11	-	-	1.31366	5.57129e-06	no
329	207.139	8505.72	no	no	no	yes	4-Heptyloxyphenol	C14236	no	no	-	1	C14236	C13H20O2	0.325845	0.0214512	0.412347	0.00015029	0.380473	1.96335e-06	0.879786	0.00558883	B;CL;hive	-	-	2.0052	1.1407e-09	1.16646	2.24333e-06	-	-	-	-	-	-	-	-	2.9619	1.53432e-11	-	-	-0.519798	3.71384e-07	no
330	208.061	62676	no	no	no	yes	N-Benzyloxycarbonylglycine	C03710	yes	no	-	3	C03710; C05596; C16591	C10H11NO4	0.345037	0.0892287	0.162118	0.0562603	0.225391	0.00706991	-0.31438	0.00294177	hive	-	-	-	-	-	-	-	-	-	-	-	-	-	-	-1.55499	0.0132724	-	-	5.8868	5.03949e-10	yes
331	208.109	6618.18	no	no	no	no	4-(Methylnitrosamino)-1-(3-pyridyl)-1-butanol	C19574	no	no	-	1	C19574	C10H15N3O2	0.0876626	0.70977	0.201758	0.14418	0.120145	0.44983	2.62268	0.0201953	hive	-	-	-	-	-	-	-	-	-	-	-	-	-	-	3.52209	1.53e-11	-	-	1.49057	1.32351e-09	no
332	209.03	69676.7	no	no	no	yes	D-Glucarate	C00818	yes	no	Sugar Acids and Derivatives	2	C00818; C00879	C6H10O8	-0.620422	1.03272e-05	-0.336844	0.0249442	-0.467409	9.70634e-05	-1.04238	0.00353656	hive;S	-	-	-	-	-	-	-	-	-	-	-	-	-	-	-1.60747	0.00150561	1.24032	0.00384137	3.91019	5.35879e-07	yes
333	209.067	214037	yes	substrate	yes	yes	Sedoheptulose	C02076	yes	no	Monosaccharides	4	C02076; C08236; C08355; C19612	C7H14O7	-2.97723	1.26736e-05	-2.25111	6.5053e-08	-2.48973	9.27052e-14	-1.70945	6.61023e-07	CL;F5;hive	-	-	-	-	-1.98542	1.53403e-11	-	-	-2.07937	1.73562e-11	-	-	-	-	-1.74485	9.75669e-10	-	-	4.24351	5.813e-11	yes
334	209.082	37025.3	yes	substrate	no	yes	Sinapyl alcohol	C02325	yes	no	Phenols and Derivatives	3	C02325; C07350; C10709	C11H14O4	-1.39502	2.03385e-05	-1.1099	2.7254e-07	-1.21605	2.02368e-12	3.93363	0.00610147	hive	-	-	-	-	-	-	-	-	-	-	-	-	-	-	3.69392	1.53e-11	-	-	2.41745	1.27443e-09	yes
335	210.032	16844.4	no	no	no	no	p-Chloroacetoacetanilide	C14266	no	no	-	1	C14266	C10H10ClNO2	-0.466597	0.00273796	-0.184224	0.176065	-0.306603	0.0031443	0.229021	0.214662	S	-	-	-	-	-	-	-	-	-	-	-	-	-	-	-	-	1.38218	0.00628311	1.68988	3.78132e-08	no
336	210.063	7733.54	yes	substrate	no	yes	6-Carboxy-5,6,7,8-tetrahydropterin	C20239	no	no	-	1	C20239	C7H9N5O3	-0.951998	6.62158e-06	-0.572663	3.31528e-06	-0.703575	6.15459e-12	-0.48247	0.00279667	CL;F5;G;hive	-	-	-	-	-1.79261	1.24131e-09	-	-	-2.25331	5.08373e-09	-	-	-1.06312	0.0183864	-1.55527	6.06686e-05	-	-	2.73005	6.53785e-11	no
337	210.114	11941.9	yes	product	no	yes	Mescaline	C06546	yes	no	Alkaloids	5	C06546; C07056; C07144; C07513; C11703	C11H17NO3	1.36254	9.78574e-05	1.12228	2.5137e-07	1.20883	2.19064e-12	-1.78704	5.24931e-05	CL;F5;hive	-	-	-	-	1.75683	1.00285e-09	-	-	1.59294	2.13561e-05	-	-	-	-	-1.06021	0.0141427	-	-	6.02782	3.83373e-12	yes
338	210.15	1805.32	yes	substrate	no	yes	Elaeokanine C	C10592	no	no	Alkaloids	1	C10592	C12H21NO2	-1.31082	0.00309091	-1.31762	3.46478e-05	-1.30177	9.26783e-08	-1.57458	1.31813e-05	B;CL;F4;hive	-	-	-1.49984	0.000684614	-1.31151	5.48874e-05	-1.68088	9.03221e-05	-	-	-	-	-	-	-1.45487	0.00111094	-	-	0.927766	2.26797e-09	no
339	211.001	35400.9	no	no	no	yes	2-Phosphinomethylmalate	C17947	yes	no	-	1	C17947	C5H9O7P	-0.596475	0.012527	-0.471031	0.000206986	-0.5313	7.83545e-06	-0.879891	7.25909e-05	CL;Fp;hive	-	-	-	-	-0.992457	0.000159741	-	-	-	-	-1.8325	1.44281e-10	-	-	-1.6268	1.36273e-06	-	-	3.68496	7.28443e-11	yes
340	211.061	29275.6	no	no	no	yes	Danielone	C10674	no	no	Phenols and Derivatives	2	C10674; C11155	C10H12O5	0.190674	0.248584	0.231999	0.0734269	0.216647	0.0174556	0.589289	0.000735607	F5;hive	-	-	-	-	-	-	-	-	2.28066	2.49392e-06	-	-	-	-	1.82589	0.000257871	-	-	1.61665	1.72386e-11	yes
341	211.083	41769.5	no	no	no	yes	Perseitol	C08255	yes	no	Fatty Alcohols	2	C08255; C08260	C7H16O7	0.636198	0.0285663	0.396742	0.0210517	0.478804	0.00196253	-1.32153	3.18399e-08	CL;F5;G;hive	-	-	-	-	0.690527	0.0267371	-	-	1.11666	0.00217784	-	-	2.71155	1.54815e-11	-1.30869	0.000161178	-	-	5.84686	1.22237e-05	yes
342	211.098	21924.8	no	no	no	yes	7-Deoxyloganetin	C20790	yes	no	-	1	C20790	C11H16O4	0.0340543	0.815379	-0.0808244	0.464759	-0.0452533	0.594119	-1.51449	8.69026e-07	A1;hive	-1.74229	3.15988e-05	-	-	-	-	-	-	-	-	-	-	-	-	-2.12648	2.82079e-07	-	-	2.30124	6.25391e-08	yes
343	211.134	45925.2	no	no	no	yes	Cucurbic acid	C08482	no	no	-	4	C08482; C08509; C16309; C16311	C12H20O3	-0.20823	0.0775985	-0.300083	0.0295653	-0.264926	0.00391936	-1.08705	1.20689e-05	F4;F5;hive	-	-	-	-	-	-	1.1706	0.049834	-1.34152	0.0128095	-	-	-	-	-2.13495	4.88042e-06	-	-	0.0743276	0.366641	yes
344	212.056	7757.44	no	no	no	no	N,N-Dihydroxy-L-tyrosine	C15503	yes	no	-	1	C15503	C9H11NO5	0.0852846	0.299565	0.16585	0.0353629	0.13203	0.0168288	0.0448608	0.682798	S	-	-	-	-	-	-	-	-	-	-	-	-	-	-	-	-	1.30747	0.0363074	3.59123	1.53851e-11	yes
345	212.129	5717.21	no	no	no	yes	N-Heptanoylhomoserine lactone	C11844	no	no	-	1	C11844	C11H19NO3	-0.164465	0.185319	-0.0960628	0.438938	-0.130636	0.124638	-1.25905	4.7697e-06	F4;hive	-	-	-	-	-	-	-1.61906	0.000991455	-	-	-	-	-	-	-2.37691	3.20994e-07	-	-	1.1884	6.07844e-10	no
346	213.017	11576.8	no	no	no	no	2-Deoxy-D-ribose 1-phosphate	C00672	yes	no	Monosaccharides	4	C00672; C00673; C11437; C16637	C5H11O7P	0.128868	0.239923	0.0927033	0.284835	0.108266	0.0887577	-0.0398935	0.791733		-	-	-	-	-	-	-	-	-	-	-	-	-	-	-	-	-	-	3.96914	1.0796e-06	yes
347	213.055	7341.39	no	no	no	no	3,4-Dihydroxy-3,4-dihydro-9-fluorenone	C07722	no	no	-	10	C07722; C08455; C14163; C14215; C14220; C14284; C14507; C16262; C19404; C19405	C13H10O3	-0.0393185	0.809038	0.376989	0.000136887	0.20432	0.0228685	0.425924	0.306358	CL;F4	-	-	-	-	1.10451	0.030014	2.08532	0.000214202	-	-	-	-	-	-	-	-	-	-	1.45733	3.73541e-11	no
348	213.078	7143.7	no	no	no	no	N-Hydroxy-IQ	C20289	no	no	-	1	C20289	C11H10N4O	0.145548	0.182501	0.433879	0.00515534	0.330803	0.0013218	0.143944	0.162976	B;CL	-	-	1.54594	0.0182257	1.85525	1.22918e-05	-	-	-	-	-	-	-	-	-	-	-	-	1.05757	3.08114e-11	no
349	213.124	14822.4	yes	substrate	no	yes	Dethiobiotin	C01909	no	no	Fatty Acids and Conjugates	1	C01909	C10H18N2O3	-1.00939	1.93655e-05	-1.15703	0.00194087	-1.10813	2.27094e-06	-1.066	0.00266737	CL;F4;F5;hive	-	-	-	-	-1.47214	1.80878e-05	-1.81399	6.85362e-05	-1.47487	0.00228889	-	-	-	-	-1.39419	0.00494373	-	-	2.39179	4.02227e-13	no
350	213.15	75313.1	yes	product	no	no	3-Oxododecanoic acid	C02367	no	no	Fatty Acids and Conjugates	1	C02367	C12H22O3	1.18898	0.000629053	1.47606	8.43686e-08	1.40498	2.27724e-09	1.21419	0.0489422	CL;F5;hive	-	-	-	-	2.30613	1.53252e-11	-	-	1.71253	1.34151e-08	-	-	-	-	1.70849	1.43983e-08	-	-	0.065553	0.368627	no
351	214.049	260809	no	no	no	no	sn-Glycero-3-phosphoethanolamine	C01233	yes	no	Organic Phosphoric Acids and Derivatives	1	C01233	C5H14NO6P	0.555882	0.011699	0.161684	0.0692617	0.304184	0.00107895	0.795808	0.102074	hive	-	-	-	-	-	-	-	-	-	-	-	-	-	-	1.98178	0.00142578	-	-	3.20152	5.04357e-16	yes
352	214.072	13028.8	no	no	no	yes	Succinylproline	C11711	yes	no	-	1	C11711	C9H13NO5	-0.0682956	0.697613	-0.0839505	0.314529	-0.0868464	0.268419	-0.783564	1.77236e-06	hive	-	-	-	-	-	-	-	-	-	-	-	-	-	-	-2.14021	1.83e-05	-	-	3.47444	7.65076e-12	yes
353	214.109	37470	yes	substrate	no	yes	2-Amino-9,10-epoxy-8-oxodecanoic acid	C12027	yes	no	-	1	C12027	C10H17NO4	-0.296913	0.00785958	-0.405331	0.00163308	-0.368072	1.38667e-05	-1.58299	2.59025e-07	CL;F4;G;hive	-	-	-	-	-0.898462	0.00217039	-1.60428	7.76363e-06	-	-	-	-	-1.48355	4.17375e-05	-2.44375	5.33793e-11	-	-	2.66911	1.26544e-07	yes
354	215.033	431906	no	no	no	no	2-C-Methyl-D-erythritol 4-phosphate	C11434	yes	no	-	1	C11434	C5H13O7P	1.07416	0.000204379	-0.0702493	0.740429	0.307949	0.0727844	-0.671986	0.0173828	A1;Fp	-1.99495	0.00106432	-	-	-	-	-	-	-	-	-1.19863	0.0472881	-	-	-	-	-	-	4.3906	5.15204e-06	yes
355	215.104	18657.3	no	no	no	no	gamma-Glutamyl-gamma-aminobutyraldehyde	C15700	yes	no	-	1	C15700	C9H16N2O4	-0.138778	0.275398	-0.393512	0.0166132	-0.30325	0.00376645	-0.0193431	0.940164	B	-	-	2.15932	0.000204874	-	-	-	-	-	-	-	-	-	-	-	-	-	-	2.02843	5.73918e-10	yes
356	215.166	189429	yes	substrate	no	yes	12-Hydroxydodecanoic acid	C08317	no	no	Fatty Acids and Conjugates	1	C08317	C12H24O3	-1.22675	9.83608e-05	-0.503789	0.00477935	-0.650029	0.000365472	-2.4591	3.31093e-08	A1;B;CL;F4;F5;hive;S	-1.00475	0.0269573	-1.88075	5.05042e-07	-0.928759	0.00262755	-1.08792	0.0114993	1.01551	0.0242281	-	-	-	-	-2.57798	4.50676e-11	-1.29338	3.41149e-05	0.299407	0.00176472	no
357	216.051	11629.2	yes	product	no	yes	2-(Hydroxymethyl)-3-(acetamidomethylene)succinate	C04690	yes	no	-	1	C04690	C8H11NO6	0.400589	0.00282967	0.372285	9.80799e-05	0.384014	1.01793e-07	0.746371	0.00699086	CL;hive	-	-	-	-	1.3756	7.0497e-06	-	-	-	-	-	-	-	-	3.16597	1.55652e-11	-	-	3.18469	1.10734e-10	yes
358	216.067	4873.92	yes	product	no	yes	(S)-beta-Methylindolepyruvate	C03914	no	no	-	2	C03914; C05644	C12H11NO3	0.281971	2.77764e-05	0.237269	0.000181573	0.250953	2.27757e-08	0.287445	0.000961986	CL;G;hive	-	-	-	-	1.59215	5.62417e-05	-	-	-	-	-	-	1.37422	0.0267479	1.96371	0.000189873	-	-	1.97619	1.57067e-11	no
359	216.099	9385.17	no	no	no	no	N-Acetyl-L-citrulline	C15532	yes	no	Amino Acids and Derivatives	1	C15532	C8H15N3O4	0.0789507	0.385423	-0.0787911	0.383356	-0.0265969	0.703978	-0.116413	0.31466	F4;G	-	-	-	-	-	-	-2.16337	3.97131e-06	-	-	-	-	1.63569	0.000934915	-	-	-	-	3.19575	5.07709e-13	yes
360	216.124	23982.8	yes	substrate	no	yes	O-Propanoylcarnitine	C03017	no	no	Fatty Acid Esters	1	C03017	C10H19NO4	-1.31438	3.20475e-06	-1.50542	7.42639e-07	-1.43621	3.66183e-12	-2.1099	1.78392e-07	B;CL;F4;Fp;G;hive;S	-	-	-1.66418	2.71748e-08	-2.03186	1.53527e-11	-2.37219	1.55199e-11	-	-	-1.12693	4.69048e-06	-1.53465	2.62848e-07	-2.41003	1.54513e-11	-0.672563	0.0219577	2.44992	8.80513e-07	no
361	216.135	17889.5	no	no	no	yes	beta-Alanyl-L-lysine	C05341	yes	no	Carboxylic Acids and Derivatives	2	C05341; C15699	C9H19N3O3	0.075338	0.528407	-0.117627	0.274444	-0.0479532	0.535038	-0.736802	3.49405e-06	Fp;hive	-	-	-	-	-	-	-	-	-	-	-1.7298	1.38292e-05	-	-	-2.10244	1.33724e-05	-	-	2.37006	5.65654e-10	yes
362	217.084	26726.2	no	no	no	no	gamma-L-Glutamyl-D-alanine	C03738	no	no	-	1	C03738	C8H14N2O5	-0.0443048	0.667492	0.156692	0.0237807	0.0793659	0.147775	0.0179304	0.895566	G	-	-	-	-	-	-	-	-	-	-	-	-	2.07339	0.000412886	-	-	-	-	1.96927	2.33011e-16	yes
363	217.1	23126.3	yes	product	no	no	N-Acetylserotonin	C00978	no	no	Indoles	5	C00978; C02983; C07371; C16831; C20130	C12H14N2O2	0.178227	0.00494939	0.264416	0.00560421	0.242587	0.000435966	0.906047	0.0473696	hive	-	-	-	-	-	-	-	-	-	-	-	-	-	-	2.20308	0.000256809	-	-	1.13241	1.14124e-12	no
364	217.119	78882.9	yes	substrate	no	yes	D-Lysopine	C04020	yes	no	-	1	C04020	C9H18N2O4	-0.89629	0.00093336	-0.908783	1.59733e-05	-0.920238	3.27891e-09	-0.877338	0.00319484	B;CL;F4;F5;Fp;hive	-	-	0.914449	0.0433298	-1.55463	1.45551e-08	-0.948816	0.0307423	-1.66124	3.69097e-06	-1.14527	0.000156373	-	-	-1.51559	2.83913e-05	-	-	2.52545	4.48473e-15	yes
365	218.104	150645	yes	substrate	no	yes	Pantothenate	C00864	yes	no	Amines	1	C00864	C9H17NO5	-1.52233	1.09309e-07	-1.24523	7.12834e-07	-1.31342	1.21203e-11	-2.02167	1.85738e-08	B;CL;F4;F5;Fp;G;hive	-	-	-1.79437	1.79442e-07	-1.69008	2.79902e-10	-1.37256	8.94139e-05	0.907596	0.0314425	-1.53537	6.30261e-08	-1.38973	7.01705e-05	-2.20331	3.65363e-10	-	-	2.32862	5.77992e-15	yes
366	218.122	16583.9	yes	substrate	no	yes	Pentahomomethionine	C17229	no	no	-	1	C17229	C10H21NO2S	-0.96418	4.50833e-05	-0.936939	4.28913e-07	-0.953282	2.18693e-13	-1.13388	7.28312e-06	CL;F4;F5;Fp;G;hive	-	-	-	-	-2.05376	1.53796e-11	-1.4731	3.59361e-06	-0.804151	0.046198	-1.66023	5.07553e-10	-0.897352	0.0156497	-2.34033	1.77877e-11	-	-	1.91018	1.10099e-15	no
367	219.078	18527.5	yes	product	no	yes	5-Hydroxy-L-tryptophan	C00643	no	no	Amino Acids and Derivatives	4	C00643; C01017; C09985; C19716	C11H12N2O3	0.544779	0.000576438	0.475582	0.000194548	0.499696	1.29248e-07	0.362749	0.00035115	CL;F4;F5;hive	-	-	-	-	1.82702	2.59453e-07	1.74126	0.000308254	1.32488	0.0147782	-	-	-	-	1.33758	0.0132848	-	-	0.515562	3.23322e-10	yes
368	219.139	8062.95	no	no	no	no	Oblongolide	C09519	no	no	-	2	C09519; C09673	C14H20O2	-0.121232	0.232414	-0.125464	0.109402	-0.119109	0.0420564	-0.0525317	0.466534	F4;F5	-	-	-	-	-	-	-1.58843	0.0114333	-1.89677	0.00103588	-	-	-	-	-	-	-	-	0.530496	5.09012e-10	no
369	220.049	7962.94	no	no	no	no	L-Histidinol phosphate	C01100	no	no	-	1	C01100	C6H12N3O4P	0.0924726	0.0628195	0.0493244	0.356637	0.068861	0.081001	-0.159823	0.0731254	A1	-1.52785	0.0376141	-	-	-	-	-	-	-	-	-	-	-	-	-	-	-	-	1.69876	2.64634e-06	yes
370	220.083	24992	yes	substrate	no	yes	N-Acetyl-D-glucosamine	C00140	no	no	Monosaccharides	9	C00140; C00645; C01132; C02587; C02711; C03136; C03878; C05021; C20328	C8H15NO6; C9H11N5O2	-0.805791	0.00131274	-0.807226	1.02126e-05	-0.794924	1.72833e-08	-1.07133	4.63908e-06	CL;F5;hive	-	-	-	-	-1.70078	1.75821e-09	-	-	-2.22037	2.18789e-09	-	-	-	-	-2.08021	1.62408e-08	-	-	1.84137	6.88962e-10	yes
371	220.109	5592.17	yes	substrate	no	yes	Formetanate	C18668	no	no	-	1	C18668	C11H15N3O2	-0.453869	1.57301e-06	-0.461829	2.12367e-06	-0.453955	1.49578e-10	-0.624204	2.99289e-08	B;CL;F4;Fp;G;hive	-	-	-1.49569	0.000151954	-1.89963	2.54634e-10	-1.90858	7.11835e-07	-	-	-1.36387	2.01421e-05	-1.46536	0.000220975	-2.43559	5.68148e-10	-	-	0.732835	1.86952e-12	no
372	221.046	37250.9	no	no	no	yes	2-Succinylbenzoate	C02730	yes	no	-	8	C02730; C09271; C10496; C12264; C14106; C14107; C17479; C17480	C11H10O5	-0.18969	0.0230026	-0.259437	0.000770361	-0.223432	0.00303223	-0.576407	1.0161e-06	A1;B;CL;F4;F5;G;hive;S	-2.05416	1.85161e-05	-1.57179	0.00219548	-1.36529	0.000260959	-1.58747	0.00190064	-1.68249	0.000777968	-	-	-1.32089	0.0191224	-2.73221	1.19792e-08	-1.01888	0.0368354	2.41481	1.84716e-15	yes
373	221.067	64713.8	no	no	no	no	6-Acetyl-D-glucose	C02655	yes	no	-	1	C02655	C8H14O7	-0.0888623	0.363822	-0.412887	8.00359e-05	-0.298243	0.000799137	-0.478037	0.0731493	A1;CL;Fp;G;hive	-1.53572	0.0122605	-	-	-1.74836	1.77254e-05	-	-	-	-	-1.56433	0.000656358	-1.80105	0.0014994	-1.98134	0.000318634	-	-	4.63046	1.48936e-11	yes
374	221.119	24261.2	yes	substrate	no	no	Dehydrovomifoliol	C02533	no	no	-	2	C02533; C04223	C13H18O3	-0.563018	0.000294549	-0.508092	0.000398553	-0.512558	2.97086e-06	-0.191137	0.114637	A1;CL;F4;F5;Fp;G;S	-1.22573	0.00581122	-	-	-1.50194	7.33518e-07	-2.28171	1.31805e-08	-2.77644	3.52905e-11	-2.1359	2.36995e-10	-1.90328	1.83428e-06	-	-	-1.35887	4.51152e-05	0.289215	9.58781e-06	yes
375	221.155	38979.5	yes	substrate	no	yes	Rishitin	C09715	no	no	Prenol Lipids	3	C09715; C16977; C16983	C14H22O2	-0.835123	6.62158e-06	-0.55093	0.000139899	-0.611852	1.90492e-06	-1.41409	2.59025e-07	CL;F4;G;hive	-	-	-	-	-1.36496	6.71766e-07	-0.935139	0.0379623	-	-	-	-	-0.980954	0.0238877	-2.68654	1.71209e-11	-	-	-0.628723	1.48964e-10	yes
376	221.191	3277.03	no	no	no	yes	(2E,6E)-Farnesol	C01126	no	no	Prenol Lipids	30	C01126; C03220; C09621; C09628; C09631; C09651; C09663; C09664; C09676; C09682; C09698; C09704; C09705; C16143; C16813; C16970; C17124; C18245; C19743; C19744; C19746; C19755; C19756; C19893; C19974; C20172; C20181; C20184; C20479; C20576	C15H26O	-0.284863	0.000311942	-0.175025	0.0292444	-0.211228	0.000129454	-0.504152	1.96138e-05	B;CL;F4;hive	-	-	-1.36723	0.00641087	-0.875413	0.0410639	-2.06276	4.3924e-06	-	-	-	-	-	-	-2.25984	4.60123e-07	-	-	-0.285098	5.42323e-06	no
377	222.077	17264.9	no	no	no	no	Bendiocarb	C14433	yes	no	-	2	C14433; C18953	C11H13NO4	0.192426	0.221353	0.337349	0.000619279	0.290715	0.000250139	0.024958	0.81044	CL	-	-	-	-	1.5884	7.25e-07	-	-	-	-	-	-	-	-	-	-	-	-	2.52749	3.78866e-11	yes
378	223.134	23080.8	no	no	no	no	(6S,9R)-Vomifoliol	C01760	no	no	-	4	C01760; C04166; C11512; C16318	C13H20O3	0.0717963	0.501895	0.354115	0.0106147	0.237487	0.011096	0.104312	0.481278	B;S	-	-	2.93247	1.89108e-11	-	-	-	-	-	-	-	-	-	-	-	-	1.55542	2.69075e-06	0.486546	8.19821e-06	yes
379	224.056	12091.7	no	no	no	no	4-Amino-4-deoxychorismate	C11355	yes	no	-	2	C11355; C18054	C10H11NO5	0.322675	0.0803154	1.07133	0.0827356	0.882312	0.0507032	-0.084424	0.339297	CL	-	-	-	-	1.35047	0.0153736	-	-	-	-	-	-	-	-	-	-	-	-	4.38587	5.40581e-09	yes
380	224.104	4714.3	yes	product	no	no	1-(Methylnitrosoamino)-4-(3-pyridinyl)-1,4-butanediol	C19577	no	no	-	3	C19577; C19580; C19603	C10H15N3O3	0.486457	0.00026547	0.472836	1.1247e-06	0.472544	2.14283e-10	0.773337	0.0195775	B	-	-	2.8989	1.79e-08	-	-	-	-	-	-	-	-	-	-	-	-	-	-	2.01918	8.87712e-10	no
381	225.077	19934.5	no	no	no	no	Genipin	C09780	no	no	Prenol Lipids	1	C09780	C11H14O5	0.88142	0.0413305	0.453834	3.55119e-06	0.613333	0.000476638	1.3209	0.0184647	F5;hive	-	-	-	-	-	-	-	-	2.22336	3.21769e-07	-	-	-	-	2.48891	1.32672e-08	-	-	1.20337	2.92288e-11	no
382	225.088	57504.2	no	no	no	no	Porphobilinogen	C00931	yes	no	Carboxylic Acids and Derivatives	2	C00931; C06870	C10H14N2O4; C10H14N2O4.	-0.0462752	0.645477	-0.174891	0.0713455	-0.129575	0.0456003	-0.476806	0.0303317	F4;F5;hive	-	-	-	-	-	-	-1.63894	0.00274044	-1.40303	0.0185397	-	-	-	-	-1.77625	0.000818654	-	-	2.68885	7.8815e-09	yes
383	225.113	36498	no	no	no	no	Butopyronoxyl	C19142	no	no	-	1	C19142	C12H18O4	-0.228609	0.133108	-0.134672	0.295164	-0.174755	0.0565421	-0.151585	0.394914	B;F4;F5;G	-	-	2.92272	1.53243e-11	-	-	0.902	0.00359538	-1.30006	4.54986e-06	-	-	0.968724	0.00128364	-	-	-	-	1.82177	1.7916e-12	yes
384	225.186	5355.15	no	no	no	no	Myristoleic acid	C08322	no	no	Fatty Acids and Conjugates	1	C08322	C14H26O2	-0.454387	0.00161529	-0.12436	0.227661	-0.251212	0.00219057	-0.252083	0.0213879	B;F4;G	-	-	-1.5382	0.00396444	-	-	-2.01379	4.33655e-05	-	-	-	-	1.22098	0.0497464	-	-	-	-	-0.0136567	0.904089	no
385	225.222	1268.5	yes	substrate	no	no	Pentadecanal	C01948	no	no	Fatty Aldehydes	1	C01948	C15H30O	-1.65518	0.00625031	-1.01558	0.00160067	-1.27236	1.62044e-05	-0.676042	0.0137338	A1;CL	1.74728	9.18836e-05	-	-	-0.989814	0.00886514	-	-	-	-	-	-	-	-	-	-	-	-	-0.0116437	0.894483	no
386	226.012	6727.67	no	no	no	yes	L-Glutamyl 5-phosphate	C03287	no	no	Amino Acids and Derivatives	3	C03287; C03734; C05765	C5H10NO7P	0.336126	0.011342	0.237904	0.00234436	0.274282	1.3344e-05	-0.222754	0.00678589	CL	-	-	-	-	1.10558	0.0143742	-	-	-	-	-	-	-	-	-	-	-	-	-0.926062	0.00151439	no
387	226.084	39022.8	yes	substrate	no	yes	Deoxycytidine	C00881	yes	no	Pyrimidine Nucleosides and Analogues	1	C00881	C9H13N3O4	-1.36404	1.69907e-06	-1.35654	3.68765e-06	-1.3674	2.15337e-11	-2.45409	1.58276e-07	CL;F5;hive	-	-	-	-	-1.69322	3.60605e-10	-	-	-1.58775	4.99289e-06	-	-	-	-	-2.27114	1.8956e-10	-	-	5.29709	3.57307e-11	yes
388	227.035	13641.2	yes	substrate	no	yes	Euxanthone	C10061	yes	no	Pyrans	1	C10061	C13H8O4	-1.33667	1.26736e-05	-0.896119	6.94716e-05	-1.07152	7.58957e-09	-0.831209	0.000180279	CL;F5;G;hive	-	-	-	-	-1.31357	1.3215e-06	-	-	-1.5039	3.08497e-05	-	-	1.29968	0.00047867	-1.24336	0.0009844	-	-	3.75863	3.93341e-12	yes
389	227.068	13550.7	yes	substrate	no	yes	Deoxyuridine	C00526	yes	no	Pyrimidine Nucleosides and Analogues	1	C00526	C9H12N2O5	-1.15994	4.91352e-07	-1.02243	3.42437e-06	-1.06804	6.1555e-12	-1.04358	1.94071e-06	CL;F4;F5;Fp;G;hive	-	-	-	-	-1.84061	1.53498e-11	-2.11538	1.5577e-11	-1.88686	2.94033e-11	-0.876679	0.00010377	-1.00251	0.000307915	-1.86657	3.61075e-11	-	-	2.31586	2.31317e-07	yes
390	227.071	9995.46	yes	substrate	no	yes	Trioxsalen	C03582	no	Phenylpropanoids, coumarin, typical pollen compound	Stilbenes	9	C03582; C09312; C09314; C09317; C09925; C14285; C14393; C15196; C19538	C14H12O3	-0.708926	1.45607e-05	-0.660736	9.27209e-06	-0.676652	1.18738e-10	-0.476421	0.000408317	CL;F4;F5;Fp;hive	-	-	-	-	-1.57088	6.51394e-09	-1.87631	1.07306e-07	-1.8645	1.27799e-07	-0.7946	0.0222761	-	-	-1.20235	0.00136518	-	-	1.86343	1.13279e-08	yes
391	227.129	73846.1	yes	product	yes	yes	Traumatic acid	C16308	no	no	Fatty Acids and Conjugates	1	C16308	C12H20O4	2.67522	0.000447086	2.5409	1.09823e-05	2.58531	2.31317e-09	3.10228	0.00426702	B;CL;hive	-	-	0.88348	0.0020247	1.90683	1.53365e-11	-	-	-	-	-	-	-	-	3.00208	1.53225e-11	-	-	1.67777	1.26933e-07	yes
392	228.052	8734.21	no	no	no	no	4-(L-Alanin-3-yl)-2-hydroxy-cis,cis-muconate 6-semialdehyde	C04796	no	no	-	3	C04796; C04797; C17758	C9H11NO6	0.0661087	0.370371	0.117759	0.0905069	0.103114	0.0343634	-0.0853247	0.532211		-	-	-	-	-	-	-	-	-	-	-	-	-	-	-	-	-	-	3.37796	7.47012e-14	no
393	228.064	10340	no	no	no	yes	gamma-Fagarine	C10676	no	no	Quinolines and Derivatives	1	C10676	C13H11NO3	-0.173291	0.0228536	-0.230347	0.00139106	-0.208019	4.92577e-05	-0.306783	0.000175864	CL;F5;hive	-	-	-	-	-1.31331	0.000102564	-	-	-2.50866	1.0581e-08	-	-	-	-	-1.70478	0.000130212	-	-	2.33493	1.48522e-11	no
394	229.011	39534	yes	product	no	no	D-Ribose 5-phosphate	C00117	no	no	Monosaccharides	14	C00117; C00199; C00231; C00620; C01101; C01112; C03291; C03736; C03737; C03906; C06238; C06239; C06441; C06814	C5H11O8P	0.682301	0.000332581	0.747749	3.3367e-05	0.728303	2.09869e-08	0.0773648	0.4404	CL;F5	-	-	-	-	2.14182	4.28749e-10	-	-	1.44573	0.00245413	-	-	-	-	-	-	-	-	-0.322776	0.237995	yes
395	229.087	8553.6	no	no	no	yes	Naproxen	C01517	no	no	Acenes	10	C01517; C08762; C09918; C09947; C10253; C10255; C11492; C18080; C18083; C19141	C14H14O3	-0.208033	0.0400958	-0.0571521	0.539307	-0.11505	0.0712375	-0.265456	0.00285869	F4;G	-	-	-	-	-	-	-1.45816	0.0107663	-	-	-	-	1.2609	0.0472671	-	-	-	-	0.461825	0.0042922	no
396	229.145	90372.4	yes	product	yes	no	Dodecanedioic acid	C02678	no	no	Carboxylic Acids and Derivatives	3	C02678; C14523; C19143	C12H22O4	1.45619	0.00539478	1.64406	3.68342e-07	1.58881	1.33488e-09	1.50057	0.0163576	B;CL;F4;hive	-	-	1.28345	3.87345e-05	2.37288	1.53252e-11	1.35763	1.17137e-05	-	-	-	-	-	-	2.04252	1.27412e-10	-	-	1.03565	2.48814e-08	yes
397	230	13428.5	yes	product	no	no	N-Phosphohypotaurocyamine	C03624	no	no	-	1	C03624	C3H10N3O5PS	1.55085	0.000170361	1.68554	7.06101e-07	1.64459	7.83557e-11	0.796916	0.0195775	A1;CL;F5;hive	0.695921	0.0286424	-	-	2.50322	1.53221e-11	-	-	2.03906	1.56534e-11	-	-	-	-	0.832729	0.00354108	-	-	2.15552	1.06925e-07	no
398	230.067	10283.2	yes	product	no	no	N-Acetyl-L-2-amino-6-oxopimelate	C05539	yes	no	-	2	C05539; C05932	C9H13NO6	0.310085	0.00968853	0.429057	9.37657e-05	0.375785	1.72863e-06	0.454753	0.096636	CL;hive	-	-	-	-	1.76094	2.37222e-05	-	-	-	-	-	-	-	-	1.88396	0.00103481	-	-	3.13805	1.36607e-12	yes
399	230.14	10755.6	yes	substrate	no	yes	O-Butanoylcarnitine	C02862	no	no	Fatty Acid Esters	2	C02862; C04301	C11H21NO4	-0.819992	5.97766e-05	-0.826659	2.63843e-06	-0.821405	5.63117e-11	-1.55444	7.031e-08	B;CL;F4;hive	-	-	-2.02981	4.34779e-07	-1.7402	1.52735e-08	-1.98733	7.5113e-07	-	-	-	-	-	-	-2.63141	1.86412e-10	-	-	1.56338	3.32762e-09	no
400	231.028	22157	no	no	no	no	D-Ribitol 5-phosphate	C01068	yes	no	-	4	C01068; C02895; C03509; C19674	C5H13O8P	0.114046	0.579585	0.604021	0.0178367	0.409436	0.0147931	0.487589	0.0318591	CL	-	-	-	-	1.23732	0.0313178	-	-	-	-	-	-	-	-	-	-	-	-	2.41295	3.84457e-15	yes
401	231.078	5539.12	no	no	no	no	Nalidixic acid	C05079	no	no	-	3	C05079; C07434; C18878	C12H12N2O3	0.0262634	0.595421	0.0982868	0.103663	0.0708444	0.0803812	-0.201975	0.0304455	F4	-	-	-	-	-	-	-1.61927	0.012423	-	-	-	-	-	-	-	-	-	-	1.85239	7.9116e-11	no
402	231.099	11238.7	no	no	no	no	Boc-Asn	C01410	yes	no	-	4	C01410; C03415; C04390; C15767	C9H16N2O5	-0.14863	0.134314	0.0140864	0.908605	-0.0522912	0.53992	-0.522981	0.0107203	G;hive	-	-	-	-	-	-	-	-	-	-	-	-	2.20324	2.7098e-06	-1.29489	0.02023	-	-	2.94969	2.9625e-16	yes
403	232.029	17519.6	no	no	no	no	Sulbactam	C07770	yes	no	-	3	C07770; C13690; C13691	C8H11NO5S	0.316228	0.0419067	0.259896	0.380564	0.29857	0.182224	-0.535289	0.0354502		-	-	-	-	-	-	-	-	-	-	-	-	-	-	-	-	-	-	2.57102	1.43048e-12	yes
404	233.082	9084.26	no	no	no	no	1'-Acetoxychavicol acetate	C10426	no	no	Phenylacetic Acid Derivatives	2	C10426; C17917	C13H14O4	-0.109832	0.391996	0.0385142	0.675247	-0.0210605	0.763286	0.392389	0.033999	G;hive	-	-	-	-	-	-	-	-	-	-	-	-	1.86595	0.00033224	1.78493	0.000701025	-	-	2.00311	1.92586e-10	no
405	233.13	17363.2	yes	substrate	yes	yes	p-Coumaroylputrescine	C11200	no	typical pollen coat compound	-	2	C11200; C18326	C13H18N2O2	-1.77755	0.000653651	-2.58732	0.00169163	-2.29474	1.34191e-05	-2.55745	0.0016313	CL;F5;hive	-	-	-	-	-1.35662	0.000128782	-	-	-1.37171	0.00741722	-	-	-	-	-1.35095	0.00892813	-	-	1.62377	1.76176e-06	no
406	233.14	8108.76	no	no	no	yes	Benzoylagmatine	C02253	no	no	-	1	C02253	C12H18N4O	-0.223776	0.0253083	-0.303425	0.0527257	-0.275404	0.00472763	-0.858412	0.000901766	hive	-	-	-	-	-	-	-	-	-	-	-	-	-	-	-1.95709	6.06e-05	-	-	0.509107	4.43058e-06	no
407	233.155	29055.3	no	no	no	yes	Bakkenolide A	C09350	no	no	-	21	C09350; C09376; C09399; C09409; C09677; C09686; C09712; C09721; C09739; C09743; C16942; C16949; C17090; C17489; C17491; C17492; C17504; C17609; C19678; C20309; C20404	C15H22O2	-0.125127	0.0945689	-0.0440058	0.410649	-0.0752285	0.0565421	-0.218985	0.000452697	G;hive	-	-	-	-	-	-	-	-	-	-	-	-	1.29866	0.0321518	-1.67461	0.00143687	-	-	-0.660165	1.18983e-17	yes
408	233.166	4532.33	no	no	no	yes	Lidocaine	C07073	no	no	Anilides	2	C07073; C10751	C14H22N2O	-0.298946	0.0143	-0.327763	0.00153792	-0.313616	3.39001e-05	-0.527949	0.000735363	B;CL;F4;hive	-	-	-1.84175	0.000472186	-1.16407	0.00704267	-1.27643	0.0475664	-	-	-	-	-	-	-1.75536	0.00103074	-	-	-0.294253	3.83944e-06	no
409	233.994	5425.21	no	no	no	no	Pamidronate	C07395	no	no	Organic Phosphonic Acids and Derivatives	1	C07395	C3H11NO7P2	0.0985345	0.29697	0.122566	0.158628	0.109172	0.0817728	-0.0335197	0.769642	S	-	-	-	-	-	-	-	-	-	-	-	-	-	-	-	-	-1.42921	0.00237946	2.79445	1.04982e-11	no
410	234.114	4178.04	no	no	no	no	Lophophorine	C09573	no	no	Alkaloids	1	C09573	C13H17NO3	-0.171566	0.0190265	0.0139362	0.881847	-0.058498	0.34526	-0.0553938	0.669177	B;G	-	-	2.76156	8.45077e-11	-	-	-	-	-	-	-	-	1.56442	0.00021801	-	-	-	-	2.28186	1.28556e-07	no
411	235.028	52013.1	yes	substrate	no	yes	2-Imino-3-(7-chloroindol-3-yl)propanoate	C19688	no	no	-	1	C19688	C11H9ClN2O2	-1.89101	3.43004e-07	-1.26544	6.9929e-05	-1.44345	2.59157e-09	-2.10304	7.92267e-07	B;CL;F5;hive	-	-	0.944185	0.0485008	-1.45289	3.45682e-07	-	-	1.03032	0.0210793	-	-	-	-	-1.90865	3.51582e-07	-	-	2.78197	3.71682e-16	no
412	235.072	14531.3	no	no	no	yes	L-Formylkynurenine	C02700	no	no	Benzene and Substituted Derivatives	3	C02700; C15605; C19717	C11H12N2O4	0.0177209	0.8682	0.16596	0.0844289	0.111455	0.0896051	0.239135	0.00557963		-	-	-	-	-	-	-	-	-	-	-	-	-	-	-	-	-	-	1.97309	1.29403e-13	no
413	235.099	5656.23	no	no	no	yes	3-Dimethylallyl-4-hydroxymandelic acid	C12457	no	no	-	1	C12457	C13H16O4	-0.0335764	0.52346	0.142926	0.0393298	0.0816563	0.0872824	0.518337	0.00437224	F4;hive	-	-	-	-	-	-	-1.20776	0.00216419	-	-	-	-	-	-	2.59184	2.54969e-11	-	-	0.0326818	0.741601	no
414	235.109	8153.47	no	no	no	no	Carbetamide	C11075	no	no	-	2	C11075; C11723	C12H16N2O3	-0.239191	0.0582572	-0.147071	0.0471248	-0.195906	0.00965877	-0.0632312	0.747916	F4;F5	-	-	-	-	-	-	-2.56104	2.8164e-09	-1.6253	0.000208304	-	-	-	-	-	-	-	-	1.61124	3.16538e-11	no
415	235.134	15060.1	no	no	no	no	4-Heptyloxybenzoic acid	C14274	no	no	-	2	C14274; C14718	C14H20O3	0.129955	0.133291	0.44585	8.58315e-06	0.334356	2.5303e-06	-0.209303	0.0290111	B;CL	-	-	3.34684	1.53221e-11	1.15275	5.58498e-10	-	-	-	-	-	-	-	-	-	-	-	-	0.170715	0.00382201	no
416	235.145	8664.53	yes	product	yes	yes	Procaine	C07375	no	no	Benzoic Acid and Derivatives	3	C07375; C07894; C17723	C13H20N2O2; C13H20N2O2.	2.95766	0.0084644	2.94643	7.95626e-08	2.9431	2.02489e-09	1.2599	0.00854191	CL;F5;hive	-	-	-	-	2.63375	1.53221e-11	-	-	1.38362	1.53747e-11	-	-	-	-	0.547606	0.00158964	-	-	0.322947	2.72768e-05	no
417	235.17	11981.2	no	no	no	yes	Latia luciferin	C02293	no	no	-	10	C02293; C09627; C09678; C09681; C09700; C09733; C16502; C16946; C17493; C17604	C15H24O2	-0.379004	0.00638932	-0.218264	0.094536	-0.28016	0.00200199	-0.604886	0.000660932	A1;F4;hive;S	1.47422	0.000947415	-	-	-	-	-1.53376	0.000497317	-	-	-	-	-	-	-1.3202	0.00466148	0.898875	0.0387696	0.318299	0.00831928	no
418	236.078	55038.4	yes	substrate	no	yes	N-Acetyl-D-glucosaminate	C00835	yes	no	-	6	C00835; C01133; C03146; C03521; C03684; C06313	C8H15NO7; C9H11N5O3	-0.864203	0.000124046	-0.886513	4.57219e-07	-0.869404	1.41777e-11	-1.42563	4.59766e-08	CL;F5;hive	-	-	-	-	-1.59054	4.26654e-09	-	-	-1.86765	1.1778e-07	-	-	-	-	-2.17489	1.22855e-09	-	-	3.9999	2.79316e-12	yes
419	237.026	11569.2	yes	substrate	no	yes	Nitrofurantoin	C07268	yes	no	-	1	C07268	C8H6N4O5	-0.331462	8.40833e-05	-0.43688	9.0636e-05	-0.392783	2.96659e-06	-0.593574	6.71038e-06	CL;G;hive	-	-	-	-	-1.66961	6.05533e-06	-	-	-	-	-	-	-1.69194	0.000916852	-2.15548	9.12148e-06	-	-	3.42328	7.25566e-11	yes
420	237.063	36310.7	yes	substrate	no	yes	Xanthopterin-B2	C02333	yes	no	-	1	C02333	C9H10N4O4	-0.419465	0.0046224	-0.404395	0.000922849	-0.413912	1.19605e-06	-1.38538	5.1794e-08	A1;CL;G;hive	1.94656	1.9702e-08	-	-	-0.802539	0.00616523	-	-	-	-	-	-	-1.04337	0.00708071	-2.02636	5.85679e-09	-	-	5.31231	3.64449e-11	yes
421	237.088	14491.1	no	no	no	yes	Felbamate	C07501	yes	no	Not Available	1	C07501	C11H14N2O4	-0.221576	0.00106123	-0.120697	0.0677619	-0.162741	0.000628157	-0.476432	1.6218e-05	B;F5;hive	-	-	1.70226	5.20496e-06	-	-	-	-	-1.10107	0.00945023	-	-	-	-	-2.06486	3.39637e-08	-	-	2.00311	1.42509e-11	yes
422	237.111	9017.77	yes	product	no	no	3-[(3aS,4S,7aS)-7a-Methyl-1,5-dioxo-octahydro-1H-inden-4-yl]propanoate	C20199	no	no	-	1	C20199	C13H18O4	0.344771	5.90588e-05	0.543524	1.79427e-06	0.474946	2.05481e-09	0.384215	0.0127524	B;CL;hive	-	-	2.58314	1.58752e-11	1.94575	1.60988e-11	-	-	-	-	-	-	-	-	1.29773	0.000167907	-	-	0.447883	5.82038e-07	no
423	239.003	126663	no	no	no	yes	1,2-Dihydroxynaphthalene-6-sulfonate	C16196	yes	no	-	1	C16196	C10H8O5S	-0.100116	0.57206	-0.850864	0.00455004	-0.599209	0.00306801	-1.26381	0.00270774	B;CL;F5;hive	-	-	-1.8096	0.00334307	-1.23073	0.0134894	-	-	-1.44499	0.0422349	-	-	-	-	-1.61195	0.0140513	-	-	6.6117	3.12468e-11	yes
424	239.202	9310.84	no	no	no	yes	Cryptomeridiol	C17676	no	no	-	1	C17676	C15H28O2	0.941265	0.0371025	0.912217	2.9842e-05	0.91109	5.79004e-06	1.66267	0.00113604	B;CL;hive;S	-	-	1.4633	4.69245e-06	1.20467	6.79827e-07	-	-	-	-	-	-	-	-	2.95868	1.53412e-11	1.55267	4.95186e-09	0.399053	0.0058721	no
425	240.051	5829.55	no	no	no	no	N-(2,3-Dihydroxybenzoyl)-L-serine	C04204	yes	no	-	1	C04204	C10H11NO6	0.0506416	0.321071	0.186424	0.0066075	0.137412	0.00217822	-0.093993	0.398335	CL;G	-	-	-	-	1.24072	0.0131655	-	-	-	-	-	-	1.47546	0.0368393	-	-	-	-	2.78938	1.14351e-15	yes
426	240.124	24118.1	yes	substrate	no	yes	N-(3-Oxooctanoyl)homoserine lactone	C11841	no	no	-	1	C11841	C12H19NO4	-0.751389	0.00209876	-0.493175	0.00758932	-0.562566	9.23033e-05	-2.28187	1.85738e-08	F4;G;hive	-	-	-	-	-	-	-1.37395	0.0030531	-	-	-	-	-1.18249	0.0190167	-1.9582	4.47658e-06	-	-	2.094	3.83944e-06	no
427	241.013	56115.7	yes	substrate	no	yes	D-myo-Inositol 1,2-cyclic phosphate	C04299	yes	no	Cyclic Alcohols and Derivatives	2	C04299; C16848	C6H11O8P	-0.493143	0.000378634	-0.389951	4.77684e-06	-0.439344	2.09869e-08	-0.569617	0.000512174	CL;F4;Fp;hive	-	-	-	-	-1.31325	1.38587e-06	-1.45968	5.86012e-05	-	-	-1.68383	1.3714e-08	-	-	-1.80873	4.2196e-07	-	-	5.05686	6.22635e-08	yes
428	241.071	16146.2	no	no	no	no	Lumichrome	C01727	no	no	-	1	C01727	C12H10N4O2	-0.591961	2.75802e-05	-0.806857	0.0158669	-0.727543	0.000740254	-0.346348	0.18689	CL;F4;F5;Fp	-	-	-	-	-1.56768	0.000424818	-1.95546	0.00100161	-1.70817	0.00670852	-1.24052	0.027484	-	-	-	-	-	-	1.11092	3.0438e-14	no
429	241.083	38891.4	yes	substrate	yes	yes	Thymidine	C00214	no	no	Pyrimidine Nucleosides and Analogues	2	C00214; C19431	C10H14N2O5	-2.60491	5.01813e-06	-2.55354	1.29127e-05	-2.57133	2.13032e-10	-3.05429	7.78213e-06	B;CL;F4;F5;Fp;hive	-	-	0.997133	0.00186247	-1.7447	1.58998e-11	-1.78595	3.37782e-09	-1.69886	1.55734e-08	-0.743727	0.00716585	-	-	-1.84975	1.11003e-09	-	-	1.87696	4.23509e-09	yes
430	241.108	15791.4	yes	substrate	no	no	Diphenylcarbazide	C11232	no	no	-	1	C11232	C13H14N4O	-0.639648	5.90011e-05	-0.686453	3.70293e-05	-0.671627	2.56602e-09	-0.16685	0.188635	CL;F4;F5;Fp;S	-	-	-	-	-2.03877	2.37551e-11	-1.98218	1.37669e-07	-2.9506	1.56094e-11	-1.49574	1.37432e-06	-	-	-	-	-0.896454	0.0120324	0.777488	9.13611e-09	no
431	243.028	51001.7	no	no	no	no	L-Fuculose 1-phosphate	C01099	yes	no	-	4	C01099; C01131; C02985; C06369	C6H13O8P	-0.0189404	0.923893	0.863355	4.5247e-06	0.497655	0.000247833	0.481422	0.0147399	CL;F5;S	-	-	-	-	1.30868	0.000162014	-	-	2.54857	1.23107e-08	-	-	-	-	-	-	1.44097	0.000119331	3.94648	1.60677e-15	yes
432	243.062	61564.5	yes	substrate	no	yes	Uridine	C00299	yes	no	Pyrimidine Nucleosides and Analogues	3	C00299; C02067; C16745	C9H12N2O6	-0.883991	3.04629e-05	-1.13251	1.60625e-06	-1.04422	2.74098e-12	-1.21432	7.01213e-06	B;CL;F4;F5;Fp;G;hive	-	-	-2.10522	1.5527e-11	-1.83191	1.53463e-11	-1.91689	2.03538e-11	-1.57975	3.78962e-09	-1.05178	1.47562e-06	-1.62783	1.47122e-09	-1.91661	2.03811e-11	-	-	5.37615	3.34313e-11	yes
433	243.171	33119	no	no	no	no	N-(6-Aminohexanoyl)-6-aminohexanoate	C01255	no	no	-	2	C01255; C11332	C12H24N2O3	0.444204	0.179483	0.440442	0.00209987	0.399286	0.0720041	1.40043	0.0174623	G;hive	-	-	-	-	-	-	-	-	-	-	-	-	2.83138	1.53598e-11	2.23208	3.92713e-11	-	-	1.41199	2.60141e-15	yes
434	243.196	94282.5	yes	substrate	no	yes	2S-Hydroxytetradecanoic acid	C13790	no	no	-	1	C13790	C14H28O3	-1.17984	0.000504325	-0.934951	0.000355124	-1.02586	1.10812e-07	-1.44808	3.09482e-05	A1;B;CL;hive	1.23456	0.00735159	-1.68796	4.75546e-05	-1.25156	7.91148e-05	-	-	-	-	-	-	-	-	-1.66237	6.45399e-05	-	-	0.789815	0.00227591	yes
435	244.085	30836.7	no	no	no	no	Debromohymenialdisine	C19897	yes	no	-	1	C19897	C11H11N5O2	0.180517	0.0676868	0.326457	0.000814165	0.278691	6.9218e-05	-0.296678	0.0600724	CL;F4;hive	-	-	-	-	1.47783	5.06976e-06	-1.70059	8.57751e-05	-	-	-	-	-	-	-1.08176	0.0441301	-	-	2.59733	1.42821e-16	yes
436	244.155	14022.9	yes	substrate	no	yes	Isovalerylcarnitine	C20826	no	no	-	1	C20826	C12H23NO4	-0.681742	0.000124655	-0.9539	2.47011e-06	-0.856387	9.86158e-10	-0.68641	0.000370957	B;CL;F4;hive;S	-	-	-2.41583	1.53903e-09	-1.91084	4.39394e-10	-2.84479	2.06246e-11	-	-	-	-	-	-	-1.49545	0.000231299	-1.03443	0.00361477	1.91681	2.68169e-07	no
437	245.043	170991	yes	product	no	no	Glycerophosphoglycerol	C03274	yes	no	-	1	C03274	C6H15O8P	0.544077	0.00338985	0.455397	0.00141258	0.488651	1.34531e-06	0.739044	0.0157374	CL;F5;hive	-	-	-	-	1.06454	0.00380238	-	-	1.79676	6.02323e-05	-	-	-	-	1.91899	1.53226e-05	-	-	4.45116	7.81607e-11	yes
438	245.114	39795.4	no	no	no	yes	2,4-Bis(acetamido)-2,4,6-trideoxy-beta-L-altropyranose	C19972	yes	no	-	2	C19972; C20424	C10H18N2O5	-0.0938549	0.456634	-0.0765932	0.488605	-0.0940126	0.266242	-0.612913	0.000398536	F4;G;hive	-	-	-	-	-	-	-1.22091	0.00814661	-	-	-	-	2.38082	7.33747e-09	-1.38829	0.00141623	-	-	2.59376	1.69562e-15	yes
439	246.032	6444.77	no	no	no	yes	3-Chlorosalicylanilide	C11290	no	no	-	1	C11290	C13H10ClNO2	0.219636	0.209252	0.115178	0.402594	0.158165	0.124279	-0.415925	0.00374722		-	-	-	-	-	-	-	-	-	-	-	-	-	-	-	-	-	-	1.62817	1.38384e-11	no
440	246.064	13409.1	no	no	no	no	N-Succinyl-L-glutamate	C05931	no	no	-	1	C05931	C9H13NO7	0.431721	0.0185375	0.210988	0.0771971	0.293101	0.00245894	-0.0312318	0.875722		-	-	-	-	-	-	-	-	-	-	-	-	-	-	-	-	-	-	0.719552	0.000884197	no
441	246.075	9191.39	no	no	no	yes	N-(4-Coumaroyl)-L-homoserine lactone	C20677	no	no	-	1	C20677	C13H13NO4	0.0566623	0.691117	-0.141681	0.0331616	-0.071214	0.225494	-0.537595	8.77761e-05	F5;hive	-	-	-	-	-	-	-	-	-1.45746	0.00314255	-	-	-	-	-2.64746	6.80755e-09	-	-	2.00138	4.73367e-15	no
442	246.098	11649.2	no	no	no	yes	Linamarin	C01594	yes	no	Glycosyl Compounds	2	C01594; C19976	C10H17NO6	-0.30102	0.0183506	-0.205183	0.0842214	-0.238247	0.00267882	-0.860292	1.52114e-05	hive	-	-	-	-	-	-	-	-	-	-	-	-	-	-	-2.74998	9.03e-08	-	-	4.46943	3.72949e-11	yes
443	247.096	20201	no	no	no	yes	Prenyl caffeate	C10487	no	no	Cinnamic Acid Derivatives	4	C10487; C12456; C16788; C20426	C14H16O4	-0.300966	0.0852731	-0.283148	0.0268974	-0.293984	0.00153279	-0.798018	0.000310413	F4;G;hive	-	-	-	-	-	-	-1.23937	0.00559071	-	-	-	-	1.89412	2.50653e-06	-1.76709	1.24023e-05	-	-	2.39894	4.42959e-13	no
444	248.071	8762.56	yes	substrate	no	yes	Dubamine	C10661	yes	no	Alkaloids	1	C10661	C16H11NO2	-0.30412	0.00479438	-0.413233	6.87397e-06	-0.372816	9.61053e-09	-0.806394	0.000184188	CL;F5;hive	-	-	-	-	-1.46229	1.2933e-08	-	-	-1.89665	1.92808e-08	-	-	-	-	-2.51399	1.67321e-11	-	-	2.34704	1.11579e-13	yes
445	249.042	6515.18	no	no	no	no	2-Hydroxy-6-oxo-6-(2-hydroxyphenoxy)-hexa-2,4-dienoate	C07734	no	no	-	1	C07734	C12H10O6	0.277018	0.0283738	0.592758	7.51517e-07	0.487809	1.0071e-07	0.540473	0.319573	CL;F5;hive	-	-	-	-	1.66734	7.41903e-05	-	-	1.39918	0.0399597	-	-	-	-	1.49121	0.021498	-	-	1.83052	7.98051e-15	no
446	249.077	9454.68	no	no	no	yes	Citrinin	C16765	no	no	Pyrans	1	C16765	C13H14O5	-0.758709	3.28291e-05	-0.25208	0.0412722	-0.436409	1.94397e-05	-0.597985	0.000242119	F5;hive	-	-	-	-	-	-	-	-	-1.89497	0.00368249	-	-	-	-	-1.58212	0.0297381	-	-	0.843177	3.00192e-09	no
447	249.112	7878.84	yes	product	no	no	Diisopropyl phthalate	C14468	no	no	-	2	C14468; C14469	C14H18O4	0.510503	0.00111946	0.658741	2.0671e-06	0.609855	2.02489e-09	0.47719	0.0155235	B;CL;hive	-	-	2.25107	5.9405e-10	2.01194	1.72725e-11	-	-	-	-	-	-	-	-	1.36294	0.000202079	-	-	0.863744	6.9885e-10	no
448	249.125	12352.9	yes	substrate	no	yes	N-Caffeoylputrescine	C03002	no	no	Styrenes	2	C03002; C17725	C13H18N2O3	-1.62327	7.91033e-05	-1.53299	6.0086e-05	-1.58192	7.67783e-09	-1.81238	2.22329e-05	B;CL;F5;G;hive	-	-	1.30984	0.00515913	-1.25483	0.00013657	-	-	-1.37088	0.00279096	-	-	1.0746	0.0443584	-1.37148	0.0027737	-	-	1.8765	2.87557e-07	no
449	249.149	24029.5	no	no	no	no	Gemfibrozil	C07020	no	no	Toluenes	10	C07020; C09295; C09689; C09711; C09748; C13453; C13456; C14716; C20403; C20405	C15H22O3	0.035568	0.766351	0.126201	0.137548	0.0668037	0.501202	-0.25424	0.0192487	B;G;S	-	-	2.17458	5.71128e-09	-	-	-	-	-	-	-	-	2.56087	3.94192e-11	-	-	1.0757	0.000792461	0.444279	6.18091e-05	yes
450	249.186	8630.45	no	no	no	no	Methyl farnesoate	C16503	no	no	-	1	C16503	C16H26O2	0.308345	0.119881	-0.377951	0.0315289	-0.127531	0.337766	-0.278859	0.0605048	B;CL;F4;F5	-	-	1.16144	0.0181878	-0.869575	0.0215044	-2.01961	1.24552e-06	-1.77521	2.42131e-05	-	-	-	-	-	-	-	-	0.35931	0.00585919	no
451	249.223	2101.74	no	no	no	yes	(+)-12-(2-Cyclopenten-1-yl)-2-dodecanone	C15464	no	no	-	1	C15464	C17H30O	-1.27495	0.00017189	-0.577625	0.0404753	-0.911558	0.000219075	-1.12488	0.00153923	A1;F4	1.66159	0.000425871	-	-	-	-	-1.20291	0.0300671	-	-	-	-	-	-	-	-	-	-	-0.142906	0.194906	no
452	250.093	12125.3	yes	substrate	no	yes	Muramic acid	C06470	yes	no	Sugar Acids and Derivatives	1	C06470	C9H17NO7	-0.569449	0.00368931	-0.440056	0.000751715	-0.492906	1.4671e-07	-0.907626	9.40355e-06	CL;F5;G;hive	-	-	-	-	-1.03794	0.000598533	-	-	-1.21986	0.00324966	-	-	1.44697	0.000217166	-1.84354	1.21276e-06	-	-	5.22376	3.58157e-12	yes
453	250.109	5755.35	no	no	no	yes	Ac-Tyr-OEt	C01657	no	no	Amino Acids and Derivatives	1	C01657	C13H17NO4	-0.0608796	0.541778	0.142716	0.061327	0.0593941	0.323939	-0.544086	2.78936e-05	B;F4;G;hive	-	-	1.83604	2.60531e-06	-	-	-1.43435	0.000407939	-	-	-	-	1.02859	0.0321551	-1.51884	0.000146961	-	-	2.69119	4.80889e-13	no
454	250.128	4762.47	yes	substrate	no	yes	Prosulfocarb	C18760	no	no	-	1	C18760	C14H21NOS	-0.551939	4.8363e-05	-0.587607	0.000385686	-0.586716	2.66402e-07	-0.893436	2.78697e-05	B;CL;F5;G;hive	-	-	1.14689	0.0181404	-1.10894	0.000743397	-	-	-1.23387	0.00785941	-	-	1.4657	0.000680461	-1.53028	0.000329068	-	-	0.703421	1.61003e-07	no
455	251.079	41570.4	yes	substrate	no	yes	Nebularine	C01736	yes	no	Glycosyl Compounds	3	C01736; C05512; C15586	C10H12N4O4	-3.05432	5.7107e-05	-1.9407	0.000616102	-2.27097	3.59279e-08	-2.9674	0.000128976	CL;F4;Fp;G;hive	-	-	-	-	-1.42209	3.71356e-06	-1.56687	0.000151868	-	-	-1.48097	9.17806e-06	-1.57131	0.000144092	-1.67715	4.03574e-05	-	-	3.97219	3.5359e-10	yes
456	251.166	25544.1	no	no	no	yes	Cuauhtemone	C09645	no	no	-	6	C09645; C16504; C17502; C17605; C17607; C17612	C15H24O3	-0.462003	0.000189438	-0.390929	0.0119344	-0.418992	3.54667e-05	-0.782477	0.000330187	B;CL;F5;hive	-	-	1.22911	0.0138888	-1.05806	0.00295201	-	-	-1.70443	0.000104296	-	-	-	-	-1.86608	1.64882e-05	-	-	1.44405	1.38547e-09	no
457	251.238	874.27	no	no	no	no	Civetol	C17815	no	no	-	1	C17815	C17H32O	-0.98551	0.00390974	-0.2034	0.179925	-0.55148	0.00273482	-0.392954	0.0331112	A1;G;S	1.56887	0.00159139	-	-	-	-	-	-	-	-	-	-	1.53269	0.00224067	-	-	1.14333	0.00836049	0.171101	0.20936	no
458	252.073	7606.93	no	no	no	yes	Neopterin	C05926	yes	no	Pteridines and Derivatives	1	C05926	C9H11N5O4	-0.240143	0.00539478	-0.0656535	0.573475	-0.117436	0.137826	-0.684961	0.000265268	hive	-	-	-	-	-	-	-	-	-	-	-	-	-	-	-2.17339	2.9e-05	-	-	4.28107	2.30069e-11	yes
459	252.099	12700.5	no	no	no	no	Pyricarbate	C12842	yes	no	-	1	C12842	C11H15N3O4	0.230928	0.447953	-0.451052	0.0922242	-0.195161	0.310561	1.48878	0.0470024	hive	-	-	-	-	-	-	-	-	-	-	-	-	-	-	2.69078	8.23e-09	-	-	4.39433	4.21942e-07	yes
460	252.104	7977.4	no	no	no	no	Cinnamyl anthranilate	C19374	yes	no	-	1	C19374	C16H15NO2	0.0519055	0.666237	-0.0835957	0.318602	-0.0440734	0.612513	1.17415	0.0314902	G;hive	-	-	-	-	-	-	-	-	-	-	-	-	0.981795	0.0438828	3.03374	1.55836e-11	-	-	4.3197	3.4623e-13	yes
461	253.072	8713.46	no	no	no	no	L-Arginine phosphate	C05945	yes	no	Amino Acids and Derivatives	1	C05945	C6H15N4O5P	-0.0290349	0.744811	0.0995641	0.221116	0.0547811	0.333177	-0.18637	0.0168466	G	-	-	-	-	-	-	-	-	-	-	-	-	1.55568	0.0152359	-	-	-	-	2.63053	1.1446e-11	yes
462	253.084	8900.32	yes	substrate	no	yes	2-Hydroxyfelbamate	C16582	yes	no	Benzene and Substituted Derivatives	2	C16582; C16584	C11H14N2O5	-0.326382	0.0017024	-0.289246	0.00253068	-0.301844	5.14028e-06	-0.995227	2.93768e-06	CL;F4;F5;Fp;hive	-	-	-	-	-1.05779	0.000234548	-1.79831	9.27334e-07	-1.25784	0.00124086	-1.32778	1.24178e-05	-	-	-2.90163	1.55521e-11	-	-	4.06109	1.77937e-10	yes
463	253.093	20927.9	yes	substrate	no	yes	3-beta-D-Galactosyl-sn-glycerol	C05401	yes	no	Disaccharides	2	C05401; C11546	C9H18O8	-0.598725	0.000598336	-0.887553	0.00015029	-0.783977	3.7918e-06	-1.74953	5.5419e-06	B;CL;F4;F5;Fp;G;hive	-	-	-1.95967	6.27598e-06	-1.8125	4.01915e-08	-1.62275	0.00028451	-1.75175	6.83013e-05	-1.73601	1.10665e-06	-1.64431	0.000224925	-2.7716	3.73261e-10	-	-	5.72264	1.60736e-09	yes
464	253.12	32251.1	no	no	no	yes	Midodrine	C07890	yes	no	Amino Acids and Derivatives	1	C07890	C12H18N2O4	-0.010981	0.960295	0.226905	0.10394	0.12567	0.261055	-1.39425	2.6667e-06	B;hive	-	-	1.256	0.0418194	-	-	-	-	-	-	-	-	-	-	-2.04105	3.93329e-05	-	-	3.81672	6.81612e-14	yes
465	253.181	23325.8	yes	product	no	yes	Kikkanol A	C17603	no	no	-	5	C17603; C17606; C17608; C17610; C18538	C15H26O3	0.856962	0.00203332	0.84295	4.60323e-05	0.848273	3.3233e-08	0.746677	0.00617238	CL;F5;hive	-	-	-	-	1.6985	1.27699e-09	-	-	2.43935	7.89545e-11	-	-	-	-	1.45071	8.39655e-05	-	-	0.96105	1.92135e-07	no
466	254.033	4258.44	no	no	no	no	5-(3'-Carboxy-3'-oxopropyl)-4,6-dihydroxypicolinate	C05656	no	no	-	1	C05656	C10H9NO7	0.0790553	0.367884	0.0509218	0.460964	0.0620918	0.206287	0.140661	0.137968		-	-	-	-	-	-	-	-	-	-	-	-	-	-	-	-	-	-	2.38453	4.51773e-14	no
467	254.104	8792.67	yes	product	no	no	N-D-Glucosylarylamine	C03142	yes	no	-	1	C03142	C12H17NO5	0.777289	0.00427796	0.966904	5.18523e-07	0.90181	8.21924e-10	-0.37876	0.0396813	B;CL;F5	-	-	1.09708	0.00017911	2.09759	1.53305e-11	-	-	2.20161	1.58021e-11	-	-	-	-	-	-	-	-	3.93591	3.96193e-10	yes
468	254.116	7245.35	no	no	no	no	HC Blue No.1	C19247	no	no	-	1	C19247	C11H17N3O4	0.296613	0.237568	0.424133	0.0128058	0.36568	0.00471826	0.291287	0.494558		-	-	-	-	-	-	-	-	-	-	-	-	-	-	-	-	-	-	2.78985	5.91363e-13	no
469	255.031	18826.3	yes	substrate	no	yes	Anthragallol	C10297	yes	no	-	2	C10297; C10395	C14H8O5	-1.82027	1.22079e-06	-1.28763	3.21202e-07	-1.48978	3.66183e-12	-0.805691	1.31813e-05	CL;F5;G;hive	-	-	-	-	-1.81344	1.79595e-11	-	-	-1.25944	0.000149183	-	-	0.817387	0.0478233	-1.3144	6.58073e-05	-	-	4.60281	9.14705e-14	yes
470	255.067	17200.3	no	no	no	yes	3,9-Dihydroxypterocarpan	C04271	no	no	Flavonoids	9	C04271; C08650; C09762; C09827; C10262; C15609; C16404; C16760; C18256	C15H12O4	-0.186983	0.0046014	0.036994	0.576006	-0.0398166	0.405863	0.995269	0.00359562	hive	-	-	-	-	-	-	-	-	-	-	-	-	-	-	3.55453	1.53e-11	-	-	2.93872	3.27273e-12	no
471	255.087	21897.5	no	no	no	yes	Phenylgalactoside	C02578	yes	no	-	3	C02578; C03097; C11611	C12H16O6	-0.0740871	0.58294	-0.113835	0.185037	-0.0964953	0.151178	-0.591311	3.05082e-05	F4;hive;S	-	-	-	-	-	-	-1.27263	0.00765917	-	-	-	-	-	-	-1.50396	0.00071512	1.48722	2.39216e-05	2.62159	4.23142e-14	yes
472	255.092	29585.4	yes	substrate	no	yes	Buthidazole	C19112	yes	no	-	1	C19112	C10H16N4O2S	-0.460872	0.000204379	-0.288999	0.000571867	-0.350983	1.6563e-08	-1.44304	6.21255e-09	B;CL;F5;Fp;G;hive	-	-	1.0821	0.0020809	-0.853535	0.00121128	-	-	-1.16392	0.0006774	-0.977482	0.000494797	-1.30668	8.62564e-05	-2.97257	1.53445e-11	-	-	3.44855	1.85758e-10	yes
473	257.078	26423	yes	substrate	no	yes	(1-Ribosylimidazole)-4-acetate	C05131	no	no	Imidazole Nucleosides and Nucleotides	2	C05131; C16744	C10H14N2O6	-0.673953	6.17853e-07	-0.62377	6.40358e-08	-0.643689	1.49468e-14	-0.959705	2.57375e-08	CL;F4;Fp;hive	-	-	-	-	-1.63534	1.53307e-11	-1.35208	1.98562e-09	-	-	1.05369	1.11726e-08	-	-	-2.26339	1.53245e-11	-	-	0.84691	2.92733e-09	yes
474	257.176	73051.4	no	no	no	yes	Dibutyl adipate	C14253	no	no	-	2	C14253; C14260	C14H26O4	-0.00876833	0.967377	0.0800259	0.570781	0.0740712	0.576348	-1.08371	1.05986e-05	B;hive	-	-	-1.84899	0.000222211	-	-	-	-	-	-	-	-	-	-	-2.23968	4.24211e-06	-	-	0.69998	0.000100049	no
475	258.039	23043	no	no	no	no	D-Glucosamine 6-phosphate	C00352	no	no	Monosaccharides	7	C00352; C01283; C03783; C06156; C06377; C12213; C12214	C6H14NO8P	0.3871	0.00471122	0.047502	0.679357	0.1688	0.0484852	0.375031	0.174062	F4;hive	-	-	-	-	-	-	1.67966	0.00615317	-	-	-	-	-	-	1.43663	0.0343444	-	-	0.618455	8.28562e-07	yes
476	259.023	543594	yes	substrate	no	yes	D-Fructose 6-phosphate	C00085	yes	no	Monosaccharides	35	C00085; C00092; C00103; C00275; C00446; C00636; C00663; C00668; C01002; C01094; C01097; C01113; C01171; C01172; C01177; C02888; C02962; C02965; C03251; C03267; C03384; C03546; C03606; C03654; C03735; C03811; C04006; C05001; C05345; C06019; C06155; C06312; C15924; C15926; C18096	C6H13O9P	-0.987862	0.000736333	-1.24301	9.11579e-06	-1.1519	2.94708e-09	-1.43417	4.961e-06	CL;F5;G;hive	-	-	-	-	-1.61833	4.19806e-07	-	-	-1.6172	0.000182766	-	-	-1.47613	0.000869179	-1.76526	3.31748e-05	-	-	4.76134	5.17856e-12	yes
477	260.078	14002.5	no	no	no	no	Hymexazol O-glucoside	C11102	yes	no	-	2	C11102; C11104	C10H15NO7	0.180764	0.344682	0.396759	0.00315878	0.313934	0.00149349	-0.272475	0.115446	A1;CL	2.75939	1.62538e-09	-	-	1.08871	0.00379607	-	-	-	-	-	-	-	-	-	-	-	-	3.03043	3.69678e-13	yes
478	260.114	52155	no	no	no	no	Heterodendrin	C08332	no	no	-	3	C08332; C08334; C10607	C11H19NO6	0.0544447	0.923893	-0.173089	0.647753	-0.0935122	0.734609	0.0718405	0.900424		-	-	-	-	-	-	-	-	-	-	-	-	-	-	-	-	-	-	-2.98432	8.36554e-08	yes
479	261.11	9836.91	no	no	no	yes	Ornaline	C01683	no	no	Amino Acids and Derivatives	1	C01683	C10H18N2O6	-0.104233	0.0853563	0.0295452	0.71434	-0.0243063	0.656406	-0.27442	0.00635729	F4;F5;G;hive	-	-	-	-	-	-	-1.54921	0.000491902	-1.18872	0.0181364	-	-	1.79297	3.17862e-05	-1.07076	0.0497552	-	-	1.50487	7.02096e-14	no
480	261.148	13310.8	no	no	no	yes	3''-Hydroxy-geranylhydroquinone	C18132	no	no	-	1	C18132	C16H22O3	-0.202989	0.0785304	-0.0104847	0.912419	-0.101018	0.233928	-0.733449	8.8461e-06	B;F4;G;hive	-	-	1.08209	0.0380654	-	-	-1.08906	0.0358631	-	-	-	-	1.66939	9.00593e-05	-2.03672	1.10197e-06	-	-	0.895085	5.00309e-08	no
481	262.093	26838.7	no	no	no	yes	4-O-(beta-L-Arabinofuranosyl)-(2S,4S)-4-hydroxyproline	C20706	yes	no	-	1	C20706	C10H17NO7	0.00957357	0.974807	-0.197273	0.18131	-0.119491	0.391042	-0.695605	0.00266737	F4;G;hive;S	-	-	-	-	-	-	1.7638	0.00021174	-	-	-	-	-1.54915	0.0017759	-1.44647	0.00462403	-0.994117	0.035341	4.13153	1.38318e-11	yes
482	263.103	9435.74	no	no	no	yes	Phenylacetylglutamine	C04148	no	no	Amino Acids and Derivatives	2	C04148; C05642	C13H16N2O4	-0.0337265	0.706027	-0.0277385	0.763065	-0.0301264	0.631354	-0.628702	3.1738e-05	F4;F5;hive	-	-	-	-	-	-	-1.6933	0.000169663	-1.38334	0.00414113	-	-	-	-	-2.07742	2.19944e-06	-	-	2.11012	2.67398e-08	no
483	263.128	9203.19	no	no	no	yes	Abscisate	C06082	no	no	Prenol Lipids	25	C06082; C09291; C09304; C09349; C09355; C09381; C09453; C09456; C09470; C09481; C09498; C09506; C09530; C09531; C09540; C09542; C09574; C09600; C09683; C09688; C09708; C10766; C11060; C20399; C20402	C15H20O4	0.079764	0.211749	0.197809	0.00578181	0.154551	0.00109736	-0.346146	0.00175409	B;CL;G;hive	-	-	2.22622	1.0108e-08	0.775776	0.0311401	-	-	-	-	-	-	1.77479	4.38527e-06	-1.1261	0.0108677	-	-	1.29516	4.90838e-11	no
484	263.14	10740.8	no	no	no	no	Feruloylputrescine	C10497	no	no	Phenols and Derivatives	1	C10497	C14H20N2O3	0.372239	0.0205574	0.0638471	0.625269	0.174247	0.0854673	0.00727778	0.976352	B;G	-	-	2.81234	1.71171e-11	-	-	-	-	-	-	-	-	1.8709	7.42082e-07	-	-	-	-	1.81188	1.7072e-09	no
485	263.165	25419.7	no	no	no	yes	Dehydrojuvabione	C09657	no	no	-	2	C09657; C17747	C16H24O3	0.129314	0.342582	0.150998	0.12927	0.130728	0.118185	-0.900241	1.0161e-06	B;G;hive	-	-	1.87611	6.28831e-07	-	-	-	-	-	-	-	-	1.41497	0.000278596	-2.10358	2.70344e-08	-	-	0.147223	0.00147711	no
486	263.202	6435.15	yes	product	no	yes	Heptadecatrienoic acid	C16344	no	no	-	1	C16344	C17H28O2	1.1012	0.00150467	0.949166	8.83892e-05	0.995741	4.36652e-07	1.84278	0.0029968	B;CL;hive	-	-	2.22162	1.5432e-11	1.10962	8.85317e-08	-	-	-	-	-	-	-	-	3.08414	1.53225e-11	-	-	0.606736	6.57721e-12	no
487	264.062	20965.4	no	no	no	yes	Isoniazid alpha-ketoglutaric acid	C16625	no	no	Carboxylic Acids and Derivatives	1	C16625	C11H11N3O5	-0.0271712	0.800483	0.00810191	0.898974	-0.00238225	0.962484	-0.39765	8.68917e-05	hive	-	-	-	-	-	-	-	-	-	-	-	-	-	-	-2.25039	3.75e-06	-	-	1.80468	9.24197e-15	yes
488	264.073	10499.7	no	no	no	no	5'-Dehydroadenosine	C11500	no	no	-	1	C11500	C10H11N5O4	-0.187481	0.1051	0.0154938	0.898017	-0.0522202	0.52242	-0.239592	0.245413		-	-	-	-	-	-	-	-	-	-	-	-	-	-	-	-	-	-	1.76056	1.75683e-08	yes
489	264.143	3546.29	no	no	no	no	Esprocarb	C14526	no	no	-	1	C14526	C15H23NOS	0.01634	0.900949	-0.0169105	0.862954	-0.0133704	0.858356	-0.215038	0.104882	B;G	-	-	2.50657	3.75932e-11	-	-	-	-	-	-	-	-	2.08761	9.65663e-09	-	-	-	-	2.00681	1.14124e-12	no
490	265.047	16960.6	no	no	no	no	Methoxybrassinin	C08506	no	no	Indoles	1	C08506	C12H14N2OS2	0.32875	0.0153193	0.513839	5.07325e-05	0.456826	1.95308e-06	-0.306318	0.0181613	CL;Fp	-	-	-	-	1.70137	1.0618e-09	-	-	-	-	0.965599	0.00274718	-	-	-	-	-	-	1.11885	1.71315e-10	yes
491	265.057	30141.9	yes	product	no	no	5'-Oxoinosine	C01993	no	no	-	1	C01993	C10H10N4O5	0.557482	0.00326511	0.887079	3.71996e-07	0.779333	4.60402e-09	-0.156973	0.158313	CL;F5;Fp;G	-	-	-	-	2.09666	1.53245e-11	-	-	2.02929	1.67067e-11	1.37171	1.4352e-09	0.889358	0.00238181	-	-	-	-	1.14982	2.09133e-15	yes
492	265.181	20422.6	no	no	no	no	Juvenile hormone II acid	C04834	no	no	-	3	C04834; C09693; C09694	C16H26O3	0.186176	0.0283738	0.310654	0.00358684	0.257121	0.000403535	0.0149557	0.895566	B;CL;S	-	-	2.05844	2.60981e-05	1.27377	0.00111949	-	-	-	-	-	-	-	-	-	-	1.0109	0.0466424	-0.343931	2.92546e-05	no
493	265.217	25014.1	no	no	no	yes	Hydroprene	C18862	no	no	-	1	C18862	C17H30O2	1.83981	0.013368	2.28127	0.00456568	2.05397	7.76814e-05	3.31813	0.00178581	B;CL;hive	-	-	1.87744	4.49848e-07	1.28844	5.65324e-06	-	-	-	-	-	-	-	-	2.99454	1.5468e-11	-	-	-0.520121	5.22388e-09	no
494	266.05	6565.74	no	no	no	yes	Oxycarboxin	C10956	no	no	-	1	C10956	C12H13NO4S	-0.325978	0.00796946	-0.0098061	0.885643	-0.118557	0.0387943	-0.658472	1.59336e-07	F4;hive	-	-	-	-	-	-	-1.52193	0.00034718	-	-	-	-	-	-	-2.77866	6.871e-11	-	-	1.42627	6.82034e-12	no
495	266.089	54551.9	yes	substrate	yes	yes	Adenosine	C00212	yes	no	Purine Nucleosides and Analogues	4	C00212; C00330; C07195; C07210	C10H13N5O4; C10H13N5O4.	-1.93175	7.68702e-07	-1.86822	1.62295e-06	-1.89314	3.66183e-12	-2.56325	4.91804e-07	CL;F4;F5;Fp;G;hive	-	-	-	-	-1.97321	1.53239e-11	-1.40886	1.30644e-08	-1.91928	1.56785e-11	-1.1779	8.42524e-09	-1.17278	1.91476e-06	-2.25779	1.53425e-11	-	-	5.01331	5.22714e-13	yes
496	267.074	160770	yes	substrate	yes	yes	Inosine	C00294	yes	no	Purine Nucleosides and Analogues	1	C00294	C10H12N4O5	-2.32093	0.000219037	-1.74421	6.99872e-06	-1.97306	3.32725e-09	-1.49952	8.54853e-06	B;CL;F4;F5;Fp;hive;S	-	-	-1.67976	3.2969e-06	-1.59584	7.99234e-09	-1.60935	8.85944e-06	-1.10357	0.00614564	-0.968089	0.00266159	-	-	-1.47032	5.99276e-05	0.981623	0.00218351	3.40961	1.10318e-19	yes
497	267.124	34505.6	no	no	no	yes	Ripazepam	C19518	no	no	-	1	C19518	C15H16N4O	-0.275413	0.230966	0.325339	0.00194087	0.134317	0.205954	-1.1951	1.21846e-07	CL;F4;F5;hive	-	-	-	-	0.833546	0.00179613	-1.53279	2.89771e-06	1.90955	7.29917e-09	-	-	-	-	-1.85599	1.72144e-08	-	-	3.0364	4.9923e-13	no
498	267.146	10055.6	no	no	no	no	Histidylleucine	C05010	no	no	-	1	C05010	C12H20N4O3	0.190129	0.21482	-0.0861988	0.289812	0.0112781	0.900204	0.27474	0.110995	F4;F5;Fp;G	-	-	-	-	-	-	-1.34835	0.000132991	-1.21981	0.000761468	0.777313	0.0220758	2.44827	2.49659e-11	-	-	-	-	1.83736	2.67766e-10	no
499	267.233	21244.1	yes	substrate	no	yes	omega-Cyclohexylundecanoic acid	C12100	no	no	Fatty Acids and Conjugates	2	C12100; C16536	C17H32O2	-1.86928	6.71704e-05	-1.04593	0.00298815	-1.41507	4.59192e-06	-1.05522	0.00266737	A1;B;CL;F4	1.60592	0.000355485	-1.16306	0.0270158	-0.928657	0.016337	-1.23627	0.0142162	-	-	-	-	-	-	-	-	-	-	0.469699	0.00309951	no
500	267.269	2609.6	yes	substrate	no	yes	Octadecanal	C01838	no	no	Fatty Aldehydes	1	C01838	C18H36O	-1.23726	0.000421726	-1.14139	1.55369e-05	-1.16073	6.1377e-09	-1.13858	2.03594e-05	B;CL;F4;F5;hive;S	-	-	-1.20185	0.000125915	-1.34784	9.48901e-09	-1.40669	4.59915e-06	-1.49279	1.09322e-06	-	-	-	-	-1.34567	1.25579e-05	1.17409	3.40414e-06	-0.415463	8.26444e-07	no
501	268.023	13276.7	no	no	no	no	N-Acetyl-L-glutamate 5-phosphate	C04133	yes	no	Amino Acids and Derivatives	2	C04133; C19007	C7H12NO8P; C8H16NO3PS2	0.857778	0.00352688	0.448907	0.0943981	0.591669	0.0020918	-0.118802	0.705081	A1;B;F4;Fp	1.46628	0.00285978	1.41725	0.00453848	-	-	1.85311	5.46035e-05	-	-	1.23229	0.00216146	-	-	-	-	-	-	2.48708	0.00040191	yes
502	269.018	7209.94	yes	product	no	yes	Sulfamethizole	C08050	no	no	Benzenesulfonamides	1	C08050	C9H10N4O2S2	0.290875	0.000292633	0.279841	0.000542493	0.291274	5.65892e-06	0.311466	0.000233455	CL;Fp	-	-	-	-	0.983576	0.0105911	-	-	-	-	1.88012	2.43191e-07	-	-	-	-	-	-	-0.803234	0.0014638	no
503	269.046	10368.5	yes	substrate	no	yes	Apigenin	C01477	yes	no	Flavonoids	18	C01477; C02495; C06563; C08730; C10023; C10037; C10044; C10113; C10294; C10343; C10369; C10376; C10379; C10397; C14313; C14314; C15222; C16796	C15H10O5	-0.867879	0.000204379	-0.549295	0.00127288	-0.666406	3.74937e-07	-0.718805	0.00202902	Fp	-	-	-	-	-	-	-	-	-	-	1.63355	0.000192184	-	-	-	-	-	-	2.23403	1.49879e-13	yes
504	269.066	8436.82	no	no	no	no	D-Lombricine	C01726	yes	no	-	2	C01726; C14177	C6H15N4O6P	-0.209194	0.0142937	-0.135958	0.372985	-0.157588	0.0899779	-0.328643	0.0457021		-	-	-	-	-	-	-	-	-	-	-	-	-	-	-	-	-	-	2.2324	2.96928e-12	yes
505	269.114	9138.14	no	no	no	no	Hypoglycin B	C08280	no	no	Amino Acids and Derivatives	1	C08280	C12H18N2O5	0.190928	0.0257227	0.279209	0.000225119	0.236479	6.13955e-05	0.465208	0.0765607	CL;hive	-	-	-	-	1.22586	0.00303705	-	-	-	-	-	-	-	-	2.18451	1.37631e-05	-	-	1.63218	6.8021e-10	no
506	269.156	7687.76	yes	product	no	no	Estrone	C00468	no	no	Steroids and Steroid Derivatives	6	C00468; C13101; C14261; C14485; C14590; C15215	C18H22O2	0.493555	0.00374847	0.353885	0.00157921	0.401224	5.54545e-06	0.47944	0.026333	CL;hive	-	-	-	-	1.40079	0.000236053	-	-	-	-	-	-	-	-	1.98633	5.62546e-05	-	-	0.667856	1.06677e-06	no
507	269.176	41815.3	yes	product	yes	yes	(10S)-Juvenile hormone III acid diol	C16506	no	no	-	1	C16506	C15H26O4	1.79736	0.000170361	1.68443	4.75259e-06	1.72236	4.92246e-10	2.40784	0.00352381	CL;F5;hive	-	-	-	-	1.65894	1.55881e-11	-	-	0.720568	0.0364686	-	-	-	-	3.22687	1.53221e-11	-	-	1.10125	1.4802e-06	no
508	269.212	36737.2	yes	substrate	no	yes	16-Oxo-palmitate	C19614	no	no	-	1	C19614	C16H30O3	-0.737094	0.00763282	-0.591571	0.000364559	-0.651364	2.57139e-06	-0.882641	3.1738e-05	A1;CL;F4;hive	1.44463	0.00455947	-	-	-1.1205	0.00351528	-1.22206	0.0305732	-	-	-	-	-	-	-1.52437	0.00217171	-	-	0.550459	0.000987065	yes
509	271.061	42070	no	no	no	yes	Naringenin	C00509	yes	no	Flavonoids	15	C00509; C01263; C01592; C03567; C06561; C08578; C09047; C09614; C09751; C09826; C12087; C14458; C15567; C16232; C17673	C15H12O5	-1.54656	0.020875	-0.462511	0.116948	-0.85716	0.00292606	1.47135	0.00491011	hive	-	-	-	-	-	-	-	-	-	-	-	-	-	-	2.96915	1.73e-11	-	-	4.71965	5.39199e-06	yes
510	271.228	96626.5	yes	substrate	no	yes	16-Hydroxypalmitate	C18218	no	no	-	1	C18218	C16H32O3	-3.019	0.00833826	-1.87865	0.00167611	-2.38979	7.39977e-05	-1.9624	0.00140707	A1;CL;hive	1.34252	0.00831909	-	-	-1.11896	0.00250397	-	-	-	-	-	-	-	-	-1.14253	0.044932	-	-	1.3027	0.00259331	yes
511	272.16	22640.1	no	no	no	no	(2R,3R)-3-Methylglutamyl-5-semialdehyde-N6-lysine	C20279	no	no	-	1	C20279	C12H23N3O4	0.300976	0.0199623	0.108403	0.389317	0.174275	0.0578354	0.56798	0.0140118	F4;hive	-	-	-	-	-	-	-1.59216	0.00383042	-	-	-	-	-	-	1.77793	0.000748497	-	-	4.63576	1.87795e-08	no
512	273.038	63022.1	no	no	no	yes	1-Deoxy-D-altro-heptulose 7-phosphate	C04359	yes	no	-	1	C04359	C7H15O9P	-1.33985	0.000124046	-0.541782	0.0505389	-0.926684	0.000245938	-0.704629	0.00930136	B;F5	-	-	1.67075	0.000696683	-	-	-	-	1.68919	0.000581878	-	-	-	-	-	-	-	-	3.11149	5.49795e-13	yes
513	273.077	11605.4	no	no	no	yes	Phloretin	C00774	yes	no	Acetophenones	12	C00774; C08929; C08948; C09029; C09320; C09735; C09952; C12122; C12124; C12128; C13767; C16415	C15H14O5	0.264126	0.0122913	0.447073	0.000120114	0.367844	6.44683e-06	2.08839	0.000170224	CL;Fp;hive	-	-	-	-	0.446628	0.000140218	-	-	-	-	0.337116	0.0236712	-	-	3.99912	1.53221e-11	-	-	2.98029	3.98481e-12	yes
514	273.091	12384.9	yes	substrate	no	yes	2,3-Dihydrothienamycin	C20820	no	no	-	1	C20820	C11H18N2O4S	-1.15414	3.24689e-05	-1.12704	9.63148e-08	-1.13809	2.60326e-13	-0.879917	2.64028e-07	B;CL;F4;F5;hive	-	-	-0.675356	0.0120702	-1.7732	1.53265e-11	-2.15661	1.53429e-11	-1.7892	1.59367e-11	-	-	-	-	-1.49341	3.9286e-10	-	-	3.05338	7.74054e-11	no
515	274.093	17081.4	yes	product	no	no	1,6-Anhydro-N-acetyl-beta-muramate	C08328	yes	part of the bacterial PGN	-	2	C08328; C19769	C11H17NO7	1.0971	0.00266599	1.38546	1.85655e-06	1.28926	2.84423e-09	-0.10521	0.670327	CL;G;S	-	-	-	-	2.56204	1.53221e-11	-	-	-	-	-	-	0.736177	0.0237712	-	-	0.566696	0.0453976	4.04421	9.93508e-12	yes
516	274.105	74453.8	no	no	no	yes	(5-L-Glutamyl)-L-glutamine	C05283	yes	no	Amino Acids and Derivatives	2	C05283; C18048	C10H17N3O6	-0.302267	0.069859	-0.156986	0.377718	-0.214297	0.0660299	-1.09869	0.000145189	F4;hive	-	-	-	-	-	-	-1.67065	0.00988066	-	-	-	-	-	-	-1.89126	0.00192286	-	-	2.30644	3.09885e-13	yes
517	275.07	24170.2	yes	substrate	no	yes	Biotin sulfone	C20387	yes	no	-	1	C20387	C10H16N2O5S	-0.824118	2.19874e-05	-0.685252	1.11762e-05	-0.747284	1.16122e-09	-1.27762	2.59025e-07	CL;F5;Fp;hive;S	-	-	-	-	-1.6381	5.7711e-09	-	-	-1.46277	8.98385e-05	-1.47654	9.92235e-07	-	-	-2.5454	3.66349e-11	-0.809101	0.0272219	3.64986	7.17143e-11	yes
518	275.088	20049.5	yes	substrate	no	yes	Glutamyl-glutamic acid	C01425	yes	no	-	2	C01425; C05282	C10H16N2O7	-0.923909	1.52281e-05	-0.41625	0.000416169	-0.61274	8.10121e-08	-0.57577	3.67572e-05	CL;F5;hive	-	-	-	-	-1.32076	0.00178092	-	-	-1.56612	0.00720098	-	-	-	-	-1.73413	0.00181229	-	-	4.13262	2.85388e-09	yes
519	275.125	22612.5	no	no	no	no	N6-(L-1,3-Dicarboxypropyl)-L-lysine	C00449	yes	no	Amino Acids and Derivatives	1	C00449	C11H20N2O6	-0.147667	0.10497	0.0673593	0.351941	-0.00230208	0.967212	0.0627029	0.495996		-	-	-	-	-	-	-	-	-	-	-	-	-	-	-	-	-	-	3.71395	1.6269e-05	yes
520	275.165	23930.5	yes	substrate	no	yes	Buddledin A	C09623	no	no	-	4	C09623; C10494; C17506; C20000	C17H24O3	-0.616875	0.00197464	-0.624987	7.56542e-07	-0.62235	2.69523e-11	-1.28957	1.85738e-08	B;CL;F4;hive	-	-	-1.41129	0.00320013	-1.61378	1.34896e-06	-1.12046	0.043226	-	-	-	-	-	-	-2.71245	1.20648e-09	-	-	0.173127	0.00297076	no
521	275.202	30642.4	yes	substrate	no	yes	Stearidonic acid	C16300	yes	no	Lineolic Acids and Derivatives	2	C16300; C19042	C18H28O2	-2.50912	0.000169812	-1.59369	0.000281776	-1.93545	8.18898e-08	-2.72396	4.22497e-05	B;CL;F4;hive	-	-	-1.07503	0.0278432	-1.39028	5.7867e-06	-1.38802	0.00112285	-	-	-	-	-	-	-1.76445	1.27577e-05	-	-	4.40882	3.10542e-05	yes
522	276.073	10991.6	yes	substrate	no	yes	trans-2-[(Dimethylamino)methylimino]-5-[2-(5-nitro-2- furyl)-vinyl]-1,3,4-o...	C19232	yes	no	-	1	C19232	C11H11N5O4	-0.42542	0.0015151	-0.474708	0.00386357	-0.458253	8.6254e-06	-0.733291	0.00150374	A1;CL;hive	2.44113	6.14537e-10	-	-	-0.90531	0.00575073	-	-	-	-	-	-	-	-	-1.28657	0.0019803	-	-	4.06813	2.56931e-12	yes
523	276.109	92849.3	yes	substrate	yes	yes	S-(2-Methylpropanoyl)-dihydrolipoamide	C04424	yes	no	Thiolanes	1	C04424	C12H23NO2S2	-1.84532	3.43004e-07	-1.99297	4.28913e-07	-1.941	2.18693e-13	-3.64429	2.84501e-07	CL;F5;hive	-	-	-	-	-1.90701	1.96562e-11	-	-	-1.78628	2.31015e-07	-	-	-	-	-2.34314	6.49311e-11	-	-	7.30442	2.26073e-10	yes
524	277.12	29289.3	yes	substrate	no	yes	alpha-Ribazole	C05775	yes	no	Imidazole Nucleosides and Nucleotides	2	C05775; C18753	C14H18N2O4	-0.910463	1.26736e-05	-0.89688	2.31639e-07	-0.907658	4.58105e-13	-0.844781	1.92061e-07	CL;F4;F5;hive	-	-	-	-	-1.80702	1.53543e-11	-2.13189	1.54895e-11	-1.94777	1.86207e-11	-	-	-	-	-1.72994	2.40259e-10	-	-	3.66678	9.90621e-13	yes
525	277.181	1.27777e+06	no	no	no	no	Panaxytriol	C16792	no	no	Fatty Alcohols	1	C16792	C17H26O3	-0.799453	0.106016	-0.4854	0.0397245	-0.527245	0.0223506	-0.31108	0.119945	F5	-	-	-	-	-	-	-	-	-1.43473	0.0301129	-	-	-	-	-	-	-	-	-0.228302	0.0773205	no
526	277.217	417269	no	no	no	no	(6Z,9Z,12Z)-Octadecatrienoic acid	C06426	no	no	Lineolic Acids and Derivatives	6	C06426; C06427; C07289; C08315; C08364; C15201	C18H30O2	-4.76146	0.0301208	-1.95163	0.00551608	-3.08396	0.0026085	-1.70025	0.0138712	A1	1.84089	0.000414637	-	-	-	-	-	-	-	-	-	-	-	-	-	-	-	-	5.07013	1.45146e-06	no
527	278.16	10249	no	no	no	no	Tiocarbazil	C18898	no	no	-	1	C18898	C16H25NOS	-0.0270183	0.838694	0.10045	0.0895272	0.0350921	0.649876	0.0058705	0.974499	F4;G;S	-	-	-	-	-	-	-1.31534	0.00152559	-	-	-	-	2.37339	1.75051e-09	-	-	0.91946	0.0131669	1.53447	1.31128e-15	no
528	279.233	341709	no	no	no	yes	Linoleate	C01595	yes	no	Lineolic Acids and Derivatives	5	C01595; C04056; C08282; C08321; C08459	C18H32O2	-4.96939	0.0319511	-2.19577	0.00610183	-3.29705	0.00233843	-2.0979	0.00746595	A1	2.09773	5.25e-05	-	-	-	-	-	-	-	-	-	-	-	-	-	-	-	-	4.62264	5.70299e-07	yes
529	280.083	10394.3	no	no	no	no	4-Hydroxyphenylacetylglutamic acid	C05595	no	no	Amino Acids and Derivatives	2	C05595; C18938	C13H15NO6	0.209945	0.0728531	0.320924	0.0169889	0.274154	0.00233843	-0.192009	0.285259		-	-	-	-	-	-	-	-	-	-	-	-	-	-	-	-	-	-	4.52657	0.00591612	yes
530	280.13	16581.4	no	no	no	no	Pendimethalin	C11019	yes	no	-	1	C11019	C13H19N3O4	0.081051	0.452824	3.96493	9.62214e-05	3.41328	0.000623347	-0.218983	0.0315444	B;CL;F4	-	-	1.26323	0.00468282	2.26925	1.77017e-11	1.27163	0.00429024	-	-	-	-	-	-	-	-	-	-	3.20932	3.78256e-11	yes
531	281.089	35198.4	yes	substrate	no	yes	8-Oxocoformycin	C02243	yes	no	-	1	C02243	C11H14N4O5	-1.91835	1.16201e-08	-1.56616	2.66477e-09	-1.67856	1.03022e-19	-2.07599	5.10696e-09	CL;F4;F5;G;hive	-	-	-	-	-1.96357	1.53221e-11	-1.97695	1.53225e-11	-1.92983	1.53232e-11	-	-	-1.05751	8.01762e-09	-2.26164	1.53221e-11	-	-	3.64827	1.6499e-13	yes
532	281.176	40160	yes	product	no	yes	12-trans-Hydroxy juvenile hormone III	C16508	no	no	-	1	C16508	C16H26O4	1.22037	0.00028229	1.17061	7.42639e-07	1.20644	9.37806e-10	0.856383	0.00104435	B;CL;hive	-	-	2.61075	2.00829e-11	1.67396	1.7811e-09	-	-	-	-	-	-	-	-	1.08446	0.00760521	-	-	1.23604	3.79925e-09	no
533	281.191	10001	no	no	no	no	all-trans-Dehydroretinal	C05918	no	no	Prenol Lipids	2	C05918; C05919	C20H26O	-0.00810194	0.968795	0.307456	0.232782	0.248131	0.238637	-0.30888	0.221246		-	-	-	-	-	-	-	-	-	-	-	-	-	-	-	-	-	-	0.849171	3.96542e-08	no
534	281.212	26836.9	no	no	no	no	6-Oxabicyclo[3.1.0]hexane-2-undecanoic acid methyl ester	C15465	no	no	-	1	C15465	C17H30O3	-0.444729	0.0638044	-0.0791594	0.716119	-0.230845	0.141385	0.170675	0.264018	A1	2.69921	6.68e-08	-	-	-	-	-	-	-	-	-	-	-	-	-	-	-	-	0.951016	2.46533e-08	no
535	282.038	116902	no	no	no	yes	N2-Acetyl-L-aminoadipyl-delta-phosphate	C12987	no	no	-	1	C12987	C8H14NO8P	0.0394138	0.54106	0.0474467	0.433002	0.0458441	0.276938	-0.24824	0.00446594	hive	-	-	-	-	-	-	-	-	-	-	-	-	-	-	-1.63646	0.0129147	-	-	-0.430515	0.0250518	yes
536	282.085	53741.2	yes	substrate	no	no	Guanosine	C00387	yes	no	Purine Nucleosides and Analogues	2	C00387; C08432	C10H13N5O5	-0.699021	0.000794128	-0.843692	0.000289182	-0.805043	2.21915e-06	1.29363	0.0168466	B;CL;F4;F5;G;hive	-	-	-1.11523	0.000817276	-0.766637	0.00364979	-0.855257	0.0251378	-0.919931	0.011451	-	-	1.10008	0.00101492	2.51302	1.55286e-11	-	-	7.28051	2.7476e-11	yes
537	283.068	29020.5	yes	substrate	no	yes	Xanthosine	C01762	yes	no	Purine Nucleosides and Analogues	1	C01762	C10H12N4O6	-0.842754	4.50833e-05	-0.921682	1.93816e-07	-0.891247	1.89748e-12	-1.41211	7.13628e-09	B;CL;F4;Fp;G;hive;S	-	-	-2.01228	2.32653e-11	-1.54549	2.09303e-11	-1.8406	2.02457e-10	-	-	-0.99992	1.93534e-05	-1.03817	0.000390284	-2.0435	1.9846e-11	0.604751	0.0359262	4.64741	2.95691e-11	yes
538	283.105	36788.9	yes	substrate	no	yes	Coformycin	C01677	yes	no	-	1	C01677	C11H16N4O5	-0.271907	0.00803676	-0.541259	0.00065706	-0.44514	1.07088e-05	-0.778469	5.07034e-05	B;CL;F4;F5;Fp;hive	-	-	-2.28425	6.67242e-07	-1.7535	5.28159e-07	-2.35076	3.15416e-07	-1.71746	0.000306401	-1.30943	0.00110541	-	-	-2.33749	3.66369e-07	-	-	2.61857	1.94781e-12	yes
539	283.109	28527.6	no	no	no	yes	Metominostrobin	C18559	yes	no	-	1	C18559	C16H16N2O3	-0.15451	0.245167	-0.255474	0.0185688	-0.218645	0.00520135	-0.611338	3.71011e-05	A1;B;CL;F4;F5;hive	-1.2704	0.0354428	-1.8546	0.000218677	-0.965978	0.0355977	-2.46712	4.05562e-07	-1.85019	0.00022825	-	-	-	-	-2.05597	2.95367e-05	-	-	2.16878	1.04064e-10	yes
540	283.192	154651	yes	product	yes	yes	(10S)-Juvenile hormone III diol	C16505	no	no	-	1	C16505	C16H28O4	1.74765	0.00036177	2.01669	4.40244e-07	1.9286	9.8651e-11	2.32369	0.00350179	B;CL;hive;S	-	-	1.68669	2.27726e-11	2.02542	1.53225e-11	-	-	-	-	-	-	-	-	2.66337	1.53225e-11	0.618866	0.00363079	1.72466	2.32712e-07	yes
541	283.229	76017.5	no	no	no	yes	2-Methoxy-5Z-hexadecenoic acid	C13792	no	no	-	3	C13792; C13946; C14996	C17H32O3	-0.19474	0.334927	-0.182175	0.0707551	-0.186885	0.0372961	-0.623992	2.6667e-06	A1	2.81367	2.63e-10	-	-	-	-	-	-	-	-	-	-	-	-	-	-	-	-	1.04821	9.66565e-05	yes
542	284.032	38350.5	yes	substrate	no	yes	Riccionidin A	C08728	yes	no	Flavonoids	1	C08728	C15H9O6	-1.73508	1.26736e-05	-1.31228	1.35482e-05	-1.49143	1.73091e-09	-1.62939	3.47996e-06	A1;CL;F5;Fp;G;hive	0.947751	0.00334665	-	-	-1.32606	5.34181e-09	-	-	-1.57429	1.06223e-07	0.636387	0.0350734	1.17616	9.74902e-05	-1.50246	3.75865e-07	-	-	4.20603	2.01038e-11	yes
543	284.126	12929.7	no	no	no	yes	HC Blue No. 2	C19429	yes	no	-	1	C19429	C12H19N3O5	-0.256684	0.0501303	-0.21365	0.0205507	-0.234647	0.000687996	-0.616424	2.94652e-05	CL;F4;G;hive	-	-	-	-	-0.798054	0.0454692	-1.83614	9.821e-06	-	-	-	-	1.06561	0.0394969	-2.01598	1.07211e-06	-	-	2.68069	4.12426e-11	yes
544	284.161	15132.8	no	no	no	no	Leu-Gly-Pro	C01833	yes	no	-	1	C01833	C13H23N3O4	-0.0560541	0.662062	-0.0794888	0.350201	-0.0792711	0.263647	0.716404	0.189296	F4;hive	-	-	-	-	-	-	-1.30131	0.0383823	-	-	-	-	-	-	2.05464	5.81948e-05	-	-	2.43931	5.66104e-10	yes
545	285.041	229239	no	no	no	no	Luteolin	C01514	yes	no	Flavonoids	12	C01514; C05903; C08576; C08720; C10036; C10041; C10097; C10184; C10510; C12134; C17786; C17810	C15H10O6	-1.00883	0.083846	0.0753619	0.85073	-0.398103	0.214283	-0.269932	0.603607	A1	2.54469	1.31e-06	-	-	-	-	-	-	-	-	-	-	-	-	-	-	-	-	4.55458	1.87202e-13	yes
546	285.077	16867.6	no	no	no	no	(-)-Vestitone	C00786	yes	no	Flavonoids	16	C00786; C02675; C02922; C05334; C08844; C08974; C09044; C09282; C09833; C09920; C09975; C10274; C10508; C12434; C16190; C18835	C16H14O5	-0.295512	0.26475	0.216207	0.169952	0.00357326	0.97922	2.12554	0.0252771	hive	-	-	-	-	-	-	-	-	-	-	-	-	-	-	3.49194	1.53e-11	-	-	2.58715	4.42366e-11	yes
547	285.125	13094.8	no	no	no	no	Pilosine	C10610	no	no	Alkaloids	5	C10610; C11697; C11819; C19015; C19076	C16H18N2O3; C8H24N4O3P2	-0.693731	0.000219828	-0.214622	0.0249442	-0.403283	3.39404e-05	-0.168731	0.110532	S	-	-	-	-	-	-	-	-	-	-	-	-	-	-	-	-	1.57907	9.42e-05	0.814729	1.25065e-09	no
548	285.147	17025.9	no	no	no	no	Abacavir	C07624	no	no	Purine Nucleosides and Analogues	1	C07624	C14H18N6O	0.0962888	0.0910782	0.066999	0.401889	0.0773513	0.1279	-0.329039	0.0811485	B;F4;hive	-	-	1.35245	0.00785892	-	-	-2.06593	4.82349e-06	-	-	-	-	-	-	-1.22112	0.0245308	-	-	1.17676	5.6058e-10	no
549	285.207	277939	no	no	no	yes	2,3-Dihydroxycyclopentaneundecanoic acid	C14987	yes	no	-	2	C14987; C19615	C16H30O4	0.920208	0.022289	1.03486	1.21299e-05	0.984108	2.24521e-07	1.16748	0.00319041	A1;CL;hive;S	1.74215	3.27481e-05	-	-	1.44037	5.28259e-06	-	-	-	-	-	-	-	-	1.71129	4.72101e-05	2.18601	3.96966e-10	2.5251	6.77027e-06	yes
550	286.106	13054.7	no	no	no	yes	Clavamycin E	C17365	no	no	-	1	C17365	C11H17N3O6	-0.363743	0.00715757	-0.25319	0.0196089	-0.296591	8.32519e-05	-0.836458	8.82782e-06	B;CL;F4;hive	-	-	-1.08428	0.0443737	-0.85917	0.0303829	-1.63232	0.000195626	-	-	-	-	-	-	-2.34852	3.94665e-08	-	-	3.25815	4.19381e-12	no
551	287.02	20737.7	yes	substrate	no	no	2-Dehydro-3-deoxy-D-arabino-heptonate 7-phosphate	C04691	no	no	-	1	C04691	C7H13O10P	-1.05397	0.00226991	-0.638093	0.000342719	-0.843241	4.51909e-06	-0.648355	0.0345211	F5	-	-	-	-	-	-	-	-	1.30824	0.0228691	-	-	-	-	-	-	-	-	1.07684	4.83748e-07	no
552	287.167	19505.1	no	no	no	yes	6beta-Hydroxy-17beta-estradiol	C03935	no	no	-	5	C03935; C05141; C05301; C14209; C15385	C18H24O3	-0.560788	0.000189438	-0.187193	0.0787245	-0.323189	9.26027e-05	-0.90907	5.09588e-05	F4;hive	-	-	-	-	-	-	-1.99789	2.43071e-07	-	-	-	-	-	-	-2.29081	4.63154e-09	-	-	2.51304	8.28396e-08	no
553	288.073	15064.8	no	no	no	no	N-Succinyl-2-L-amino-6-oxoheptanedioate	C04462	yes	no	Amino Acids and Derivatives	2	C04462; C05537	C11H15NO8	0.0629808	0.800705	0.0652319	0.645767	0.0707753	0.538154	-0.28596	0.0811485		-	-	-	-	-	-	-	-	-	-	-	-	-	-	-	-	-	-	3.30322	1.34012e-09	yes
554	289.033	36005.8	no	no	no	no	Sedoheptulose 7-phosphate	C05382	no	no	-	7	C05382; C06222; C07836; C07838; C19878; C19880; C19882	C7H15O10P	-0.133854	0.642574	-0.0286691	0.841872	-0.0744406	0.567168	-0.160396	0.214453	B	-	-	1.62139	0.0290122	-	-	-	-	-	-	-	-	-	-	-	-	-	-	1.81001	5.52235e-06	yes
555	289.058	15366.4	yes	substrate	no	yes	Isoprothiolane	C11111	yes	no	Carboxylic Acids and Derivatives	1	C11111	C12H18O4S2	-1.68945	0.000121263	-0.571997	9.21547e-05	-1.12139	9.70874e-05	-0.79833	9.60596e-06		-	-	-	-	-	-	-	-	-	-	-	-	-	-	-	-	-	-	4.50034	7.59166e-12	yes
556	289.071	12487	no	no	no	no	cis-3,4-Leucopelargonidin	C03648	yes	no	Flavonoids	14	C03648; C05907; C06562; C08739; C08742; C09030; C09511; C09727; C09728; C09736; C09787; C09796; C14079; C17590	C15H14O6	-0.205454	0.0580109	0.321108	0.0001377	0.126537	0.0796796	0.384091	0.0331741	CL;hive	-	-	-	-	1.54298	0.00020565	-	-	-	-	-	-	-	-	1.88803	0.000703834	-	-	3.18845	2.80347e-09	yes
557	289.181	27943.1	no	no	no	yes	ML-236C	C14043	yes	no	-	1	C14043	C18H26O3	-0.271017	0.0109897	0.475318	0.000134891	0.175239	0.081001	-1.07466	4.67537e-06	B;CL;G;hive;S	-	-	1.40495	0.000672085	1.13012	0.000259774	-	-	-	-	-	-	1.63368	4.25147e-05	-1.52107	0.000169531	1.15442	0.000703934	3.93041	5.07598e-08	yes
558	290.088	80952.8	no	no	no	no	2,7-Anhydro-alpha-N-acetylneuraminic acid	C04521	yes	no	-	3	C04521; C04580; C08341	C11H17NO8	-0.448579	0.0143	-0.132654	0.402976	-0.272296	0.0250079	-0.976295	0.0168786	G;hive	-	-	-	-	-	-	-	-	-	-	-	-	1.35005	0.0314342	-1.5159	0.00902721	-	-	6.85912	1.45416e-12	yes
559	290.967	12801.4	no	no	no	no	alpha-D-Ribose 1,2-cyclic phosphate 5-phosphate	C20440	yes	no	-	1	C20440	C5H10O10P2	0.460317	0.0140481	0.211338	0.0278533	0.301659	0.000231037	-0.00492126	0.978453	A1	1.59257	0.0215636	-	-	-	-	-	-	-	-	-	-	-	-	-	-	-	-	2.41861	5.36287e-11	yes
560	291.015	46745.8	no	no	no	no	5-(3-Hydroxy-4-acetoxybut-1-ynyl)-2,2'-bithiophene	C04711	yes	no	-	1	C04711	C14H12O3S2	0.944329	0.0756228	1.65597	0.0231711	1.47011	0.00622101	0.857807	0.102074	A1;CL	1.8919	0.00304186	-	-	1.45638	0.0025764	-	-	-	-	-	-	-	-	-	-	-	-	4.29146	3.2146e-07	yes
561	291.197	56217.3	no	no	no	yes	12-OPDA	C01226	no	no	-	9	C01226; C04672; C08319; C13816; C14911; C16319; C16320; C16324; C16325	C18H28O3	-0.679706	0.000104557	-0.0935958	0.492456	-0.319978	0.0026026	-0.778612	5.36474e-05	hive;S	-	-	-	-	-	-	-	-	-	-	-	-	-	-	-1.13359	0.0105228	1.99115	8.75146e-10	1.06683	9.3852e-09	yes
562	292.104	18375.6	no	no	no	yes	N-Acetylmuramate	C02713	yes	no	Carbohydrates and Carbohydrate Conjugates	1	C02713	C11H19NO8	-0.0443533	0.722933	-0.101074	0.427307	-0.0848201	0.320042	-0.981636	4.84381e-05	hive	-	-	-	-	-	-	-	-	-	-	-	-	-	-	-2.17357	6.73e-05	-	-	7.22553	3.44022e-12	yes
563	293.031	71487	yes	substrate	no	yes	Tricrozarin A	C10406	yes	no	-	1	C10406	C13H10O8	-1.70193	1.31941e-05	-1.14013	6.15696e-07	-1.29255	2.67955e-13	-0.82608	0.0034718	CL;F5;hive	-	-	-	-	-1.79392	3.76983e-09	-	-	-1.839	3.46243e-06	-	-	-	-	-1.43157	0.000529798	-	-	4.89515	1.13835e-12	yes
564	293.068	32757.9	no	no	no	yes	Cyclic dehypoxanthine futalosine	C17017	no	no	-	1	C17017	C14H14O7	-0.157224	0.363822	0.196239	0.0734223	0.0711424	0.436921	-1.00882	5.60212e-07	Fp;hive	-	-	-	-	-	-	-	-	-	-	1.85602	5.54195e-08	-	-	-1.92486	3.33974e-06	-	-	3.0106	4.51898e-07	no
565	293.081	56280.6	yes	substrate	no	yes	Dehydrocycloguanandin	C10055	yes	no	-	1	C10055	C18H14O4	-0.660722	0.000355905	-0.395818	0.00368185	-0.50591	2.51209e-06	-1.22135	1.86437e-06	CL;Fp;G;hive	-	-	-	-	-0.826893	0.0334465	-	-	-	-	0.993687	0.0112303	1.05286	0.0448292	-1.96821	2.03769e-06	-	-	3.52969	2.31555e-07	yes
566	293.099	114796	yes	substrate	no	yes	N-Glycosyl-L-asparagine	C03411	yes	no	-	1	C03411	C10H18N2O8	-2.3337	2.77764e-05	-1.62959	0.000357299	-1.92924	1.01793e-07	-2.69703	6.63069e-05	A1;CL;F5;Fp;G;hive	1.18831	0.0030449	-	-	-1.03862	0.000351028	-	-	-1.11005	0.0074279	0.923602	0.00658566	1.27764	0.00104639	-1.29792	0.000815709	-	-	7.95607	2.48258e-06	yes
567	293.176	52115.7	no	no	no	no	Phytuberin	C09709	no	no	Prenol Lipids	3	C09709; C10342; C10462	C17H26O4	-0.292396	0.0532602	-0.281926	0.0185047	-0.288537	0.00103197	-0.145771	0.339574	CL;F4;F5	-	-	-	-	-0.997152	0.041505	-1.70652	0.00187486	-2.00576	0.000126055	-	-	-	-	-	-	-	-	-0.133751	0.00592733	yes
568	293.212	109174	yes	substrate	no	yes	(9Z)-(13S)-12,13-Epoxyoctadeca-9,11-dienoic acid	C04594	yes	no	-	11	C04594; C04780; C13798; C14765; C14766; C16316; C16326; C16342; C16346; C19613; C19827	C18H30O3	-1.86055	0.00149809	-1.04838	0.000663419	-1.3743	2.5176e-06	-1.73105	4.94086e-05	A1;CL;F4;hive;S	1.42074	0.000681101	-	-	-0.884702	0.0109829	-1.09493	0.0213015	-	-	-	-	-	-	-1.19693	0.0077918	1.25001	0.000221486	3.90327	1.8576e-11	yes
569	294.049	8703.15	no	no	no	no	Aminoimidazole ribotide	C03373	yes	no	Imidazole Nucleosides and Nucleotides	1	C03373	C8H14N3O7P	-0.319919	0.00234093	-0.51063	0.0415024	-0.440004	0.00549867	-0.549995	0.0291573		-	-	-	-	-	-	-	-	-	-	-	-	-	-	-	-	-	-	3.55358	1.04408e-13	yes
570	294.125	46652.2	no	no	no	no	GYKI 52895	C15094	yes	no	-	1	C15094	C17H17N3O2	-0.0746163	0.538515	-0.253342	0.0222076	-0.193086	0.0195457	-0.661095	0.0157538	hive	-	-	-	-	-	-	-	-	-	-	-	-	-	-	-1.9059	0.00028243	-	-	9.47388	4.70571e-09	yes
571	295.155	12149.8	no	no	no	yes	Graphinone	C09674	no	no	Prenol Lipids	1	C09674	C16H24O5	0.219524	0.0401936	0.631241	0.000178601	0.523753	0.000234251	-0.533875	0.00700689	CL	-	-	-	-	1.53311	9.56e-05	-	-	-	-	-	-	-	-	-	-	-	-	1.63553	7.86016e-13	no
572	295.171	6056.85	no	no	no	no	Ethynyl estradiol	C07534	no	no	Steroids and Steroid Derivatives	6	C07534; C08162; C14391; C15063; C15124; C19730	C20H24O2	0.0739285	0.464438	0.289864	0.0199875	0.226279	0.0137421	0.0511235	0.779805		-	-	-	-	-	-	-	-	-	-	-	-	-	-	-	-	-	-	1.63013	7.32639e-14	no
573	295.192	53084.9	no	no	no	no	10-Deoxymethynolide	C11993	no	no	-	1	C11993	C17H28O4	0.605955	0.00479474	0.479199	0.0106713	0.523416	8.71687e-05	1.12463	0.0109787	B;CL;hive	-	-	1.51052	0.00199165	0.928219	0.0267728	-	-	-	-	-	-	-	-	2.78124	1.63207e-09	-	-	1.12286	2.9285e-07	no
574	295.228	60428.2	yes	substrate	no	yes	(9Z,12Z)-(8R)-Hydroxyoctadeca-9,12-dienoic acid	C08318	yes	no	-	7	C08318; C08368; C14762; C14767; C14825; C14826; C19617	C18H32O3	-2.40485	0.00715757	-1.414	0.000138075	-1.79365	7.11098e-06	-2.09814	2.56336e-05	A1;CL;F4;hive	1.78882	4.87693e-06	-	-	-1.1286	0.000227805	-1.05225	0.0258684	-	-	-	-	-	-	-1.3846	0.000739534	-	-	2.40881	2.55129e-08	yes
575	296.072	190362	yes	substrate	yes	yes	6-Nitrobenzo[a]pyrene	C19472	no	no	-	2	C19472; C19475	C20H11NO2	-3.80093	2.75802e-05	-3.07423	4.84427e-05	-3.38219	8.40464e-09	-4.14665	2.69426e-05	A1;CL;F5;Fp;G;hive;S	1.18559	0.0003403	-	-	-1.25764	2.25353e-07	-	-	-1.27737	8.66162e-05	0.782837	0.00867612	0.887077	0.0188493	-1.34651	3.00344e-05	0.790867	0.00766372	7.42991	2.05214e-07	no
576	297.023	6082.38	no	no	no	no	1-Pyrenylsulfate	C18269	no	no	-	1	C18269	C16H10O4S	-0.233065	0.000256174	-0.215599	0.114441	-0.216694	0.0124135	-0.167185	0.236854		-	-	-	-	-	-	-	-	-	-	-	-	-	-	-	-	-	-	2.23872	2.99957e-13	no
577	297.042	6551.35	no	no	no	no	Bowdichione	C10202	no	no	Flavonoids	5	C10202; C10467; C16226; C19587; C19727	C16H10O6	-0.139066	0.0288316	0.0357419	0.638232	-0.0301259	0.568677	-0.0937642	0.314685		-	-	-	-	-	-	-	-	-	-	-	-	-	-	-	-	-	-	2.21175	8.82039e-12	no
578	297.062	12036.8	yes	substrate	no	yes	D-Prephenyllactate	C00994	yes	no	-	1	C00994	C13H14O8	-0.642907	0.000116805	-0.36449	0.000812266	-0.469344	1.25787e-07	-0.576047	0.00203277	CL;F4;F5;hive	-	-	-	-	-1.28577	0.000145128	-1.28173	0.00951724	-1.93819	8.73922e-06	-	-	-	-	-1.89592	1.42445e-05	-	-	4.91071	1.26254e-10	yes
579	297.107	16341.2	no	no	no	yes	10-(beta-Dimethylaminopropionyl)phenothiazine	C17619	yes	no	-	1	C17619	C17H18N2OS	-0.437491	2.77764e-05	-0.0424901	0.648905	-0.150794	0.081001	-0.678045	5.71879e-05	F4;G;hive	-	-	-	-	-	-	-1.48179	0.00976349	-	-	-	-	-1.35233	0.0263966	-2.39429	1.9457e-06	-	-	3.51664	0.000197749	yes
580	297.207	89558.1	yes	product	no	yes	Plakortic acid	C17158	yes	no	-	1	C17158	C17H30O4	0.847277	0.00347369	1.01602	0.000171503	0.922858	2.04631e-06	1.80276	0.00342701	A1;CL;hive	1.20473	0.00210741	-	-	1.40638	3.73011e-07	-	-	-	-	-	-	-	-	3.42387	1.53358e-11	-	-	2.18397	1.45146e-06	yes
581	297.243	48693.2	no	no	no	yes	2-Oxooctadecanoic acid	C00869	no	no	-	5	C00869; C08365; C13791; C19418; C19616	C18H34O3	-2.34682	0.0179212	-1.74454	6.38743e-05	-1.96918	6.1574e-06	-1.70298	9.06945e-05	A1;B;CL;F4;F5;hive	1.68298	3.74055e-06	-1.29395	0.00068617	-1.37608	6.31982e-07	-1.16467	0.00332263	-1.25208	0.00115656	-	-	-	-	-1.35897	0.000299448	-	-	0.839541	0.000192092	yes
582	298.166	16777.6	yes	substrate	no	yes	Indicine	C10326	no	no	Alkaloids	5	C10326; C10330; C10336; C10347; C10378	C15H25NO5	-0.653026	9.72969e-05	-1.03527	3.06731e-07	-0.899221	3.95618e-11	-1.51789	2.16315e-07	B;CL;F4;Fp;G;hive	-	-	-1.49804	6.41627e-09	-1.75668	1.53487e-11	-2.5999	1.53245e-11	-	-	-0.938755	9.17775e-06	-0.730797	0.0138623	-2.2326	1.53634e-11	-	-	2.87206	5.69866e-09	no
583	298.276	2780.31	no	no	no	no	Sphingosine	C00319	no	no	Sphingolipids	3	C00319; C02934; C16512	C18H37NO2	1.12065	0.579015	-3.23688	0.017476	-1.76101	0.0519233	-3.04667	0.0167996	B;CL	-	-	1.77181	0.000364992	-1.04615	0.0131926	-	-	-	-	-	-	-	-	-	-	-	-	0.680047	5.84494e-05	no
584	299.02	21083.9	yes	substrate	no	yes	Pseudopurpurin	C10394	yes	no	-	1	C10394	C15H8O7	-1.49324	1.13327e-05	-1.01879	2.79899e-05	-1.21187	1.92386e-09	-0.909551	0.00576369	CL;F5;hive	-	-	-	-	-1.72993	5.92942e-09	-	-	-1.72677	8.96311e-06	-	-	-	-	-1.59733	4.71963e-05	-	-	4.33302	6.82034e-12	yes
585	299.077	23137.5	yes	substrate	no	yes	4-(beta-D-Glucosyloxy)benzoate	C03993	yes	no	-	1	C03993	C13H16O8	-1.45194	1.93655e-05	-0.812775	0.000861012	-1.00681	4.18046e-08	-1.39169	4.18532e-05	A1;CL;F5;Fp;hive	2.20426	1.18001e-07	-	-	-0.827375	0.0344223	-	-	-1.05008	0.0473791	-0.906159	0.0309866	-	-	-1.18883	0.0137661	-	-	2.6898	5.73677e-12	yes
586	300.049	68174.4	yes	substrate	no	yes	N-Acetyl-D-glucosamine 6-phosphate	C00357	yes	no	Monosaccharides	7	C00357; C04256; C04257; C04501; C06376; C18055; C18060	C8H16NO9P	-1.29878	2.19638e-06	-1.28143	2.35024e-07	-1.29262	1.86276e-13	-1.19727	1.78392e-07	B;CL;F5;Fp;G;hive;S	-	-	-0.757016	0.00471647	-1.88242	1.53245e-11	-	-	-1.85032	1.60282e-11	-1.19423	3.40412e-09	-1.00401	4.34739e-05	-1.80339	1.70962e-11	0.733392	0.000412721	2.36511	5.63916e-08	yes
587	300.157	10206.8	no	no	no	no	(Ac)2-L-Lys-D-Ala	C02487	no	no	-	1	C02487	C13H23N3O5	0.110815	0.284409	0.276106	0.00164099	0.199235	0.00594527	0.0620147	0.670327	B;CL;F4;G	-	-	1.49286	0.00028548	0.981231	0.00285899	-1.64577	4.50432e-05	-	-	-	-	2.02482	3.60759e-07	-	-	-	-	2.36183	2.98908e-09	no
588	301	17908.7	no	no	no	no	Ellagic acid	C10788	no	no	Pyrans	1	C10788	C14H6O8	-1.11826	0.0016827	-0.549918	0.0184351	-0.760172	4.71687e-05	-0.365343	0.373405		-	-	-	-	-	-	-	-	-	-	-	-	-	-	-	-	-	-	2.91343	2.00523e-12	no
589	301.035	354014	no	no	no	no	Quercetin	C00389	yes	no	Flavonoids	12	C00389; C02806; C03662; C08577; C10068; C10072; C10078; C10079; C10105; C10177; C10192; C15031	C15H10O7	-1.98283	0.00387524	-1.07523	0.0211171	-1.41643	0.000106892	-0.536879	0.526423		-	-	-	-	-	-	-	-	-	-	-	-	-	-	-	-	-	-	3.93563	3.03046e-11	yes
590	301.166	20112.9	yes	product	no	no	Tributyrin	C13870	no	no	Glycerolipids	1	C13870	C15H26O6	0.423834	0.00167425	0.667628	4.34203e-07	0.566612	3.78991e-10	1.48655	0.0210078	CL;hive	-	-	-	-	1.14513	4.50208e-05	-	-	-	-	-	-	-	-	3.50701	1.53307e-11	-	-	1.2379	6.65563e-08	no
591	302.136	16510.5	no	no	no	yes	Nicotianamine	C05324	yes	no	-	1	C05324	C12H21N3O6	-0.269655	0.13216	-0.145782	0.299088	-0.197158	0.0474557	-0.887723	0.00464736	F4;G;hive	-	-	-	-	-	-	-1.4669	0.0020642	-	-	-	-	1.86997	2.86592e-05	-1.72691	0.000138386	-	-	4.06707	1.33356e-12	yes
592	303.155	15294.9	no	no	no	yes	Discadenine	C01804	no	no	-	1	C01804	C14H20N6O2	-0.368639	0.00388372	0.0295405	0.799862	-0.112172	0.178276	-1.34025	3.48892e-06	F4;hive	-	-	-	-	-	-	-1.72889	1.41135e-05	-	-	-	-	-	-	-2.34756	4.34143e-09	-	-	2.59687	5.06711e-10	no
593	303.182	12891.9	no	no	no	no	CPX	C13709	no	no	-	1	C13709	C16H24N4O2	-0.222348	0.0912345	0.113077	0.245141	-0.0100862	0.894614	-0.189874	0.344144	F5	-	-	-	-	-	-	-	-	1.48399	0.0126436	-	-	-	-	-	-	-	-	1.37281	1.36105e-08	no
594	303.197	12719.9	yes	substrate	no	yes	16alpha-Hydroxydehydroepiandrosterone	C05139	no	no	Steroids and Steroid Derivatives	17	C05139; C05291; C05294; C14497; C14552; C14600; C14627; C14649; C14671; C14912; C15144; C15286; C15306; C15332; C15416; C18045; C18075	C19H28O3	-1.67277	1.26736e-05	-1.28221	2.72169e-08	-1.41288	2.95045e-14	-2.27869	8.85593e-09	A1;B;CL;F4;G;hive	-0.852358	0.00299746	-1.91547	1.96946e-11	-1.63822	1.54318e-11	-1.1068	3.37074e-05	-	-	-	-	0.723055	0.0218156	-2.20879	1.5394e-11	-	-	1.09559	2.15297e-07	no
595	304.034	15004.2	yes	substrate	no	yes	3',5'-Cyclic CMP	C00941	yes	no	-	2	C00941; C02354	C9H12N3O7P	-0.460571	0.000841822	-0.69953	3.12288e-07	-0.616664	1.62149e-09	-0.896257	4.11079e-05	CL;F5;G;hive	-	-	-	-	-1.49975	1.33589e-10	-	-	-2.11482	2.50792e-11	-	-	0.906199	0.00659784	-1.80613	2.18566e-09	-	-	6.68883	4.58288e-09	yes
596	305.018	19760.6	no	no	no	yes	2',3'-Cyclic UMP	C02355	yes	no	Pyrimidine Nucleotides	1	C02355	C9H11N2O8P	0.591178	0.011762	0.327838	0.00645335	0.419286	0.00231097	1.20259	0.00881941	G;hive	-	-	-	-	-	-	-	-	-	-	-	-	2.17931	5.24202e-11	2.74965	1.53694e-11	-	-	6.29913	1.13844e-08	yes
597	305.045	26098.5	yes	substrate	no	yes	Kinobscurinone	C12391	yes	no	-	1	C12391	C18H10O5	-0.363752	0.000376898	-0.393691	0.0006151	-0.380126	1.37981e-06	-0.465081	0.000142318	CL;F5;hive	-	-	-	-	-1.52882	6.51366e-05	-	-	-1.98288	8.47187e-05	-	-	-	-	-1.76407	0.000680832	-	-	4.05279	3.28414e-13	yes
598	305.137	9201.54	no	no	no	no	Lupinate	C01513	no	no	-	1	C01513	C13H18N6O3	0.144327	0.195748	0.247891	0.00766623	0.200718	0.00260309	-0.0261907	0.847148	B;CL;G	-	-	1.42881	0.00955698	0.963859	0.034274	-	-	-	-	-	-	2.09248	1.78234e-05	-	-	-	-	1.89568	7.27913e-10	no
599	305.162	15400.9	no	no	no	yes	Bz-Arg-OEt	C01670	no	no	-	2	C01670; C18325	C15H22N4O3	-0.0278328	0.794093	0.145962	0.299088	0.0736169	0.417697	-0.799915	0.00100683	F4;hive	-	-	-	-	-	-	-1.55411	0.0047557	-	-	-	-	-	-	-1.6207	0.00268885	-	-	2.64837	3.2146e-07	no
600	305.249	8232.4	yes	substrate	no	yes	(8Z,11Z,14Z)-Icosatrienoic acid	C03242	no	no	Fatty Acids and Conjugates	8	C03242; C09072; C13273; C14882; C15058; C15376; C15399; C16522	C20H34O2	-2.90738	0.00945726	-1.20264	0.00229497	-1.86104	0.000157061	-1.83476	0.000254117	A1;G	1.21902	0.0361668	-	-	-	-	-	-	-	-	-	-	1.59741	0.00135988	-	-	-	-	2.34353	0.000174257	no
601	306.051	20343.4	no	no	no	yes	dCMP	C00239	no	no	Pyrimidine Nucleotides	1	C00239	C9H14N3O7P	-0.0611387	0.617417	0.109116	0.118669	0.0575461	0.34846	0.320587	0.0023979	hive	-	-	-	-	-	-	-	-	-	-	-	-	-	-	2.28069	0.000107524	-	-	3.05738	1.80113e-09	no
602	306.077	301830	no	no	no	yes	Glutathione	C00051	yes	no	Peptides	2	C00051; C12392	C10H17N3O6S; C18H13NO4	0.234944	0.174657	0.308753	0.0551643	0.300285	0.0192064	0.643418	0.00876458	hive	-	-	-	-	-	-	-	-	-	-	-	-	-	-	1.86855	0.000647809	-	-	3.77779	1.31586e-07	yes
603	307	36652.1	no	no	no	no	(R)-5-Diphosphomevalonate	C01143	yes	no	Organic Oxoanionic Compounds	3	C01143; C20423; C20848	C6H14O10P2	0.315068	0.0545773	0.217466	0.0903043	0.251547	0.00572088	-0.309368	0.0906476	A1;F5	-1.3898	0.00204792	-	-	-	-	-	-	1.94509	3.54462e-06	-	-	-	-	-	-	-	-	3.41608	7.69134e-12	yes
604	307.098	18945.6	yes	substrate	no	yes	Warfarin	C01541	yes	no	Pyrans	3	C01541; C17743; C20129	C19H16O4	-0.809216	8.0437e-05	-0.555989	0.000111146	-0.645284	7.46084e-10	-1.31761	8.26729e-07	CL;F5;Fp;G;hive	-	-	-	-	-1.27293	8.90907e-06	-	-	-1.30479	0.00100103	-1.03596	0.00176277	-0.96223	0.0412727	-2.38339	4.89004e-10	-	-	3.32454	5.04396e-13	yes
605	307.151	602740	yes	substrate	no	yes	Fructoselysine	C16488	yes	no	-	1	C16488	C12H24N2O7	-1.67516	1.26736e-05	-1.60401	3.68765e-06	-1.64491	1.41751e-11	-3.20277	6.04874e-07	B;CL;F5;Fp;G;hive	-	-	0.874754	0.00716856	-1.57512	2.27405e-11	-	-	-1.59647	3.85848e-08	-1.33781	2.365e-08	-1.06119	0.000423249	-2.09234	2.03839e-11	-	-	3.86644	3.87879e-07	yes
606	307.156	382868	yes	substrate	no	yes	Inulicin	C09483	no	no	-	2	C09483; C09638	C17H24O5	-1.49269	6.88962e-05	-0.833919	0.000372297	-1.06983	2.46581e-08	-2.9224	1.14055e-06	B;CL;F5;Fp;G;hive	-	-	1.58591	1.24974e-06	-0.924626	0.000338212	-	-	-1.42482	1.51952e-05	-1.13373	3.19437e-05	-0.931383	0.0144921	-1.8284	2.64691e-08	-	-	3.49841	1.21804e-07	no
607	307.191	88267.5	yes	product	no	yes	5-O-Methylembelin	C10373	yes	no	Benzoquinones	2	C10373; C15818	C18H28O4	0.641099	0.00507707	1.5006	6.20085e-06	1.16862	3.63926e-08	0.541024	0.00960746	B;CL;S	-	-	2.7824	1.53427e-11	1.89725	1.54196e-11	-	-	-	-	-	-	-	-	-	-	0.836901	0.00186839	2.90912	1.80514e-07	yes
608	307.264	7803.97	yes	substrate	no	yes	Sclareol	C09183	no	no	Prenol Lipids	2	C09183; C16525	C20H36O2	-3.03623	0.00475022	-1.36709	0.00163549	-1.95039	1.88318e-05	-2.38437	0.000156225	A1	1.48533	0.00658507	-	-	-	-	-	-	-	-	-	-	-	-	-	-	-	-	1.99819	7.65989e-07	no
609	308.099	41595.3	yes	substrate	no	yes	N-Acetylneuraminate	C00270	yes	no	-	4	C00270; C03525; C19909; C19910	C11H19NO9	-1.21345	6.88962e-05	-1.24483	4.50588e-06	-1.2386	1.2754e-11	-2.41013	4.13128e-07	CL;F4;F5;G;hive	-	-	-	-	-1.36237	2.8109e-09	-0.749791	0.0485763	-1.03177	0.00105961	-	-	1.8226	1.61279e-09	-1.91345	3.37478e-10	-	-	7.06424	5.16066e-08	yes
610	309.099	15998.7	no	no	no	yes	trans-Cinnamoyl beta-D-glucoside	C04164	yes	no	-	3	C04164; C09502; C09528	C15H18O7	-0.120366	0.334788	0.260851	0.00438619	0.145508	0.0792394	-0.770419	0.000105925	CL;F4;hive	-	-	-	-	0.973771	0.000973075	-1.57669	2.07106e-05	-	-	-	-	-	-	-2.03295	3.50269e-08	-	-	4.27931	5.28559e-09	yes
611	309.111	17840.7	no	no	no	no	7-Hydroxy-3-(4-methoxyphenyl)-4-propyl-2H-1-benzopyran-2-one	C15051	no	no	-	1	C15051	C19H18O4	0.076861	0.315729	0.0277278	0.789194	0.0516393	0.480233	-0.167837	0.140615	F4	-	-	-	-	-	-	-1.75121	0.0153031	-	-	-	-	-	-	-	-	-	-	0.157183	0.646314	no
612	309.207	607500	no	no	no	yes	13(S)-HPOT	C04785	no	no	-	7	C04785; C07357; C15753; C16321; C16341; C19936; C20704	C18H30O4	1.21603	0.0129575	1.65058	1.68831e-06	1.465	6.9458e-09	2.10913	8.77761e-05	B;CL;hive	-	-	3.2284	1.53221e-11	1.34951	2.25131e-10	-	-	-	-	-	-	-	-	2.09043	1.59243e-11	-	-	3.94047	8.45222e-07	no
613	309.28	25707.4	no	no	no	yes	Prostanoic acid	C02064	no	no	-	2	C02064; C16526	C20H38O2	-2.28381	0.00529535	-0.747095	0.0489809	-1.26658	0.000234251	-1.06105	0.00168871	S	-	-	-	-	-	-	-	-	-	-	-	-	-	-	-	-	1.77084	2.69e-06	1.86973	5.38559e-07	yes
614	310.131	9906.66	no	no	no	yes	Domoic acid	C13732	no	no	Amino Acids and Derivatives	2	C13732; C20027	C15H21NO6	0.310941	0.0550206	0.373345	8.10448e-05	0.356355	5.52497e-06	-0.514403	0.000132549	CL;F4	-	-	-	-	1.04756	0.0157414	1.67734	0.00118342	-	-	-	-	-	-	-	-	-	-	3.89212	2.98247e-11	no
615	311.187	110038	yes	product	no	yes	Granisetron	C07023	no	no	-	1	C07023	C18H24N4O	0.695464	0.00278919	0.762243	0.00155586	0.722181	1.38646e-05	1.87428	0.00612357	B;CL;hive	-	-	1.20612	0.000434241	0.912765	0.000474197	-	-	-	-	-	-	-	-	3.49593	1.53232e-11	-	-	1.16527	4.77891e-06	yes
616	311.223	2.85007e+06	no	no	no	yes	(9Z,11E)-(13S)-13-Hydroperoxyoctadeca-9,11-dienoic acid	C04717	no	no	Lineolic Acids and Derivatives	12	C04717; C07338; C07354; C14827; C14831; C14832; C14834; C14836; C19618; C19937; C20186; C20703	C18H32O4	-0.0189107	0.949082	0.158136	0.592194	0.0665987	0.734609	0.991858	0.000160445	A1;B;F4;hive	1.28541	0.0367323	1.26537	0.0424122	-	-	-1.26177	0.0435099	-	-	-	-	-	-	1.99758	7.25002e-05	-	-	4.42537	2.41949e-06	no
617	312.036	7547.83	yes	substrate	no	no	Isazofos	C19001	no	no	-	1	C19001	C9H17ClN3O3PS	-0.597973	0.00013543	-0.482144	0.000663419	-0.532893	1.59658e-07	-0.106222	0.314341	A1;B;CL;F5	1.17168	0.0115686	1.46756	0.000485253	-1.18384	0.000173023	-	-	-1.42301	0.000805154	-	-	-	-	-	-	-	-	3.99933	6.41334e-10	no
618	312.122	10714.1	no	no	no	no	N-Feruloyltyramine	C02717	no	no	Phenols and Derivatives	4	C02717; C08513; C11017; C16984	C18H19NO4	-0.132462	0.33779	-0.0395506	0.614489	-0.0742504	0.214586	-0.0622639	0.487903	Fp	-	-	-	-	-	-	-	-	-	-	1.6913	0.000436564	-	-	-	-	-	-	3.41389	6.04436e-13	no
619	312.182	31002.5	yes	substrate	no	yes	Heliotrine	C10324	no	no	Alkaloids	1	C10324	C16H27NO5	-0.927367	7.72416e-06	-1.11488	1.59286e-06	-1.04861	7.80629e-12	-0.805707	4.94086e-05	CL;F4;hive	-	-	-	-	-1.8553	1.57027e-11	-2.50457	1.55015e-11	-	-	-	-	-	-	-1.47494	2.60274e-06	-	-	2.33905	2.23499e-07	no
620	312.254	23748.6	no	no	no	yes	(+)-Prosopinine	C10167	no	no	Alkaloids	1	C10167	C18H35NO3	0.177492	0.448925	0.361738	0.334583	0.270039	0.249473	1.20185	0.00445279	A1	3.12047	6.37e-11	-	-	-	-	-	-	-	-	-	-	-	-	-	-	-	-	1.77379	3.0334e-07	no
621	313.036	13534	yes	substrate	no	no	Wedelolactone	C10541	yes	no	Flavonoids	1	C10541	C16H10O7	-0.952413	2.77764e-05	-0.463079	0.00135506	-0.665574	8.80762e-07	-0.0331465	0.863872	CL;Fp;G;S	-	-	-	-	-0.958053	0.00950096	-	-	-	-	1.5422	1.28268e-05	1.20849	0.0152338	-	-	0.893017	0.0449279	3.97318	7.12575e-10	yes
622	313.057	11118.8	no	no	no	no	Dantrolene	C06939	yes	no	Nitrobenzenes	1	C06939	C14H10N4O5	-0.215829	0.00280858	-0.562053	0.0996756	-0.437503	0.0265698	-0.97747	0.0163318	hive	-	-	-	-	-	-	-	-	-	-	-	-	-	-	-1.60368	0.0401659	-	-	3.46454	1.97802e-12	yes
623	313.087	14665.5	yes	substrate	no	yes	Epithienamycin A	C17372	yes	no	-	3	C17372; C17377; C17397	C13H18N2O5S	-0.659028	1.43637e-05	-0.461101	0.000294316	-0.54843	7.90484e-08	-0.611623	6.98992e-05	CL;F4;hive	-	-	-	-	-1.4311	2.85929e-06	-1.75896	1.33282e-05	-	-	-	-	-	-	-1.8076	7.25041e-06	-	-	3.8227	2.91641e-09	yes
624	313.239	2.88911e+06	yes	substrate	no	yes	9,10-Epoxy-18-hydroxystearate	C07355	yes	omega hydroxy acid	-	5	C07355; C14828; C14829; C19620; C20702	C18H34O4	-2.17691	1.01652e-06	-1.40539	0.000606318	-1.72844	1.11019e-07	-1.54757	0.000403481	B;CL;F4;hive	-	-	-1.53505	0.000316283	-1.19252	0.000217939	-1.43281	0.00099172	-	-	-	-	-	-	-1.26039	0.00609458	-	-	4.97518	0.000247248	yes
625	315.051	265422	no	no	no	yes	3-O-Methylquercetin	C04443	yes	no	Flavonoids	10	C04443; C08999; C10022; C10084; C10119; C10120; C10176; C10185; C10188; C19739	C16H12O7	-1.98984	0.00199037	-0.675246	0.0442904	-1.11576	0.000138496	-2.12585	7.25909e-05	A1	1.76092	0.000217263	-	-	-	-	-	-	-	-	-	-	-	-	-	-	-	-	4.42929	2.14588e-08	yes
626	315.085	76114.4	yes	substrate	yes	yes	SC-57666	C11706	no	no	-	1	C11706	C18H17FO2S	-3.39176	0.000332581	-1.82842	8.63177e-05	-2.61382	2.08575e-05	-2.50701	2.77043e-05	B;F4;F5;S	-	-	1.25497	0.000853994	-	-	1.45246	6.2934e-05	1.61313	6.7375e-06	-	-	-	-	-	-	0.966008	0.00238945	3.45888	1.04879e-08	no
627	315.254	209934	yes	substrate	yes	yes	9,10-Dihydroxystearate	C08314	no	omega hydroxy acid	-	3	C08314; C15988; C19622	C18H36O4	-2.98956	0.000616787	-2.12169	0.000116254	-2.54256	1.70882e-06	-1.86098	0.000170224	A1;B;CL;hive;S	1.3864	0.00066266	-1.18242	0.00655515	-1.14609	0.000155787	-	-	-	-	-	-	-	-	-1.07837	0.0190018	0.805741	0.0487942	3.24806	0.00106885	yes
628	317.03	49789.9	no	no	no	no	Gossypetin	C04109	yes	no	Flavonoids	3	C04109; C10107; C10122	C15H10O8	-0.415359	0.574675	0.346626	0.556794	0.137178	0.756689	-1.02176	0.0904038	A1	2.04189	0.000814219	-	-	-	-	-	-	-	-	-	-	-	-	-	-	-	-	4.335	1.46217e-07	yes
629	317.067	43062.2	no	no	no	no	Lecanoric acid	C02868	yes	no	-	2	C02868; C15504	C16H14O7	-0.869862	5.90588e-05	-0.285347	0.194903	-0.512367	0.00094239	-0.000584856	0.998513		-	-	-	-	-	-	-	-	-	-	-	-	-	-	-	-	-	-	5.92854	4.94149e-10	yes
630	317.137	12520.5	no	no	no	yes	Zearalenone	C09981	no	no	Macrolides and Analogues	1	C09981	C18H22O5	0.226289	0.0201096	0.0786419	0.421489	0.124506	0.119043	-0.75242	0.00537419	G;hive	-	-	-	-	-	-	-	-	-	-	-	-	1.23879	0.0207682	-1.87295	3.94297e-05	-	-	3.83635	9.62927e-14	no
631	317.197	32947.2	no	no	no	no	(-)-Menthyl O-beta-D-glucoside	C03962	yes	no	Prenol Lipids	2	C03962; C04165	C16H30O6	0.186598	0.597707	0.348884	0.0166124	0.280735	0.0428095	-0.135386	0.644691	S	-	-	-	-	-	-	-	-	-	-	-	-	-	-	-	-	1.38725	0.022748	3.33634	5.78213e-12	yes
632	319.148	8403.72	yes	product	no	no	11beta-Chloromethylestradiol	C14307	no	no	-	2	C14307; C15010	C19H25ClO2	1.14795	0.000589001	0.836261	3.64904e-06	0.948093	9.53657e-08	-0.282929	0.0224716	B;CL;G	-	-	1.23013	0.000296771	2.20226	1.53594e-11	-	-	-	-	-	-	0.858256	0.0350465	-	-	-	-	1.78253	6.64281e-09	no
633	321.024	25365.2	no	no	no	no	Digallate	C01572	no	no	-	1	C01572	C14H10O9	0.330935	0.0214512	0.190559	0.0128058	0.242231	0.000151074	0.0465629	0.533489	CL	-	-	-	-	1.30251	0.00799145	-	-	-	-	-	-	-	-	-	-	-	-	0.389218	2.30666e-08	yes
634	321.113	8844.32	no	no	no	yes	N-((R)-Pantothenoyl)-L-cysteine	C04079	no	no	Peptidomimetics	5	C04079; C09318; C10514; C11324; C11325	C12H22N2O6S; C20H18O4	0.073978	0.311233	0.268643	4.14377e-05	0.199562	2.83364e-05	0.656834	0.00887178	CL;hive	-	-	-	-	1.15924	0.000180643	-	-	-	-	-	-	-	-	3.26588	1.54162e-11	-	-	1.59584	8.58153e-13	no
635	321.131	21351.7	no	no	no	yes	2'-Deamino-2'-hydroxy-6'-dehydroparomamine	C20351	yes	no	-	1	C20351	C12H22N2O8	-0.423425	0.000690465	-0.0605154	0.731863	-0.162229	0.205954	-0.619544	0.0011672		-	-	-	-	-	-	-	-	-	-	-	-	-	-	-	-	-	-	2.55364	2.36842e-16	yes
636	321.171	18553.5	yes	product	no	no	alpha-Zearalanol	C14752	no	no	Macrolides and Analogues	2	C14752; C14753	C18H26O5	0.516505	0.000497364	0.939288	7.57277e-05	0.80447	2.09452e-06	-0.134683	0.285259	B;CL	-	-	2.82165	1.53569e-11	1.80389	1.72983e-11	-	-	-	-	-	-	-	-	-	-	-	-	1.86153	1.13556e-13	yes
637	321.208	8615.31	no	no	no	no	Rapanone	C10399	no	no	-	4	C10399; C15494; C17495; C20853	C19H30O4	0.357839	0.00768077	-0.070796	0.647753	0.0825554	0.433814	0.0603175	0.838476		-	-	-	-	-	-	-	-	-	-	-	-	-	-	-	-	-	-	0.470612	3.79332e-05	no
638	322.045	28192.7	no	no	no	yes	CMP	C00055	yes	no	Pyrimidine Nucleotides	3	C00055; C03104; C05822	C9H14N3O8P	0.201267	0.084206	0.114028	0.139663	0.137792	0.0551493	2.62099	0.00948603	hive	-	-	-	-	-	-	-	-	-	-	-	-	-	-	3.66826	1.53e-11	-	-	3.90522	3.81483e-09	yes
639	322.129	9587.43	yes	substrate	no	yes	Acremoauxin A	C08468	yes	no	-	1	C08468	C16H21NO6	-0.943689	0.00319187	-0.711578	0.000842818	-0.79864	1.74406e-06	-1.24683	2.78831e-05	CL;F5;hive	-	-	-	-	-1.30389	0.000550368	-	-	-1.55707	0.00242089	-	-	-	-	-1.93777	5.8669e-05	-	-	3.35249	5.23665e-09	yes
640	322.163	9830.07	no	no	no	no	Paromamine	C01743	no	no	-	2	C01743; C20350	C12H25N3O7	-0.0447988	0.593826	0.0124852	0.880058	-0.00806712	0.884946	-0.360431	0.0265415	F4;F5;hive	-	-	-	-	-	-	-2.08368	6.72643e-06	-1.55162	0.00167379	-	-	-	-	-1.44694	0.0044605	-	-	1.70219	6.06546e-13	no
641	322.967	84437	no	no	no	yes	Azamethiphos	C18702	no	no	-	1	C18702	C9H10ClN2O5PS	-0.472088	0.0190195	-1.28554	0.000435874	-1.01432	5.62243e-05	-1.56465	0.000170224	B;CL;F4;F5;G;hive	-	-	-1.86828	0.000553197	-1.61233	5.5113e-05	-1.52761	0.00959353	-1.65381	0.00348934	-	-	-1.61905	0.00463785	-1.8096	0.000928072	-	-	4.48974	3.18892e-09	no
642	323.029	167989	no	no	no	yes	UMP	C00105	yes	no	Pyrimidine Nucleotides	4	C00105; C01168; C01368; C03031	C9H13N2O9P	0.10637	0.494605	0.314604	0.000431505	0.216771	0.0130818	1.19417	0.00606853	hive	-	-	-	-	-	-	-	-	-	-	-	-	-	-	3.20356	1.53e-11	-	-	2.75846	5.33093e-10	yes
643	323.098	31118	no	no	no	no	Bis-D-fructose 2',1:2,1'-dianhydride	C04333	yes	no	-	2	C04333; C04420	C12H20O10	0.0998753	0.232604	0.0483992	0.30798	0.0708779	0.0890486	-0.12969	0.402749		-	-	-	-	-	-	-	-	-	-	-	-	-	-	-	-	-	-	4.33634	5.73677e-12	yes
644	324.073	6833.62	no	no	no	yes	Pancratistatin	C08535	no	no	-	1	C08535	C14H15NO8	0.0562906	0.531527	0.130556	0.0283598	0.105476	0.0182986	-0.311459	0.000150116	F5;hive	-	-	-	-	-	-	-	-	1.305	0.0197831	-	-	-	-	-1.75202	0.000340771	-	-	2.76859	2.59461e-13	no
645	324.219	13994.5	no	no	no	no	Bisoprolol	C06852	no	no	Ethers	4	C06852; C11845; C13800; C13958	C18H31NO4	1.95582	0.0304019	1.75377	0.0131847	1.81955	0.000430525	4.00939	0.0124296	hive	-	-	-	-	-	-	-	-	-	-	-	-	-	-	3.53995	1.53e-11	-	-	3.07381	1.76172e-08	no
646	325.114	28508.2	yes	substrate	no	yes	2-O-alpha-L-Rhamnopyranosyl-D-glucopyranose	C08244	yes	no	Disaccharides	6	C08244; C08246; C08247; C19635; C19758; C20354	C12H22O10	-0.533951	8.00841e-05	-0.290969	0.00988612	-0.381493	5.59003e-06	-0.558074	0.000161532	hive	-	-	-	-	-	-	-	-	-	-	-	-	-	-	-1.45473	0.0356552	-	-	3.47778	5.91751e-14	yes
647	325.129	67220.2	no	no	no	yes	Hinokitiol glucoside	C15451	yes	no	-	1	C15451	C16H22O7	0.226966	0.107035	0.0453417	0.684668	0.107993	0.192297	1.58767	0.00479525	hive	-	-	-	-	-	-	-	-	-	-	-	-	-	-	3.43813	1.53e-11	-	-	2.68478	1.51943e-12	yes
648	325.202	643411	yes	product	yes	yes	2,3-Dinor-8-iso prostaglandin F2alpha	C14794	no	no	Eicosanoids	1	C14794	C18H30O5	2.40882	8.39807e-05	2.71287	7.12834e-07	2.5687	2.22299e-11	2.86207	9.87037e-05	B;CL;F4;hive	-	-	2.54778	1.53221e-11	1.97764	1.53221e-11	0.644277	0.00135305	-	-	-	-	-	-	2.23188	1.53221e-11	-	-	3.72546	3.543e-07	no
649	327.093	35139.8	yes	substrate	no	yes	7-Hydroxy-6-methyl-8-ribityl lumazine	C05995	no	no	Pteridines and Derivatives	1	C05995	C12H16N4O7	-0.489144	0.00450793	-0.408372	0.00800422	-0.45487	9.29362e-05	-1.30548	7.07372e-06	A1;hive	2.6026	1.39431e-09	-	-	-	-	-	-	-	-	-	-	-	-	-1.25342	0.00916088	-	-	4.87603	7.83408e-13	no
650	327.109	29989.5	yes	substrate	no	yes	Anisatin	C09294	yes	no	-	2	C09294; C10717	C15H20O8	-3.20202	0.000204379	-1.5737	0.00138823	-2.46005	9.38728e-05	-1.97451	0.000567637	A1;B;CL;F4;F5;Fp;hive	1.01623	0.0144226	-0.95563	0.0274845	-0.960514	0.00076385	1.69478	2.06264e-06	-1.00765	0.0158352	-0.851512	0.0119424	-	-	-1.07838	0.00718312	-	-	4.03672	1.71547e-12	yes
651	327.128	21229.9	yes	substrate	no	no	Pencycuron	C11012	no	no	-	1	C11012	C19H21ClN2O	-0.996786	1.26736e-05	-0.635705	2.24218e-05	-0.801271	1.36732e-07	-0.374952	0.101742	CL;F5;hive	-	-	-	-	-1.66739	8.01576e-08	-	-	-1.56164	0.000196004	-	-	-	-	-1.07083	0.033154	-	-	4.52749	1.36881e-13	no
652	327.147	18591	no	no	no	no	1,2-Dehydroreticuline	C06167	yes	no	-	1	C06167	C19H22NO4	0.0593334	0.403371	0.189354	0.039268	0.120711	0.13274	0.0152826	0.886934	F4;S	-	-	-	-	-	-	-1.61789	0.00347817	-	-	-	-	-	-	-	-	1.38025	0.00213582	2.39718	3.6652e-10	yes
653	327.163	36121.5	no	no	no	no	Steryl sulfate	C02195	yes	no	-	1	C02195	C17H28O4S	0.249525	0.0138986	0.224904	0.0700483	0.225007	0.00888899	0.038319	0.748172	F4;S	-	-	-	-	-	-	-1.69534	0.00118199	-	-	-	-	-	-	-	-	1.28443	0.00396625	2.22746	5.90731e-08	yes
654	327.218	2.49662e+06	yes	product	no	yes	2,3-Dinor-8-iso prostaglandin F1alpha	C14795	no	no	Eicosanoids	1	C14795	C18H32O5	0.387968	0.00450567	0.34536	0.0072005	0.344897	0.0015049	0.400758	0.00494307	B;CL;F4;hive;S	-	-	1.6761	0.000147257	0.954401	0.0111906	-1.60625	0.000317197	-	-	-	-	-	-	1.12989	0.033624	1.25579	0.00076663	5.69706	2.57403e-07	no
655	328.046	45624.4	no	no	no	yes	Mecarbam	C00575	yes	no	Carboxylic Acids and Derivatives	4	C00575; C02353; C02507; C18661	C10H12N5O6P; C10H20NO5PS2	0.147853	0.754968	-0.557289	0.185533	-0.301915	0.302429	-1.26751	0.00894716		-	-	-	-	-	-	-	-	-	-	-	-	-	-	-	-	-	-	6.74182	2.32729e-05	yes
656	328.14	10076	no	no	no	no	Cypendazole	C18917	no	no	-	1	C18917	C16H19N5O3	0.0572406	0.620703	0.25406	0.00685732	0.161838	0.0454577	-0.212607	0.0811485		-	-	-	-	-	-	-	-	-	-	-	-	-	-	-	-	-	-	3.18142	4.64104e-10	no
657	328.177	24548.8	no	no	no	yes	Europine	C10301	no	no	Alkaloids	1	C10301	C16H27NO6	-0.202206	0.0378601	-0.133859	0.24707	-0.170325	0.0382662	-0.445503	0.00558744	B;F4;hive;S	-	-	1.26083	0.000350417	-	-	-2.38425	3.08472e-11	-	-	-	-	-	-	-1.01633	0.00824189	1.17753	3.24763e-05	2.68837	8.99744e-08	no
658	329.067	21601.6	yes	substrate	no	yes	3,7-Di-O-methylquercetin	C01265	yes	no	Flavonoids	8	C01265; C03036; C03040; C10033; C10193; C10424; C16754; C17670	C17H14O7	-0.672378	0.00138125	-0.335064	0.00474038	-0.5514	0.00804329	-0.600066	0.000755209	B;CL;F5;Fp;hive	-	-	1.11143	0.0202045	-0.850546	0.0189756	-	-	1.42206	0.000787216	-1.09959	0.00208082	-	-	-1.39647	0.00104959	-	-	2.67397	1.36406e-08	yes
659	329.161	15456.8	no	no	no	yes	8-Epiiridodial glucoside	C11656	no	no	-	7	C11656; C11670; C17055; C17634; C17635; C17636; C17637	C16H26O7	-0.134644	0.275917	0.0575531	0.538572	-0.0286539	0.725175	-0.524703	0.00443306	F4;G;hive;S	-	-	-	-	-	-	-1.42909	0.00214153	-	-	-	-	1.22206	0.0155599	-1.40647	0.00268909	1.11615	0.00449337	2.11509	4.20236e-10	no
660	329.233	1.71352e+06	no	no	no	yes	9,12,13-TriHOME	C14833	no	no	Fatty Acids and Conjugates	3	C14833; C14835; C14837	C18H34O5	-0.646236	0.00763282	-0.299617	0.0321137	-0.45582	0.000856424	-2.15913	2.57375e-08	A1;B;F4;G;hive	-1.14639	0.00172571	-1.59114	3.27447e-06	-	-	-1.08904	0.00357672	-	-	-	-	0.923707	0.0249054	-2.24296	1.70607e-10	-	-	5.54727	4.76769e-06	no
661	330.061	12792.3	no	no	no	no	dAMP	C00360	yes	no	Purine Nucleotides	1	C00360	C10H14N5O6P	0.0353257	0.759986	0.209074	0.0155554	0.136649	0.0379137	1.07055	0.0223771	hive	-	-	-	-	-	-	-	-	-	-	-	-	-	-	3.19681	1.54e-11	-	-	3.39947	8.66425e-08	yes
662	331.067	11798.9	no	no	no	no	1-O-Galloyl-beta-D-glucose	C01158	yes	no	-	1	C01158	C13H16O10	-0.60018	2.19874e-05	-1.50123	0.156354	-1.23049	0.0891796	-1.83505	0.107365		-	-	-	-	-	-	-	-	-	-	-	-	-	-	-	-	-	-	3.28115	2.72461e-17	yes
663	331.125	22377.3	no	no	no	yes	Zanamivir	C08095	no	no	Sugar Acids and Derivatives	1	C08095	C12H20N4O7	-0.480125	0.033407	-0.308335	0.00183936	-0.367565	0.000112943	-1.23013	0.00124255	F4;hive	-	-	-	-	-	-	-1.39902	0.00393112	-	-	-	-	-	-	-2.49817	1.87181e-08	-	-	3.5356	6.7407e-13	no
664	331.176	13500.6	no	no	no	no	(2S,3S)-2-Hydroxytridecane-1,2,3-tricarboxylate	C04655	no	no	-	1	C04655	C16H28O7	0.00351143	0.952935	0.212961	0.00372609	0.117402	0.0629187	0.708682	0.0560374	F4;G;hive	-	-	-	-	-	-	-1.15722	0.0134318	-	-	-	-	1.94832	1.39751e-06	2.40527	3.82963e-09	-	-	2.15394	7.57276e-11	no
665	331.214	32449.1	no	no	no	yes	Ipratropium	C07052	no	no	Phenylacetic Acid Derivatives	1	C07052	C20H30NO3	-0.466032	0.00608753	-0.0438393	0.670472	-0.222735	0.0255062	-0.738559	9.46472e-05	F4;F5;G;hive	-	-	-	-	-	-	-1.16126	0.0216561	1.14482	0.025046	-	-	1.90653	7.26688e-06	-1.58991	0.000281427	-	-	2.58295	2.17422e-07	no
666	331.249	626307	yes	substrate	yes	yes	9,10,18-Trihydroxystearate	C19621	no	no	Fatty Acids and Conjugates	1	C19621	C18H36O5	-3.72267	3.27819e-06	-2.78405	1.34106e-08	-3.13215	1.9123e-12	-4.37762	2.88863e-08	B;CL;F4;F5;G;hive	-	-	-1.84905	1.63559e-11	-1.65109	1.53567e-11	-1.36227	3.00502e-08	0.85969	0.000863915	-	-	1.02745	3.33298e-05	-1.83859	1.65915e-11	-	-	4.21483	0.000213363	no
667	332.012	3876.82	yes	substrate	no	yes	Glucocapparin	C08404	no	no	Monosaccharides	1	C08404	C8H15NO9S2	-0.323306	0.00406567	-0.234536	0.00171736	-0.267458	1.74406e-06	-0.587399	1.0161e-06	B;CL;F4;G;hive	-	-	-1.24618	0.00234882	-1.04871	0.000489182	-1.53912	6.54144e-05	-	-	-	-	1.10589	0.0110085	-2.33769	1.29625e-09	-	-	1.85147	1.73676e-12	no
668	332.189	8163.86	no	no	no	yes	alpha-Eucaine	C14166	no	no	-	1	C14166	C19H27NO4	-0.430776	5.59717e-05	-0.126327	0.0960408	-0.248227	0.000295482	-0.524125	5.02171e-05	G;hive	-	-	-	-	-	-	-	-	-	-	-	-	2.22897	2.36148e-07	-1.51794	0.000829304	-	-	2.7386	2.39401e-09	no
669	333.027	9401.8	yes	substrate	no	yes	5-(3,4-Diacetoxybut-1-ynyl)-2,2'-bithiophene	C04606	no	no	-	1	C04606	C16H14O4S2	-0.261176	0.00194069	-0.311027	0.000382915	-0.294982	3.97291e-07	-0.460676	2.18173e-05	B;CL;F4;hive	-	-	-1.36852	0.00282814	-1.45987	5.7415e-06	-1.75039	4.21934e-05	-	-	-	-	-	-	-2.05774	1.07164e-06	-	-	3.55329	1.81695e-13	no
670	333.059	77150.6	no	no	no	yes	sn-Glycero-3-phospho-1-inositol	C01225	yes	no	Cyclic Alcohols and Derivatives	4	C01225; C04641; C04703; C10517	C9H19O11P	0.0408267	0.810222	-0.117333	0.264441	-0.0632691	0.441036	-0.501621	0.00431094	Fp;hive;S	-	-	-	-	-	-	-	-	-	-	-1.14102	0.0179363	-	-	-1.37426	0.0194365	1.22937	0.00761838	6.61347	1.6345e-14	yes
671	333.094	28412.5	yes	substrate	no	yes	Aramite	C19019	no	no	-	1	C19019	C15H23ClO4S	-1.88232	3.52362e-05	-1.51437	0.000138075	-1.7122	2.58721e-07	-2.66587	1.86833e-05	CL;F5;G;hive	-	-	-	-	-1.16231	2.59744e-06	-	-	-1.24175	0.000202955	-	-	2.14496	1.43453e-10	-1.50651	3.63317e-06	-	-	4.90265	1.3185e-06	no
672	334.127	15940	no	no	no	yes	N4-(Acetyl-beta-D-glucosaminyl)asparagine	C04540	yes	no	Amino Acids and Derivatives	1	C04540	C12H21N3O8	0.158486	0.237466	0.0771829	0.493896	0.100465	0.225716	-0.536529	0.00162645	F4;G;hive	-	-	-	-	-	-	-1.50012	0.00826416	-	-	-	-	1.5142	0.00737162	-1.69113	0.00164072	-	-	4.41071	1.34224e-12	yes
673	335.295	3746.58	yes	substrate	no	yes	13,16-Docosadienoic acid	C16533	no	no	-	1	C16533	C22H40O2	-2.12977	0.00222532	-0.954277	0.00367503	-1.39606	1.2066e-05	-1.84723	9.54557e-05	S	-	-	-	-	-	-	-	-	-	-	-	-	-	-	-	-	1.51148	2.85e-05	1.92443	1.56089e-07	no
674	336.059	21541.3	no	no	no	no	5-Hydroxymethyldeoxycytidylate	C03997	no	no	-	1	C03997	C10H16N3O8P	-0.997425	0.0736563	-0.218733	0.620335	-0.441776	0.172681	-0.94188	0.0316635		-	-	-	-	-	-	-	-	-	-	-	-	-	-	-	-	-	-	-0.574093	0.000273757	yes
675	337.055	25452.6	no	no	no	no	1-(5'-Phosphoribosyl)-5-amino-4-imidazolecarboxamide	C04677	yes	no	Imidazole Nucleosides and Nucleotides	1	C04677	C9H15N4O8P	0.0325553	0.797848	0.147027	0.120682	0.111582	0.118327	-0.114932	0.181697		-	-	-	-	-	-	-	-	-	-	-	-	-	-	-	-	-	-	3.5707	1.08696e-11	yes
676	337.078	83678.5	no	no	no	yes	L-Ascorbic acid-2-glucoside	C18339	yes	no	-	1	C18339	C12H18O11	0.243861	0.382789	0.10196	0.529033	0.158758	0.236257	-2.07685	7.67242e-08	B;F4;G;hive	-	-	-1.82113	1.56314e-06	-	-	-1.07893	0.014535	-	-	-	-	-1.73646	4.88444e-06	-2.31715	1.70676e-09	-	-	3.4994	1.39407e-13	yes
677	337.094	19707.1	yes	product	no	no	1-Caffeoyl-4-deoxyquinic acid	C10432	no	no	-	3	C10432; C10441; C12208	C16H18O8	0.660759	0.00326511	0.917778	5.50538e-08	0.876457	1.73635e-06	0.667565	0.178373	CL;F4;hive	-	-	-	-	1.67874	3.24922e-07	1.98301	4.64929e-06	-	-	-	-	-	-	1.11083	0.0404437	-	-	3.91403	6.09336e-07	no
678	337.165	13128.3	no	no	no	yes	Pinolidoxin	C08503	no	no	-	2	C08503; C14538	C18H26O6	0.0910532	0.322826	0.492672	0.000103681	0.374187	0.000333851	-0.372332	0.00639898	B;CL;Fp	-	-	2.09208	2.73865e-08	1.60673	2.06993e-08	-	-	-	-	0.898288	0.0113599	-	-	-	-	-	-	2.59789	4.02735e-11	no
679	337.238	17062.6	no	no	no	yes	Aphidicolin	C06088	no	no	-	6	C06088; C09205; C14772; C14773; C14774; C14775	C20H34O4	-0.418367	0.0166438	0.0633031	0.684497	-0.132355	0.267466	-0.434197	0.0053412	A1	1.33454	0.0487948	-	-	-	-	-	-	-	-	-	-	-	-	-	-	-	-	3.26521	1.9688e-09	no
680	337.311	34938.9	no	no	no	yes	Erucic acid	C08316	yes	no	Fatty Acids and Conjugates	1	C08316	C22H42O2	-3.02005	0.000736333	-1.09121	0.0128058	-1.6902	7.68338e-06	-3.3493	2.56336e-05	S	-	-	-	-	-	-	-	-	-	-	-	-	-	-	-	-	2.34549	1.55e-11	3.13647	3.39386e-05	yes
681	338.173	13793.6	no	no	no	no	Xamoterol	C11775	no	no	-	1	C11775	C16H25N3O5	0.0865019	0.697648	0.321229	0.138459	0.233116	0.11652	0.222919	0.456491		-	-	-	-	-	-	-	-	-	-	-	-	-	-	-	-	-	-	2.97301	1.45687e-09	no
682	338.989	25447	no	no	no	no	D-Fructose 1,6-bisphosphate	C00354	yes	no	Monosaccharides	10	C00354; C00665; C01220; C01231; C03693; C03785; C04062; C04063; C04064; C05378	C6H14O12P2	0.504822	0.10537	0.0327788	0.890575	0.192228	0.296232	0.623144	0.102074		-	-	-	-	-	-	-	-	-	-	-	-	-	-	-	-	-	-	4.14857	2.99619e-07	yes
683	339.056	9714.08	no	no	no	no	Pyridafenthion	C18762	no	no	-	1	C18762	C14H17N2O4PS	-0.136199	0.0227278	0.00434477	0.945923	-0.0420082	0.35633	-0.344676	0.0873216	F4;hive	-	-	-	-	-	-	-1.35348	0.0305523	-	-	-	-	-	-	-1.67769	0.00237518	-	-	2.27397	7.83399e-09	no
684	339.092	18202.3	no	no	no	yes	Cellobiono-1,5-lactone	C01093	yes	no	-	3	C01093; C05403; C05731	C12H20O11	0.0887912	0.39989	0.166497	0.0412722	0.139711	0.0174632	-0.589433	4.90015e-05	A1;hive	1.41765	0.00817961	-	-	-	-	-	-	-	-	-	-	-	-	-2.02084	2.40482e-05	-	-	4.94838	9.48467e-14	yes
685	339.129	9425.49	no	no	no	no	Methyl-2-alpha-L-fucopyranosyl-beta-D-galactoside	C04698	no	no	-	1	C04698	C13H24O10	0.0211714	0.713292	0.298725	3.52375e-05	0.199819	6.67434e-05	0.243825	0.265082	CL	-	-	-	-	1.55537	0.000147676	-	-	-	-	-	-	-	-	-	-	-	-	2.94244	6.7407e-13	no
686	339.218	12998.4	yes	product	no	no	3alpha-Hydroxy-3,5-dihydromonacolin L acid	C20852	no	no	-	1	C20852	C19H32O5	0.47543	0.00360753	0.592407	0.000120114	0.545095	3.89226e-07	0.694063	0.0158386	B;CL;hive	-	-	1.62616	0.000906674	1.77021	5.41413e-07	-	-	-	-	-	-	-	-	2.15396	3.66436e-06	-	-	1.48769	2.10936e-08	no
687	339.327	168912	yes	substrate	yes	yes	Docosanoic acid	C08281	yes	no	Fatty Acids and Conjugates	1	C08281	C22H44O2	-3.49787	0.000435536	-2.34177	2.84841e-05	-2.71761	7.0766e-09	-2.29179	4.16133e-05	CL;F4;F5;G;hive	-	-	-	-	-1.42653	6.26319e-06	-1.33149	0.00316547	-1.45396	0.000856349	-	-	1.16794	0.0159422	-1.41417	0.00131998	-	-	2.28304	8.31714e-07	yes
688	340.047	14918.5	yes	substrate	no	yes	Aristolochic acid	C08469	yes	no	Alkaloids	1	C08469	C17H11NO7	-1.28701	3.00484e-07	-1.32392	2.54503e-06	-1.31017	4.41452e-12	-2.02872	8.61417e-07	CL;F5;hive	-	-	-	-	-1.75684	1.13279e-10	-	-	-1.58741	5.01935e-06	-	-	-	-	-2.20845	4.64258e-10	-	-	4.24822	2.58116e-11	yes
689	341.089	867259	no	no	no	no	Caffeic acid 3-glucoside	C10431	no	no	-	2	C10431; C10433	C15H18O9	-0.388222	0.0159324	-0.213982	0.141988	-0.285431	0.00456706	-0.205564	0.260419		-	-	-	-	-	-	-	-	-	-	-	-	-	-	-	-	-	-	-0.446266	0.2998	yes
690	341.11	1.39345e+07	no	no	no	no	Sucrose	C00089	no	no	Disaccharides	35	C00089; C00185; C00208; C00243; C00252; C00897; C01083; C01235; C01518; C01711; C01725; C01728; C01742; C01970; C01971; C02048; C02964; C03857; C04147; C04219; C05400; C05402; C06421; C06422; C07064; C08240; C08250; C15548; C18068; C19632; C19633; C19634; C19636; C19773; C20236	C12H22O11	0.196402	0.44744	-0.107526	0.68429	0.000917591	0.995432	-0.212068	0.459427		-	-	-	-	-	-	-	-	-	-	-	-	-	-	-	-	-	-	-1.42324	0.0358755	yes
691	343.065	23419	yes	substrate	no	yes	Bluensidine 6-phosphate	C17572	yes	no	-	1	C17572	C8H17N4O9P	-0.667471	1.26736e-05	-0.502013	3.37337e-05	-0.564345	5.26638e-10	-0.791807	2.48738e-06	CL;Fp;G;hive	-	-	-	-	-1.41925	2.83037e-07	-	-	-	-	-1.47985	7.64913e-07	-1.42358	0.000129338	-2.03983	2.31567e-08	-	-	3.54535	2.82817e-17	yes
692	343.167	28675.8	yes	product	no	yes	Formoterol	C07805	yes	no	Phenethylamines	1	C07805	C19H24N2O4	1.13417	2.75479e-05	1.05685	1.68831e-06	1.07119	4.64554e-09	0.681068	0.000370957	B;CL;G;hive;S	-	-	3.01846	1.53221e-11	1.99854	1.53243e-11	-	-	-	-	-	-	0.674216	0.0302064	1.11606	1.27071e-05	0.636238	0.00674318	2.88644	6.54434e-14	yes
693	344.04	34309.6	yes	product	no	yes	3',5'-Cyclic GMP	C00942	yes	no	Purine Nucleotides	4	C00942; C06194; C07025; C18344	C10H12N5O7P; C10H12N5O7P.	0.715491	0.0031837	0.736451	6.55469e-07	0.713413	2.46771e-08	1.33293	0.00269162	CL;G;hive	-	-	-	-	1.28476	1.53037e-07	-	-	-	-	-	-	2.06863	3.27877e-10	2.93021	1.53438e-11	-	-	7.21902	4.85091e-06	yes
694	344.117	85705.7	no	no	no	yes	Rhodamine 123	C11190	no	no	-	1	C11190	C21H17N2O3.	-0.0467773	0.525078	-0.15574	0.0175095	-0.118013	0.0100146	-0.679952	1.0019e-07	hive	-	-	-	-	-	-	-	-	-	-	-	-	-	-	-2.68566	1.36e-10	-	-	1.27322	0.000108795	yes
695	345.062	15862.4	yes	substrate	no	yes	Tomentin	C04581	yes	no	Flavonoids	7	C04581; C09967; C10021; C11620; C17788; C19588; C19589	C17H14O8	-0.719547	1.28995e-05	-0.421934	0.00187331	-0.523326	1.66923e-07	-0.805464	1.94401e-05	A1;B;CL;hive;S	1.79652	4.23889e-07	1.01915	0.0133009	-0.850302	0.00428673	-	-	-	-	-	-	-	-	-1.43459	7.24518e-05	0.828397	0.0154857	3.20505	2.88908e-13	yes
696	345.119	20679.5	no	no	no	no	Aucubin	C09771	yes	no	Prenol Lipids	2	C09771; C11671	C15H22O9	0.268848	0.113602	0.827185	0.00643377	0.65124	0.00202136	0.380206	0.0711959	CL	-	-	-	-	1.67384	0.000103654	-	-	-	-	-	-	-	-	-	-	-	-	2.68019	1.4914e-15	yes
697	345.167	20895.8	no	no	no	yes	Spenolimycin	C17970	yes	no	-	1	C17970	C15H26N2O7	-0.146296	0.0752208	0.0363382	0.767193	-0.042165	0.612513	-0.664034	0.000571369	F4;F5;G;hive	-	-	-	-	-	-	-1.43792	0.00180527	1.78498	4.10491e-05	-	-	1.2538	0.0109401	-1.342	0.00472036	-	-	2.97869	4.78769e-09	yes
698	346.056	2.42237e+06	no	no	no	yes	AMP	C00020	no	no	Purine Nucleotides	6	C00020; C00362; C00946; C01367; C04378; C19970	C10H14N5O7P	-0.0456105	0.781782	0.136016	0.500056	0.0870618	0.540424	1.74539	0.00157092	hive	-	-	-	-	-	-	-	-	-	-	-	-	-	-	3.29701	1.53e-11	-	-	-0.506148	0.105663	yes
699	347.078	51560	no	no	no	no	1,2,3,4-Tetrahydro-alpha,7-dihydroxy-beta-(hydroxymethyl)-9-methoxy-3,4-dio...	C19591	no	no	-	2	C19591; C19592	C17H16O8	-0.192737	0.212823	0.0772426	0.641688	-0.00746	0.950456	-0.468726	0.0293526		-	-	-	-	-	-	-	-	-	-	-	-	-	-	-	-	-	-	2.4146	0.00412275	no
700	347.104	17455.9	no	no	no	yes	Camptothecin	C01897	no	no	Alkaloids	1	C01897	C20H16N2O4	-0.10138	0.142581	-0.0962599	0.316295	-0.100288	0.0985211	-0.552783	5.11434e-05	F4;hive	-	-	-	-	-	-	-1.66043	0.00121993	-	-	-	-	-	-	-1.9446	7.80458e-05	-	-	1.87114	7.13359e-12	no
701	347.172	61415.3	yes	substrate	no	yes	Schizonepetoside E	C17638	yes	no	-	1	C17638	C16H28O8	-1.02862	0.00107895	-1.22149	3.96431e-06	-1.15284	1.16835e-09	-1.0625	8.54853e-06	B;CL;F4;F5;Fp;hive	-	-	-2.01962	4.03605e-07	-1.99833	1.5388e-10	-2.36405	4.41301e-09	-1.64447	4.73652e-05	-0.982476	0.0081616	-	-	-1.82353	5.03658e-06	-	-	2.2246	1.67239e-12	yes
702	348.125	8745.05	no	no	no	no	2-(Biaryl)carbapenems	C12019	no	no	-	1	C12019	C21H19NO4	-0.0595596	0.639528	0.0739802	0.488605	0.0233466	0.755687	-0.204958	0.034345	F4;G	-	-	-	-	-	-	-1.78693	0.00145539	-	-	-	-	1.38343	0.0329408	-	-	-	-	3.76915	1.04408e-13	no
703	351.057	17008.1	no	no	no	no	4-(4-Deoxy-beta-D-gluc-4-enuronosyl)-D-galacturonate	C04733	yes	no	-	2	C04733; C06118	C12H16O12	0.782945	0.0898798	0.715582	0.0221822	0.737092	0.00190581	0.287514	0.550486	CL;G	-	-	-	-	0.654447	0.0427014	-	-	-	-	-	-	3.53113	1.53243e-11	-	-	-	-	3.72095	1.04417e-09	yes
704	351.095	13244.1	no	no	no	no	Hexythiazox	C18467	no	no	-	1	C18467	C17H21ClN2O2S	0.0701889	0.377209	0.179408	0.0146214	0.146025	0.00758589	-0.170476	0.12702	CL	-	-	-	-	1.14545	0.0160449	-	-	-	-	-	-	-	-	-	-	-	-	2.92533	5.9677e-13	no
705	351.111	11862.5	no	no	no	no	Berberastine	C09360	no	no	Alkaloids	1	C09360	C20H18NO5	0.246784	0.0473905	0.746312	4.5247e-06	0.624473	8.06619e-05	0.293831	0.445746	CL;F5	-	-	-	-	2.1327	1.04024e-10	-	-	1.41979	0.00155455	-	-	-	-	-	-	-	-	3.0025	6.8149e-10	no
706	351.218	27188	no	no	no	no	Prostaglandin H2	C00427	no	no	Eicosanoids	17	C00427; C00584; C00696; C01312; C02198; C04654; C04671; C04853; C05960; C06314; C06315; C06476; C11997; C13807; C13808; C17652; C17656	C20H32O5	0.154998	0.128068	0.257494	0.0266589	0.218185	0.00477191	-0.284006	0.0446652	CL	-	-	-	-	1.06683	0.0167676	-	-	-	-	-	-	-	-	-	-	-	-	0.495029	5.38559e-07	yes
707	352.066	7882.98	no	no	no	no	2,5-Diamino-6-(5-phospho-D-ribosylamino)pyrimidin-4(3H)-one	C01304	no	no	-	1	C01304	C9H16N5O8P	0.0763284	0.423925	0.142224	0.0707763	0.120128	0.0313903	-0.189523	0.140615	G	-	-	-	-	-	-	-	-	-	-	-	-	2.88011	3.38e-10	-	-	-	-	3.72704	1.38129e-14	no
708	353.044	8486.91	no	no	no	yes	Thiodicarb	C18423	no	no	-	1	C18423	C10H18N4O4S3	-0.458205	0.000109981	-0.0595482	0.464759	-0.208699	0.0023434	-0.357315	0.00166545	B;F4;F5;Fp;hive;S	-	-	1.12446	0.0142438	-	-	1.12481	0.0141933	1.75102	9.92744e-06	-0.881519	0.0241929	-	-	-1.01086	0.0416199	0.858288	0.0314846	2.85934	6.0871e-13	no
709	353.233	40799.2	yes	product	no	yes	Prostaglandin F2alpha	C00639	no	no	Eicosanoids	12	C00639; C02314; C04741; C04843; C05959; C06438; C12786; C13809; C14782; C14809; C14811; C14814	C20H34O5; C20H34O5.	0.797498	0.000542565	1.00769	2.955e-05	0.913248	1.30016e-08	1.18125	0.00108428	B;CL;hive	-	-	1.88048	3.70677e-09	1.93197	1.54646e-11	-	-	-	-	-	-	-	-	2.42334	1.58878e-11	-	-	2.76636	1.54694e-08	no
710	353.307	2634.55	yes	substrate	no	yes	22-Oxo-docosanoate	C19624	no	no	-	1	C19624	C22H42O3	-1.53396	0.0044345	-0.959544	0.000163533	-1.18527	2.59309e-06	-1.10927	9.74436e-05	CL;F5;G;hive	-	-	-	-	-1.03428	0.00813961	-	-	-1.22952	0.0248517	-	-	1.2749	0.0170258	-1.14221	0.049545	-	-	0.442339	4.87851e-06	no
711	355.25	53514.1	yes	product	no	yes	Prostaglandin F1alpha	C06475	no	no	Eicosanoids	1	C06475	C20H36O5	0.81391	0.000371642	1.21474	5.76415e-05	1.03712	4.71314e-08	0.97731	9.91826e-05	B;CL;hive	-	-	1.98056	2.20639e-08	2.16351	1.54555e-11	-	-	-	-	-	-	-	-	1.58667	7.15711e-06	-	-	2.83209	1.49515e-06	no
712	355.322	55426.6	yes	substrate	no	no	13-Hydroxydocosanoic acid	C03049	no	no	-	2	C03049; C19623	C22H44O3	-3.17617	0.000128597	-1.78373	4.84427e-05	-2.22792	3.44685e-09	-0.358623	0.404582	A1;CL;F4;F5	1.10429	0.0281901	-	-	-1.27008	7.22198e-05	-1.27938	0.0053189	-1.26871	0.00592186	-	-	-	-	-	-	-	-	2.29396	4.90715e-06	no
713	356.022	8148	yes	substrate	no	yes	Chlorsulfuron	C05071	no	no	-	1	C05071	C12H12ClN5O4S	-0.718953	4.91352e-07	-0.699336	2.64413e-06	-0.706946	6.15459e-12	-1.00402	1.12106e-07	CL;F5;hive	-	-	-	-	-1.47905	6.01053e-09	-	-	-1.49851	6.46007e-06	-	-	-	-	-1.93048	7.47602e-09	-	-	2.25865	1.60677e-15	no
714	356.136	9056.07	yes	substrate	no	yes	Bakankoside	C09914	no	no	-	1	C09914	C16H23NO8	-0.765859	0.00106881	-0.886016	0.00041081	-0.842733	6.53052e-07	-1.06284	0.000125833	B;CL;F4;F5;Fp;hive	-	-	-1.77768	0.000308355	-1.70166	2.66461e-06	-1.60828	0.00156534	-1.96458	4.68453e-05	-1.56781	8.82719e-05	-	-	-1.93311	6.46961e-05	-	-	3.73817	3.95463e-11	no
715	356.171	13662.8	no	no	no	no	Uplandicine	C10412	yes	no	Alkaloids	1	C10412	C17H27NO7	-0.0373616	0.685469	0.119249	0.155654	0.0583347	0.323939	0.624462	0.0336542	hive	-	-	-	-	-	-	-	-	-	-	-	-	-	-	2.86451	2.62e-08	-	-	3.4353	9.87433e-11	yes
716	357.078	23554.8	no	no	no	yes	Miraxanthin-I	C08554	no	no	-	1	C08554	C14H18N2O7S	-0.27386	0.0143	-0.0771869	0.635852	-0.141517	0.1872	-0.488947	0.00406481	hive	-	-	-	-	-	-	-	-	-	-	-	-	-	-	-1.53295	0.0352226	-	-	4.36656	2.41045e-12	no
717	357.089	31992.9	no	no	no	no	Pantetheine 4'-phosphate	C01134	yes	no	Organic Phosphoric Acids and Derivatives	1	C01134	C11H23N2O7PS	-0.307802	0.000578113	-0.466798	0.0131847	-0.409205	0.000451468	-0.569397	0.0157826	B;CL;hive	-	-	-1.45589	0.0323126	-1.33318	0.00386731	-	-	-	-	-	-	-	-	-1.57273	0.014576	-	-	5.82028	1.53899e-12	yes
718	358.108	26984.6	yes	substrate	no	yes	Isopenicillin N	C05557	yes	no	-	3	C05557; C06564; C10584	C14H21N3O6S; C22H17NO4	-0.452571	0.000230951	-0.787625	0.00789524	-0.668315	0.000274029	-1.01247	0.00517177	B;CL;hive	-	-	-1.36598	0.0448251	-1.49875	0.00042423	-	-	-	-	-	-	-	-	-1.79657	0.00183127	-	-	7.28787	3.42593e-11	yes
719	358.125	13064.1	no	no	no	yes	Rabeprazole	C07864	no	no	Benzimidazoles	1	C07864	C18H21N3O3S	-0.0760986	0.311233	-0.12211	0.132604	-0.108842	0.0427505	-0.874692	1.00321e-06	F4;F5;hive	-	-	-	-	-	-	-1.09562	0.0136605	-1.30171	0.00142386	-	-	-	-	-2.93591	1.5932e-11	-	-	5.44513	6.35367e-13	no
720	358.143	6747.15	no	no	no	yes	Capecitabine	C12650	no	no	Diazines	1	C12650	C15H22FN3O6	-0.127327	0.176385	-0.0301825	0.619407	-0.0747278	0.153927	-0.445241	2.26026e-05	F4;G;hive	-	-	-	-	-	-	-1.00195	0.0459859	-	-	-	-	1.96447	6.65276e-07	-1.89273	1.693e-06	-	-	3.51966	3.55776e-13	no
721	358.225	16639.2	no	no	no	yes	Loxtidine	C11805	no	no	-	1	C11805	C19H29N5O2	-0.165346	0.167007	-0.112532	0.428388	-0.139179	0.146359	0.689014	0.0042291	F4;hive	-	-	-	-	-	-	-2.03515	4.07363e-07	-	-	-	-	-	-	2.16268	7.80664e-08	-	-	3.30473	1.08646e-06	no
722	359.076	13120.2	yes	substrate	no	yes	Nitrovin	C19487	yes	no	-	1	C19487	C14H12N6O6	-0.637104	0.000154006	-0.54612	0.00276182	-0.585061	2.28129e-06	-1.16195	3.23266e-05	B;CL;F5;Fp;hive	-	-	1.66471	3.84715e-05	-0.817053	0.0264224	-	-	1.23364	0.00546414	-1.00142	0.00661007	-	-	-1.43398	0.000603867	-	-	3.05891	2.85578e-10	yes
723	359.125	28724.6	no	no	no	no	Nitrendipine	C07713	yes	no	Hydropyridines	2	C07713; C17754	C18H20N2O6	0.0166245	0.88642	0.0285351	0.619407	0.0233966	0.62172	-0.285956	0.173677	hive	-	-	-	-	-	-	-	-	-	-	-	-	-	-	-1.68287	0.0311175	-	-	7.00842	2.33099e-09	yes
724	359.135	11508.7	no	no	no	no	7-Deoxyloganate	C11636	yes	no	-	2	C11636; C11649	C16H24O9	0.174734	0.0228536	0.16629	0.000838988	0.164349	6.65171e-05	0.296546	0.100686	CL;G;hive	-	-	-	-	0.966886	0.0287227	-	-	-	-	-	-	1.63325	0.00126876	1.80606	0.000239409	-	-	4.85398	1.24782e-11	yes
725	359.186	16552.2	no	no	no	no	Cortisone	C00762	yes	no	Steroids and Steroid Derivatives	6	C00762; C01780; C07369; C09846; C10723; C18039	C21H28O5	-0.135041	0.300388	-0.130831	0.345991	-0.135377	0.131487	-0.264303	0.207772		-	-	-	-	-	-	-	-	-	-	-	-	-	-	-	-	-	-	3.21069	4.6573e-07	yes
726	362.051	66299.3	no	no	no	yes	GMP	C00144	yes	no	Purine Nucleotides	4	C00144; C06193; C18239; C19968	C10H14N5O8P	0.640009	0.011762	0.685428	9.11048e-06	0.635251	0.000132757	1.84242	0.0017961	CL;G;hive	-	-	-	-	0.817735	1.97839e-05	-	-	-	-	-	-	1.54202	1.2553e-09	3.47719	1.53221e-11	-	-	2.66268	6.25838e-08	yes
727	363.035	21458.9	yes	substrate	no	yes	Xanthosine 5'-phosphate	C00655	no	no	Purine Nucleotides	1	C00655	C10H13N4O9P	-0.6462	1.54773e-06	-0.536187	0.000120114	-0.576253	3.60802e-09	-0.687252	2.51733e-05	A1;CL;G;hive	1.10518	0.0200257	-	-	-1.57258	2.38368e-07	-	-	-	-	-	-	-1.41838	0.000739301	-1.91989	1.59836e-06	-	-	1.45332	4.1683e-07	yes
728	365.068	11790.5	no	no	no	yes	Pachyrrhizone	C10512	no	no	Flavonoids	3	C10512; C12258; C12367	C20H14O7	-0.175273	0.0483394	-0.212114	0.00686516	-0.199034	0.000117859	-0.260856	0.00376411	CL;Fp;hive	-	-	-	-	-1.16296	0.00611272	-	-	-	-	-1.14836	0.0179988	-	-	-1.40689	0.0162472	-	-	2.68522	8.98063e-15	no
729	365.197	18137.3	no	no	no	no	20-COOH-Leukotriene B4	C05950	yes	no	Eicosanoids	3	C05950; C08758; C15438	C20H30O6	0.520697	4.20088e-07	0.0832845	0.882938	0.236886	0.48883	-0.429722	0.506088		-	-	-	-	-	-	-	-	-	-	-	-	-	-	-	-	-	-	3.01351	8.60462e-08	yes
730	365.343	28052.7	yes	substrate	no	yes	(15Z)-Tetracosenoic acid	C08323	yes	no	Fatty Acids and Conjugates	2	C08323; C15398	C24H46O2	-3.43009	0.000459981	-1.40667	0.00167371	-2.0574	9.35444e-07	-2.35882	6.98992e-05	S	-	-	-	-	-	-	-	-	-	-	-	-	-	-	-	-	1.94533	1.1e-09	2.16647	1.32659e-05	yes
731	365.98	6792.12	no	no	no	yes	Phosalone	C11028	no	no	-	1	C11028	C12H15ClNO4PS2	0.140193	0.0954893	0.134875	0.0965396	0.139062	0.0155193	-0.246574	0.00384015	F4	-	-	-	-	-	-	1.70718	0.0109081	-	-	-	-	-	-	-	-	-	-	1.52123	1.91544e-13	no
732	367.158	11216.8	no	no	no	yes	Dehydroepiandrosterone sulfate	C04555	yes	no	Steroids and Steroid Derivatives	1	C04555	C19H28O5S	-0.0623399	0.389923	0.075995	0.260502	0.0251042	0.597118	0.487069	0.00894716	F4;hive	-	-	-	-	-	-	-1.39265	0.00103999	-	-	-	-	-	-	2.47766	1.23655e-09	-	-	3.61937	1.5103e-08	yes
733	367.213	24547	no	no	no	no	Prostaglandin G2	C05956	no	no	Eicosanoids	6	C05956; C05962; C05964; C12202; C17653; C17655	C20H32O6	-0.0719635	0.429326	-0.947158	0.423521	-0.672494	0.380571	-1.10794	0.354214		-	-	-	-	-	-	-	-	-	-	-	-	-	-	-	-	-	-	2.77867	0.00111495	no
734	367.358	242917	yes	substrate	no	no	Lignoceric acid	C08320	no	synonym	Fatty Acids and Conjugates	1	C08320	C24H48O2	-3.29754	0.000107621	-1.93116	0.000126915	-2.40985	3.81052e-08	-1.2867	0.0279417	A1;CL;F4;F5;hive	1.61504	0.000153616	-	-	-1.32616	3.43987e-05	-1.2508	0.00765844	-1.3657	0.00238777	-	-	-	-	-1.06072	0.0436481	-	-	0.625724	0.00666535	yes
735	369.068	19192.1	no	no	no	yes	Digalacturonate	C02273	yes	no	Trisaccharides	2	C02273; C04354	C12H18O13	-1.00747	0.000542565	-0.375523	0.0350609	-0.619212	6.65171e-05	-0.92031	0.000233782	B;F5	-	-	1.79556	0.000125642	-	-	-	-	1.18717	0.0372472	-	-	-	-	-	-	-	-	3.68462	1.56171e-10	yes
736	369.229	45887.6	yes	product	no	no	6-Keto-prostaglandin F1alpha	C05961	no	no	Eicosanoids	2	C05961; C05963	C20H34O6	1.83058	0.00174103	1.62547	4.68867e-05	1.69274	1.77569e-07	2.49855	0.0123156	B;CL;hive	-	-	1.65886	9.38899e-08	1.39602	4.79146e-09	-	-	-	-	-	-	-	-	3.11358	1.53259e-11	-	-	2.18137	3.30992e-08	no
737	369.301	6011.89	yes	substrate	no	no	Di(2-ethylhexyl) adipate	C14240	no	no	Fatty Acid Esters	2	C14240; C19625	C22H42O4	-0.490003	0.00566893	-0.345417	0.00035576	-0.397861	1.7491e-06	-0.322433	0.0139678	CL;F4;F5	-	-	-	-	-1.1848	0.00832606	-1.51873	0.0112213	-1.61577	0.00525413	-	-	-	-	-	-	-	-	-0.475596	6.25494e-09	no
738	371.063	11369.7	yes	substrate	no	yes	2-O-Caffeoylglucarate	C03062	no	no	-	1	C03062	C15H16O11	-0.598673	6.89408e-07	-0.745747	9.11579e-06	-0.697286	6.14971e-10	-0.650063	5.29823e-05	CL;F4	-	-	-	-	-1.0192	0.0170868	1.6991	0.000704164	-	-	-	-	-	-	-	-	-	-	3.94691	2.19173e-11	no
739	371.244	60267.7	no	no	no	yes	8,8a-Deoxyoleandolide	C11989	yes	no	-	1	C11989	C20H36O6	1.27413	0.0101019	1.28333	4.98314e-05	1.25842	1.32447e-06	0.970092	0.00109832	B;CL;hive	-	-	0.943914	0.0328559	2.31742	1.5378e-11	-	-	-	-	-	-	-	-	1.54974	1.83722e-05	-	-	3.25357	2.11712e-07	yes
740	372.144	8832.07	no	no	no	yes	1,2-O-Diacetylzephyranthine	C12171	no	no	-	1	C12171	C20H23NO6	0.00293305	0.974619	0.081996	0.295164	0.0567721	0.324562	-0.332532	2.13636e-05	F4;F5;G;hive	-	-	-	-	-	-	-1.93305	2.13642e-06	-1.07804	0.031039	-	-	1.39763	0.0012517	-1.36317	0.00182164	-	-	3.16135	1.6138e-09	no
741	373.151	37241.8	yes	substrate	no	yes	Deoxyloganin	C06071	yes	no	-	2	C06071; C11648	C17H26O9	-1.65166	1.26736e-05	-1.41073	0.00154407	-1.53933	9.54038e-07	-1.6965	0.000682738	CL;F5;G;hive	-	-	-	-	-1.24682	4.43437e-05	-	-	-1.30579	0.00224092	-	-	1.93363	1.04225e-06	-1.38189	0.000954409	-	-	4.02212	2.35138e-08	yes
742	375.085	7839.7	no	no	no	yes	Resistomycin	C12080	no	no	-	1	C12080	C22H16O6	-0.10937	0.230174	-0.0912648	0.300176	-0.0973831	0.0989471	-0.285777	0.00157753	hive	-	-	-	-	-	-	-	-	-	-	-	-	-	-	-1.47546	0.0345629	-	-	4.41233	8.76308e-11	no
743	375.131	10950.2	no	no	no	no	Riboflavin	C00255	yes	no	Pteridines and Derivatives	1	C00255	C17H20N4O6	0.0838943	0.13497	-0.0611632	0.33886	-0.00671283	0.890424	-0.0300711	0.818555		-	-	-	-	-	-	-	-	-	-	-	-	-	-	-	-	-	-	3.73229	1.46691e-11	yes
744	375.2	18333.9	no	no	no	no	17beta-Hydroxy-7alpha-mercaptoandrost-4-en-3-one 7-propionate	C14973	yes	no	-	1	C14973	C22H32O3S	-0.149797	0.0277257	0.248525	0.000382915	0.0890729	0.137622	-0.19889	0.0420793	B;CL;F4;G;S	-	-	1.30628	0.00198414	0.83016	0.0189108	-1.51296	0.00017792	-	-	-	-	2.05722	1.6655e-07	-	-	1.02637	0.00386712	2.117	2.09783e-09	yes
745	377.033	65852.4	no	no	no	yes	6-Methylthiopurine 5'-monophosphate ribonucleotide	C16615	yes	no	Carbohydrates and Carbohydrate Conjugates	1	C16615	C11H15N4O7PS	0.0212002	0.757367	-0.108853	0.130579	-0.0612998	0.218226	-0.355986	0.000330187	hive	-	-	-	-	-	-	-	-	-	-	-	-	-	-	-2.08757	0.000368298	-	-	3.97605	3.81502e-08	yes
746	378.027	13672.1	no	no	no	yes	6-Thioguanosine monophosphate	C16619	no	no	Carbohydrates and Carbohydrate Conjugates	1	C16619	C10H14N5O7PS	-0.233735	0.0127254	-0.103888	0.370187	-0.1476	0.051913	-0.246141	0.00340505	S	-	-	-	-	-	-	-	-	-	-	-	-	-	-	-	-	1.53439	0.000730714	3.27326	1.09675e-11	no
747	378.09	780989	no	no	no	no	Methicillin sodium	C13973	no	no	-	1	C13973	C17H19N2O6S.	0.141476	0.274238	-0.242352	0.0734269	-0.106082	0.282557	-0.462988	0.0267671		-	-	-	-	-	-	-	-	-	-	-	-	-	-	-	-	-	-	5.78542	9.07789e-07	no
748	379.014	23208.3	no	no	no	no	6-Thioxanthine 5'-monophosphate	C16618	no	no	Carbohydrates and Carbohydrate Conjugates	1	C16618	C10H13N4O8PS	0.0247744	0.82286	0.15598	0.0237856	0.113954	0.0395313	0.204747	0.0595619	S	-	-	-	-	-	-	-	-	-	-	-	-	-	-	-	-	2.04438	8.74e-07	2.34867	1.70194e-10	no
749	380.154	9853.64	no	no	no	no	Azelastine	C07768	no	no	-	1	C07768	C22H24ClN3O	-0.268125	0.0528897	-0.619	0.0156097	-0.493028	0.00154048	-0.468348	0.0506268		-	-	-	-	-	-	-	-	-	-	-	-	-	-	-	-	-	-	4.66824	7.65989e-07	no
750	381.021	7651.96	yes	substrate	no	yes	Ceftizoxime sodium	C08118	no	no	-	1	C08118	C13H12N5O5S2.	-0.647659	1.05208e-06	-0.410721	1.03916e-05	-0.500956	2.34829e-10	-0.468559	6.90463e-06	CL;F5;Fp;G;hive;S	-	-	-	-	-1.75537	1.36731e-09	-	-	-0.965458	0.0398889	-2.03603	1.5319e-10	-0.998019	0.0291649	-1.96482	1.62947e-07	-0.958639	0.00513933	1.65326	7.42904e-13	no
751	381.133	11019	no	no	no	yes	Licoricone	C17765	no	no	Flavonoids	1	C17765	C22H22O6	-0.11718	0.0548766	-0.100996	0.121466	-0.109258	0.0134756	-0.304136	0.000734382	A1;F5;hive	1.36479	0.00627763	-	-	-	-	-	-	-1.34995	0.00719694	-	-	-	-	-1.3945	0.00475858	-	-	3.20294	3.7315e-14	no
752	381.192	17167.7	no	no	no	no	Cinncassiol C3	C17641	yes	no	-	2	C17641; C17645	C20H30O7	-0.0394412	0.638702	-0.0827649	0.684497	-0.068305	0.576348	0.349087	0.062073	F4	-	-	-	-	-	-	-1.78111	0.00614426	-	-	-	-	-	-	-	-	-	-	2.60805	2.73591e-09	yes
753	381.207	9755.73	no	no	no	yes	Ammoresinol	C09056	no	no	-	1	C09056	C24H30O4	-0.179336	0.00326592	-0.0855593	0.35966	-0.12647	0.0380874	-0.543801	5.05905e-05	F4;G;hive	-	-	-	-	-	-	-1.21451	0.0328424	-	-	-	-	1.69707	0.00040915	-1.69922	0.000400417	-	-	1.3976	1.84033e-10	no
754	382.055	8588.77	yes	substrate	no	yes	Brinzolamide	C07760	no	no	-	1	C07760	C12H21N3O5S3	-0.555898	0.000831878	-0.528156	3.68342e-07	-0.53549	4.41452e-12	-0.946486	9.24576e-09	CL;F4;F5;Fp;G;hive	-	-	-	-	-2.00462	1.53672e-11	-1.05125	0.00109899	-1.42888	2.65297e-06	-0.917969	0.000427779	-0.947129	0.00487565	-3.14599	1.53245e-11	-	-	3.51582	2.77631e-08	no
755	382.136	16706.4	yes	substrate	no	yes	N-Acetyllactosamine	C00611	yes	no	Tetrasaccharides	4	C00611; C06372; C07278; C19784	C14H25NO11	-0.730401	3.27819e-06	-0.782779	2.11073e-07	-0.763057	1.92358e-13	-1.22452	7.94669e-09	CL;F5;hive;S	-	-	-	-	-1.97938	1.53223e-11	-	-	-2.24886	1.53303e-11	-	-	-	-	-2.70403	1.53221e-11	-0.835257	1.04281e-05	4.01814	3.99141e-08	yes
756	382.174	6802.38	no	no	no	no	Dihydrozeatin-O-glucoside	C16448	no	no	-	1	C16448	C16H25N5O6	0.285348	0.00377811	0.116153	0.0618097	0.171599	0.00903169	0.0818245	0.319311	F4;G	-	-	-	-	-	-	-1.56562	0.000694011	-	-	-	-	2.30967	1.54338e-07	-	-	-	-	2.92701	7.09966e-08	no
757	383.119	111590	yes	substrate	no	yes	Acetyl-maltose	C02130	yes	no	-	1	C02130	C14H24O12	-0.777982	3.12513e-06	-1.13548	7.42639e-07	-1.0103	4.60402e-09	-1.27485	3.10484e-06	B;CL;F4;F5;Fp;hive	-	-	-1.31888	0.000337163	-2.26401	1.53894e-11	-1.34331	0.000244007	-2.35499	1.24749e-10	-0.841403	0.0128864	-	-	-2.4382	4.76309e-11	-	-	5.60359	1.46691e-11	yes
758	383.198	31278.4	no	no	no	no	16-Methoxy-2,3-dihydro-3-hydroxytabersonine	C04578	yes	no	Alkaloids	3	C04578; C09236; C16980	C22H28N2O4	2.24341	0.0337921	2.46827	9.74115e-05	2.39122	2.09452e-06	0.0343036	0.884132	CL;F5	-	-	-	-	2.19105	1.70058e-11	-	-	1.31961	0.00133893	-	-	-	-	-	-	-	-	2.42735	2.90485e-05	yes
759	383.353	52035.8	yes	substrate	no	no	2-Hydroxytetracosanoic acid	C17873	no	no	Fatty Acids and Conjugates	1	C17873	C24H48O3	-3.1692	0.000214535	-1.79787	0.000134891	-2.24931	2.22708e-08	-0.316208	0.480859	CL;F4;F5	-	-	-	-	-1.2777	0.000360261	-1.24444	0.0216179	-1.27909	0.0161495	-	-	-	-	-	-	-	-	1.49271	1.48307e-07	yes
760	384.121	30577.5	no	no	no	yes	Nocardicin G	C15550	yes	no	-	2	C15550; C17355	C19H19N3O6; C21H21O7	-0.51078	0.000147058	-1.01215	0.0127454	-0.852414	0.00460027	-1.65608	0.0017461	B;CL;F4;F5;hive	-	-	-1.71979	0.00375577	-1.55256	0.000260481	-1.58891	0.0102002	-2.02848	0.000290134	-	-	-	-	-2.10223	0.000152163	-	-	4.95832	1.32524e-08	yes
761	384.24	18945.1	yes	substrate	no	no	Buspirone	C06861	no	no	-	1	C06861	C21H31N5O2	-0.386771	0.00207694	-0.595851	5.09204e-05	-0.526012	1.4959e-06	-0.185843	0.406923	B;CL;F4;F5	-	-	1.10387	0.00845501	-1.06559	0.000244374	-2.15732	7.53492e-09	-1.06871	0.0123659	-	-	-	-	-	-	-	-	1.18675	7.43085e-09	yes
762	385.129	78680.2	no	no	no	yes	Isosamidin	C09270	yes	no	-	5	C09270; C09284; C09307; C09310; C14948	C21H22O7	-0.622757	0.0203066	-0.490034	0.00668258	-0.519233	0.000289768	-3.45725	7.4043e-07	F4;G;hive	-	-	-	-	-	-	-1.50333	0.000475966	-	-	-	-	-1.17287	0.0148169	-2.48227	2.86472e-09	-	-	6.51656	2.02074e-08	yes
763	385.164	19854.7	yes	substrate	no	yes	Burseran	C10547	no	no	-	2	C10547; C10561	C22H26O6	-0.385998	0.00100458	-0.360674	0.000130615	-0.369673	5.99426e-08	-0.698877	1.39148e-05	CL;F4;F5;hive	-	-	-	-	-1.37132	1.37438e-05	-1.93391	2.74666e-06	-1.72009	3.71474e-05	-	-	-	-	-2.38029	9.85521e-09	-	-	0.29932	0.0560619	no
764	385.224	24666.9	yes	product	no	no	Oleandolide	C11990	no	no	-	1	C11990	C20H34O7	1.77258	0.00657877	1.34085	0.000136887	1.50229	2.86075e-06	2.44387	0.0215857	B;CL;hive	-	-	1.18534	0.00163617	1.12148	3.44608e-05	-	-	-	-	-	-	-	-	3.2488	1.53418e-11	-	-	3.75817	0.206485	yes
765	385.26	11158.8	yes	product	no	no	6-Deoxyerythronolide B	C03240	no	no	-	1	C03240	C21H38O6	0.634194	0.00572922	0.753921	2.82663e-05	0.695316	1.20705e-07	0.509784	0.0293095	B;CL;G;hive	-	-	2.3728	3.71109e-10	1.96466	3.38986e-11	-	-	-	-	-	-	0.94221	0.0443526	1.21319	0.0024476	-	-	2.25928	5.27137e-09	no
766	386.016	9829.6	no	no	no	yes	dCDP	C00705	no	no	Pyrimidine Nucleotides	1	C00705	C9H15N3O10P2	-0.371212	0.0337943	-0.385469	0.0420088	-0.377454	0.00290581	-0.733385	0.00101059	hive	-	-	-	-	-	-	-	-	-	-	-	-	-	-	-1.61644	0.0330904	-	-	2.31807	4.92255e-07	no
767	387	10603.2	no	no	no	no	dUDP	C01346	no	no	Pyrimidine Nucleotides	1	C01346	C9H14N2O11P2	0.0749469	0.36753	0.234868	0.000206986	0.176946	0.000196321	-0.0162411	0.927013	CL	-	-	-	-	1.42202	0.00595272	-	-	-	-	-	-	-	-	-	-	-	-	1.8844	3.75346e-16	yes
768	387.144	36387.8	no	no	no	yes	Alectrol	C09059	yes	no	Prenol Lipids	4	C09059; C09260; C09316; C10891	C21H24O7	-0.442816	0.0363446	-0.267595	0.16545	-0.328076	0.011679	-2.51979	1.11837e-05	hive	-	-	-	-	-	-	-	-	-	-	-	-	-	-	-2.13069	1.32e-06	-	-	5.12256	6.99854e-11	yes
769	387.165	12734.8	no	no	no	yes	Tuberonic acid glucoside	C08558	no	no	-	1	C08558	C18H28O9	-0.21009	0.0224341	0.0378808	0.683091	-0.0609733	0.355062	-0.467192	0.00054675	F4;hive;S	-	-	-	-	-	-	-1.73149	0.000333957	-	-	-	-	-	-	-1.42088	0.00638494	1.03298	0.0261518	3.12619	5.14234e-10	no
770	387.202	14494.6	no	no	no	no	Rehmaionoside C	C17452	yes	no	-	1	C17452	C19H32O8	0.172412	0.0580109	0.2577	0.000985125	0.215183	0.000725895	0.0162406	0.893596	F4;F5;G;S	-	-	-	-	-	-	-1.22438	0.0246961	2.24573	6.80976e-07	-	-	1.48573	0.00236548	-	-	1.0687	0.0133665	5.16368	2.28088e-08	yes
771	387.291	5331.47	no	no	no	yes	2alpha-Methyl-17beta-[(tetrahydro-2H-pyran-2-yl)oxy]-5alpha-androstan-3-one	C15422	yes	no	-	1	C15422	C25H40O3	-2.57922	0.004793	0.509224	0.355263	-0.907798	0.0705193	-1.3396	0.000441433		-	-	-	-	-	-	-	-	-	-	-	-	-	-	-	-	-	-	4.21225	0.000121941	yes
772	388.019	5176.08	no	no	no	no	Cyclothiazide	C12685	no	no	Diazines	1	C12685	C14H16ClN3O4S2	-0.0841829	0.280043	-0.133512	0.0363408	-0.11676	0.00888899	-0.141746	0.0251673		-	-	-	-	-	-	-	-	-	-	-	-	-	-	-	-	-	-	2.14089	2.33011e-16	no
773	388.098	7269.21	yes	substrate	no	yes	Cefprozil	C06888	no	no	Lactams	1	C06888	C18H19N3O5S	-0.316273	0.00123917	-0.315186	0.000342719	-0.31771	6.4196e-08	-0.783827	2.43469e-06	CL;F5;hive	-	-	-	-	-1.33918	5.90769e-06	-	-	-1.21073	0.00469966	-	-	-	-	-2.86036	1.76849e-11	-	-	2.61733	1.31479e-11	no
774	388.139	8865.12	no	no	no	yes	Senaetnine	C10386	no	no	-	1	C10386	C20H23NO7	-0.196384	0.0794205	-0.115165	0.328837	-0.147773	0.0506194	-1.15169	3.49405e-06	F4;hive	-	-	-	-	-	-	-1.33311	0.0158259	-	-	-	-	-	-	-2.36021	5.68825e-07	-	-	3.96653	4.96234e-12	no
775	389.218	8108.4	no	no	no	no	Rehmaionoside A	C17450	no	no	-	2	C17450; C17451	C19H34O8	-0.00569406	0.951306	0.136252	0.0524187	0.0725285	0.224745	-0.104021	0.324699	F4;G;S	-	-	-	-	-	-	-1.54639	0.000407263	-	-	-	-	1.84529	1.30391e-05	-	-	1.12516	0.00280975	2.01588	3.80606e-09	no
776	390.992	5661.39	yes	substrate	no	yes	Aurothioglucose	C08193	no	no	-	1	C08193	C6H11AuO5S	-0.207733	0.00638838	-0.219231	0.000103681	-0.214498	4.06434e-07	-0.362453	1.83204e-06	A1;CL;Fp;G;hive	-1.3277	0.0185194	-	-	-1.40482	0.000161738	-	-	-	-	-1.24725	0.00382693	-1.21675	0.043485	-2.21379	3.59428e-06	-	-	1.1391	2.01038e-11	no
777	393.193	29818.4	no	no	no	no	Nigakilactone M	C17035	no	no	-	2	C17035; C17036	C21H30O7	-0.430369	8.3429e-05	-0.148392	0.131974	-0.262605	0.000717354	-0.162841	0.439368		-	-	-	-	-	-	-	-	-	-	-	-	-	-	-	-	-	-	4.6408	4.61741e-11	no
778	395.188	59337.3	yes	product	yes	yes	9α-Fluoro-16α-hydroxyhydrocortisone	C14638	no	no	-	1	C14638	C21H29FO6	1.63769	0.00888602	1.90976	0.00221753	1.78403	2.21017e-05	3.52873	0.0022017	B;CL;hive	-	-	1.30736	1.7299e-06	0.936435	7.17143e-06	-	-	-	-	-	-	-	-	3.57982	1.53221e-11	-	-	3.78094	1.07779e-09	no
779	396.988	5589.95	no	no	no	no	Melarsoprol	C08001	no	no	-	1	C08001	C12H15AsN6OS2	-0.221562	0.017243	-0.105875	0.0188788	-0.147626	0.000354828	0.111862	0.285877	F4;Fp;G	-	-	-	-	-	-	1.16849	0.0368679	-	-	-1.40449	0.000239393	-1.28205	0.0143257	-	-	-	-	1.29675	9.27754e-11	no
780	397.166	12865.7	no	no	no	no	L-365260	C15026	no	no	-	1	C15026	C24H22N4O2	-0.278411	1.28542e-05	-0.0590125	0.501508	-0.154598	0.0217267	-0.269666	0.0136029	F4;G;S	-	-	-	-	-	-	-1.42184	0.00161316	-	-	-	-	1.93165	4.86546e-06	-	-	1.04567	0.00756328	3.13562	8.97615e-10	no
781	397.333	5558.92	no	no	no	yes	Lauroyl peroxide	C19438	no	no	-	1	C19438	C24H46O4	-0.648719	0.0166311	-0.396256	0.00326478	-0.488909	6.65171e-05	-0.609616	0.000901766	CL;F4;F5;hive	-	-	-	-	-1.04002	0.0232842	-1.55059	0.00546922	-1.74681	0.00100077	-	-	-	-	-1.49235	0.00880578	-	-	-1.10798	9.44931e-13	no
782	398.099	10697	no	no	no	yes	Nocardicin E	C01739	yes	no	-	2	C01739; C17354	C19H17N3O7	-0.313798	0.00465113	-1.34019	0.0128058	-1.03509	0.00696192	-1.62374	0.00610372	CL;hive	-	-	-	-	-1.39837	0.00609152	-	-	-	-	-	-	-	-	-1.56126	0.0364032	-	-	6.91797	3.11094e-06	yes
783	398.131	13751.9	yes	substrate	no	yes	Oxmetidine	C11803	no	no	Benzodioxoles	1	C11803	C19H21N5O3S	-0.637008	1.26736e-05	-0.895108	0.00215842	-0.801785	3.02491e-05	-1.22098	0.000442201	B;CL;F5;hive	-	-	-1.38525	0.0130755	-1.61665	1.16767e-05	-	-	-1.86577	0.000162968	-	-	-	-	-1.99683	4.37308e-05	-	-	4.62579	2.46916e-13	no
784	399.193	14373.8	yes	product	no	no	11-O-Demethyl-17-O-deacetylvindoline	C04318	no	no	-	1	C04318	C22H28N2O5	0.698025	0.00177166	1.44182	1.78449e-06	1.18256	2.46403e-08	0.0673307	0.798546	CL;F5	-	-	-	-	2.44021	1.53225e-11	-	-	0.978564	0.00141962	-	-	-	-	-	-	-	-	2.74305	3.33641e-09	no
785	401.016	16479.2	no	no	no	no	dTDP	C00363	no	no	Pyrimidine Nucleotides	1	C00363	C10H16N2O11P2	-0.0597943	0.691201	-0.126254	0.441565	-0.0983559	0.373118	-0.26321	0.151656		-	-	-	-	-	-	-	-	-	-	-	-	-	-	-	-	-	-	0.313016	0.154565	yes
786	401.255	17384.2	no	no	no	no	Erythronolide B	C06635	no	no	-	1	C06635	C21H38O7	0.620387	0.0274224	0.884387	0.000885626	0.770288	2.08575e-05	-0.0418391	0.693458	B;CL	-	-	3.90767	1.53221e-11	0.495328	1.52401e-05	-	-	-	-	-	-	-	-	-	-	-	-	2.57608	2.77631e-08	no
787	402.011	8515.59	no	no	no	no	CDP	C00112	no	no	Pyrimidine Nucleotides	1	C00112	C9H15N3O11P2	0.121575	0.105216	-0.0849111	0.164301	-0.0115702	0.805055	-0.0320998	0.674031		-	-	-	-	-	-	-	-	-	-	-	-	-	-	-	-	-	-	2.21166	9.62544e-10	no
788	402.14	8785.12	no	no	no	yes	Perphenazine	C07427	no	no	Phenothiazines	2	C07427; C13540	C21H26ClN3OS; C21H26ClN3OS.	0.278133	0.0248276	0.100691	0.205942	0.163858	0.00716595	-0.324443	2.69426e-05	F4	-	-	-	-	-	-	2.73623	1.04e-08	-	-	-	-	-	-	-	-	-	-	3.13742	1.479e-13	no
789	402.995	16453.5	no	no	no	no	UDP	C00015	no	no	Pyrimidine Nucleotides	1	C00015	C9H14N2O12P2	0.300615	0.0991922	0.221136	0.0248229	0.248604	0.00245894	0.105769	0.415403	CL;F5;G	-	-	-	-	0.827977	0.0476811	-	-	1.81957	2.96975e-05	-	-	-1.18656	0.0208635	-	-	-	-	1.80519	1.9356e-11	yes
790	404.171	9701.01	no	no	no	yes	Clivoline	C10282	yes	no	Alkaloids	1	C10282	C21H27NO7	-0.16323	0.169327	-0.0313719	0.751848	-0.0903321	0.225303	-0.647295	1.30533e-05	G;hive	-	-	-	-	-	-	-	-	-	-	-	-	1.72016	0.000209971	-1.80792	8.25924e-05	-	-	3.67718	1.41608e-13	yes
791	406.26	5160.46	no	no	no	yes	Cammaconine	C08666	no	no	-	2	C08666; C08701	C23H37NO5	0.350216	0.083846	0.374885	0.00188084	0.350245	0.000868101	1.14367	2.76541e-05	B;CL;G;hive	-	-	1.6173	8.08989e-07	0.78242	0.00446893	-	-	-	-	-	-	0.932678	0.0146438	3.18897	1.53301e-11	-	-	1.35311	1.05378e-09	no
792	407.281	4275.37	no	no	no	yes	Cholic acid	C00695	no	no	Steroids and Steroid Derivatives	14	C00695; C01558; C04661; C17644; C17647; C17649; C17650; C17654; C17657; C17667; C17668; C17726; C17727; C17737	C24H40O5	-0.27122	0.0951508	-0.0308037	0.71434	-0.123408	0.11133	-0.367532	0.00061134	F4;hive	-	-	-	-	-	-	-1.93179	0.000361514	-	-	-	-	-	-	-1.73504	0.00199508	-	-	1.83877	0.0318234	yes
793	408.132	11111.2	no	no	no	yes	SN-38 carboxylate form	C11366	yes	no	-	1	C11366	C22H21N2O6	-0.334961	0.0245859	-0.849964	3.3367e-05	-0.677667	1.40113e-05	-0.965663	0.000274284	CL;F4;F5;G;hive	-	-	-	-	-1.51211	3.61258e-08	1.16939	0.00271806	-1.96763	4.84062e-08	-	-	-1.04421	0.0115424	-1.65733	4.20182e-06	-	-	2.57866	6.76935e-19	yes
794	409.149	18690.1	yes	substrate	no	yes	Bruceine D	C08752	no	no	-	1	C08752	C20H26O9	-1.03013	1.21311e-06	-0.885806	3.71996e-07	-0.936249	7.11031e-14	-1.14207	1.88362e-07	B;CL;F4;hive	-	-	-1.09361	0.00147132	-1.81386	1.75135e-11	-1.34629	3.67647e-05	-	-	-	-	-	-	-2.16206	9.01563e-11	-	-	4.68315	6.76584e-13	no
795	410.026	16581.3	no	no	no	no	dADP	C00206	no	no	Purine Nucleotides	1	C00206	C10H15N5O9P2	0.00732207	0.974619	-0.253868	0.285309	-0.160093	0.325641	-0.347037	0.0916535		-	-	-	-	-	-	-	-	-	-	-	-	-	-	-	-	-	-	1.08268	0.00193791	no
796	410.155	11018.9	yes	substrate	no	yes	Ro 18-5364	C15665	yes	no	-	1	C15665	C22H25N3O3S	-0.906455	1.28542e-05	-0.54977	4.14377e-05	-0.668742	9.17747e-10	-1.07475	1.28232e-07	CL;F4;hive	-	-	-	-	-1.49264	4.65405e-07	-2.0713	1.08304e-07	-	-	-	-	-	-	-2.4742	4.91297e-10	-	-	3.87244	1.06964e-10	yes
797	411.109	11334.9	no	no	no	yes	Podophyllotoxone	C10875	yes	no	-	3	C10875; C12424; C20046	C22H20O8	-0.269021	0.0490544	-0.0446735	0.64314	-0.135095	0.066139	-0.514496	0.000405075	G;hive	-	-	-	-	-	-	-	-	-	-	-	-	2.04011	1.70745e-05	-1.68526	0.00063736	-	-	3.77416	1.4236e-11	yes
798	411.182	62935.1	no	no	no	yes	GF 109203X	C11238	yes	no	-	1	C11238	C25H24N4O2	0.410497	0.0586664	0.573071	0.000521298	0.489783	0.000143524	1.56318	0.00266737	B;CL;G;hive	-	-	1.97438	1.26696e-10	0.767254	0.00150642	-	-	-	-	-	-	0.837306	0.0165681	3.07578	1.53243e-11	-	-	4.83656	1.89424e-10	yes
799	413.111	12315.7	yes	substrate	no	yes	Futalosine	C16999	no	no	-	1	C16999	C19H18N4O7	-0.541028	0.000565844	-0.718062	0.000728762	-0.643677	0.000313517	-1.40965	1.55982e-05	B;CL;F4;F5;G;hive	-	-	-1.8272	0.000316589	-1.58732	2.45501e-05	-1.41	0.0128384	-1.28602	0.0334161	-	-	-1.9752	7.48975e-05	-2.52457	2.58088e-07	-	-	4.51523	1.7102e-10	no
800	413.199	69819	no	no	no	yes	Magnoshinin	C10658	no	no	-	4	C10658; C12512; C15382; C15440	C24H30O6	-0.453774	0.0318026	-0.0846792	0.456983	-0.215746	0.0276045	-1.19423	8.23923e-08	A1;B;F4;F5;G;hive	-1.5848	3.34268e-06	-1.13358	0.00194466	-	-	-1.3428	0.000114017	1.49625	1.24384e-05	-	-	0.961441	0.0158293	-1.64822	1.28872e-06	-	-	3.39977	1.18157e-07	no
801	415.092	11398.3	no	no	no	yes	O-Carbamoyl-deacetylcephalosporin C	C06568	no	no	-	1	C06568	C15H20N4O8S	-0.398246	0.000507462	-0.248622	0.0246101	-0.299547	7.01883e-05	-0.930587	7.28312e-06	hive	-	-	-	-	-	-	-	-	-	-	-	-	-	-	-2.36368	1.75e-06	-	-	4.54808	3.98627e-06	no
802	415.231	19104.4	no	no	no	no	Atractyloside G	C17864	no	no	-	1	C17864	C21H36O8	0.35882	0.0156829	0.433675	5.09204e-05	0.400718	3.07901e-07	-0.0250193	0.875775	CL;G	-	-	-	-	1.87259	4.35957e-07	-	-	-	-	-	-	1.82028	0.000307475	-	-	-	-	3.63474	6.991e-09	no
803	416.252	5901.28	no	no	no	yes	Istamycin A1	C17987	no	no	-	2	C17987; C17992	C18H35N5O6	-0.241831	0.242834	-0.198256	0.103685	-0.242277	0.0814326	-0.635341	0.00114361	G;S	-	-	-	-	-	-	-	-	-	-	-	-	2.28336	5.83637e-08	-	-	0.98791	0.0140357	3.14227	1.29995e-07	no
804	417.083	7206.96	no	no	no	no	5'-Butyrylphosphoinosine	C06435	yes	no	-	2	C06435; C20727	C14H19N4O9P; C20H18O10	-0.166618	0.0250036	-0.169509	0.00408685	-0.168446	9.60033e-05	0.277331	0.02992	CL;F4;F5;Fp;hive	-	-	-	-	-0.970743	0.0156066	-1.22207	0.024603	-1.23643	0.0218374	-0.968963	0.0357717	-	-	1.85603	5.03063e-05	-	-	4.96782	0.000304515	yes
805	418.955	11785.3	no	no	no	no	1D-myo-Inositol 1,3,4-trisphosphate	C01243	yes	no	Cyclic Alcohols and Derivatives	2	C01243; C01245	C6H15O15P3	-0.214808	0.137068	-0.447962	0.00263393	-0.361651	0.00179648	0.677132	0.146704	G;hive	-	-	-	-	-	-	-	-	-	-	-	-	-1.23126	0.0466683	1.88979	0.000152255	-	-	5.20022	1.1446e-11	yes
806	420.155	5673.9	no	no	no	yes	Topotecan	C11158	no	no	Camptothecins	1	C11158	C23H23N3O5	0.0601637	0.645056	0.132606	0.103879	0.0999153	0.118477	-0.376286	0.00370113	G;hive	-	-	-	-	-	-	-	-	-	-	-	-	1.78428	0.00035734	-1.41798	0.0099025	-	-	3.95607	3.61216e-15	no
807	421.225	13047.5	no	no	no	yes	1,4-Bis(2-ethylhexyl) sulfosuccinate	C07874	no	no	Carboxylic Acids and Derivatives	1	C07874	C20H38O7S	-0.204027	0.013411	0.0790812	0.447061	-0.0336146	0.647148	-0.431248	0.000499834	G;hive	-	-	-	-	-	-	-	-	-	-	-	-	1.26047	0.0462531	-1.38512	0.0185016	-	-	2.99626	3.85704e-12	no
808	421.405	5508.41	yes	substrate	no	yes	Decyl oleate	C20365	no	no	-	1	C20365	C28H54O2	-2.52882	0.000233995	-1.2763	0.000337561	-1.73889	2.24521e-07	-1.37256	0.000913288	A1;CL;F5;hive;S	1.13181	0.0132984	-	-	-1.0878	0.000515195	-	-	-1.18145	0.008041	-	-	-	-	-1.13717	0.0126058	1.17341	0.000552269	2.01332	2.33925e-06	no
809	422.024	8879.14	no	no	no	yes	Glucoiberin	C08411	no	no	Monosaccharides	1	C08411	C11H21NO10S3	-0.466468	0.241546	-0.653154	0.0220281	-0.587616	0.00598464	-0.841436	0.00745857		-	-	-	-	-	-	-	-	-	-	-	-	-	-	-	-	-	-	4.32021	0.0030786	no
810	422.058	15547.6	yes	substrate	no	yes	Gluconasturtiin	C08417	yes	no	Monosaccharides	1	C08417	C15H21NO9S2	-0.538941	2.1321e-05	-0.498986	4.59407e-06	-0.513834	4.41793e-11	-0.747877	5.92409e-07	CL;F5;Fp;hive	-	-	-	-	-1.70504	4.69778e-09	-	-	-0.953265	0.04888	-1.0602	0.00144217	-	-	-2.35888	9.32665e-10	-	-	2.64831	9.87012e-10	yes
811	423.202	12302.8	no	no	no	no	Didrovaltratum	C09776	yes	no	-	3	C09776; C17032; C19952	C22H32O8	-0.346657	0.0188964	-0.291447	0.0235216	-0.316803	0.00026416	0.178504	0.0946246	F4	-	-	-	-	-	-	-1.97238	4.63e-05	-	-	-	-	-	-	-	-	-	-	3.12896	1.50876e-10	yes
812	423.208	9728.45	no	no	no	no	Difenoxin	C07871	no	no	-	1	C07871	C28H28N2O2	-0.256202	0.0710877	-0.185024	0.100413	-0.21819	0.00649437	0.226982	0.0482062	F4;S	-	-	-	-	-	-	-1.79417	0.00030136	-	-	-	-	-	-	-	-	1.05348	0.028875	2.89925	1.25896e-09	no
813	424.04	7814.89	yes	substrate	no	no	Sinalbin	C08426	no	no	-	1	C08426	C14H19NO10S2	-0.408941	0.00994124	-0.44834	0.000290531	-0.435497	1.68998e-06	-0.331538	0.0131868	CL;F4;F5;Fp;hive	-	-	-	-	-2.05175	2.60203e-08	-1.96651	5.99199e-05	-2.1247	1.18269e-05	-1.31289	0.0021834	-	-	-1.57703	0.00252791	-	-	2.01782	3.58146e-09	no
814	424.25	3567.75	no	no	no	yes	Diprenorphine	C11794	no	no	-	1	C11794	C26H35NO4	-0.194234	0.038324	0.00922283	0.902025	-0.0798667	0.226182	-0.280932	0.000746847	F4;G;hive;S	-	-	-	-	-	-	-1.36745	0.00357831	-	-	-	-	1.7672	4.83452e-05	-1.11694	0.0359116	1.00469	0.0146944	2.00458	9.7215e-08	no
815	425.081	158095	no	no	no	no	S-Glutathionyl-L-cysteine	C05526	no	no	-	1	C05526	C13H22N4O8S2	-0.159655	0.146098	-0.370003	0.00160067	-0.297227	0.000234251	-0.404708	0.0453945	CL;F4;hive	-	-	-	-	-1.32681	0.00263746	-2.1063	0.00011824	-	-	-	-	-	-	-1.43468	0.0271571	-	-	0.181004	0.578271	yes
816	426.022	133794	no	no	no	no	ADP	C00008	no	no	Purine Nucleotides	4	C00008; C00054; C00361; C03850	C10H15N5O10P2	0.332266	0.162669	-0.310703	0.132789	-0.0917774	0.56916	-0.436601	0.0622914	G	-	-	-	-	-	-	-	-	-	-	-	-	-1.89561	0.0073585	-	-	-	-	1.24476	0.0602081	yes
817	427.177	38785.3	yes	product	yes	yes	Pseudorhodomyrtoxin	C08951	yes	no	-	1	C08951	C24H28O7	2.16212	0.000903578	2.05284	0.000142198	2.07698	3.25048e-07	2.30082	0.00988936	B;CL;hive	-	-	2.99132	1.53243e-11	1.50897	7.87966e-11	-	-	-	-	-	-	-	-	1.88183	4.01863e-10	-	-	3.20896	3.47756e-11	yes
818	429.193	33278.9	no	no	no	no	Athamantin	C09123	no	no	-	1	C09123	C24H30O7	0.263941	0.167007	0.458934	0.0167002	0.386848	0.00329599	-0.211841	0.458787	CL	-	-	-	-	1.14655	0.0142336	-	-	-	-	-	-	-	-	-	-	-	-	4.05865	3.10996e-11	no
819	430.03	8836.94	no	no	no	no	Bensultap	C18563	no	no	-	1	C18563	C17H21NO4S4	-0.532136	0.0235301	-0.419618	0.0103649	-0.453046	0.000208121	-0.238407	0.330687		-	-	-	-	-	-	-	-	-	-	-	-	-	-	-	-	-	-	3.74247	2.59597e-13	no
820	430.182	26772.9	yes	substrate	no	yes	Glenvastatin	C11699	no	no	-	1	C11699	C27H26FNO3	-0.589972	1.26736e-05	-0.631719	8.77276e-06	-0.624429	3.81966e-10	-0.914532	1.14453e-06	B;CL;F4;hive	-	-	-1.61309	1.12887e-06	-1.38711	4.1713e-08	-1.38049	3.89003e-05	-	-	-	-	-	-	-1.83654	3.38927e-08	-	-	4.64291	4.8229e-12	no
821	431.099	106833	yes	substrate	yes	no	Afzelin	C09126	yes	MS/MS fragementation	Flavonoids	7	C01460; C01714; C04608; C09126; C10345; C10420; C16911	C21H20O10	-3.33244	0.000614619	-3.80742	0.00259541	-3.63436	8.15761e-06	-1.21366	0.0986659	B;CL;F4;F5;G	-	-	-1.27269	0.0161262	-1.30608	0.000223362	-1.20538	0.0283082	-1.22174	0.0247546	-	-	1.71866	0.000219261	-	-	-	-	6.48307	2.58924e-05	yes
822	431.171	27314.4	no	no	no	yes	Salvinorin A	C20196	yes	no	-	1	C20196	C23H28O8	-0.400117	0.012527	-0.29656	0.0527257	-0.335593	0.00105771	-1.26819	2.43837e-05	F4;hive	-	-	-	-	-	-	-1.69318	0.00026511	-	-	-	-	-	-	-2.11474	2.59385e-06	-	-	3.49216	1.0399e-18	yes
823	433.236	7566.71	no	no	no	no	Oleoylglycerone phosphate	C03630	no	no	-	1	C03630	C21H39O7P	0.126244	0.0991796	0.147935	0.0604527	0.127798	0.0531615	-0.14369	0.181467	F4;F5;G	-	-	-	-	-	-	-1.44694	0.00242055	1.28543	0.0111419	-	-	2.01369	5.3042e-06	-	-	-	-	2.22562	8.96507e-08	no
824	434.024	5594.62	no	no	no	yes	Glucoraphenin	C08420	no	no	-	1	C08420	C12H21NO10S3	-0.127005	0.107107	-0.357538	0.00225927	-0.273804	0.000617836	-0.551139	0.000105925	A1;CL;F4;F5;Fp;G;hive;S	-1.74251	0.0013342	-	-	-1.8035	3.49997e-06	-1.49067	0.0108009	-1.97337	0.000164829	-1.3726	0.00258565	-1.28764	0.0478285	-2.60881	3.17473e-07	-1.47126	0.000914071	1.53633	2.83867e-14	no
825	435.13	8242.14	yes	substrate	no	yes	Phlorizin	C01604	yes	no	Flavonoids	1	C01604	C21H24O10	-0.870578	6.53508e-07	-0.665979	2.60142e-05	-0.748277	5.44588e-10	-0.966925	2.17925e-06	B;CL;F4;hive;S	-	-	-1.30781	0.000110912	-1.45626	9.60917e-09	-1.26292	0.000211895	-	-	-	-	-	-	-1.92364	8.28883e-09	1.03107	0.000250224	5.03703	2.09415e-12	yes
826	435.203	10018.7	no	no	no	no	Polhovolide	C09532	no	no	-	1	C09532	C23H32O8	-0.159367	0.10956	0.599358	0.0667344	0.365394	0.107705	0.623426	0.144171	F5	-	-	-	-	-	-	-	-	2.32156	2.22e-05	-	-	-	-	-	-	-	-	2.98814	1.321e-10	no
827	435.252	11921.8	no	no	no	yes	Stearoylglycerone phosphate	C03805	yes	no	Fatty Acid Esters	1	C03805	C21H41O7P	-0.461194	0.000779716	-0.217961	0.0827356	-0.298926	0.000612248	-1.02368	4.19411e-06	hive	-	-	-	-	-	-	-	-	-	-	-	-	-	-	-2.52869	4.17e-07	-	-	4.37139	1.18983e-17	yes
828	436.224	32440	yes	substrate	yes	yes	Lunarine	C10603	yes	no	-	1	C10603	C25H31N3O4	-1.99902	0.00116606	-2.32384	0.000563518	-2.20669	5.89333e-07	-2.59359	0.000398536	CL;F5;hive	-	-	-	-	-1.28765	0.00132698	-	-	-1.30485	0.0323752	-	-	-	-	-1.34246	0.0244906	-	-	5.07027	2.18587e-09	yes
829	438.053	7621.6	no	no	no	yes	Glucolimnanthin	C08414	yes	no	-	3	C08414; C17273; C17274	C15H21NO10S2	-0.140752	0.162632	-0.154218	0.0177568	-0.149859	0.0018684	-0.313734	0.000132117	hive	-	-	-	-	-	-	-	-	-	-	-	-	-	-	-1.96918	0.00045457	-	-	3.0208	1.07549e-13	yes
830	439.358	3172.73	no	no	no	yes	Karounidiol	C17394	no	no	-	3	C17394; C17422; C19943	C30H48O2	-1.0512	0.000881821	-0.197481	0.462607	-0.470174	0.0181448	-0.829244	9.12973e-06	A1;S	2.50521	1.82511e-08	-	-	-	-	-	-	-	-	-	-	-	-	-	-	1.06481	0.0108918	0.753816	6.40582e-09	no
831	441.156	8376.14	no	no	no	no	Mallotochromene	C09013	yes	no	-	1	C09013	C24H26O8	-0.0698012	0.440063	-0.0815183	0.405868	-0.0853657	0.215962	0.0409382	0.758358	F4;G	-	-	-	-	-	-	-1.77889	0.00150835	-	-	-	-	1.36194	0.0373945	-	-	-	-	3.73629	5.62142e-14	yes
832	441.284	20659.3	no	no	no	yes	L-Ascorbic acid, 6-octadecanoate	C20340	no	no	-	1	C20340	C24H42O7	0.483129	0.026985	0.91499	9.85064e-05	0.71832	5.84623e-06	1.26539	0.00778291	A1;B;CL;hive	1.07286	0.0369971	1.51989	0.000401688	1.70638	6.12285e-08	-	-	-	-	-	-	-	-	2.70521	1.88737e-10	-	-	1.81336	2.72606e-07	no
833	442.017	19768.9	no	no	no	no	GDP	C00035	no	no	Purine Nucleotides	2	C00035; C20176	C10H15N5O11P2	0.0939864	0.496815	-0.208905	0.337788	-0.100851	0.471406	-0.257635	0.216284		-	-	-	-	-	-	-	-	-	-	-	-	-	-	-	-	-	-	1.99448	0.000521591	no
834	445.08	112562	yes	substrate	no	yes	Paederoside	C09795	no	no	-	1	C09795	C18H22O11S	-0.608055	3.00484e-07	-0.601669	2.79444e-07	-0.605549	8.96035e-14	-0.833801	3.1738e-05	CL;F4;F5;Fp;G;hive	-	-	-	-	-1.99519	2.10062e-11	-1.42761	0.00012624	-1.61262	1.03595e-05	-0.76717	0.0423277	-1.57831	1.66066e-05	-2.56823	2.75437e-11	-	-	1.9584	1.0954e-07	no
835	447.093	267867	yes	substrate	yes	yes	Quercitrin	C01750	yes	no	Flavonoids	10	C01750; C01821; C03951; C08598; C10042; C10114; C12249; C12626; C16409; C17056	C21H20O11	-4.16946	0.000110731	-4.07897	0.000118932	-4.09381	4.9437e-08	-4.60809	9.6499e-05	B;CL;F4;F5;G;hive	-	-	-1.69073	0.000266184	-1.69309	7.08249e-07	-1.69578	0.000252423	-1.74152	0.000155688	-	-	-1.16193	0.0380866	-1.72578	0.000183976	-	-	7.76906	7.33179e-09	yes
836	447.19	10848.2	no	no	no	yes	Obliquine	C12183	no	no	-	1	C12183	C26H28N2O5	-0.217374	0.0275952	-0.399144	0.0140125	-0.336976	0.000709786	-0.716711	0.000755209	B;CL;F4;hive	-	-	-1.50841	0.00486333	-0.967088	0.0332132	-1.9055	0.000118281	-	-	-	-	-	-	-1.56659	0.00291742	-	-	3.78368	3.7597e-10	no
837	447.204	12869.6	no	no	no	no	Estradiol-17alpha 3-D-glucuronoside	C04300	no	no	Steroids and Steroid Derivatives	4	C04300; C05503; C09121; C11237	C24H32O8	-0.0943837	0.440956	-0.171609	0.187194	-0.148591	0.0956572	-0.5871	0.0124704	A1;B;F4;F5;G;hive	-1.16245	0.0120268	-1.35833	0.00154441	-	-	-1.55046	0.000170403	1.06756	0.0296002	-	-	1.32539	0.00221521	-1.25966	0.00447086	-	-	3.22961	7.98598e-11	no
838	447.261	10323	no	no	no	no	N-Acetyl-leu-leu-tyr-amide	C11297	no	no	-	1	C11297	C23H36N4O5	-0.161009	0.0925395	-0.132014	0.10821	-0.153347	0.0258295	-0.281632	0.0397396	F4	-	-	-	-	-	-	-2.35064	4.33e-08	-	-	-	-	-	-	-	-	-	-	2.96185	3.11837e-08	no
839	449.253	5916.07	no	no	no	no	Laserpitin	C09697	no	no	-	1	C09697	C25H38O7	-0.227974	0.0652908	-0.114627	0.166513	-0.172102	0.0240285	-0.0702795	0.439172	B;F4;G;S	-	-	-0.954025	0.0317948	-	-	-2.04946	1.74676e-08	-	-	-	-	1.73091	1.70471e-06	-	-	0.948056	0.00368666	2.7	1.20249e-07	no
840	449.363	2463.08	yes	substrate	no	yes	6-Deoxocastasterone	C15802	no	no	Steroids and Steroid Derivatives	1	C15802	C28H50O4	-1.88056	0.000382722	-0.978423	0.000681627	-1.2792	1.19332e-07	-1.2997	0.00248137	CL	-	-	-	-	-1.09929	0.0238473	-	-	-	-	-	-	-	-	-	-	-	-	0.080538	0.764809	no
841	450.082	5375.74	yes	substrate	no	yes	5'-Benzoylphosphoadenosine	C06433	no	no	-	1	C06433	C17H18N5O8P	-0.53363	0.00220919	-0.499547	3.90631e-05	-0.518452	1.37939e-09	-0.825362	1.27573e-06	CL;F4;F5;hive	-	-	-	-	-1.58401	9.44718e-08	-1.45469	0.000308999	-1.28984	0.00210932	-	-	-	-	-2.35791	2.32367e-09	-	-	2.16424	8.20315e-13	no
842	450.208	7540.14	no	no	no	no	Formylmethionyl-leucyl-phenylalanine methyl ester	C11221	no	no	Peptides	1	C11221	C22H33N3O5S	-0.0586492	0.578951	0.523444	0.126043	0.328733	0.144806	0.518	0.258078		-	-	-	-	-	-	-	-	-	-	-	-	-	-	-	-	-	-	3.74405	3.85278e-11	no
843	452.014	5746.9	yes	substrate	no	no	Cefazolin sodium	C08098	no	no	-	1	C08098	C14H13N8O4S3.	-0.26492	0.00387524	-0.185871	0.00668258	-0.214781	2.61804e-05	-0.0897758	0.283919	CL	-	-	-	-	-1.34595	0.012956	-	-	-	-	-	-	-	-	-	-	-	-	1.4718	1.02974e-11	no
844	452.037	5083.71	yes	substrate	no	yes	Glucoerysolin	C08410	no	no	-	1	C08410	C12H23NO11S3	-0.480889	2.72599e-05	-0.493513	4.22733e-05	-0.488499	4.60402e-09	-0.579451	4.18532e-05	CL;F5;hive	-	-	-	-	-1.83244	1.28614e-07	-	-	-1.6165	0.00073343	-	-	-	-	-2.09225	4.61782e-06	-	-	3.26317	4.77077e-14	no
845	452.934	4980.97	no	no	no	no	DIDS	C11591	no	no	-	1	C11591	C16H10N2O6S4	0.0334995	0.781782	-0.0479899	0.507948	-0.0162284	0.77441	-0.063251	0.54132		-	-	-	-	-	-	-	-	-	-	-	-	-	-	-	-	-	-	-0.576477	0.00263797	no
846	455.188	9773.35	no	no	no	yes	Delavirdine	C06941	yes	no	Indoles	2	C06941; C08087	C22H28N6O3S; C22H28N6O3S.	-0.166707	0.27012	-0.000184241	0.998268	-0.065893	0.376504	-0.56047	9.08775e-05	hive;S	-	-	-	-	-	-	-	-	-	-	-	-	-	-	-1.20529	0.0402614	1.70926	1.05758e-05	4.85086	2.70289e-14	yes
847	455.232	10846.4	no	no	no	no	Phytyl diphosphate	C05427	no	no	-	2	C05427; C11717	C20H42O7P2; C21H36N4O5S	0.175376	0.176585	0.593651	1.1803e-05	0.458448	1.09937e-05	-0.173461	0.358036	CL	-	-	-	-	2.06705	2.54e-09	-	-	-	-	-	-	-	-	-	-	-	-	3.63083	1.60212e-09	no
848	455.353	4302.67	yes	substrate	no	yes	Betulinic acid	C08619	no	no	Prenol Lipids	6	C08619; C08623; C08988; C17148; C17420; C20510	C30H48O3	-1.2087	0.00976907	-0.816527	0.00411459	-0.957114	3.53349e-05	-1.84529	7.51367e-05	B;F4;F5;hive	-	-	-1.27733	0.0475582	-	-	-1.4651	0.011933	-1.60851	0.0037193	-	-	-	-	-1.51001	0.00835923	-	-	2.25965	5.20165e-08	no
849	456.15	50065.4	no	no	no	yes	Amygdalin	C08325	no	no	Disaccharides	1	C08325	C20H27NO11	0.0222882	0.848387	0.0481003	0.539307	0.0333945	0.576348	-0.349342	0.000620928	F4;hive	-	-	-	-	-	-	-1.41835	0.0165869	-	-	-	-	-	-	-1.58528	0.00434712	-	-	5.8555	1.33432e-12	no
850	458.281	8830.59	no	no	no	no	Deoxytubulosine	C11817	yes	no	Alkaloids	1	C11817	C29H37N3O2	0.246057	0.0373819	0.480796	0.000120114	0.371841	6.31545e-05	0.28033	0.189698	CL;G	-	-	-	-	1.58345	1.78358e-05	-	-	-	-	-	-	2.01334	3.59606e-05	-	-	-	-	4.04158	1.83792e-07	yes
851	460.077	4864.43	no	no	no	no	3-Phosphoglycerol-glutathione	C03928	no	no	-	1	C03928	C13H24N3O11PS	0.0369681	0.687342	-0.0619714	0.407098	-0.026667	0.610157	-0.0132282	0.955216		-	-	-	-	-	-	-	-	-	-	-	-	-	-	-	-	-	-	3.37492	7.48582e-10	no
852	460.329	5701.56	no	no	no	yes	Psychosine	C01747	no	no	Sphingolipids	2	C01747; C03108	C24H47NO7	-0.234326	0.00763282	-0.143349	0.0354721	-0.176044	0.000519879	-0.386482	1.20689e-05	B;F4;hive	-	-	-2.26272	5.0825e-07	-	-	-1.68499	0.000301505	-	-	-	-	-	-	-1.81053	7.97849e-05	-	-	-0.509527	2.24364e-10	no
853	461.109	24835.5	yes	substrate	yes	yes	Methoxyluteolin-rhamnoside	C10104	yes	MS/MS fragementation	Flavonoids	5	C05990; C10104; C10187; C10533; C17762	C22H22O11	-2.54861	0.000142684	-2.41841	4.14377e-05	-2.47654	3.50929e-09	-2.9214	2.22329e-05	B;CL;F4;F5;G;hive	-	-	-1.13917	0.000900468	-1.24384	4.9485e-07	-1.26963	0.00013871	-1.27822	0.000122209	-	-	2.15341	1.33214e-10	-1.32809	5.81767e-05	-	-	5.38225	7.99764e-07	yes
854	461.202	14168.7	no	no	no	no	Patrinoside	C11640	yes	no	-	2	C11640; C17068	C21H34O11	-0.196654	0.267142	0.0648581	0.619584	-0.0477431	0.64037	0.38237	0.0198362	F4;G	-	-	-	-	-	-	-1.29402	0.0202341	-	-	-	-	2.11963	6.59822e-06	-	-	-	-	3.82651	9.62335e-10	yes
855	463.088	32089.7	yes	substrate	no	no	Quercetin 3-O-glucoside	C05623	yes	no	Flavonoids	7	C05623; C10050; C10073; C10108; C12639; C16410; C17763	C21H20O12	-0.940109	0.00174103	-0.759147	0.000616102	-0.805696	1.37981e-06	1.28166	0.292592	hive	-	-	-	-	-	-	-	-	-	-	-	-	-	-	1.92596	0.0018456	-	-	7.57288	1.78745e-09	yes
856	463.124	13412.8	yes	substrate	no	yes	Hesperetin 7-O-glucoside	C16422	yes	no	Flavonoids	1	C16422	C22H24O11	-1.63117	0.000150447	-1.66177	0.000523355	-1.65149	2.6886e-07	-1.90831	0.000272624	B;CL;F4;F5;Fp;hive	-	-	-1.46864	0.0057659	-1.79573	7.62811e-07	-1.45222	0.00664678	-1.58967	0.00195142	-1.35269	0.00120513	-	-	-1.92608	7.41129e-05	-	-	4.00632	4.51738e-12	yes
857	463.452	3330.02	no	no	no	no	14,16-Hentriacontanedione	C08377	yes	no	-	1	C08377	C31H60O2	-2.42737	0.0022653	-0.861526	0.0368346	-1.37406	7.92756e-05	-0.30062	0.586566	S	-	-	-	-	-	-	-	-	-	-	-	-	-	-	-	-	1.1348	0.0160076	4.03782	5.6699e-07	yes
858	464.218	9707.41	no	no	no	no	Codonocarpine	C10582	yes	no	-	1	C10582	C26H31N3O5	-0.033431	0.784062	-0.000537324	0.995321	-0.0270966	0.734609	-0.293017	0.0123939	G	-	-	-	-	-	-	-	-	-	-	-	-	2.29343	1.66e-07	-	-	-	-	4.03222	7.55849e-11	yes
859	465.25	6219.88	no	no	no	no	Androsterone glucuronide	C11135	no	no	Steroids and Steroid Derivatives	2	C11135; C11136	C25H38O8	-0.143669	0.188084	0.101747	0.221116	-0.00767929	0.920197	0.00498509	0.970669	F4;G;S	-	-	-	-	-	-	-1.91341	1.39025e-05	-	-	-	-	1.68136	0.000185499	-	-	1.02793	0.0142647	2.54667	1.09786e-10	no
860	465.982	7839.81	no	no	no	no	dCTP	C00458	no	no	Pyrimidine Nucleotides	1	C00458	C9H16N3O13P3	0.114527	0.727709	-0.257884	0.391053	-0.126833	0.552936	-0.718226	0.01852		-	-	-	-	-	-	-	-	-	-	-	-	-	-	-	-	-	-	1.95325	0.00352115	no
861	466.252	9651.86	no	no	no	no	Tobramycin	C00397	no	no	Disaccharides	1	C00397	C18H37N5O9	-0.306375	0.00600327	-0.0464938	0.69367	-0.165508	0.0738586	0.0144528	0.914555	Fp;G;S	-	-	-	-	-	-	-	-	-	-	1.11995	0.017954	1.98595	5.94286e-05	-	-	1.21825	0.0067758	2.64099	2.88761e-10	no
862	467.134	88599.4	yes	substrate	no	yes	104-1	C12403	no	no	-	3	C12403; C12407; C18778	C25H24O9	-0.52824	2.41447e-05	-0.47261	1.62295e-06	-0.496252	1.41751e-11	-0.892367	5.1794e-08	CL;F4;hive;S	-	-	-	-	-1.52635	3.22035e-10	-1.15131	0.000373152	-	-	-	-	-	-	-2.52044	1.54513e-11	0.679367	0.0310095	0.937963	8.00464e-07	yes
863	467.191	10874.5	no	no	no	yes	Paucin	C09525	no	no	-	1	C09525	C23H32O10	-0.261375	0.00959963	-0.166526	0.0539296	-0.212369	0.00161842	-0.39923	0.000452697	F4;G;hive	-	-	-	-	-	-	-1.42155	0.0138639	-	-	-	-	1.25723	0.0471139	-1.4508	0.0109912	-	-	0.624796	0.00012697	no
864	468.064	19340.9	no	no	no	yes	2-(alpha-Hydroxyethyl)thiamine diphosphate	C05125	no	no	Thiamines	1	C05125	C14H23N4O8P2S	-0.395322	0.440063	-0.913171	0.000394185	-0.729721	0.00151545	-0.777201	0.00670362		-	-	-	-	-	-	-	-	-	-	-	-	-	-	-	-	-	-	0.485303	0.0902847	no
865	471.093	8045.29	yes	substrate	no	yes	Tetracenomycin C	C06801	no	no	-	1	C06801	C23H20O11	-0.461145	0.000317802	-0.2299	0.00294947	-0.320724	1.3553e-06	-0.725943	4.39516e-07	CL;hive;S	-	-	-	-	-0.943542	0.00557507	-	-	-	-	-	-	-	-	-2.53265	6.58319e-10	0.834618	0.048723	1.57965	3.64391e-08	no
866	471.166	17305.6	yes	substrate	no	yes	C1'-C9-Glycosylated UWM6	C18681	yes	no	-	1	C18681	C25H28O9	-0.515928	0.00198627	-0.423916	0.00554988	-0.459001	9.94545e-06	-1.17011	7.29778e-06	CL;F4;hive	-	-	-	-	-0.974605	0.00643698	-1.55014	0.000381898	-	-	-	-	-	-	-2.12687	4.13758e-07	-	-	5.10627	1.47831e-11	yes
867	471.384	2270.61	no	no	no	yes	alpha-Tocopherol acetate	C13202	no	no	-	2	C13202; C17423	C31H52O3	-1.36915	0.0582537	-1.12798	0.0195054	-1.21693	0.00113923	-1.51362	0.00639898		-	-	-	-	-	-	-	-	-	-	-	-	-	-	-	-	-	-	0.209467	0.441687	no
868	472.114	6438.66	no	no	no	yes	CMP-N-trimethyl-2-aminoethylphosphonate	C05674	no	no	Carbohydrates and Carbohydrate Conjugates	1	C05674	C14H27N4O10P2	-0.154081	0.13086	-0.132592	0.0895495	-0.147036	0.0125444	-0.438134	0.000379446	F4;G;hive	-	-	-	-	-	-	-1.24082	0.0439264	-	-	-	-	1.27544	0.0341156	-1.94014	9.42422e-05	-	-	3.32918	5.92824e-13	no
869	473.073	9595.72	no	no	no	yes	Chicoric acid	C10437	no	no	Cinnamic Acid Derivatives	1	C10437	C22H18O12	-0.23513	0.0757156	-0.0597946	0.616042	-0.134962	0.113797	-0.632156	0.000408317	hive	-	-	-	-	-	-	-	-	-	-	-	-	-	-	-1.82684	0.000757071	-	-	2.30483	2.99957e-13	no
870	473.181	40752.1	no	no	no	yes	Robustaol A	C09968	yes	no	-	1	C09968	C25H30O9	-0.196174	0.382361	0.085201	0.68429	-0.0194543	0.893056	-2.27107	2.65818e-05	hive	-	-	-	-	-	-	-	-	-	-	-	-	-	-	-1.9781	7.51e-05	-	-	6.02051	4.99205e-11	yes
871	475.197	16523	no	no	no	yes	2-Methoxyestrone 3-glucuronide	C11132	yes	no	-	1	C11132	C25H32O9	-0.295942	0.162325	-0.0882659	0.637115	-0.171558	0.186271	-1.64901	5.05905e-05	F4;hive	-	-	-	-	-	-	-1.33277	0.0268861	-	-	-	-	-	-	-2.05367	4.49187e-05	-	-	4.84635	4.08004e-11	yes
872	475.235	6874.97	no	no	no	no	all-trans-Retinoyl-beta-glucuronide	C11061	no	no	Prenol Lipids	1	C11061	C26H36O8	0.0907164	0.342039	0.227919	0.00663493	0.1673	0.00706252	-0.0453016	0.675623	CL;F4;G	-	-	-	-	0.982905	0.01	-1.76288	8.21711e-05	-	-	-	-	1.97988	7.11913e-06	-	-	-	-	2.89689	1.3266e-09	no
873	475.268	10073.9	no	no	no	no	Cyclic-3,20-bis(1,2-ethanediyl acetal)-11alpha-(acetyloxy)-5alpha,6alpha-ep...	C14990	no	no	-	1	C14990	C27H40O7	-0.404041	0.00558345	-0.187031	0.0643782	-0.279565	0.00100474	0.134362	0.428661	F4	-	-	-	-	-	-	-1.91126	4.68e-05	-	-	-	-	-	-	-	-	-	-	2.20043	2.35436e-08	no
874	476.184	8157.3	yes	substrate	no	yes	19-Chloroproansamitocin	C20134	no	no	-	1	C20134	C25H32ClNO6	-0.58225	0.00378203	-0.399544	0.00458224	-0.482597	9.84876e-06	-1.12927	4.63908e-06	CL;F4;hive	-	-	-	-	-1.04466	0.00853759	-1.17074	0.0450845	-	-	-	-	-	-	-2.34433	3.62552e-07	-	-	4.14624	1.06984e-14	no
875	477.065	11027.5	yes	substrate	no	yes	4-Methoxyglucobrassicin	C08423	yes	no	-	2	C08423; C08424	C17H22N2O10S2	-0.921061	7.47184e-07	-0.672745	3.63619e-07	-0.775312	4.43755e-11	-0.739051	1.31813e-05	CL;Fp;hive;S	-	-	-	-	-1.68834	3.20384e-09	-	-	-	-	-1.12138	0.000409892	-	-	-1.81599	9.40924e-07	0.884089	0.0119237	4.58261	7.55849e-11	yes
876	477.197	7718.31	no	no	no	yes	Kanokoside B	C17429	yes	no	-	1	C17429	C21H34O12	-0.272437	0.0551445	-0.028922	0.772248	-0.124576	0.0961916	-0.634461	3.09901e-05	G;hive	-	-	-	-	-	-	-	-	-	-	-	-	1.2261	0.0226298	-1.86957	3.92774e-05	-	-	4.18085	1.81668e-10	yes
877	478.233	9475.81	no	no	no	no	Fumitremorgin B	C20630	no	no	-	1	C20630	C27H33N3O5	0.358816	0.133108	0.603432	0.000982493	0.492409	0.000275207	-0.122519	0.388072	CL;G	-	-	-	-	1.06869	0.0014712	-	-	-	-	-	-	2.861	4.1508e-11	-	-	-	-	4.12716	1.07004e-07	no
878	479.083	12611.7	no	no	no	yes	Gossypin	C10051	yes	no	-	3	C10051; C17514; C17520	C21H20O13	-0.401813	0.0601477	-0.228052	0.15334	-0.266857	0.0425692	-1.56444	2.3858e-07	B;F4;hive	-	-	-1.74625	0.000197138	-	-	-1.27256	0.0179947	-	-	-	-	-	-	-2.69934	4.66207e-09	-	-	7.47809	1.1401e-08	yes
879	479.12	9634.59	yes	substrate	no	yes	Cefepime	C08111	no	no	Lactams	1	C08111	C19H24N6O5S2	-0.927326	1.00037e-05	-0.75994	0.000151725	-0.835452	1.8399e-08	-1.31379	6.54017e-06	B;CL;F4;hive;S	-	-	-1.19238	0.0042559	-1.26683	1.23474e-05	-0.963068	0.0447448	-	-	-	-	-	-	-1.84925	1.04499e-06	0.831514	0.0289489	4.43872	9.78106e-11	no
880	479.483	47321.2	yes	substrate	no	no	1-Hexadecyl hexadecanoate	C13821	no	no	-	1	C13821	C32H64O2	-2.96715	0.001024	-1.63177	0.000360504	-2.15667	2.1906e-06	-0.030457	0.967052	A1;CL;F4	1.25052	0.0178498	-	-	-1.12358	0.00222718	-1.20022	0.0272422	-	-	-	-	-	-	-	-	-	-	-0.702383	0.0701923	no
881	480.111	13901.1	yes	substrate	no	yes	Yersiniabactin	C12038	no	no	-	1	C12038	C21H27N3O4S3	-0.2865	0.00156522	-0.671953	0.000333286	-0.532589	1.23484e-06	-1.0889	1.64611e-05	CL;F4;F5;hive	-	-	-	-	-1.83971	6.63005e-08	-1.26225	0.0157525	-1.16491	0.0355527	-	-	-	-	-2.61809	6.37278e-09	-	-	4.06167	1.47982e-15	no
882	483.328	3657.6	no	no	no	no	N-tert-Butyloxycarbonyl-deacetyl-leupeptin	C11604	no	no	-	1	C11604	C23H44N6O5	-0.000244094	0.998783	0.0259724	0.76216	0.00523066	0.952483	-0.181881	0.0367838	S	-	-	-	-	-	-	-	-	-	-	-	-	-	-	-	-	1.3938	0.0043796	-0.556976	9.08802e-07	no
883	485.181	45406.9	no	no	no	yes	Rutaevin	C08779	yes	no	-	2	C08779; C11608	C26H30O9	0.320616	0.311233	-1.16672	0.0340284	-0.4162	0.224216	-3.58235	0.00184146	hive	-	-	-	-	-	-	-	-	-	-	-	-	-	-	-1.46508	0.0194931	-	-	3.98778	1.37278e-09	yes
884	485.291	6161.98	no	no	no	no	Hydrocortisone cypionate	C08176	no	no	-	1	C08176	C29H42O6	0.0170063	0.896961	0.390215	0.00153847	0.230512	0.0114712	0.199427	0.141216	CL;F5;G;S	-	-	-	-	1.10772	0.00138928	-	-	1.65566	0.000160842	-	-	2.32085	6.12626e-08	-	-	1.07621	0.00628337	1.18014	6.50764e-07	no
885	487.101	22291.8	no	no	no	yes	CDP-choline	C00307	yes	no	Pyrimidine Nucleotides	1	C00307	C14H26N4O11P2	-0.140364	0.0574231	-0.257376	0.000921485	-0.21802	2.35707e-05	-0.436024	0.000706301	CL;F4;hive	-	-	-	-	-1.10316	0.00086085	-1.59964	0.000159373	-	-	-	-	-	-	-1.76104	2.37498e-05	-	-	2.70714	1.09211e-13	yes
886	487.156	60498.2	no	no	no	yes	O-(1->4)-alpha-L-Dihydrostreptosyl-streptidine 6-phosphate	C04767	yes	no	-	1	C04767	C14H29N6O11P	0.0743264	0.394341	-0.0724153	0.520257	-0.0222029	0.763286	-0.380739	0.00635163	F4;hive	-	-	-	-	-	-	-1.53713	0.0178274	-	-	-	-	-	-	-1.44629	0.032995	-	-	3.6519	2.62702e-16	yes
887	487.343	5855.69	no	no	no	yes	Asiatic acid	C08617	yes	no	-	4	C08617; C17538; C17841; C17890	C30H48O5	-0.502426	0.0551445	-0.768894	0.00366678	-0.673261	0.000165806	-1.01917	0.000833053	B;CL;F4;hive	-	-	-1.37086	0.0435938	-1.53109	0.000295506	-1.45545	0.0246677	-	-	-	-	-	-	-1.87748	0.000941832	-	-	2.47506	5.80543e-11	yes
888	489.219	12489.7	no	no	no	no	Glimepiride	C07669	no	no	Benzenesulfonamides	1	C07669	C24H34N4O5S	-0.00821116	0.94939	0.0407038	0.610453	0.0105519	0.881562	-0.392214	0.0111986	F4;G;hive	-	-	-	-	-	-	-1.61491	0.000167158	-	-	-	-	2.10305	4.81009e-07	-1.13406	0.0240891	-	-	3.81755	5.51569e-09	no
889	489.993	9828.22	no	no	no	no	dATP	C00131	no	no	Purine Nucleotides	1	C00131	C10H16N5O12P3	0.210701	0.547913	-0.290444	0.380354	-0.118153	0.619425	-0.841184	0.0166058		-	-	-	-	-	-	-	-	-	-	-	-	-	-	-	-	-	-	1.96805	0.00108769	no
890	491.081	10784.3	yes	substrate	no	yes	Carmine	C11254	no	no	Acenes	1	C11254	C22H20O13	-0.9461	6.89408e-07	-0.554017	0.000968396	-0.705748	9.62317e-08	-0.612012	0.00109357	CL;Fp;G;hive	-	-	-	-	-1.33115	0.000217026	-	-	-	-	-1.19993	0.00387518	-1.2491	0.0235955	-1.44318	0.00436841	-	-	2.57023	7.92808e-14	no
891	491.193	9866.67	no	no	no	yes	Palmatoside G	C17507	yes	no	-	1	C17507	C25H32O10	-0.157516	0.256819	-0.0813422	0.488605	-0.115889	0.154275	-0.900705	1.28253e-05	F4;hive	-	-	-	-	-	-	-1.50643	0.00352627	-	-	-	-	-	-	-2.09882	9.55545e-06	-	-	3.86765	1.42453e-14	yes
892	491.267	10831.6	no	no	no	no	Mucronine B	C10010	no	no	-	1	C10010	C28H36N4O4	-0.36376	0.018183	-0.296886	0.000385633	-0.327836	7.42687e-06	-0.323769	0.0397396	CL;F4;hive	-	-	-	-	-1.16025	0.000243449	-2.55726	5.10348e-10	-	-	-	-	-	-	-1.25399	0.00495039	-	-	1.88798	4.26876e-09	yes
893	491.483	1751.53	no	no	no	no	Tritriacontane-16,18-dione	C08394	no	no	-	1	C08394	C33H64O2	-1.65766	0.00159397	-0.677182	0.0156959	-1.01657	1.88318e-05	-0.591994	0.11633	F4	-	-	-	-	-	-	-1.32505	0.0201888	-	-	-	-	-	-	-	-	-	-	3.05322	1.11218e-05	no
894	492.156	9129.1	no	no	no	yes	Aspoxicillin	C13269	yes	no	-	1	C13269	C21H27N5O7S	-0.35938	0.0245822	-0.333032	0.00411839	-0.350435	5.38122e-05	-0.798484	1.11837e-05	CL;hive	-	-	-	-	-1.15428	0.00314719	-	-	-	-	-	-	-	-	-2.38013	4.41244e-07	-	-	4.46171	2.14109e-12	yes
895	492.316	4686.94	yes	substrate	no	yes	Tiamulin	C12065	no	no	-	1	C12065	C28H47NO4S	-0.757113	0.0016827	-0.533205	0.000298737	-0.627538	9.56089e-07	-0.482595	0.00146671	A1;B;CL;F4;hive	1.46081	0.000439322	-1.14708	0.0130739	-1.23372	6.44878e-05	-1.4095	0.000792822	-	-	-	-	-	-	-1.13521	0.0146877	-	-	-1.00441	7.59166e-12	no
896	493.209	8420.51	no	no	no	yes	Glaucarubinone	C08763	no	no	-	2	C08763; C08784	C25H34O10	-0.179613	0.218305	-0.119075	0.303385	-0.147837	0.0688327	-0.850646	2.16594e-05	F4;hive	-	-	-	-	-	-	-1.61421	0.00143424	-	-	-	-	-	-	-2.01417	2.68206e-05	-	-	4.46288	7.20633e-16	no
897	495.253	7086.27	no	no	no	yes	Leukotriene D4	C05951	no	no	Peptides	1	C05951	C25H40N2O6S	0.200988	0.217337	0.304778	0.00932198	0.241096	0.0268157	0.546816	0.000358252	B;CL;F4;G;hive	-	-	2.00501	1.59369e-06	0.850471	0.0276619	-1.29068	0.00542972	-	-	-	-	1.76316	2.9561e-05	1.66624	9.19023e-05	-	-	3.26295	3.92026e-11	no
898	495.478	1606.93	yes	substrate	no	no	Corynomycolic acid	C16793	no	no	-	1	C16793	C32H64O3	-1.3003	9.83608e-05	-0.493612	0.000571867	-0.835913	5.64613e-06	0.274646	0.398776	A1;Fp	1.20831	0.0414588	-	-	-	-	-	-	-	-	0.991809	0.0429385	-	-	-	-	-	-	0.947701	4.67565e-08	no
899	496.202	13878.3	no	no	no	yes	Validamycin A	C12112	no	no	Glycosyl Compounds	1	C12112	C20H35NO13	-0.182785	0.100722	-0.113745	0.179088	-0.147673	0.0250079	-0.457437	9.54027e-05	G;hive	-	-	-	-	-	-	-	-	-	-	-	-	1.66987	0.000774334	-1.65021	0.000935289	-	-	4.69318	1.12323e-11	no
900	498.289	5249.62	no	no	no	no	Taurodeoxycholate	C05463	no	no	Steroids and Steroid Derivatives	3	C05463; C05465; C16868	C26H45NO6S	0.150285	0.377559	0.450728	0.00140489	0.311209	0.00424644	1.09779	0.0325697	CL;G;hive	-	-	-	-	0.921762	0.0111414	-	-	-	-	-	-	1.68869	6.49745e-05	2.866	4.41247e-11	-	-	0.325272	0.0030786	no
901	499.29	13646.2	no	no	no	no	Mupirocin	C11758	no	no	Fatty Acids and Conjugates	1	C11758	C26H44O9	0.256707	0.227731	0.666156	0.00114101	0.487392	0.000564938	1.19599	0.0452015	CL;G;hive	-	-	-	-	1.13011	0.00189074	-	-	-	-	-	-	1.82124	5.62869e-05	2.4862	2.72171e-08	-	-	1.50707	1.19367e-06	no
902	501.145	21552.1	yes	substrate	no	yes	alpha-L-Rhamnopyranosyl-(1->2)-beta-D-galactopyranosyl-(1->2)-beta-D-glucur...	C12082	yes	no	-	1	C12082	C18H30O16	-0.875529	1.59402e-05	-0.776469	3.92536e-06	-0.819928	5.39041e-11	-0.832668	2.49239e-05	B;CL;G;hive;S	-	-	-1.46337	1.74183e-05	-1.35577	1.39595e-07	-	-	-	-	-	-	1.46268	1.75976e-05	-1.42842	2.90915e-05	0.715452	0.0409681	4.96344	2.61056e-11	yes
903	501.233	15580.2	no	no	no	no	Eriojaposide A	C17888	no	no	-	1	C17888	C24H38O11	-0.152592	0.346429	0.186452	0.1119	0.0306481	0.77441	0.118969	0.317871	F4;G;S	-	-	-	-	-	-	-1.54057	0.00556611	-	-	-	-	2.00144	8.4426e-05	-	-	1.05288	0.0424175	3.69336	4.94149e-10	no
904	502.302	11816.7	no	no	no	no	Pederin	C15760	no	no	-	1	C15760	C25H45NO9	-0.223889	0.241314	0.0738104	0.638232	-0.0389899	0.737124	0.328944	0.0809333	F4	-	-	-	-	-	-	-1.56879	0.010329	-	-	-	-	-	-	-	-	-	-	-0.202967	0.0308758	no
905	503.078	19643.8	yes	substrate	no	no	Hypericin	C07606	yes	no	Phenanthrenes and Derivatives	1	C07606	C30H16O8	-0.25558	0.000190922	-0.248763	3.21556e-05	-0.248563	7.78614e-09	-0.279136	0.130429	CL;hive	-	-	-	-	-1.61163	0.000143252	-	-	-	-	-	-	-	-	-1.79004	0.00228893	-	-	3.76216	7.11305e-20	yes
906	503.162	1.19106e+06	no	no	no	no	Raffinose	C00492	yes	no	Trisaccharides	13	C00492; C00713; C00883; C01835; C02160; C03367; C03661; C03848; C05404; C06219; C08239; C08243; C08251	C18H32O16	-0.0118048	0.943262	-0.508684	0.000663419	-0.342072	0.00628721	1.29048	0.173426	hive	-	-	-	-	-	-	-	-	-	-	-	-	-	-	2.37619	5.95e-06	-	-	3.36617	3.61216e-15	yes
907	505.208	10266.7	no	no	no	no	Limonoate	C01593	yes	no	-	1	C01593	C26H34O10	-0.0978783	0.433685	-0.0622439	0.625269	-0.0894294	0.34132	0.146789	0.216284	F4;G	-	-	-	-	-	-	-1.52355	0.00525144	-	-	-	-	2.05868	3.51351e-05	-	-	-	-	5.10841	3.22172e-11	yes
908	505.988	31563	no	no	no	no	ATP	C00002	no	no	Purine Nucleotides	3	C00002; C00286; C19969	C10H16N5O13P3	0.162582	0.815288	-0.557599	0.319936	-0.321139	0.433814	-1.68055	0.0173332		-	-	-	-	-	-	-	-	-	-	-	-	-	-	-	-	-	-	4.19595	0.0388646	yes
909	508.475	2129.12	yes	substrate	no	no	N-(Tetradecanoyl)-sphing-4-enine	C13916	no	no	Sphingolipids	1	C13916	C32H63NO3	-1.64976	0.000674893	-0.989937	4.60323e-05	-1.26355	2.52898e-07	-0.122224	0.689813	A1;CL;F4;F5;S	1.25851	0.0059928	-	-	-1.0792	0.00110819	-1.15886	0.0158726	-1.05871	0.0393011	-	-	-	-	-	-	1.14087	0.00160574	1.38021	9.81513e-12	no
910	509.091	9035.39	yes	substrate	no	yes	2-O-[2-O-(alpha-D-Mannopyranosyl)-alpha-D-glucopyranosyl]-3-phospho-D-glyce...	C19793	no	no	-	1	C19793	C15H27O17P	-0.409002	0.00015512	-0.341645	7.44497e-05	-0.37047	1.06764e-08	-0.446513	0.000913288	CL;F4;hive	-	-	-	-	-1.67955	2.97427e-07	-1.31286	0.00647053	-	-	-	-	-	-	-2.12024	8.51823e-07	-	-	2.7882	9.61812e-11	no
911	509.208	8146.69	no	no	no	yes	GW 409544	C15623	yes	no	-	1	C15623	C31H30N2O5	-0.219689	0.0601477	-0.185123	0.0669807	-0.202211	0.00314743	-0.640133	4.2255e-05	F4;hive	-	-	-	-	-	-	-1.85496	7.56285e-05	-	-	-	-	-	-	-2.08598	6.27291e-06	-	-	3.80429	1.84551e-12	yes
912	510.161	23388.7	no	no	no	yes	Hygromycin A	C17579	no	no	-	1	C17579	C23H29NO12	-0.153114	0.145747	-0.164238	0.069033	-0.164954	0.00908813	-0.492694	4.12026e-05	hive	-	-	-	-	-	-	-	-	-	-	-	-	-	-	-2.02579	0.00022627	-	-	3.59477	1.23018e-14	no
913	512.249	6315.59	yes	product	no	yes	DAMGO	C11318	no	no	-	1	C11318	C26H35N5O6	0.554791	0.00964221	0.65396	5.47805e-07	0.600411	4.90969e-08	1.97615	0.002335	B;CL;G;hive	-	-	0.64566	0.00800544	0.743792	6.10475e-06	-	-	-	-	-	-	0.638131	0.00922223	3.80588	1.53221e-11	-	-	2.64894	5.2173e-10	no
914	513.285	5818.72	no	no	no	no	Cucurbitacin I	C08800	no	no	-	2	C08800; C12148	C30H42O7	0.040222	0.705044	0.258059	0.0024183	0.164061	0.0157149	0.229309	0.0945338	CL;F4;G;S	-	-	-	-	1.0649	0.00293064	-1.46537	0.00151114	-	-	-	-	2.3085	9.94399e-08	-	-	0.911473	0.0426045	0.305631	0.00727346	no
915	515.194	11930.7	no	no	no	no	Harrisonin	C08766	no	no	-	2	C08766; C09551	C27H32O10	-0.00503426	0.951779	0.104355	0.150437	0.0564171	0.306293	-0.0130633	0.907899	F4;G	-	-	-	-	-	-	-1.45719	0.0334732	-	-	-	-	1.48564	0.0277659	-	-	-	-	3.77683	2.12135e-13	no
916	517.283	16495.3	no	no	no	no	Sativanine B	C10013	yes	no	-	1	C10013	C30H38N4O4	0.0235076	0.909259	-0.0389971	0.814146	0.00694611	0.967212	-0.353976	0.0304204	A1;B;F4;F5	-1.54149	0.000764804	-1.51224	0.00103656	-	-	-1.73921	9.05193e-05	1.44911	0.0019744	-	-	-	-	-	-	-	-	2.47642	1.15818e-09	yes
917	517.317	5246.82	no	no	no	no	Cucurbitacin F	C08798	no	no	-	2	C08798; C08803	C30H46O7	-0.272338	0.0150015	-1.6098	0.0266223	-1.23656	0.0184843	-1.71985	0.0199883	B;CL;F4;F5;Fp;hive;S	-	-	-1.61165	0.0225594	-1.54427	0.00119111	-1.7893	0.00689144	-1.4942	0.0463928	-1.51587	0.00483736	-	-	-1.59954	0.0243603	-1.39289	0.0135155	1.40038	1.17554e-08	no
918	517.375	1718.61	yes	substrate	no	yes	13-beta-D-Glucosyloxydocosanoate	C04103	no	no	-	1	C04103	C28H54O8	-1.25299	2.75479e-05	-0.685272	0.000319381	-0.895136	1.78168e-08	-0.942875	3.33716e-05	B;CL;F4;hive;S	-	-	-0.912948	0.0296834	-0.971118	0.000337371	-1.16937	0.0014029	-	-	-	-	-	-	-1.2323	0.000612829	1.73859	1.46899e-09	3.13608	1.90565e-05	no
919	519.258	7683.29	no	no	no	no	7beta-Hydroxytaxusin	C20153	no	no	-	1	C20153	C28H40O9	-0.231253	0.0318026	0.041242	0.600742	-0.0765542	0.277349	-0.135112	0.209749	F4;G;S	-	-	-	-	-	-	-1.87794	3.38604e-06	-	-	-	-	1.85743	4.38435e-06	-	-	1.07474	0.00298289	3.46885	1.05753e-09	no
920	519.297	9731.09	no	no	no	no	Cyasterone	C08816	yes	no	-	2	C08816; C11300	C29H44O8	-0.254281	0.0106012	-0.0280453	0.82472	-0.114747	0.170578	-0.249128	0.0403865	F4	-	-	-	-	-	-	-1.5721	0.0271086	-	-	-	-	-	-	-	-	-	-	2.49342	2.77569e-10	yes
921	519.33	3920.99	no	no	no	yes	Cucurbitacin P	C08804	no	no	-	1	C08804	C30H48O7	-0.612535	0.000103012	-0.677454	0.0159934	-0.643298	0.000708263	-0.824046	0.00673623	B;CL;F4;Fp;hive	-	-	-1.54566	0.0187001	-1.51801	0.000603708	-2.254	6.66918e-05	-	-	-1.22036	0.0289143	-	-	-1.76274	0.00385526	-	-	1.27699	4.27334e-13	no
922	521.984	7391.01	no	no	no	no	GTP	C00044	no	no	Purine Nucleotides	2	C00044; C19967	C10H16N5O14P3	0.0269674	0.951623	-0.699546	0.276111	-0.461019	0.27727	-1.28507	0.0825249		-	-	-	-	-	-	-	-	-	-	-	-	-	-	-	-	-	-	2.77334	0.0261082	yes
923	523.219	8136.8	no	no	no	yes	Mascaroside	C09132	yes	no	Prenol Lipids	1	C09132	C26H36O11	-0.118245	0.350617	0.00875416	0.926413	-0.0486949	0.52242	-0.346971	0.00358756	F4;G	-	-	-	-	-	-	-1.71552	0.00076201	-	-	-	-	1.68851	0.000981025	-	-	-	-	3.91009	1.23332e-12	yes
924	526.179	8205.87	no	no	no	yes	4-O-(beta-L-Arabinofuranosyl-(1->2)-beta-L-arabinofuranosyl-(1->2)-beta-L-a...	C20705	no	no	-	1	C20705	C20H33NO15	-0.0135946	0.87556	-0.0933819	0.178447	-0.0696837	0.194537	-0.658205	7.30133e-07	F4;G;hive	-	-	-	-	-	-	-1.35474	0.00288296	-	-	-	-	1.07301	0.0412655	-2.66159	4.66755e-10	-	-	3.6021	2.49748e-12	no
925	527.176	8719.58	no	no	no	yes	Deoxyloganic acid tetraacetate	C11647	no	no	Prenol Lipids	1	C11647	C24H32O13	0.180677	0.423228	0.00975818	0.907562	0.066623	0.480233	-0.503642	0.000355791	hive	-	-	-	-	-	-	-	-	-	-	-	-	-	-	-2.00938	0.000108839	-	-	3.61149	6.76584e-13	no
926	529.207	48498.2	no	no	no	no	Gomisin D	C17816	yes	no	-	1	C17816	C28H34O10	-1.132	0.0786197	0.0883426	0.9037	-0.688945	0.191508	-3.39027	0.0183484	G	-	-	-	-	-	-	-	-	-	-	-	-	1.9559	0.00112808	-	-	-	-	3.87503	2.60169e-08	yes
927	530.192	9190.87	no	no	no	yes	Phaseolotoxin	C08440	no	no	-	1	C08440	C15H34N9O8PS	-0.567391	0.017033	-0.26893	0.0651828	-0.419646	0.00429649	-0.947949	2.72417e-05	G;hive	-	-	-	-	-	-	-	-	-	-	-	-	1.50216	0.00609844	-1.85164	0.00025609	-	-	2.81537	5.67604e-11	no
928	531.116	9902.79	no	no	no	yes	Biochanin A 7-O-(6-O-malonyl-beta-D-glucoside)	C12625	no	no	Flavonoids	3	C12625; C16197; C16231	C25H24O13	-0.306372	0.00378203	-0.143842	0.111755	-0.207285	0.00112786	-0.552213	2.78697e-05	hive	-	-	-	-	-	-	-	-	-	-	-	-	-	-	-2.10394	3.26e-05	-	-	4.35606	3.69678e-13	no
929	533.093	15162.1	no	no	no	yes	Luteolin 7-O-(6''-malonylglucoside)	C10103	yes	no	Flavonoids	1	C10103	C24H22O14	0.365397	0.0431712	0.304857	0.0631845	0.323319	0.00424644	-0.845145	0.000134836	hive	-	-	-	-	-	-	-	-	-	-	-	-	-	-	-1.80451	0.000588199	-	-	8.25858	9.53936e-09	yes
930	533.146	13452.3	no	no	no	yes	Cercosporin	C10309	yes	no	-	1	C10309	C29H26O10	-0.193409	0.0283902	-0.136232	0.0712759	-0.160735	0.00231097	-0.344607	0.00422683	F4;hive	-	-	-	-	-	-	-1.44043	0.0147018	-	-	-	-	-	-	-1.70891	0.00160676	-	-	3.89487	9.93508e-12	yes
931	533.208	10344.4	no	no	no	yes	N-Demethyl-desepoxymaytansinol	C20136	no	no	-	1	C20136	C27H35ClN2O7	-0.121338	0.160188	-0.114055	0.162463	-0.125017	0.0423826	-0.392389	0.000186686	F4;Fp	-	-	-	-	-	-	1.7885	1.50706e-05	-	-	2.11427	8.35627e-10	-	-	-	-	-	-	4.35132	6.35987e-13	no
932	533.277	11073.2	no	no	no	no	Helveticoside	C08869	no	no	-	2	C08869; C17525	C29H42O9	0.378119	0.00017744	0.269625	0.0692617	0.32094	0.0105322	0.0138981	0.954091	A1	-1.83557	0.000420468	-	-	-	-	-	-	-	-	-	-	-	-	-	-	-	-	1.2013	1.01895e-06	no
933	533.315	8693.13	yes	substrate	no	yes	Integerrenine	C10005	no	no	-	1	C10005	C31H42N4O4	-0.931677	2.72599e-05	-0.650601	0.00171736	-0.757719	3.44422e-07	-0.835344	0.000428954	A1;B;CL;hive;S	1.27853	0.00226283	1.45448	0.000289136	-0.95166	0.00307683	-	-	-	-	-	-	-	-	-1.1524	0.00888394	0.979669	0.00604602	1.48272	8.73703e-09	no
934	535.218	5911.23	no	no	no	no	Quassimarin	C08777	no	no	Prenol Lipids	1	C08777	C27H36O11	-0.114055	0.162325	0.046505	0.563584	-0.0264347	0.689248	-0.240032	0.056961	G	-	-	-	-	-	-	-	-	-	-	-	-	1.97403	6.87e-05	-	-	-	-	3.88882	3.98481e-12	no
935	540.054	147658	no	no	no	no	Cyclic ADP-ribose	C13050	no	no	-	1	C13050	C15H21N5O13P2	0.596169	0.0258259	-0.0152136	0.956369	0.193602	0.330037	-0.218991	0.430209		-	-	-	-	-	-	-	-	-	-	-	-	-	-	-	-	-	-	2.55843	0.00401444	yes
936	540.287	5509.26	no	no	no	no	Psychosine sulfate	C02744	no	no	Sphingolipids	1	C02744	C24H47NO10S	-0.147126	0.237466	0.0498319	0.618899	-0.03777	0.637166	-0.258688	0.0265347	F4;G	-	-	-	-	-	-	-2.04641	2.24443e-05	-	-	-	-	1.54627	0.00298102	-	-	-	-	1.31889	1.62267e-09	no
937	541.026	18591.7	yes	substrate	no	yes	Cefonicid	C06882	no	no	Lactams	1	C06882	C18H18N6O8S3	-0.280838	0.00127042	-0.363425	3.33087e-05	-0.327728	7.1827e-07	-0.601055	6.65366e-07	CL;Fp;G;hive	-	-	-	-	-1.49619	2.00283e-07	-	-	-	-	-1.60714	2.51061e-07	-2.07704	4.3706e-08	-2.28932	2.3098e-09	-	-	0.958717	0.000125776	no
938	542.156	11352.8	yes	substrate	no	yes	Patent blue	C13725	yes	no	-	1	C13725	C27H31N2O6S2.	-0.892964	6.15999e-05	-1.18802	7.12284e-06	-1.08285	9.557e-11	-1.8185	8.90463e-07	B;CL;F4;hive	-	-	-1.71975	2.20507e-07	-1.69241	9.13821e-11	-1.10043	0.00206239	-	-	-	-	-	-	-2.16111	2.2233e-10	-	-	6.09998	3.87242e-11	yes
939	544.111	15476	no	no	no	yes	dTDP-L-epivancosamine	C12321	no	no	-	2	C12321; C12322	C17H29N3O13P2	-0.169229	0.022289	-0.186364	0.00935904	-0.183389	0.000126769	-0.431493	1.7228e-05	CL;F4;hive	-	-	-	-	-1.05145	0.031876	-1.32445	0.04715	-	-	-	-	-	-	-2.24294	2.20318e-05	-	-	1.82051	1.22224e-07	no
940	544.188	294218	no	no	no	yes	alpha-D-Galactosyl-N-acetyllactosamine	C04428	no	no	-	2	C04428; C04847	C20H35NO16	-0.0325971	0.686468	-0.117757	0.061136	-0.0912583	0.061242	-0.562192	2.49506e-05	hive	-	-	-	-	-	-	-	-	-	-	-	-	-	-	-2.54189	5.51e-08	-	-	1.57127	1.83254e-06	no
941	545.332	14585.9	no	no	no	yes	3-O-alpha-Mycarosylerythronolide B	C06630	yes	no	-	1	C06630	C28H50O10	-0.155824	0.512829	0.245722	0.307228	0.0428627	0.814338	-1.18358	0.00121251	G	-	-	-	-	-	-	-	-	-	-	-	-	2.25416	5.96e-06	-	-	-	-	3.47588	9.01242e-05	yes
942	547.292	8434.78	no	no	no	yes	Cymarin	C08859	no	no	-	1	C08859	C30H44O9	-0.275382	0.0993769	-0.17613	0.109384	-0.221816	0.00980899	-0.68027	0.000353174	F4;hive	-	-	-	-	-	-	-1.69449	0.00011941	-	-	-	-	-	-	-1.77361	4.89822e-05	-	-	2.04704	2.87745e-08	no
943	549.088	40871.9	no	no	no	no	Quercetin 3-O-(6-O-malonyl-beta-D-glucoside)	C12638	yes	no	Flavonoids	1	C12638	C24H22O15	-0.00501362	0.974807	-0.118963	0.637115	-0.0786212	0.631542	-0.392097	0.0752722		-	-	-	-	-	-	-	-	-	-	-	-	-	-	-	-	-	-	9.33367	5.35946e-09	yes
944	549.182	10679.1	no	no	no	yes	Genipin 1-beta-gentiobioside	C16965	yes	no	-	1	C16965	C23H34O15	-1.75005	0.00707315	0.12243	0.745435	-0.664478	0.0505079	-1.21087	5.76182e-05		-	-	-	-	-	-	-	-	-	-	-	-	-	-	-	-	-	-	4.96155	1.99426e-09	yes
945	551.268	6119.39	no	no	no	no	Canthiumine	C10000	no	no	-	1	C10000	C33H36N4O4	0.0616976	0.512829	0.135018	0.0700483	0.0949672	0.150617	0.168175	0.182331	F4;G	-	-	-	-	-	-	-1.72248	0.000313303	-	-	-	-	2.08419	6.8031e-06	-	-	-	-	1.35833	1.26015e-08	no
946	551.323	11974.5	no	no	no	yes	Pandamine	C10012	no	no	-	1	C10012	C31H44N4O5	-0.615853	0.00212356	-0.351658	0.0524187	-0.449708	0.00036109	-1.72477	2.08517e-05	F4;hive;S	-	-	-	-	-	-	-1.24162	0.0127177	-	-	-	-	-	-	-1.99132	4.01369e-06	0.911897	0.0410612	2.4166	3.26795e-06	no
947	552.133	7678.36	no	no	no	no	OA-6129 C	C20814	no	no	-	1	C20814	C20H31N3O11S2	-0.234473	0.0116565	-0.16738	0.0863657	-0.195718	0.00319956	0.337682	0.200635	F4;hive	-	-	-	-	-	-	-1.52669	0.0169699	-	-	-	-	-	-	1.42753	0.0335193	-	-	3.42582	1.25185e-14	no
948	553.245	15130.2	no	no	no	yes	Toonacilin	C08785	yes	no	-	1	C08785	C31H38O9	-0.429899	0.0326325	-0.404469	0.00522383	-0.423959	0.000108365	-1.37593	1.25224e-06	CL;F4;hive	-	-	-	-	-0.906287	0.0218546	-2.05439	2.3476e-06	-	-	-	-	-	-	-2.27862	1.6363e-07	-	-	4.84466	5.89807e-12	yes
949	554.205	4720.75	no	no	no	yes	Desmethyldescarbamoylnovobiocin	C12475	no	no	-	2	C12475; C20689	C29H33NO10	-0.0232431	0.882976	0.0796146	0.384146	0.0323354	0.667414	-0.443329	0.000240421	F4;G;hive	-	-	-	-	-	-	-1.28913	0.0375231	-	-	-	-	1.53532	0.00548514	-1.53595	0.00545605	-	-	3.91392	2.56931e-12	no
950	554.268	5221.18	no	no	no	no	Butirosin A	C17585	no	no	-	3	C17585; C17586; C17997	C21H41N5O12	-0.00597477	0.96428	0.071775	0.412601	0.0282195	0.725442	-0.0479366	0.714994	F4;G	-	-	-	-	-	-	-1.79127	0.000149136	-	-	-	-	2.08956	6.12564e-06	-	-	-	-	1.65305	1.04934e-07	no
951	555.294	5966.63	no	no	no	yes	Cucurbitacin E	C08797	no	no	-	1	C08797	C32H44O8	-0.36341	0.0231763	-0.260087	0.036855	-0.309766	0.00143568	-0.502669	0.00251486	F4;hive;S	-	-	-	-	-	-	-1.77954	1.62335e-05	-	-	-	-	-	-	-1.12016	0.0224127	1.23956	0.000416919	1.28078	1.53851e-11	no
952	558.064	19156.1	no	no	no	no	ADP-ribose	C00301	no	no	Purine Nucleotides	3	C00301; C01882; C02741	C15H23N5O14P2	0.127235	0.0921437	0.467015	0.0185047	0.365824	0.00903169	0.0617819	0.595693	CL	-	-	-	-	1.53885	0.000402974	-	-	-	-	-	-	-	-	-	-	-	-	2.34816	2.12777e-11	no
953	559.218	11019.3	no	no	no	yes	Labriformidin	C08870	yes	no	-	1	C08870	C29H36O11	-0.219707	0.230174	0.0545024	0.757321	-0.054146	0.660523	-1.46401	2.65906e-05	F4;hive	-	-	-	-	-	-	-1.44253	0.012141	-	-	-	-	-	-	-1.98173	9.93781e-05	-	-	5.17014	6.04436e-13	yes
954	560.106	8011.55	yes	substrate	no	yes	dTDP-4-amino-4,6-dideoxy-5-C-methyl-L-mannose	C11461	no	no	-	1	C11461	C17H29N3O14P2	-0.345263	0.000170735	-0.264454	0.00510246	-0.299827	4.97226e-06	-0.539972	2.65906e-05	CL;hive	-	-	-	-	-1.31552	0.00214169	-	-	-	-	-	-	-	-	-2.4523	2.78975e-06	-	-	3.1745	7.045e-15	no
955	561.155	22037.9	no	no	no	no	Albanol A	C08738	yes	no	-	1	C08738	C34H26O8	-0.104683	0.328291	-0.100452	0.252369	-0.106601	0.0895688	0.224597	0.209601	F4	-	-	-	-	-	-	-1.51377	0.0355195	-	-	-	-	-	-	-	-	-	-	4.04262	7.45975e-13	yes
956	561.161	16496.5	no	no	no	yes	Flavonol 3-O-beta-D-glucosyl-(1->2)-beta-D-glucoside	C15581	yes	no	-	1	C15581	C27H30O13	-0.0821403	0.387717	-0.0592464	0.541972	-0.0718612	0.268419	0.357839	0.00949529	F4;hive	-	-	-	-	-	-	-1.5317	0.0155137	-	-	-	-	-	-	1.81613	0.00174245	-	-	3.94602	1.78383e-11	yes
957	561.234	21312.2	no	no	no	yes	Eriocarpin	C08865	yes	no	-	1	C08865	C29H38O11	-0.210724	0.37876	-0.0612318	0.770871	-0.119317	0.414969	-2.32378	3.34933e-05	hive	-	-	-	-	-	-	-	-	-	-	-	-	-	-	-1.97235	9.51e-05	-	-	5.49917	1.79944e-12	yes
958	561.252	8476.22	no	no	no	yes	Protoporphyrin	C02191	no	no	Tetrapyrroles and Derivatives	1	C02191	C34H34N4O4	-0.0641472	0.715807	0.0231058	0.85073	-0.0254712	0.799914	-0.593275	0.00141969	F4;G;hive	-	-	-	-	-	-	-1.4811	0.00677656	-	-	-	-	1.34071	0.0211315	-1.38452	0.0149737	-	-	3.15175	4.23035e-12	no
959	561.29	8930.73	no	no	no	no	Atractyloside D	C17861	no	no	-	1	C17861	C27H46O12	-0.0199883	0.924679	0.0847108	0.386725	0.0275845	0.778044	-0.0241106	0.869645	F4;G	-	-	-	-	-	-	-1.34697	0.00262077	-	-	-	-	2.6563	3.32254e-10	-	-	-	-	1.41691	1.81854e-08	no
960	563.068	16206.3	no	no	no	no	dTDP-glucose	C00842	yes	no	Pyrimidine Nucleotides	2	C00842; C02097	C16H26N2O16P2	0.0907034	0.165915	0.0403135	0.556767	0.0540836	0.262769	-0.114859	0.377157		-	-	-	-	-	-	-	-	-	-	-	-	-	-	-	-	-	-	2.36711	3.98825e-12	yes
961	563.141	21139.1	no	no	no	yes	Apigenin 7-O-[beta-D-apiosyl-(1->2)-beta-D-glucoside]	C04858	yes	no	Flavonoids	5	C04858; C10110; C10181; C16491; C16803	C26H28O14	1.28886	0.169593	-0.915817	3.00543e-06	0.487976	0.47095	-1.19555	6.04874e-07	Fp	-	-	-	-	-	-	-	-	-	-	2.19018	4.69e-08	-	-	-	-	-	-	4.53477	1.76843e-09	yes
962	563.286	8976.02	no	no	no	yes	Musaroside	C08875	no	no	-	2	C08875; C08884	C30H44O10	-0.10393	0.424211	0.0613187	0.529322	-0.019678	0.817371	-0.373739	0.00723336	F4;G;hive	-	-	-	-	-	-	-1.33044	0.0144244	-	-	-	-	1.80668	0.000164695	-1.20251	0.0400382	-	-	1.94071	7.859e-11	yes
963	564.349	2951.91	no	no	no	no	JSTX-3	C13931	no	no	-	1	C13931	C27H47N7O6	-0.260697	0.00691953	-0.088888	0.284835	-0.163384	0.0135848	-0.00824376	0.974982	F4	-	-	-	-	-	-	-1.86062	0.000558507	-	-	-	-	-	-	-	-	-	-	0.865217	4.4978e-09	no
964	565.047	48241.9	no	no	no	no	UDP-glucose	C00029	yes	no	Pyrimidine Nucleotides	3	C00029; C00052; C03733	C15H24N2O17P2	1.1449	0.0239311	0.238975	0.177327	0.571493	0.00306722	-0.301774	0.181387		-	-	-	-	-	-	-	-	-	-	-	-	-	-	-	-	-	-	2.74381	1.66152e-11	yes
965	566.281	5011.31	no	no	no	no	3'-Deoxydihydrostreptomycin	C03755	no	no	-	1	C03755	C21H41N7O11	-0.0290175	0.84079	0.0143563	0.868975	-0.0164288	0.841785	-0.102381	0.265126	F4;G	-	-	-	-	-	-	-1.71647	0.000144581	-	-	-	-	2.03465	4.06332e-06	-	-	-	-	1.77752	2.85388e-09	no
966	571.98	3962.13	yes	substrate	no	no	Cefotetan disodium	C14007	no	no	-	1	C14007	C17H15N7O8S4.	-0.169593	0.00634923	-0.129509	0.00474038	-0.145873	2.18381e-05	-0.160691	0.0724748		-	-	-	-	-	-	-	-	-	-	-	-	-	-	-	-	-	-	1.5589	4.52728e-11	no
967	572.22	7264.65	no	no	no	yes	MET-enkephalin	C11684	no	no	-	1	C11684	C27H35N5O7S	-0.621131	0.0166035	-0.736146	0.00908977	-0.703409	0.000181228	-1.22707	0.000766475	F5;hive	-	-	-	-	-	-	-	-	1.48883	0.0149603	-	-	-	-	-1.38613	0.0312863	-	-	4.22516	7.33868e-09	no
968	573.307	15300.9	no	no	no	yes	Cucurbitacin A	C08793	yes	no	-	1	C08793	C32H46O9	-0.873379	0.0200268	-0.620863	0.0149324	-0.700505	0.000316618	-1.69788	0.000109481	CL;F4;hive;S	-	-	-	-	-0.855179	0.0454019	-1.53711	0.00103809	-	-	-	-	-	-	-1.69159	0.00020669	0.943884	0.0383212	3.85789	1.48522e-11	yes
969	574.121	7117.22	no	no	no	no	dTDP-D-mycaminose	C11933	no	no	-	3	C11933; C19948; C20766	C18H31N3O14P2	-0.0310973	0.781782	-0.0446937	0.570781	-0.0475136	0.454451	0.324038	0.010069	G;hive	-	-	-	-	-	-	-	-	-	-	-	-	2.06597	2.2591e-05	1.65102	0.00132369	-	-	3.35748	1.97457e-12	no
970	575.256	7823.71	no	no	no	no	Tiliacorine	C09667	yes	no	Alkaloids	1	C09667	C36H36N2O5	-0.224716	0.160661	-0.245534	0.0315707	-0.24777	0.00602829	-0.250806	0.0418751	F4;G	-	-	-	-	-	-	-1.26828	0.0349821	-	-	-	-	1.57082	0.00293538	-	-	-	-	2.8226	1.42896e-09	yes
971	575.322	17171	no	no	no	yes	Cerberin	C19984	yes	no	-	2	C19984; C19987	C32H48O9	-0.817439	0.0228852	-0.518542	0.0345253	-0.611897	0.00107802	-1.88067	9.87037e-05	A1;F4;hive;S	1.13671	0.0282071	-	-	-	-	-1.3282	0.00476503	-	-	-	-	-	-	-1.66312	0.000135593	1.00916	0.0128315	4.04177	1.92967e-08	yes
972	576.076	5186.96	no	no	no	yes	5-(5-Phospho-D-ribosylaminoformimino)-1-(5-phosphoribosyl)-imidazole-4-carb...	C04896	no	no	Imidazole Nucleosides and Nucleotides	2	C04896; C04916	C15H25N5O15P2	-0.267521	0.0390741	-0.213421	0.00367503	-0.236558	5.63076e-05	-0.466264	6.62808e-06	CL;F4;hive	-	-	-	-	-1.0234	0.0150049	-1.39066	0.0102857	-	-	-	-	-	-	-2.05531	1.67374e-05	-	-	2.91024	5.1447e-11	no
973	577.156	6843.14	yes	substrate	no	yes	Violanthin	C10196	yes	no	Flavonoids	5	C10196; C12627; C12628; C16802; C16981	C27H30O14	-0.360523	0.0031837	-0.534806	0.000223877	-0.478605	1.94976e-06	-0.632669	0.000340938	CL;F4;hive	-	-	-	-	-1.27858	0.000180833	-1.14653	0.033397	-	-	-	-	-	-	-1.46544	0.00174036	-	-	4.88804	2.01038e-11	yes
974	579.026	11218.8	no	no	no	yes	UDP-glucuronate	C00167	no	no	Pyrimidine Nucleotides	3	C00167; C00617; C02330	C15H22N2O18P2	0.13261	0.39989	-0.0862219	0.270514	-0.00943681	0.893542	-0.569942	8.9632e-05	G;hive	-	-	-	-	-	-	-	-	-	-	-	-	-1.61167	0.00198947	-2.24394	3.82224e-06	-	-	1.79024	1.2367e-10	no
975	579.134	28758.5	no	no	no	yes	Carlinoside	C10026	no	no	Flavonoids	2	C10026; C10109	C26H28O15	0.0625957	0.883175	0.151561	0.169708	0.0745663	0.720384	-0.846836	1.86643e-05	Fp	-	-	-	-	-	-	-	-	-	-	2.03843	6.15e-07	-	-	-	-	-	-	6.21903	5.70972e-10	no
976	579.173	8731.17	yes	substrate	no	yes	Naringin	C09789	yes	no	Flavonoids	5	C09789; C09793; C10307; C16423; C16799	C27H32O14	-0.513104	2.14628e-05	-0.564519	1.62295e-06	-0.548419	7.00108e-12	-0.876183	1.11837e-05	CL;hive	-	-	-	-	-1.6881	8.55385e-10	-	-	-	-	-	-	-	-	-2.37296	1.02376e-10	-	-	5.90976	3.76046e-09	yes
977	579.462	1516.83	yes	substrate	no	no	Giganin	C08488	no	no	-	1	C08488	C35H64O6	-1.48368	0.00112741	-0.849684	7.10687e-05	-1.10508	4.4021e-07	-0.682169	0.0121134	CL;F4;F5;hive;S	-	-	-	-	-1.23555	8.19542e-05	-1.27734	0.00411697	-1.18792	0.0102319	-	-	-	-	-1.04589	0.0386639	0.929835	0.0182	1.44299	3.43405e-09	no
978	582.261	59915.1	yes	substrate	yes	yes	N1,N5,N10-Tricoumaroyl spermidine	C18069	yes	no	-	1	C18069	C34H37N3O6	-3.45974	0.00483594	-3.45631	0.00112579	-3.4641	3.61894e-06	-4.22139	0.000790591	CL	-	-	-	-	-1.21727	0.0203537	-	-	-	-	-	-	-	-	-	-	-	-	5.58116	1.77714e-08	yes
979	584.167	7372.71	no	no	no	yes	SN38 glucuronide carboxylate form	C11375	no	no	-	1	C11375	C28H29N2O12	0.0675889	0.645056	0.0685262	0.428388	0.0612008	0.389755	-0.634718	1.29749e-05	G;hive	-	-	-	-	-	-	-	-	-	-	-	-	1.76211	0.000449303	-1.79322	0.000332699	-	-	3.9299	1.69562e-15	no
980	589.52	6015.56	no	no	no	yes	Coixenolide	C17566	yes	no	-	1	C17566	C38H70O4	-2.56545	0.000109981	-1.262	0.0312632	-1.68732	4.3815e-05	-2.81943	0.00316761	hive	-	-	-	-	-	-	-	-	-	-	-	-	-	-	-1.47896	0.031224	-	-	5.63346	0.000698662	yes
981	593.151	1.06518e+06	yes	substrate	yes	yes	Scolymoside	C03870	no	MS/MS fragementation	Flavonoids	8	C03870; C04024; C04199; C08064; C10195; C10513; C12630; C17600	C27H30O15	-4.57171	3.95083e-05	-3.76962	7.16955e-05	-4.12997	3.06423e-08	-5.0469	4.79106e-05	A1;CL;F5;Fp;G;hive;S	1.10852	0.00230282	-	-	-1.17521	4.73733e-06	-	-	-1.18597	0.000827408	0.824396	0.00887574	1.16539	0.00109042	-1.22984	0.000455207	0.856576	0.00551533	10.2118	5.82038e-07	no
982	593.332	57808.7	no	no	no	yes	13-Deoxytedanolide	C16861	yes	no	-	1	C16861	C32H50O10	-0.451492	0.0786197	-0.252863	0.265702	-0.321196	0.0398987	-2.85438	4.12026e-05	F4;Fp;hive;S	-	-	-	-	-	-	-1.1409	0.033795	-	-	0.926635	0.0386731	-	-	-1.69591	0.000143142	1.0785	0.00763226	5.55643	2.41781e-07	yes
983	595.13	21185.1	yes	substrate	no	no	Quercetin 3-O-[beta-D-xylosyl-(1->2)-beta-D-glucoside]	C12637	yes	no	-	1	C12637	C26H28O16	-1.64012	9.25614e-05	-0.601858	0.00114734	-1.02595	3.68662e-06	-0.506619	0.213174	CL;F5	-	-	-	-	-1.03364	0.00715944	-	-	-1.75271	0.000141321	-	-	-	-	-	-	-	-	9.08912	6.05089e-09	yes
984	595.283	20088.6	yes	substrate	no	no	Berbamunine	C05177	no	no	Alkaloids	3	C05177; C06511; C06515	C36H40N2O6	-0.761178	0.00155787	-0.46144	0.0055901	-0.590409	2.01726e-05	0.178138	0.142739	A1;CL;F4	1.14438	0.0431643	-	-	-0.933901	0.021945	-1.65871	0.000362541	-	-	-	-	-	-	-	-	-	-	2.4761	1.07002e-08	no
985	597.181	5979.67	yes	substrate	no	yes	Geniposide pentaacetate	C11639	no	no	-	1	C11639	C27H34O15	-0.301181	0.00966463	-0.30223	0.00411459	-0.312201	6.9218e-05	-0.718589	1.23418e-05	CL;F4;hive	-	-	-	-	-0.992711	0.00805515	-1.17331	0.0261067	-	-	-	-	-	-	-2.06055	2.30664e-06	-	-	4.83383	2.43649e-13	no
986	601.356	5631.01	no	no	no	no	Garcinol	C09929	no	no	Prenol Lipids	2	C09929; C09979	C38H50O6	0.00888497	0.969211	0.0766761	0.570781	0.0199214	0.893056	0.0526446	0.757448	F4;G	-	-	-	-	-	-	-1.35051	0.00323755	-	-	-	-	2.65761	5.80062e-10	-	-	-	-	3.34323	4.84396e-09	no
987	603.178	7189.98	no	no	no	no	Aldotetraouronic acid	C20573	yes	no	-	1	C20573	C22H36O19	0.0313214	0.824732	-0.139477	0.164344	-0.0838009	0.324659	0.130671	0.476493		-	-	-	-	-	-	-	-	-	-	-	-	-	-	-	-	-	-	4.52136	2.12128e-12	yes
988	603.247	6998.99	no	no	no	yes	N-Demethyl-desepoxyansamitocin P-3	C20137	no	no	-	1	C20137	C31H41ClN2O8	-0.4148	0.00835598	-0.216975	0.0750279	-0.307504	0.00187861	-0.565566	0.00605622	F4;G;hive	-	-	-	-	-	-	-1.68644	0.000289251	-	-	-	-	1.70803	0.00023073	-1.27912	0.0147033	-	-	2.65343	4.81716e-12	no
989	603.291	7914.08	no	no	no	no	Dilazep dihydrochloride	C12954	no	no	-	1	C12954	C31H44N2O10.	0.883014	0.203289	1.10727	0.00262119	0.996822	0.00150726	-0.154465	0.292592	CL	-	-	-	-	1.89771	3.82e-07	-	-	-	-	-	-	-	-	-	-	-	-	2.34172	4.91283e-09	no
990	604.069	9680.35	no	no	no	no	GDP-mannose	C00096	no	no	Purine Nucleotides	5	C00096; C00394; C01581; C02280; C15925	C16H25N5O16P2	0.254984	0.0300504	0.20412	0.00517925	0.226291	0.000103052	0.175001	0.181467	CL	-	-	-	-	1.21823	0.00589616	-	-	-	-	-	-	-	-	-	-	-	-	2.51126	3.71682e-16	no
991	605.231	11833.9	no	no	no	yes	Cancentrine	C09370	no	no	-	1	C09370	C36H34N2O7	0.0654117	0.748406	0.22217	0.173986	0.174501	0.139793	-1.82133	2.79817e-06	B;hive	-	-	-1.29257	0.0170519	-	-	-	-	-	-	-	-	-	-	-2.54029	3.94547e-08	-	-	5.28605	2.05996e-09	no
992	606.074	97401	no	no	no	no	UDP-N-acetyl-alpha-D-glucosamine	C00043	no	no	Pyrimidine Nucleotides	3	C00043; C00203; C01170	C17H27N3O17P2	0.245752	0.113878	0.242595	0.0332904	0.242979	0.00360333	0.180269	0.499197		-	-	-	-	-	-	-	-	-	-	-	-	-	-	-	-	-	-	1.89524	3.2556e-11	yes
993	607.167	10408	yes	substrate	no	yes	Diosmin	C10039	yes	no	Flavonoids	4	C10039; C10382; C17834; C17837	C28H32O15	-0.886505	1.66551e-06	-0.69116	4.70256e-05	-0.779916	7.48785e-09	-1.38939	5.41746e-07	CL;G;hive	-	-	-	-	-1.12528	0.000860537	-	-	-	-	-	-	1.07377	0.0436531	-1.82777	1.63785e-05	-	-	5.4588	1.40126e-10	yes
994	607.282	7555.22	no	no	no	yes	Berbamine	C09357	yes	no	Alkaloids	5	C09357; C09458; C09598; C09615; C09659	C37H40N2O6	-0.0502262	0.769442	0.236542	0.0697249	0.118456	0.223007	-0.484076	0.00352856	F4;G	-	-	-	-	-	-	-1.63104	0.00254744	-	-	-	-	1.29534	0.0371416	-	-	-	-	2.67411	1.79227e-10	yes
995	609.146	400700	yes	substrate	yes	yes	Rutin	C05625	yes	no	Flavonoids	6	C05625; C10102; C12634; C16490; C17563; C19796	C27H30O16	-3.87066	1.31941e-05	-2.70155	4.79039e-06	-3.12871	8.02807e-10	-4.53412	2.25402e-06	B;CL;F5;hive	-	-	1.02805	0.00247456	-1.54643	2.67718e-10	-	-	-1.65107	1.48283e-07	-	-	-	-	-1.74847	2.92935e-08	-	-	11.1931	1.56414e-13	yes
996	609.303	9268.8	no	no	no	no	BQ 123	C11587	yes	no	-	1	C11587	C31H42N6O7	-0.212585	0.243839	-0.069018	0.654884	-0.136029	0.222109	-0.359658	0.0491952		-	-	-	-	-	-	-	-	-	-	-	-	-	-	-	-	-	-	3.40338	4.88584e-10	yes
997	613.176	5435.78	no	no	no	yes	Leiocarposide	C10805	no	no	-	1	C10805	C27H34O16	-0.266887	0.00465113	-0.23628	0.0230768	-0.254848	0.000330475	-0.626881	4.61162e-05	hive	-	-	-	-	-	-	-	-	-	-	-	-	-	-	-2.07535	2.25e-05	-	-	4.51404	6.08636e-10	no
998	620.02	7946.27	no	no	no	no	ADP-ribose 1'',2''-phosphate	C19851	no	no	-	2	C19851; C20742	C15H22N5O16P3	0.133675	0.712563	-0.179457	0.561466	-0.0680087	0.755687	-0.79323	0.0189712		-	-	-	-	-	-	-	-	-	-	-	-	-	-	-	-	-	-	2.88472	0.0230509	no
999	625.141	277547	yes	substrate	yes	yes	Quercetin 3-O-beta-D-glucosyl-(1->2)-beta-D-glucoside	C12667	yes	no	Flavonoids	1	C12667	C27H30O17	-3.32902	3.27819e-06	-3.06585	4.38321e-05	-3.16468	1.05111e-09	-2.56002	0.000681735	B;CL;F5;hive	-	-	1.02731	0.0140592	-1.62128	4.61088e-09	-	-	-1.68636	2.85807e-06	-	-	-	-	-1.52894	2.58166e-05	-	-	10.898	5.04923e-10	yes
1000	625.265	6942.33	no	no	no	yes	Red chlorophyll catabolite	C18022	no	no	-	1	C18022	C35H38N4O7	0.134754	0.439027	0.26615	0.0616334	0.207008	0.0454577	-0.527892	0.00265673	F4;G;hive	-	-	-	-	-	-	-1.37087	0.0200728	-	-	-	-	1.46241	0.00976207	-1.26578	0.043533	-	-	3.55279	9.9604e-12	no
1001	626.128	28203.6	yes	substrate	yes	yes	Delphinidin 3-O-(6-caffeoyl-beta-D-glucoside)	C16367	yes	no	Flavonoids	1	C16367	C30H27O15	-2.10633	3.43004e-07	-1.94639	2.29888e-05	-2.00703	2.34829e-10	-1.91066	0.000680339	CL;F5;hive	-	-	-	-	-1.67688	3.24422e-08	-	-	-1.73437	1.43438e-05	-	-	-	-	-1.66215	3.5361e-05	-	-	6.95136	2.09202e-10	yes
1002	629.095	10049.2	yes	substrate	no	no	Prebetanin	C08567	no	no	Betalains	1	C08567	C24H26N2O16S	-0.34925	0.00170247	-0.30922	0.000251158	-0.325908	9.02829e-08	-0.281841	0.02992	CL;hive;S	-	-	-	-	-1.43095	7.67426e-05	-	-	-	-	-	-	-	-	-1.31626	0.0162461	0.995371	0.0384527	2.84656	2.84977e-15	no
1003	630.245	33969.6	yes	substrate	yes	yes	N1,N5,N10-Tricaffeoyl spermidine	C18070	yes	no	-	1	C18070	C34H37N3O9	-3.14484	0.00562859	-3.08151	0.0010359	-3.12682	4.47367e-06	-3.82445	0.000681735	CL;F5;hive	-	-	-	-	-1.45688	0.00012263	-	-	-1.50466	0.00549622	-	-	-	-	-1.53543	0.0042171	-	-	6.35018	6.05089e-09	yes
1004	631.366	14364.2	no	no	no	no	Geissospermine	C09200	no	no	-	1	C09200	C40H48N4O3	-0.412692	0.0801623	-0.107702	0.613715	-0.250456	0.108937	0.274574	0.371439	F4;G	-	-	-	-	-	-	-1.42674	0.0155994	-	-	-	-	1.99507	0.000108631	-	-	-	-	4.6777	9.07789e-07	no
1005	633.126	14246.7	yes	substrate	no	yes	Actinorhodin	C06691	yes	no	-	1	C06691	C32H26O14	-0.433962	0.00142465	-0.459125	9.37657e-05	-0.457064	8.47153e-08	-0.66133	2.94848e-06	CL;F5;hive	-	-	-	-	-1.55553	6.89298e-07	-	-	-1.16267	0.0159653	-	-	-	-	-2.09843	3.51352e-07	-	-	4.647	2.38523e-09	yes
1006	637.236	6949.05	yes	product	no	no	Kanokoside C	C17430	yes	no	-	1	C17430	C27H42O17	1.40947	0.00108127	0.908275	9.05897e-05	1.10671	2.18042e-05	-0.518099	0.0167214	CL	-	-	-	-	2.04193	8.4e-11	-	-	-	-	-	-	-	-	-	-	-	-	3.4982	3.36746e-11	yes
1007	638.03	4819.07	no	no	no	yes	ADPribose 2'-phosphate	C03246	no	no	Purine Nucleotides	1	C03246	C15H24N5O17P3	0.49374	0.000476896	0.135421	0.0250206	0.264487	9.28056e-05	-0.198129	0.00851615		-	-	-	-	-	-	-	-	-	-	-	-	-	-	-	-	-	-	2.54429	3.69678e-13	no
1008	638.17	6470.97	yes	substrate	no	yes	CMP-pseudaminic acid	C20083	no	no	-	2	C20083; C20419	C22H34N5O15P	-0.473176	0.000681404	-0.480067	0.0008789	-0.494873	9.36388e-06	-1.0933	3.10484e-06	CL;F5;hive	-	-	-	-	-0.99719	0.00928258	-	-	-1.24963	0.0160243	-	-	-	-	-1.87178	2.89303e-05	-	-	6.10765	7.25566e-11	no
1009	638.26	5621.99	yes	product	no	no	Demethyl-desacetyl-rifamycin S	C14724	no	no	-	1	C14724	C34H41NO11	0.905907	0.00321036	0.5823	6.79245e-05	0.699743	6.12463e-05	-0.315058	0.072383	CL;G	-	-	-	-	1.77791	4.75803e-08	-	-	-	-	-	-	1.18187	0.0195238	-	-	-	-	2.26785	7.19399e-15	no
1010	645.365	7106.2	no	no	no	no	Abrusoside A	C08920	no	no	-	1	C08920	C36H54O10	1.69946	0.0228441	2.55982	4.40682e-05	2.23732	6.37226e-07	2.31272	0.0102099	CL;F5;hive	-	-	-	-	2.17993	1.53574e-11	-	-	1.55555	1.61668e-06	-	-	-	-	1.76671	5.51196e-08	-	-	2.74585	4.10028e-08	no
1011	649.613	6530.29	no	no	no	no	2S,3R-Didecanoyl-docosane-2,3-diol	C13822	no	no	-	1	C13822	C42H82O4	-1.42094	0.00851676	-0.129972	0.446072	-0.766638	0.0117127	0.5901	0.365848	A1;G	1.91067	0.000199846	-	-	-	-	-	-	-	-	-	-	1.39979	0.0171354	-	-	-	-	0.60848	0.028129	no
1012	650.281	13437.2	yes	product	yes	no	17alpha-(N-Acetyl-D-glucosaminyl)-estradiol 3-D-glucuronoside	C04806	yes	no	-	1	C04806	C32H45NO13	2.86063	0.000681404	2.08095	4.26824e-05	2.41273	3.57852e-06	-0.322416	0.0725644	CL;F5	-	-	-	-	2.33871	1.53574e-11	-	-	1.05554	0.00682618	-	-	-	-	-	-	-	-	4.45744	1.75882e-08	yes
1013	652.215	5157.01	no	no	no	yes	Bromocriptine	C06856	no	no	-	1	C06856	C32H40BrN5O5	-0.107548	0.365979	-0.0545523	0.572175	-0.0944755	0.322223	-0.573936	0.000269967	F4;hive	-	-	-	-	-	-	-1.74373	0.00119969	-	-	-	-	-	-	-1.99069	0.000124689	-	-	4.12399	6.7407e-13	no
1014	652.313	11390.2	yes	product	yes	no	A 80987	C15661	no	no	-	1	C15661	C37H43N5O6	3.05481	0.000841822	2.44936	4.57755e-05	2.70646	3.98888e-06	0.174646	0.29791	CL;F5	-	-	-	-	2.36624	1.53501e-11	-	-	1.002	0.0122088	-	-	-	-	-	-	-	-	3.44534	7.95785e-10	no
1015	655.15	5439.07	yes	substrate	no	yes	Teniposide	C11153	no	no	Lignan Lactones	1	C11153	C32H32O13S	-0.566551	2.81704e-05	-0.411466	0.00112579	-0.473345	2.05977e-07	-0.831518	1.11837e-05	CL;hive	-	-	-	-	-1.36615	0.000177537	-	-	-	-	-	-	-	-	-2.41177	2.32301e-07	-	-	4.5102	1.70294e-07	no
1016	655.315	5402.83	no	no	no	no	N3'-Acetylneomycin	C02725	no	no	-	1	C02725	C25H48N6O14	0.265175	0.187888	0.440304	0.000139899	0.357764	0.000374812	0.177582	0.156751	CL;F4;G	-	-	-	-	1.41958	4.26864e-06	-1.44362	0.000680113	-	-	-	-	1.99507	8.36119e-07	-	-	-	-	3.08161	1.20276e-10	no
1017	657.415	2978.75	no	no	no	no	Fucoxanthin	C08596	no	no	Prenol Lipids	1	C08596	C42H58O6	-0.575832	0.00324331	-0.123406	0.505085	-0.331862	0.0226892	0.794868	0.0153683	F4;G;hive	-	-	-	-	-	-	-1.18916	0.0362034	-	-	-	-	1.47902	0.00291373	1.81495	9.98057e-05	-	-	1.96931	1.53275e-10	no
1018	658.416	3370.38	no	no	no	yes	Argiotoxin 659	C13929	no	no	-	2	C13929; C20095	C31H53N11O5	-0.267509	0.523994	0.521674	0.0187744	0.158164	0.470583	1.04988	0.000733189	G;hive	-	-	-	-	-	-	-	-	-	-	-	-	2.04753	1.53676e-05	1.87292	9.52743e-05	-	-	2.29331	0.000598241	no
1019	663.374	7221.8	no	no	no	yes	Phytolaccoside B	C08968	no	no	-	1	C08968	C36H56O11	-0.450543	0.032711	-0.410673	0.0164467	-0.426184	0.000313517	2.12209	0.000277775	F4;hive	-	-	-	-	-	-	-0.664838	0.000621957	-	-	-	-	-	-	3.62381	1.53221e-11	-	-	3.64641	2.37649e-13	no
1020	665.214	117480	no	no	no	no	Glycogen	C00182	yes	no	Tetrasaccharides	8	C00182; C01613; C02013; C02052; C03989; C04861; C08242; C08248	C24H42O21	-0.0510008	0.870943	-0.391097	0.109968	-0.270509	0.130854	0.817869	0.158584	hive	-	-	-	-	-	-	-	-	-	-	-	-	-	-	1.91115	0.000631235	-	-	8.07402	4.74327e-09	yes
1021	669.42	2944.24	no	no	no	no	Monensin	C06693	no	no	-	1	C06693	C36H62O11	-0.227842	0.181299	0.0746425	0.641645	-0.0711355	0.579474	-0.0789088	0.657702	F4;G;S	-	-	-	-	-	-	-1.41427	0.0209325	-	-	-	-	1.51036	0.0101041	-	-	1.32423	0.00466735	2.60786	1.67039e-10	no
1022	672.292	8478.29	no	no	no	yes	N1,N5,N10-Triferuloyl spermidine	C18071	no	no	-	1	C18071	C37H43N3O9	0.0374802	0.812798	0.0692533	0.694362	0.0438588	0.720384	-1.14994	0.000220156	hive	-	-	-	-	-	-	-	-	-	-	-	-	-	-	-1.62214	0.00237903	-	-	3.99192	6.2244e-07	no
1023	673.481	2814.39	yes	substrate	no	no	1-Hexadecanoyl-2-(9Z-octadecenoyl)-sn-glycero-3-phosphate	C13889	no	no	-	1	C13889	C37H71O8P	-0.760454	0.00038247	-0.432959	0.00250507	-0.55775	7.98438e-07	-0.385313	0.0104379	CL;F4	-	-	-	-	-0.994458	0.01563	-1.26701	0.0218016	-	-	-	-	-	-	-	-	-	-	1.88333	4.84801e-10	no
1024	674.318	6010.64	no	no	no	no	Jesaconitine	C08692	no	no	Alkaloids	1	C08692	C35H49NO12	-0.029332	0.885774	0.192475	0.0679834	0.0787308	0.492631	0.0296786	0.830224	F4;G	-	-	-	-	-	-	-1.2669	0.00428775	-	-	-	-	2.61106	2.55726e-10	-	-	-	-	3.23512	5.51569e-09	no
1025	680.4	2812.31	no	no	no	no	Mycinamicin III	C15681	no	no	-	1	C15681	C36H59NO11	-0.05829	0.717482	0.0302094	0.804427	-0.0275916	0.805266	0.273456	0.0242139	F4;G	-	-	-	-	-	-	-1.38346	0.0353154	-	-	-	-	1.73224	0.00255492	-	-	-	-	2.58512	5.33936e-09	no
1026	686.032	5183.05	no	no	no	no	UDP-N-acetyl-D-galactosamine 4-sulfate	C04426	no	no	Pyrimidine Nucleotides	1	C04426	C17H27N3O20P2S	0.0786426	0.210253	0.0393438	0.402909	0.0524	0.138881	-0.000366213	0.994324	F4	-	-	-	-	-	-	-1.53028	0.0427112	-	-	-	-	-	-	-	-	-	-	2.86181	1.15912e-14	no
1027	691.332	7006.82	no	no	no	no	Scillaren A	C08879	no	no	-	1	C08879	C36H52O13	-0.109141	0.602456	-0.135642	0.422882	-0.148661	0.313207	-0.0467201	0.803253	F4;G	-	-	-	-	-	-	-1.39215	0.0132645	-	-	-	-	2.18925	6.89464e-06	-	-	-	-	3.47533	1.55419e-09	no
1028	694.175	6647.62	no	no	no	yes	Dexylosylbenanomicin A	C06787	no	no	-	1	C06787	C34H33NO15	-0.179795	0.0686989	-0.255578	0.00610088	-0.233356	0.00026416	-0.542157	0.000244172	CL;hive	-	-	-	-	-1.0889	0.0147135	-	-	-	-	-	-	-	-	-2.10107	3.74711e-05	-	-	4.03577	8.1331e-10	no
1029	694.288	5082.63	yes	product	no	yes	Rifamycin S	C14540	no	no	-	1	C14540	C37H45NO12	0.707222	0.00387524	0.764505	8.4829e-07	0.729819	5.16628e-09	0.550815	0.000165044	CL;G;hive	-	-	-	-	2.21418	1.5418e-11	-	-	-	-	-	-	1.10704	0.00467954	1.47312	4.01363e-05	-	-	2.64347	3.69678e-13	no
1030	696.301	4859.03	no	no	no	no	Rifamycin	C12044	no	no	-	1	C12044	C37H47NO12	0.0122791	0.951779	0.133111	0.382254	0.0707658	0.557378	-0.28963	0.0818924	F4;G	-	-	-	-	-	-	-1.32574	0.0325769	-	-	-	-	1.56113	0.00522899	-	-	-	-	3.03853	4.75171e-11	no
1031	699.35	5503.21	no	no	no	yes	Septentriodine	C08668	no	no	Alkaloids	1	C08668	C37H52N2O11	-0.0967478	0.6446	-0.0195679	0.885422	-0.08071	0.576192	0.613271	0.00960746	F4;G;hive	-	-	-	-	-	-	-1.42697	0.000704801	-	-	-	-	2.32452	9.06114e-09	1.60076	9.17598e-05	-	-	3.38368	9.19354e-11	no
1032	700.527	3673.64	yes	substrate	no	no	1-Hexadecanoyl-2-(9Z-octadecenoyl)-sn-glycero-3-phosphonoethanolamine	C13878	no	no	-	1	C13878	C39H76NO7P	-1.07803	0.000311942	-0.617419	0.00823609	-0.771748	8.15761e-06	-0.336158	0.215925	CL;F4;F5;G	-	-	-	-	-0.857329	0.0298851	-1.2114	0.0140752	-1.29344	0.00647169	-	-	1.8598	1.32751e-05	-	-	-	-	2.10243	1.27128e-10	no
1033	701.283	4183.35	no	no	no	no	Taccalonolide A	C08635	no	no	-	1	C08635	C36H46O14	-0.0117602	0.943125	-0.0892059	0.380852	-0.0696575	0.402646	-0.293497	0.0110036		-	-	-	-	-	-	-	-	-	-	-	-	-	-	-	-	-	-	2.96596	2.39331e-11	no
1034	701.291	4124.12	no	no	no	no	Bisibuthiamine	C12750	no	no	-	1	C12750	C32H46N8O6S2	0.238746	0.107763	0.119147	0.199074	0.152892	0.0873767	-0.20033	0.101511	F4;G	-	-	-	-	-	-	-1.40399	0.0269072	-	-	-	-	1.89379	0.000525206	-	-	-	-	3.08934	4.69234e-12	no
1035	716.522	28425.3	yes	substrate	no	no	1-Hexadecanoyl-2-(9Z-octadecenoyl)-sn-glycero-3-phosphoethanolamine	C13877	no	no	-	1	C13877	C39H76NO8P	-1.80326	1.57301e-06	-1.01566	0.000773433	-1.27646	3.64893e-08	-0.198476	0.634086	CL	-	-	-	-	-1.09098	0.0175647	-	-	-	-	-	-	-	-	-	-	-	-	1.40455	2.08951e-06	no
1036	726.409	3755.36	no	no	no	yes	Mycinamicin II	C15680	no	no	-	1	C15680	C37H61NO13	-0.0828781	0.620264	-0.125931	0.306317	-0.121485	0.215962	0.49895	0.00124258	F4;G;hive	-	-	-	-	-	-	-1.75065	0.000170171	-	-	-	-	1.47628	0.00268654	1.47052	0.00283814	-	-	3.84118	1.7241e-07	no
1037	734.232	4833.11	no	no	no	no	Anthemis glycoside B	C08327	no	no	-	1	C08327	C34H41NO17	0.159957	0.11194	0.0639926	0.501037	0.0917562	0.201047	-0.277677	0.0322326		-	-	-	-	-	-	-	-	-	-	-	-	-	-	-	-	-	-	3.10623	1.02552e-08	no
1038	739.208	13968.9	yes	substrate	no	yes	Robinin	C10178	yes	no	Flavonoids	1	C10178	C33H40O19	-2.22251	1.88601e-05	-1.50249	3.26281e-06	-1.78513	7.16688e-10	-2.49514	1.0161e-06	CL;F5;G;hive	-	-	-	-	-1.22118	2.13129e-06	-	-	-1.36024	7.93925e-05	-	-	1.36534	7.37949e-05	-1.55253	4.71521e-06	-	-	5.47656	8.24852e-10	yes
1039	743.453	3799.73	no	no	no	no	(3S,2'S)-4-Ketomyxol 2'-alpha-L-fucoside	C15942	no	no	-	1	C15942	C46H64O8	-0.0121244	0.946918	-0.0919311	0.535953	-0.0771265	0.51936	0.0138489	0.926933	F4;G	-	-	-	-	-	-	-1.87191	0.000190014	-	-	-	-	1.78073	0.000456764	-	-	-	-	3.00739	3.53801e-17	no
1040	747.518	7306.46	no	no	no	no	1-Hexadecanoyl-2-(9Z-octadecenoyl)-sn-glycero-3-phospho-sn-glycerol	C13883	no	no	-	1	C13883	C40H77O10P	-0.280854	0.0341015	-0.317131	0.00372609	-0.303035	0.000129332	-0.311257	0.0287737	B;CL	-	-	-1.77252	0.00489399	-1.12867	0.0355866	-	-	-	-	-	-	-	-	-	-	-	-	0.368144	0.039226	no
1041	749.448	2395.38	no	no	no	yes	alpha-Hederin	C08954	no	no	-	1	C08954	C41H66O12	-0.539011	0.0199623	-0.0692482	0.616042	-0.268328	0.035183	1.58228	0.00845253	hive;S	-	-	-	-	-	-	-	-	-	-	-	-	-	-	3.25403	1.53396e-11	0.78631	0.0215964	2.87076	7.34872e-10	no
1042	752.291	4153.42	no	no	no	no	Rifamycin O	C01849	no	no	-	1	C01849	C39H47NO14	0.209235	0.1285	0.0647558	0.459624	0.107828	0.238065	-0.181989	0.16844	F4;G	-	-	-	-	-	-	-1.46737	0.013575	-	-	-	-	1.91677	0.000300217	-	-	-	-	3.68354	7.23448e-11	no
1043	753.481	4558.96	no	no	no	no	Chikusetsusaponin Ia	C17544	no	no	Prenol Lipids	1	C17544	C41H70O12	-0.133559	0.036178	-0.0538237	0.341386	-0.083921	0.0343976	-0.0100764	0.847148	B;F4	-	-	-1.49034	0.0184593	-	-	-1.91347	0.000647935	-	-	-	-	-	-	-	-	-	-	-0.0383101	0.444275	no
1044	759.577	2997.94	yes	substrate	no	no	1-Hexadecanoyl-2-(9Z-octadecenoyl)-sn-glycero-3-phosphocholine	C13875	no	no	-	1	C13875	C42H83NO8P	-1.05684	2.75802e-05	-0.52588	0.000885626	-0.730875	1.11529e-07	-0.375144	0.103343	A1;CL;F4	1.51812	0.00124371	-	-	-0.938618	0.0181769	-1.19153	0.0260631	-	-	-	-	-	-	-	-	-	-	2.27091	8.86792e-09	no
1045	760.512	4896.69	yes	substrate	no	no	1-Hexadecanoyl-2-(9Z-octadecenoyl)-sn-glycero-3-phosphoserine	C13880	no	no	-	1	C13880	C40H76NO10P	-1.15031	3.77988e-05	-0.731467	0.000278644	-0.880808	1.00429e-08	-0.213978	0.494087	A1;CL;F5	1.21918	0.0479365	-	-	-1.14519	0.00488881	-	-	-1.24853	0.0387314	-	-	-	-	-	-	-	-	1.54467	1.4643e-08	no
1046	764.286	3848.28	no	no	no	no	O-Phosphoviomycin	C02574	no	no	-	1	C02574	C25H44N13O13P	0.498258	0.0661795	0.734064	4.14377e-05	0.644867	2.51835e-06	-0.278898	0.0151955	CL	-	-	-	-	2.01328	3.17e-11	-	-	-	-	-	-	-	-	-	-	-	-	3.79018	1.46661e-08	no
1047	766.107	8513.97	no	no	no	yes	CoA	C00010	no	no	Purine Nucleotides	1	C00010	C21H36N7O16P3S	-0.0537952	0.574675	-0.0534643	0.492994	-0.0550839	0.315115	-0.185027	0.0064881		-	-	-	-	-	-	-	-	-	-	-	-	-	-	-	-	-	-	3.53467	2.71037e-12	no
1048	771.198	24068.3	yes	substrate	no	yes	Kaempferol 3-sophorotrioside	C12635	yes	no	Flavonoids	1	C12635	C33H40O21	-2.06532	0.000629053	-1.68555	1.62295e-06	-1.85089	5.52837e-09	-2.55028	1.78392e-07	B;CL;F4;F5;hive	-	-	-1.16559	0.00196223	-1.89143	2.52277e-11	-0.922202	0.0324447	-2.08173	4.12593e-09	-	-	-	-	-2.27614	2.38757e-10	-	-	7.41669	8.21313e-13	yes
1049	775.274	3785.08	no	no	no	yes	Sanggenon E	C17871	no	no	-	1	C17871	C45H44O12	-0.0221931	0.832345	-0.00471134	0.956369	-0.0219709	0.756864	-0.351937	0.00341925	F4;hive	-	-	-	-	-	-	-1.59759	0.00777418	-	-	-	-	-	-	-1.33784	0.0493079	-	-	3.03921	7.90003e-14	no
1050	777.34	3763.22	no	no	no	no	Bis(glutathionyl)spermine disulfide	C16564	no	no	-	1	C16564	C30H54N10O10S2	0.112929	0.548738	0.216352	0.0513459	0.155979	0.144118	-0.121108	0.354214	F4;G	-	-	-	-	-	-	-1.81521	0.000114832	-	-	-	-	1.46863	0.00356062	-	-	-	-	3.45664	1.45369e-11	no
1051	779.6	2662.06	yes	substrate	no	no	3-Demethylubiquinone-9	C03226	no	no	-	1	C03226	C53H80O4	-1.41944	2.75479e-05	-0.793462	0.000405794	-1.03802	5.60495e-08	-0.292254	0.299558	CL;F4;F5	-	-	-	-	-1.18803	0.00185145	-1.3609	0.0112399	-1.31936	0.0159302	-	-	-	-	-	-	-	-	3.06262	9.99111e-09	no
1052	782.401	4448.92	no	no	no	no	Beauvericin	C11590	no	no	-	1	C11590	C45H57N3O9	-0.168259	0.390704	-0.124754	0.379237	-0.155299	0.167291	0.400281	0.0211186	F4;G	-	-	-	-	-	-	-1.75047	0.000288402	-	-	-	-	1.19863	0.0410396	-	-	-	-	3.85055	1.55419e-09	no
1053	783.214	5914.93	yes	substrate	no	yes	6''-Feruloylspinosin	C17836	no	no	-	1	C17836	C38H40O18	-0.337939	0.00715757	-0.250398	0.00867405	-0.289518	4.53558e-05	-0.354978	0.000548755	CL;F4;hive	-	-	-	-	-1.02867	0.0278792	-1.27934	0.0467215	-	-	-	-	-	-	-1.40817	0.0184012	-	-	3.10164	7.45975e-13	no
1054	784.149	12243	no	no	no	yes	FAD	C00016	no	no	-	1	C00016	C27H33N9O15P2	-0.103397	0.57206	-0.183393	0.284835	-0.152226	0.186417	-0.642069	0.00266737	hive	-	-	-	-	-	-	-	-	-	-	-	-	-	-	-1.64212	0.0228445	-	-	3.27963	3.53186e-08	no
1055	789.392	4979.94	no	no	no	no	Nostocyclopeptide A2	C15724	no	no	-	1	C15724	C40H54N8O9	0.259944	0.211788	0.400729	0.0124096	0.33142	0.00615475	0.661483	0.163394	F4;hive	-	-	-	-	-	-	-1.38348	0.0298988	-	-	-	-	-	-	1.62254	0.00490803	-	-	4.18533	1.12685e-10	no
1056	789.499	4032.19	no	no	no	yes	all-trans-Nonaprenyl diphosphate	C04145	no	no	-	2	C04145; C17438	C45H76O7P2	0.0527089	0.831082	0.37497	0.0601275	0.223867	0.139793	-0.586244	0.00267889	G	-	-	-	-	-	-	-	-	-	-	-	-	1.42832	0.0244396	-	-	-	-	2.76116	3.91466e-10	no
1057	791.401	4541.89	no	no	no	no	3',4'-Anhydrovinblastine	C11641	no	no	Alkaloids	1	C11641	C46H56N4O8	0.416582	0.0529164	0.875041	0.0035705	0.6961	0.000307282	0.698189	0.215845	CL	-	-	-	-	1.57928	7.28e-05	-	-	-	-	-	-	-	-	-	-	-	-	4.07989	4.64515e-08	no
1058	809.413	4806.19	no	no	no	no	Vinblastine	C07201	no	no	Not Available	3	C07201; C09218; C11626	C46H58N4O9; C46H58N4O9.	0.705434	0.0437684	1.49436	3.58253e-05	1.21687	1.80819e-06	1.43167	0.0321221	CL;F5;hive	-	-	-	-	2.02256	2.36832e-11	-	-	1.06706	0.0136495	-	-	-	-	1.88922	4.01359e-07	-	-	3.65255	1.63507e-09	no
1059	835.534	16850.9	no	no	no	no	1-Hexadecanoyl-2-(9Z-octadecenoyl)-sn-glycero-3-phospho-1'-myo-inositol	C13888	no	no	-	1	C13888	C43H81O13P	-0.436614	0.00174103	-0.185023	0.0223621	-0.269275	8.04262e-05	-0.147633	0.29682	F5	-	-	-	-	-	-	-	-	-1.40744	0.0338559	-	-	-	-	-	-	-	-	2.21126	5.85715e-07	no
1060	853.331	3338	no	no	no	no	N-Acetyl-D-glucosaminyl-N-acetylmuramoyl-L-Ala-D-glutamyl-6-carboxy-L-lysine	C04876	no	no	-	1	C04876	C33H54N6O20	0.0570579	0.688636	0.0782563	0.436153	0.0593714	0.47095	-0.191436	0.138268	F4;G	-	-	-	-	-	-	-1.49569	0.0144314	-	-	-	-	1.69027	0.00315351	-	-	-	-	3.47378	8.47658e-12	no
1061	865.387	3262.03	no	no	no	no	Pristinamycin IA	C11615	no	no	-	1	C11615	C45H54N8O10	0.109076	0.569819	0.107605	0.316295	0.0915347	0.388982	0.292844	0.133202	F4;G	-	-	-	-	-	-	-1.5589	0.00513491	-	-	-	-	1.77669	0.000769866	-	-	-	-	3.67683	4.93379e-10	no
1062	893.308	5196.17	no	no	no	no	Precorrin 3B	C06406	no	no	-	1	C06406	C43H50N4O17	-0.0844514	0.593648	0.104883	0.364451	0.0313223	0.723216	0.103846	0.582928		-	-	-	-	-	-	-	-	-	-	-	-	-	-	-	-	-	-	3.62996	2.8274e-07	no
1063	893.345	3040.05	no	no	no	no	Precorrin 6X	C06320	no	no	-	1	C06320	C44H54N4O16	-0.0860026	0.479956	0.0225361	0.799862	-0.0290317	0.693873	-0.167814	0.168292	F4;G	-	-	-	-	-	-	-1.58878	0.00514987	-	-	-	-	1.3401	0.0343568	-	-	-	-	3.15061	9.19418e-15	no
1064	912.549	2281.21	no	no	no	no	Sirolimus	C07909	no	no	-	1	C07909	C51H79NO13	-0.0770298	0.428228	-0.166129	0.0651828	-0.144317	0.069025	0.201495	0.114685	F4;G	-	-	-	-	-	-	-1.29388	0.00986188	-	-	-	-	1.78206	6.67833e-05	-	-	-	-	2.5754	1.66136e-14	no
1065	915.202	6456.94	no	no	no	yes	Siroheme	C00748	no	no	-	1	C00748	C42H44FeN4O16	-0.222132	0.0821655	-0.242195	0.00366678	-0.239813	0.000316399	-0.348435	0.000706301	CL;hive	-	-	-	-	-1.19356	0.0203791	-	-	-	-	-	-	-	-	-1.65712	0.0111591	-	-	4.07349	3.11176e-12	no
1066	919.275	3744.98	no	no	no	yes	Cassiaside B2	C17674	no	no	-	1	C17674	C39H52O25	-0.1727	0.107107	-0.0512101	0.594604	-0.103186	0.125635	-0.312317	0.00474117		-	-	-	-	-	-	-	-	-	-	-	-	-	-	-	-	-	-	4.48221	5.45983e-13	no
1067	924.416	3110.92	no	no	no	no	Cyanopeptolin S	C15743	no	no	-	1	C15743	C40H63N9O14S	-0.0487535	0.797848	0.120768	0.247494	0.0298797	0.786721	0.279957	0.163737	F4;G;S	-	-	-	-	-	-	-1.46394	0.00194142	-	-	-	-	1.80563	5.16933e-05	-	-	1.10258	0.00657588	3.73352	1.39484e-09	no
1068	935.081	4266.61	no	no	no	yes	Casuarictin	C10212	no	no	-	2	C10212; C10213	C41H28O26	-0.125334	0.0283738	-0.140282	0.00345383	-0.13618	6.79641e-05	-0.329703	7.25909e-05	CL;hive	-	-	-	-	-0.965175	0.0352481	-	-	-	-	-	-	-	-	-2.12808	1.35773e-05	-	-	3.39385	5.03451e-12	no
1069	936.238	5471.65	no	no	no	yes	(S)-Hydroxydecanoyl-CoA	C05264	no	no	Fatty Acid Esters	1	C05264	C31H54N7O18P3S	-0.200425	0.152005	-0.165618	0.0562603	-0.185119	0.00773946	-0.489422	4.38848e-05	hive	-	-	-	-	-	-	-	-	-	-	-	-	-	-	-1.85152	0.000721685	-	-	4.40564	8.53651e-13	no
1070	945.541	2302.44	no	no	no	yes	Ginsenoside Re	C08944	no	no	-	3	C08944; C20725; C20736	C48H82O18	-0.0296209	0.792148	-0.0588865	0.539307	-0.0538098	0.428022	1.02474	1.59336e-07	F4;F5;G;hive	-	-	-	-	-	-	-0.954611	0.000606418	-0.678167	0.0436415	-	-	1.1766	1.07748e-05	3.08373	1.53221e-11	-	-	2.96983	1.21632e-10	no
1071	948.274	5542.26	no	no	no	no	Lauroyl-CoA	C01832	no	no	Fatty Acid Esters	1	C01832	C33H58N7O17P3S	-0.137867	0.197856	-0.0269944	0.80714	-0.0731614	0.325969	-0.232457	0.0138456		-	-	-	-	-	-	-	-	-	-	-	-	-	-	-	-	-	-	4.58789	5.20669e-13	no
1072	953.288	4845.41	no	no	no	no	Cobalt-dihydro-precorrin 6	C11543	no	no	-	1	C11543	C44H55CoN4O16	-0.112493	0.342039	-0.0793791	0.293242	-0.0991871	0.11133	-0.234456	0.0259959		-	-	-	-	-	-	-	-	-	-	-	-	-	-	-	-	-	-	4.10223	9.44931e-13	no
1073	960.166	4687.05	no	no	no	yes	3-Hydroxy-3-(3-hydroxy-4-methoxyphenyl)propionyl-CoA	C07302	no	no	-	2	C07302; C07303	C31H46N7O20P3S	-0.194776	0.0470595	-0.12503	0.116948	-0.153589	0.00706991	-0.289976	0.00870881	hive	-	-	-	-	-	-	-	-	-	-	-	-	-	-	-1.62959	0.0412526	-	-	3.74417	2.26199e-10	no
1074	966.153	5973.82	no	no	no	yes	(E,E)-Piperoyl-CoA	C02611	no	no	-	1	C02611	C33H44N7O19P3S	-0.228813	0.0551445	-0.154201	0.014847	-0.18349	0.000583216	-0.217619	0.00468309		-	-	-	-	-	-	-	-	-	-	-	-	-	-	-	-	-	-	3.27737	2.9625e-16	no
1075	976.716	2473.81	no	no	no	no	Undecaprenyl phosphate alpha-L-Ara4N	C16157	no	no	-	1	C16157	C60H100NO7P	-0.0965283	0.121221	-0.0221397	0.736639	-0.0558615	0.259211	0.00318151	0.960097		-	-	-	-	-	-	-	-	-	-	-	-	-	-	-	-	-	-	2.70124	1.04879e-08	no
1076	978.212	5084.9	no	no	no	yes	3-Hydroxy-3-(4-methylpent-3-en-1-yl)glutaryl-CoA	C04675	no	no	Carbohydrates and Carbohydrate Conjugates	1	C04675	C32H52N7O20P3S	-0.127896	0.161643	-0.171548	0.0336955	-0.158421	0.00539829	-0.399047	0.000734064	F4;hive	-	-	-	-	-	-	-1.64331	0.0124271	-	-	-	-	-	-	-1.96047	0.00117655	-	-	3.66294	5.83708e-15	no
1077	978.522	2887.44	no	no	no	no	1-Hexadecanoyl-2-(9Z-octadecenoyl)-sn-glycero-3-cytidine-5'-diphosphate	C13892	no	no	-	1	C13892	C46H83N3O15P2	-0.126785	0.544178	0.107202	0.492456	0.00229418	0.984075	0.34245	0.065384		-	-	-	-	-	-	-	-	-	-	-	-	-	-	-	-	-	-	3.31193	1.58131e-05	no
1078	981.505	2672.45	no	no	no	no	Colubrinoside	C08937	no	no	-	1	C08937	C50H78O19	0.064193	0.705767	0.101538	0.304739	0.0751107	0.399702	0.545592	0.0174713	F4;G;hive	-	-	-	-	-	-	-1.23013	0.0201545	-	-	-	-	1.64515	0.000375537	1.98541	9.1424e-06	-	-	2.77931	9.82228e-11	no
1079	994.975	3024.55	no	no	no	no	P1,P6-Bis(5'-adenosyl)hexaphosphate	C20190	no	no	Purine Nucleotides	1	C20190	C20H30N10O25P6	0.00345634	0.949082	0.0562607	0.273431	0.033885	0.346683	0.181056	0.0396419	hive	-	-	-	-	-	-	-	-	-	-	-	-	-	-	1.55757	0.0275078	-	-	2.21445	1.42876e-10	no

## Sheet: S2B Data alternative annot
ion ID	ion m/z	ionActive	ionQualTIC	ionAverageInt	mz difference	formula	ion	Score	Name	Synonym	KEGG compound
1	55.0183	1	0.771285	4947.97	0.000665333	C3H4O	-H(-)	100	Acrolein	Acrolein; Acrylaldehyde; Acrylic aldehyde; Propenal	C01471
1	55.0183	1	0.771285	4947.97	0.000665333	C3H4O	-H(-)	100	2-Propyn-1-ol	1-Hydroxy-2-propyne; 1-Propyn-3-ol; 1-Propyn-3-yl alcohol; 2-Propyn-1-ol; 2-Propynol; 2-Propynyl alcohol; 3-Hydroxy-1-propyne; 3-Propynol; Ethynylcarbinol; NA 1986; Prop-2-in-1-ol; Prop-2-yn-1-ol; Prop-2-yne-1-ol; Propargyl alcohol; Propynyl alcohol	C05986
2	57.0341	1	0.86045	17110.5	0.000534011	C3H6O	-H(-)	100	Acetone	2-Propanone; Acetone; Dimethyl ketone	C00207
2	57.0341	1	0.86045	17110.5	0.000534011	C3H6O	-H(-)	100	Propanal	Propanal; Propionaldehyde	C00479
2	57.0341	1	0.86045	17110.5	0.000534011	C3H6O	-H(-)	100	Allyl alcohol	2-Propen-1-ol; Allyl alcohol	C02001
2	57.0341	1	0.86045	17110.5	0.000534011	C3H6O	-H(-)	100	(2R)-1,2-Epoxypropane	(2R)-1,2-Epoxypropane	C11506
2	57.0341	1	0.86045	17110.5	0.000534011	C3H6O	-H(-)	100	(S)-1,2-Epoxypropane	(S)-1,2-Epoxypropane	C11507
2	57.0341	1	0.86045	17110.5	0.000534011	C3H6O	-H(-)	100	1,2-Epoxypropane	1,2-Epoxypropane; 1,2-Propylene oxide; Propylene oxide	C15508
3	58.0055	1	0.073733	1978.68	0.000534403	C2H3O2.	-H(-)	100	Potassium acetate	Potassium acetate	C12554
4	58.0294	1	0.846649	2544.16	0.000436834	C2H5NO	-H(-)	100	Acetamide	Acetamide	C06244
4	58.0294	1	0.846649	2544.16	0.000436834	C2H5NO	-H(-)	100	Aminoacetaldehyde	2-Aminoacetaldehyde; Aminoacetaldehyde	C06735
4	58.0294	1	0.846649	2544.16	0.000436834	C2H5NO	-H(-)	100	NMF	N-Methylformamide; NMF	C11489
5	59.0133	1	0.931527	42664	0.000563368	C2H4O2	-H(-)	100	Acetate	Acetate; Acetic acid; Ethanoic acid	C00033
5	59.0133	1	0.931527	42664	0.000563368	C2H4O2	-H(-)	100	Glycolaldehyde	Glycolaldehyde; Hydroxyacetaldehyde	C00266
6	59.0498	1	0.0901329	1602.56	0.000466726	C3H8O	-H(-)	100	Propan-2-ol	2-Propanol; Isopropanol; Isopropyl alcohol; Propan-2-ol	C01845
6	59.0498	1	0.0901329	1602.56	0.000466726	C3H8O	-H(-)	100	Propane-1-ol	1-Hydroxypropane; 1-Propanol; Ethylcarbinol; Optal; Osmosol extra; Propan-1-ol; Propane-1-ol; Propanol; Propyl alcohol; UN 1274; n-Propanol; n-Propyl alcohol	C05979
7	60.9929	1	0.147199	3378.53	0.000251185	H2CO3	-H(-)	100	Carbonic acid	Carbonic acid; Dihydrogen carbonate; H2CO3	C01353
8	67.0186	1	0.648198	9818.15	0.00031363	C4H4O	-H(-)	100	3-Butyn-1-al	3-Butyn-1-al	C06145
8	67.0186	1	0.648198	9818.15	0.00031363	C4H4O	-H(-)	100	Furan	Furan	C14275
9	69.0342	1	0.763217	5078.09	0.00036886	C4H6O	-H(-)	100	3-Butyn-1-ol	3-Butyn-1-ol	C06146
9	69.0342	1	0.763217	5078.09	0.00036886	C4H6O	-H(-)	100	Vinyl ether	Vinyl ether	C17721
9	69.0342	1	0.763217	5078.09	0.00036886	C4H6O	-H(-)	100	Crotonaldehyde	2-Butenal; Crotonaldehyde	C19377
9	69.0342	1	0.763217	5078.09	0.00036886	C4H6O	-H(-)	100	But-3-en-2-one	But-1-en-3-one; But-3-en-2-one; Butenone; Methyl vinyl ketone	C20701
10	70.0295	1	0.758908	2667.51	0.000318321	C3H5NO	-H(-)	100	Acrylamide	2-Propenamide; Acrylamide	C01659
11	71.0133	1	0.884911	48154.8	0.000501631	C3H4O2	-H(-)	100	Acrylic acid	2-Propenoic acid; Acrylate; Acrylic acid; Propenoate; Vinylformic acid	C00511
11	71.0133	1	0.884911	48154.8	0.000501631	C3H4O2	-H(-)	100	Methylglyoxal	2-Ketopropionaldehyde; 2-Oxopropanal; Methylglyoxal; Pyruvaldehyde; Pyruvic aldehyde	C00546
11	71.0133	1	0.884911	48154.8	0.000501631	C3H4O2	-H(-)	100	Glycidaldehyde	2-Oxiranecarboxaldehyde; Glycidaldehyde	C19246
11	71.0133	1	0.884911	48154.8	0.000501631	C3H4O2	-H(-)	100	Propiolactone	Propiolactone; beta-Propiolactone	C19297
11	71.0133	1	0.884911	48154.8	0.000501631	C3H4O2	-H(-)	100	Malonaldehyde	Malonaldehyde; Malondialdehyde	C19440
12	71.0498	1	0.85277	1583.9	0.000407701	C4H8O	-H(-)	100	Butanal	Butanal; Butyraldehyde	C01412
12	71.0498	1	0.85277	1583.9	0.000407701	C4H8O	-H(-)	100	Methyl ethyl ketone	2-Butanone; Butan-2-one; Ethyl methyl ketone; MEK; Methyl ethyl ketone	C02845
12	71.0498	1	0.85277	1583.9	0.000407701	C4H8O	-H(-)	100	1,2-Epoxybutane	1,2-Epoxybutane; 1-Butene oxide	C19237
13	72.9928	1	0.733267	4935.13	0.000340692	C2H2O3	-H(-)	100	Glyoxylate	Glyoxalate; Glyoxylate; Glyoxylic acid	C00048
14	73.029	1	0.891149	28688.9	0.000497383	C3H6O2	-H(-)	100	Propanoate	Propanoate; Propanoic acid; Propionate; Propionic acid	C00163
14	73.029	1	0.891149	28688.9	0.000497383	C3H6O2	-H(-)	100	(S)-Lactaldehyde	(S)-Lactaldehyde; L-2-Hydroxypropionaldehyde; L-Lactaldehyde	C00424
14	73.029	1	0.891149	28688.9	0.000497383	C3H6O2	-H(-)	100	(R)-Lactaldehyde	(R)-Lactaldehyde; D-2-Hydroxypropionaldehyde; D-Lactaldehyde	C00937
14	73.029	1	0.891149	28688.9	0.000497383	C3H6O2	-H(-)	100	3-Hydroxypropanal	3-Hydroxypropanal	C00969
14	73.029	1	0.891149	28688.9	0.000497383	C3H6O2	-H(-)	100	Hydroxyacetone	1-Hydroxy-2-propanone; 2-Ketopropyl alcohol; Acetol; Acetone alcohol; Hydroxyacetone; Methylketol; Pyruvic alcohol; Pyruvinalcohol	C05235
14	73.029	1	0.891149	28688.9	0.000497383	C3H6O2	-H(-)	100	Lactaldehyde	2-Hydroxypropanal; 2-Hydroxypropionaldehyde; Lactaldehyde	C05999
14	73.029	1	0.891149	28688.9	0.000497383	C3H6O2	-H(-)	100	Glycidol	Glycidol	C10920
14	73.029	1	0.891149	28688.9	0.000497383	C3H6O2	-H(-)	100	Methyl acetate	Devoton; Methyl acetate; Tereton	C17530
15	74.0243	1	0.875564	12143.3	0.000412399	C2H5NO2	-H(-)	100	Glycine	Aminoacetic acid; Gly; Glycine	C00037
15	74.0243	1	0.875564	12143.3	0.000412399	C2H5NO2	-H(-)	100	Nitroethane	Nitroethane	C01837
15	74.0243	1	0.875564	12143.3	0.000412399	C2H5NO2	-H(-)	100	Acetohydroxamic acid	Acetohydroxamic acid	C06808
15	74.0243	1	0.875564	12143.3	0.000412399	C2H5NO2	-H(-)	100	Methyl carbamate	Methyl carbamate	C19445
16	75.0084	1	0.868402	6404.4	0.000373916	C2H4O3	-H(-)	100	Glycolate	Glycolate; Glycolic acid; Hydroxyacetic acid	C00160
17	83.0135	1	0.815933	7759.48	0.000353503	C4H4O2	-H(-)	100	4-Hydroxy-2-butynal	4-Hydroxy-2-butynal; 4-Hydroxybut-2-ynal	C02648
17	83.0135	1	0.815933	7759.48	0.000353503	C4H4O2	-H(-)	100	3-Butynoate	3-Butynoate; But-3-ynoate	C06144
17	83.0135	1	0.815933	7759.48	0.000353503	C4H4O2	-H(-)	100	2(5H)-Furanone	2(5H)-Furanone; Butenolide; gamma-Crotonolactone	C17601
17	83.0135	1	0.815933	7759.48	0.000353503	C4H4O2	-H(-)	100	2(3H)-Furanone	2(3H)-Furanone; alpha-Crotonolactone	C17602
18	83.0502	1	0.7998	1956.11	3.34603e-05	C5H8O	-H(-)	100	Cyclopentanone	Cyclopentanone	C00557
18	83.0502	1	0.7998	1956.11	3.34603e-05	C5H8O	-H(-)	100	3-Methyl-2-butenal	3,3-Dimethyl-acrylaldehyde; 3-Methyl-2-butenal; 3-Methylbut-2-enal; Prenal; Senecialdehyde	C07330
19	84.0453	1	0.869644	2833.6	0.000147914	C4H7NO	-H(-)	100	Acetone cyanohydrin	2-Hydroxy-2-methylpropanenitrile; 2-Hydroxyisobutyronitrile; 2-Methyllactonitrile; Acetone cyanhydrin; Acetone cyanohydrin; alpha-Hydroxyisobutyronitrile	C02659
20	85.0292	1	0.922345	67304.6	0.000262603	C4H6O2	-H(-)	100	Diacetyl	2,3-Butanedione; Biacetyl; Diacetyl; Dimethylglyoxal	C00741
20	85.0292	1	0.922345	67304.6	0.000262603	C4H6O2	-H(-)	100	gamma-Butyrolactone	1,4-Lactone; gamma-Butyrolactone	C01770
20	85.0292	1	0.922345	67304.6	0.000262603	C4H6O2	-H(-)	100	2-Butenoate	2-Butenoate; 2-Butenoic acid; 3-Methylacrylic acid; Crotonic acid	C01771
20	85.0292	1	0.922345	67304.6	0.000262603	C4H6O2	-H(-)	100	2-Butyne-1,4-diol	1,4-Butynediol; 2-Butyne-1,4-diol	C02497
20	85.0292	1	0.922345	67304.6	0.000262603	C4H6O2	-H(-)	100	Cyclopropanecarboxylate	Cyclopropanecarboxylate	C16267
20	85.0292	1	0.922345	67304.6	0.000262603	C4H6O2	-H(-)	100	Succinic aldehyde	Succindialdehyde; Succinic aldehyde	C16835
20	85.0292	1	0.922345	67304.6	0.000262603	C4H6O2	-H(-)	100	beta-Butyrolactone	beta-Butyrolactone	C19201
20	85.0292	1	0.922345	67304.6	0.000262603	C4H6O2	-H(-)	100	Vinyl acetate	Vinyl acetate	C19309
20	85.0292	1	0.922345	67304.6	0.000262603	C4H6O2	-H(-)	100	Methyl acrylate	Methyl acrylate	C19443
21	85.0657	1	0.8546	1223.47	0.000143286	C5H10O	-H(-)	100	Prenol	3-Methyl-2-buten-1-ol; Prenol; Prenyl alcohol	C01390
21	85.0657	1	0.8546	1223.47	0.000143286	C5H10O	-H(-)	100	Pentan-2-one	2-Pentanone; Methyl propyl ketone; Pentan-2-one	C01949
21	85.0657	1	0.8546	1223.47	0.000143286	C5H10O	-H(-)	100	Cyclopentanol	Cyclopentanol; Cyclopentyl alcohol	C02020
21	85.0657	1	0.8546	1223.47	0.000143286	C5H10O	-H(-)	100	2-Methylbutanal	2-Methylbutanal; 2-Methylbutyraldehyde	C02223
21	85.0657	1	0.8546	1223.47	0.000143286	C5H10O	-H(-)	100	3-Methylbutanal	3-Methylbutanal; Isovaleraldehyde	C07329
22	86.0246	1	0.862223	2116.79	0.000145913	C3H5NO2	-H(-)	100	Dehydroalanine	2-Aminoacrylate; Dehydroalanine	C02218
22	86.0246	1	0.862223	2116.79	0.000145913	C3H5NO2	-H(-)	100	2-Oxazolidinone	2-Oxazolidinone	C06695
22	86.0246	1	0.862223	2116.79	0.000145913	C3H5NO2	-H(-)	100	Aminoacrylate	(Z)-3-Aminoacrylate; Aminoacrylate	C20253
23	87.0086	1	0.87014	22992	0.000154333	C3H4O3	-H(-)	100	Pyruvate	2-Oxopropanoate; 2-Oxopropanoic acid; Pyroracemic acid; Pyruvate; Pyruvic acid	C00022
23	87.0086	1	0.87014	22992	0.000154333	C3H4O3	-H(-)	100	3-Oxopropanoate	3-Oxopropanoate; Malonate semialdehyde	C00222
23	87.0086	1	0.87014	22992	0.000154333	C3H4O3	-H(-)	100	3-Hydroxypropenoate	3-Hydroxypropenoate	C12069
23	87.0086	1	0.87014	22992	0.000154333	C3H4O3	-H(-)	100	Ethylene carbonate	1,3-Dioxolan-2-one; Ethylene carbonate	C20363
24	87.0449	1	0.839396	3228.06	0.000199326	C4H8O2	-H(-)	100	Butanoic acid	Butanoate; Butanoic acid; Butyrate; Butyric acid	C00246
24	87.0449	1	0.839396	3228.06	0.000199326	C4H8O2	-H(-)	100	Acetoin	2-Acetoin; 3-Hydroxy-2-butanone; 3-Hydroxybutan-2-one; Acetoin; Dimethylketol	C00466
24	87.0449	1	0.839396	3228.06	0.000199326	C4H8O2	-H(-)	100	(R)-Acetoin	(R)-2-Acetoin; (R)-3-Hydroxy-2-butanone; (R)-3-Hydroxybutan-2-one; (R)-Acetoin; (R)-Dimethylketol	C00810
24	87.0449	1	0.839396	3228.06	0.000199326	C4H8O2	-H(-)	100	Ethyl acetate	Ethyl acetate	C00849
24	87.0449	1	0.839396	3228.06	0.000199326	C4H8O2	-H(-)	100	(S)-Acetoin	(S)-2-Acetoin; (S)-Acetoin	C01769
24	87.0449	1	0.839396	3228.06	0.000199326	C4H8O2	-H(-)	100	2-Methylpropanoate	2-Methylpropanoate; 2-Methylpropanoic acid; Dimethylacetic acid; Isobutanoate; Isobutyrate; Isobutyric acid	C02632
24	87.0449	1	0.839396	3228.06	0.000199326	C4H8O2	-H(-)	100	1,4-Dioxane	1,4-Dioxane; p-Dioxane	C14440
25	88.0403	1	0.827811	16790.2	0.000136137	C3H7NO2	-H(-)	100	L-Alanine	L-2-Aminopropionic acid; L-Alanine; L-alpha-Alanine	C00041
25	88.0403	1	0.827811	16790.2	0.000136137	C3H7NO2	-H(-)	100	beta-Alanine	3-Aminopropanoate; 3-Aminopropionic acid; beta-Alanine	C00099
25	88.0403	1	0.827811	16790.2	0.000136137	C3H7NO2	-H(-)	100	D-Alanine	D-2-Aminopropionic acid; D-Ala; D-Alanine	C00133
25	88.0403	1	0.827811	16790.2	0.000136137	C3H7NO2	-H(-)	100	Sarcosine	N-Methylglycine; Sarcosine	C00213
25	88.0403	1	0.827811	16790.2	0.000136137	C3H7NO2	-H(-)	100	Alanine	2-Aminopropanoic acid; 2-Aminopropionic acid; Alanine	C01401
25	88.0403	1	0.827811	16790.2	0.000136137	C3H7NO2	-H(-)	100	Urethane	Ethyl carbamate; Urethane	C01537
25	88.0403	1	0.827811	16790.2	0.000136137	C3H7NO2	-H(-)	100	2-Nitropropane	2-Nitropropane	C02116
25	88.0403	1	0.827811	16790.2	0.000136137	C3H7NO2	-H(-)	100	HMMF	HMMF; N-Hydroxymethyl-N-methylformamide	C11488
26	88.9879	1	0.829898	3667.83	0.000154315	C2H2O4	-H(-)	100	Oxalate	Ethanedioic acid; Oxalate; Oxalic acid	C00209
26	88.9879	1	0.829898	3667.83	0.000154315	(CHO2)2.	-H(-)	100	Calcium formate	Calcium formate; Formic acid, calcium salt	C18586
27	89.0242	1	0.915607	55953.1	0.000206775	C3H6O3	-H(-)	100	Glycerone	1,3-Dihydroxy-2-propanone; 1,3-Dihydroxyacetone; 1,3-Dihydroxypropan-2-one; Dihydroxyacetone; Glycerone	C00184
27	89.0242	1	0.915607	55953.1	0.000206775	C3H6O3	-H(-)	100	(S)-Lactate	(S)-Lactate; L-Lactate; L-Lactic acid	C00186
27	89.0242	1	0.915607	55953.1	0.000206775	C3H6O3	-H(-)	100	(R)-Lactate	(R)-Lactate; D-2-Hydroxypropanoic acid; D-2-Hydroxypropionic acid; D-Lactate; D-Lactic acid	C00256
27	89.0242	1	0.915607	55953.1	0.000206775	C3H6O3	-H(-)	100	D-Glyceraldehyde	D-Glyceraldehyde	C00577
27	89.0242	1	0.915607	55953.1	0.000206775	C3H6O3	-H(-)	100	3-Hydroxypropanoate	3-Hydroxypropanoate; 3-Hydroxypropanoic acid; 3-Hydroxypropionate; 3-Hydroxypropionic acid; Hydracrylic acid	C01013
27	89.0242	1	0.915607	55953.1	0.000206775	C3H6O3	-H(-)	100	Lactate	2-Hydroxypropanoic acid; 2-Hydroxypropionic acid; Lactate; Lactic acid	C01432
27	89.0242	1	0.915607	55953.1	0.000206775	C3H6O3	-H(-)	100	Glyceraldehyde	2,3-Dihydroxypropanal; 2,3-Dihydroxypropionaldehyde; Aldotriose; Glyceraldehyde; Glycerose	C02154
27	89.0242	1	0.915607	55953.1	0.000206775	C3H6O3	-H(-)	100	L-Glyceraldehyde	L-2,3-Dihydroxypropanal; L-2,3-Dihydroxypropionaldehyde; L-Aldotriose; L-Glyceraldehyde; L-Glycerose	C02426
28	93.0346	1	0.841704	3982.78	2.30599e-05	C6H6O	-H(-)	100	Phenol	Benzenol; Hydroxybenzene; Phenic acid; Phenol; Phenylic acid	C00146
28	93.0346	1	0.841704	3982.78	2.30599e-05	C6H6O	-H(-)	100	Arene oxide	Arene oxide	C01782
28	93.0346	1	0.841704	3982.78	2.30599e-05	C6H6O	-H(-)	100	Phenol	Phenol	C15584
29	94.0299	1	0.805189	1190.38	-0.000114033	C5H5NO	-H(-)	100	2-Hydroxypyridine	2-Hydroxypyridine; 2-Pyridinol; 2-Pyridone	C02502
30	95.0137	1	0.422516	32095.4	0.000165408	C5H4O2	-H(-)	100	Protoanemonin	4-Methylenebut-2-en-4-olide; Protoanemonin; cis-4-Methylenebut-2-en-4-olide	C07090
30	95.0137	1	0.422516	32095.4	0.000165408	C5H4O2	-H(-)	100	Furfural	2-Furaldehyde; Furfural	C14279
31	95.05	1	0.241937	4631.97	0.000239669	C6H8O	-H(-)	100	Cyclohex-2-enone	2-Cyclohexen-1-one; Cyclohex-2-enone	C02395
31	95.05	1	0.241937	4631.97	0.000239669	C6H8O	-H(-)	100	2,4-Hexadienal	(E,E)-2,4-Hexadienal; 2,4-Hexadienal	C19249
32	100.04	1	0.835115	18497.9	8.12579e-05	C4H7NO2	-H(-)	100	1-Aminocyclopropane-1-carboxylate	1-Aminocyclopropane-1-carboxylate; 1-Aminocyclopropane-1-carboxylic acid	C01234
32	100.04	1	0.835115	18497.9	8.12579e-05	C4H7NO2	-H(-)	100	Homoserine lactone	2-Aminobutan-4-olide; Homoserine lactone	C02926
32	100.04	1	0.835115	18497.9	8.12579e-05	C4H7NO2	-H(-)	100	Diacetylmonoxime	2,3-Butanedione monoxime; Diacetylmonoxime	C07509
32	100.04	1	0.835115	18497.9	8.12579e-05	C4H7NO2	-H(-)	100	L-Azetidine 2-carboxylic acid	(S)-(-)-Azetidine-2-carboxylic acid; Azetidyl-2-carboxylic acid; L-Azetidine 2-carboxylic acid	C08267
32	100.04	1	0.835115	18497.9	8.12579e-05	C4H7NO2	-H(-)	100	3-Oxobutanamide	3-Oxobutanamide; AAA; Acetoacetamide	C11106
32	100.04	1	0.835115	18497.9	8.12579e-05	C4H7NO2	-H(-)	100	2-Aminobut-2-enoate	(2Z)-2-Aminobut-2-enoic acid; 2-Aminobut-2-enoate; 2-Ammoniobut-2-enoate	C17234
32	100.04	1	0.835115	18497.9	8.12579e-05	C4H7NO2	-H(-)	100	N-Methylolacrylamide	N-(Hydroxymethyl)acrylamide; N-Methylolacrylamide	C19456
32	100.04	1	0.835115	18497.9	8.12579e-05	C4H7NO2	-H(-)	100	L-Homoserine lactone	L-Homoserine lactone	C19777
33	100.077	1	0.643514	4165.76	0.000151067	C5H11NO	-H(-)	100	Pentanamide	Pentanamide; Valeramide	C01842
33	100.077	1	0.643514	4165.76	0.000151067	C5H11NO	-H(-)	100	2-Methylpropanal O-methyloxime	2-Methylpropanal O-methyloxime; Isobutyraldoxime O-methyl ether	C03982
33	100.077	1	0.643514	4165.76	0.000151067	C5H11NO	-H(-)	100	4-Methylaminobutanal	4-Methylaminobutanal	C10974
33	100.077	1	0.643514	4165.76	0.000151067	C5H11NO	-H(-)	100	5-Aminopentanal	5-Aminopentanal	C12455
33	100.077	1	0.643514	4165.76	0.000151067	C5H11NO	-H(-)	100	3-Methylbutyraldehyde oxime	3-Methylbutyraldehyde oxime	C17255
33	100.077	1	0.643514	4165.76	0.000151067	C5H11NO	-H(-)	100	(E)-2-Methylbutanal oxime	(E)-2-Methylbutanal oxime	C19491
33	100.077	1	0.643514	4165.76	0.000151067	C5H11NO	-H(-)	100	(Z)-2-Methylbutanal oxime	(Z)-2-Methylbutanal oxime	C20312
34	101.024	1	0.915623	176327	0.000144914	C4H6O3	-H(-)	100	2-Oxobutanoate	2-Ketobutyric acid; 2-Oxobutanoate; 2-Oxobutanoic acid; 2-Oxobutyrate; 2-Oxobutyric acid; alpha-Ketobutyrate; alpha-Ketobutyric acid	C00109
34	101.024	1	0.915623	176327	0.000144914	C4H6O3	-H(-)	100	Acetoacetate	3-Oxobutanoic acid; Acetoacetate; Acetoacetic acid; beta-Ketobutyric acid	C00164
34	101.024	1	0.915623	176327	0.000144914	C4H6O3	-H(-)	100	Succinate semialdehyde	4-Oxobutanoate; Succinate semialdehyde; Succinic semialdehyde	C00232
34	101.024	1	0.915623	176327	0.000144914	C4H6O3	-H(-)	100	2-Methyl-3-oxopropanoate	2-Methyl-3-oxopropanoate; 3-Oxo-2-methylpropanoate; Methylmalonate semialdehyde	C00349
34	101.024	1	0.915623	176327	0.000144914	C4H6O3	-H(-)	100	(S)-Methylmalonate semialdehyde	(S)-Methylmalonate semialdehyde	C06002
35	101.061	1	0.387898	23064.4	0.000185661	C5H10O2	-H(-)	100	Valerate	Pentanoate; Pentanoic acid; Valerate; Valerianic acid; Valeric acid; n-Pentanoate; n-Valeric acid	C00803
35	101.061	1	0.387898	23064.4	0.000185661	C5H10O2	-H(-)	100	3-Methylbutanoic acid	3-Methylbutanoic acid; Isovalerate; Isovaleric acid	C08262
35	101.061	1	0.387898	23064.4	0.000185661	C5H10O2	-H(-)	100	2-Methylbutyrate	2-Methylbutyrate; 2-Methylbutyric acid	C18319
36	101.073	1	0.321395	20176.8	-0.000542899	C4H10N2O	-H(-)	100	N-Nitrosodiethylamine	Diethylnitrosamine; N-Nitrosodiethylamine; NDEA	C14422
37	102.056	1	0.927492	102830	-0.000120912	C4H9NO2	-H(-)	100	4-Aminobutanoate	4-Aminobutanoate; 4-Aminobutanoic acid; 4-Aminobutyrate; 4-Aminobutyric acid; GABA; gamma-Aminobutyric acid	C00334
37	102.056	1	0.927492	102830	-0.000120912	C4H9NO2	-H(-)	100	N,N-Dimethylglycine	Dimethylglycine; N,N-Dimethylglycine	C01026
37	102.056	1	0.927492	102830	-0.000120912	C4H9NO2	-H(-)	100	(R)-3-Amino-2-methylpropanoate	(R)-3-Amino-2-methylpropanoate; D-3-Amino-isobutanoate	C01205
37	102.056	1	0.927492	102830	-0.000120912	C4H9NO2	-H(-)	100	D-2-Aminobutyrate	(R)-2-Aminobutanoic acid; D-2-Aminobutanoic acid; D-2-Aminobutyrate; D-2-Aminobutyric acid	C02261
37	102.056	1	0.927492	102830	-0.000120912	C4H9NO2	-H(-)	100	(S)-2-Aminobutanoate	(S)-2-Aminobutanoate; (S)-2-Aminobutanoic acid; (S)-2-Aminobutyric acid	C02356
37	102.056	1	0.927492	102830	-0.000120912	C4H9NO2	-H(-)	100	N-Methyl-L-alanine	N-Methyl-L-alanine	C02721
37	102.056	1	0.927492	102830	-0.000120912	C4H9NO2	-H(-)	100	L-3-Amino-isobutanoate	(S)-3-Amino-2-methylpropanoate; (S)-3-Amino-isobutanoate; (S)-3-Amino-isobutyrate; L-3-Amino-isobutanoate; L-3-Amino-isobutyrate	C03284
37	102.056	1	0.927492	102830	-0.000120912	C4H9NO2	-H(-)	100	2-Amino-2-methylpropanoate	2-Amino-2-methylpropanoate; 2-Aminoisobutyric acid	C03665
37	102.056	1	0.927492	102830	-0.000120912	C4H9NO2	-H(-)	100	3-Aminoisobutyric acid	3-Amino-2-methylpropanoate; 3-Aminoisobutanoate; 3-Aminoisobutyric acid	C05145
37	102.056	1	0.927492	102830	-0.000120912	C4H9NO2	-H(-)	100	HBA	HBA	C11109
37	102.056	1	0.927492	102830	-0.000120912	C4H9NO2	-H(-)	100	N-Ethylglycine	N-Ethylglycine	C11735
37	102.056	1	0.927492	102830	-0.000120912	C4H9NO2	-H(-)	100	n-Propyl carbamate	n-Propyl carbamate	C19514
38	103.04	1	0.77799	13086	8.47216e-05	C4H8O3	-H(-)	100	4-Hydroxybutanoic acid	4-Hydroxybutanoate; 4-Hydroxybutanoic acid; 4-Hydroxybutyric acid	C00989
38	103.04	1	0.77799	13086	8.47216e-05	C4H8O3	-H(-)	100	(R)-3-Hydroxybutanoate	(R)-3-Hydroxybutanoate; (R)-3-Hydroxybutanoic acid; (R)-3-Hydroxybutyric acid; D-beta-Hydroxybutyric acid	C01089
38	103.04	1	0.77799	13086	8.47216e-05	C4H8O3	-H(-)	100	3-Hydroxy-2-methylpropanoate	3-Hydroxy-2-methylpropanoate; 3-Hydroxyisobutyrate; 3-Hydroxyisobutyric acid	C01188
38	103.04	1	0.77799	13086	8.47216e-05	C4H8O3	-H(-)	100	4-Hydroxyacid	4-Hydroxyacid; 4-Hydroxyalkanoic acid; 4-Hydroxycarboxylic acid	C01991
38	103.04	1	0.77799	13086	8.47216e-05	C4H8O3	-H(-)	100	(S)-3-Hydroxybutanoate	(S)-3-Hydroxybutanoate	C03197
38	103.04	1	0.77799	13086	8.47216e-05	C4H8O3	-H(-)	100	2-Hydroxybutanoic acid	2-Hydroxybutanoic acid; 2-Hydroxybutyrate; 2-Hydroxybutyric acid	C05984
38	103.04	1	0.77799	13086	8.47216e-05	C4H8O3	-H(-)	100	(S)-3-Hydroxyisobutyrate	(S)-3-Hydroxyisobutyrate	C06001
38	103.04	1	0.77799	13086	8.47216e-05	C4H8O3	-H(-)	100	Methyl methoxyacetate	Methyl methoxyacetate	C14601
39	104.035	1	0.917647	31934.9	3.43498e-05	C3H7NO3	-H(-)	100	L-Serine	L-2-Amino-3-hydroxypropionic acid; L-3-Hydroxy-alanine; L-Serine; Serine	C00065
39	104.035	1	0.917647	31934.9	3.43498e-05	C3H7NO3	-H(-)	100	Serine	2-Amino-3-hydroxypropionic acid; 3-Hydroxyalanine; Serine	C00716
39	104.035	1	0.917647	31934.9	3.43498e-05	C3H7NO3	-H(-)	100	D-Serine	D-Serine	C00740
40	105.019	1	0.84255	10466.3	0.000126908	C3H6O4	-H(-)	100	D-Glycerate	(R)-Glycerate; D-Glycerate; Glycerate; Glyceric acid	C00258
41	106.99	1	0.330437	977.33	0.000781275	C3H5ClO2	-H(-)	25	(S)-2-Chloropropanoate	(S)-2-Chloropropanoate; (S)-2-Chloropropanoic acid	C20608
42	107.014	1	0.859077	1782.5	0.000230262	C6H4O2	-H(-)	100	p-Benzoquinone	1,4-Benzoquinone; 2,5-Cyclohexadiene-1,4-dione; Chinone; Quinone; p-Benzoquinone	C00472
42	107.014	1	0.859077	1782.5	0.000230262	C6H4O2	-H(-)	100	o-Benzoquinone	1,2-Benzoquinone; o-Benzoquinone	C02351
43	107.05	1	0.345517	11103.7	0.000120303	C7H8O	-H(-)	100	Benzyl alcohol	Benzenemethanol; Benzyl alcohol; Hydroxymethylbenzene; Phenylcarbinol; Phenylmethanol; alpha-Hydroxytoluene	C00556
43	107.05	1	0.345517	11103.7	0.000120303	C7H8O	-H(-)	100	Anisole	Anisole; Methoxybenzene; Methyl phenyl ether; Phenol methyl ether	C01403
43	107.05	1	0.345517	11103.7	0.000120303	C7H8O	-H(-)	100	3-Cresol	3-Cresol; 3-Hydroxytoluene; m-Cresol	C01467
43	107.05	1	0.345517	11103.7	0.000120303	C7H8O	-H(-)	100	4-Cresol	4-Cresol; 4-Hydroxytoluene; 4-Methylphenol; p-Cresol	C01468
43	107.05	1	0.345517	11103.7	0.000120303	C7H8O	-H(-)	100	o-Cresol	2-Hydroxytoluene; o-Cresol; o-Methylphenol	C01542
43	107.05	1	0.345517	11103.7	0.000120303	C7H8O	-H(-)	100	Aromatic primary alcohol	Aromatic alcohol; Aromatic primary alcohol	C03485
44	108.021	1	0.892746	9228.67	0.000457287	C6H5O2	-H(-)	100	p-Benzosemiquinone	4-Hydroxyphenoxy radical; p-Benzosemiquinone	C02389
44	108.021	1	0.892746	9228.67	0.000457287	C6H5O2	-H(-)	100	o-Benzosemiquinone	2-Hydroxyphenoxy radical; o-Benzosemiquinone	C05060
45	108.045	1	0.210337	14203.4	0.000251035	C6H7NO	-H(-)	100	2-Aminophenol	2-Aminobenzenol; 2-Aminophenol; 2-Hydroxyaniline; o-Aminophenol	C01987
45	108.045	1	0.210337	14203.4	0.000251035	C6H7NO	-H(-)	100	4-Hydroxyaniline	4-Aminobenzenol; 4-Aminophenol; 4-Hydroxyaniline; p-Aminophenol	C02372
45	108.045	1	0.210337	14203.4	0.000251035	C6H7NO	-H(-)	100	Hydroxylaminobenzene	(Hydroxyamino)benzene; Hydroxylaminobenzene	C02720
45	108.045	1	0.210337	14203.4	0.000251035	C6H7NO	-H(-)	100	m-Aminophenol	3-Aminophenol; 3-Hydroxyaniline; m-Aminophenol	C05058
46	109.029	1	0.498199	50783	0.000274461	C6H6O2	-H(-)	100	Catechol	1,2-Benzenediol; 1,2-Dihydroxybenzene; Brenzcatechin; Catechol; Pyrocatechol; o-Benzenediol	C00090
46	109.029	1	0.498199	50783	0.000274461	C6H6O2	-H(-)	100	Hydroquinone	1,4-Benzenediol; 1,4-Dihydroxybenzene; 4-Hydroxyphenol; Benzene-1,4-diol; Hydroquinone; Quinol; p-Benzenediol	C00530
46	109.029	1	0.498199	50783	0.000274461	C6H6O2	-H(-)	100	Resorcinol	1,3-Benzenediol; 1,3-Dihydroxybenzene; Resorcin; Resorcinol; m-Hydroquinone	C01751
46	109.029	1	0.498199	50783	0.000274461	C6H6O2	-H(-)	100	Benzenediol	Benzenediol	C01785
46	109.029	1	0.498199	50783	0.000274461	C6H6O2	-H(-)	100	5-Methyl-2-furaldehyde	5-Methyl-2-furaldehyde; 5-Methyl-2-furfural	C11115
46	109.029	1	0.498199	50783	0.000274461	C6H6O2	-H(-)	100	Catechol	Catechol	C15571
47	109.04	1	0.841418	21116	0.000799399	C5H6N2O	-H(-)	100	N-Acetylimidazole	1-Acetyl-1H-imidazole; N-Acetylimidazole	C02560
47	109.04	1	0.841418	21116	0.000799399	C5H6N2O	-H(-)	100	Imidazole-4-acetaldehyde	Imidazole acetaldehyde; Imidazole-4-acetaldehyde	C05130
48	110.025	1	0.699142	11166.6	0.000106101	C5H5NO2	-H(-)	100	2,5-Dihydroxypyridine	2,5-Dihydroxypyridine	C01059
48	110.025	1	0.699142	11166.6	0.000106101	C5H5NO2	-H(-)	100	3,4-Dihydroxypyridine	3,4-Dihydroxypyridine	C02932
48	110.025	1	0.699142	11166.6	0.000106101	C5H5NO2	-H(-)	100	2,6-Dihydroxypyridine	2,6-Dihydroxypyridine	C03056
48	110.025	1	0.699142	11166.6	0.000106101	C5H5NO2	-H(-)	100	3-Hydroxy-4H-pyrid-4-one	3-Hydroxy-4(1H)-pyridinone; 3-Hydroxy-4H-pyrid-4-one; 3-Hydroxypyridin-4(1H)-one	C03927
48	110.025	1	0.699142	11166.6	0.000106101	C5H5NO2	-H(-)	100	Pyrrole-2-carboxylate	Pyrrole-2-carboxylate	C05942
49	110.976	1	0.828523	1903	0.000222062	CH4O4S	-H(-)	100	Monomethyl sulfate	Methyl sulfate; Monomethyl sulfate	C02704
50	111.009	1	0.700051	383700	0.000252291	C5H4O3	-H(-)	100	2-Furoate	2-Furancarboxylic acid; 2-Furoate; 2-Furoic acid; Pyromucic acid	C01546
51	111.019	1	0.879848	53312	0.00083746	C4H4N2O2	-H(-)	100	Uracil	Uracil	C00106
51	111.019	1	0.879848	53312	0.00083746	C4H4N2O2	-H(-)	100	Maleic hydrazide	Maleic hydrazide	C18474
52	111.045	1	0.839553	7543.96	0.000164395	C6H8O2	-H(-)	100	Cyclohexane-1,3-dione	1,3-Cyclohexanedione; Cyclohexane-1,3-dione; Dihydroresorcinol	C01066
52	111.045	1	0.839553	7543.96	0.000164395	C6H8O2	-H(-)	100	cis-1,2-Dihydrobenzene-1,2-diol	cis-1,2-Dihydrobenzene-1,2-diol; cis-Benzeneglycol; cis-Cyclohexa-3,5-diene-1,2-diol	C04091
52	111.045	1	0.839553	7543.96	0.000164395	C6H8O2	-H(-)	100	trans-1,2-Dihydrobenzene-1,2-diol	trans-1,2-Dihydrobenzene-1,2-diol	C04221
52	111.045	1	0.839553	7543.96	0.000164395	C6H8O2	-H(-)	100	Cyclohexane-1,2-dione	Cyclohexane-1,2-dione	C06105
52	111.045	1	0.839553	7543.96	0.000164395	C6H8O2	-H(-)	100	1,4-Cyclohexanedione	1,4-Cyclohexanedione	C08063
52	111.045	1	0.839553	7543.96	0.000164395	C6H8O2	-H(-)	100	Parasorbic acid	Parasorbic acid	C08502
53	112.04	1	0.721333	10355.9	0.00010066	C5H7NO2	-H(-)	100	1-Pyrroline-2-carboxylate	1-Pyrroline 2-carboxylate; 1-Pyrroline-2-carboxylate; 1-Pyrroline-2-carboxylic acid; delta1-Pyrroline 2-carboxylate	C03564
53	112.04	1	0.721333	10355.9	0.00010066	C5H7NO2	-H(-)	100	(S)-1-Pyrroline-5-carboxylate	(S)-1-Pyrroline-5-carboxylate; 1-Pyrroline-5-carboxylate; L-1-Pyrroline-5-carboxylate	C03912
53	112.04	1	0.721333	10355.9	0.00010066	C5H7NO2	-H(-)	100	delta-1-Pyrroline-5-carboxylate	3,4-Dihydro-2H-Pyrrole-2-carboxylate; delta-1-Pyrroline-5-carboxylate	C04322
53	112.04	1	0.721333	10355.9	0.00010066	C5H7NO2	-H(-)	100	Glutarimide	2,6-Diketopiperidine; Glutarimide; Piperidine-2,6-dione	C07275
54	112.052	1	0.690599	3042.1	9.61407e-05	C4H7N3O	-H(-)	100	Creatinine	1-Methylglycocyamidine; Creatinine	C00791
54	112.052	1	0.690599	3042.1	9.61407e-05	C4H7N3O	-H(-)	100	3-(N-Nitrosomethylamino)propionitrile	3-(Methylnitrosamino)propionitrile; 3-(N-Nitrosomethylamino)propionitrile	C19280
55	113.024	1	0.948693	240238	0.000239833	C5H6O3	-H(-)	100	2-Hydroxy-2,4-pentadienoate	2-Hydroxy-2,4-pentadienoate; 2-Hydroxypenta-2,4-dienoate; 2-Oxopent-4-enoate; Oxopent-4-enoate; cis-2-Hydroxypenta-2,4-dienoate	C00596
55	113.024	1	0.948693	240238	0.000239833	C5H6O3	-H(-)	100	cis-Acetylacrylate	cis-Acetylacrylate	C07091
56	113.035	1	0.935489	41949.2	0.000329291	C4H6N2O2	-H(-)	100	5,6-Dihydrouracil	2,4-Dioxotetrahydropyrimidine; 5,6-Dihydro-2,4-dihydroxypyrimidine; 5,6-Dihydrouracil; Dihydro-2,4(1H,3H)-pyrimidinedione; Dihydrouracil; Dihydrouracile; Hydrouracil	C00429
56	113.035	1	0.935489	41949.2	0.000329291	C4H6N2O2	-H(-)	100	3-Cyano-L-alanine	3-Cyano-L-alanine; L-3-Cyanoalanine; L-beta-Cyanoalanine	C02512
56	113.035	1	0.935489	41949.2	0.000329291	C4H6N2O2	-H(-)	100	N-Methylhydantoin	N-Methylhydantoin; N-Methylimidazolidine-2,4-dione	C02565
56	113.035	1	0.935489	41949.2	0.000329291	C4H6N2O2	-H(-)	100	2,5-Dioxopiperazine	2,5-Diazacyclohexane-1,4-dione; 2,5-Dioxopiperazine; 2,5-Piperazinedione; Diketopiperazine; Glycine anhydride	C02777
56	113.035	1	0.935489	41949.2	0.000329291	C4H6N2O2	-H(-)	100	Muscimol	Muscimol	C08311
57	113.061	1	0.901461	6205.63	0.000223796	C6H10O2	-H(-)	100	2-Hydroxycyclohexan-1-one	2-Hydroxycyclohexan-1-one; 2-Hydroxycyclohexanone; Adipoin	C01147
57	113.061	1	0.901461	6205.63	0.000223796	C6H10O2	-H(-)	100	epsilon-Caprolactone	1-Oxa-2-oxocycloheptane; 2-Oxepanone; 6-Hexanolide; Hexano-6-lactone; epsilon-Caprolactone	C01880
57	113.061	1	0.901461	6205.63	0.000223796	C6H10O2	-H(-)	100	3-Hydroxycyclohexanone	3-Hydroxycyclohexanone	C03228
58	113.097	1	0.883325	1909.84	7.11249e-05	C7H14O	-H(-)	100	2-Heptanone	2-Heptanone; Heptan-2-one; Methyl n-amyl ketone	C08380
58	113.097	1	0.883325	1909.84	7.11249e-05	C7H14O	-H(-)	100	Heptanal	Heptanal; n-Heptaldehyde	C14390
59	114.019	1	0.881706	13568.3	0.000317516	C4H5NO3	-H(-)	100	Maleamate	Maleamate; Maleamic acid	C01596
60	114.056	1	0.94975	2.46191e+06	0.000236245	C5H9NO2	-H(-)	91	L-Proline	2-Pyrrolidinecarboxylic acid; L-Proline	C00148
60	114.056	1	0.94975	2.46191e+06	0.000236245	C5H9NO2	-H(-)	91	D-Proline	D-Proline	C00763
60	114.056	1	0.94975	2.46191e+06	0.000236245	C5H9NO2	-H(-)	91	Proline	Proline	C16435
60	114.056	1	0.94975	2.46191e+06	0.000236245	C5H9NO2	-H(-)	91	3-Acetamidopropanal	3-Acetamidopropanal	C18170
61	115.004	1	0.86475	58326.6	0.000159966	C4H4O4	-H(-)	100	Fumarate	Fumarate; Fumaric acid; trans-Butenedioic acid	C00122
61	115.004	1	0.86475	58326.6	0.000159966	C4H4O4	-H(-)	100	Maleic acid	Maleate; Maleic acid; cis-Butenedioic acid	C01384
61	115.004	1	0.86475	58326.6	0.000159966	C4H4O4	-H(-)	100	Formylpyruvate	Formylpyruvate	C02150
62	115.04	1	0.826195	15532.2	0.000292531	C5H8O3	-H(-)	100	3-Methyl-2-oxobutanoic acid	2-Keto-3-methylbutyric acid; 2-Ketovaline; 2-Oxo-3-methylbutanoate; 2-Oxoisopentanoate; 2-Oxoisovalerate; 3-Methyl-2-oxobutanoate; 3-Methyl-2-oxobutanoic acid; 3-Methyl-2-oxobutyric acid; alpha-Ketovaline	C00141
62	115.04	1	0.826195	15532.2	0.000292531	C5H8O3	-H(-)	100	3-Oxopentanoic acid	3-Oxopentanoate; 3-Oxopentanoic acid	C02233
62	115.04	1	0.826195	15532.2	0.000292531	C5H8O3	-H(-)	100	5-Oxopentanoate	5-Oxopentanoate; Glutarate semialdehyde	C03273
62	115.04	1	0.826195	15532.2	0.000292531	C5H8O3	-H(-)	100	2-Oxopentanoic acid	2-Oxopentanoate; 2-Oxopentanoic acid; 2-Oxovalerate; alpha-Ketovaleric acid	C06255
63	115.076	1	0.794466	13012.2	0.000167974	C6H12O2	-H(-)	100	Hexanoic acid	Hexanoate; Hexanoic acid; Hexylic acid; n-Caproic acid	C01585
63	115.076	1	0.794466	13012.2	0.000167974	C6H12O2	-H(-)	100	4-Hydroxyhexan-3-one	4-Hydroxy-3-hexanone; 4-Hydroxyhexan-3-one; Propioin	C02948
63	115.076	1	0.794466	13012.2	0.000167974	C6H12O2	-H(-)	100	trans-1,2-Cyclohexanediol	trans-1,2-Cyclohexanediol; trans-Cyclohexane-1,2-diol	C03739
63	115.076	1	0.794466	13012.2	0.000167974	C6H12O2	-H(-)	100	Isoamyl formate	Isoamyl formate	C12293
63	115.076	1	0.794466	13012.2	0.000167974	C6H12O2	-H(-)	100	Butyl acetate	Butyl acetate; n-Butyl acetate	C12304
63	115.076	1	0.794466	13012.2	0.000167974	C6H12O2	-H(-)	100	cis-1,2-Cyclohexanediol	cis-1,2-Cyclohexanediol; cis-Cyclohexane-1,2-diol	C12313
64	115.088	1	0.840769	3016.97	0.000179176	C5H12N2O	-H(-)	100	5-Aminopentanamide	5-Aminopentanamide	C00990
65	116.035	1	0.922099	8194.93	0.000277145	C4H7NO3	-H(-)	100	L-Aspartate 4-semialdehyde	Aspartate beta-semialdehyde; L-Aspartate 4-semialdehyde; L-Aspartic 4-semialdehyde	C00441
65	116.035	1	0.922099	8194.93	0.000277145	C4H7NO3	-H(-)	100	2-Amino-3-oxobutanoate	2-Amino-3-oxobutanoate; 2-Amino-acetoacetate	C03214
65	116.035	1	0.922099	8194.93	0.000277145	C4H7NO3	-H(-)	100	L-2-Amino-3-oxobutanoic acid	(S)-2-Amino-3-oxobutanoic acid; L-2-Amino-3-oxobutanoate; L-2-Amino-3-oxobutanoic acid; L-2-Amino-acetoacetate	C03508
65	116.035	1	0.922099	8194.93	0.000277145	C4H7NO3	-H(-)	100	(Z)-2-Methylperoxyaminoacrylate	(Z)-2-Methylperoxyaminoacrylate	C20250
66	116.072	1	0.946387	203222	0.00012062	C5H11NO2	-H(-)	100	L-Valine	2-Amino-3-methylbutyric acid; L-Valine	C00183
66	116.072	1	0.946387	203222	0.00012062	C5H11NO2	-H(-)	100	5-Aminopentanoate	5-Aminopentanoate; 5-Aminopentanoic acid; 5-Aminovaleric acid	C00431
66	116.072	1	0.946387	203222	0.00012062	C5H11NO2	-H(-)	100	Betaine	Betaine; Glycine betaine; N,N,N-Trimethylglycine; Trimethylaminoacetate; Trimethylammonioacetate	C00719
66	116.072	1	0.946387	203222	0.00012062	C5H11NO2	-H(-)	100	D-Norvaline	D-2-Aminopentanoic acid; D-2-Aminovaleric acid; D-Norvaline	C01799
66	116.072	1	0.946387	203222	0.00012062	C5H11NO2	-H(-)	100	L-Norvaline	(S)-2-Aminopentanoic acid; L-2-Aminopentanoic acid; L-2-Aminovaleric acid; L-Norvaline	C01826
66	116.072	1	0.946387	203222	0.00012062	C5H11NO2	-H(-)	100	2-Amino-2-methylbutanoate	2-Amino-2-methylbutanoate	C03571
66	116.072	1	0.946387	203222	0.00012062	C5H11NO2	-H(-)	100	D-Valine	(R)-2-Amino-3-methylbutyric acid; D-Valine	C06417
66	116.072	1	0.946387	203222	0.00012062	C5H11NO2	-H(-)	100	Amyl nitrite	Amyl nitrite; Isoamyl nitrite	C07457
66	116.072	1	0.946387	203222	0.00012062	C5H11NO2	-H(-)	100	4-Methylaminobutyrate	4-Methylaminobutyrate; gamma-N-Methylaminobutyrate	C15987
66	116.072	1	0.946387	203222	0.00012062	C5H11NO2	-H(-)	100	Valine	Valine	C16436
67	117.019	1	0.916187	188055	0.00024348	C4H6O4	-H(-)	100	Succinate	Butanedionic acid; Ethylenesuccinic acid; Succinate; Succinic acid	C00042
67	117.019	1	0.916187	188055	0.00024348	C4H6O4	-H(-)	100	Methylmalonate	Methylmalonate; Methylmalonic acid	C02170
67	117.019	1	0.916187	188055	0.00024348	C4H6O4	-H(-)	100	Methyl oxalate	Methyl oxalate	C10900
68	117.055	1	0.910885	28315.2	0.000363997	C5H10O3	-H(-)	100	5-Hydroxypentanoate	5-Hydroxypentanoate	C02804
68	117.055	1	0.910885	28315.2	0.000363997	C5H10O3	-H(-)	100	3-Hydroxyisovalerate	3-Hydroxy-3-methylbutyrate; 3-Hydroxyisovalerate	C20827
69	118.051	1	0.919066	46851	0.000132982	C4H9NO3	-H(-)	100	L-Threonine	2-Amino-3-hydroxybutyric acid; L-Threonine	C00188
69	118.051	1	0.919066	46851	0.000132982	C4H9NO3	-H(-)	100	L-Homoserine	2-Amino-4-hydroxybutyric acid; L-Homoserine	C00263
69	118.051	1	0.919066	46851	0.000132982	C4H9NO3	-H(-)	100	D-Threonine	D-2-Amino-3-hydroxybutyric acid; D-Threonine	C00820
69	118.051	1	0.919066	46851	0.000132982	C4H9NO3	-H(-)	100	2-Methylserine	2-Methylserine	C02115
69	118.051	1	0.919066	46851	0.000132982	C4H9NO3	-H(-)	100	4-Amino-3-hydroxybutanoate	4-Amino-3-hydroxybutanoate; 4-Amino-3-hydroxybutanoic acid; GABOB; gamma-Amino-beta-hydroxybutyric acid	C03678
69	118.051	1	0.919066	46851	0.000132982	C4H9NO3	-H(-)	100	L-Allothreonine	L-Allothreonine; L-allo-Threonine	C05519
69	118.051	1	0.919066	46851	0.000132982	C4H9NO3	-H(-)	100	(-)-erythro-(2R,3R)-Dihydroxybutylamide	(-)-erythro-(2R,3R)-Dihydroxybutylamide; DBA	C11108
69	118.051	1	0.919066	46851	0.000132982	C4H9NO3	-H(-)	100	D-Allothreonine	D-Allothreonine; D-allo-Threonine	C12317
70	118.98	1	0.490639	348773	0.000530288	C3H4O3S	-H(-)	100	Mercaptopyruvate	3-Mercaptopyruvate; 3-Mercaptopyruvic acid; Mercaptopyruvate	C00957
71	119.035	1	0.920846	49402.5	0.000197685	C4H8O4	-H(-)	100	D-Erythrose	D-Erythrose	C01796
71	119.035	1	0.920846	49402.5	0.000197685	C4H8O4	-H(-)	100	D-Erythrulose	D-Erythrulose; D-glycero-Tetrulose	C02022
71	119.035	1	0.920846	49402.5	0.000197685	C4H8O4	-H(-)	100	L-Erythrulose	L-Erythrulose; L-glycero-Tetrulose	C02045
71	119.035	1	0.920846	49402.5	0.000197685	C4H8O4	-H(-)	100	D-Threose	D-Threose; D-threo-Tetrose	C06463
72	119.05	1	0.841746	52669.2	0.000306636	C8H8O	-H(-)	100	Phenylacetaldehyde	Phenylacetaldehyde; alpha-Tolualdehyde	C00601
72	119.05	1	0.841746	52669.2	0.000306636	C8H8O	-H(-)	100	Styrene oxide	Styrene oxide; Styrene-7,8-oxide	C02083
72	119.05	1	0.841746	52669.2	0.000306636	C8H8O	-H(-)	100	4-Hydroxystyrene	4-Hydroxystyrene; 4-Vinylphenol	C05627
72	119.05	1	0.841746	52669.2	0.000306636	C8H8O	-H(-)	100	p-Tolualdehyde	4-Methylbenzaldehyde; 4-Toluylaldehyde; p-Formyltoluene; p-Methylbenzaldehyde; p-Tolualdehyde	C06758
72	119.05	1	0.841746	52669.2	0.000306636	C8H8O	-H(-)	100	Acetophenone	1-Phenylethanone; Acetophenone; Acetylbenzene; Methyl phenyl ketone; Phenyl methyl ketone	C07113
72	119.05	1	0.841746	52669.2	0.000306636	C8H8O	-H(-)	100	3-Methylbenzaldehyde	3-Methylbenzaldehyde; m-Tolualdehyde	C07209
72	119.05	1	0.841746	52669.2	0.000306636	C8H8O	-H(-)	100	2-Methylbenzaldehyde	2-Formyltoluene; 2-Methylbenzaldehyde; o-Tolualdehyde; o-Toluic aldehyde	C07214
72	119.05	1	0.841746	52669.2	0.000306636	C8H8O	-H(-)	100	(S)-2-Phenyloxirane	(S)-2-Phenyloxirane; (S)-Styrene oxide	C20782
73	120.012	1	0.86381	6041.85	0.000112768	C3H7NO2S	-H(-)	100	L-Cysteine	L-2-Amino-3-mercaptopropionic acid; L-Cysteine	C00097
73	120.012	1	0.86381	6041.85	0.000112768	C3H7NO2S	-H(-)	100	Cysteine	2-Amino-3-mercaptopropionic acid; Cysteine	C00736
73	120.012	1	0.86381	6041.85	0.000112768	C3H7NO2S	-H(-)	100	D-Cysteine	D-Amino-3-mercaptopropionic acid; D-Cysteine	C00793
74	120.045	1	0.843841	6215.9	0.000109858	C7H7NO	-H(-)	100	Benzamide	Benzamide	C09815
75	120.996	1	0.564618	36157.3	0.000413287	C3H6O3S	-H(-)	100	3-Mercaptolactate	(R)-3-Mercaptolactate; 3-Mercaptolactate; L-3-Mercaptolactate	C05823
75	120.996	1	0.564618	36157.3	0.000413287	C3H6O3S	-H(-)	100	1,3-Propane sultone	1,3-Propane sultone	C19296
76	121.029	1	0.667429	52894.9	0.000185095	C7H6O2	-H(-)	100	Benzoate	Benzenecarboxylic acid; Benzoate; Benzoic acid; Dracylic acid; Phenylformic acid	C00180
76	121.029	1	0.667429	52894.9	0.000185095	C7H6O2	-H(-)	100	Aromatic acid	Aromatic acid; Aromatic carboxylic acid	C00539
76	121.029	1	0.667429	52894.9	0.000185095	C7H6O2	-H(-)	100	4-Hydroxybenzaldehyde	4-Hydroxybenzaldehyde; p-Hydroxybenzaldehyde	C00633
76	121.029	1	0.667429	52894.9	0.000185095	C7H6O2	-H(-)	100	3-Hydroxybenzaldehyde	3-Hydroxybenzaldehyde	C03067
76	121.029	1	0.667429	52894.9	0.000185095	C7H6O2	-H(-)	100	Salicylaldehyde	2-Hydroxybenzaldehyde; Salicylaldehyde; o-Hydroxybenzaldehyde	C06202
76	121.029	1	0.667429	52894.9	0.000185095	C7H6O2	-H(-)	100	Tropolone	Tropolone	C15474
77	121.04	1	0.570716	9030.59	0.000618014	C6H6N2O	-H(-)	100	Nicotinamide	Niacinamide; Nicotinamide; Nicotinic acid amide; Vitamin PP	C00153
77	121.04	1	0.570716	9030.59	0.000618014	C6H6N2O	-H(-)	100	Picolinamide	Picolinamide	C01950
77	121.04	1	0.570716	9030.59	0.000618014	C6H6N2O	-H(-)	100	Isonicotineamide	Isonicotinamide; Isonicotineamide	C02421
78	121.05	1	0.897974	8512.82	0.000260719	C4H10O4	-H(-)	100	Erythritol	Erythrite; Erythritol; Erythrol; Phycite; Phycitol	C00503
78	121.05	1	0.897974	8512.82	0.000260719	C4H10O4	-H(-)	100	D-Threitol	D-Threitol	C16884
79	122.025	1	0.478593	14383.4	0.000162279	C6H5NO2	-H(-)	100	Nicotinate	3-Pyridinecarboxylic acid; Niacin; Nicotinate; Nicotinic acid	C00253
79	122.025	1	0.478593	14383.4	0.000162279	C6H5NO2	-H(-)	100	Nitrobenzene	Nitrobenzene; Nitrobenzol	C06813
79	122.025	1	0.478593	14383.4	0.000162279	C6H5NO2	-H(-)	100	Isonicotinic acid	Isonicotinic acid	C07446
79	122.025	1	0.478593	14383.4	0.000162279	C6H5NO2	-H(-)	100	Picolinic acid	2-Pyridinecarboxylic acid; Picolinic acid	C10164
80	122.061	1	0.679643	3955.04	0.000189316	C7H9NO	-H(-)	100	ortho-Anisidine	o-Anisidine; ortho-Anisidine	C19191
80	122.061	1	0.679643	3955.04	0.000189316	C7H9NO	-H(-)	100	para-Anisidine	1-Amino-4-methoxybenzene; para-Anisidine	C19326
81	124.007	1	0.837942	1.62408e+06	0.000142074	C2H7NO3S	-H(-)	91	Taurine	2-Aminoethanesulfonic acid; Aminoethylsulfonic acid; Taurine	C00245
82	124.991	1	0.297699	58253.6	0.000713434	C2H6O4S	-H(-)	100	2-Hydroxyethanesulfonate	2-Hydroxyethane-1-sulfonic acid; 2-Hydroxyethanesulfonate; 2-Hydroxyethanesulfonic acid; Isethionate; Isethionic acid	C05123
82	124.991	1	0.297699	58253.6	0.000713434	C2H6O4S	-H(-)	100	Dimethyl sulfate	Dimethyl sulfate	C19177
82	124.991	1	0.297699	58253.6	-0.000136885	C3H8OS2	-H(-) [+2]	80	Dimercaprol	2,3-Dimercapto-1-propanol; 2,3-Mercaptopropanol; British anti-lewisite; Dimercaprol	C02924
83	125.024	1	0.748884	102614	0.000210204	C6H6O3	-H(-)	100	1,2,3-Trihydroxybenzene	1,2,3-Benzenetriol; 1,2,3-Trihydroxybenzene; Pyrogallic acid; Pyrogallol	C01108
83	125.024	1	0.748884	102614	0.000210204	C6H6O3	-H(-)	100	Phloroglucinol	1,3,5-Benzenetriol; 1,3,5-Trihydroxybenzene; Phloroglucinol	C02183
83	125.024	1	0.748884	102614	0.000210204	C6H6O3	-H(-)	100	Triacetate lactone	4-Hydroxy-6-methyl-2-pyrone; Triacetate lactone	C02752
83	125.024	1	0.748884	102614	0.000210204	C6H6O3	-H(-)	100	Benzene-1,2,4-triol	1,2,4-Benzenetriol; 1,2,4-Trihydroxybenzene; Benzene-1,2,4-triol; Hydroxyhydroquinone; Hydroxyquinol	C02814
83	125.024	1	0.748884	102614	0.000210204	C6H6O3	-H(-)	100	5-Hydroxymethyl-2-furaldehyde	5-Hydroxymethyl-2-furaldehyde; 5-Hydroxymethylfurfural; HMF	C11101
83	125.024	1	0.748884	102614	0.000210204	C6H6O3	-H(-)	100	Maltol	Maltol	C11918
83	125.024	1	0.748884	102614	0.000210204	C6H6O3	-H(-)	100	4-Hydroxy-5-methyl-2-methylenefuran-3(2H)-one	4-Hydroxy-5-methyl-2-methylenefuran-3(2H)-one	C20718
84	125.036	1	0.123394	40176.8	9.01269e-05	C5H6N2O2	-H(-)	100	Thymine	5-Methyluracil; Thymine	C00178
84	125.036	1	0.123394	40176.8	9.01269e-05	C5H6N2O2	-H(-)	100	Imidazole-4-acetate	4-Imidazoleacetate; Imidazole-4-acetate; Imidazoleacetic acid	C02835
85	125.061	1	0.647465	6149.76	0.000150692	C7H10O2	-H(-)	100	Toluene-cis-dihydrodiol	(1S,2R)-3-Methylcyclohexa-3,5-diene-1,2-diol; Toluene-cis-dihydrodiol	C04592
85	125.061	1	0.647465	6149.76	0.000150692	C7H10O2	-H(-)	100	1-Cyclohexenecarboxylic acid	1-Cyclohexene-1-carboxylic acid; 1-Cyclohexenecarboxylic acid; Cyclohex-1-enecarboxylic acid	C12101
86	126.019	1	0.875143	10630	0.000291571	C5H5NO3	-H(-)	100	2,3,6-Trihydroxypyridine	2,3,6-Trihydroxypyridine	C03458
86	126.019	1	0.875143	10630	0.000291571	C5H5NO3	-H(-)	100	5-Hydroxypyrrole-2-carboxylate	5-Hydroxypyrrole-2-carboxylate	C19721
87	126.056	1	0.610516	9201.49	0.000148823	C6H9NO2	-H(-)	100	(S)-2,3,4,5-Tetrahydropyridine-2-carboxylate	(S)-2,3,4,5-Tetrahydropyridine-2-carboxylate; delta1-Piperideine-6-L-carboxylate	C00450
87	126.056	1	0.610516	9201.49	0.000148823	C6H9NO2	-H(-)	100	delta1-Piperideine-2-carboxylate	1,2-Didehydropiperidine-2-carboxylate; delta1-Piperideine-2-carboxylate	C04092
87	126.056	1	0.610516	9201.49	0.000148823	C6H9NO2	-H(-)	100	L-Baikiain	4,5-Dehydropipecolic acid; L-Baikiain	C08268
87	126.056	1	0.610516	9201.49	0.000148823	C6H9NO2	-H(-)	100	alpha-(Methylenecyclopropyl)glycine	alpha-(Methylenecyclopropyl)glycine	C08292
87	126.056	1	0.610516	9201.49	0.000148823	C6H9NO2	-H(-)	100	Guvacine	Guvacine	C10149
87	126.056	1	0.610516	9201.49	0.000148823	C6H9NO2	-H(-)	100	Isoguvacine	Isoguvacine	C13694
88	126.092	1	0.883814	2716.64	-1.42298e-05	C7H13NO	-H(-)	100	N-Cyclohexylformamide	N-Cyclohexylformamide	C11519
89	127.015	1	0.83886	4275.64	7.96738e-05	C4H4N2O3	-H(-)	100	Barbiturate	Barbiturate; Barbituric acid; Malonylurea	C00813
90	127.021	1	0.808388	3172.26	-0.00072824	C6H5FO2	-H(-)	25	3-Fluorocatechol	3-Fluorocatechol	C16472
90	127.021	1	0.808388	3172.26	-0.00072824	C6H5FO2	-H(-)	25	4-Fluorocatechol	4-Fluorocatechol	C16473
91	127.04	1	0.852022	17210.6	-0.000118903	C6H8O3	-H(-)	100	Dihydro-4,4-dimethyl-2,3-furandione	2-Dehydropantolactone; 2-Dehydropantoyl lactone; Dihydro-4,4-dimethyl-2,3-furandione	C01125
91	127.04	1	0.852022	17210.6	-0.000118903	C6H8O3	-H(-)	100	Dihydrophloroglucinol	Dihydrophloroglucinol	C06719
91	127.04	1	0.852022	17210.6	-0.000118903	C6H8O3	-H(-)	100	(4E)-2-Oxohexenoic acid	(4E)-2-Oxohexenoic acid; 2-Oxohex-trans-4-enoate	C06761
91	127.04	1	0.852022	17210.6	-0.000118903	C6H8O3	-H(-)	100	2-Hydroxy-cis-hex-2,4-dienoate	2-Hydroxy-cis-hex-2,4-dienoate	C11354
91	127.04	1	0.852022	17210.6	-0.000118903	C6H8O3	-H(-)	100	(2Z,4Z)-2-Hydroxyhexa-2,4-dienoate	(2Z,4Z)-2-Hydroxyhexa-2,4-dienoate; (2Z,4Z)-2-Hydroxyhexa-2,4-dienoic acid	C20240
91	127.04	1	0.852022	17210.6	-0.000118903	C6H8O3	-H(-)	100	5-Hydroxymethylfurfuryl alcohol	2,5-Bis(hydroxymethyl)furan; 5-Hydroxymethylfurfuryl alcohol	C20443
91	127.04	1	0.852022	17210.6	-0.000118903	C6H8O3	-H(-)	100	4-Hydroxy-2,5-dimethylfuran-3(2H)-one	4-Hydroxy-2,5-dimethylfuran-3(2H)-one; Dimethylhydroxy furanone	C20717
92	127.051	1	0.924039	164834	0.000225639	C5H8N2O2	-H(-)	100	5,6-Dihydrothymine	5,6-Dihydro-5-methyluracil; 5,6-Dihydrothymine; Dihydrothymine	C00906
92	127.051	1	0.924039	164834	0.000225639	C5H8N2O2	-H(-)	100	gamma-Amino-gamma-cyanobutanoate	4-Amino-4-cyanobutanoic acid; gamma-Amino-gamma-cyanobutanoate	C05715
92	127.051	1	0.924039	164834	0.000225639	C5H8N2O2	-H(-)	100	alpha-Amino-gamma-cyanobutanoate	2-Amino-4-cyanobutanoic acid; alpha-Amino-gamma-cyanobutanoate	C05717
93	127.076	1	0.872014	11045.7	0.000245235	C7H12O2	-H(-)	100	Ethyl tiglate	(E)-2-Methyl-2-butenoic acid ethyl ester; Ethyl 2-methylbut-2-enoate; Ethyl tiglate	C08487
93	127.076	1	0.872014	11045.7	0.000245235	C7H12O2	-H(-)	100	Cyclohexane-1-carboxylate	Cyclohexane-1-carboxylate; Cyclohexanecarboxylic acid; Hexahydrobenzoic acid	C09822
93	127.076	1	0.872014	11045.7	0.000245235	C7H12O2	-H(-)	100	Butyl acrylate	Butyl acrylate	C10921
93	127.076	1	0.872014	11045.7	0.000245235	C7H12O2	-H(-)	100	1-Oxa-2-oxo-3-methylcycloheptane	1-Oxa-2-oxo-3-methylcycloheptane	C10976
93	127.076	1	0.872014	11045.7	0.000245235	C7H12O2	-H(-)	100	3-Isopropyl-3-butenoic acid	3-Isopropyl-3-butenoic acid; 3-Isopropylbut-3-enoic acid	C11950
93	127.076	1	0.872014	11045.7	0.000245235	C7H12O2	-H(-)	100	alpha-EMGBL	2-Ethyl-2-methyl-4-butyrolactone; alpha-EMGBL	C13714
93	127.076	1	0.872014	11045.7	0.000245235	C7H12O2	-H(-)	100	beta-EMGBL	beta-EMGBL; beta-Ethyl-beta-methyl-gamma-butyrolactone	C13717
94	127.113	1	0.874895	1944.98	1.46152e-05	C8H16O	-H(-)	100	1-Octanal	1-Caprylaldehyde; 1-Octaldehyde; 1-Octanal; 1-Octylaldehyde	C01545
94	127.113	1	0.874895	1944.98	1.46152e-05	C8H16O	-H(-)	100	Sulcatol	6-Methyl-5-hepten-2-ol; 6-Methylhept-5-en-2-ol; Sulcatol	C07288
94	127.113	1	0.874895	1944.98	1.46152e-05	C8H16O	-H(-)	100	1-Octen-3-ol	1-Octen-3-ol	C14272
94	127.113	1	0.874895	1944.98	1.46152e-05	C8H16O	-H(-)	100	3-Octanone	3-Octanone	C17145
95	128.035	1	0.937839	453764	0.000118496	C5H7NO3	-H(-)	100	4-Oxoproline	4-Oxo-L-proline; 4-Oxoproline	C01877
95	128.035	1	0.937839	453764	0.000118496	C5H7NO3	-H(-)	100	Pidolic acid	5-Oxo-L-proline; 5-Oxoproline; 5-Pyrrolidone-2-carboxylic acid; L-5-Pyrrolidone-2-carboxylic acid; L-Pyroglutamic acid; Pidolic acid; Pyroglutamate; Pyroglutamic acid	C01879
95	128.035	1	0.937839	453764	0.000118496	C5H7NO3	-H(-)	100	5-Oxo-D-proline	5-Oxo-D-proline; D-5-Pyrrolidone-2-carboxylic acid; D-Pyroglutamic acid	C02237
95	128.035	1	0.937839	453764	0.000118496	C5H7NO3	-H(-)	100	L-1-Pyrroline-3-hydroxy-5-carboxylate	(3R,5S)-1-Pyrroline-3-hydroxy-5-carboxylate; 3-Hydroxy-L-1-pyrroline-5-carboxylate; L-1-Pyrroline-3-hydroxy-5-carboxylate	C04281
95	128.035	1	0.937839	453764	0.000118496	C5H7NO3	-H(-)	100	1-Pyrroline-4-hydroxy-2-carboxylate	1-Pyrroline-4-hydroxy-2-carboxylate	C04282
96	128.071	1	0.827303	39681.6	0.000337471	C6H11NO2	-H(-)	100	L-Pipecolate	(S)-Piperidine-2-carboxylic acid; 2-Piperidinecarboxylic acid; L-Pipecolate; Pipecolic acid; Pipecolinic acid	C00408
96	128.071	1	0.827303	39681.6	0.000337471	C6H11NO2	-H(-)	100	1-Aminocyclopentanecarboxylate	1-Aminocyclopentanecarboxylate; 1-Aminocyclopentanecarboxylic acid; Cycloleucine	C03969
96	128.071	1	0.827303	39681.6	0.000337471	C6H11NO2	-H(-)	100	N4-Acetylaminobutanal	4-Acetamidobutanal; N4-Acetylaminobutanal	C05936
96	128.071	1	0.827303	39681.6	0.000337471	C6H11NO2	-H(-)	100	Vigabatrin	Vigabatrin	C07500
96	128.071	1	0.827303	39681.6	0.000337471	C6H11NO2	-H(-)	100	trans-3-Aminocyclopentane-1-carboxylic acid	trans-3-Aminocyclopentane-1-carboxylic acid	C13696
97	128.108	1	0.896889	4693.65	0.000172086	C7H15NO	-H(-)	100	N-Methylhexanamide	N-Methylhexanamide	C02722
98	129.019	1	0.900619	138325	7.78374e-05	C5H6O4	-H(-)	100	2,5-Dioxopentanoate	2,5-Dioxopentanoate; 2-Oxoglutarate semialdehyde	C00433
98	129.019	1	0.900619	138325	7.78374e-05	C5H6O4	-H(-)	100	Itaconate	Itaconate; Itaconic acid; Methylenesuccinic acid	C00490
98	129.019	1	0.900619	138325	7.78374e-05	C5H6O4	-H(-)	100	Mesaconate	(E)-2-Methyl-2-butenedioic acid; 2-Methylfumarate; Mesaconate; Mesaconic acid; Methylfumaric acid	C01732
98	129.019	1	0.900619	138325	7.78374e-05	C5H6O4	-H(-)	100	Acetylpyruvate	2,4-Dioxopentanoate; Acetylpyruvate; Acetylpyruvic acid	C02132
98	129.019	1	0.900619	138325	7.78374e-05	C5H6O4	-H(-)	100	(E)-Glutaconate	(E)-Glutaconate; Glutaconic acid; trans-Glutaconate; trans-Glutaconic acid	C02214
98	129.019	1	0.900619	138325	7.78374e-05	C5H6O4	-H(-)	100	2-Methylmaleate	2-Methylmaleate; Citraconate; Citraconic acid; Methylmaleic acid	C02226
98	129.019	1	0.900619	138325	7.78374e-05	C5H6O4	-H(-)	100	4,5-Dioxopentanoate	4,5-Dioxopentanoate; 4-Oxoglutarate semialdehyde	C02800
99	129.055	1	0.82734	22393.2	0.000220869	C6H10O3	-H(-)	100	4-Methyl-2-oxopentanoate	2-Oxoisocaproate; 4-Methyl-2-oxopentanoate	C00233
99	129.055	1	0.82734	22393.2	0.000220869	C6H10O3	-H(-)	100	(S)-3-Methyl-2-oxopentanoic acid	(3S)-3-Methyl-2-oxopentanoate; (3S)-3-Methyl-2-oxopentanoic acid; (S)-3-Methyl-2-oxopentanoate; (S)-3-Methyl-2-oxopentanoic acid	C00671
99	129.055	1	0.82734	22393.2	0.000220869	C6H10O3	-H(-)	100	2-Oxohexanoic acid	2-Oxohexanoate; 2-Oxohexanoic acid; alpha-Ketocaproic acid	C00902
99	129.055	1	0.82734	22393.2	0.000220869	C6H10O3	-H(-)	100	(R)-Pantolactone	(3R)-Dihydro-3-hydroxy-4,4-dimethyl-2(3H)-furanone; (R)-Pantolactone; (R)-Pantoyl lactone	C01012
99	129.055	1	0.82734	22393.2	0.000220869	C6H10O3	-H(-)	100	3-Oxohexanoic acid	3-Oxohexanoate; 3-Oxohexanoic acid	C02122
99	129.055	1	0.82734	22393.2	0.000220869	C6H10O3	-H(-)	100	5-Oxohexanoic acid	4-Acetylbutyric acid; 5-Oxohexanoate; 5-Oxohexanoic acid	C02129
99	129.055	1	0.82734	22393.2	0.000220869	C6H10O3	-H(-)	100	6-Hydroxyhexan-6-olide	6-Hydroxy-6-hexanolactone; 6-Hydroxyhexan-6-olide	C03241
99	129.055	1	0.82734	22393.2	0.000220869	C6H10O3	-H(-)	100	3-Methyl-2-oxopentanoate	2-Oxo-3-methylvalerate; 3-Methyl-2-oxopentanoate	C03465
99	129.055	1	0.82734	22393.2	0.000220869	C6H10O3	-H(-)	100	beta-Ketoisocaproate	3-Oxo-4-methylpentanoate; 4-Methyl-3-oxopentanoic acid; beta-Ketoisocaproate; beta-Ketoisocaproic acid	C03467
99	129.055	1	0.82734	22393.2	0.000220869	C6H10O3	-H(-)	100	Ethyl 3-oxobutanoate	Ethyl 3-oxobutanoate; Ethyl acetoacetate	C03500
99	129.055	1	0.82734	22393.2	0.000220869	C6H10O3	-H(-)	100	(3R)-3-Methyl-2-oxopentanoic acid	(3R)-3-Methyl-2-oxopentanoic acid; (R)-2-Oxo-3-methylpentanoate; (R)-2-Oxo-3-methylpentanoic acid	C06008
99	129.055	1	0.82734	22393.2	0.000220869	C6H10O3	-H(-)	100	Adipate semialdehyde	6-Oxohexanoate; 6-Oxohexanoic acid; Adipate semialdehyde; Hexan-1-one-6-carboxylate	C06102
99	129.055	1	0.82734	22393.2	0.000220869	C6H10O3	-H(-)	100	1-Oxa-2-oxo-3-hydroxycycloheptane	1-Oxa-2-oxo-3-hydroxycycloheptane	C12314
99	129.055	1	0.82734	22393.2	0.000220869	C6H10O3	-H(-)	100	2-Hydroxyethyl methacrylate	2-Hydroxyethyl methacrylate; HEMA	C14530
100	129.092	1	0.711848	7115.89	8.46374e-05	C7H14O2	-H(-)	100	Ethyl isovalerate	Ethyl isovalerate	C12290
100	129.092	1	0.711848	7115.89	8.46374e-05	C7H14O2	-H(-)	100	Isoamyl acetate	Isoamyl acetate	C12296
100	129.092	1	0.711848	7115.89	8.46374e-05	C7H14O2	-H(-)	100	Heptanoic acid	Heptanoic acid	C17714
101	129.103	1	0.892345	5932.81	0.000268512	C6H14N2O	-H(-)	100	N-Acetylputrescine	N-Acetylputrescine	C02714
101	129.103	1	0.892345	5932.81	0.000268512	C6H14N2O	-H(-)	100	N-Nitrosodi-n-propylamine	N-Nitrosodi-n-propylamine	C19279
102	130.051	1	0.934563	141138	-2.30182e-05	C5H9NO3	-H(-)	100	5-Aminolevulinate	5-Amino-4-oxopentanoate; 5-Amino-4-oxovaleric acid; 5-Aminolevulinate	C00430
102	130.051	1	0.934563	141138	-2.30182e-05	C5H9NO3	-H(-)	100	cis-4-Hydroxy-L-proline	L-Allohydroxyproline; cis-4-Hydroxy-L-proline	C01015
102	130.051	1	0.934563	141138	-2.30182e-05	C5H9NO3	-H(-)	100	N-Acetyl-beta-alanine	N-Acetyl-beta-alanine	C01073
102	130.051	1	0.934563	141138	-2.30182e-05	C5H9NO3	-H(-)	100	5-Amino-2-oxopentanoic acid	2-Oxo-5-amino-pentanoate; 2-Oxo-5-aminopentanoate; 2-Oxo-5-aminovalerate; 5-Amino-2-oxopentanoate; 5-Amino-2-oxopentanoic acid; alpha-Keto-delta-aminopentanoate	C01110
102	130.051	1	0.934563	141138	-2.30182e-05	C5H9NO3	-H(-)	100	Hydroxyproline	Hydroxyproline; L-Hydroxyproline; trans-4-Hydroxy-L-proline	C01157
102	130.051	1	0.934563	141138	-2.30182e-05	C5H9NO3	-H(-)	100	L-Glutamate 5-semialdehyde	L-Glutamate 5-semialdehyde; L-Glutamate gamma-semialdehyde	C01165
102	130.051	1	0.934563	141138	-2.30182e-05	C5H9NO3	-H(-)	100	2-Amino-4-oxopentanoic acid	2-Amino-4-oxopentanoate; 2-Amino-4-oxopentanoic acid	C03341
102	130.051	1	0.934563	141138	-2.30182e-05	C5H9NO3	-H(-)	100	cis-4-Hydroxy-D-proline	cis-4-Hydroxy-D-proline	C03440
102	130.051	1	0.934563	141138	-2.30182e-05	C5H9NO3	-H(-)	100	trans-4-Hydroxy-D-proline	trans-4-Hydroxy-D-proline	C03651
102	130.051	1	0.934563	141138	-2.30182e-05	C5H9NO3	-H(-)	100	(S)-4-Amino-5-oxopentanoate	(S)-4-Amino-5-oxopentanoate; L-Glutamate 1-semialdehyde	C03741
102	130.051	1	0.934563	141138	-2.30182e-05	C5H9NO3	-H(-)	100	trans-3-Hydroxy-L-proline	trans-3-Hydroxy-L-proline; trans-L-3-Hydroxyproline	C05147
102	130.051	1	0.934563	141138	-2.30182e-05	C5H9NO3	-H(-)	100	cis-3-Hydroxy-L-proline	cis-3-Hydroxy-L-proline; cis-3-Hydroxyproline	C19706
103	130.087	1	0.947633	641560	0.000143457	C6H13NO2	-H(-)	100	L-Leucine	(2S)-alpha-2-Amino-4-methylvaleric acid; (2S)-alpha-Leucine; 2-Amino-4-methylvaleric acid; L-Leucine	C00123
103	130.087	1	0.947633	641560	0.000143457	C6H13NO2	-H(-)	100	L-Isoleucine	2-Amino-3-methylvaleric acid; L-Isoleucine	C00407
103	130.087	1	0.947633	641560	0.000143457	C6H13NO2	-H(-)	100	D-Leucine	D-2-Amino-4-methylvaleric acid; D-Leucine	C01570
103	130.087	1	0.947633	641560	0.000143457	C6H13NO2	-H(-)	100	L-Norleucine	(S)-2-Aminohexanoic acid; L-2-Aminohexanoate; L-2-Aminohexanoic acid; L-Aminohexanoate; L-Aminohexanoic acid; L-Norleucine	C01933
103	130.087	1	0.947633	641560	0.000143457	C6H13NO2	-H(-)	100	6-Aminohexanoate	6-Aminocaproic acid; 6-Aminohexanoate; 6-Aminohexanoic acid; Epsilcapramine	C02378
103	130.087	1	0.947633	641560	0.000143457	C6H13NO2	-H(-)	100	(3R)-beta-Leucine	(3R)-3-Amino-4-methylpentanoic acid; (3R)-3-Amino-4-methylvaleric acid; (3R)-beta-Leucine	C02486
103	130.087	1	0.947633	641560	0.000143457	C6H13NO2	-H(-)	100	D-Isoleucine	(2R,3R)-2-Amino-3-methylvaleric acid; D-Isoleucine	C06418
103	130.087	1	0.947633	641560	0.000143457	C6H13NO2	-H(-)	100	beta-Alaninebetaine	Propiobetaine; Trimethylalanine; beta-Alanine betaine; beta-Alaninebetaine	C08263
103	130.087	1	0.947633	641560	0.000143457	C6H13NO2	-H(-)	100	Isoleucine	Isoleucine	C16434
103	130.087	1	0.947633	641560	0.000143457	C6H13NO2	-H(-)	100	Leucine	Leucine	C16439
103	130.087	1	0.947633	641560	0.000143457	C6H13NO2	-H(-)	100	N,N-Diethylglycine	N,N-Diethylglycine	C16647
104	131.018	1	0.685546	3931.88	-0.000796828	C5H8O2S	-H(-)	100	THTC	2-n-Tetrahydrothiophenecarboxylic acid; THTC	C11074
104	131.018	1	0.685546	3931.88	-0.000513497	C4H5NO4	-H(-) [+1]	55	2-Oxosuccinamate	2-Oxosuccinamate; 2-Oxosuccinamic acid; Oxaloacetamide; gamma-Aminooxaloacetate	C02362
104	131.018	1	0.685546	3931.88	-0.000513497	C4H5NO4	-H(-) [+1]	55	Iminoaspartate	Iminoaspartate; Iminoaspartic acid; Iminosuccinate	C05840
104	131.018	1	0.685546	3931.88	-0.000513497	C4H5NO4.	-H(-) [+1]	55	Calcium L-aspartate	Calcium L-aspartate	C13058
105	131.035	1	0.905952	58776	-2.54024e-05	C5H8O4	-H(-)	100	Glutarate	1,3-Propanedicarboxylic acid; Glutarate; Glutaric acid; Pentanedioic acid	C00489
105	131.035	1	0.905952	58776	-2.54024e-05	C5H8O4	-H(-)	100	2-Acetolactate	2-Acetolactate	C00900
105	131.035	1	0.905952	58776	-2.54024e-05	C5H8O4	-H(-)	100	Deoxyribonolactone	2-Deoxyribonolactone; Deoxyribonolactone	C02674
105	131.035	1	0.905952	58776	-2.54024e-05	C5H8O4	-H(-)	100	4-Hydroxy-2-oxopentanoate	4-Hydroxy-2-oxopentanoate; 4-Hydroxy-2-oxovalerate	C03589
105	131.035	1	0.905952	58776	-2.54024e-05	C5H8O4	-H(-)	100	2-(Hydroxymethyl)-4-oxobutanoate	2-(Hydroxymethyl)-4-oxobutanoate; 2-Hydroxymethyl succinate semialdehyde; alpha-Hydroxymethyl succinate semialdehyde	C04106
105	131.035	1	0.905952	58776	-2.54024e-05	C5H8O4	-H(-)	100	3-Hydroxy-3-methyl-2-oxobutanoic acid	2-Oxo-3-hydroxyisovalerate; 3-Hydroxy-3-methyl-2-oxobutanoate; 3-Hydroxy-3-methyl-2-oxobutanoic acid	C04181
105	131.035	1	0.905952	58776	-2.54024e-05	C5H8O4	-H(-)	100	(S)-2-Acetolactate	(S)-2-Acetolactate; (S)-2-Hydroxy-2-methyl-3-oxobutanoate	C06010
105	131.035	1	0.905952	58776	-2.54024e-05	C5H8O4	-H(-)	100	(4S)-4,5-Dihydroxypentan-2,3-dione	(4S)-4,5-Dihydroxypentan-2,3-dione	C11838
106	131.046	1	0.932289	92357.5	0.000156877	C4H8N2O3	-H(-)	100	L-Asparagine	2-Aminosuccinamic acid; L-Asparagine	C00152
106	131.046	1	0.932289	92357.5	0.000156877	C4H8N2O3	-H(-)	100	N-Carbamoylsarcosine	N-Carbamoylsarcosine	C01043
106	131.046	1	0.932289	92357.5	0.000156877	C4H8N2O3	-H(-)	100	D-Asparagine	D-Asparagine	C01905
106	131.046	1	0.932289	92357.5	0.000156877	C4H8N2O3	-H(-)	100	Glycylglycine	Glycylglycine; N-Glycylglycine	C02037
106	131.046	1	0.932289	92357.5	0.000156877	C4H8N2O3	-H(-)	100	3-Ureidopropionate	3-Ureidopropanoate; 3-Ureidopropionate; N-Carbamoyl-beta-alanine; beta-Ureidopropionic acid	C02642
106	131.046	1	0.932289	92357.5	0.000156877	C4H8N2O3	-H(-)	100	Asparagine	Asparagine	C16438
106	131.046	1	0.932289	92357.5	0.000156877	C4H8N2O3	-H(-)	100	Methylazoxymethanol acetate	Methylazoxymethanol acetate	C19258
106	131.046	1	0.932289	92357.5	0.000156877	C4H8N2O3	-H(-)	100	N-Nitroso-N-methylurethane	N-Nitroso-N-methylurethane	C19301
107	131.071	1	0.869202	79401.4	5.88319e-05	C6H12O3	-H(-)	100	D-2-Hydroxyisocaproate	D-2-Hydroxyisocaproate	C03264
107	131.071	1	0.869202	79401.4	5.88319e-05	C6H12O3	-H(-)	100	Ethyl (R)-3-hydroxybutanoate	Ethyl (R)-3-hydroxybutanoate	C03499
107	131.071	1	0.869202	79401.4	5.88319e-05	C6H12O3	-H(-)	100	6-Hydroxyhexanoic acid	6-Hydroxyhexanoate; 6-Hydroxyhexanoic acid	C06103
107	131.071	1	0.869202	79401.4	5.88319e-05	C6H12O3	-H(-)	100	Paraldehyde	Paraldehyde	C07834
108	131.082	1	0.805952	142715	0.000341338	C5H12N2O2	-H(-)	100	L-Ornithine	(S)-2,5-Diaminopentanoate; (S)-2,5-Diaminopentanoic acid; (S)-2,5-Diaminovaleric acid; L-Ornithine	C00077
108	131.082	1	0.805952	142715	0.000341338	C5H12N2O2	-H(-)	100	D-Ornithine	D-Ornithine	C00515
108	131.082	1	0.805952	142715	0.000341338	C5H12N2O2	-H(-)	100	Ornithine	2,5-Diaminopentanoate; 2,5-Diaminopentanoic acid; 2,5-Diaminovaleric acid; Ornithine	C01602
108	131.082	1	0.805952	142715	0.000341338	C5H12N2O2	-H(-)	100	(2R,4S)-2,4-Diaminopentanoate	(2R,4S)-2,4-Diaminopentanoate; 2,4-Diaminopentanoate; D-threo-2,4-Diaminopentanoate	C03943
108	131.082	1	0.805952	142715	0.000341338	C5H12N2O2.	-H(-)	100	D-Ornithine hydrochloride	D-Ornithine hydrochloride	C11320
109	132.03	1	0.902758	75263.4	0.000123607	C4H7NO4	-H(-)	100	L-Aspartate	2-Aminosuccinic acid; L-Asp; L-Aspartate; L-Aspartic acid	C00049
109	132.03	1	0.902758	75263.4	0.000123607	C4H7NO4	-H(-)	100	D-Aspartate	D-Aspartate; D-Aspartic acid	C00402
109	132.03	1	0.902758	75263.4	0.000123607	C4H7NO4	-H(-)	100	Aspartate	Aspartate; Aspartic acid	C16433
109	132.03	1	0.902758	75263.4	0.000123607	C4H7NO4	-H(-)	100	Iminodiacetate	Iminodiacetate	C19911
110	132.066	1	0.900552	24429.1	0.000293241	C5H11NO3	-H(-)	100	N-Hydroxy-L-valine	N-Hydroxy-L-valine	C20313
111	133.014	1	0.854761	392619	0.00028552	C4H6O5	-H(-)	100	(S)-Malate	(S)-Malate; L-2-Hydroxybutanedioic acid; L-Apple acid; L-Malate; L-Malic acid; Malate; Malic acid	C00149
111	133.014	1	0.854761	392619	0.00028552	C4H6O5	-H(-)	100	(R)-Malate	(R)-Malate; D-Malate; D-Malic acid	C00497
111	133.014	1	0.854761	392619	0.00028552	C4H6O5	-H(-)	100	Malate	2-Hydroxybutanedioic acid; Malate; Malic acid	C00711
111	133.014	1	0.854761	392619	0.00028552	C4H6O5	-H(-)	100	3-Dehydro-L-threonate	3-Dehydro-L-threonate	C03064
112	133.051	1	0.888019	26674.3	9.52442e-05	C5H10O4	-H(-)	100	Deoxyribose	2-Deoxy-D-erythro-pentose; 2-Deoxy-D-ribose; Deoxyribose; Thyminose	C01801
112	133.051	1	0.888019	26674.3	9.52442e-05	C5H10O4	-H(-)	100	2-Deoxy-L-arabinose	2-Deoxy-L-arabinose	C02783
112	133.051	1	0.888019	26674.3	9.52442e-05	C5H10O4	-H(-)	100	2,3-Dihydroxy-3-methylbutanoate	2,3-Dihydroxy-3-methylbutanoate; 2,3-Dihydroxy-isovalerate; 2,3-Dihydroxy-isovaleric acid	C04039
112	133.051	1	0.888019	26674.3	9.52442e-05	C5H10O4	-H(-)	100	(R)-2,3-Dihydroxy-3-methylbutanoate	(2R)-2,3-Dihydroxy-3-methylbutanoate; (R)-2,3-Dihydroxy-3-methylbutanoate; (R)-2,3-Dihydroxy-isovalerate; (R)-2,3-Dihydroxy-isovaleric acid	C04272
112	133.051	1	0.888019	26674.3	9.52442e-05	C5H10O4	-H(-)	100	1-Deoxy-D-xylulose	1-Deoxy-D-xylulose	C06257
112	133.051	1	0.888019	26674.3	9.52442e-05	C5H10O4	-H(-)	100	2-Deoxy-alpha-D-ribopyranose	2-Deoxy-alpha-D-ribopyranose	C08347
112	133.051	1	0.888019	26674.3	0.000860946	C5H11NOS	-H(-) [+1]	52	4-Methylthiobutanaldoxime	4-Methylthiobutanaldoxime	C17241
113	135.03	1	0.906959	132513	-0.000424328	C4H8O5	-H(-)	100	Threonate	(2R,3S)-2,3,4-Trihydroxybutanoic acid; L-Threonate; Threonate	C01620
113	135.03	1	0.906959	132513	0.000913672	C5H4N4O	-H(-)	100	Hypoxanthine	Hypoxanthine; Purine-6-ol	C00262
114	135.045	1	0.867525	102733	0.000310119	C8H8O2	-H(-)	100	Phenyl acetate	Acetic acid,phenyl ester; Acetylphenol; Phenyl acetate	C00548
114	135.045	1	0.867525	102733	0.000310119	C8H8O2	-H(-)	100	Toluate	4-Methylbenzoic acid; Crithminic acid; Toluate; Toluenecarboxylic acid; p-Toluate; p-Toluic acid	C01454
114	135.045	1	0.867525	102733	0.000310119	C8H8O2	-H(-)	100	4-Hydroxyphenylacetaldehyde	2-(4-Hydroxyphenyl)acetaldehyde; 4-Hydroxyphenylacetaldehyde	C03765
114	135.045	1	0.867525	102733	0.000310119	C8H8O2	-H(-)	100	Benzylformate	Benzylformate	C05613
114	135.045	1	0.867525	102733	0.000310119	C8H8O2	-H(-)	100	3,4-Dihydroxystyrene	3,4-Dihydroxystyrene	C06224
114	135.045	1	0.867525	102733	0.000310119	C8H8O2	-H(-)	100	3-Vinylcatechol	3-Vinylcatechol	C07085
114	135.045	1	0.867525	102733	0.000310119	C8H8O2	-H(-)	100	Phenylacetic acid	Benzeneacetic acid; Benzylformic acid; Phenylacetate; Phenylacetic acid	C07086
114	135.045	1	0.867525	102733	0.000310119	C8H8O2	-H(-)	100	2-Hydroxyacetophenone	2-Hydroxyacetophenone; omega-Hydroxyacetophenone	C07189
114	135.045	1	0.867525	102733	0.000310119	C8H8O2	-H(-)	100	m-Methylbenzoate	beta-Bethylbenzoic acid; m-Methylbenzoate; m-Toluic Acid; m-Toluylic acid	C07211
114	135.045	1	0.867525	102733	0.000310119	C8H8O2	-H(-)	100	o-Toluate	2-Methylbenzoic acid; o-Methylbenzoate; o-Toluate; o-Toluic Acid	C07215
114	135.045	1	0.867525	102733	0.000310119	C8H8O2	-H(-)	100	4'-Hydroxyacetophenone	(4-Hydroxyphenyl)ethan-1-one; 4'-Hydroxyacetophenone	C10700
114	135.045	1	0.867525	102733	0.000310119	C8H8O2	-H(-)	100	p-Anisaldehyde	p-Anisaldehyde	C10761
114	135.045	1	0.867525	102733	0.000310119	C8H8O2	-H(-)	100	3-Methylsalicylaldehyde	2-Hydroxy-3-methylbenzaldehyde; 3-Methylsalicylaldehyde	C14087
114	135.045	1	0.867525	102733	0.000310119	C8H8O2	-H(-)	100	Phenyl acetate	Phenyl acetate	C15583
114	135.045	1	0.867525	102733	0.000310119	C8H8O2	-H(-)	100	Methyl benzoate	Methyl benzoate	C20645
115	136.04	1	0.538411	31246.6	6.67661e-05	C7H7NO2	-H(-)	100	2-Aminobenzoate	2-Aminobenzoate; Anthranilate; Anthranilic acid; Vitamin L1; o-Aminobenzoic acid	C00108
115	136.04	1	0.538411	31246.6	6.67661e-05	C7H7NO2	-H(-)	100	4-Aminobenzoate	4-Aminobenzoate; 4-Aminobenzoic acid; ABEE; p-Aminobenzoate	C00568
115	136.04	1	0.538411	31246.6	6.67661e-05	C7H7NO2	-H(-)	100	N-Methylnicotinate	1-Methylpyridinio-3-carboxylate; Betaine nicotinate; Caffearin; Gynesine; N-Methylnicotinate; Trigenelline; Trigonelline	C01004
115	136.04	1	0.538411	31246.6	6.67661e-05	C7H7NO2	-H(-)	100	4-Nitrotoluene	1-Methyl-4-nitrobenzene; 4-Nitrotoluene	C14394
115	136.04	1	0.538411	31246.6	6.67661e-05	C7H7NO2	-H(-)	100	3-Nitrotoluene	3-Nitrotoluene	C19486
115	136.04	1	0.538411	31246.6	6.67661e-05	C7H7NO2	-H(-)	100	2-Nitrotoluene	2-Nitrotoluene	C19597
116	136.077	1	0.840702	3585.58	2.3427e-05	C8H11NO	-H(-)	100	Tyramine	2-(p-Hydroxyphenyl)ethylamine; Tyramine	C00483
116	136.077	1	0.840702	3585.58	2.3427e-05	C8H11NO	-H(-)	100	N,N-Dimethylaniline N-oxide	N,N-Dimethylaniline N-oxide	C01183
116	136.077	1	0.840702	3585.58	2.3427e-05	C8H11NO	-H(-)	100	Phenylethanolamine	2-Amino-1-phenylethanol; Phenylethanolamine	C02735
116	136.077	1	0.840702	3585.58	2.3427e-05	C8H11NO	-H(-)	100	1-(p-Hydroxyphenyl)ethylamine	1-(p-Hydroxyphenyl)ethylamine	C03473
116	136.077	1	0.840702	3585.58	2.3427e-05	C8H11NO	-H(-)	100	4-Hydroxy-2,6-dimethylaniline	3,5-Dimethyl-4-aminophenol; 4-Hydroxy-2,6-dimethylaniline	C16570
116	136.077	1	0.840702	3585.58	2.3427e-05	C8H11NO	-H(-)	100	Methyridine	Methyridine	C18396
116	136.077	1	0.840702	3585.58	2.3427e-05	C8H11NO	-H(-)	100	para-Cresidine	p-Cresidine; para-Cresidine	C19216
116	136.077	1	0.840702	3585.58	2.3427e-05	C8H11NO	-H(-)	100	meta-Cresidine	4-Methoxy-2-methyl-benzenamine; m-Cresidine; meta-Cresidine	C19376
117	137.097	1	0.342212	17870	2.4335e-05	C9H14O	-H(-)	100	Isophorone	1,1,3-Trimethyl-3-cyclohexene-5-one; Isophorone	C14743
117	137.097	1	0.342212	17870	2.4335e-05	C9H14O	-H(-)	100	3,6-Nonadienal	3,6-Nonadienal	C16323
118	140.012	1	0.639788	76679.3	9.20124e-05	C2H8NO4P	-H(-)	100	Ethanolamine phosphate	Ethanolamine phosphate; O-Phosphoethanolamine; O-Phosphorylethanolamine; Phosphoethanolamine	C00346
118	140.012	1	0.639788	76679.3	9.20124e-05	C2H8NO4P	-H(-)	100	1-Hydroxy-2-aminoethylphosphonate	1-Hydroxy-2-aminoethylphosphonate	C05678
119	140.072	1	0.727172	4845.53	0.000192258	C7H11NO2	-H(-)	100	Ethosuximide	Ethosuximide	C07505
119	140.072	1	0.727172	4845.53	0.000192258	C7H11NO2	-H(-)	100	Hypoglycin	Hypoglycin; Hypoglycin A; Hypoglycine A; L-Hypoglycin	C08287
119	140.072	1	0.727172	4845.53	0.000192258	C7H11NO2	-H(-)	100	Arecaidine	Arecaidine	C10128
119	140.072	1	0.727172	4845.53	0.000192258	C7H11NO2	-H(-)	100	Guvacoline	Guvacoline	C16821
120	140.108	1	0.755315	1955.74	4.00465e-05	C8H15NO	-H(-)	100	Tropine	3alpha-Tropanol; Tropine	C00729
120	140.108	1	0.755315	1955.74	4.00465e-05	C8H15NO	-H(-)	100	Pseudotropine	Pseudotropine	C02066
120	140.108	1	0.755315	1955.74	4.00465e-05	C8H15NO	-H(-)	100	Hygrine	(+)-Hygrine; Hygrine	C06179
120	140.108	1	0.755315	1955.74	4.00465e-05	C8H15NO	-H(-)	100	Pelletierine	Pelletierine	C06182
120	140.108	1	0.755315	1955.74	4.00465e-05	C8H15NO	-H(-)	100	Physoperuvine	Physoperuvine	C10864
120	140.108	1	0.755315	1955.74	4.00465e-05	C8H15NO	-H(-)	100	(-)-Hygrine	(-)-Hygrine	C11359
120	140.108	1	0.755315	1955.74	4.00465e-05	C8H15NO	-H(-)	100	Trachelanthamidine	Trachelanthamidine	C12440
121	141.055	1	0.606256	4243.4	0.000284927	C7H10O3	-H(-)	100	4-Oxocyclohexanecarboxylate	4-Oxocyclohexanecarboxylate	C03767
122	141.067	1	0.752437	8178.94	5.67432e-05	C6H10N2O2	-H(-)	100	Ectoine	Ectoine; L-Ectoine	C06231
123	141.092	1	0.825206	9433.9	0.000399016	C8H14O2	-H(-)	100	Cycloheptanecarboxylic acid	Cycloheptanecarboxylic acid; Cycloheptanoic acid	C12104
123	141.092	1	0.825206	9433.9	0.000399016	C8H14O2	-H(-)	100	Cyclohexyl acetate	Cyclohexyl acetate	C12297
123	141.092	1	0.825206	9433.9	0.000399016	C8H14O2	-H(-)	100	2-n-Propyl-4-pentenoic acid	2-n-Propyl-4-pentenoic acid; 4-En-valproic acid; 4-Ene-VPA	C16648
123	141.092	1	0.825206	9433.9	0.000399016	C8H14O2	-H(-)	100	2-n-Propyl-2-pentenoic acid	2-En-valproic acid; 2-Ene-VPA; 2-n-Propyl-2-pentenoic acid	C16653
123	141.092	1	0.825206	9433.9	0.000399016	C8H14O2	-H(-)	100	2-n-Propyl-3-pentenoic acid	2-n-Propyl-3-pentenoic acid; 3-En-valproic acid; 3-Ene-VPA	C16654
123	141.092	1	0.825206	9433.9	0.000399016	C8H14O2	-H(-)	100	Allyl isovalerate	Allyl isovalerate	C19318
123	141.092	1	0.825206	9433.9	0.000399016	C8H14O2	-H(-)	100	(Z)-3-Hexen-1-ol acetate	(3Z)-Hex-3-en-1-yl acetate; (Z)-3-Hexen-1-ol acetate; cis-3-Hexenyl acetate	C19757
124	142.051	1	0.742979	31563.2	8.47362e-06	C6H9NO3	-H(-)	100	2-Hydroxymethylclavam	2-Hydroxymethylclavam	C17357
125	143.035	1	0.884296	83504.4	0.000323324	C6H8O4	-H(-)	100	2,3-Dimethylmaleate	2,3-Dimethylmaleate; Dimethylmaleic acid	C00922
125	143.035	1	0.884296	83504.4	0.000323324	C6H8O4	-H(-)	100	Triacetate	3,5-Dioxo-hexanoic acid; Triacetate	C01757
125	143.035	1	0.884296	83504.4	0.000323324	C6H8O4	-H(-)	100	Methylitaconate	2-Methylene-3-methylsuccinate; Methylitaconate	C02295
125	143.035	1	0.884296	83504.4	0.000323324	C6H8O4	-H(-)	100	2-Methyleneglutarate	2-Methyleneglutarate; alpha-Methylene glutarate	C02930
125	143.035	1	0.884296	83504.4	0.000323324	C6H8O4	-H(-)	100	2-Hydroxy-2-(hydroxymethyl)-2H-pyran-3(6H)-one	2-Hydroxy-2-(hydroxymethyl)-2H-pyran-3(6H)-one; Microthecin	C19821
125	143.035	1	0.884296	83504.4	0.000323324	C6H8O4	-H(-)	100	1,5-Anhydro-4-deoxy-D-glycero-hex-3-en-2-ulose	1,5-Anhydro-4-deoxy-D-glycero-hex-3-en-2-ulose; Ascopyrone M	C19822
125	143.035	1	0.884296	83504.4	0.000323324	C6H8O4	-H(-)	100	1,5-Anhydro-4-deoxy-D-glycero-hex-1-en-3-ulose	1,5-Anhydro-4-deoxy-D-glycero-hex-1-en-3-ulose; 5-Hydroxy-2-(hydroxymethyl)-2H-pyran-4(3H)-one; Ascopyrone P	C19826
126	143.046	1	0.891578	12308.3	-8.59933e-05	C5H8N2O3	-H(-)	100	N-Nitrosoproline	1-Nitroso-L-proline; N-Nitrosoproline	C19485
127	143.071	1	0.831285	22333.5	5.90775e-05	C7H12O3	-H(-)	100	trans-4-Hydroxycyclohexanecarboxylate	trans-4-Hydroxycyclohexanecarboxylate	C04404
127	143.071	1	0.831285	22333.5	5.90775e-05	C7H12O3	-H(-)	100	7-Oxoheptanoic acid	7-Ketoheptanoic acid; 7-Oxoheptanoic acid	C16590
128	143.108	1	0.710806	36323	0.000199797	C8H16O2	-H(-)	100	Octanoic acid	Caprylic acid; Octanoic acid; Octylic acid	C06423
128	143.108	1	0.710806	36323	0.000199797	C8H16O2	-H(-)	100	Valproic acid	Valproic acid	C07185
129	144.045	1	0.791801	315454	0.000129607	C9H7NO	-H(-)	100	3-Methyleneoxindole	3-Methyleneoxindole	C02796
129	144.045	1	0.791801	315454	0.000129607	C9H7NO	-H(-)	100	Isocarbostyril	1(2H)-Isoquinolinone; Isocarbostyril; Isoquinolin-1(2H)-one	C06324
129	144.045	1	0.791801	315454	0.000129607	C9H7NO	-H(-)	100	Quinolin-2-ol	2-Hydroxyquinoline; 2-Quinolinol; 2-Quinolone; Quinolin-2-ol	C06338
129	144.045	1	0.791801	315454	0.000129607	C9H7NO	-H(-)	100	4-Hydroxyquinoline	4-Hydroxyquinoline; Quinolin-4-ol	C06343
129	144.045	1	0.791801	315454	0.000129607	C9H7NO	-H(-)	100	2(1H)-Quinolinone	2(1H)-Quinolinone; Quinolin-2(1H)-one	C06415
129	144.045	1	0.791801	315454	0.000129607	C9H7NO	-H(-)	100	Indole-3-carboxaldehyde	Indole-3-carbaldehyde; Indole-3-carboxaldehyde	C08493
129	144.045	1	0.791801	315454	0.000129607	C9H7NO	-H(-)	100	8-Hydroxyquinoline	8-Hydroxyquinoline; Oxyquinoline	C19434
130	144.066	1	0.865901	58788	0.000237623	C6H11NO3	-H(-)	100	4-Acetamidobutanoate	4-Acetamidobutanoate; N4-Acetylaminobutanoate	C02946
130	144.066	1	0.865901	58788	0.000237623	C6H11NO3	-H(-)	100	6-Amino-2-oxohexanoate	2-Oxo-6-aminocaproate; 6-Amino-2-oxohexanoate	C03239
130	144.066	1	0.865901	58788	0.000237623	C6H11NO3	-H(-)	100	(S)-5-Amino-3-oxohexanoic acid	(S)-5-Amino-3-oxohexanoate; (S)-5-Amino-3-oxohexanoic acid	C03656
[truncated: 2,746 more rows]

## Sheet: S2C Data robust changes
Annotations												Fall experiment MD-CL		Spring experiment MD-CL		Both experiments pooled MD-CL		Fall experiment MD-Hive		ANOVA results	Bartonella apis		Bifidobacterium asteroides		Reconstituted microbiota (CL)		Firm-4		Firm-5		Frischella perrara		Giliamella apicola		Hive		Snodgrassella alvi
[truncated: 373 more rows]

[truncated: 2 more sheets: S2D Data CL_MD__mdions_hive, S2E Data ion intensities]
