# Supplementary material for: Disentangling metabolic functions of bacteria in the honey bee gut
Source: PLoS Biol. 2017 Dec 12;15(12):e2003467. doi: 10.1371/journal.pbio.2003467 (PMC5726620; doi:10.1371/journal.pbio.2003467)
Supplement: S4 Data — (XLSX) [file pbio.2003467.s004.xlsx]

## Sheet: Contents
Contents
ion	description	nr	sheet name	deprotonated mass
#821	spectrum 20eV	1	1_#821	431.099
#821	spectrum 20eV selected	2	2_#821	431.099
#821	MetFrag PubChem results	3	3_#821	431.099
#821	MetFrag KEGG results	4	4_#821	431.099
#821	Fragments top candidate	5	5_#821	431.099
#821	Fragments vitexin annotation	6	6_#821	431.099
#821	#821 with afzelin MoNA	7	7_#821	431.099
Vitexin	spectrum 20eV	8	8_Vitexin	431.099
Vitexin	spectrum 20eV selected	9	9_Vitexin	431.099
Vitexin	MetFrag PubChem results	10	10_Vitexin	431.099
Vitexin	MetFrag KEGG results	11	11_Vitexin	431.099
Vitexin	Fragments top candidate	12	12_Vitexin	431.099
Vitexin	#821 with vitexin standard	13	13_Vitexin	431.099
#835	spectrum 40eV	14	14_#835	447.093
#835	spectrum 40eV selected	15	15_#835	447.093
#835	MetFrag PubChem results	16	16_#835	447.093
#835	MetFrag KEGG results	17	17_#835	447.093
#835	Fragments top candidate	18	18_#835	447.093
Quercitrin	spectrum 40eV	19	19_Quercitrin	447.093
Quercitrin	spectrum 40eV selected	20	20_Quercitrin	447.093
Quercitrin	MetFrag PubChem results	21	21_Quercitrin	447.093
Quercitrin	MetFrag KEGG results	22	22_Quercitrin	447.093
Quercitrin	Fragments top candidate	23	23_Quercitrin	447.093
Quercitrin	#835 with quercitrin standard	24	24_Quercitrin	447.093
#853	spectrum 40eV	25	25_#853	461.109
#853	spectrum 40eV selected	26	26_#853	461.109
#853	MetFrag PubChem results	27	27_#853	461.109
#853	MetFrag KEGG results	28	28_#853	461.109
#853	Fragments top candidate	29	29_#853	461.109
#853	Fragments isocoparine annotation	30	30_#853	461.109
#981	spectrum 40eV	31	31_#981	593.151
#981	spectrum 40eV selected	32	32_#981	593.151
#981	MetFrag PubChem results	33	33_#981	593.151
#981	MetFrag KEGG results	34	34_#981	593.151
#981	Fragments first candidate	35	35_#981	593.151
#981	Fragments second candidate	36	36_#981	593.151
#981	#981 with scolymoside MoNA	37	37_#981	593.151
#995	spectrum 40eV	38	38_#995	609.146
#995	spectrum 40eV selected	39	39_#995	609.146
#995	MetFrag PubChem results	40	40_#995	609.146
#995	MetFrag KEGG results	41	41_#995	609.146
#995	Fragments first candidate	42	42_#995	609.146
#995	Fragments second candidate	43	43_#995	609.146
#995	#995 with multinoside A MoNA	44	44_#995	609.146
Rutin	spectrum 40eV	45	45_Rutin	609.146
Rutin	spectrum 40eV selected	46	46_Rutin	609.146
Rutin	MetFrag PubChem results	47	47_Rutin	609.146
Rutin	MetFrag KEGG results	48	48_Rutin	609.146
Rutin	Fragments top candidate	49	49_Rutin	609.146
Rutin	#995 with rutin standard	50	50_Rutin	609.146

## Sheet: 1_#821
Abund	m/z	Abund %
2581.32	285.04	100
1709.04	431.097	66.21
1395.42	284.032	54.06
714.45	431.3	27.68
575.93	431.208	22.31
487.82	59.0128	18.9
483.69	125.024	18.74
458.57	101.024	17.76
438.43	191.02	16.98
411.78	431.264	15.95
370.41	430.22	14.35
293.56	429.213	11.37
293.25	205.073	11.36
281.81	411.202	10.92
256.23	100.967	9.93
256.13	431.178	9.92
247.16	96.9687	9.58
234.14	89.0232	9.07
233.2	431.33	9.03
221.93	103.038	8.6
217	430.29	8.41
210.73	163.06	8.16
209	391.193	8.1
183.55	167.021	7.11
182.57	429.279	7.07
174.49	430.168	6.76
173.26	429.191	6.71
171.01	131.044	6.62
164.9	78.9576	6.39
164.89	430.258	6.39
161.91	284.046	6.27
160.44	431.061	6.22
156.2	195.052	6.05
150.28	167.045	5.82
147.73	143.037	5.72
136.83	85.0292	5.3
130.67	81.0343	5.06
130.48	227.052	5.05
130.16	73.0288	5.04
128.8	431.226	4.99
124.32	430.152	4.82
123.79	145.051	4.8
123.61	197.033	4.79
123.16	146.061	4.77
120.12	410.19	4.65
119.88	431.027	4.64
119.08	209.068	4.61
118.76	57.0346	4.6
116.86	129.055	4.53
115.83	430.973	4.49
115.44	129.02	4.47
108.73	336.023	4.21
107.7	430.244	4.17
107.32	185.063	4.16
105.08	371.189	4.07
105.14	411.072	4.07
103.84	190.994	4.02
103.16	131.033	4
103.17	151.002	4
101.64	371.063	3.94
100.48	290.187	3.89
100.16	285.011	3.88
98.14	411.018	3.8
96.27	283.993	3.73
95.48	141.018	3.7
94.48	210.018	3.66
93.12	178.059	3.61
92.08	132.031	3.57
92	145.098	3.56
91.56	286.044	3.55
90.64	154.059	3.51
90.62	201.111	3.51
90.05	71.0133	3.49
90.21	121.028	3.49
90.07	429.334	3.49
89.68	95.0056	3.47
89.03	429.317	3.45
88.89	332.113	3.44
87.11	111.008	3.37
86.01	347.993	3.33
85.76	97.0125	3.32
85.8	255.066	3.32
85.37	430.325	3.31
84.56	148.043	3.28
83	210.829	3.22
82.1	140.01	3.18
81.79	237.07	3.17
80.96	163.074	3.14
80.64	390.175	3.12
80.38	124.04	3.11
80.24	410.172	3.11
79.84	432.213	3.09
79.34	218.992	3.07
79	199.069	3.06
77.29	182.119	2.99
77.05	325.237	2.99
77.21	431.134	2.99
77.01	195.085	2.98
76.61	133.051	2.97
76.48	129.043	2.96

## Sheet: 2_#821
285.04	2581.32
431.097	1709.04
284.032	1395.42
59.0128	487.82
125.024	483.69
101.024	458.57
191.02	438.43
431.264	411.78
430.22	370.41
429.213	293.56
205.073	293.25
411.202	281.81
100.967	256.23
431.178	256.13
96.9687	247.16
89.0232	234.14

## Sheet: 3_#821
MetFrag	Score	InChI	MonoisotopicMass	CompoundName	Identifier	MolecularFormula	FormulasOfExplPeaks	SpectralSimilarity	ExplPeaks	NumberPeaksUsed	NoExplPeaks
226.0074554493441	1.8902	InChI=1S/C21H20O10/c1-8-15(25)17(27)18(28)21(29-8)31-20-16(26)14-12(24)6-11(23)7-13(14)30-19(20)9-2-4-10(22)5-3-9/h2-8,15,17-18,21-25,27-28H,1H3/t8-,15-,17+,18-,21+/m1/s1	432.106	5,7-dihydroxy-2-(4-hydroxyphenyl)-3-[(2S,3R,4S,5S,6R)-3,4,5-trihydroxy-6-methyl-tetrahydropyran-2-yl]oxy-chromen-4-one	90353299	C21H20O10	59.0128:[C2H4O2]-H-;89.0232:[C3H6O3]-H-;101.0236:[C4H7O3-H]-H-;125.0244:[C6H4O3+H]-;205.073:[C8H11O6+2H]-;284.0316:[C15H9O6]-H-;285.0404:[C15H9O6]-	14.433977673888213	59.0128_188.8;89.0232_90.6;101.0236_177.5;125.0244_187.2;205.073_113.5;284.0316_540.0;285.0404_999.0	11	7
226.0074554493441	1.8902	InChI=1S/C21H20O10/c1-8-15(25)17(27)18(28)21(29-8)31-20-16(26)14-12(24)6-9(22)7-13(14)30-19(20)10-4-2-3-5-11(10)23/h2-8,15,17-18,21-25,27-28H,1H3/t8-,15-,17+,18+,21+/m1/s1	432.106	5,7-dihydroxy-2-(2-hydroxyphenyl)-3-[(2S,3S,4S,5S,6R)-3,4,5-trihydroxy-6-methyl-tetrahydropyran-2-yl]oxy-chromen-4-one	71746834	C21H20O10	59.0128:[C2H4O2]-H-;89.0232:[C3H6O3]-H-;101.0236:[C4H7O3-H]-H-;125.0244:[C6H4O3+H]-;205.073:[C8H11O6+2H]-;284.0316:[C15H9O6]-H-;285.0404:[C15H9O6]-	14.433977673888213	59.0128_188.8;89.0232_90.6;101.0236_177.5;125.0244_187.2;205.073_113.5;284.0316_540.0;285.0404_999.0	11	7
225.76249375198898	1.8891	InChI=1S/C21H20O10/c1-8-18(26)19(27)20(28)21(29-8)31-15-4-9(2-3-11(15)23)14-7-13(25)17-12(24)5-10(22)6-16(17)30-14/h2-8,18-24,26-28H,1H3/t8-,18-,19+,20-,21?/m1/s1	432.106	5,7-dihydroxy-2-[4-hydroxy-3-[(3R,4S,5S,6R)-3,4,5-trihydroxy-6-methyl-tetrahydropyran-2-yl]oxy-phenyl]chromen-4-one	69337611	C21H20O10	59.0128:[C2H4O2]-H-;89.0232:[C3H6O3]-H-;101.0236:[C4H7O3-H]-H-;125.0244:[C6H4O3+H]-;205.073:[C8H12O6+H]-;284.0316:[C15H9O6]-H-;285.0404:[C15H9O6]-	14.433977673888213	59.0128_188.8;89.0232_90.6;101.0236_177.5;125.0244_187.2;205.073_113.5;284.0316_540.0;285.0404_999.0	11	7
225.76249375198898	1.8891	InChI=1S/C21H20O10/c1-8-18(26)19(27)20(28)21(29-8)31-14-3-2-9(4-11(14)23)15-7-13(25)17-12(24)5-10(22)6-16(17)30-15/h2-8,18-24,26-28H,1H3/t8-,18-,19+,20-,21+/m1/s1	432.106	5,7-dihydroxy-2-[3-hydroxy-4-[(2S,3R,4S,5S,6R)-3,4,5-trihydroxy-6-methyl-tetrahydropyran-2-yl]oxy-phenyl]chromen-4-one	91136014	C21H20O10	59.0128:[C2H4O2]-H-;89.0232:[C3H6O3]-H-;101.0236:[C4H7O3-H]-H-;125.0244:[C6H4O3+H]-;205.073:[C8H12O6+H]-;284.0316:[C15H9O6]-H-;285.0404:[C15H9O6]-	14.433977673888213	59.0128_188.8;89.0232_90.6;101.0236_177.5;125.0244_187.2;205.073_113.5;284.0316_540.0;285.0404_999.0	11	7
224.4921947447101	1.8835	InChI=1S/C21H20O10/c1-8-16(24)19(27)20(28)21(29-8)31-14-7-13-15(18(26)17(14)25)11(23)6-12(30-13)9-2-4-10(22)5-3-9/h2-8,16,19-22,24-28H,1H3/t8-,16-,19-,20-,21-/m0/s1	432.106	5,6-dihydroxy-2-(4-hydroxyphenyl)-7-[(2S,3S,4S,5R,6S)-3,4,5-trihydroxy-6-methyl-tetrahydropyran-2-yl]oxy-chromen-4-one	69753795	C21H20O10	59.0128:[C2H4O2]-H-;89.0232:[C3H6O3]-H-;101.0236:[C4H7O3-H]-H-;125.0244:[C6H3O3+2H]-;205.073:[C8H12O6+H]-;284.0316:[C15H9O6]-H-;285.0404:[C15H9O6]-	14.433977673888213	59.0128_188.8;89.0232_90.6;101.0236_177.5;125.0244_187.2;205.073_113.5;284.0316_540.0;285.0404_999.0	11	7
224.4921947447101	1.8835	InChI=1S/C21H20O10/c1-8-16(25)18(27)19(28)21(29-8)31-20-12(24)7-14-15(17(20)26)11(23)6-13(30-14)9-2-4-10(22)5-3-9/h2-8,16,18-19,21-22,24-28H,1H3/t8-,16+,18+,19-,21+/m0/s1	432.106	5,7-dihydroxy-2-(4-hydroxyphenyl)-6-[(2R,3S,4R,5S,6S)-3,4,5-trihydroxy-6-methyl-tetrahydropyran-2-yl]oxy-chromen-4-one	45485394	C21H20O10	59.0128:[C2H4O2]-H-;89.0232:[C3H6O3]-H-;101.0236:[C4H7O3-H]-H-;125.0244:[C6H3O3+2H]-;205.073:[C8H12O6+H]-;284.0316:[C15H9O6]-H-;285.0404:[C15H9O6]-	14.433977673888213	59.0128_188.8;89.0232_90.6;101.0236_177.5;125.0244_187.2;205.073_113.5;284.0316_540.0;285.0404_999.0	11	7
224.4921947447101	1.8835	InChI=1S/C21H20O10/c1-8-16(26)17(27)18(28)21(29-8)31-19-13(25)6-11(23)15-12(24)7-14(30-20(15)19)9-2-4-10(22)5-3-9/h2-8,16-18,21-23,25-28H,1H3/t8-,16-,17+,18+,21+/m1/s1	432.106	5,7-dihydroxy-2-(4-hydroxyphenyl)-8-[(2S,3S,4S,5S,6R)-3,4,5-trihydroxy-6-methyl-tetrahydropyran-2-yl]oxy-chromen-4-one	90697325	C21H20O10	59.0128:[C2H4O2]-H-;89.0232:[C3H6O3]-H-;101.0236:[C4H7O3-H]-H-;125.0244:[C6H3O3+2H]-;205.073:[C8H12O6+H]-;284.0316:[C15H9O6]-H-;285.0404:[C15H9O6]-	14.433977673888213	59.0128_188.8;89.0232_90.6;101.0236_177.5;125.0244_187.2;205.073_113.5;284.0316_540.0;285.0404_999.0	11	7
223.57031594116268	1.8794	InChI=1S/C21H20O10/c1-8-15(25)17(27)18(28)21(29-8)31-20-16(26)11-4-3-10(22)7-14(11)30-19(20)9-2-5-12(23)13(24)6-9/h2-8,15,17-18,21-25,27-28H,1H3/t8-,15-,17+,18+,21?/m0/s1	432.106	2-(3,4-dihydroxyphenyl)-7-hydroxy-3-[(3R,4R,5R,6S)-3,4,5-trihydroxy-6-methyl-tetrahydropyran-2-yl]oxy-chromen-4-one	10296447	C21H20O10	59.0128:[C2H4O2]-H-;89.0232:[C3H6O3]-H-;101.0236:[C4H7O3-H]-H-;125.0244:[C6H3O3+2H]-;205.073:[C8H11O6+2H]-;284.0316:[C15H9O6]-H-;285.0404:[C15H9O6]-	14.433977673888213	59.0128_188.8;89.0232_90.6;101.0236_177.5;125.0244_187.2;205.073_113.5;284.0316_540.0;285.0404_999.0	11	7
219.2320600956871	1.8602	InChI=1S/C21H20O10/c1-8-17(25)19(27)20(28)21(29-8)30-10-2-3-11-12(22)7-15(31-16(11)6-10)9-4-13(23)18(26)14(24)5-9/h2-8,17,19-21,23-28H,1H3/t8?,17-,19-,20?,21-/m0/s1	432.106	7-[(2S,4S,5R)-3,4,5-trihydroxy-6-methyl-tetrahydropyran-2-yl]oxy-2-(3,4,5-trihydroxyphenyl)chromen-4-one	44257578	C21H20O10	59.0128:[C2H4O2]-H-;89.0232:[C3H6O3]-H-;101.0236:[C4H7O3-H]-H-;125.0244:[C6H5O3]-;284.0316:[C15H9O6]-H-;285.0404:[C15H9O6]-	14.433977673888213	59.0128_188.8;89.0232_90.6;101.0236_177.5;125.0244_187.2;284.0316_540.0;285.0404_999.0	11	6
217.9856346871422	1.8601	InChI=1S/C21H20O10/c22-7-17-20(29)14(28)6-16(30-17)19-12(26)4-11(25)18-13(27)5-15(31-21(18)19)8-1-2-9(23)10(24)3-8/h1-5,14,16-17,20,22-26,28-29H,6-7H2	432.106	8-[4,5-dihydroxy-6-(hydroxymethyl)tetrahydropyran-2-yl]-2-(3,4-dihydroxyphenyl)-5,7-dihydroxy-chromen-4-one	20980946	C21H20O10	59.0128:[C2H4O2]-H-;89.0232:[C3H6O3]-H-;101.0236:[C4H7O3-H]-H-;125.0244:[C6H3O3+2H]-;284.0316:[C15H9O6]-H-;285.0404:[C15H9O6]-	14.521425030175084	59.0128_188.8;89.0232_90.6;101.0236_177.5;125.0244_187.2;284.0316_540.0;285.0404_999.0	11	6
225.76249375198898	1.8481	InChI=1S/C21H20O10/c1-8-17(25)19(27)20(28)21(30-8)31-14-4-9(2-3-12(14)23)11-7-29-15-6-10(22)5-13(24)16(15)18(11)26/h2-8,17,19-25,27-28H,1H3/t8-,17-,19+,20+,21-/m0/s1	432.106	5,7-dihydroxy-3-[4-hydroxy-3-[(2S,3R,4R,5R,6S)-3,4,5-trihydroxy-6-methyl-tetrahydropyran-2-yl]oxy-phenyl]chromen-4-one	11604429	C21H20O10	59.0128:[C2H4O2]-H-;89.0232:[C3H6O3]-H-;101.0236:[C4H7O3-H]-H-;125.0244:[C6H4O3+H]-;205.073:[C8H12O6+H]-;284.0316:[C15H9O6]-H-;285.0404:[C15H9O6]-	13.770289248436354	59.0128_188.8;89.0232_90.6;101.0236_177.5;125.0244_187.2;205.073_113.5;284.0316_540.0;285.0404_999.0	11	7
225.76249375198898	1.8481	InChI=1S/C21H20O10/c1-8-17(25)19(27)20(28)21(30-8)31-14-3-2-9(4-12(14)23)11-7-29-15-6-10(22)5-13(24)16(15)18(11)26/h2-8,17,19-25,27-28H,1H3/t8-,17-,19+,20-,21+/m1/s1	432.106	5,7-dihydroxy-3-[3-hydroxy-4-[(2S,3R,4S,5S,6R)-3,4,5-trihydroxy-6-methyl-tetrahydropyran-2-yl]oxy-phenyl]chromen-4-one	77461162	C21H20O10	59.0128:[C2H4O2]-H-;89.0232:[C3H6O3]-H-;101.0236:[C4H7O3-H]-H-;125.0244:[C6H4O3+H]-;205.073:[C8H12O6+H]-;284.0316:[C15H9O6]-H-;285.0404:[C15H9O6]-	13.770289248436354	59.0128_188.8;89.0232_90.6;101.0236_177.5;125.0244_187.2;205.073_113.5;284.0316_540.0;285.0404_999.0	11	7
215.99938100599942	1.8459	InChI=1S/C21H20O10/c1-8-15(24)17(26)19(28)21(29-8)30-11-4-2-9(3-5-11)20-18(27)16(25)14-12(23)6-10(22)7-13(14)31-20/h2-8,15,17,19,21-24,26-28H,1H3/t8-,15-,17+,19+,21-/m0/s1	432.106	3,5,7-trihydroxy-2-[4-[(2S,3R,4R,5R,6S)-3,4,5-trihydroxy-6-methyl-tetrahydropyran-2-yl]oxyphenyl]chromen-4-one	102519401	C21H20O10	59.0128:[C2H4O2]-H-;89.0232:[C3H6O3]-H-;101.0236:[C4H7O3-H]-H-;125.0244:[C6H4O3+H]-;284.0316:[C15H9O6]-H-;285.0404:[C15H9O6]-	14.433977673888213	59.0128_188.8;89.0232_90.6;101.0236_177.5;125.0244_187.2;284.0316_540.0;285.0404_999.0	11	6
214.72908199872055	1.8403	InChI=1S/C21H20O10/c1-8-15(24)17(26)19(28)21(29-8)30-11-6-12(23)14-13(7-11)31-20(18(27)16(14)25)9-2-4-10(22)5-3-9/h2-8,15,17,19,21-24,26-28H,1H3/t8-,15-,17+,19+,21?/m1/s1	432.106	3,5-dihydroxy-2-(4-hydroxyphenyl)-7-[(3S,4S,5S,6R)-3,4,5-trihydroxy-6-methyl-tetrahydropyran-2-yl]oxy-chromen-4-one	53891100	C21H20O10	59.0128:[C2H4O2]-H-;89.0232:[C3H6O3]-H-;101.0236:[C4H7O3-H]-H-;125.0244:[C6H3O3+2H]-;284.0316:[C15H9O6]-H-;285.0404:[C15H9O6]-	14.433977673888213	59.0128_188.8;89.0232_90.6;101.0236_177.5;125.0244_187.2;284.0316_540.0;285.0404_999.0	11	6
214.72908199872055	1.8403	InChI=1S/C21H20O10/c1-8-18(26)19(27)20(28)21(29-8)30-10-5-13(24)17-14(25)7-15(31-16(17)6-10)9-2-3-11(22)12(23)4-9/h2-8,18-24,26-28H,1H3/t8-,18-,19+,20-,21?/m1/s1	432.106	2-(3,4-dihydroxyphenyl)-5-hydroxy-7-[(3R,4S,5S,6R)-3,4,5-trihydroxy-6-methyl-tetrahydropyran-2-yl]oxy-chromen-4-one	69337967	C21H20O10	59.0128:[C2H4O2]-H-;89.0232:[C3H6O3]-H-;101.0236:[C4H7O3-H]-H-;125.0244:[C6H3O3+2H]-;284.0316:[C15H9O6]-H-;285.0404:[C15H9O6]-	14.433977673888213	59.0128_188.8;89.0232_90.6;101.0236_177.5;125.0244_187.2;284.0316_540.0;285.0404_999.0	11	6
214.72908199872055	1.8403	InChI=1S/C21H20O10/c1-8-15(24)17(26)19(28)21(29-8)31-13-7-11(23)6-12-14(13)16(25)18(27)20(30-12)9-2-4-10(22)5-3-9/h2-8,15,17,19,21-24,26-28H,1H3/t8?,15-,17-,19?,21-/m0/s1	432.106	3,7-dihydroxy-2-(4-hydroxyphenyl)-5-[(2S,4S,5R)-3,4,5-trihydroxy-6-methyl-tetrahydropyran-2-yl]oxy-chromen-4-one	44258917	C21H20O10	59.0128:[C2H4O2]-H-;89.0232:[C3H6O3]-H-;101.0236:[C4H7O3-H]-H-;125.0244:[C6H3O3+2H]-;284.0316:[C15H9O6]-H-;285.0404:[C15H9O6]-	14.433977673888213	59.0128_188.8;89.0232_90.6;101.0236_177.5;125.0244_187.2;284.0316_540.0;285.0404_999.0	11	6
213.7621193024968	1.836	InChI=1S/C21H20O10/c1-8-15(24)17(26)19(28)21(29-8)30-10-3-4-11-14(7-10)31-20(18(27)16(11)25)9-2-5-12(22)13(23)6-9/h2-8,15,17,19,21-24,26-28H,1H3	432.106	2-(3,4-dihydroxyphenyl)-3-hydroxy-7-(3,4,5-trihydroxy-6-methyl-tetrahydropyran-2-yl)oxy-chromen-4-one	24772515	C21H20O10	59.0128:[C2H4O2]-H-;89.0232:[C3H6O3]-H-;101.0236:[C4H7O3-H]-H-;125.0244:[C6H6O3]-H-;284.0316:[C15H9O6]-H-;285.0404:[C15H9O6]-	14.433977673888213	59.0128_188.8;89.0232_90.6;101.0236_177.5;125.0244_187.2;284.0316_540.0;285.0404_999.0	11	6
215.5453860334779	1.8223	InChI=1S/C21H20O10/c1-8-4-14(26)17(27)21(29-8)31-20-18(28)16-13(25)6-10(22)7-15(16)30-19(20)9-2-3-11(23)12(24)5-9/h2-3,5-8,14,17,21-27H,4H2,1H3	432.106	3-(3,4-dihydroxy-6-methyl-tetrahydropyran-2-yl)oxy-2-(3,4-dihydroxyphenyl)-5,7-dihydroxy-chromen-4-one	123924627	C21H20O10	59.0128:[C2H4O2]-H-;89.0232:[C3H5O3]-;101.0236:[C4H7O3-H]-H-;125.0244:[C6H4O3+H]-;284.0316:[C15H9O6]-H-;285.0404:[C15H9O6]-	14.083759679688981	59.0128_188.8;89.0232_90.6;101.0236_177.5;125.0244_187.2;284.0316_540.0;285.0404_999.0	11	6
217.98746128569786	1.8126	InChI=1S/C21H20O10/c1-7-17(27)18(28)19(29)21(30-7)16-12(25)5-11(24)15-13(26)6-14(31-20(15)16)8-2-3-9(22)10(23)4-8/h2-7,17-19,21-25,27-29H,1H3/t7-,17+,18+,19-,21+/m1/s1	432.106	2-(3,4-dihydroxyphenyl)-5,7-dihydroxy-8-[(2S,3R,4S,5R,6R)-3,4,5-trihydroxy-6-methyl-tetrahydropyran-2-yl]chromen-4-one	72376245	C21H20O10	59.0128:[C2H4O2]-H-;89.0232:[C3H6O3]-H-;101.0236:[C4H7O3-H]-H-;125.0244:[C6H3O3+2H]-;284.0316:[C15H9O6]-H-;285.0404:[C15H9O6]-	13.752331891295734	59.0128_188.8;89.0232_90.6;101.0236_177.5;125.0244_187.2;284.0316_540.0;285.0404_999.0	11	6
217.98746128569786	1.8126	InChI=1S/C21H20O10/c1-7-17(26)19(28)20(29)21(30-7)16-12(25)6-14-15(18(16)27)11(24)5-13(31-14)8-2-3-9(22)10(23)4-8/h2-7,17,19-23,25-29H,1H3/t7-,17-,19+,20-,21+/m1/s1	432.106	2-(3,4-dihydroxyphenyl)-5,7-dihydroxy-6-[(2S,3R,4S,5S,6R)-3,4,5-trihydroxy-6-methyl-tetrahydropyran-2-yl]chromen-4-one	102119756	C21H20O10	59.0128:[C2H4O2]-H-;89.0232:[C3H6O3]-H-;101.0236:[C4H7O3-H]-H-;125.0244:[C6H3O3+2H]-;284.0316:[C15H9O6]-H-;285.0404:[C15H9O6]-	13.752331891295734	59.0128_188.8;89.0232_90.6;101.0236_177.5;125.0244_187.2;284.0316_540.0;285.0404_999.0	11	6
214.72908199872055	1.7993	InChI=1S/C21H20O10/c1-8-17(25)19(27)20(28)21(30-8)31-15-6-10(22)5-14-16(15)18(26)11(7-29-14)9-2-3-12(23)13(24)4-9/h2-8,17,19-25,27-28H,1H3/t8-,17-,19+,20+,21-/m0/s1	432.106	3-(3,4-dihydroxyphenyl)-7-hydroxy-5-[(2S,3R,4R,5R,6S)-3,4,5-trihydroxy-6-methyl-tetrahydropyran-2-yl]oxy-chromen-4-one	102400091	C21H20O10	59.0128:[C2H4O2]-H-;89.0232:[C3H6O3]-H-;101.0236:[C4H7O3-H]-H-;125.0244:[C6H3O3+2H]-;284.0316:[C15H9O6]-H-;285.0404:[C15H9O6]-	13.770289248436354	59.0128_188.8;89.0232_90.6;101.0236_177.5;125.0244_187.2;284.0316_540.0;285.0404_999.0	11	6
219.23364041413356	1.7771	InChI=1S/C21H20O10/c1-7-16(26)18(28)19(29)21(30-7)15-17(27)14-12(25)5-9(22)6-13(14)31-20(15)8-2-3-10(23)11(24)4-8/h2-7,16,18-19,21-26,28-29H,1H3/t7-,16-,18+,19+,21-/m0/s1	432.106	2-(3,4-dihydroxyphenyl)-5,7-dihydroxy-3-[(2S,3R,4R,5R,6S)-3,4,5-trihydroxy-6-methyl-tetrahydropyran-2-yl]chromen-4-one	101585376	C21H20O10	59.0128:[C2H4O2]-H-;89.0232:[C3H6O3]-H-;101.0236:[C4H7O3-H]-H-;125.0244:[C6H4O3+H]-;284.0316:[C15H9O6]-H-;285.0404:[C15H9O6]-	13.087058382525168	59.0128_188.8;89.0232_90.6;101.0236_177.5;125.0244_187.2;284.0316_540.0;285.0404_999.0	11	6
215.24010689135963	1.77	InChI=1S/C21H20O10/c1-8(22)19-17(27)18(28)21(31-19)29-11-6-12(24)14-13(7-11)30-20(16(26)15(14)25)9-2-4-10(23)5-3-9/h2-8,17-19,21-24,26-28H,1H3/t8-,17-,18+,19-,21?/m0/s1	432.106	7-[(3R,4S,5S)-3,4-dihydroxy-5-[(1S)-1-hydroxyethyl]tetrahydrofuran-2-yl]oxy-3,5-dihydroxy-2-(4-hydroxyphenyl)chromen-4-one	20833198	C21H20O10	59.0128:[C2H4O2]-H-;89.0232:[C3H5O3]-;101.0236:[C4H6O3]-H-;125.0244:[C6H3O3+2H]-;284.0316:[C15H9O6]-H-;285.0404:[C15H9O6]-	13.257588406273666	59.0128_188.8;89.0232_90.6;101.0236_177.5;125.0244_187.2;284.0316_540.0;285.0404_999.0	11	6
214.72908199872055	1.7548	InChI=1S/C21H20O10/c1-8-15(24)17(26)19(28)21(29-8)30-11-6-12(23)14-13(7-11)31-20(18(27)16(14)25)9-2-4-10(22)5-3-9/h2-8,15,17,19-24,26,28H,1H3/t8-,15-,17+,19+,20?,21-/m0/s1	432.106	5-hydroxy-2-(4-hydroxyphenyl)-7-[(2S,3R,4R,5R,6S)-3,4,5-trihydroxy-6-methyl-tetrahydropyran-2-yl]oxy-chromane-3,4-dione	10410527	C21H20O10	59.0128:[C2H4O2]-H-;89.0232:[C3H6O3]-H-;101.0236:[C4H7O3-H]-H-;125.0244:[C6H3O3+2H]-;284.0316:[C15H9O6]-H-;285.0404:[C15H9O6]-	13.048649374697716	59.0128_188.8;89.0232_90.6;101.0236_177.5;125.0244_187.2;284.0316_540.0;285.0404_999.0	11	6
214.72908199872055	1.7222	InChI=1S/C21H20O10/c1-8-17(25)19(27)20(28)21(29-8)30-10-6-13(24)16-14(7-10)31-15(18(16)26)5-9-2-3-11(22)12(23)4-9/h2-8,17,19-25,27-28H,1H3/b15-5+/t8?,17-,19-,20?,21-/m0/s1	432.106	(2E)-2-[(3,4-dihydroxyphenyl)methylene]-4-hydroxy-6-[(2S,4S,5R)-3,4,5-trihydroxy-6-methyl-tetrahydropyran-2-yl]oxy-benzofuran-3-one	73950868	C21H20O10	59.0128:[C2H4O2]-H-;89.0232:[C3H6O3]-H-;101.0236:[C4H7O3-H]-H-;125.0244:[C6H3O3+2H]-;284.0316:[C15H9O6]-H-;285.0404:[C15H9O6]-	12.519265279073359	59.0128_188.8;89.0232_90.6;101.0236_177.5;125.0244_187.2;284.0316_540.0;285.0404_999.0	11	6
154.67733990453408	1.6557	InChI=1S/C21H20O10/c1-8-2-4-9(5-3-8)18-16(27)15(26)13-10(22)6-11(23)19(20(13)30-18)31-21-17(28)14(25)12(24)7-29-21/h2-6,12,14,17,21-25,27-28H,7H2,1H3	432.106	3,5,7-trihydroxy-2-(p-tolyl)-8-(3,4,5-trihydroxytetrahydropyran-2-yl)oxy-chromen-4-one	118048100	C21H20O10	59.0128:[C2H4O2]-H-;89.0232:[C3H6O3]-H-;101.0236:[C4H7O3-H]-H-;125.0244:[C6H3O3+2H]-;284.0316:[C15H8O6]-;285.0404:[C15H8O6+H]-	15.749310710548908	59.0128_188.8;89.0232_90.6;101.0236_177.5;125.0244_187.2;284.0316_540.0;285.0404_999.0	11	6
155.19859145947657	1.6466	InChI=1S/C21H20O10/c22-8-15-17(27)18(28)20-21(30-15)29-14-6-3-10(16(26)19(14)31-20)11(23)4-1-9-2-5-12(24)13(25)7-9/h1-7,15,17-18,20-22,24-28H,8H2	432.106	3-(3,4-dihydroxyphenyl)-1-[3,4,6-trihydroxy-2-(hydroxymethyl)-3,4,4a,10a-tetrahydro-2H-pyrano[3,2-b][1,4]benzodioxin-7-yl]prop-2-en-1-one	72327090	C21H20O10	59.0128:[C2H4O2]-H-;89.0232:[C3H6O3]-H-;101.0236:[C4H7O3-H]-H-;125.0244:[C6H3O3+2H]-;284.0316:[C15H10O6-H]-H-;285.0404:[C15H10O6]-H-	15.564560342188779	59.0128_188.8;89.0232_90.6;101.0236_177.5;125.0244_187.2;284.0316_540.0;285.0404_999.0	11	6
154.9141671912265	1.6229	InChI=1S/C21H20O10/c1-28-11-4-2-9(3-5-11)19-20(31-21-18(27)16(25)13(24)8-29-21)17(26)15-12(23)6-10(22)7-14(15)30-19/h2-7,13,16,18,21-25,27H,8H2,1H3/t13-,16?,18?,21-/m0/s1	432.106	5,7-dihydroxy-2-(4-methoxyphenyl)-3-[(2S,5S)-3,4,5-trihydroxytetrahydropyran-2-yl]oxy-chromen-4-one	44259087	C21H20O10	59.0128:[C2H4O2]-H-;89.0232:[C3H6O3]-H-;101.0236:[C4H7O3-H]-H-;125.0244:[C6H4O3+H]-;284.0316:[C15H8O6]-;285.0404:[C15H8O6+H]-	15.200894608509588	59.0128_188.8;89.0232_90.6;101.0236_177.5;125.0244_187.2;284.0316_540.0;285.0404_999.0	11	6
153.64386818394763	1.6173	InChI=1S/C21H20O10/c1-28-16-4-9(2-3-11(16)22)15-7-13(24)18-12(23)5-10(6-17(18)31-15)30-21-20(27)19(26)14(25)8-29-21/h2-7,14,19-23,25-27H,8H2,1H3/t14-,19+,20?,21+/m1/s1	432.106	5-hydroxy-2-(4-hydroxy-3-methoxy-phenyl)-7-[(2S,4S,5R)-3,4,5-trihydroxytetrahydropyran-2-yl]oxy-chromen-4-one	44258184	C21H20O10	59.0128:[C2H4O2]-H-;89.0232:[C3H6O3]-H-;101.0236:[C4H7O3-H]-H-;125.0244:[C6H3O3+2H]-;284.0316:[C15H8O6]-;285.0404:[C15H8O6+H]-	15.200894608509588	59.0128_188.8;89.0232_90.6;101.0236_177.5;125.0244_187.2;284.0316_540.0;285.0404_999.0	11	6
153.64386818394763	1.6173	InChI=1S/C21H20O10/c1-28-14-3-2-9(4-11(14)23)15-7-12(24)18-16(30-15)5-10(22)6-17(18)31-21-20(27)19(26)13(25)8-29-21/h2-7,13,19-23,25-27H,8H2,1H3/t13-,19+,20-,21+/m1/s1	432.106	7-hydroxy-2-(3-hydroxy-4-methoxy-phenyl)-5-[(2S,3R,4S,5R)-3,4,5-trihydroxytetrahydropyran-2-yl]oxy-chromen-4-one	122403103	C21H20O10	59.0128:[C2H4O2]-H-;89.0232:[C3H6O3]-H-;101.0236:[C4H7O3-H]-H-;125.0244:[C6H3O3+2H]-;284.0316:[C15H8O6]-;285.0404:[C15H8O6+H]-	15.200894608509588	59.0128_188.8;89.0232_90.6;101.0236_177.5;125.0244_187.2;284.0316_540.0;285.0404_999.0	11	6
154.57811473404658	1.5883	InChI=1S/C21H20O10/c1-28-14-3-2-9(4-11(14)23)15-7-13(25)18-12(24)5-10(6-16(18)30-15)29-21-20(27)19(26)17(8-22)31-21/h2-7,17,19-24,26-27H,8H2,1H3/t17-,19+,20-,21-/m1/s1	432.106	7-[(2S,3R,4R,5R)-3,4-dihydroxy-5-(hydroxymethyl)tetrahydrofuran-2-yl]oxy-5-hydroxy-2-(3-hydroxy-4-methoxy-phenyl)chromen-4-one	10252220	C21H20O10	59.0128:[C2H4O2]-H-;89.0232:[C3H6O3]-H-;101.0236:[C4H6O3]-H-;125.0244:[C6H3O3+2H]-;284.0316:[C15H8O6]-;285.0404:[C15H8O6+H]-	14.663255620047229	59.0128_188.8;89.0232_90.6;101.0236_177.5;125.0244_187.2;284.0316_540.0;285.0404_999.0	11	6
162.59111942646206	1.5798	InChI=1S/C21H20O10/c22-6-18-21(28)14(26)8-30-16-5-17-19(20(27)10(16)7-29-18)13(25)4-15(31-17)9-1-2-11(23)12(24)3-9/h1-5,14,18,21-24,26-28H,6-8H2	432.106	NA	123500109	C21H20O10	59.0128:[C2H4O2]-H-;89.0232:[C3H6O3]-H-;101.0236:[C4H7O3-H]-H-;125.0244:[C6H7O3-H]-H-;205.073:[C8H13O6]-;284.0316:[C15H8O6]-;285.0404:[C15H8O6+H]-	13.95148492422293	59.0128_188.8;89.0232_90.6;101.0236_177.5;125.0244_187.2;205.073_113.5;284.0316_540.0;285.0404_999.0	11	7
122.34754226898369	1.5401	InChI=1S/C21H20O10/c22-8-16-18(26)19(27)20(28)21(31-16)29-11-3-1-9(2-4-11)14-7-13(25)17-12(24)5-10(23)6-15(17)30-14/h1-7,16,18-24,26-28H,8H2/t16-,18-,19+,20-,21-/m0/s1	432.106	5,7-dihydroxy-2-[4-[(2R,3S,4R,5R,6S)-3,4,5-trihydroxy-6-(hydroxymethyl)tetrahydropyran-2-yl]oxyphenyl]chromen-4-one	101135001	C21H20O10	59.0128:[C2H4O2]-H-;89.0232:[C3H6O3]-H-;101.0236:[C4H7O3-H]-H-;125.0244:[C6H4O3+H]-;205.073:[C8H12O6+H]-;284.0316:[C15H9O6]-H-;285.0404:[C15H9O6]-	16.19449544421671	59.0128_188.8;89.0232_90.6;101.0236_177.5;125.0244_187.2;205.073_113.5;284.0316_540.0;285.0404_999.0	11	7
122.34754226898369	1.5401	InChI=1S/C21H20O10/c22-8-16-18(26)19(27)20(28)21(31-16)30-13-4-2-1-3-10(13)14-7-12(25)17-11(24)5-9(23)6-15(17)29-14/h1-7,16,18-24,26-28H,8H2/t16-,18-,19+,20-,21-/m1/s1	432.106	5,7-dihydroxy-2-[2-[(2S,3R,4S,5S,6R)-3,4,5-trihydroxy-6-(hydroxymethyl)tetrahydropyran-2-yl]oxyphenyl]chromen-4-one	10670361	C21H20O10	59.0128:[C2H4O2]-H-;89.0232:[C3H6O3]-H-;101.0236:[C4H7O3-H]-H-;125.0244:[C6H4O3+H]-;205.073:[C8H12O6+H]-;284.0316:[C15H9O6]-H-;285.0404:[C15H9O6]-	16.19449544421671	59.0128_188.8;89.0232_90.6;101.0236_177.5;125.0244_187.2;205.073_113.5;284.0316_540.0;285.0404_999.0	11	7
121.07724326170481	1.5345	InChI=1S/C21H20O10/c22-8-16-18(26)19(27)20(28)21(31-16)29-9-5-12(24)17-13(25)7-14(30-15(17)6-9)10-3-1-2-4-11(10)23/h1-7,16,18-24,26-28H,8H2/t16?,18-,19+,20?,21-/m1/s1	432.106	5-hydroxy-2-(2-hydroxyphenyl)-7-[(2S,4S,5S)-3,4,5-trihydroxy-6-(hydroxymethyl)tetrahydropyran-2-yl]oxy-chromen-4-one	44257609	C21H20O10	59.0128:[C2H4O2]-H-;89.0232:[C3H6O3]-H-;101.0236:[C4H7O3-H]-H-;125.0244:[C6H3O3+2H]-;205.073:[C8H12O6+H]-;284.0316:[C15H9O6]-H-;285.0404:[C15H9O6]-	16.19449544421671	59.0128_188.8;89.0232_90.6;101.0236_177.5;125.0244_187.2;205.073_113.5;284.0316_540.0;285.0404_999.0	11	7
121.07724326170481	1.5345	InChI=1S/C21H20O10/c22-8-16-17(26)18(27)19(28)21(31-16)29-11-5-12-13(24)7-15(30-20(12)14(25)6-11)9-1-3-10(23)4-2-9/h1-7,16-19,21-23,25-28H,8H2/t16-,17-,18+,19-,21-/m1/s1	432.106	8-hydroxy-2-(4-hydroxyphenyl)-6-[(2S,3R,4S,5S,6R)-3,4,5-trihydroxy-6-(hydroxymethyl)tetrahydropyran-2-yl]oxy-chromen-4-one	46237234	C21H20O10	59.0128:[C2H4O2]-H-;89.0232:[C3H6O3]-H-;101.0236:[C4H7O3-H]-H-;125.0244:[C6H3O3+2H]-;205.073:[C8H12O6+H]-;284.0316:[C15H9O6]-H-;285.0404:[C15H9O6]-	16.19449544421671	59.0128_188.8;89.0232_90.6;101.0236_177.5;125.0244_187.2;205.073_113.5;284.0316_540.0;285.0404_999.0	11	7
121.07724326170481	1.5345	InChI=1S/C21H20O10/c22-8-14-17(26)18(27)19(28)21(31-14)30-13-7-11(24)16(25)20-15(13)10(23)6-12(29-20)9-4-2-1-3-5-9/h1-7,14,17-19,21-22,24-28H,8H2/t14?,17-,18+,19?,21-/m1/s1	432.106	7,8-dihydroxy-2-phenyl-5-[(2S,4S,5S)-3,4,5-trihydroxy-6-(hydroxymethyl)tetrahydropyran-2-yl]oxy-chromen-4-one	44258558	C21H20O10	59.0128:[C2H4O2]-H-;89.0232:[C3H6O3]-H-;101.0236:[C4H7O3-H]-H-;125.0244:[C6H3O3+2H]-;205.073:[C8H12O6+H]-;284.0316:[C15H9O6]-H-;285.0404:[C15H9O6]-	16.19449544421671	59.0128_188.8;89.0232_90.6;101.0236_177.5;125.0244_187.2;205.073_113.5;284.0316_540.0;285.0404_999.0	11	7
121.07724326170481	1.5345	InChI=1S/C21H20O10/c22-8-16-18(26)19(27)20(28)21(31-16)29-11-5-12(24)17-13(25)7-14(30-15(17)6-11)9-2-1-3-10(23)4-9/h1-7,16,18-24,26-28H,8H2/t16-,18-,19+,20-,21-/m1/s1	432.106	5-hydroxy-2-(3-hydroxyphenyl)-7-[(2S,3R,4S,5S,6R)-3,4,5-trihydroxy-6-(hydroxymethyl)tetrahydropyran-2-yl]oxy-chromen-4-one	102257014	C21H20O10	59.0128:[C2H4O2]-H-;89.0232:[C3H6O3]-H-;101.0236:[C4H7O3-H]-H-;125.0244:[C6H3O3+2H]-;205.073:[C8H12O6+H]-;284.0316:[C15H9O6]-H-;285.0404:[C15H9O6]-	16.19449544421671	59.0128_188.8;89.0232_90.6;101.0236_177.5;125.0244_187.2;205.073_113.5;284.0316_540.0;285.0404_999.0	11	7
121.07724326170481	1.5345	InChI=1S/C21H20O10/c22-8-14-16(25)18(27)19(28)21(31-14)30-13-7-11(24)15-10(23)6-12(29-20(15)17(13)26)9-4-2-1-3-5-9/h1-7,14,16,18-19,21-22,24-28H,8H2/t14?,16-,18-,19?,21+/m0/s1	432.106	5,8-dihydroxy-2-phenyl-7-[(2S,4S,5R)-3,4,5-trihydroxy-6-(hydroxymethyl)tetrahydropyran-2-yl]oxy-chromen-4-one	44258560	C21H20O10	59.0128:[C2H4O2]-H-;89.0232:[C3H6O3]-H-;101.0236:[C4H7O3-H]-H-;125.0244:[C6H3O3+2H]-;205.073:[C8H12O6+H]-;284.0316:[C15H9O6]-H-;285.0404:[C15H9O6]-	16.19449544421671	59.0128_188.8;89.0232_90.6;101.0236_177.5;125.0244_187.2;205.073_113.5;284.0316_540.0;285.0404_999.0	11	7
121.07724326170481	1.5345	InChI=1S/C21H20O10/c22-8-16-18(26)19(27)20(28)21(31-16)29-11-5-12(24)17-13(25)7-14(30-15(17)6-11)9-1-3-10(23)4-2-9/h1-7,16,18-24,26-28H,8H2/t16-,18-,19+,20-,21-/m0/s1	432.106	5-hydroxy-2-(4-hydroxyphenyl)-7-[(2R,3S,4R,5R,6S)-3,4,5-trihydroxy-6-(hydroxymethyl)tetrahydropyran-2-yl]oxy-chromen-4-one	101339211	C21H20O10	59.0128:[C2H4O2]-H-;89.0232:[C3H6O3]-H-;101.0236:[C4H7O3-H]-H-;125.0244:[C6H3O3+2H]-;205.073:[C8H12O6+H]-;284.0316:[C15H9O6]-H-;285.0404:[C15H9O6]-	16.19449544421671	59.0128_188.8;89.0232_90.6;101.0236_177.5;125.0244_187.2;205.073_113.5;284.0316_540.0;285.0404_999.0	11	7
121.07724326170481	1.5345	InChI=1S/C21H20O10/c22-8-14-17(25)19(27)20(28)21(31-14)30-13-7-12-15(18(26)16(13)24)10(23)6-11(29-12)9-4-2-1-3-5-9/h1-7,14,17,19-22,24-28H,8H2/t14-,17+,19-,20+,21-/m0/s1	432.106	5,6-dihydroxy-2-phenyl-7-[(2R,3R,4S,5S,6S)-3,4,5-trihydroxy-6-(hydroxymethyl)tetrahydropyran-2-yl]oxy-chromen-4-one	73506008	C21H20O10	59.0128:[C2H4O2]-H-;89.0232:[C3H6O3]-H-;101.0236:[C4H7O3-H]-H-;125.0244:[C6H3O3+2H]-;205.073:[C8H12O6+H]-;284.0316:[C15H9O6]-H-;285.0404:[C15H9O6]-	16.19449544421671	59.0128_188.8;89.0232_90.6;101.0236_177.5;125.0244_187.2;205.073_113.5;284.0316_540.0;285.0404_999.0	11	7
121.07724326170481	1.5345	InChI=1S/C21H20O10/c22-8-16-18(26)19(27)20(28)21(31-16)30-15-6-11(24)5-14-17(15)12(25)7-13(29-14)9-1-3-10(23)4-2-9/h1-7,16,18-24,26-28H,8H2/t16?,18-,19-,20?,21+/m0/s1	432.106	7-hydroxy-2-(4-hydroxyphenyl)-5-[(2S,4S,5R)-3,4,5-trihydroxy-6-(hydroxymethyl)tetrahydropyran-2-yl]oxy-chromen-4-one	44257796	C21H20O10	59.0128:[C2H4O2]-H-;89.0232:[C3H6O3]-H-;101.0236:[C4H7O3-H]-H-;125.0244:[C6H3O3+2H]-;205.073:[C8H12O6+H]-;284.0316:[C15H9O6]-H-;285.0404:[C15H9O6]-	16.19449544421671	59.0128_188.8;89.0232_90.6;101.0236_177.5;125.0244_187.2;205.073_113.5;284.0316_540.0;285.0404_999.0	11	7
120.11028056548108	1.5302	InChI=1S/C21H20O10/c22-8-17-18(26)19(27)20(28)21(31-17)29-10-2-3-11-13(24)7-15(30-16(11)6-10)9-1-4-12(23)14(25)5-9/h1-7,17-23,25-28H,8H2/t17-,18-,19+,20-,21+/m1/s1	432.106	2-(3,4-dihydroxyphenyl)-7-[(2R,3R,4S,5S,6R)-3,4,5-trihydroxy-6-(hydroxymethyl)tetrahydropyran-2-yl]oxy-chromen-4-one	91540128	C21H20O10	59.0128:[C2H4O2]-H-;89.0232:[C3H6O3]-H-;101.0236:[C4H7O3-H]-H-;125.0244:[C6H6O3]-H-;205.073:[C8H12O6+H]-;284.0316:[C15H9O6]-H-;285.0404:[C15H9O6]-	16.19449544421671	59.0128_188.8;89.0232_90.6;101.0236_177.5;125.0244_187.2;205.073_113.5;284.0316_540.0;285.0404_999.0	11	7
119.80046368828434	1.5288	InChI=1S/C21H20O10/c22-8-14-16(25)18(27)19(28)21(30-14)31-20-11(24)7-13-15(17(20)26)10(23)6-12(29-13)9-4-2-1-3-5-9/h1-7,14,16,18-19,21-22,24-28H,8H2/t14-,16-,18+,19-,21-/m1/s1	432.106	5,7-dihydroxy-2-phenyl-6-[(2R,3R,4S,5S,6R)-3,4,5-trihydroxy-6-(hydroxymethyl)tetrahydropyran-2-yl]oxy-chromen-4-one	78323070	C21H20O10	59.0128:[C2H4O2]-H-;89.0232:[C3H6O3]-H-;101.0236:[C4H7O3-H]-H-;125.0244:[C6H3O3+2H]-;205.073:[C8H11O6+2H]-;284.0316:[C15H9O6]-H-;285.0404:[C15H9O6]-	16.19449544421671	59.0128_188.8;89.0232_90.6;101.0236_177.5;125.0244_187.2;205.073_113.5;284.0316_540.0;285.0404_999.0	11	7
116.05633616748761	1.5122	InChI=1S/C21H20O10/c22-8-13-15(25)17(27)18(28)21(30-13)31-20-16(26)14-11(24)6-10(23)7-12(14)29-19(20)9-4-2-1-3-5-9/h1-7,13,15,17-18,21-25,27-28H,8H2/t13?,15-,17?,18?,21+/m1/s1	432.106	5,7-dihydroxy-2-phenyl-3-[(2S,5S)-3,4,5-trihydroxy-6-(hydroxymethyl)tetrahydropyran-2-yl]oxy-chromen-4-one	44258719	C21H20O10	59.0128:[C2H4O2]-H-;89.0232:[C3H6O3]-H-;101.0236:[C4H7O3-H]-H-;125.0244:[C6H4O3+H]-;205.073:[C8H11O6+2H]-;284.0316:[C15H9O6]-H-;285.0404:[C15H9O6]-	16.19449544421671	59.0128_188.8;89.0232_90.6;101.0236_177.5;125.0244_187.2;205.073_113.5;284.0316_540.0;285.0404_999.0	11	7
116.05633616748761	1.5122	InChI=1S/C21H20O10/c22-8-12-15(25)17(27)18(28)21(30-12)31-20-16(26)13-11(7-6-10(23)14(13)24)29-19(20)9-4-2-1-3-5-9/h1-7,12,15,17-18,21-25,27-28H,8H2/t12-,15+,17+,18-,21-/m1/s1	432.106	5,6-dihydroxy-2-phenyl-3-[(2R,3R,4S,5R,6R)-3,4,5-trihydroxy-6-(hydroxymethyl)tetrahydropyran-2-yl]oxy-chromen-4-one	101243894	C21H20O10	59.0128:[C2H4O2]-H-;89.0232:[C3H6O3]-H-;101.0236:[C4H7O3-H]-H-;125.0244:[C6H4O3+H]-;205.073:[C8H11O6+2H]-;284.0316:[C15H9O6]-H-;285.0404:[C15H9O6]-	16.19449544421671	59.0128_188.8;89.0232_90.6;101.0236_177.5;125.0244_187.2;205.073_113.5;284.0316_540.0;285.0404_999.0	11	7
114.54107546285363	1.5055	InChI=1S/C21H20O10/c22-8-13-15(24)17(26)19(28)21(31-13)29-10-6-11(23)14-12(7-10)30-20(18(27)16(14)25)9-4-2-1-3-5-9/h1-7,13,15,17,19,21-24,26-28H,8H2/t13?,15-,17+,19?,21-/m1/s1	432.106	3,5-dihydroxy-2-phenyl-7-[(2S,4S,5S)-3,4,5-trihydroxy-6-(hydroxymethyl)tetrahydropyran-2-yl]oxy-chromen-4-one	44258724	C21H20O10	59.0128:[C2H4O2]-H-;89.0232:[C3H6O3]-H-;101.0236:[C4H7O3-H]-H-;125.0244:[C6H3O3+2H]-;205.073:[C8H12O6+H]-;284.0316:[C15H9O6]-H-;285.0404:[C15H9O6]-	16.19449544421671	59.0128_188.8;89.0232_90.6;101.0236_177.5;125.0244_187.2;205.073_113.5;284.0316_540.0;285.0404_999.0	11	7
113.66539379381015	1.5029	InChI=1S/C21H20O10/c22-10-3-1-9(2-4-10)14-7-13(24)17-12(23)5-11(6-15(17)30-14)29-8-16-18(25)19(26)20(27)21(28)31-16/h1-7,16,18-23,25-28H,8H2/t16-,18-,19+,20-,21-/m0/s1	432.106	5-hydroxy-2-(4-hydroxyphenyl)-7-[[(2S,3R,4R,5S,6S)-3,4,5,6-tetrahydroxytetrahydropyran-2-yl]methoxy]chromen-4-one	44302347	C21H20O10	59.0128:[C2H4O2]-H-;89.0232:[C3H6O3]-H-;101.0236:[C4H7O3-H]-H-;125.0244:[C6H3O3+2H]-;205.073:[C8H12O6+H]-;284.0316:[C15H10O6-H]-H-;285.0404:[C15H10O6]-H-	16.2149662774172	59.0128_188.8;89.0232_90.6;101.0236_177.5;125.0244_187.2;205.073_113.5;284.0316_540.0;285.0404_999.0	11	7
113.6191966593062	1.5015	InChI=1S/C21H20O10/c22-8-13-15(25)17(27)18(28)21(30-13)31-20-16(26)14-11(24)2-1-3-12(14)29-19(20)9-4-6-10(23)7-5-9/h1-7,13,15,17-18,21-25,27-28H,8H2/t13-,15-,17+,18-,21+/m1/s1	432.106	5-hydroxy-2-(4-hydroxyphenyl)-3-[(2S,3R,4S,5S,6R)-3,4,5-trihydroxy-6-(hydroxymethyl)tetrahydropyran-2-yl]oxy-chromen-4-one	5481218	C21H20O10	59.0128:[C2H4O2]-H-;89.0232:[C3H6O3]-H-;101.0236:[C4H7O3-H]-H-;125.0244:[C6H3O3+2H]-;205.073:[C8H11O6+2H]-;284.0316:[C15H9O6]-H-;285.0404:[C15H9O6]-	16.19449544421671	59.0128_188.8;89.0232_90.6;101.0236_177.5;125.0244_187.2;205.073_113.5;284.0316_540.0;285.0404_999.0	11	7
113.6191966593062	1.5015	InChI=1S/C21H20O10/c22-8-14-16(26)17(27)18(28)21(30-14)31-20-15(25)12-6-5-11(24)7-13(12)29-19(20)9-1-3-10(23)4-2-9/h1-7,14,16-18,21-24,26-28H,8H2/t14-,16-,17+,18-,21+/m1/s1	432.106	7-hydroxy-2-(4-hydroxyphenyl)-3-[(2S,3R,4S,5S,6R)-3,4,5-trihydroxy-6-(hydroxymethyl)tetrahydropyran-2-yl]oxy-chromen-4-one	56840252	C21H20O10	59.0128:[C2H4O2]-H-;89.0232:[C3H6O3]-H-;101.0236:[C4H7O3-H]-H-;125.0244:[C6H3O3+2H]-;205.073:[C8H11O6+2H]-;284.0316:[C15H9O6]-H-;285.0404:[C15H9O6]-	16.19449544421671	59.0128_188.8;89.0232_90.6;101.0236_177.5;125.0244_187.2;205.073_113.5;284.0316_540.0;285.0404_999.0	11	7
113.5741127666299	1.5013	InChI=1S/C21H20O10/c22-8-14-16(25)17(26)19(28)21(31-14)29-11-4-1-9(2-5-11)20-18(27)15(24)12-6-3-10(23)7-13(12)30-20/h1-7,14,16-17,19,21-23,25-28H,8H2/t14?,16-,17?,19?,21-/m1/s1	432.106	3,7-dihydroxy-2-[4-[(2S,5S)-3,4,5-trihydroxy-6-(hydroxymethyl)tetrahydropyran-2-yl]oxyphenyl]chromen-4-one	44258676	C21H20O10	59.0128:[C2H4O2]-H-;89.0232:[C3H6O3]-H-;101.0236:[C4H7O3-H]-H-;125.0244:[C6H6O3]-H-;205.073:[C8H12O6+H]-;284.0316:[C15H9O6]-H-;285.0404:[C15H9O6]-	16.19449544421671	59.0128_188.8;89.0232_90.6;101.0236_177.5;125.0244_187.2;205.073_113.5;284.0316_540.0;285.0404_999.0	11	7
113.5741127666299	1.5013	InChI=1S/C21H20O10/c22-8-14-16(25)17(26)19(28)21(31-14)29-11-5-6-12-13(7-11)30-20(18(27)15(12)24)9-1-3-10(23)4-2-9/h1-7,14,16-17,19,21-23,25-28H,8H2/t14?,16-,17+,19?,21-/m1/s1	432.106	3-hydroxy-2-(4-hydroxyphenyl)-7-[(2S,4S,5S)-3,4,5-trihydroxy-6-(hydroxymethyl)tetrahydropyran-2-yl]oxy-chromen-4-one	44258675	C21H20O10	59.0128:[C2H4O2]-H-;89.0232:[C3H6O3]-H-;101.0236:[C4H7O3-H]-H-;125.0244:[C6H6O3]-H-;205.073:[C8H12O6+H]-;284.0316:[C15H9O6]-H-;285.0404:[C15H9O6]-	16.19449544421671	59.0128_188.8;89.0232_90.6;101.0236_177.5;125.0244_187.2;205.073_113.5;284.0316_540.0;285.0404_999.0	11	7
113.4748061378341	1.5008	InChI=1S/C21H20O10/c22-8-14-16(26)17(27)18(28)21(30-14)31-20-15(25)10-3-1-2-4-13(10)29-19(20)9-5-6-11(23)12(24)7-9/h1-7,14,16-18,21-24,26-28H,8H2/t14-,16-,17-,18+,21-/m0/s1	432.106	2-(3,4-dihydroxyphenyl)-3-[(2S,3R,4S,5R,6S)-3,4,5-trihydroxy-6-(hydroxymethyl)tetrahydropyran-2-yl]oxy-chromen-4-one	10342749	C21H20O10	59.0128:[C2H4O2]-H-;89.0232:[C3H6O3]-H-;101.0236:[C4H7O3-H]-H-;125.0244:[C6H4O3+H]-;205.073:[C8H11O6+2H]-;284.0316:[C15H9O6]-H-;285.0404:[C15H9O6]-	16.19449544421671	59.0128_188.8;89.0232_90.6;101.0236_177.5;125.0244_187.2;205.073_113.5;284.0316_540.0;285.0404_999.0	11	7
121.1194657831761	1.4982	InChI=1S/C21H20O10/c22-7-14-17(26)19(28)20(29)21(31-14)16-11(25)6-13-15(18(16)27)10(24)5-12(30-13)8-2-1-3-9(23)4-8/h1-6,14,17,19-23,25-29H,7H2	432.106	5,7-dihydroxy-2-(3-hydroxyphenyl)-6-[3,4,5-trihydroxy-6-(hydroxymethyl)tetrahydropyran-2-yl]chromen-4-one	77410205	C21H20O10	59.0128:[C2H4O2]-H-;89.0232:[C3H6O3]-H-;101.0236:[C4H7O3-H]-H-;125.0244:[C6H3O3+2H]-;205.073:[C8H12O6+H]-;284.0316:[C15H9O6]-H-;285.0404:[C15H9O6]-	15.603779824011587	59.0128_188.8;89.0232_90.6;101.0236_177.5;125.0244_187.2;205.073_113.5;284.0316_540.0;285.0404_999.0	11	7
121.1194657831761	1.4982	InChI=1S/C21H20O10/c22-7-14-17(27)18(28)19(29)21(31-14)16-11(25)5-10(24)15-12(26)6-13(30-20(15)16)8-2-1-3-9(23)4-8/h1-6,14,17-19,21-25,27-29H,7H2	432.106	5,7-dihydroxy-2-(3-hydroxyphenyl)-8-[3,4,5-trihydroxy-6-(hydroxymethyl)tetrahydropyran-2-yl]chromen-4-one	77410200	C21H20O10	59.0128:[C2H4O2]-H-;89.0232:[C3H6O3]-H-;101.0236:[C4H7O3-H]-H-;125.0244:[C6H3O3+2H]-;205.073:[C8H12O6+H]-;284.0316:[C15H9O6]-H-;285.0404:[C15H9O6]-	15.603779824011587	59.0128_188.8;89.0232_90.6;101.0236_177.5;125.0244_187.2;205.073_113.5;284.0316_540.0;285.0404_999.0	11	7
112.59912446879062	1.4982	InChI=1S/C21H20O10/c22-11-6-5-9(7-12(11)23)19-20(15(24)10-3-1-2-4-13(10)30-19)29-8-14-16(25)17(26)18(27)21(28)31-14/h1-7,14,16-18,21-23,25-28H,8H2/t14-,16-,17+,18-,21+/m1/s1	432.106	2-(3,4-dihydroxyphenyl)-3-[[(2R,3S,4S,5R,6S)-3,4,5,6-tetrahydroxytetrahydropyran-2-yl]methoxy]chromen-4-one	46905162	C21H20O10	59.0128:[C2H4O2]-H-;89.0232:[C3H6O3]-H-;101.0236:[C4H7O3-H]-H-;125.0244:[C6H4O3+H]-;205.073:[C8H11O6+2H]-;284.0316:[C15H10O6-H]-H-;285.0404:[C15H10O6]-H-	16.2149662774172	59.0128_188.8;89.0232_90.6;101.0236_177.5;125.0244_187.2;205.073_113.5;284.0316_540.0;285.0404_999.0	11	7
121.1194657831761	1.4982	InChI=1S/C21H20O10/c22-7-14-17(26)19(28)20(29)21(31-14)10-5-13-15(18(27)16(10)25)11(24)6-12(30-13)8-1-3-9(23)4-2-8/h1-6,14,17,19-23,25-29H,7H2/t14-,17-,19+,20-,21+/m1/s1	432.106	5,6-dihydroxy-2-(4-hydroxyphenyl)-7-[(2S,3R,4R,5S,6R)-3,4,5-trihydroxy-6-(hydroxymethyl)tetrahydropyran-2-yl]chromen-4-one	101922572	C21H20O10	59.0128:[C2H4O2]-H-;89.0232:[C3H6O3]-H-;101.0236:[C4H7O3-H]-H-;125.0244:[C6H3O3+2H]-;205.073:[C8H12O6+H]-;284.0316:[C15H9O6]-H-;285.0404:[C15H9O6]-	15.603779824011587	59.0128_188.8;89.0232_90.6;101.0236_177.5;125.0244_187.2;205.073_113.5;284.0316_540.0;285.0404_999.0	11	7
121.1194657831761	1.4982	InChI=1S/C21H20O10/c22-7-14-17(26)19(28)20(29)21(31-14)16-11(25)6-13-15(18(16)27)10(24)5-12(30-13)8-1-3-9(23)4-2-8/h1-6,14,17,19-23,25-29H,7H2/t14-,17-,19-,20+,21-/m1/s1	432.106	5,7-dihydroxy-2-(4-hydroxyphenyl)-6-[(2R,3S,4S,5S,6R)-3,4,5-trihydroxy-6-(hydroxymethyl)tetrahydropyran-2-yl]chromen-4-one	99720544	C21H20O10	59.0128:[C2H4O2]-H-;89.0232:[C3H6O3]-H-;101.0236:[C4H7O3-H]-H-;125.0244:[C6H3O3+2H]-;205.073:[C8H12O6+H]-;284.0316:[C15H9O6]-H-;285.0404:[C15H9O6]-	15.603779824011587	59.0128_188.8;89.0232_90.6;101.0236_177.5;125.0244_187.2;205.073_113.5;284.0316_540.0;285.0404_999.0	11	7
121.1194657831761	1.4982	InChI=1S/C21H20O10/c22-7-14-17(27)18(28)19(29)21(31-14)16-11(25)5-10(24)15-12(26)6-13(30-20(15)16)8-1-3-9(23)4-2-8/h1-6,14,17-19,21-25,27-29H,7H2/t14-,17+,18+,19+,21?/m1/s1	432.106	5,7-dihydroxy-2-(4-hydroxyphenyl)-8-[(3S,4R,5R,6R)-3,4,5-trihydroxy-6-(hydroxymethyl)tetrahydropyran-2-yl]chromen-4-one	58076568	C21H20O10	59.0128:[C2H4O2]-H-;89.0232:[C3H6O3]-H-;101.0236:[C4H7O3-H]-H-;125.0244:[C6H3O3+2H]-;205.073:[C8H12O6+H]-;284.0316:[C15H9O6]-H-;285.0404:[C15H9O6]-	15.603779824011587	59.0128_188.8;89.0232_90.6;101.0236_177.5;125.0244_187.2;205.073_113.5;284.0316_540.0;285.0404_999.0	11	7
134.65085657279442	1.498	InChI=1S/C21H20O10/c1-7-5-9-13(17(26)12-8(15(9)24)3-2-4-10(12)23)18(27)14(7)21(30)20(29)19(28)16(25)11(6-22)31-21/h2-5,11,16,19-20,22-23,25,27-30H,6H2,1H3/t11-,16-,19+,20-,21-/m1/s1	432.106	1,8-dihydroxy-3-methyl-2-[(2R,3R,4S,5S,6R)-2,3,4,5-tetrahydroxy-6-(hydroxymethyl)tetrahydropyran-2-yl]anthracene-9,10-dione	69625845	C21H20O10	59.0128:[C2H4O2]-H-;89.0232:[C3H6O3]-H-;101.0236:[C4H7O3-H]-H-;125.0244:[C6H6O3]-H-;205.073:[C8H11O6+2H]-;284.0316:[C15H7O6+H]-;285.0404:[C15H7O6+2H]-	14.629132421470997	59.0128_188.8;89.0232_90.6;101.0236_177.5;125.0244_187.2;205.073_113.5;284.0316_540.0;285.0404_999.0	11	7
120.02482843368557	1.4934	InChI=1S/C21H20O10/c22-7-15-17(27)18(28)19(29)21(31-15)16-11(24)4-2-9-12(25)6-14(30-20(9)16)8-1-3-10(23)13(26)5-8/h1-6,15,17-19,21-24,26-29H,7H2/t15-,17-,18+,19-,21+/m1/s1	432.106	2-(3,4-dihydroxyphenyl)-7-hydroxy-8-[(2S,3R,4R,5S,6R)-3,4,5-trihydroxy-6-(hydroxymethyl)tetrahydropyran-2-yl]chromen-4-one	53326068	C21H20O10	59.0128:[C2H4O2]-H-;89.0232:[C3H6O3]-H-;101.0236:[C4H7O3-H]-H-;125.0244:[C6H4O3+H]-;205.073:[C8H12O6+H]-;284.0316:[C15H9O6]-H-;285.0404:[C15H9O6]-	15.603779824011587	59.0128_188.8;89.0232_90.6;101.0236_177.5;125.0244_187.2;205.073_113.5;284.0316_540.0;285.0404_999.0	11	7
125.66844911717683	1.4916	InChI=1S/C21H20O10/c22-14-10-6-7-11(9-4-2-1-3-5-9)29-12(10)8-13(15(14)23)30-21-18(26)16(24)17(25)19(31-21)20(27)28/h1-5,7-8,16-19,21-26H,6H2,(H,27,28)	432.106	6-[(5,6-dihydroxy-2-phenyl-4H-chromen-7-yl)oxy]-3,4,5-trihydroxy-tetrahydropyran-2-carboxylic acid	58660911	C21H20O10	59.0128:[C2H4O2]-H-;89.0232:[C3H6O3]-H-;101.0236:[C4H5O3]-;125.0244:[C6H3O3+2H]-;191.0196:[C6H9O7-H]-H-;284.0316:[C15H11O6-2H]-H-;285.0404:[C15H11O6-H]-H-	15.17050877043957	59.0128_188.8;89.0232_90.6;101.0236_177.5;125.0244_187.2;191.0196_169.7;284.0316_540.0;285.0404_999.0	11	7
122.32761302779994	1.4872	InChI=1S/C21H20O10/c22-8-12-18(26)19(27)20(28)31-21(12)29-10-3-1-9(2-4-10)16-6-13(23)11-5-14(24)15(25)7-17(11)30-16/h1-7,12,18-22,24-28H,8H2	432.106	6,7-dihydroxy-2-[4-[4,5,6-trihydroxy-3-(hydroxymethyl)tetrahydropyran-2-yl]oxyphenyl]chromen-4-one	16657779	C21H20O10	59.0128:[C2H4O2]-H-;89.0232:[C3H6O3]-H-;101.0236:[C4H7O3-H]-H-;125.0244:[C6H4O3+H]-;205.073:[C8H12O6+H]-;284.0316:[C15H9O6]-H-;285.0404:[C15H9O6]-	15.33853443382541	59.0128_188.8;89.0232_90.6;101.0236_177.5;125.0244_187.2;205.073_113.5;284.0316_540.0;285.0404_999.0	11	7
115.8113744701325	1.475	InChI=1S/C21H20O10/c22-7-15-18(26)19(27)20(28)21(31-15)30-11-3-1-9(2-4-11)12-8-29-14-6-10(23)5-13(24)16(14)17(12)25/h1-6,8,15,18-24,26-28H,7H2/t15-,18-,19-,20+,21+/m1/s1	432.106	5,7-dihydroxy-3-[4-[(2R,3S,4R,5S,6R)-3,4,5-trihydroxy-6-(hydroxymethyl)tetrahydropyran-2-yl]oxyphenyl]chromen-4-one	100731754	C21H20O10	59.0128:[C2H4O2]-H-;89.0232:[C3H6O3]-H-;101.0236:[C4H7O3-H]-H-;125.0244:[C6H4O3+H]-;205.073:[C8H12O6+H]-;284.0316:[C15H9O6]-H-;285.0404:[C15H9O6]-	15.607963828671746	59.0128_188.8;89.0232_90.6;101.0236_177.5;125.0244_187.2;205.073_113.5;284.0316_540.0;285.0404_999.0	11	7
115.8113744701325	1.475	InChI=1S/C21H20O10/c22-7-16-18(26)19(27)20(28)21(31-16)30-10-3-1-9(2-4-10)12-8-29-15-6-14(24)13(23)5-11(15)17(12)25/h1-6,8,16,18-24,26-28H,7H2/t16-,18-,19+,20-,21-/m1/s1	432.106	6,7-dihydroxy-3-[4-[(2S,3R,4S,5S,6R)-3,4,5-trihydroxy-6-(hydroxymethyl)tetrahydropyran-2-yl]oxyphenyl]chromen-4-one	121596018	C21H20O10	59.0128:[C2H4O2]-H-;89.0232:[C3H6O3]-H-;101.0236:[C4H7O3-H]-H-;125.0244:[C6H4O3+H]-;205.073:[C8H12O6+H]-;284.0316:[C15H9O6]-H-;285.0404:[C15H9O6]-	15.607963828671746	59.0128_188.8;89.0232_90.6;101.0236_177.5;125.0244_187.2;205.073_113.5;284.0316_540.0;285.0404_999.0	11	7
137.66823289972083	1.4709	InChI=1S/C21H20O10/c1-7-12(30-21-20(29)19(28)18(27)13(6-22)31-21)5-11-14(15(7)24)17(26)9-3-2-8(23)4-10(9)16(11)25/h2-5,13,18-24,27-29H,6H2,1H3/t13-,18-,19+,20-,21-/m1/s1	432.106	1,6-dihydroxy-2-methyl-3-[(2S,3R,4S,5S,6R)-3,4,5-trihydroxy-6-(hydroxymethyl)tetrahydropyran-2-yl]oxy-anthracene-9,10-dione	14539976	C21H20O10	59.0128:[C2H4O2]-H-;89.0232:[C3H6O3]-H-;100.9666:[C6O2-2H]-H-;101.0236:[C4H7O3-H]-H-;125.0244:[C6H6O3]-H-;205.073:[C8H12O6+H]-;284.0316:[C15H7O6+H]-;285.0404:[C15H7O6+2H]-	13.97291048073702	59.0128_188.8;89.0232_90.6;100.9666_99.2;101.0236_177.5;125.0244_187.2;205.073_113.5;284.0316_540.0;285.0404_999.0	11	8
114.54107546285363	1.4694	InChI=1S/C21H20O10/c22-7-14-16(25)18(27)19(28)21(31-14)30-13-6-5-11-15(24)12(8-29-20(11)17(13)26)9-1-3-10(23)4-2-9/h1-6,8,14,16,18-19,21-23,25-28H,7H2	432.106	8-hydroxy-3-(4-hydroxyphenyl)-7-[3,4,5-trihydroxy-6-(hydroxymethyl)tetrahydropyran-2-yl]oxy-chromen-4-one	91223290	C21H20O10	59.0128:[C2H4O2]-H-;89.0232:[C3H6O3]-H-;101.0236:[C4H7O3-H]-H-;125.0244:[C6H3O3+2H]-;205.073:[C8H12O6+H]-;284.0316:[C15H9O6]-H-;285.0404:[C15H9O6]-	15.607963828671746	59.0128_188.8;89.0232_90.6;101.0236_177.5;125.0244_187.2;205.073_113.5;284.0316_540.0;285.0404_999.0	11	7
114.54107546285363	1.4694	InChI=1S/C21H20O10/c22-8-13-16(24)18(26)19(27)21(31-13)29-10-6-11(23)15-12(7-10)30-20(28)14(17(15)25)9-4-2-1-3-5-9/h1-7,13,16,18-19,21-27H,8H2/t13-,16-,18+,19-,21?/m1/s1	432.106	4,5-dihydroxy-3-phenyl-7-[(3R,4S,5S,6R)-3,4,5-trihydroxy-6-(hydroxymethyl)tetrahydropyran-2-yl]oxy-chromen-2-one	90827675	C21H20O10	59.0128:[C2H4O2]-H-;89.0232:[C3H6O3]-H-;101.0236:[C4H7O3-H]-H-;125.0244:[C6H3O3+2H]-;205.073:[C8H12O6+H]-;284.0316:[C15H9O6]-H-;285.0404:[C15H9O6]-	15.607963828671746	59.0128_188.8;89.0232_90.6;101.0236_177.5;125.0244_187.2;205.073_113.5;284.0316_540.0;285.0404_999.0	11	7
114.54107546285363	1.4694	InChI=1S/C21H20O10/c22-7-15-18(26)19(27)20(28)21(31-15)30-14-6-11(24)5-13-16(14)17(25)12(8-29-13)9-1-3-10(23)4-2-9/h1-6,8,15,18-24,26-28H,7H2/t15-,18+,19+,20-,21?/m1/s1	432.106	7-hydroxy-3-(4-hydroxyphenyl)-5-[(3R,4S,5R,6R)-3,4,5-trihydroxy-6-(hydroxymethyl)tetrahydropyran-2-yl]oxy-chromen-4-one	91600791	C21H20O10	59.0128:[C2H4O2]-H-;89.0232:[C3H6O3]-H-;101.0236:[C4H7O3-H]-H-;125.0244:[C6H3O3+2H]-;205.073:[C8H12O6+H]-;284.0316:[C15H9O6]-H-;285.0404:[C15H9O6]-	15.607963828671746	59.0128_188.8;89.0232_90.6;101.0236_177.5;125.0244_187.2;205.073_113.5;284.0316_540.0;285.0404_999.0	11	7
114.54107546285363	1.4694	InChI=1S/C21H20O10/c22-7-15-17(26)18(27)19(28)21(31-15)30-11-5-12-16(25)13(8-29-20(12)14(24)6-11)9-1-3-10(23)4-2-9/h1-6,8,15,17-19,21-24,26-28H,7H2	432.106	8-hydroxy-3-(4-hydroxyphenyl)-6-[3,4,5-trihydroxy-6-(hydroxymethyl)tetrahydropyran-2-yl]oxy-chromen-4-one	4579174	C21H20O10	59.0128:[C2H4O2]-H-;89.0232:[C3H6O3]-H-;101.0236:[C4H7O3-H]-H-;125.0244:[C6H3O3+2H]-;205.073:[C8H12O6+H]-;284.0316:[C15H9O6]-H-;285.0404:[C15H9O6]-	15.607963828671746	59.0128_188.8;89.0232_90.6;101.0236_177.5;125.0244_187.2;205.073_113.5;284.0316_540.0;285.0404_999.0	11	7
114.54107546285363	1.4694	InChI=1S/C21H20O10/c22-7-15-18(26)19(27)20(28)21(31-15)30-11-5-13(24)16-14(6-11)29-8-12(17(16)25)9-1-3-10(23)4-2-9/h1-6,8,15,18-24,26-28H,7H2/t15?,18-,19?,20+,21-/m1/s1	432.106	5-hydroxy-3-(4-hydroxyphenyl)-7-[(2S,3S,5S)-3,4,5-trihydroxy-6-(hydroxymethyl)tetrahydropyran-2-yl]oxy-chromen-4-one	122643322	C21H20O10	59.0128:[C2H4O2]-H-;89.0232:[C3H6O3]-H-;101.0236:[C4H7O3-H]-H-;125.0244:[C6H3O3+2H]-;205.073:[C8H12O6+H]-;284.0316:[C15H9O6]-H-;285.0404:[C15H9O6]-	15.607963828671746	59.0128_188.8;89.0232_90.6;101.0236_177.5;125.0244_187.2;205.073_113.5;284.0316_540.0;285.0404_999.0	11	7
114.54107546285363	1.4694	InChI=1S/C21H20O10/c22-7-16-18(26)19(27)20(28)21(31-16)30-15-6-14-11(5-13(15)24)17(25)12(8-29-14)9-1-3-10(23)4-2-9/h1-6,8,16,18-24,26-28H,7H2/t16-,18-,19+,20-,21-/m0/s1	432.106	6-hydroxy-3-(4-hydroxyphenyl)-7-[(2R,3S,4R,5R,6S)-3,4,5-trihydroxy-6-(hydroxymethyl)tetrahydropyran-2-yl]oxy-chromen-4-one	9932506	C21H20O10	59.0128:[C2H4O2]-H-;89.0232:[C3H6O3]-H-;101.0236:[C4H7O3-H]-H-;125.0244:[C6H3O3+2H]-;205.073:[C8H12O6+H]-;284.0316:[C15H9O6]-H-;285.0404:[C15H9O6]-	15.607963828671746	59.0128_188.8;89.0232_90.6;101.0236_177.5;125.0244_187.2;205.073_113.5;284.0316_540.0;285.0404_999.0	11	7
114.54107546285363	1.4694	InChI=1S/C21H20O10/c22-7-15-18(26)19(27)20(28)21(31-15)30-9-5-13(24)16-14(6-9)29-8-11(17(16)25)10-3-1-2-4-12(10)23/h1-6,8,15,18-24,26-28H,7H2/t15?,18-,19+,20?,21-/m1/s1	432.106	5-hydroxy-3-(2-hydroxyphenyl)-7-[(2S,4S,5S)-3,4,5-trihydroxy-6-(hydroxymethyl)tetrahydropyran-2-yl]oxy-chromen-4-one	44257268	C21H20O10	59.0128:[C2H4O2]-H-;89.0232:[C3H6O3]-H-;101.0236:[C4H7O3-H]-H-;125.0244:[C6H3O3+2H]-;205.073:[C8H12O6+H]-;284.0316:[C15H9O6]-H-;285.0404:[C15H9O6]-	15.607963828671746	59.0128_188.8;89.0232_90.6;101.0236_177.5;125.0244_187.2;205.073_113.5;284.0316_540.0;285.0404_999.0	11	7
113.66539379381015	1.4662	InChI=1S/C21H20O10/c22-10-3-1-9(2-4-10)12-7-30-14-6-11(5-13(23)16(14)17(12)24)29-8-15-18(25)19(26)20(27)21(28)31-15/h1-7,15,18-23,25-28H,8H2/t15-,18+,19+,20-,21+/m1/s1	432.106	5-hydroxy-3-(4-hydroxyphenyl)-7-[[(2R,3R,4S,5R,6S)-3,4,5,6-tetrahydroxytetrahydropyran-2-yl]methoxy]chromen-4-one	118713231	C21H20O10	59.0128:[C2H4O2]-H-;89.0232:[C3H6O3]-H-;101.0236:[C4H7O3-H]-H-;125.0244:[C6H3O3+2H]-;205.073:[C8H12O6+H]-;284.0316:[C15H10O6-H]-H-;285.0404:[C15H10O6]-H-	15.619127570730127	59.0128_188.8;89.0232_90.6;101.0236_177.5;125.0244_187.2;205.073_113.5;284.0316_540.0;285.0404_999.0	11	7
113.5741127666299	1.4651	InChI=1S/C21H20O10/c22-8-14-17(25)18(26)19(27)21(31-14)29-11-5-6-12-13(7-11)30-20(28)15(16(12)24)9-1-3-10(23)4-2-9/h1-7,14,17-19,21-27H,8H2/t14-,17-,18+,19-,21-/m1/s1	432.106	4-hydroxy-3-(4-hydroxyphenyl)-7-[(2S,3R,4S,5S,6R)-3,4,5-trihydroxy-6-(hydroxymethyl)tetrahydropyran-2-yl]oxy-chromen-2-one	90751377	C21H20O10	59.0128:[C2H4O2]-H-;89.0232:[C3H6O3]-H-;101.0236:[C4H7O3-H]-H-;125.0244:[C6H6O3]-H-;205.073:[C8H12O6+H]-;284.0316:[C15H9O6]-H-;285.0404:[C15H9O6]-	15.607963828671746	59.0128_188.8;89.0232_90.6;101.0236_177.5;125.0244_187.2;205.073_113.5;284.0316_540.0;285.0404_999.0	11	7
113.5741127666299	1.4651	InChI=1S/C21H20O10/c22-7-16-18(26)19(27)20(28)21(31-16)30-10-2-4-11(14(24)6-10)13-8-29-15-5-9(23)1-3-12(15)17(13)25/h1-6,8,16,18-24,26-28H,7H2/t16-,18-,19+,20-,21-/m1/s1	432.106	7-hydroxy-3-[2-hydroxy-4-[(2S,3R,4S,5S,6R)-3,4,5-trihydroxy-6-(hydroxymethyl)tetrahydropyran-2-yl]oxy-phenyl]chromen-4-one	101359856	C21H20O10	59.0128:[C2H4O2]-H-;89.0232:[C3H6O3]-H-;101.0236:[C4H7O3-H]-H-;125.0244:[C6H6O3]-H-;205.073:[C8H12O6+H]-;284.0316:[C15H9O6]-H-;285.0404:[C15H9O6]-	15.607963828671746	59.0128_188.8;89.0232_90.6;101.0236_177.5;125.0244_187.2;205.073_113.5;284.0316_540.0;285.0404_999.0	11	7
113.5741127666299	1.4651	InChI=1S/C21H20O10/c22-7-15-18(26)19(27)20(28)21(31-15)30-9-4-5-11-14(6-9)29-8-12(16(11)24)10-2-1-3-13(23)17(10)25/h1-6,8,15,18-23,25-28H,7H2	432.106	3-(2,3-dihydroxyphenyl)-7-[3,4,5-trihydroxy-6-(hydroxymethyl)tetrahydropyran-2-yl]oxy-chromen-4-one	353777	C21H20O10	59.0128:[C2H4O2]-H-;89.0232:[C3H6O3]-H-;101.0236:[C4H7O3-H]-H-;125.0244:[C6H6O3]-H-;205.073:[C8H12O6+H]-;284.0316:[C15H9O6]-H-;285.0404:[C15H9O6]-	15.607963828671746	59.0128_188.8;89.0232_90.6;101.0236_177.5;125.0244_187.2;205.073_113.5;284.0316_540.0;285.0404_999.0	11	7
113.5741127666299	1.4651	InChI=1S/C21H20O10/c22-7-16-18(26)19(27)20(28)21(31-16)30-10-2-3-11-15(6-10)29-8-12(17(11)25)9-1-4-13(23)14(24)5-9/h1-6,8,16,18-24,26-28H,7H2/t16-,18-,19+,20-,21+/m1/s1	432.106	3-(3,4-dihydroxyphenyl)-7-[(2R,3R,4S,5S,6R)-3,4,5-trihydroxy-6-(hydroxymethyl)tetrahydropyran-2-yl]oxy-chromen-4-one	91320024	C21H20O10	59.0128:[C2H4O2]-H-;89.0232:[C3H6O3]-H-;101.0236:[C4H7O3-H]-H-;125.0244:[C6H6O3]-H-;205.073:[C8H12O6+H]-;284.0316:[C15H9O6]-H-;285.0404:[C15H9O6]-	15.607963828671746	59.0128_188.8;89.0232_90.6;101.0236_177.5;125.0244_187.2;205.073_113.5;284.0316_540.0;285.0404_999.0	11	7
113.58792286828945	1.4649	InChI=1S/C21H20O10/c22-7-12-15(26)16(27)18(29)21(30-12)13-11(24)6-5-10-14(25)17(28)19(31-20(10)13)8-1-3-9(23)4-2-8/h1-6,12,15-16,18,21-24,26-29H,7H2/t12-,15-,16+,18-,21+/m1/s1	432.106	3,7-dihydroxy-2-(4-hydroxyphenyl)-8-[(2S,3R,4R,5S,6R)-3,4,5-trihydroxy-6-(hydroxymethyl)tetrahydropyran-2-yl]chromen-4-one	69823439	C21H20O10	59.0128:[C2H4O2]-H-;89.0232:[C3H6O3]-H-;101.0236:[C4H7O3-H]-H-;125.0244:[C6H4O3+H]-;205.073:[C8H12O6+H]-;284.0316:[C15H9O6]-H-;285.0404:[C15H9O6]-	15.603779824011587	59.0128_188.8;89.0232_90.6;101.0236_177.5;125.0244_187.2;205.073_113.5;284.0316_540.0;285.0404_999.0	11	7
136.21122280982394	1.4644	InChI=1S/C21H20O10/c1-7-2-9-15(18(27)14-10(16(9)25)4-8(23)5-11(14)24)12(3-7)30-21-20(29)19(28)17(26)13(6-22)31-21/h2-5,13,17,19-24,26,28-29H,6H2,1H3/t13?,17-,19+,20?,21-/m1/s1	432.106	1,3-dihydroxy-6-methyl-8-[(2S,4S,5S)-3,4,5-trihydroxy-6-(hydroxymethyl)tetrahydropyran-2-yl]oxy-anthracene-9,10-dione	58434462	C21H20O10	59.0128:[C2H4O2]-H-;89.0232:[C3H6O3]-H-;101.0236:[C4H7O3-H]-H-;125.0244:[C6H4O3+H]-;205.073:[C8H12O6+H]-;284.0316:[C15H7O6+H]-;285.0404:[C15H7O6+2H]-	13.97291048073702	59.0128_188.8;89.0232_90.6;101.0236_177.5;125.0244_187.2;205.073_113.5;284.0316_540.0;285.0404_999.0	11	7
113.26429588943316	1.4637	InChI=1S/C21H20O10/c22-7-14-16(26)17(27)18(28)21(30-14)31-20-13(24)6-5-11-15(25)12(8-29-19(11)20)9-1-3-10(23)4-2-9/h1-6,8,14,16-18,21-24,26-28H,7H2/t14-,16-,17-,18-,21+/m1/s1	432.106	7-hydroxy-3-(4-hydroxyphenyl)-8-[(2S,3R,4R,5S,6R)-3,4,5-trihydroxy-6-(hydroxymethyl)tetrahydropyran-2-yl]oxy-chromen-4-one	95048952	C21H20O10	59.0128:[C2H4O2]-H-;89.0232:[C3H6O3]-H-;101.0236:[C4H7O3-H]-H-;125.0244:[C6H3O3+2H]-;205.073:[C8H11O6+2H]-;284.0316:[C15H9O6]-H-;285.0404:[C15H9O6]-	15.607963828671746	59.0128_188.8;89.0232_90.6;101.0236_177.5;125.0244_187.2;205.073_113.5;284.0316_540.0;285.0404_999.0	11	7
135.90067377571216	1.463	InChI=1S/C21H20O10/c1-7-2-9-14(11(24)3-7)18(27)15-10(16(9)25)4-8(23)5-12(15)30-21-20(29)19(28)17(26)13(6-22)31-21/h2-5,13,17,19-24,26,28-29H,6H2,1H3/t13?,17-,19?,20?,21-/m1/s1	432.106	1,6-dihydroxy-3-methyl-8-[(2S,5S)-3,4,5-trihydroxy-6-(hydroxymethyl)tetrahydropyran-2-yl]oxy-anthracene-9,10-dione	118855584	C21H20O10	59.0128:[C2H4O2]-H-;89.0232:[C3H6O3]-H-;101.0236:[C4H7O3-H]-H-;125.0244:[C6H6O3]-H-;205.073:[C8H12O6+H]-;284.0316:[C15H7O6+H]-;285.0404:[C15H7O6+2H]-	13.97291048073702	59.0128_188.8;89.0232_90.6;101.0236_177.5;125.0244_187.2;205.073_113.5;284.0316_540.0;285.0404_999.0	11	7
135.90067377571216	1.463	InChI=1S/C21H20O10/c1-7-2-9-14(11(23)3-7)18(27)15-10(16(9)25)4-8(5-12(15)24)30-21-20(29)19(28)17(26)13(6-22)31-21/h2-5,13,17,19-24,26,28-29H,6H2,1H3/t13-,17-,19+,20-,21?/m0/s1	432.106	1,8-dihydroxy-3-methyl-6-[(3S,4R,5R,6S)-3,4,5-trihydroxy-6-(hydroxymethyl)tetrahydropyran-2-yl]oxy-anthracene-9,10-dione	44158949	C21H20O10	59.0128:[C2H4O2]-H-;89.0232:[C3H6O3]-H-;101.0236:[C4H7O3-H]-H-;125.0244:[C6H6O3]-H-;205.073:[C8H12O6+H]-;284.0316:[C15H7O6+H]-;285.0404:[C15H7O6+2H]-	13.97291048073702	59.0128_188.8;89.0232_90.6;101.0236_177.5;125.0244_187.2;205.073_113.5;284.0316_540.0;285.0404_999.0	11	7
175.84555482930799	1.462	InChI=1S/C21H20O10/c1-7-16(26)15-20(28)21(15,30-7)31-19-17(27)14-12(25)5-9(22)6-13(14)29-18(19)8-2-3-10(23)11(24)4-8/h2-7,15-16,18-20,22-26,28H,1H3	432.106	3-[(4,6-dihydroxy-3-methyl-2-oxabicyclo[3.1.0]hexan-1-yl)oxy]-2-(3,4-dihydroxyphenyl)-5,7-dihydroxy-chroman-4-one	20979938	C21H20O10	59.0128:[C2H3O2]-;89.0232:[C3H3O3+2H]-;101.0236:[C4H5O3]-;125.0244:[C6H4O3+H]-;284.0316:[C15H10O6-H]-H-;285.0404:[C15H11O6-H]-H-	11.09036150268371	59.0128_188.8;89.0232_90.6;101.0236_177.5;125.0244_187.2;284.0316_540.0;285.0404_999.0	11	6
112.60253216562224	1.4605	InChI=1S/C21H20O10/c22-7-14-16(26)17(27)19(29)20(31-14)9-3-1-8(2-4-9)13-6-11(23)10-5-12(24)15(25)18(28)21(10)30-13/h1-6,14,16-17,19-20,22,24-29H,7H2/t14-,16-,17+,19-,20+/m1/s1	432.106	6,7,8-trihydroxy-2-[4-[(2S,3R,4R,5S,6R)-3,4,5-trihydroxy-6-(hydroxymethyl)tetrahydropyran-2-yl]phenyl]chromen-4-one	87811743	C21H20O10	59.0128:[C2H4O2]-H-;89.0232:[C3H6O3]-H-;101.0236:[C4H7O3-H]-H-;125.0244:[C6H4O3+H]-;284.0316:[C15H9O6]-H-;285.0404:[C15H9O6]-	15.603779824011587	59.0128_188.8;89.0232_90.6;101.0236_177.5;125.0244_187.2;284.0316_540.0;285.0404_999.0	11	6
134.65085657279442	1.4575	InChI=1S/C21H20O10/c1-7-5-9-13(16(26)12-8(14(9)24)3-2-4-10(12)23)17(27)20(7)31-21-19(29)18(28)15(25)11(6-22)30-21/h2-5,11,15,18-19,21-23,25,27-29H,6H2,1H3/t11?,15-,18?,19?,21+/m0/s1	432.106	1,8-dihydroxy-3-methyl-2-[(2R,5R)-3,4,5-trihydroxy-6-(hydroxymethyl)tetrahydropyran-2-yl]oxy-anthracene-9,10-dione	91099227	C21H20O10	59.0128:[C2H4O2]-H-;89.0232:[C3H6O3]-H-;101.0236:[C4H7O3-H]-H-;125.0244:[C6H6O3]-H-;205.073:[C8H11O6+2H]-;284.0316:[C15H7O6+H]-;285.0404:[C15H7O6+2H]-	13.97291048073702	59.0128_188.8;89.0232_90.6;101.0236_177.5;125.0244_187.2;205.073_113.5;284.0316_540.0;285.0404_999.0	11	7
119.80046368828434	1.4573	InChI=1S/C21H20O10/c22-9-17-18(25)19(26)20(27)21(29-17)31-30-12-5-6-13-14(24)8-15(28-16(13)7-12)10-1-3-11(23)4-2-10/h1-8,17-23,25-27H,9H2/t17-,18-,19+,20-,21+/m1/s1	432.106	2-(4-hydroxyphenyl)-7-[(2S,3R,4S,5S,6R)-3,4,5-trihydroxy-6-(hydroxymethyl)tetrahydropyran-2-yl]peroxy-chromen-4-one	91315835	C21H20O10	59.0128:[C2H4O2]-H-;89.0232:[C3H6O3]-H-;101.0236:[C4H7O3-H]-H-;125.0244:[C6H3O3+2H]-;205.073:[C8H11O6+2H]-;284.0316:[C15H9O6]-H-;285.0404:[C15H9O6]-	15.034368126730921	59.0128_188.8;89.0232_90.6;101.0236_177.5;125.0244_187.2;205.073_113.5;284.0316_540.0;285.0404_999.0	11	7
115.19593329671162	1.4556	InChI=1S/C21H20O10/c22-7-15-20(18(26)19(27)21(28)31-15)30-11-3-1-9(2-4-11)12-8-29-14-6-10(23)5-13(24)16(14)17(12)25/h1-6,8,15,18-24,26-28H,7H2/t15-,18-,19-,20-,21-/m0/s1	432.106	5,7-dihydroxy-3-[4-[(2S,3R,4S,5S,6S)-4,5,6-trihydroxy-2-(hydroxymethyl)tetrahydropyran-3-yl]oxyphenyl]chromen-4-one	100918395	C21H20O10	59.0128:[C2H4O2]-H-;89.0232:[C3H6O3]-H-;101.0236:[C4H7O3-H]-H-;125.0244:[C6H4O3+H]-;205.073:[C8H12O6+H]-;284.0316:[C15H10O6-H]-H-;285.0404:[C15H10O6]-H-	15.338066001329723	59.0128_188.8;89.0232_90.6;101.0236_177.5;125.0244_187.2;205.073_113.5;284.0316_540.0;285.0404_999.0	11	7
110.36527046211964	1.4506	InChI=1S/C21H20O10/c22-7-16-18(27)19(28)20(29)21(31-16)9-4-12(25)17-13(26)6-14(30-15(17)5-9)8-1-2-10(23)11(24)3-8/h1-6,16,18-25,27-29H,7H2/t16-,18-,19+,20-,21+/m1/s1	432.106	2-(3,4-dihydroxyphenyl)-5-hydroxy-7-[(2S,3R,4R,5S,6R)-3,4,5-trihydroxy-6-(hydroxymethyl)tetrahydropyran-2-yl]chromen-4-one	13871824	C21H20O10	59.0128:[C2H4O2]-H-;89.0232:[C3H6O3]-H-;101.0236:[C4H7O3-H]-H-;125.0244:[C6H6O3]-H-;284.0316:[C15H9O6]-H-;285.0404:[C15H9O6]-	15.603779824011587	59.0128_188.8;89.0232_90.6;101.0236_177.5;125.0244_187.2;284.0316_540.0;285.0404_999.0	11	6
127.30699222070335	1.4485	InChI=1S/C21H20O10/c22-8-16-17(26)18(27)19(28)21(31-16)30-15-7-12-13(25)5-11(24)6-14(12)29-20(15)9-1-3-10(23)4-2-9/h1-7,16-19,21-23,25-28H,8H2/t16-,17-,18+,19-,21-/m1/s1	432.106	5-hydroxy-2-(4-hydroxyphenyl)-3-[(2S,3R,4S,5S,6R)-3,4,5-trihydroxy-6-(hydroxymethyl)tetrahydropyran-2-yl]oxy-chromen-7-one	443649	C21H20O10	59.0128:[C2H4O2]-H-;89.0232:[C3H6O3]-H-;101.0236:[C4H7O3-H]-H-;125.0244:[C6H3O3+2H]-;205.073:[C8H11O6+2H]-;284.0316:[C15H10O6-H]-H-;285.0404:[C15H10O6]-H-	14.353020862531599	59.0128_188.8;89.0232_90.6;101.0236_177.5;125.0244_187.2;205.073_113.5;284.0316_540.0;285.0404_999.0	11	7
116.07443881011572	1.4394	InChI=1S/C21H20O10/c22-7-13-16(26)18(28)19(29)21(31-13)20-14(8-1-3-9(23)4-2-8)17(27)15-11(25)5-10(24)6-12(15)30-20/h1-6,13,16,18-19,21-26,28-29H,7H2/t13-,16-,18+,19-,21?/m1/s1	432.106	5,7-dihydroxy-3-(4-hydroxyphenyl)-2-[(3R,4S,5S,6R)-3,4,5-trihydroxy-6-(hydroxymethyl)tetrahydropyran-2-yl]chromen-4-one	70130549	C21H20O10	59.0128:[C2H4O2]-H-;89.0232:[C3H6O3]-H-;101.0236:[C4H7O3-H]-H-;125.0244:[C6H4O3+H]-;205.073:[C8H11O6+2H]-;284.0316:[C15H9O6]-H-;285.0404:[C15H9O6]-	15.012612307450492	59.0128_188.8;89.0232_90.6;101.0236_177.5;125.0244_187.2;205.073_113.5;284.0316_540.0;285.0404_999.0	11	7
116.07443881011572	1.4394	InChI=1S/C21H20O10/c22-7-13-16(26)18(28)19(29)21(31-13)15-17(27)14-11(25)5-10(24)6-12(14)30-20(15)8-1-3-9(23)4-2-8/h1-6,13,16,18-19,21-26,28-29H,7H2/t13-,16-,18+,19-,21?/m1/s1	432.106	5,7-dihydroxy-2-(4-hydroxyphenyl)-3-[(3R,4R,5S,6R)-3,4,5-trihydroxy-6-(hydroxymethyl)tetrahydropyran-2-yl]chromen-4-one	69170800	C21H20O10	59.0128:[C2H4O2]-H-;89.0232:[C3H6O3]-H-;101.0236:[C4H7O3-H]-H-;125.0244:[C6H4O3+H]-;205.073:[C8H11O6+2H]-;284.0316:[C15H9O6]-H-;285.0404:[C15H9O6]-	15.012612307450492	59.0128_188.8;89.0232_90.6;101.0236_177.5;125.0244_187.2;205.073_113.5;284.0316_540.0;285.0404_999.0	11	7
116.07443881011572	1.4394	InChI=1S/C21H20O10/c22-7-14-17(27)18(28)19(29)21(31-14)15-16(26)10-5-11(24)12(25)6-13(10)30-20(15)8-1-3-9(23)4-2-8/h1-6,14,17-19,21-25,27-29H,7H2/t14-,17-,18+,19-,21+/m1/s1	432.106	6,7-dihydroxy-2-(4-hydroxyphenyl)-3-[(2S,3R,4R,5S,6R)-3,4,5-trihydroxy-6-(hydroxymethyl)tetrahydropyran-2-yl]chromen-4-one	24860198	C21H20O10	59.0128:[C2H4O2]-H-;89.0232:[C3H6O3]-H-;101.0236:[C4H7O3-H]-H-;125.0244:[C6H4O3+H]-;205.073:[C8H11O6+2H]-;284.0316:[C15H9O6]-H-;285.0404:[C15H9O6]-	15.012612307450492	59.0128_188.8;89.0232_90.6;101.0236_177.5;125.0244_187.2;205.073_113.5;284.0316_540.0;285.0404_999.0	11	7
137.142821106614	1.4342	InChI=1S/C21H20O10/c1-29-20-13-10(14(23)8-4-2-3-5-9(8)15(13)24)6-11(17(20)26)30-21-19(28)18(27)16(25)12(7-22)31-21/h2-6,12,16,18-19,21-22,25-28H,7H2,1H3/t12-,16-,18+,19-,21-/m1/s1	432.106	2-hydroxy-1-methoxy-3-[(2S,3R,4S,5S,6R)-3,4,5-trihydroxy-6-(hydroxymethyl)tetrahydropyran-2-yl]oxy-anthracene-9,10-dione	101993110	C21H20O10	59.0128:[C2H4O2]-H-;89.0232:[C3H6O3]-H-;100.9666:[C6O2-2H]-H-;101.0236:[C4H7O3-H]-H-;125.0244:[C6H6O3]-H-;205.073:[C8H12O6+H]-;284.0316:[C15H7O6+H]-;285.0404:[C15H7O6+2H]-	13.416790057884576	59.0128_188.8;89.0232_90.6;100.9666_99.2;101.0236_177.5;125.0244_187.2;205.073_113.5;284.0316_540.0;285.0404_999.0	11	8
114.58329798432491	1.4328	InChI=1S/C21H20O10/c22-6-13-17(27)18(28)19(29)21(31-13)15-12(25)5-11(24)14-16(26)10(7-30-20(14)15)8-1-3-9(23)4-2-8/h1-5,7,13,17-19,21-25,27-29H,6H2/t13-,17-,18-,19+,21-/m1/s1	432.106	5,7-dihydroxy-3-(4-hydroxyphenyl)-8-[(2R,3S,4S,5S,6R)-3,4,5-trihydroxy-6-(hydroxymethyl)tetrahydropyran-2-yl]chromen-4-one	100853404	C21H20O10	59.0128:[C2H4O2]-H-;89.0232:[C3H6O3]-H-;101.0236:[C4H7O3-H]-H-;125.0244:[C6H3O3+2H]-;205.073:[C8H12O6+H]-;284.0316:[C15H9O6]-H-;285.0404:[C15H9O6]-	15.012612307450492	59.0128_188.8;89.0232_90.6;101.0236_177.5;125.0244_187.2;205.073_113.5;284.0316_540.0;285.0404_999.0	11	7
114.58329798432491	1.4328	InChI=1S/C21H20O10/c22-6-13-17(26)19(28)20(29)21(31-13)14-11(24)5-12-15(18(14)27)16(25)10(7-30-12)8-1-3-9(23)4-2-8/h1-5,7,13,17,19-24,26-29H,6H2/t13-,17-,19+,20-,21+/m0/s1	432.106	5,7-dihydroxy-3-(4-hydroxyphenyl)-6-[(2R,3S,4S,5R,6S)-3,4,5-trihydroxy-6-(hydroxymethyl)tetrahydropyran-2-yl]chromen-4-one	49862187	C21H20O10	59.0128:[C2H4O2]-H-;89.0232:[C3H6O3]-H-;101.0236:[C4H7O3-H]-H-;125.0244:[C6H3O3+2H]-;205.073:[C8H12O6+H]-;284.0316:[C15H9O6]-H-;285.0404:[C15H9O6]-	15.012612307450492	59.0128_188.8;89.0232_90.6;101.0236_177.5;125.0244_187.2;205.073_113.5;284.0316_540.0;285.0404_999.0	11	7
123.0637519768456	1.4297	InChI=1S/C21H20O10/c22-8-17-18(26)19(27)20(28)21(31-17)30-16-7-10(23)6-15-11(16)2-4-14(29-15)9-1-3-12(24)13(25)5-9/h1-7,17-22,24-28H,8H2/t17-,18-,19+,20-,21-/m1/s1	432.106	2-(3,4-dihydroxyphenyl)-5-[(2S,3R,4S,5S,6R)-3,4,5-trihydroxy-6-(hydroxymethyl)tetrahydropyran-2-yl]oxy-chromen-7-one	90657490	C21H20O10	59.0128:[C2H4O2]-H-;89.0232:[C3H6O3]-H-;101.0236:[C4H7O3-H]-H-;125.0244:[C6H5O3]-;205.073:[C8H12O6+H]-;284.0316:[C15H9O6]-H-;285.0404:[C15H9O6]-	14.353020862531599	59.0128_188.8;89.0232_90.6;101.0236_177.5;125.0244_187.2;205.073_113.5;284.0316_540.0;285.0404_999.0	11	7
113.48866063483439	1.428	InChI=1S/C21H20O10/c22-6-14-17(27)18(28)19(29)21(31-14)15-12(24)4-2-9-16(26)10(7-30-20(9)15)8-1-3-11(23)13(25)5-8/h1-5,7,14,17-19,21-25,27-29H,6H2/t14-,17-,18+,19-,21?/m1/s1	432.106	3-(3,4-dihydroxyphenyl)-7-hydroxy-8-[(3R,4R,5S,6R)-3,4,5-trihydroxy-6-(hydroxymethyl)tetrahydropyran-2-yl]chromen-4-one	91050425	C21H20O10	59.0128:[C2H4O2]-H-;89.0232:[C3H6O3]-H-;101.0236:[C4H7O3-H]-H-;125.0244:[C6H4O3+H]-;205.073:[C8H12O6+H]-;284.0316:[C15H9O6]-H-;285.0404:[C15H9O6]-	15.012612307450492	59.0128_188.8;89.0232_90.6;101.0236_177.5;125.0244_187.2;205.073_113.5;284.0316_540.0;285.0404_999.0	11	7
122.42616702055031	1.4273	InChI=1S/C21H20O10/c22-8-11(24)20-18(27)19(28)21(31-20)30-14-7-13-15(17(26)16(14)25)10(23)6-12(29-13)9-4-2-1-3-5-9/h1-7,11,18-22,24-28H,8H2/t11-,18?,19?,20?,21?/m1/s1	432.106	7-[5-[(1R)-1,2-dihydroxyethyl]-3,4-dihydroxy-tetrahydrofuran-2-yl]oxy-5,6-dihydroxy-2-phenyl-chromen-4-one	69753459	C21H20O10	59.0128:[C2H5O2-H]-H-;89.0232:[C3H6O3]-H-;101.0236:[C4H6O3]-H-;125.0244:[C6H3O3+2H]-;205.073:[C8H12O6+H]-;284.0316:[C15H9O6]-H-;285.0404:[C15H9O6]-	14.359717071772577	59.0128_188.8;89.0232_90.6;101.0236_177.5;125.0244_187.2;205.073_113.5;284.0316_540.0;285.0404_999.0	11	7
126.68468630075151	1.42	InChI=1S/C21H20O10/c22-7-13-16(24)18(26)19(27)21(31-13)30-12-3-1-2-8-4-9-5-10(20(28)29)6-11(23)14(9)17(25)15(8)12/h1-3,5-6,13,16,18-19,21-24,26-27H,4,7H2,(H,28,29)/t13-,16-,18+,19-,21-/m1/s1	432.106	4-hydroxy-10-oxo-5-[(2S,3R,4S,5S,6R)-3,4,5-trihydroxy-6-(hydroxymethyl)tetrahydropyran-2-yl]oxy-9H-anthracene-2-carboxylic acid	101656112	C21H20O10	59.0128:[C2H4O2]-H-;89.0232:[C3H6O3]-H-;101.0236:[C4H7O3-H]-H-;125.0244:[C6H4O3+H]-;205.073:[C8H12O6+H]-;284.0316:[C15H8O6]-;285.0404:[C15H8O6+H]-	13.936595697717914	59.0128_188.8;89.0232_90.6;101.0236_177.5;125.0244_187.2;205.073_113.5;284.0316_540.0;285.0404_999.0	11	7
135.06975809872148	1.418	InChI=1S/C21H20O10/c22-7-15-17(27)19(29)21(30-15)31-20-12(11-2-1-9(23)5-13(11)25)4-8-3-10(24)6-14(26)16(8)18(20)28/h1-3,5-6,15,17,19,21-27,29H,4,7H2	432.106	2-[3,4-dihydroxy-5-(hydroxymethyl)tetrahydrofuran-2-yl]oxy-3-(2,4-dihydroxyphenyl)-6,8-dihydroxy-4H-naphthalen-1-one	71027935	C21H20O10	59.0128:[C2H4O2]-H-;89.0232:[C3H6O3]-H-;101.0236:[C4H6O3]-H-;125.0244:[C6H4O3+H]-;284.0316:[C15H9O6]-H-;285.0404:[C15H9O6]-	13.301683446572806	59.0128_188.8;89.0232_90.6;101.0236_177.5;125.0244_187.2;284.0316_540.0;285.0404_999.0	11	6
135.06975809872148	1.418	InChI=1S/C21H20O10/c22-7-15-17(27)19(29)21(30-15)31-20-11(8-1-2-12(24)13(25)5-8)4-9-3-10(23)6-14(26)16(9)18(20)28/h1-3,5-6,15,17,19,21-27,29H,4,7H2	432.106	2-[3,4-dihydroxy-5-(hydroxymethyl)tetrahydrofuran-2-yl]oxy-3-(3,4-dihydroxyphenyl)-6,8-dihydroxy-4H-naphthalen-1-one	71027939	C21H20O10	59.0128:[C2H4O2]-H-;89.0232:[C3H6O3]-H-;101.0236:[C4H6O3]-H-;125.0244:[C6H4O3+H]-;284.0316:[C15H9O6]-H-;285.0404:[C15H9O6]-	13.301683446572806	59.0128_188.8;89.0232_90.6;101.0236_177.5;125.0244_187.2;284.0316_540.0;285.0404_999.0	11	6
113.5741127666299	1.3972	InChI=1S/C21H20O10/c22-8-15-17(25)18(26)19(27)21(31-15)30-13-3-1-2-10-14(29-20(28)16(10)13)7-9-4-5-11(23)12(24)6-9/h1-7,15,17-19,21-27H,8H2/b14-7-/t15-,17-,18+,19-,21-/m1/s1	432.106	(3Z)-3-[(3,4-dihydroxyphenyl)methylene]-7-[(2S,3R,4S,5S,6R)-3,4,5-trihydroxy-6-(hydroxymethyl)tetrahydropyran-2-yl]oxy-isobenzofuran-1-one	53359351	C21H20O10	59.0128:[C2H4O2]-H-;89.0232:[C3H6O3]-H-;101.0236:[C4H7O3-H]-H-;125.0244:[C6H6O3]-H-;205.073:[C8H12O6+H]-;284.0316:[C15H9O6]-H-;285.0404:[C15H9O6]-	14.506763212249329	59.0128_188.8;89.0232_90.6;101.0236_177.5;125.0244_187.2;205.073_113.5;284.0316_540.0;285.0404_999.0	11	7
113.5741127666299	1.3972	InChI=1S/C21H20O10/c22-8-16-18(26)19(27)20(28)21(31-16)29-10-2-3-11-14(7-10)30-15(17(11)25)6-9-1-4-12(23)13(24)5-9/h1-7,16,18-24,26-28H,8H2/b15-6-/t16?,18-,19+,20?,21-/m1/s1	432.106	(2Z)-2-[(3,4-dihydroxyphenyl)methylene]-6-[(2S,4S,5S)-3,4,5-trihydroxy-6-(hydroxymethyl)tetrahydropyran-2-yl]oxy-benzofuran-3-one	87440063	C21H20O10	59.0128:[C2H4O2]-H-;89.0232:[C3H6O3]-H-;101.0236:[C4H7O3-H]-H-;125.0244:[C6H6O3]-H-;205.073:[C8H12O6+H]-;284.0316:[C15H9O6]-H-;285.0404:[C15H9O6]-	14.506763212249329	59.0128_188.8;89.0232_90.6;101.0236_177.5;125.0244_187.2;205.073_113.5;284.0316_540.0;285.0404_999.0	11	7
113.5741127666299	1.3972	InChI=1S/C21H20O10/c22-8-15-18(25)19(26)20(27)21(31-15)29-12-4-2-11(3-5-12)28-9-16-17(24)13-6-1-10(23)7-14(13)30-16/h1-7,9,15,18-23,25-27H,8H2/b16-9-/t15-,18-,19+,20-,21-/m1/s1	432.106	(2Z)-6-hydroxy-2-[[4-[(2S,3R,4S,5S,6R)-3,4,5-trihydroxy-6-(hydroxymethyl)tetrahydropyran-2-yl]oxyphenoxy]methylene]benzofuran-3-one	91820331	C21H20O10	59.0128:[C2H4O2]-H-;89.0232:[C3H6O3]-H-;101.0236:[C4H7O3-H]-H-;125.0244:[C6H6O3]-H-;205.073:[C8H12O6+H]-;284.0316:[C15H9O6]-H-;285.0404:[C15H9O6]-	14.506763212249329	59.0128_188.8;89.0232_90.6;101.0236_177.5;125.0244_187.2;205.073_113.5;284.0316_540.0;285.0404_999.0	11	7
113.5741127666299	1.3972	InChI=1S/C21H20O10/c22-8-16-18(26)19(27)20(28)21(31-16)30-14-5-9(1-4-12(14)24)6-15-17(25)11-3-2-10(23)7-13(11)29-15/h1-7,16,18-24,26-28H,8H2/b15-6-/t16-,18-,19+,20-,21-/m1/s1	432.106	(2Z)-6-hydroxy-2-[[4-hydroxy-3-[(2S,3R,4S,5S,6R)-3,4,5-trihydroxy-6-(hydroxymethyl)tetrahydropyran-2-yl]oxy-phenyl]methylene]benzofuran-3-one	54597953	C21H20O10	59.0128:[C2H4O2]-H-;89.0232:[C3H6O3]-H-;101.0236:[C4H7O3-H]-H-;125.0244:[C6H6O3]-H-;205.073:[C8H12O6+H]-;284.0316:[C15H9O6]-H-;285.0404:[C15H9O6]-	14.506763212249329	59.0128_188.8;89.0232_90.6;101.0236_177.5;125.0244_187.2;205.073_113.5;284.0316_540.0;285.0404_999.0	11	7
121.1194657831761	1.389	InChI=1S/C21H20O10/c1-29-21-19(28)17(26)18(27)20(31-21)15-11(24)7-13-14(16(15)25)10(23)6-12(30-13)8-2-4-9(22)5-3-8/h2-7,17-22,24-28H,1H3/t17?,18?,19-,20-,21?/m0/s1	432.106	5,7-dihydroxy-2-(4-hydroxyphenyl)-6-[(2S,5S)-3,4,5-trihydroxy-6-methoxy-tetrahydropyran-2-yl]chromen-4-one	89290112	C21H20O10	59.0128:[C2H4O2]-H-;89.0232:[C3H6O3]-H-;101.0236:[C4H7O3-H]-H-;125.0244:[C6H3O3+2H]-;205.073:[C8H12O6+H]-;284.0316:[C15H9O6]-H-;285.0404:[C15H9O6]-	13.832781087866358	59.0128_188.8;89.0232_90.6;101.0236_177.5;125.0244_187.2;205.073_113.5;284.0316_540.0;285.0404_999.0	11	7
121.07724326170481	1.3888	InChI=1S/C21H20O10/c1-28-20-18(26)17(25)19(27)21(31-20)29-11-6-12(23)16-13(24)8-14(30-15(16)7-11)9-2-4-10(22)5-3-9/h2-8,17-23,25-27H,1H3/t17-,18-,19+,20-,21+/m0/s1	432.106	5-hydroxy-2-(4-hydroxyphenyl)-7-[(2R,3R,4S,5S,6S)-3,4,5-trihydroxy-6-methoxy-tetrahydropyran-2-yl]oxy-chromen-4-one	86574195	C21H20O10	59.0128:[C2H4O2]-H-;89.0232:[C3H6O3]-H-;101.0236:[C4H7O3-H]-H-;125.0244:[C6H3O3+2H]-;205.073:[C8H12O6+H]-;284.0316:[C15H9O6]-H-;285.0404:[C15H9O6]-	13.832781087866358	59.0128_188.8;89.0232_90.6;101.0236_177.5;125.0244_187.2;205.073_113.5;284.0316_540.0;285.0404_999.0	11	7
124.20850854511427	1.3827	InChI=1S/C21H20O10/c22-8-13(25)17(27)19(29)20(30)18(28)15-16(26)10-3-1-2-4-14(10)31-21(15)9-5-6-11(23)12(24)7-9/h1-7,13,17,19-20,22-25,27,29-30H,8H2/t13-,17-,19+,20+/m1/s1	432.106	2-(3,4-dihydroxyphenyl)-3-[(2R,3S,4R,5R)-2,3,4,5,6-pentahydroxyhexanoyl]chromen-4-one	68933807	C21H20O10	59.0128:[C2H5O2-H]-H-;89.0232:[C3H7O3-H]-H-;101.0236:[C4H8O3-2H]-H-;125.0244:[C6H4O3+H]-;205.073:[C8H11O6+2H]-;284.0316:[C15H9O6]-H-;285.0404:[C15H9O6]-	13.509783307582786	59.0128_188.8;89.0232_90.6;101.0236_177.5;125.0244_187.2;205.073_113.5;284.0316_540.0;285.0404_999.0	11	7
115.8113744701325	1.373	InChI=1S/C21H20O10/c22-8-16-17(25)18(26)19(27)21(31-16)29-10-3-1-9(2-4-10)5-12-11-6-13(23)14(24)7-15(11)30-20(12)28/h1-7,16-19,21-27H,8H2/b12-5-/t16-,17-,18+,19-,21?/m1/s1	432.106	(3Z)-5,6-dihydroxy-3-[[4-[(3R,4S,5S,6R)-3,4,5-trihydroxy-6-(hydroxymethyl)tetrahydropyran-2-yl]oxyphenyl]methylene]benzofuran-2-one	102491274	C21H20O10	59.0128:[C2H4O2]-H-;89.0232:[C3H6O3]-H-;101.0236:[C4H7O3-H]-H-;125.0244:[C6H4O3+H]-;205.073:[C8H12O6+H]-;284.0316:[C15H9O6]-H-;285.0404:[C15H9O6]-	13.95472539157375	59.0128_188.8;89.0232_90.6;101.0236_177.5;125.0244_187.2;205.073_113.5;284.0316_540.0;285.0404_999.0	11	7
115.72687045445352	1.3715	InChI=1S/C21H20O10/c22-6-12-18(27)19(28)20(29)21(31-12)30-7-8-5-11(23)13-14(15(8)24)17(26)10-4-2-1-3-9(10)16(13)25/h1-5,12,18-24,27-29H,6-7H2/t12-,18-,19+,20+,21+/m1/s1	432.106	1,4-dihydroxy-2-[[(2S,3S,4S,5S,6R)-3,4,5-trihydroxy-6-(hydroxymethyl)tetrahydropyran-2-yl]oxymethyl]anthracene-9,10-dione	53390992	C21H20O10	59.0128:[C2H4O2]-H-;89.0232:[C3H6O3]-H-;100.9666:[C6O2-2H]-H-;101.0236:[C4H7O3-H]-H-;125.0244:[C6H6O3]-H-;205.073:[C8H13O6]-;284.0316:[C15H9O6]-H-;285.0404:[C15H9O6]-	13.936595697717914	59.0128_188.8;89.0232_90.6;100.9666_99.2;101.0236_177.5;125.0244_187.2;205.073_113.5;284.0316_540.0;285.0404_999.0	11	8
119.08840981571171	1.3703	InChI=1S/C21H20O10/c22-10-3-1-9(2-4-10)13-8-29-14-7-11(5-6-12(14)15(13)23)30-21-18(26)16(24)17(25)19(31-21)20(27)28/h1-7,13,16-19,21-22,24-26H,8H2,(H,27,28)/t13?,16-,17-,18+,19-,21?/m0/s1	432.106	(2S,3S,4S,5R)-3,4,5-trihydroxy-6-[3-(4-hydroxyphenyl)-4-oxo-chroman-7-yl]oxy-tetrahydropyran-2-carboxylic acid	122421244	C21H20O10	59.0128:[C2H4O2]-H-;89.0232:[C3H6O3]-H-;101.0236:[C4H5O3]-;125.0244:[C6H6O3]-H-;191.0196:[C6H9O7-H]-H-;284.0316:[C15H11O6-2H]-H-;285.0404:[C15H11O6-H]-H-	13.674850715487409	59.0128_188.8;89.0232_90.6;101.0236_177.5;125.0244_187.2;191.0196_169.7;284.0316_540.0;285.0404_999.0	11	7
115.34167189063858	1.3698	InChI=1S/C21H20O10/c22-6-11-12(30-21-20(29)19(28)18(27)13(7-23)31-21)5-10-14(17(11)26)16(25)9-4-2-1-3-8(9)15(10)24/h1-5,13,18-23,26-29H,6-7H2/t13-,18-,19+,20-,21-/m1/s1	432.106	1-hydroxy-2-(hydroxymethyl)-3-[(2S,3R,4S,5S,6R)-3,4,5-trihydroxy-6-(hydroxymethyl)tetrahydropyran-2-yl]oxy-anthracene-9,10-dione	101938917	C21H20O10	59.0128:[C2H4O2]-H-;89.0232:[C3H6O3]-H-;100.9666:[C6O2-2H]-H-;101.0236:[C4H7O3-H]-H-;125.0244:[C6H6O3]-H-;205.073:[C8H12O6+H]-;284.0316:[C15H9O6]-H-;285.0404:[C15H9O6]-	13.936595697717914	59.0128_188.8;89.0232_90.6;100.9666_99.2;101.0236_177.5;125.0244_187.2;205.073_113.5;284.0316_540.0;285.0404_999.0	11	8
119.08840981571171	1.3677	InChI=1S/C21H20O10/c22-10-3-6-12-13(23)8-14(30-15(12)7-10)9-1-4-11(5-2-9)29-21-18(26)16(24)17(25)19(31-21)20(27)28/h1-7,14,16-19,21-22,24-26H,8H2,(H,27,28)/t14-,16-,17-,18+,19-,21+/m0/s1	432.106	(2S,3S,4S,5R,6S)-3,4,5-trihydroxy-6-[4-[(2S)-7-hydroxy-4-oxo-chroman-2-yl]phenoxy]tetrahydropyran-2-carboxylic acid	102065875	C21H20O10	59.0128:[C2H4O2]-H-;89.0232:[C3H6O3]-H-;101.0236:[C4H5O3]-;125.0244:[C6H6O3]-H-;191.0196:[C6H9O7-H]-H-;284.0316:[C15H11O6-2H]-H-;285.0404:[C15H11O6-H]-H-	13.632908359213522	59.0128_188.8;89.0232_90.6;101.0236_177.5;125.0244_187.2;191.0196_169.7;284.0316_540.0;285.0404_999.0	11	7
119.08840981571171	1.3677	InChI=1S/C21H20O10/c22-10-3-1-9(2-4-10)14-8-13(23)12-6-5-11(7-15(12)30-14)29-21-18(26)16(24)17(25)19(31-21)20(27)28/h1-7,14,16-19,21-22,24-26H,8H2,(H,27,28)/t14-,16-,17-,18+,19-,21+/m0/s1	432.106	(2S,3S,4S,5R,6S)-3,4,5-trihydroxy-6-[(2S)-2-(4-hydroxyphenyl)-4-oxo-chroman-7-yl]oxy-tetrahydropyran-2-carboxylic acid	102065876	C21H20O10	59.0128:[C2H4O2]-H-;89.0232:[C3H6O3]-H-;101.0236:[C4H5O3]-;125.0244:[C6H6O3]-H-;191.0196:[C6H9O7-H]-H-;284.0316:[C15H11O6-2H]-H-;285.0404:[C15H11O6-H]-H-	13.632908359213522	59.0128_188.8;89.0232_90.6;101.0236_177.5;125.0244_187.2;191.0196_169.7;284.0316_540.0;285.0404_999.0	11	7
113.8551661613819	1.3655	InChI=1S/C21H20O10/c1-7-2-9-14(11(24)3-7)18(27)15-10(16(9)25)4-8(23)5-12(15)30-20-19(28)17(26)13(6-22)31-21(20)29/h2-5,13,17,19-24,26,28-29H,6H2,1H3/t13-,17-,19+,20-,21-/m1/s1	432.106	1,6-dihydroxy-3-methyl-8-[(2R,3R,4S,5S,6R)-2,4,5-trihydroxy-6-(hydroxymethyl)tetrahydropyran-3-yl]oxy-anthracene-9,10-dione	21117421	C21H20O10	59.0128:[C2H4O2]-H-;89.0232:[C3H6O3]-H-;101.0236:[C4H7O3-H]-H-;125.0244:[C6H6O3]-H-;205.073:[C8H12O6+H]-;284.0316:[C15H9O6]-H-;285.0404:[C15H9O6]-	13.97291048073702	59.0128_188.8;89.0232_90.6;101.0236_177.5;125.0244_187.2;205.073_113.5;284.0316_540.0;285.0404_999.0	11	7
114.18226247449525	1.3647	InChI=1S/C21H20O10/c22-6-8-4-10-14(11(24)5-8)18(27)15-9(16(10)25)2-1-3-12(15)30-21-20(29)19(28)17(26)13(7-23)31-21/h1-5,13,17,19-24,26,28-29H,6-7H2/t13-,17-,19-,20+,21+/m1/s1	432.106	1-hydroxy-3-(hydroxymethyl)-8-[(2R,3S,4R,5S,6R)-3,4,5-trihydroxy-6-(hydroxymethyl)tetrahydropyran-2-yl]oxy-anthracene-9,10-dione	100090610	C21H20O10	59.0128:[C2H4O2]-H-;89.0232:[C3H6O3]-H-;101.0236:[C4H7O3-H]-H-;125.0244:[C6H5O3]-;205.073:[C8H12O6+H]-;284.0316:[C15H9O6]-H-;285.0404:[C15H10O6]-H-	13.936595697717914	59.0128_188.8;89.0232_90.6;101.0236_177.5;125.0244_187.2;205.073_113.5;284.0316_540.0;285.0404_999.0	11	7
113.95931133044483	1.3637	InChI=1S/C21H20O10/c22-6-13-17(26)19(28)20(29)21(31-13)30-7-8-4-10-15(12(24)5-8)18(27)14-9(16(10)25)2-1-3-11(14)23/h1-5,13,17,19-24,26,28-29H,6-7H2/t13-,17-,19+,20+,21+/m0/s1	432.106	1,8-dihydroxy-3-[[(2R,3R,4R,5R,6S)-3,4,5-trihydroxy-6-(hydroxymethyl)tetrahydropyran-2-yl]oxymethyl]anthracene-9,10-dione	101405539	C21H20O10	59.0128:[C2H4O2]-H-;89.0232:[C3H6O3]-H-;101.0236:[C4H7O3-H]-H-;125.0244:[C6H6O3]-H-;205.073:[C8H13O6]-;284.0316:[C15H9O6]-H-;285.0404:[C15H9O6]-	13.936595697717914	59.0128_188.8;89.0232_90.6;101.0236_177.5;125.0244_187.2;205.073_113.5;284.0316_540.0;285.0404_999.0	11	7
113.7326476563779	1.3627	InChI=1S/C21H20O10/c22-6-8-4-10-15(18(27)14-9(16(10)25)2-1-3-11(14)24)12(5-8)30-21-20(29)19(28)17(26)13(7-23)31-21/h1-5,13,17,19-24,26,28-29H,6-7H2/t13-,17-,19+,20-,21-/m1/s1	432.106	8-hydroxy-3-(hydroxymethyl)-1-[(2S,3R,4S,5S,6R)-3,4,5-trihydroxy-6-(hydroxymethyl)tetrahydropyran-2-yl]oxy-anthracene-9,10-dione	44339807	C21H20O10	59.0128:[C2H4O2]-H-;89.0232:[C3H6O3]-H-;101.0236:[C4H7O3-H]-H-;125.0244:[C6H6O3]-H-;205.073:[C8H12O6+H]-;284.0316:[C15H9O6]-H-;285.0404:[C15H10O6]-H-	13.936595697717914	59.0128_188.8;89.0232_90.6;101.0236_177.5;125.0244_187.2;205.073_113.5;284.0316_540.0;285.0404_999.0	11	7
113.7326476563779	1.3627	InChI=1S/C21H20O10/c22-6-8-4-10-11(16(25)9-2-1-3-12(24)15(9)17(10)26)5-13(8)30-21-20(29)19(28)18(27)14(7-23)31-21/h1-5,14,18-24,27-29H,6-7H2/t14-,18-,19+,20-,21-/m1/s1	432.106	1-hydroxy-7-(hydroxymethyl)-6-[(2S,3R,4S,5S,6R)-3,4,5-trihydroxy-6-(hydroxymethyl)tetrahydropyran-2-yl]oxy-anthracene-9,10-dione	102438778	C21H20O10	59.0128:[C2H4O2]-H-;89.0232:[C3H6O3]-H-;101.0236:[C4H7O3-H]-H-;125.0244:[C6H6O3]-H-;205.073:[C8H12O6+H]-;284.0316:[C15H9O6]-H-;285.0404:[C15H10O6]-H-	13.936595697717914	59.0128_188.8;89.0232_90.6;101.0236_177.5;125.0244_187.2;205.073_113.5;284.0316_540.0;285.0404_999.0	11	7
113.26429588943316	1.3618	InChI=1S/C21H20O10/c22-8-14-15(25)16(26)17(27)21(29-14)31-19-13(24)6-5-11-12(20(28)30-18(11)19)7-9-1-3-10(23)4-2-9/h1-7,14-17,21-27H,8H2/b12-7+/t14-,15-,16+,17-,21?/m1/s1	432.106	(3E)-6-hydroxy-3-[(4-hydroxyphenyl)methylene]-7-[(3R,4S,5S,6R)-3,4,5-trihydroxy-6-(hydroxymethyl)tetrahydropyran-2-yl]oxy-benzofuran-2-one	44242937	C21H20O10	59.0128:[C2H4O2]-H-;89.0232:[C3H6O3]-H-;101.0236:[C4H7O3-H]-H-;125.0244:[C6H3O3+2H]-;205.073:[C8H11O6+2H]-;284.0316:[C15H9O6]-H-;285.0404:[C15H9O6]-	13.95472539157375	59.0128_188.8;89.0232_90.6;101.0236_177.5;125.0244_187.2;205.073_113.5;284.0316_540.0;285.0404_999.0	11	7
111.92864256546129	1.3483	InChI=1S/C21H20O10/c1-28-10-4-2-9(3-5-10)14-8-13(23)16-12(22)6-11(7-15(16)30-14)29-21-19(26)17(24)18(25)20(27)31-21/h2-8,17-22,24-27H,1H3/t17-,18-,19+,20-,21?/m0/s1	432.106	5-hydroxy-2-(4-methoxyphenyl)-7-[(3R,4S,5S,6S)-3,4,5,6-tetrahydroxytetrahydropyran-2-yl]oxy-chromen-4-one	56603756	C21H20O10	59.0128:[C2H4O2]-H-;89.0232:[C3H6O3]-H-;101.0236:[C4H7O3-H]-H-;125.0244:[C6H3O3+2H]-;205.073:[C8H11O6+2H]-;284.0316:[C15H10O6-H]-H-;285.0404:[C15H10O6]-H-	13.832781087866358	59.0128_188.8;89.0232_90.6;101.0236_177.5;125.0244_187.2;205.073_113.5;284.0316_540.0;285.0404_999.0	11	7
119.90241042647438	1.3468	InChI=1S/C21H20O10/c1-28-16-3-2-11(4-18(16)30-10-20(26)27)17-7-15(25)21-14(24)5-13(6-19(21)31-17)29-9-12(23)8-22/h2-7,12,22-24H,8-10H2,1H3,(H,26,27)	432.106	2-[5-[7-(2,3-dihydroxypropoxy)-5-hydroxy-4-oxo-chromen-2-yl]-2-methoxy-phenoxy]acetic acid	23212603	C21H20O10	59.0128:[C2H3O2]-;89.0232:[C3H7O3-H]-H-;101.0236:[C4H4O3+H]-;125.0244:[C6H3O3+2H]-;284.0316:[C15H9O6]-H-;285.0404:[C15H11O6-H]-H-	13.23523423471606	59.0128_188.8;89.0232_90.6;101.0236_177.5;125.0244_187.2;284.0316_540.0;285.0404_999.0	11	6
114.54107546285363	1.3196	InChI=1S/C21H20O10/c1-28-20-18(26)17(25)19(27)21(31-20)30-11-6-13(23)15-14(7-11)29-8-12(16(15)24)9-2-4-10(22)5-3-9/h2-8,17-23,25-27H,1H3/t17-,18-,19+,20-,21+/m0/s1	432.106	5-hydroxy-3-(4-hydroxyphenyl)-7-[(2R,3R,4S,5S,6S)-3,4,5-trihydroxy-6-methoxy-tetrahydropyran-2-yl]oxy-chromen-4-one	71592077	C21H20O10	59.0128:[C2H4O2]-H-;89.0232:[C3H6O3]-H-;101.0236:[C4H7O3-H]-H-;125.0244:[C6H3O3+2H]-;205.073:[C8H12O6+H]-;284.0316:[C15H9O6]-H-;285.0404:[C15H9O6]-	13.179383962052233	59.0128_188.8;89.0232_90.6;101.0236_177.5;125.0244_187.2;205.073_113.5;284.0316_540.0;285.0404_999.0	11	7
156.02703224605332	1.3152	InChI=1S/C21H20O10/c1-10(30-12(9-23)4-5-22)29-11-2-3-13-18(6-11)31-21(20(28)19(13)27)14-7-16(25)17(26)8-15(14)24/h2-3,6-8,10,12,22-24,28H,4-5,9H2,1H3	432.106	4-hydroxy-5-[3-hydroxy-7-[1-[3-hydroxy-1-(hydroxymethyl)propoxy]ethoxy]-4-oxo-chromen-2-yl]-1,2-benzoquinone	68352008	C21H20O10	59.0128:[C2H4O2]-H-;101.0236:[C4H8O3-2H]-H-;125.0244:[C6H4O3+H]-;284.0316:[C15H7O6+H]-;285.0404:[C15H9O6]-	10.132063661115772	59.0128_188.8;101.0236_177.5;125.0244_187.2;284.0316_540.0;285.0404_999.0	11	5
156.02703224605332	1.3152	InChI=1S/C21H20O10/c1-10(30-12(9-23)4-5-22)29-11-2-3-13-18(6-11)31-21(20(28)19(13)27)14-7-16(25)17(26)8-15(14)24/h2-3,6-7,10,12,22-23,28H,4-5,8-9H2,1H3	432.106	5-[3-hydroxy-7-[1-[3-hydroxy-1-(hydroxymethyl)propoxy]ethoxy]-4-oxo-chromen-2-yl]cyclohex-5-ene-1,2,4-trione	123201546	C21H20O10	59.0128:[C2H4O2]-H-;101.0236:[C4H8O3-2H]-H-;125.0244:[C6H4O3+H]-;284.0316:[C15H7O6+H]-;285.0404:[C15H9O6]-	10.132063661115772	59.0128_188.8;101.0236_177.5;125.0244_187.2;284.0316_540.0;285.0404_999.0	11	5
104.14469304990384	1.2736	InChI=1S/C21H20O10/c1-28-11-6-13(22)15-14(7-11)29-8-12(16(15)23)9-2-4-10(5-3-9)30-21-19(26)17(24)18(25)20(27)31-21/h2-8,17-22,24-27H,1H3	432.106	5-hydroxy-7-methoxy-3-[4-(3,4,5,6-tetrahydroxytetrahydropyran-2-yl)oxyphenyl]chromen-4-one	21240310	C21H20O10	59.0128:[C2H4O2]-H-;89.0232:[C3H6O3]-H-;101.0236:[C4H7O3-H]-H-;125.0244:[C6H3O3+2H]-;284.0316:[C15H10O6-H]-H-;285.0404:[C15H10O6]-H-	13.179383962052233	59.0128_188.8;89.0232_90.6;101.0236_177.5;125.0244_187.2;284.0316_540.0;285.0404_999.0	11	6
103.19068675071073	1.2633	InChI=1S/C21H20O10/c1-27-10-2-4-11(5-3-10)29-15-9-28-14-8-12(6-7-13(14)16(15)22)30-21-19(25)17(23)18(24)20(26)31-21/h2-9,17-21,23-26H,1H3	432.106	3-(4-methoxyphenoxy)-7-(3,4,5,6-tetrahydroxytetrahydropyran-2-yl)oxy-chromen-4-one	21240304	C21H20O10	59.0128:[C2H4O2]-H-;89.0232:[C3H6O3]-H-;101.0236:[C4H7O3-H]-H-;125.0244:[C6H6O3]-H-;284.0316:[C15H10O6-H]-H-;285.0404:[C15H10O6]-H-	13.081503040719443	59.0128_188.8;89.0232_90.6;101.0236_177.5;125.0244_187.2;284.0316_540.0;285.0404_999.0	11	6
136.0571975356023	1.2629	InChI=1S/C21H20O10/c1-6-21(29)11(22)4-10(31-6)13-16(21)20(28)15-14(19(13)27)17(25)8-2-7(3-12(23)24)30-5-9(8)18(15)26/h6-7,10-11,22,25-26,29H,2-5H2,1H3,(H,23,24)/t6?,7-,10?,11?,21?/m1/s1	432.106	NA	68242797	C21H20O10	59.0128:[C2H3O2]-;89.0232:[C3H4O3+H]-;101.0236:[C4H6O3]-H-;125.0244:[C6H6O3]-H-;284.0316:[C15H9O6]-H-;285.0404:[C15H9O6]-	10.716939075838429	59.0128_188.8;89.0232_90.6;101.0236_177.5;125.0244_187.2;284.0316_540.0;285.0404_999.0	11	6
82.96563373268785	1.2266	InChI=1S/C21H20O10/c22-11-6-10(29-21-18(26)16(24)17(25)19(31-21)20(27)28)7-14-15(11)12(23)8-13(30-14)9-4-2-1-3-5-9/h1-7,13,16-19,21-22,24-26H,8H2,(H,27,28)/t13?,16-,17-,18+,19-,21+/m1/s1	432.106	(2R,3R,4R,5S,6R)-3,4,5-trihydroxy-6-(5-hydroxy-4-oxo-2-phenyl-chroman-7-yl)oxy-tetrahydropyran-2-carboxylic acid	73388351	C21H20O10	59.0128:[C2H4O2]-H-;89.0232:[C3H6O3]-H-;101.0236:[C4H5O3]-;125.0244:[C6H3O3+2H]-;191.0196:[C6H9O7-H]-H-;285.0404:[C15H12O6-2H]-H-	13.936281922632581	59.0128_188.8;89.0232_90.6;101.0236_177.5;125.0244_187.2;191.0196_169.7;285.0404_999.0	11	6
108.29456602039224	1.201	InChI=1S/C21H20O10/c1-8(22)30-20-18(28)16(26)17(27)19(31-20)21(29)9-4-2-6-11(23)13(9)15(25)14-10(21)5-3-7-12(14)24/h2-7,16-20,23-24,26-29H,1H3	432.106	[3,4,5-trihydroxy-6-(4,5,9-trihydroxy-10-oxo-9-anthryl)tetrahydropyran-2-yl] acetate	11546508	C21H20O10	59.0128:[C2H3O2]-;89.0232:[C3H6O3]-H-;101.0236:[C4H6O3]-H-;205.073:[C8H11O6+2H]-;284.0316:[C15H11O6-2H]-H-;285.0404:[C15H11O6-H]-H-	11.704980356820352	59.0128_188.8;89.0232_90.6;101.0236_177.5;205.073_113.5;284.0316_540.0;285.0404_999.0	11	6
108.75767842604779	1.1586	InChI=1S/C21H20O10/c22-13-5-1-11(2-6-13)20(12-3-7-14(23)8-4-12)21(29,30)17(24)16-15(31-20)9-18(25,26)10-19(16,27)28/h1-9,16,22-23,25-30H,10H2	432.106	3,3,5,5,7,7-hexahydroxy-2,2-bis(4-hydroxyphenyl)-4a,6-dihydrochromen-4-one	89809554	C21H20O10	59.0128:[C2H4O2]-H-;89.0232:[C3H5O3]-;101.0236:[C4H5O3]-;125.0244:[C6H7O3-H]-H-;191.0196:[C6H9O7-H]-H-;284.0316:[C15H11O6-2H]-H-;285.0404:[C15H11O6-H]-H-	10.983943463135882	59.0128_188.8;89.0232_90.6;101.0236_177.5;125.0244_187.2;191.0196_169.7;284.0316_540.0;285.0404_999.0	11	7
64.85086052270778	1.1519	InChI=1S/C21H20O10/c1-28-17-11(22)7-10-13(15(17)24)18-19(31-21(10)27)16(25)14(23)12(30-18)8-29-20(26)9-5-3-2-4-6-9/h2-7,12,14,16,18-19,22-25H,8H2,1H3/t12-,14-,16+,18+,19-/m1/s1	432.106	[(2R,3S,4S,4aR,10bS)-3,4,8,10-tetrahydroxy-9-methoxy-6-oxo-3,4,4a,10b-tetrahydro-2H-pyrano[3,2-c]isochromen-2-yl]methyl benzoate	56683446	C21H20O10	59.0128:[C2H4O2]-H-;89.0232:[C3H5O3]-;101.0236:[C4H5O3]-;125.0244:[C6H3O3+2H]-;285.0404:[C15H12O6-2H]-H-	14.025918544353145	59.0128_188.8;89.0232_90.6;101.0236_177.5;125.0244_187.2;285.0404_999.0	11	5
138.00270298922254	1.1506	InChI=1S/C21H20O10/c1-8-6-11(23)20(28)21(30-8)16-15(18(26)12(31-21)7-13(24)29-2)17(25)9-4-3-5-10(22)14(9)19(16)27/h3-5,8,12,18,20,22,26,28H,6-7H2,1-2H3/t8-,12+,18-,20-,21-/m1/s1	432.106	methyl 2-[(1R,3S,3''R,4S,6''R)-3'',4,9-trihydroxy-6''-methyl-4'',5,10-trioxo-spiro[3,4-dihydrobenzo[g]isochromene-1,2''-tetrahydropyran]-3-yl]acetate	122388538	C21H20O10	59.0128:[C2H3O2]-;89.0232:[C3H3O3+2H]-;100.9666:[C6O2-2H]-H-;101.0236:[C4H6O3]-H-;125.0244:[C6H7O3-H]-H-;284.0316:[C15H9O6]-H-;285.0404:[C15H9O6]-	8.756077953281316	59.0128_188.8;89.0232_90.6;100.9666_99.2;101.0236_177.5;125.0244_187.2;284.0316_540.0;285.0404_999.0	11	7
138.1420726152226	1.1155	InChI=1S/C21H20O10/c1-10(22)28-17-9-27-21(20(30-12(3)24)19(17)29-11(2)23)31-16-8-15(25)13-6-4-5-7-14(13)18(16)26/h4-8,17,19-21H,9H2,1-3H3/t17-,19+,20-,21+/m1/s1	432.106	[(3R,4S,5R,6S)-4,5-diacetoxy-6-[(1,4-dioxo-2-naphthyl)oxy]tetrahydropyran-3-yl] acetate	59268271	C21H20O10	59.0128:[C2H3O2]-;89.0232:[C3H3O3+2H]-;101.0236:[C4H6O3]-H-;125.0244:[C6H6O3]-H-;205.073:[C8H11O6+2H]-;284.0316:[C15H11O6-2H]-H-;285.0404:[C15H11O6-H]-H-	8.17636390804901	59.0128_188.8;89.0232_90.6;101.0236_177.5;125.0244_187.2;205.073_113.5;284.0316_540.0;285.0404_999.0	11	7
98.90402030567371	1.115	InChI=1S/C21H20O10/c22-11-3-1-10(2-4-11)21(13-6-5-12(23)7-14(13)24)18(26)17(25)16-15(31-21)8-19(27,28)9-20(16,29)30/h1-8,16,18,22-24,26-30H,9H2	432.106	2-(2,4-dihydroxyphenyl)-3,5,5,7,7-pentahydroxy-2-(4-hydroxyphenyl)-4a,6-dihydro-3H-chromen-4-one	21158470	C21H20O10	59.0128:[C2H4O2]-H-;89.0232:[C3H5O3]-;101.0236:[C4H5O3]-;125.0244:[C6H7O3-H]-H-;284.0316:[C15H11O6-2H]-H-;285.0404:[C15H12O6-2H]-H-	10.983943463135882	59.0128_188.8;89.0232_90.6;101.0236_177.5;125.0244_187.2;284.0316_540.0;285.0404_999.0	11	6
114.25730036902553	1.1118	InChI=1S/C21H20O10/c1-2-29-31-21(27)16-8-12-3-4-15(9-17(12)30-20(16)26)28-10-11-5-13(18(22)23)7-14(6-11)19(24)25/h3-9,18-19,22-25H,2,10H2,1H3	432.106	ethyl 7-[[3,5-bis(dihydroxymethyl)phenyl]methoxy]-2-oxo-chromene-3-carboperoxoate	23517688	C21H20O10	59.0128:[C2H5O2-H]-H-;89.0232:[C3H5O3]-;101.0236:[C4H5O3]-;125.0244:[C6H6O3]-H-;284.0316:[C15H10O6-H]-H-;285.0404:[C15H10O6]-H-	9.831052588406822	59.0128_188.8;89.0232_90.6;101.0236_177.5;125.0244_187.2;284.0316_540.0;285.0404_999.0	11	6
108.79766175523045	1.1083	InChI=1S/C21H20O10/c1-24-11-7-9(6-10(22)15(11)25-2)14-18(27-4)13(23)12-16(26-3)20-21(30-8-29-20)19(28-5)17(12)31-14/h6-7,22H,8H2,1-5H3	432.106	6-(3-hydroxy-4,5-dimethoxy-phenyl)-4,7,9-trimethoxy-[1,3]dioxolo[4,5-g]chromen-8-one	44260079	C21H20O10	59.0128:[C2H2O2+H]-;101.0236:[C4H3O3+2H]-;125.0244:[C6H5O3]-;284.0316:[C15H10O6-H]-H-;285.0404:[C15H10O6]-H-	10.165252438930496	59.0128_188.8;101.0236_177.5;125.0244_187.2;284.0316_540.0;285.0404_999.0	11	5
217.68780847128536	1.088	InChI=1S/C23H17FN4O2S/c24-17-9-6-10-18-21(17)16(14-30-15-7-2-1-3-8-15)22(31-18)23(29)25-13-20-27-26-19-11-4-5-12-28(19)20/h1-12H,13-14H2,(H,25,29)	432.106	4-fluoro-3-(phenoxymethyl)-N-([1,2,4]triazolo[4,3-a]pyridin-3-ylmethyl)benzothiophene-2-carboxamide	30701699	C23H17FN4O2S	284.0316:[C16H10FO2S]-H-;285.0404:[C16H10FO2S]-	2.023324001788925	284.0316_540.0;285.0404_999.0	11	2
112.57287971978334	1.0677	InChI=1S/C22H21FO6S/c23-14-3-1-11(2-4-14)5-13-10-30-18-6-12-9-28-22(16(12)7-15(13)18)21(27)20(26)19(25)17(8-24)29-22/h1-4,6-7,10,17,19-21,24-27H,5,8-9H2/t17-,19-,20+,21-,22+/m1/s1	432.104	(3''R,4''S,5S,5''S,6''R)-3-[(4-fluorophenyl)methyl]-6''-(hydroxymethyl)spiro[7H-thieno[3,2-f]isobenzofuran-5,2''-tetrahydropyran]-3'',4'',5''-triol	24831476	C22H21FO6S	59.0128:[C2H4O2]-H-;89.0232:[C3H6O3]-H-;101.0236:[C4H7O3-H]-H-;125.0244:[C6H6O3]-H-;205.073:[C8H12O6+H]-;284.0316:[C16H10FO2S]-H-;285.0404:[C16H10FO2S]-	9.235453469813935	59.0128_188.8;89.0232_90.6;101.0236_177.5;125.0244_187.2;205.073_113.5;284.0316_540.0;285.0404_999.0	11	7
142.07196292392564	1.0531	InChI=1S/C19H28O6Se/c1-12-14(11-20)23-17(26-13-9-7-6-8-10-13)16-15(12)24-18(2,21-4)19(3,22-5)25-16/h6-10,12,14-17,20H,11H2,1-5H3	432.105	(2,3-dimethoxy-2,3,8-trimethyl-5-phenylselanyl-5,7,8,8a-tetrahydro-4aH-pyrano[3,4-b][1,4]dioxin-7-yl)methanol	58627424	C19H28O6Se	59.0128:[C2H4O2]-H-;284.0316:[C13H16O2Se]-;285.0404:[C13H16O2Se+H]-	6.882494757052136	59.0128_188.8;284.0316_540.0;285.0404_999.0	11	3
206.58715084402613	1.0195	InChI=1S/C25H21ClN2OS/c26-20-13-11-19(12-14-20)24-25(21-8-4-5-9-22(21)28-24)30-17-16-27-23(29)15-10-18-6-2-1-3-7-18/h1-15,28H,16-17H2,(H,27,29)	432.106	N-[2-[[2-(4-chlorophenyl)-1H-indol-3-yl]sulfanyl]ethyl]-3-phenyl-prop-2-enamide	4391233	C25H21ClN2OS	284.0316:[C16H13ClNS-H]-H-;285.0404:[C16H13ClNS]-H-	1.7103149295347793	284.0316_540.0;285.0404_999.0	11	2
143.4930009590991	1.0158	InChI=1S/C19H28O6Se/c1-6-13-15-16(25-19(3,22-5)18(2,21-4)24-15)14(20)17(23-13)26-12-10-8-7-9-11-12/h7-11,13-17,20H,6H2,1-5H3	432.105	5-ethyl-2,3-dimethoxy-2,3-dimethyl-7-phenylselanyl-5,7,8,8a-tetrahydro-4aH-pyrano[3,4-b][1,4]dioxin-8-ol	58627426	C19H28O6Se	59.0128:[C2H3O2]-;89.0232:[C3H4O3+H]-;284.0316:[C13H16O2Se]-;285.0404:[C13H16O2Se+H]-	6.175920865091559	59.0128_188.8;89.0232_90.6;284.0316_540.0;285.0404_999.0	11	4
81.99867103646412	1.0034	InChI=1S/C21H20O10/c22-14-15(23)17(18(25)26)30-21(16(14)24)31-20(28)13-9-5-4-8-12(13)19(27)29-10-11-6-2-1-3-7-11/h1-9,14-17,21-24H,10H2,(H,25,26)/t14-,15-,16+,17-,21-/m0/s1	432.106	(2S,3S,4S,5R,6S)-6-(2-benzyloxycarbonylbenzoyl)oxy-3,4,5-trihydroxy-tetrahydropyran-2-carboxylic acid	101724460	C21H20O10	59.0128:[C2H4O2]-H-;89.0232:[C3H6O3]-H-;101.0236:[C4H5O3]-;125.0244:[C6H5O3]-;191.0196:[C6H9O7-H]-H-;285.0404:[C15H12O6-2H]-H-	10.38776958186259	59.0128_188.8;89.0232_90.6;101.0236_177.5;125.0244_187.2;191.0196_169.7;285.0404_999.0	11	6
63.91660770036868	0.9827	InChI=1S/C21H20O10/c1-19-20(26)16-14(30-21(20,27)15(31-19)7-28-19)6-11(23)9-5-13(25)17(29-18(9)16)8-2-3-10(22)12(24)4-8/h2-4,6,13,15,17,22-27H,5,7H2,1H3/t13?,15-,17?,19-,20?,21?/m0/s1	432.106	NA	71665670	C21H20O10	59.0128:[C2H3O2]-;89.0232:[C3H4O3+H]-;101.0236:[C4H6O3]-H-;125.0244:[C6H7O3-H]-H-;285.0404:[C15H12O6-2H]-H-	11.34916647897095	59.0128_188.8;89.0232_90.6;101.0236_177.5;125.0244_187.2;285.0404_999.0	11	5
101.53751872564169	0.9659	InChI=1S/C21H20O10/c1-23-12-6-10(7-13-16(12)29-9-28-13)30-14-8-11(22)15-17(24-2)19(25-3)21(27-5)20(26-4)18(15)31-14/h6-8H,9H2,1-5H3	432.106	5,6,7,8-tetramethoxy-2-[(7-methoxy-1,3-benzodioxol-5-yl)oxy]chromen-4-one	71439555	C21H20O10	59.0128:[C2H2O2+H]-;101.0236:[C4H5O3]-;125.0244:[C6H6O3]-H-;284.0316:[C15H11O6-2H]-H-;285.0404:[C15H12O6-2H]-H-	8.377299340162768	59.0128_188.8;101.0236_177.5;125.0244_187.2;284.0316_540.0;285.0404_999.0	11	5
111.13087371733126	0.9655	InChI=1S/C21H20O10/c1-29-12-7-9(5-11(22)17(12)23)14-15-8(4-10(20(25)26)16(14)21(27)28)6-13(30-2)18(24)19(15)31-3/h4-7,14,16,22-24H,1-3H3,(H,25,26)(H,27,28)/t14-,16-/m1/s1	432.106	(1R,2S)-1-(3,4-dihydroxy-5-methoxy-phenyl)-7-hydroxy-6,8-dimethoxy-1,2-dihydronaphthalene-2,3-dicarboxylic acid	9824099	C21H20O10	59.0128:[C2H2O2+H]-;101.0236:[C4H5O3]-;125.0244:[C6H4O3+H]-;284.0316:[C15H10O6-H]-H-;285.0404:[C15H10O6]-H-	7.681883150728082	59.0128_188.8;101.0236_177.5;125.0244_187.2;284.0316_540.0;285.0404_999.0	11	5
102.84798636638601	0.9512	InChI=1S/C21H20O10/c22-15-11-21(27,20(25)26)12-16(30-17(23)7-5-13-3-1-9-28-13)19(15)31-18(24)8-6-14-4-2-10-29-14/h1-10,15-16,19,22,27H,11-12H2,(H,25,26)/b7-5+,8-6+/t15-,16-,19+,21-/m1/s1	432.106	(1R,3R,4S,5R)-3,4-bis[[(E)-3-(2-furyl)prop-2-enoyl]oxy]-1,5-dihydroxy-cyclohexanecarboxylic acid	25127807	C21H20O10	59.0128:[C2H3O2]-;89.0232:[C3H4O3+H]-;101.0236:[C4H6O3]-H-;125.0244:[C6H7O3-H]-H-;284.0316:[C15H11O6-2H]-H-;285.0404:[C15H11O6-H]-H-	8.044264819250195	59.0128_188.8;89.0232_90.6;101.0236_177.5;125.0244_187.2;284.0316_540.0;285.0404_999.0	11	6
195.24344818355473	0.9433	InChI=1S/C25H21ClN2OS/c26-21-10-4-1-8-19(21)15-27-16-24(20-9-3-6-12-23(20)27)30-17-25(29)28-14-13-18-7-2-5-11-22(18)28/h1-12,16H,13-15,17H2	432.106	2-[1-[(2-chlorophenyl)methyl]indol-3-yl]sulfanyl-1-indolin-1-yl-ethanone	3321754	C25H21ClN2OS	284.0316:[C16H13ClNS-H]-H-;285.0404:[C16H13ClNS]-H-	1.2885379919570576	284.0316_540.0;285.0404_999.0	11	2
195.24344818355473	0.9433	InChI=1S/C25H21ClN2OS/c26-20-11-9-18(10-12-20)15-27-16-24(21-6-2-4-8-23(21)27)30-17-25(29)28-14-13-19-5-1-3-7-22(19)28/h1-12,16H,13-15,17H2	432.106	2-[1-[(4-chlorophenyl)methyl]indol-3-yl]sulfanyl-1-indolin-1-yl-ethanone	5050089	C25H21ClN2OS	284.0316:[C16H13ClNS-H]-H-;285.0404:[C16H13ClNS]-H-	1.2885379919570576	284.0316_540.0;285.0404_999.0	11	2
156.3138961089482	0.9382	InChI=1S/C21H20O10/c1-4-26-20(24)28-16-11-7-5-9-14(16)18(22)30-31-19(23)15-10-6-8-12-17(15)29-21(25)27-13(2)3/h5-13H,4H2,1-3H3	432.106	(2-isopropoxycarbonyloxybenzoyl) 2-ethoxycarbonyloxybenzenecarboperoxoate	53244628	C21H20O10	59.0128:[C2H2O2+H]-;89.0232:[C3H5O3]-;101.0236:[C4H7O3-H]-H-;125.0244:[C6H7O3-H]-H-;284.0316:[C15H8O6]-;285.0404:[C15H8O6+H]-	3.9978299410251363	59.0128_188.8;89.0232_90.6;101.0236_177.5;125.0244_187.2;284.0316_540.0;285.0404_999.0	11	6
101.71582652935699	0.9381	InChI=1S/C21H20O10/c1-9(2)31-21(24)11-6-13(26-4)17-19(30-8-28-17)15(11)14-10(20(22)23)5-12(25-3)16-18(14)29-7-27-16/h5-6,9H,7-8H2,1-4H3,(H,22,23)	432.106	4-(5-isopropoxycarbonyl-7-methoxy-1,3-benzodioxol-4-yl)-7-methoxy-1,3-benzodioxole-5-carboxylic acid	101080110	C21H20O10	59.0128:[C2H2O2+H]-;101.0236:[C4H5O3]-;125.0244:[C6H6O3]-H-;284.0316:[C15H11O6-2H]-H-;285.0404:[C15H12O6-2H]-H-	7.914008110964848	59.0128_188.8;101.0236_177.5;125.0244_187.2;284.0316_540.0;285.0404_999.0	11	5
107.19586751013962	0.912	InChI=1S/C21H20O10/c1-9(22)29-12-7-11(25-3)8-13-14(12)16(24)15-17(30-10(2)23)19(26-4)21(28-6)20(27-5)18(15)31-13/h7-8H,1-6H3	432.106	(8-acetoxy-3,5,6,7-tetramethoxy-9-oxo-xanthen-1-yl) acetate	71326106	C21H20O10	59.0128:[C2H3O2]-;101.0236:[C4H3O3+2H]-;125.0244:[C6H7O3-H]-H-;284.0316:[C15H11O6-2H]-H-;285.0404:[C15H11O6-H]-H-	7.096981863881362	59.0128_188.8;101.0236_177.5;125.0244_187.2;284.0316_540.0;285.0404_999.0	11	5
107.19586751013962	0.912	InChI=1S/C21H20O10/c1-9(22)29-12-7-11(25-3)8-13-14(12)16(24)15-17(26-4)19(27-5)21(30-10(2)23)20(28-6)18(15)31-13/h7-8H,1-6H3	432.106	(6-acetoxy-3,5,7,8-tetramethoxy-9-oxo-xanthen-1-yl) acetate	71326107	C21H20O10	59.0128:[C2H3O2]-;101.0236:[C4H3O3+2H]-;125.0244:[C6H7O3-H]-H-;284.0316:[C15H11O6-2H]-H-;285.0404:[C15H11O6-H]-H-	7.096981863881362	59.0128_188.8;101.0236_177.5;125.0244_187.2;284.0316_540.0;285.0404_999.0	11	5
73.06217640404161	0.8731	InChI=1S/C21H20O10/c1-28-10-3-4-13(16(7-10)29-2)17(20-18(26)14(24)5-11(8-22)30-20)21-19(27)15(25)6-12(9-23)31-21/h3-7,17,22-23,26-27H,8-9H2,1-2H3	432.106	2-[(2,4-dimethoxyphenyl)-[3-hydroxy-6-(hydroxymethyl)-4-oxo-pyran-2-yl]methyl]-3-hydroxy-6-(hydroxymethyl)pyran-4-one	71754772	C21H20O10	59.0128:[C2H3O2]-;101.0236:[C4H4O3+H]-;125.0244:[C6H4O3+H]-;285.0404:[C15H12O6-2H]-H-	8.916069741194926	59.0128_188.8;101.0236_177.5;125.0244_187.2;285.0404_999.0	11	4
73.06217640404161	0.8731	InChI=1S/C21H20O10/c1-28-15-5-3-4-12(19(15)29-2)16(20-17(26)13(24)6-10(8-22)30-20)21-18(27)14(25)7-11(9-23)31-21/h3-7,16,22-23,26-27H,8-9H2,1-2H3	432.106	2-[(2,3-dimethoxyphenyl)-[3-hydroxy-6-(hydroxymethyl)-4-oxo-pyran-2-yl]methyl]-3-hydroxy-6-(hydroxymethyl)pyran-4-one	71826957	C21H20O10	59.0128:[C2H3O2]-;101.0236:[C4H4O3+H]-;125.0244:[C6H4O3+H]-;285.0404:[C15H12O6-2H]-H-	8.916069741194926	59.0128_188.8;101.0236_177.5;125.0244_187.2;285.0404_999.0	11	4
73.06217640404161	0.8731	InChI=1S/C21H20O10/c1-28-15-4-3-10(5-16(15)29-2)17(20-18(26)13(24)6-11(8-22)30-20)21-19(27)14(25)7-12(9-23)31-21/h3-7,17,22-23,26-27H,8-9H2,1-2H3	432.106	2-[(3,4-dimethoxyphenyl)-[3-hydroxy-6-(hydroxymethyl)-4-oxo-pyran-2-yl]methyl]-3-hydroxy-6-(hydroxymethyl)pyran-4-one	4638554	C21H20O10	59.0128:[C2H3O2]-;101.0236:[C4H4O3+H]-;125.0244:[C6H4O3+H]-;285.0404:[C15H12O6-2H]-H-	8.916069741194926	59.0128_188.8;101.0236_177.5;125.0244_187.2;285.0404_999.0	11	4
73.06217640404161	0.8731	InChI=1S/C21H20O10/c1-28-10-3-4-16(29-2)13(5-10)17(20-18(26)14(24)6-11(8-22)30-20)21-19(27)15(25)7-12(9-23)31-21/h3-7,17,22-23,26-27H,8-9H2,1-2H3	432.106	2-[(2,5-dimethoxyphenyl)-[3-hydroxy-6-(hydroxymethyl)-4-oxo-pyran-2-yl]methyl]-3-hydroxy-6-(hydroxymethyl)pyran-4-one	71827158	C21H20O10	59.0128:[C2H3O2]-;101.0236:[C4H4O3+H]-;125.0244:[C6H4O3+H]-;285.0404:[C15H12O6-2H]-H-	8.916069741194926	59.0128_188.8;101.0236_177.5;125.0244_187.2;285.0404_999.0	11	4
73.06217640404161	0.8731	InChI=1S/C21H20O10/c1-28-11-3-10(4-12(5-11)29-2)17(20-18(26)15(24)6-13(8-22)30-20)21-19(27)16(25)7-14(9-23)31-21/h3-7,17,22-23,26-27H,8-9H2,1-2H3	432.106	2-[(3,5-dimethoxyphenyl)-[3-hydroxy-6-(hydroxymethyl)-4-oxo-pyran-2-yl]methyl]-3-hydroxy-6-(hydroxymethyl)pyran-4-one	71825754	C21H20O10	59.0128:[C2H3O2]-;101.0236:[C4H4O3+H]-;125.0244:[C6H4O3+H]-;285.0404:[C15H12O6-2H]-H-	8.916069741194926	59.0128_188.8;101.0236_177.5;125.0244_187.2;285.0404_999.0	11	4
69.54526939094771	0.869	InChI=1S/C21H20O10/c1-4-5-11-6-10-7-14(24)20(3,18(27)21(10,29)19(28)30-11)31-17(26)15-9(2)16(25)13(23)8-12(15)22/h4-8,19,22-23,25,28-29H,1-3H3/b5-4+/t19-,20+,21+/m0/s1	432.106	[(1S,7R,8aS)-1,8a-dihydroxy-7-methyl-6,8-dioxo-3-[(E)-prop-1-enyl]-1H-isochromen-7-yl] 3,4,6-trihydroxy-2-methyl-benzoate	54672324	C21H20O10	59.0128:[C2H3O2]-;89.0232:[C3H3O3+2H]-;101.0236:[C4H3O3+2H]-;125.0244:[C6H4O3+H]-;285.0404:[C15H12O6-2H]-H-	9.100542893391793	59.0128_188.8;89.0232_90.6;101.0236_177.5;125.0244_187.2;285.0404_999.0	11	5
71.8486089294062	0.8648	InChI=1S/C21H20O10/c1-7(23)12-11(25)5-9-16(26)15-14(19(29)21(9,31)18(12)28)17(27)13-8(20(15,30)6-22)3-2-4-10(13)24/h2-4,9,12,14-16,22,24,26,30-31H,5-6H2,1H3/t9-,12?,14?,15-,16-,20?,21-/m1/s1	432.106	(4aR,5R,5aR,12aS)-2-acetyl-5,6,10,12a-tetrahydroxy-6-(hydroxymethyl)-4a,5,5a,11a-tetrahydro-4H-tetracene-1,3,11,12-tetrone	90990915	C21H20O10	59.0128:[C2H4O2]-H-;101.0236:[C4H7O3-H]-H-;125.0244:[C6H6O3]-H-;285.0404:[C15H12O6-2H]-H-	8.86726556422529	59.0128_188.8;101.0236_177.5;125.0244_187.2;285.0404_999.0	11	4
156.8009207889981	0.8152	InChI=1S/C25H21ClN2OS/c26-21-9-6-17(7-10-21)15-23-24(19-4-2-1-3-5-19)28-25(30-23)27-16-18-8-11-22-20(14-18)12-13-29-22/h1-11,14H,12-13,15-16H2,(H,27,28)	432.106	5-[(4-chlorophenyl)methyl]-N-(2,3-dihydrobenzofuran-5-ylmethyl)-4-phenyl-thiazol-2-amine	72706620	C25H21ClN2OS	284.0316:[C16H12ClNS]-H-;285.0404:[C16H12ClNS]-	1.9680859797953016	284.0316_540.0;285.0404_999.0	11	2
156.8009207889981	0.8152	InChI=1S/C25H21ClN2OS/c26-21-9-5-4-8-19(21)15-23-24(18-6-2-1-3-7-18)28-25(30-23)27-16-17-10-11-22-20(14-17)12-13-29-22/h1-11,14H,12-13,15-16H2,(H,27,28)	432.106	5-[(2-chlorophenyl)methyl]-N-(2,3-dihydrobenzofuran-5-ylmethyl)-4-phenyl-thiazol-2-amine	72706552	C25H21ClN2OS	284.0316:[C16H12ClNS]-H-;285.0404:[C16H12ClNS]-	1.9680859797953016	284.0316_540.0;285.0404_999.0	11	2
129.90163848554602	0.8037	InChI=1S/C19H19F3O8/c1-16(2)13(25)17(9-12(23)24,30-14(16)26)10-29-15(27)18(28-3,19(20,21)22)11-7-5-4-6-8-11/h4-8H,9-10H2,1-3H3,(H,23,24)/t17-,18+/m1/s1	432.103	2-[(2R)-4,4-dimethyl-3,5-dioxo-2-[[(2S)-3,3,3-trifluoro-2-methoxy-2-phenyl-propanoyl]oxymethyl]tetrahydrofuran-2-yl]acetic acid	10836466	C19H19F3O8	59.0128:[C2H3O2]-;89.0232:[C3H3O3+2H]-;101.0236:[C4H5O3]-;125.0244:[C6H6O3]-H-;284.0316:[C13H10F3O4-2H]-H-;285.0404:[C13H10F3O4-H]-H-	3.7124101938892724	59.0128_188.8;89.0232_90.6;101.0236_177.5;125.0244_187.2;284.0316_540.0;285.0404_999.0	11	6
121.78189665851585	0.8025	InChI=1S/C22H21FO6S/c1-3-19(24)28-13-11-26-10-12-27-14(2)29-17-9-8-16(23)20-21(25)15-6-4-5-7-18(15)30-22(17)20/h3-9,14H,1,10-13H2,2H3	432.104	2-[2-[1-(1-fluoro-9-oxo-thioxanthen-4-yl)oxyethoxy]ethoxy]ethyl prop-2-enoate	67472847	C22H21FO6S	59.0128:[C2H4O2]-H-;89.0232:[C3H4O3+H]-;101.0236:[C4H6O3]-H-;284.0316:[C16H12FO2S-2H]-H-;285.0404:[C16H12FO2S-H]-H-	4.275411502164754	59.0128_188.8;89.0232_90.6;101.0236_177.5;284.0316_540.0;285.0404_999.0	11	5
124.20107474199378	0.768	InChI=1S/C21H20O10/c1-26-16-14(30-20(24)18(16)28-3)9-5-7-12(22)11-13(23)8-6-10-15-17(27-2)19(29-4)21(25)31-15/h5-10H,11H2,1-4H3/b7-5+,8-6+,14-9-,15-10+	432.106	(1Z,2E,7E,9E)-1,9-bis(3,4-dimethoxy-5-oxo-2-furylidene)nona-2,7-diene-4,6-dione	71522222	C21H20O10	101.0236:[C4H3O3+2H]-;125.0244:[C6H4O3+H]-;284.0316:[C15H11O6-2H]-H-;285.0404:[C15H11O6-H]-H-	3.5422735567024644	101.0236_177.5;125.0244_187.2;284.0316_540.0;285.0404_999.0	11	4
124.20107474199378	0.7672	InChI=1S/C21H20O10/c1-26-16-14(30-20(24)18(16)28-3)9-5-7-12(22)11-13(23)8-6-10-15-17(27-2)19(29-4)21(25)31-15/h5-11,22H,1-4H3/b7-5+,8-6+,12-11-,14-9-,15-10-	432.106	(5Z)-5-[(2E,4Z,7E,9Z)-9-(3,4-dimethoxy-5-oxo-2-furylidene)-4-hydroxy-6-oxo-nona-2,4,7-trienylidene]-3,4-dimethoxy-furan-2-one	122376491	C21H20O10	101.0236:[C4H3O3+2H]-;125.0244:[C6H4O3+H]-;284.0316:[C15H11O6-2H]-H-;285.0404:[C15H11O6-H]-H-	3.529889458515078	101.0236_177.5;125.0244_187.2;284.0316_540.0;285.0404_999.0	11	4
146.5343359574665	0.7497	InChI=1S/C25H21ClN2OS/c26-17-9-10-24-21(13-17)20(19-6-2-4-8-23(19)30-24)14-25(29)27-12-11-16-15-28-22-7-3-1-5-18(16)22/h1-10,13,15,20,28H,11-12,14H2,(H,27,29)/t20-/m0/s1	432.106	2-[(9S)-2-chloro-9H-thioxanthen-9-yl]-N-[2-(1H-indol-3-yl)ethyl]acetamide	28947039	C25H21ClN2OS	284.0316:[C16H12ClNS]-H-;285.0404:[C16H12ClNS]-	1.643459971969061	284.0316_540.0;285.0404_999.0	11	2
67.44731123942879	0.7474	InChI=1S/C21H20O10/c1-5-27-21(23)11-7-13(25-3)17-19(31-9-29-17)15(11)14-10(20(22)26-4)6-12(24-2)16-18(14)30-8-28-16/h6-7H,5,8-9H2,1-4H3	432.106	methyl 4-(5-ethoxycarbonyl-7-methoxy-1,3-benzodioxol-4-yl)-7-methoxy-1,3-benzodioxole-5-carboxylate	101080117	C21H20O10	59.0128:[C2H3O2]-;101.0236:[C4H5O3]-;125.0244:[C6H6O3]-H-;285.0404:[C15H12O6-2H]-H-	7.279350162590306	59.0128_188.8;101.0236_177.5;125.0244_187.2;285.0404_999.0	11	4
120.77497333872658	0.7366	InChI=1S/C19H20ClF3N2O4/c1-11-9-25-17(10-24-11)18(27,19(21,22)23)12(2)15-5-4-14(8-16(15)20)29-7-6-28-13(3)26/h4-5,8-10,12,27H,6-7H2,1-3H3	432.106	2-[3-chloro-4-[3,3,3-trifluoro-2-hydroxy-1-methyl-2-(5-methylpyrazin-2-yl)propyl]phenoxy]ethyl acetate	57421233	C19H20ClF3N2O4	59.0128:[C2H3O2]-;89.0232:[C3H4O3+H]-;101.0236:[C4H7O3-H]-H-;125.0244:[C6H6O3]-H-;205.073:[C9H10F3NO]-;284.0316:[C13H11ClF3N2-2H]-H-;285.0404:[C13H11ClF3N2-H]-H-	3.2787752558245677	59.0128_188.8;89.0232_90.6;101.0236_177.5;125.0244_187.2;205.073_113.5;284.0316_540.0;285.0404_999.0	11	7
122.79068511650212	0.7349	InChI=1S/C17H17ClN8O4/c18-9-3-1-8(2-4-9)5-20-14-11-15(23-17(22-14)24-25-19)26(7-21-11)16-13(29)12(28)10(6-27)30-16/h1-4,7,10,12-13,16,27-29H,5-6H2,(H,20,22,23)/t10-,12+,13+,16-/m1/s1	432.106	(2R,3S,4R,5R)-2-[2-azido-6-[(4-chlorophenyl)methylamino]purin-9-yl]-5-(hydroxymethyl)tetrahydrofuran-3,4-diol	91282799	C17H17ClN8O4	59.0128:[C2H4O2]-H-;89.0232:[C3H6O3]-H-;101.0236:[C4H6O3]-H-;284.0316:[C11H7ClN8-H]-H-;285.0404:[C13H9ClN5O]-H-	3.1062644545987332	59.0128_188.8;89.0232_90.6;101.0236_177.5;284.0316_540.0;285.0404_999.0	11	5
140.16119666762341	0.7127	InChI=1S/C25H21ClN2OS/c1-30-23-13-9-20(10-14-23)25-21(15-18-7-11-22(26)12-8-18)16-24(29)28(27-25)17-19-5-3-2-4-6-19/h2-14,16H,15,17H2,1H3	432.106	2-benzyl-5-[(4-chlorophenyl)methyl]-6-(4-methylsulfanylphenyl)pyridazin-3-one	68848500	C25H21ClN2OS	284.0316:[C16H11ClNS]-;285.0404:[C16H13ClNS]-H-	1.501141531859703	284.0316_540.0;285.0404_999.0	11	2
111.65817862795399	0.6987	InChI=1S/C20H15F3N4O4/c21-20(22,23)13-9-11(10-30-19(29)27-18(24)25)5-8-16(13)31-17(28)15-7-6-12-3-1-2-4-14(12)26-15/h1-9H,10H2,(H4,24,25,27,29)	432.105	[4-(diaminomethylenecarbamoyloxymethyl)-2-(trifluoromethyl)phenyl] quinoline-2-carboxylate	18920505	C20H15F3N4O4	59.0128:[C2H3O2]-;101.0236:[C2H4N3O2]-H-;191.0196:[C7H5F3NO2]-H-;284.0316:[C13H8F3O4]-H-;285.0404:[C13H8F3O4]-	3.3182814015313347	59.0128_188.8;101.0236_177.5;191.0196_169.7;284.0316_540.0;285.0404_999.0	11	5
72.94217516710704	0.6973	InChI=1S/C21H20O10/c1-28-14-6-12(23)18-15-8(14)4-9(20(27)29-2)16(19(25)26)17(15)10-5-11(22)13(24)7-21(10,30-3)31-18/h4-7,15-16,18,22-24H,1-3H3,(H,25,26)	432.106	NA	54676881	C21H20O10	59.0128:[C2H3O2]-;101.0236:[C4H5O3]-;125.0244:[C6H5O3]-;285.0404:[C15H12O6-2H]-H-	6.073250573731654	59.0128_188.8;101.0236_177.5;125.0244_187.2;285.0404_999.0	11	4
130.4173393415141	0.6777	InChI=1S/C22H21FO6S/c1-28-20(24)22(21(25)29-2)11-10-15(13-22)18-9-8-17(30(3,26)27)12-19(18)14-4-6-16(23)7-5-14/h4-10,12H,11,13H2,1-3H3	432.104	dimethyl 3-[2-(4-fluorophenyl)-4-methylsulfonyl-phenyl]cyclopent-3-ene-1,1-dicarboxylate	23203748	C22H21FO6S	59.0128:[C2H3O2]-;101.0236:[C4H3O3+2H]-;125.0244:[C6H7O3-H]-H-;284.0316:[C16H12FO2S-2H]-H-;285.0404:[C16H12FO2S-H]-H-	1.632575085186707	59.0128_188.8;101.0236_177.5;125.0244_187.2;284.0316_540.0;285.0404_999.0	11	5
130.4173393415141	0.6777	InChI=1S/C22H21FO6S/c1-28-20(24)22(21(25)29-2)12-18(14-4-8-16(23)9-5-14)19(13-22)15-6-10-17(11-7-15)30(3,26)27/h4-11H,12-13H2,1-3H3	432.104	dimethyl 3-(4-fluorophenyl)-4-(4-methylsulfonylphenyl)cyclopent-3-ene-1,1-dicarboxylate	10342760	C22H21FO6S	59.0128:[C2H3O2]-;101.0236:[C4H3O3+2H]-;125.0244:[C6H7O3-H]-H-;284.0316:[C16H12FO2S-2H]-H-;285.0404:[C16H12FO2S-H]-H-	1.632575085186707	59.0128_188.8;101.0236_177.5;125.0244_187.2;284.0316_540.0;285.0404_999.0	11	5
130.4173393415141	0.6777	InChI=1S/C22H21FO6S/c1-28-20(24)22(21(25)29-2)11-10-16(13-22)15-6-9-19(30(3,26)27)18(12-15)14-4-7-17(23)8-5-14/h4-10,12H,11,13H2,1-3H3	432.104	dimethyl 3-[3-(4-fluorophenyl)-4-methylsulfonyl-phenyl]cyclopent-3-ene-1,1-dicarboxylate	67705733	C22H21FO6S	59.0128:[C2H3O2]-;101.0236:[C4H3O3+2H]-;125.0244:[C6H7O3-H]-H-;284.0316:[C16H12FO2S-2H]-H-;285.0404:[C16H12FO2S-H]-H-	1.632575085186707	59.0128_188.8;101.0236_177.5;125.0244_187.2;284.0316_540.0;285.0404_999.0	11	5
129.56622769386848	0.6756	InChI=1S/C22H21FO6S/c1-28-20(24)22(21(25)29-2)13-16(12-19(22)15-4-8-17(23)9-5-15)14-6-10-18(11-7-14)30(3,26)27/h4-12,19H,13H2,1-3H3	432.104	dimethyl 2-(4-fluorophenyl)-4-(4-methylsulfonylphenyl)cyclopent-3-ene-1,1-dicarboxylate	22907685	C22H21FO6S	59.0128:[C2H3O2]-;101.0236:[C4H3O3+2H]-;125.0244:[C6H8O3-2H]-H-;284.0316:[C16H12FO2S-2H]-H-;285.0404:[C16H12FO2S-H]-H-	1.6594509138971336	59.0128_188.8;101.0236_177.5;125.0244_187.2;284.0316_540.0;285.0404_999.0	11	5
53.34489995924826	0.6641	InChI=1S/C25H20O5S/c1-15(25(28)29)14-30-19-12-8-16(9-13-19)23(27)22-20-4-2-3-5-21(20)31-24(22)17-6-10-18(26)11-7-17/h2-13,15,26H,14H2,1H3,(H,28,29)	432.103	3-[4-[2-(4-hydroxyphenyl)benzothiophene-3-carbonyl]phenoxy]-2-methyl-propanoic acid	20726862	C25H20O5S	59.0128:[C2H2O2+H]-;89.0232:[C3H4O3+H]-;101.0236:[C4H7O3-H]-H-;125.0244:[C6H6O3]-H-;284.0316:[C19H11OS-2H]-H-	6.9415210827282285	59.0128_188.8;89.0232_90.6;101.0236_177.5;125.0244_187.2;284.0316_540.0	11	5
25.77885223980485	0.6551	InChI=1S/C21H20O10/c1-11-8-12(2-5-14(11)22)4-7-17(25)31-18(19(26)27)21(30,20(28)29)10-13-3-6-15(23)16(24)9-13/h2-9,18,22-24,30H,10H2,1H3,(H,26,27)(H,28,29)/b7-4+/t18-,21-/m1/s1	432.106	(2R,3S)-2-[(3,4-dihydroxyphenyl)methyl]-2-hydroxy-3-[(E)-3-(4-hydroxy-3-methyl-phenyl)prop-2-enoyl]oxy-butanedioic acid	53491684	C21H20O10	59.0128:[C2H2O2+H]-;89.0232:[C3H4O3+H]-;101.0236:[C4H4O3+H]-;125.0244:[C6H6O3]-H-;191.0196:[C6H6O7+H]-	8.773230563952202	59.0128_188.8;89.0232_90.6;101.0236_177.5;125.0244_187.2;191.0196_169.7	11	5
115.07322716423306	0.6496	InChI=1S/C15H29O8PS2/c1-10-6-11(12(16)14-13(10)22-15(2,3)23-14)7-25(18,19)9-26(20,21)8-24(4,5)17/h10-14,16H,6-9H2,1-5H3	432.104	5-(dimethylphosphorylmethylsulfonylmethylsulfonylmethyl)-2,2,7-trimethyl-3a,4,5,6,7,7a-hexahydro-1,3-benzodioxol-4-ol	23534162	C15H29O8PS2	59.0128:[C2H3O2]-;89.0232:[C3H4O3+H]-;284.0316:[C9H19O4PS2-H]-H-;285.0404:[C9H19O4PS2]-H-	2.2780585001502756	59.0128_188.8;89.0232_90.6;284.0316_540.0;285.0404_999.0	11	4
114.24644392572219	0.6323	InChI=1S/C19H20ClF3N2O4/c1-10(24-12-8-15(27-2)17(29-4)16(9-12)28-3)18(26)25-14-6-5-11(20)7-13(14)19(21,22)23/h5-10,24H,1-4H3,(H,25,26)/t10-/m1/s1	432.106	(2R)-N-[4-chloro-2-(trifluoromethyl)phenyl]-2-(3,4,5-trimethoxyanilino)propanamide	94057062	C19H20ClF3N2O4	125.0244:[C6H7O3-H]-H-;205.073:[C11H14NO3-2H]-H-;284.0316:[C13H10ClF3N2-H]-H-;285.0404:[C13H10ClF3N2]-H-	2.0567359776085556	125.0244_187.2;205.073_113.5;284.0316_540.0;285.0404_999.0	11	4
114.2908659421561	0.6278	InChI=1S/C17H17ClN8O4/c1-10-20-5-11(17(19)22-10)7-25-8-12(23-24-25)6-21-16(27)9-30-15-3-2-13(26(28)29)4-14(15)18/h2-5,8H,6-7,9H2,1H3,(H,21,27)(H2,19,20,22)	432.106	N-[[1-[(4-amino-2-methyl-pyrimidin-5-yl)methyl]triazol-4-yl]methyl]-2-(2-chloro-4-nitro-phenoxy)acetamide	90276812	C17H17ClN8O4	59.0128:[C2H3O2]-;100.9666:[C3HClNO]-H-;125.0244:[C4H5N3O2-H]-H-;205.073:[C9H10N4O2]-H-;284.0316:[C10H8ClN4O4+H]-;285.0404:[C10H8ClN4O4+2H]-	1.9801883759179275	59.0128_188.8;100.9666_99.2;125.0244_187.2;205.073_113.5;284.0316_540.0;285.0404_999.0	11	6
25.77885223980485	0.6275	InChI=1S/C21H20O10/c1-30-16-10-13(4-8-15(16)23)11-21(29,20(27)28)18(19(25)26)31-17(24)9-5-12-2-6-14(22)7-3-12/h2-10,18,22-23,29H,11H2,1H3,(H,25,26)(H,27,28)/b9-5+	432.106	2-hydroxy-2-[(4-hydroxy-3-methoxy-phenyl)methyl]-3-[(E)-3-(4-hydroxyphenyl)prop-2-enoyl]oxy-butanedioic acid	92002699	C21H20O10	59.0128:[C2H2O2+H]-;89.0232:[C3H4O3+H]-;101.0236:[C4H4O3+H]-;125.0244:[C6H6O3]-H-;191.0196:[C6H6O7+H]-	8.32546875370742	59.0128_188.8;89.0232_90.6;101.0236_177.5;125.0244_187.2;191.0196_169.7	11	5
25.77885223980485	0.6275	InChI=1S/C21H20O10/c1-30-16-10-12(4-8-15(16)23)5-9-17(24)31-18(19(25)26)21(29,20(27)28)11-13-2-6-14(22)7-3-13/h2-10,18,22-23,29H,11H2,1H3,(H,25,26)(H,27,28)/b9-5+/t18-,21-/m1/s1	432.106	(2R,3S)-2-hydroxy-3-[(E)-3-(4-hydroxy-3-methoxy-phenyl)prop-2-enoyl]oxy-2-[(4-hydroxyphenyl)methyl]butanedioic acid	10002902	C21H20O10	59.0128:[C2H2O2+H]-;89.0232:[C3H4O3+H]-;101.0236:[C4H4O3+H]-;125.0244:[C6H6O3]-H-;191.0196:[C6H6O7+H]-	8.32546875370742	59.0128_188.8;89.0232_90.6;101.0236_177.5;125.0244_187.2;191.0196_169.7	11	5
25.77885223980485	0.6275	InChI=1S/C21H20O10/c1-30-16-8-4-12(10-15(16)23)5-9-17(24)31-18(19(25)26)21(29,20(27)28)11-13-2-6-14(22)7-3-13/h2-10,18,22-23,29H,11H2,1H3,(H,25,26)(H,27,28)/b9-5+/t18-,21-/m1/s1	432.106	(2R,3S)-2-hydroxy-3-[(E)-3-(3-hydroxy-4-methoxy-phenyl)prop-2-enoyl]oxy-2-[(4-hydroxyphenyl)methyl]butanedioic acid	6450179	C21H20O10	59.0128:[C2H2O2+H]-;89.0232:[C3H4O3+H]-;101.0236:[C4H4O3+H]-;125.0244:[C6H6O3]-H-;191.0196:[C6H6O7+H]-	8.32546875370742	59.0128_188.8;89.0232_90.6;101.0236_177.5;125.0244_187.2;191.0196_169.7	11	5
109.2767371995955	0.6274	InChI=1S/C19H20ClF3N2O4/c1-28-16-8-13(15(20)9-17(16)29-7-6-26)11-25-18(27)24-10-12-2-4-14(5-3-12)19(21,22)23/h2-5,8-9,26H,6-7,10-11H2,1H3,(H2,24,25,27)	432.106	1-[[2-chloro-4-(2-hydroxyethoxy)-5-methoxy-phenyl]methyl]-3-[[4-(trifluoromethyl)phenyl]methyl]urea	24990058	C19H20ClF3N2O4	59.0128:[C2H5O2-H]-H-;101.0236:[C4H5O3]-;125.0244:[C6H7O3-H]-H-;284.0316:[C13H10ClF3N2-H]-H-;285.0404:[C13H10ClF3N2]-H-	2.3339699645202856	59.0128_188.8;101.0236_177.5;125.0244_187.2;284.0316_540.0;285.0404_999.0	11	5
25.694024111126403	0.6271	InChI=1S/C21H20O10/c1-30-16-10-12(4-7-15(16)23)8-9-31-19(26)17(18(24)25)21(29,20(27)28)11-13-2-5-14(22)6-3-13/h2-10,17,22-23,29H,11H2,1H3,(H,24,25)(H,27,28)/b9-8+/t17-,21-/m1/s1	432.106	(2R,3R)-2-hydroxy-3-[(E)-2-(4-hydroxy-3-methoxy-phenyl)vinyloxy]carbonyl-2-[(4-hydroxyphenyl)methyl]butanedioic acid	10455487	C21H20O10	59.0128:[C2H2O2+H]-;89.0232:[C3H4O3+H]-;101.0236:[C4H4O3+H]-;125.0244:[C6H6O3]-H-;191.0196:[C6H6O7+H]-	8.32546875370742	59.0128_188.8;89.0232_90.6;101.0236_177.5;125.0244_187.2;191.0196_169.7	11	5
123.69255879248585	0.6264	InChI=1S/C25H21ClN2OS/c1-16-7-10-21(11-8-16)27-25-28(3)24(29)23(30-25)15-18-5-4-6-19(14-18)22-12-9-20(26)13-17(22)2/h4-15H,1-3H3	432.106	5-[[3-(4-chloro-2-methyl-phenyl)phenyl]methylene]-3-methyl-2-(p-tolylimino)thiazolidin-4-one	123631854	C25H21ClN2OS	284.0316:[C16H11ClNS]-;285.0404:[C16H11ClNS+H]-	1.282694492310318	284.0316_540.0;285.0404_999.0	11	2
116.09356601850823	0.6237	InChI=1S/C25H21ClN2OS/c1-16(29)24(18-7-3-2-4-8-18)30-25-21(15-27)23(17-11-13-19(26)14-12-17)20-9-5-6-10-22(20)28-25/h2-4,7-8,11-14,24,29H,1,5-6,9-10H2	432.106	4-(4-chlorophenyl)-2-(2-hydroxy-1-phenyl-allyl)sulfanyl-5,6,7,8-tetrahydroquinoline-3-carbonitrile	117747184	C25H21ClN2OS	284.0316:[C16H12ClNS]-H-;285.0404:[C16H12ClNS]-	1.784857217038374	284.0316_540.0;285.0404_999.0	11	2
121.30067304438089	0.6218	InChI=1S/C25H21ClN2OS/c1-17-6-8-19(9-7-17)15-23-24(29)28(22-5-3-4-18(2)14-22)25(27-23)30-16-20-10-12-21(26)13-11-20/h3-15H,16H2,1-2H3	432.106	2-[(4-chlorophenyl)methylsulfanyl]-3-(m-tolyl)-5-(p-tolylmethylene)imidazol-4-one	72067056	C25H21ClN2OS	284.0316:[C16H11ClNS]-;285.0404:[C16H11ClNS+H]-	1.3791166901713938	284.0316_540.0;285.0404_999.0	11	2
113.24813795934088	0.6126	InChI=1S/C25H21ClN2OS/c1-3-29-25-20-11-7-6-10-19(20)23(15-27-25)28-17-12-13-21(22(26)14-17)24(30)18-9-5-4-8-16(18)2/h4-15,28H,3H2,1-2H3	432.106	[2-chloro-4-[(1-ethoxy-4-isoquinolyl)amino]phenyl]-(o-tolyl)methanethione	18460785	C25H21ClN2OS	284.0316:[C16H12ClNS]-H-;285.0404:[C16H12ClNS]-	1.8075601149174445	284.0316_540.0;285.0404_999.0	11	2
12.641385323338508	0.5958	InChI=1S/C21H20O10/c1-7(23)12-11(25)5-9-16(26)15-14(19(29)21(9,31)18(12)28)17(27)13-8(20(15,30)6-22)3-2-4-10(13)24/h2-4,9,15-16,22,24,26-28,30-31H,5-6H2,1H3/t9-,15-,16-,20?,21-/m1/s1	432.106	(4aR,11aR,12R,12aR)-3-acetyl-4,4a,6,7,11,12-hexahydroxy-11-(hydroxymethyl)-1,11a,12,12a-tetrahydrotetracene-2,5-dione	58648296	C21H20O10	59.0128:[C2H4O2]-H-;101.0236:[C4H7O3-H]-H-;125.0244:[C6H6O3]-H-	8.75358126427257	59.0128_188.8;101.0236_177.5;125.0244_187.2	11	3
5.433526008852374	0.5849	InChI=1S/C25H20O5S/c26-19-8-4-7-17-12-18-23(27)22(25(28)30-24(18)21(17)19)20(11-15-5-2-1-3-6-15)31-14-16-9-10-29-13-16/h1-10,13,20,26-27H,11-12,14H2	432.103	3-[1-(3-furylmethylsulfanyl)-2-phenyl-ethyl]-4,9-dihydroxy-5H-indeno[1,2-b]pyran-2-one	70074074	C25H20O5S	125.0244:[C6H3O3+2H]-	9.093903260601111	125.0244_187.2	11	1
106.5384706483038	0.5814	InChI=1S/C15H18F2N6O5S/c1-2-27-12-8-10(9-5-6-9)19-23(20-12)21-15(24)22-29(25,26)13-11(28-14(16)17)4-3-7-18-13/h3-4,7-9,14,19H,2,5-6H2,1H3,(H2,21,22,24)	432.103	1-(6-cyclopropyl-4-ethoxy-1H-triazin-2-yl)-3-[[3-(difluoromethoxy)-2-pyridyl]sulfonyl]urea	20077886	C15H18F2N6O5S	125.0244:[C4H6N3O2-2H]-H-;284.0316:[C8H9N6O4S]-H-;285.0404:[C8H10N6O4S]-H-	1.784515779704227	125.0244_187.2;284.0316_540.0;285.0404_999.0	11	3
96.74048158831076	0.5736	InChI=1S/C23H17FN4O2S/c24-19-5-2-1-4-15(19)13-29-17-10-16(22-27-20-6-3-7-26-23(20)28-22)11-18(12-17)30-14-21-25-8-9-31-21/h1-12H,13-14H2,(H,26,27,28)	432.106	2-[[3-[(2-fluorophenyl)methoxy]-5-(1H-imidazo[4,5-b]pyridin-2-yl)phenoxy]methyl]thiazole	59242994	C23H17FN4O2S	284.0316:[C16H12FO2S-2H]-H-;285.0404:[C16H12FO2S-H]-H-	2.360587214653429	284.0316_540.0;285.0404_999.0	11	2
90.43438949297568	0.5672	InChI=1S/C23H14F2N4O3/c24-17-2-1-3-18(25)15(17)11-29-12-16(22(31)21-19(29)8-9-20(30)28-21)23(32)27-14-6-4-13(10-26)5-7-14/h1-9,12H,11H2,(H,27,32)(H,28,30)	432.103	N-(4-cyanophenyl)-1-[(2,6-difluorophenyl)methyl]-4,6-dioxo-5H-1,5-naphthyridine-3-carboxamide	57390979	C23H14F2N4O3	191.0196:[C10H6F2NO-2H]-H-;285.0404:[C16H8N4O2-2H]-H-	2.7081985159473194	191.0196_169.7;285.0404_999.0	11	2
107.21146031491944	0.5671	InChI=1S/C25H21ClN2OS/c1-16-22(17(2)29)12-20(26)13-23(16)28-15-19-6-3-4-8-25(19)30-21-10-9-18-7-5-11-27-24(18)14-21/h3-14,28H,15H2,1-2H3	432.106	1-[5-chloro-2-methyl-3-[[2-(7-quinolylsulfanyl)phenyl]methylamino]phenyl]ethanone	68403463	C25H21ClN2OS	284.0316:[C16H13ClNS-H]-H-;285.0404:[C16H15ClNS-2H]-H-	1.5035733609429287	284.0316_540.0;285.0404_999.0	11	2
90.53269893804851	0.5658	InChI=1S/C20H15F3N4O4/c21-20(22,23)31-15-7-2-1-6-13(15)11-4-3-5-12(8-11)17-19(30)27(10-16(24)28)9-14(26-17)18(25)29/h1-9H,10H2,(H2,24,28)(H2,25,29)	432.105	4-(2-amino-2-oxo-ethyl)-5-oxo-6-[3-[2-(trifluoromethoxy)phenyl]phenyl]pyrazine-2-carboxamide	11697727	C20H15F3N4O4	125.0244:[C4H4N3O2]-H-;191.0196:[C7H6N4O3-2H]-H-;205.073:[C9H7N4O2+2H]-;285.0404:[C16H9F3NO-2H]-H-	2.6795725269067234	125.0244_187.2;191.0196_169.7;205.073_113.5;285.0404_999.0	11	4
90.23784094547823	0.5634	InChI=1S/C23H14F2N4O3/c24-17-5-2-6-18(25)15(17)11-29-12-16(22(31)21-19(29)7-8-20(30)28-21)23(32)27-14-4-1-3-13(9-14)10-26/h1-9,12H,11H2,(H,27,32)(H,28,30)	432.103	N-(3-cyanophenyl)-1-[(2,6-difluorophenyl)methyl]-4,6-dioxo-5H-1,5-naphthyridine-3-carboxamide	57394489	C23H14F2N4O3	191.0196:[C10H6F2NO-2H]-H-;285.0404:[C16H8N4O2-2H]-H-	2.661525180104955	191.0196_169.7;285.0404_999.0	11	2
106.50227506206271	0.5631	InChI=1S/C25H21ClN2OS/c1-2-15-28-23-6-4-3-5-21(23)24(27)22(25(28)29)16-17-7-11-19(12-8-17)30-20-13-9-18(26)10-14-20/h2-14H,1,15-16,27H2	432.106	1-allyl-4-amino-3-[[4-(4-chlorophenyl)sulfanylphenyl]methyl]quinolin-2-one	10310209	C25H21ClN2OS	284.0316:[C16H12ClNS]-H-;285.0404:[C16H12ClNS]-	1.4900309593566994	284.0316_540.0;285.0404_999.0	11	2
103.31751546470052	0.563	InChI=1S/C23H17FN4O2S/c1-12(21(29)26-14-5-3-2-4-6-14)31-23-27-19-15-8-7-13(24)11-17(15)18-16(20(19)28-23)9-10-25-22(18)30/h2-12H,1H3,(H,25,30)(H,26,29)(H,27,28)	432.106	NA	67356323	C23H17FN4O2S	191.0196:[C13H5FN-2H]-H-;284.0316:[C14H7FN3OS]-	1.7165119024200515	191.0196_169.7;284.0316_540.0	11	2
104.76715567600156	0.5626	InChI=1S/C20H14N7O5/c1-24-17-14(15(22-23-21)16(19(24)29)27(31)32)18(28)26(13-10-6-3-7-11-13)20(30)25(17)12-8-4-2-5-9-12/h2-11,16H,1H3/q+1	432.106	5-azido-8-methyl-6-nitro-1,3-diphenyl-6H-pyrido[2,3-d]pyrimidin-8-ium-2,4,7-trione	76851462	C20H14N7O5	284.0316:[C13H9N3O5-2H]-H-;285.0404:[C13H9N3O5-H]-H-	1.6064041747165347	284.0316_540.0;285.0404_999.0	11	2
106.50227506206271	0.5611	InChI=1S/C25H21ClN2OS/c1-2-16-28-21-11-7-6-10-20(21)23(27)22(25(28)29)24(17-8-4-3-5-9-17)30-19-14-12-18(26)13-15-19/h2-15,24H,1,16,27H2	432.106	1-allyl-4-amino-3-[(4-chlorophenyl)sulfanyl-phenyl-methyl]quinolin-2-one	69868170	C25H21ClN2OS	284.0316:[C16H12ClNS]-H-;285.0404:[C16H12ClNS]-	1.4568285913724526	284.0316_540.0;285.0404_999.0	11	2
85.87288819413386	0.5559	InChI=1S/C22H19ClF2N2O3/c1-11-4-5-13(21(28)26-3)8-16(11)18-12(2)27-22(29)19(23)20(18)30-10-14-6-7-15(24)9-17(14)25/h4-9H,10H2,1-3H3,(H,26,28)(H,27,29)	432.105	3-[5-chloro-4-[(2,4-difluorophenyl)methoxy]-2-methyl-6-oxo-1H-pyridin-3-yl]-N,4-dimethyl-benzamide	69792840	C22H19ClF2N2O3	100.9666:[C3HClNO]-H-;284.0316:[C13H9ClF2NO2]-	2.8523250439762937	100.9666_99.2;284.0316_540.0	11	2
90.91482975159178	0.5513	InChI=1S/C22H19ClF2N2O3/c1-12-4-5-14(21(28)26-3)9-18(12)27-13(2)8-19(20(23)22(27)29)30-11-15-6-7-16(24)10-17(15)25/h4-10H,11H2,1-3H3,(H,26,28)	432.105	3-[3-chloro-4-[(2,4-difluorophenyl)methoxy]-6-methyl-2-oxo-1-pyridyl]-N,4-dimethyl-benzamide	22050695	C22H19ClF2N2O3	100.9666:[C3ClNO]-;284.0316:[C13H9ClF2NO2]-	2.41620282326263	100.9666_99.2;284.0316_540.0	11	2
90.91482975159178	0.5513	InChI=1S/C22H19ClF2N2O3/c1-12-9-19(30-11-14-7-8-15(24)10-17(14)25)20(23)22(29)27(12)18-6-4-5-16(13(18)2)21(28)26-3/h4-10H,11H2,1-3H3,(H,26,28)	432.105	3-[3-chloro-4-[(2,4-difluorophenyl)methoxy]-6-methyl-2-oxo-1-pyridyl]-N,2-dimethyl-benzamide	22050860	C22H19ClF2N2O3	100.9666:[C3ClNO]-;284.0316:[C13H9ClF2NO2]-	2.41620282326263	100.9666_99.2;284.0316_540.0	11	2
98.65067075128134	0.5505	InChI=1S/C25H21ClN2OS/c1-3-29-25-23(20-11-7-5-9-17(20)15-27-25)28-18-12-13-21(22(26)14-18)24(30)19-10-6-4-8-16(19)2/h4-15,28H,3H2,1-2H3	432.106	[2-chloro-4-[(3-ethoxy-4-isoquinolyl)amino]phenyl]-(o-tolyl)methanethione	18460806	C25H21ClN2OS	284.0316:[C16H11ClNS]-;285.0404:[C16H11ClNS+H]-	1.8480322190457297	284.0316_540.0;285.0404_999.0	11	2
102.61944448420934	0.5457	InChI=1S/C25H21ClN2OS/c1-30-17-12-10-16(11-13-17)24-23-19(18-6-3-5-9-22(18)27-23)14-15-28(24)25(29)20-7-2-4-8-21(20)26/h2-13,24,27H,14-15H2,1H3/t24-/m1/s1	432.106	(2-chlorophenyl)-[(1R)-1-(4-methylsulfanylphenyl)-1,3,4,9-tetrahydropyrido[3,4-b]indol-2-yl]methanone	92498392	C25H21ClN2OS	100.9666:[C3ClNO]-;284.0316:[C16H14ClNS-2H]-H-;285.0404:[C16H14ClNS-H]-H-	1.4856801180917618	100.9666_99.2;284.0316_540.0;285.0404_999.0	11	3
90.91482975159178	0.5439	InChI=1S/C22H19ClF2N2O3/c1-12-8-14(21(28)26-3)5-7-18(12)27-13(2)9-19(20(23)22(27)29)30-11-15-4-6-16(24)10-17(15)25/h4-10H,11H2,1-3H3,(H,26,28)	432.105	4-[3-chloro-4-[(2,4-difluorophenyl)methoxy]-6-methyl-2-oxo-1-pyridyl]-N,3-dimethyl-benzamide	22050402	C22H19ClF2N2O3	100.9666:[C3ClNO]-;284.0316:[C13H9ClF2NO2]-	2.2964389597351715	100.9666_99.2;284.0316_540.0	11	2
91.37501076016046	0.5439	InChI=1S/C22H19ClF2N2O3/c1-13-9-20(30-12-16-5-6-17(24)10-19(16)25)21(23)22(29)27(13)11-15-3-7-18(8-4-15)26-14(2)28/h3-10H,11-12H2,1-2H3,(H,26,28)	432.105	N-[4-[[3-chloro-4-[(2,4-difluorophenyl)methoxy]-6-methyl-2-oxo-1-pyridyl]methyl]phenyl]acetamide	22050558	C22H19ClF2N2O3	100.9666:[C3H2ClNO-H]-H-;284.0316:[C13H9ClF2NO2]-	2.2628396075003048	100.9666_99.2;284.0316_540.0	11	2
102.8065407358315	0.5433	InChI=1S/C25H21ClN2OS/c1-3-29-28(24-16-27-15-18-9-5-7-11-21(18)24)19-12-13-22(23(26)14-19)25(30)20-10-6-4-8-17(20)2/h4-16H,3H2,1-2H3	432.106	[2-chloro-4-[ethoxy(4-isoquinolyl)amino]phenyl]-(o-tolyl)methanethione	88078413	C25H21ClN2OS	284.0316:[C16H11ClNS]-;285.0404:[C16H11ClNS+H]-	1.4332622289959953	284.0316_540.0;285.0404_999.0	11	2
103.03018494876828	0.5399	InChI=1S/C25H21ClN2OS/c1-17-3-7-20(8-4-17)24(29)16-30-25-27-23(19-9-11-21(26)12-10-19)15-28(25)22-13-5-18(2)6-14-22/h3-15H,16H2,1-2H3	432.106	2-[4-(4-chlorophenyl)-1-(p-tolyl)imidazol-2-yl]sulfanyl-1-(p-tolyl)ethanone	3451162	C25H21ClN2OS	284.0316:[C16H12ClNS]-H-;285.0404:[C16H12ClNS]-	1.3623978934997782	284.0316_540.0;285.0404_999.0	11	2
5.51637539272212	0.5378	InChI=1S/C25H20O5S/c1-31-19-10-8-18(9-11-19)25(27)20(13-16-5-3-2-4-6-16)23(24(26)30-25)17-7-12-21-22(14-17)29-15-28-21/h2-12,14,27H,13,15H2,1H3	432.103	3-(1,3-benzodioxol-5-yl)-4-benzyl-5-hydroxy-5-(4-methylsulfanylphenyl)furan-2-one	10622616	C25H20O5S	59.0128:[C2H2O2+H]-;125.0244:[C6H4O3+H]-	8.32495353802863	59.0128_188.8;125.0244_187.2	11	2
100.51882342588911	0.5368	InChI=1S/C25H21ClN2OS/c26-18-12-10-17(11-13-18)25-24-21(20-8-4-5-9-22(20)27-24)14-15-28(25)23(29)16-30-19-6-2-1-3-7-19/h1-13,25,27H,14-16H2/t25-/m1/s1	432.106	1-[(1R)-1-(4-chlorophenyl)-1,3,4,9-tetrahydropyrido[3,4-b]indol-2-yl]-2-phenylsulfanyl-ethanone	92335971	C25H21ClN2OS	284.0316:[C16H14ClNS-2H]-H-;285.0404:[C16H14ClNS-H]-H-	1.4928668178604507	284.0316_540.0;285.0404_999.0	11	2
100.51882342588911	0.5364	InChI=1S/C25H21ClN2OS/c1-30-19-11-9-16(10-12-19)24-23-21(20-7-2-3-8-22(20)27-23)13-14-28(24)25(29)17-5-4-6-18(26)15-17/h2-12,15,24,27H,13-14H2,1H3/t24-/m1/s1	432.106	(3-chlorophenyl)-[(1R)-1-(4-methylsulfanylphenyl)-1,3,4,9-tetrahydropyrido[3,4-b]indol-2-yl]methanone	92498382	C25H21ClN2OS	284.0316:[C16H14ClNS-2H]-H-;285.0404:[C16H14ClNS-H]-H-	1.4856801180917618	284.0316_540.0;285.0404_999.0	11	2
100.51882342588911	0.5364	InChI=1S/C25H21ClN2OS/c1-30-19-12-8-16(9-13-19)24-23-21(20-4-2-3-5-22(20)27-23)14-15-28(24)25(29)17-6-10-18(26)11-7-17/h2-13,24,27H,14-15H2,1H3/t24-/m1/s1	432.106	(4-chlorophenyl)-[(1R)-1-(4-methylsulfanylphenyl)-1,3,4,9-tetrahydropyrido[3,4-b]indol-2-yl]methanone	92498378	C25H21ClN2OS	284.0316:[C16H14ClNS-2H]-H-;285.0404:[C16H14ClNS-H]-H-	1.4856801180917618	284.0316_540.0;285.0404_999.0	11	2
6.617681111002055	0.5359	InChI=1S/C25H20O5S/c1-14-12-20(16(3)31-14)21(26)13-29-25(28)19-11-7-10-18-22(27)15(2)23(30-24(18)19)17-8-5-4-6-9-17/h4-12H,13H2,1-3H3	432.103	[2-(2,5-dimethyl-3-thienyl)-2-oxo-ethyl] 3-methyl-4-oxo-2-phenyl-chromene-8-carboxylate	16562369	C25H20O5S	59.0128:[C2H2O2+H]-;125.0244:[C6H5O3]-	8.214397890295336	59.0128_188.8;125.0244_187.2	11	2
101.26880731126043	0.534	InChI=1S/C25H21ClN2OS/c26-21-11-10-19(17-8-4-5-9-18(17)21)24(29)23-20-12-13-28(15-22(20)30-25(23)27)14-16-6-2-1-3-7-16/h1-11H,12-15,27H2	432.106	(2-amino-6-benzyl-5,7-dihydro-4H-thieno[2,3-c]pyridin-3-yl)-(4-chloro-1-naphthyl)methanone	10917051	C25H21ClN2OS	284.0316:[C16H10ClNS+H]-;285.0404:[C16H10ClNS+2H]-	1.3934207091569206	284.0316_540.0;285.0404_999.0	11	2
101.98039553853675	0.524	InChI=1S/C25H21ClN2OS/c1-18-24(20-12-6-3-7-13-20)27-25(30-18)28(22-15-9-8-14-21(22)26)23(29)17-16-19-10-4-2-5-11-19/h2-15H,16-17H2,1H3	432.106	N-(2-chlorophenyl)-N-(5-methyl-4-phenyl-thiazol-2-yl)-3-phenyl-propanamide	2195576	C25H21ClN2OS	284.0316:[C16H12ClNS]-H-;285.0404:[C16H12ClNS]-	1.1802114718042582	284.0316_540.0;285.0404_999.0	11	2
8.390319426347983	0.5096	InChI=1S/C25H20O5S/c26-23(19-11-5-2-6-12-19)30-21-14-8-7-13-20(21)25(28)15-16-29-24(27)22(25)31-17-18-9-3-1-4-10-18/h1-16,22,28H,17H2	432.103	[2-(3-benzylsulfanyl-4-hydroxy-2-oxo-3H-pyran-4-yl)phenyl] benzoate	67617876	C25H20O5S	101.0236:[C4H3O3+2H]-;125.0244:[C6H4O3+H]-	7.660694286793998	101.0236_177.5;125.0244_187.2	11	2
84.52126565919104	0.5007	InChI=1S/C23H17FN4O2S/c24-15-7-5-13(6-8-15)17-11-31-22-20(17)21(26-12-27-22)28-19(23(29)30)9-14-10-25-18-4-2-1-3-16(14)18/h1-8,10-12,19,25H,9H2,(H,29,30)(H,26,27,28)	432.106	2-[[5-(4-fluorophenyl)thieno[2,3-d]pyrimidin-4-yl]amino]-3-(1H-indol-3-yl)propanoic acid	84229528	C23H17FN4O2S	59.0128:[C2H2O2+H]-;125.0244:[C4H4N3O2]-H-;191.0196:[C10H5FNS+H]-;205.073:[C9H8N4O2+H]-;284.0316:[C14H8FN3OS]-H-	2.0546738689174893	59.0128_188.8;125.0244_187.2;191.0196_169.7;205.073_113.5;284.0316_540.0	11	5
16.732957085082443	0.4812	InChI=1S/C21H20O10/c1-10(22)29-18-5-4-13(6-19(18)30-11(2)23)21(28)20(31-12(3)24)9-15-16(26)7-14(25)8-17(15)27/h4-8,20,25-27H,9H2,1-3H3	432.106	[2-acetoxy-4-[2-acetoxy-3-(2,4,6-trihydroxyphenyl)propanoyl]phenyl] acetate	70018740	C21H20O10	59.0128:[C2H3O2]-;101.0236:[C4H4O3+H]-;125.0244:[C6H5O3]-	6.60165667121072	59.0128_188.8;101.0236_177.5;125.0244_187.2	11	3
84.0701799276199	0.477	InChI=1S/C17H16N6O8/c1-3-30-16(24)12-7-10(19-21-15(12)17(25)31-4-2)9-18-20-13-6-5-11(22(26)27)8-14(13)23(28)29/h5-9,20H,3-4H2,1-2H3/b18-9-	432.103	diethyl 6-[(Z)-[(2,4-dinitrophenyl)hydrazono]methyl]pyridazine-3,4-dicarboxylate	21816130	C17H16N6O8	59.0128:[C2H2O2+H]-;125.0244:[C4H3N3O2]-;191.0196:[C7H5N4O3-H]-H-;205.073:[C9H8N4O2+H]-;284.0316:[C11H6N6O4-H]-H-	1.7026662024759558	59.0128_188.8;125.0244_187.2;191.0196_169.7;205.073_113.5;284.0316_540.0	11	5
90.60715296870058	0.4751	InChI=1S/C25H21ClN2OS/c1-18-11-13-20(14-12-18)23-17-30-25(27-23)28(16-15-19-7-3-2-4-8-19)24(29)21-9-5-6-10-22(21)26/h2-14,17H,15-16H2,1H3	432.106	2-chloro-N-(2-phenylethyl)-N-[4-(p-tolyl)thiazol-2-yl]benzamide	3189560	C25H21ClN2OS	284.0316:[C16H13ClNS-H]-H-;285.0404:[C16H13ClNS]-H-	1.203590287014743	284.0316_540.0;285.0404_999.0	11	2
90.60715296870058	0.4751	InChI=1S/C25H21ClN2OS/c1-18-10-12-20(13-11-18)23-17-30-25(27-23)28(15-14-19-6-3-2-4-7-19)24(29)21-8-5-9-22(26)16-21/h2-13,16-17H,14-15H2,1H3	432.106	3-chloro-N-(2-phenylethyl)-N-[4-(p-tolyl)thiazol-2-yl]benzamide	3189561	C25H21ClN2OS	284.0316:[C16H13ClNS-H]-H-;285.0404:[C16H13ClNS]-H-	1.203590287014743	284.0316_540.0;285.0404_999.0	11	2
82.50260152653533	0.4636	InChI=1S/C25H21ClN2OS/c1-25(2,29)24-15-21(28(27-24)20-9-4-3-8-19(20)26)23-13-12-22(30-23)18-11-10-16-6-5-7-17(16)14-18/h3-6,8-15,29H,7H2,1-2H3	432.106	2-[1-(2-chlorophenyl)-5-[5-(3H-inden-5-yl)-2-thienyl]pyrazol-3-yl]propan-2-ol	59632777	C25H21ClN2OS	284.0316:[C16H10ClNS+H]-;285.0404:[C16H10ClNS+2H]-	1.5978150124288168	284.0316_540.0;285.0404_999.0	11	2
1.6922696542693398	0.459	InChI=1S/C25H20O5S/c1-2-29-23(28)14-5-16-3-11-20(12-4-16)30-24-21-13-10-19(27)15-22(21)31-25(24)17-6-8-18(26)9-7-17/h3-15,26-27H,2H2,1H3/b14-5+	432.103	ethyl (E)-3-[4-[6-hydroxy-2-(4-hydroxyphenyl)benzothiophen-3-yl]oxyphenyl]prop-2-enoate	78324254	C25H20O5S	59.0128:[C2H2O2+H]-	7.32168840055098	59.0128_188.8	11	1
7.491048052679761	0.4568	InChI=1S/C25H20O5S/c1-3-28-19-10-13-23-21(15-19)24(16(2)29-23)25(27)30-18-8-6-17(7-9-18)22(26)12-11-20-5-4-14-31-20/h4-15H,3H2,1-2H3/b12-11+	432.103	[4-[(E)-3-(2-thienyl)prop-2-enoyl]phenyl] 5-ethoxy-2-methyl-benzofuran-3-carboxylate	6124201	C25H20O5S	101.0236:[C4H3O3+2H]-;125.0244:[C6H3O3+2H]-	6.869970688427142	101.0236_177.5;125.0244_187.2	11	2
82.98761687306951	0.4553	InChI=1S/C14H22BN4O7PS/c1-6-8(4-18(3)5-9(21)16-28(24)25)12(14(23)26-27-17-15)19-11(6)10(7(2)20)13(19)22/h6-7,10-11,17,20,27H,4-5H2,1-3H3,(H,16,21)(H,24,25)/t6-,7+,10+,11?,27?/m0/s1	432.104	[[(4S,6S)-6-[(1R)-1-hydroxyethyl]-4-methyl-3-[[methyl-[2-oxo-2-(sulfinoamino)ethyl]amino]methyl]-7-oxo-1-azabicyclo[3.2.0]hept-2-ene-2-carbonyl]oxyphosphanylamino]boron	89126618	C14H22BN4O7PS	100.9666:[C2H2NO2P-H]-H-;205.073:[C11H13NO3-H]-H-;285.0404:[C10H14N3O5S-2H]-H-	1.4290325032136961	100.9666_99.2;205.073_113.5;285.0404_999.0	11	3
80.86057294560851	0.4503	InChI=1S/C25H21ClN2OS/c1-30-20-6-4-5-18(15-20)17-9-11-19(12-10-17)28-16-23(25(29)13-14-25)27-24(28)21-7-2-3-8-22(21)26/h2-12,15-16,29H,13-14H2,1H3	432.106	1-[2-(2-chlorophenyl)-1-[4-(3-methylsulfanylphenyl)phenyl]imidazol-4-yl]cyclopropanol	90149058	C25H21ClN2OS	284.0316:[C16H11ClNS]-;285.0404:[C16H11ClNS+H]-	1.500397993388539	284.0316_540.0;285.0404_999.0	11	2
9.65804105203503	0.4476	InChI=1S/C21H20O10/c1-30-18-10-12(3-8-16(18)24)2-6-14(22)11-15(23)7-4-13-5-9-17(25)20(19(13)26)31-21(27,28)29/h2-10,24-29H,11H2,1H3/b6-2+,7-4+	432.106	(1E,6E)-1-[2,4-dihydroxy-3-(trihydroxymethoxy)phenyl]-7-(4-hydroxy-3-methoxy-phenyl)hepta-1,6-diene-3,5-dione	87090756	C21H20O10	101.0236:[C4H3O3+2H]-;125.0244:[C6H4O3+H]-	6.564627727774965	101.0236_177.5;125.0244_187.2	11	2
64.86063652823134	0.4419	InChI=1S/C19H20ClF3N2O4/c1-18(2,3)29-17(26)25-9-11-5-6-13(15(7-11)28-19(21,22)23)14-8-12(20)10-24-16(14)27-4/h5-8,10H,9H2,1-4H3,(H,25,26)	432.106	tert-butyl N-[[4-(5-chloro-2-methoxy-3-pyridyl)-3-(trifluoromethoxy)phenyl]methyl]carbamate	67244039	C19H20ClF3N2O4	100.9666:[C3HClNO]-H-;191.0196:[C7H5F3NO2]-H-;284.0316:[C13H8ClF2NO2+H]-	2.5122662477863966	100.9666_99.2;191.0196_169.7;284.0316_540.0	11	3
82.60929954720753	0.4373	InChI=1S/C16H25ClN4O4SSi/c1-25-16(22)14(11-19-21-18)15(12-5-7-13(17)8-6-12)20-26(23,24)9-10-27(2,3)4/h5-8,14-15,20H,9-11H2,1-4H3/t14-,15+/m1/s1	432.105	methyl (2R,3R)-2-(azidomethyl)-3-(4-chlorophenyl)-3-(2-trimethylsilylethylsulfonylamino)propanoate	25257033	C16H25ClN4O4SSi	59.0128:[C2H3O2]-;205.073:[C9H11N4O2-H]-H-;285.0404:[C12H19ClNOSSi-2H]-H-	1.1637258591195154	59.0128_188.8;205.073_113.5;285.0404_999.0	11	3
74.00279903485117	0.4321	InChI=1S/C17H17ClF3N5O3/c1-26(15-14(18)7-12(8-22-15)17(19,20)21)25-16(27)23-10-24-29-9-11-3-5-13(28-2)6-4-11/h3-8,10H,9H2,1-2H3,(H2,23,24,25,27)/p+1	432.105	[[3-chloro-5-(trifluoromethyl)-2-pyridyl]-methyl-amino]carbamoyl-[[(4-methoxyphenyl)methoxyamino]methylene]ammonium	4205326	C17H17ClF3N5O3	101.0236:[C2H3N3O2]-;125.0244:[C4H5N3O2-H]-H-;191.0196:[C7H6ClF2N2]-;205.073:[C9H12N4O2-2H]-H-;284.0316:[C8H7ClF3N4O2+H]-	1.696648947091087	101.0236_177.5;125.0244_187.2;191.0196_169.7;205.073_113.5;284.0316_540.0	11	5
79.38809010321118	0.4318	InChI=1S/C25H21ClN2OS/c26-20-11-14-22-23(15-20)30-25(28-22)27-21-12-9-17(10-13-21)16-5-7-19(8-6-16)24(29)18-3-1-2-4-18/h5-15,18H,1-4H2,(H,27,28)	432.106	[4-[4-[(6-chloro-1,3-benzothiazol-2-yl)amino]phenyl]phenyl]-cyclopentyl-methanone	87369553	C25H21ClN2OS	284.0316:[C16H10ClNS+H]-;285.0404:[C16H10ClNS+2H]-	1.306477480742381	284.0316_540.0;285.0404_999.0	11	2
79.38809010321118	0.4318	InChI=1S/C25H21ClN2OS/c26-20-11-14-23-22(15-20)28-25(30-23)27-21-12-9-17(10-13-21)16-5-7-19(8-6-16)24(29)18-3-1-2-4-18/h5-15,18H,1-4H2,(H,27,28)	432.106	[4-[4-[(5-chloro-1,3-benzothiazol-2-yl)amino]phenyl]phenyl]-cyclopentyl-methanone	87368944	C25H21ClN2OS	284.0316:[C16H10ClNS+H]-;285.0404:[C16H10ClNS+2H]-	1.306477480742381	284.0316_540.0;285.0404_999.0	11	2
2.803182180252466	0.4275	InChI=1S/C25H20O5S/c26-22-12-23(27)25-20(5-2-6-21(22)25)18-9-7-16(8-10-18)13-30-19-4-1-3-17(11-19)14-31-15-24(28)29/h1-11H,12-15H2,(H,28,29)	432.103	2-[[3-[[4-(1,3-dioxoindan-4-yl)phenyl]methoxy]phenyl]methylsulfanyl]acetic acid	69087984	C25H20O5S	59.0128:[C2H3O2]-	6.731301863486246	59.0128_188.8	11	1
2.803182180252466	0.4275	InChI=1S/C25H20O5S/c26-23-12-24(27)22-11-19(8-9-21(22)23)18-6-4-16(5-7-18)13-30-20-3-1-2-17(10-20)14-31-15-25(28)29/h1-11H,12-15H2,(H,28,29)	432.103	2-[[3-[[4-(1,3-dioxoindan-5-yl)phenyl]methoxy]phenyl]methylsulfanyl]acetic acid	69088207	C25H20O5S	59.0128:[C2H3O2]-	6.731301863486246	59.0128_188.8	11	1
70.44828040900867	0.4246	InChI=1S/C17H16N6O8/c1-18-16(25)20-9-3-6-14(12(7-9)21-17(26)19-2)31-15(24)11-5-4-10(22(27)28)8-13(11)23(29)30/h3-8H,1-2H3,(H2,18,20,25)(H2,19,21,26)	432.103	[2,4-bis(methylcarbamoylamino)phenyl] 2,4-dinitrobenzoate	53987307	C17H16N6O8	205.073:[C9H10N4O2]-H-;285.0404:[C13H10N3O5-2H]-H-	1.8302163049862825	205.073_113.5;285.0404_999.0	11	2
77.08814358839068	0.4244	InChI=1S/C20H18ClF5N2O/c21-15-9-11(20(24,25)26)10-27-17(15)14-7-3-4-8-16(14)28-19(29)13-6-2-1-5-12(13)18(22)23/h1-2,5-6,9-10,14,16,18H,3-4,7-8H2,(H,28,29)	432.103	N-[2-[3-chloro-5-(trifluoromethyl)-2-pyridyl]cyclohexyl]-2-(difluoromethyl)benzamide	87611743	C20H18ClF5N2O	285.0404:[C13H12ClF3N2-2H]-H-	1.3502130558363454	285.0404_999.0	11	1
78.0503209178323	0.4241	InChI=1S/C20H20FN3O5S/c1-30(28,29)23-16-9-5-3-7-14(16)17-12-18(13-6-2-4-8-15(13)21)24(22-17)19(25)10-11-20(26)27/h2-9,18,23H,10-12H2,1H3,(H,26,27)/p-1/t18-/m1/s1	432.103	4-[(3R)-3-(2-fluorophenyl)-5-[2-(methanesulfonamido)phenyl]-3,4-dihydropyrazol-2-yl]-4-oxo-butanoate	40900767	C20H20FN3O5S	59.0128:[C2H2O2+H]-;101.0236:[C4H4O3+H]-;205.073:[C11H9NO3+2H]-;285.0404:[C10H11N3O5S]-	1.2764143007444475	59.0128_188.8;101.0236_177.5;205.073_113.5;285.0404_999.0	11	4
72.45635009671932	0.4216	InChI=1S/C17H17ClF3N5O3/c1-25(15-14(18)7-12(8-23-15)17(19,20)21)26(16(22)27)10-24-29-9-11-3-5-13(28-2)6-4-11/h3-8,10H,9H2,1-2H3,(H2,22,27)/p+1	432.105	(E)-carbamoyl-[[3-chloro-5-(trifluoromethyl)-2-pyridyl]-methyl-amino]-[[(4-methoxyphenyl)methoxyamino]methylene]ammonium	20850531	C17H17ClF3N5O3	101.0236:[C2H4N3O2]-H-;125.0244:[C4H6N3O2-2H]-H-;191.0196:[C7H5ClF2N2+H]-;205.073:[C9H12N4O2-2H]-H-;284.0316:[C8H8ClF3N4O2]-	1.6374109179984975	101.0236_177.5;125.0244_187.2;191.0196_169.7;205.073_113.5;284.0316_540.0	11	5
1.7833357325690724	0.4153	InChI=1S/C25H20O5S/c1-29-15-17-4-2-3-5-20(17)25-24(21-12-9-18(26)14-22(21)31-25)30-19-10-6-16(7-11-19)8-13-23(27)28/h2-14,26H,15H2,1H3,(H,27,28)	432.103	3-[4-[6-hydroxy-2-[2-(methoxymethyl)phenyl]benzothiophen-3-yl]oxyphenyl]prop-2-enoic acid	123296867	C25H20O5S	59.0128:[C2H2O2+H]-	6.605836260503703	59.0128_188.8	11	1
55.763860473928766	0.4087	InChI=1S/C22H19ClF2N2O3/c1-2-30-22(29)14-11-27(13-8-9-13)20-15(21(14)28)19(17(24)16(23)18(20)25)26-10-12-6-4-3-5-7-12/h3-7,11,13,26H,2,8-10H2,1H3	432.105	ethyl 5-(benzylamino)-7-chloro-1-cyclopropyl-6,8-difluoro-4-oxo-quinoline-3-carboxylate	23431782	C22H19ClF2N2O3	59.0128:[C2H2O2+H]-;125.0244:[C6H6O3]-H-;205.073:[C11H11NO3]-;284.0316:[C13H11ClF2NO2-H]-H-	2.6267381302689135	59.0128_188.8;125.0244_187.2;205.073_113.5;284.0316_540.0	11	4
1.7833357325690724	0.4071	InChI=1S/C25H20O5S/c1-15(26)19-4-2-3-5-20(19)25-24(21-12-9-17(27)14-22(21)31-25)30-18-10-6-16(7-11-18)8-13-23(28)29/h2-15,26-27H,1H3,(H,28,29)/t15-/m0/s1	432.103	3-[4-[6-hydroxy-2-[2-[(1S)-1-hydroxyethyl]phenyl]benzothiophen-3-yl]oxyphenyl]prop-2-enoic acid	123729621	C25H20O5S	59.0128:[C2H2O2+H]-	6.472724458701048	59.0128_188.8	11	1
73.28761679215071	0.4012	InChI=1S/C20H20FN3O5S/c1-30(28,29)23-16-4-2-3-14(11-16)17-12-18(13-5-7-15(21)8-6-13)24(22-17)19(25)9-10-20(26)27/h2-8,11,18,23H,9-10,12H2,1H3,(H,26,27)/p-1/t18-/m0/s1	432.103	4-[(3S)-3-(4-fluorophenyl)-5-[3-(methanesulfonamido)phenyl]-3,4-dihydropyrazol-2-yl]-4-oxo-butanoate	41030551	C20H20FN3O5S	59.0128:[C2H2O2+H]-;101.0236:[C4H4O3+H]-;205.073:[C11H9NO3+2H]-;285.0404:[C10H11N3O5S]-	1.2478192782463058	59.0128_188.8;101.0236_177.5;205.073_113.5;285.0404_999.0	11	4
73.28761679215071	0.4012	InChI=1S/C20H20FN3O5S/c1-30(28,29)23-16-7-3-4-13(11-16)17-12-18(14-5-2-6-15(21)10-14)24(22-17)19(25)8-9-20(26)27/h2-7,10-11,18,23H,8-9,12H2,1H3,(H,26,27)/p-1/t18-/m1/s1	432.103	4-[(3R)-3-(3-fluorophenyl)-5-[3-(methanesulfonamido)phenyl]-3,4-dihydropyrazol-2-yl]-4-oxo-butanoate	41170853	C20H20FN3O5S	59.0128:[C2H2O2+H]-;101.0236:[C4H4O3+H]-;205.073:[C11H9NO3+2H]-;285.0404:[C10H11N3O5S]-	1.2478192782463058	59.0128_188.8;101.0236_177.5;205.073_113.5;285.0404_999.0	11	4
73.28761679215071	0.4012	InChI=1S/C20H20FN3O5S/c1-30(28,29)23-14-6-4-5-13(11-14)17-12-18(15-7-2-3-8-16(15)21)24(22-17)19(25)9-10-20(26)27/h2-8,11,18,23H,9-10,12H2,1H3,(H,26,27)/p-1/t18-/m1/s1	432.103	4-[(3R)-3-(2-fluorophenyl)-5-[3-(methanesulfonamido)phenyl]-3,4-dihydropyrazol-2-yl]-4-oxo-butanoate	41058530	C20H20FN3O5S	59.0128:[C2H2O2+H]-;101.0236:[C4H4O3+H]-;205.073:[C11H9NO3+2H]-;285.0404:[C10H11N3O5S]-	1.2478192782463058	59.0128_188.8;101.0236_177.5;205.073_113.5;285.0404_999.0	11	4
11.917851843081756	0.3981	InChI=1S/C25H20O5S/c1-31-19-9-6-17(7-10-19)21(26)11-13-23(27)29-15-18-14-24(28)30-22-12-8-16-4-2-3-5-20(16)25(18)22/h2-10,12,14H,11,13,15H2,1H3	432.103	(3-oxobenzo[f]chromen-1-yl)methyl 4-(4-methylsulfanylphenyl)-4-oxo-butanoate	24376979	C25H20O5S	59.0128:[C2H2O2+H]-;101.0236:[C4H4O3+H]-;125.0244:[C6H5O3]-	5.600589609966891	59.0128_188.8;101.0236_177.5;125.0244_187.2	11	3
71.96697003597893	0.3954	InChI=1S/C20H20FN3O5S/c1-30(28,29)23-16-7-5-13(6-8-16)17-12-18(14-3-2-4-15(21)11-14)24(22-17)19(25)9-10-20(26)27/h2-8,11,18,23H,9-10,12H2,1H3,(H,26,27)/p-1/t18-/m1/s1	432.103	4-[(3R)-3-(3-fluorophenyl)-5-[4-(methanesulfonamido)phenyl]-3,4-dihydropyrazol-2-yl]-4-oxo-butanoate	41170811	C20H20FN3O5S	59.0128:[C2H2O2+H]-;101.0236:[C4H4O3+H]-;205.073:[C11H9NO3+2H]-;285.0404:[C10H10N3O5S+H]-	1.2478192782463058	59.0128_188.8;101.0236_177.5;205.073_113.5;285.0404_999.0	11	4
71.96697003597893	0.3954	InChI=1S/C20H20FN3O5S/c1-30(28,29)23-16-8-4-13(5-9-16)17-12-18(14-2-6-15(21)7-3-14)24(22-17)19(25)10-11-20(26)27/h2-9,18,23H,10-12H2,1H3,(H,26,27)/p-1/t18-/m1/s1	432.103	4-[(3R)-3-(4-fluorophenyl)-5-[4-(methanesulfonamido)phenyl]-3,4-dihydropyrazol-2-yl]-4-oxo-butanoate	40920642	C20H20FN3O5S	59.0128:[C2H2O2+H]-;101.0236:[C4H4O3+H]-;205.073:[C11H9NO3+2H]-;285.0404:[C10H10N3O5S+H]-	1.2478192782463058	59.0128_188.8;101.0236_177.5;205.073_113.5;285.0404_999.0	11	4
71.15278544494751	0.3951	InChI=1S/C20H19FN3O5S/c1-12(2)18-22-19(29-23-18)13(3)28-20(25)14-4-10-17(11-5-14)30(26,27)24-16-8-6-15(21)7-9-16/h4-13H,1-3H3/q-1/t13-/m0/s1	432.103	(4-fluorophenyl)-[4-[(1S)-1-(3-isopropyl-1,2,4-oxadiazol-5-yl)ethoxy]carbonylphenyl]sulfonyl-azanide	52580576	C20H19FN3O5S	101.0236:[C4H4O3+H]-;125.0244:[C6H5O3]-;205.073:[C11H13NO3-H]-H-;285.0404:[C10H9N3O5S+2H]-	1.3011943572906677	101.0236_177.5;125.0244_187.2;205.073_113.5;285.0404_999.0	11	4
61.73515158255958	0.3934	InChI=1S/C17H16N6O8/c1-28-14-7-11(8-15(29-2)16(14)30-3)21-17(18-19-20-21)31-9-10-4-12(22(24)25)6-13(5-10)23(26)27/h4-8H,9H2,1-3H3	432.103	5-[(3,5-dinitrophenyl)methoxy]-1-(3,4,5-trimethoxyphenyl)tetrazole	90683208	C17H16N6O8	125.0244:[C6H7O3-H]-H-;191.0196:[C7H5N4O3-H]-H-;205.073:[C9H8N4O2+H]-;284.0316:[C11H7N6O4-2H]-H-	1.9497278776434728	125.0244_187.2;191.0196_169.7;205.073_113.5;284.0316_540.0	11	4
69.72460188992214	0.3926	InChI=1S/C17H25ClN4O3S2/c1-19-16-22(2)17(23,11-26-16)12-8-9-14(18)15(10-12)27(24,25)21-20-13-6-4-3-5-7-13/h8-10,13,20-21,23H,3-7,11H2,1-2H3	432.106	2-chloro-N''-cyclohexyl-5-(4-hydroxy-3-methyl-2-methylimino-thiazolidin-4-yl)benzenesulfonohydrazide	20359085	C17H25ClN4O3S2	191.0196:[C7H8ClNOS+2H]-;284.0316:[C11H12N2O3S2]-	1.3633203962819145	191.0196_169.7;284.0316_540.0	11	2
0.0	0.3879	InChI=1S/C25H20O5S/c1-2-16(25(28)29)13-15-3-10-20(11-4-15)30-23-21-12-9-19(27)14-22(21)31-24(23)17-5-7-18(26)8-6-17/h3-14,26-27H,2H2,1H3,(H,28,29)	432.103	2-[[4-[6-hydroxy-2-(4-hydroxyphenyl)benzothiophen-3-yl]oxyphenyl]methylene]butanoic acid	123734602	C25H20O5S	NA	6.29058831587896	NA	11	0
68.51756022788913	0.3846	InChI=1S/C21H16F4N4S/c1-30-15-10-16(27-17(11-15)26-14-7-5-13(12-22)6-8-14)19-20(21(23,24)25)28-18-4-2-3-9-29(18)19/h2-11H,12H2,1H3,(H,26,27)	432.103	N-[4-(fluoromethyl)phenyl]-4-methylsulfanyl-6-[2-(trifluoromethyl)imidazo[1,2-a]pyridin-3-yl]pyridin-2-amine	122580337	C21H16F4N4S	191.0196:[C10H8FNS-H]-H-;285.0404:[C11H7F3N4S+H]-	1.319710113407585	191.0196_169.7;285.0404_999.0	11	2
62.58382102275826	0.3806	InChI=1S/C20H23N3O4S2/c24-17-5-3-4-15-14-8-13(10-23(15)17)9-21(11-14)12-16-19(27)22(20(28)29-16)7-2-1-6-18(25)26/h3-5,12-14H,1-2,6-11H2,(H,25,26)/p-1/b16-12-/t13-,14+/m1/s1	432.105	NA	40816377	C20H23N3O4S2	59.0128:[C2H2O2+H]-;284.0316:[C11H13N2O3S2]-H-	1.6811501163145908	59.0128_188.8;284.0316_540.0	11	2
67.59315568442764	0.3797	InChI=1S/C25H21ClN2OS/c26-23-9-8-19-10-12-28-13-11-22(19)25(23)30-16-17-4-6-20(7-5-17)24(29)21-3-1-2-18(14-21)15-27/h1-9,14,28H,10-13,16H2	432.106	3-[4-[(7-chloro-2,3,4,5-tetrahydro-1H-3-benzazepin-6-yl)sulfanylmethyl]benzoyl]benzonitrile	11248382	C25H21ClN2OS	285.0404:[C16H15ClNS-2H]-H-	1.3076723892412323	285.0404_999.0	11	1
67.59315568442764	0.3797	InChI=1S/C25H21ClN2OS/c26-23-10-9-19-11-13-28-14-12-22(19)25(23)30-16-18-3-7-21(8-4-18)24(29)20-5-1-17(15-27)2-6-20/h1-10,28H,11-14,16H2	432.106	4-[4-[(7-chloro-2,3,4,5-tetrahydro-1H-3-benzazepin-6-yl)sulfanylmethyl]benzoyl]benzonitrile	57656072	C25H21ClN2OS	285.0404:[C16H15ClNS-2H]-H-	1.3076723892412323	285.0404_999.0	11	1
8.71489241491041	0.3792	InChI=1S/C25H20O5S/c1-2-28-25(27)30-24-23(20-10-6-7-11-22(20)31-24)29-16-21(26)19-14-12-18(13-15-19)17-8-4-3-5-9-17/h3-15H,2,16H2,1H3	432.103	ethyl [3-[2-oxo-2-(4-phenylphenyl)ethoxy]benzothiophen-2-yl] carbonate	69121295	C25H20O5S	59.0128:[C2H2O2+H]-;89.0232:[C3H5O3]-;101.0236:[C4H5O3]-	5.522801281911093	59.0128_188.8;89.0232_90.6;101.0236_177.5	11	3
64.93203471962852	0.3791	InChI=1S/C18H15ClF2N8O/c19-10-1-4-29-14(10)18(30)28(7-12(20)21)16(26-29)11-2-3-27(11)17-13-9(5-22)6-23-15(13)24-8-25-17/h1,4,6,8,11-12,17,23H,2-3,7H2,(H,24,25)	432.103	4-[2-[5-chloro-3-(2,2-difluoroethyl)-4-oxo-pyrrolo[2,1-f][1,2,4]triazin-2-yl]azetidin-1-yl]-4,7-dihydro-1H-pyrrolo[2,3-d]pyrimidine-5-carbonitrile	123139089	C18H15ClF2N8O	191.0196:[C7H5ClF2N2+H]-;285.0404:[C13H10ClN5O-H]-H-	1.4889610752712445	191.0196_169.7;285.0404_999.0	11	2
51.31695104394412	0.3788	InChI=1S/C19H20ClF3N2O4/c1-29-17-5-2-11(6-15(17)20)8-24-18(28)14-7-12(19(21,22)23)3-4-16(14)25-13(9-26)10-27/h2-7,13,25-27H,8-10H2,1H3,(H,24,28)	432.106	N-[(3-chloro-4-methoxy-phenyl)methyl]-2-[[2-hydroxy-1-(hydroxymethyl)ethyl]amino]-5-(trifluoromethyl)benzamide	22467376	C19H20ClF3N2O4	205.073:[C9H8F3NO+2H]-;284.0316:[C13H10ClF2NO2]-H-	2.460641006732235	205.073_113.5;284.0316_540.0	11	2
63.31221760441225	0.3773	InChI=1S/C23H17FN4O2S/c1-15(29)28(20-10-3-2-8-18(20)24)23-26-17(14-31-23)11-12-21(30)27-19-9-4-6-16-7-5-13-25-22(16)19/h2-14H,1H3,(H,27,30)/b12-11-	432.106	(Z)-3-[2-(N-acetyl-2-fluoro-anilino)thiazol-4-yl]-N-(8-quinolyl)prop-2-enamide	99892443	C23H17FN4O2S	191.0196:[C10H8FNS-H]-H-;284.0316:[C14H10FN3OS-2H]-H-	1.5763059006520654	191.0196_169.7;284.0316_540.0	11	2
2.4966431022725177	0.3771	InChI=1S/C25H20O5S/c1-15-13-17(6-11-21(15)27)25-24(20-10-7-18(26)14-22(20)31-25)30-19-8-3-16(4-9-19)5-12-23(28)29-2/h3-14,26-27H,1-2H3	432.103	methyl 3-[4-[6-hydroxy-2-(4-hydroxy-3-methyl-phenyl)benzothiophen-3-yl]oxyphenyl]prop-2-enoate	123565040	C25H20O5S	59.0128:[C2H3O2]-	5.935444541833472	59.0128_188.8	11	1
7.879934509005687	0.3758	InChI=1S/C21H20O10/c22-18(23)12-4-6-14(20(26)27)16(10-12)30-8-2-1-3-9-31-17-11-13(19(24)25)5-7-15(17)21(28)29/h4-7,10-11H,1-3,8-9H2,(H,22,23)(H,24,25)(H,26,27)(H,28,29)	432.106	2-[5-(2,5-dicarboxyphenoxy)pentoxy]terephthalic acid	102335545	C21H20O10	101.0236:[C4H3O3+2H]-;125.0244:[C6H6O3]-H-	5.527849448049407	101.0236_177.5;125.0244_187.2	11	2
1.1899204479317167	0.3699	InChI=1S/C25H20O5S/c1-31-19-10-7-17(8-11-19)24(26)20(13-16-5-3-2-4-6-16)23(25(27)28)18-9-12-21-22(14-18)30-15-29-21/h2-12,14H,13,15H2,1H3,(H,27,28)/b23-20-	432.103	(Z)-2-(1,3-benzodioxol-5-yl)-3-benzyl-4-(4-methylsulfanylphenyl)-4-oxo-but-2-enoic acid	10526722	C25H20O5S	59.0128:[C2H2O2+H]-	5.912404046068175	59.0128_188.8	11	1
6.5306411267470414	0.3685	InChI=1S/C25H20O5S/c1-28-20-13-12-17(14-21(20)29-2)19(26)15-30-24-18-10-6-7-11-22(18)31-25(24)23(27)16-8-4-3-5-9-16/h3-14H,15H2,1-2H3	432.103	2-(2-benzoylbenzothiophen-3-yl)oxy-1-(3,4-dimethoxyphenyl)ethanone	11441845	C25H20O5S	59.0128:[C2H2O2+H]-;125.0244:[C6H6O3]-H-	5.5061427021287095	59.0128_188.8;125.0244_187.2	11	2
6.5306411267470414	0.3685	InChI=1S/C25H20O5S/c1-28-17-12-13-18(21(14-17)29-2)20(26)15-30-24-19-10-6-7-11-22(19)31-25(24)23(27)16-8-4-3-5-9-16/h3-14H,15H2,1-2H3	432.103	2-(2-benzoylbenzothiophen-3-yl)oxy-1-(2,4-dimethoxyphenyl)ethanone	11419064	C25H20O5S	59.0128:[C2H2O2+H]-;125.0244:[C6H6O3]-H-	5.5061427021287095	59.0128_188.8;125.0244_187.2	11	2
0.0	0.3663	InChI=1S/C25H20O5S/c26-22-20-11-5-6-12-21(20)31-15-25(22,13-16-7-1-3-9-18(16)23(27)28)14-17-8-2-4-10-19(17)24(29)30/h1-12H,13-15H2,(H,27,28)(H,29,30)	432.103	2-[[3-[(2-carboxyphenyl)methyl]-4-oxo-thiochroman-3-yl]methyl]benzoic acid	67298349	C25H20O5S	NA	5.9389941009862	NA	11	0
59.88359017233222	0.362	InChI=1S/C23H17FN4O2S/c1-13-21(17-4-2-3-5-18(17)25-13)19-12-31-23(27-19)28-20(29)10-16-11-30-22(26-16)14-6-8-15(24)9-7-14/h2-9,11-12,25H,10H2,1H3,(H,27,28,29)	432.106	2-[2-(4-fluorophenyl)oxazol-4-yl]-N-[4-(2-methyl-1H-indol-3-yl)thiazol-2-yl]acetamide	86946355	C23H17FN4O2S	284.0316:[C14H8FN3OS]-H-	1.5738390871222092	284.0316_540.0	11	1
58.554430581649676	0.3619	InChI=1S/C20H18FN3O5S/c1-24(2,30(27,28)29)18-14-4-3-9-22-17(14)19(25)16-15(18)11-23(20(16)26)10-12-5-7-13(21)8-6-12/h3-9H,10-11H2,1-2H3,(H-,25,26,27,28,29)/p+1	432.103	[7-[(4-fluorophenyl)methyl]-9-hydroxy-8-oxo-6H-pyrrolo[3,4-g]quinolin-5-yl]-dimethyl-sulfo-ammonium	91538306	C20H18FN3O5S	285.0404:[C10H10N3O5S+H]-	1.6670863635991229	285.0404_999.0	11	1
4.8675972202750835	0.3608	InChI=1S/C21H20O10/c1-6(22)12-16(26)10(17(27)13(7(2)23)20(12)30)5-11-18(28)14(8(3)24)21(31)15(9(4)25)19(11)29/h26-31H,5H2,1-4H3	432.106	1-[3-acetyl-5-[(3,5-diacetyl-2,4,6-trihydroxy-phenyl)methyl]-2,4,6-trihydroxy-phenyl]ethanone	21119957	C21H20O10	125.0244:[C6H5O3]-	5.501066578235764	125.0244_187.2	11	1
38.34607812952487	0.3592	InChI=1S/C18H20N6O3S2/c19-15-13-16(21-8-20-15)24(9-22-13)17-14(26)12(11(6-25)27-17)23-18(28)29-7-10-4-2-1-3-5-10/h1-5,8-9,11-12,14,17,25-26H,6-7H2,(H,23,28)(H2,19,20,21)/t11-,12+,14-,17+/m1/s1	432.104	benzyl N-[(2S,3R,4R,5S)-5-(6-aminopurin-9-yl)-4-hydroxy-2-(hydroxymethyl)tetrahydrofuran-3-yl]carbamodithioate	92236365	C18H20N6O3S2	59.0128:[C2H4O2]-H-;101.0236:[C4H7O3-H]-H-;284.0316:[C11H14N2O3S2-H]-H-	3.073147846867594	59.0128_188.8;101.0236_177.5;284.0316_540.0	11	3
55.37094290009355	0.3585	InChI=1S/C23H17FN4O2S/c24-17-13-16(8-9-18(17)27-23-28-19-6-1-2-7-20(19)31-23)30-22-21(25-10-11-26-22)14-4-3-5-15(29)12-14/h1-2,6-13H,3-5H2,(H,27,28)	432.106	3-[3-[4-(1,3-benzothiazol-2-ylamino)-3-fluoro-phenoxy]pyrazin-2-yl]cyclohex-2-en-1-one	59351315	C23H17FN4O2S	191.0196:[C10H5FNS+H]-;284.0316:[C14H8FN3OS]-H-	1.8400177379329026	191.0196_169.7;284.0316_540.0	11	2
54.271443526436784	0.3578	InChI=1S/C18H20N6O3S2/c1-10(2)8-24-14(19)13(15(26)21-17(24)27)12(25)9-28-18-23-22-16(29-18)20-11-6-4-3-5-7-11/h3-7,10H,8-9,19H2,1-2H3,(H,20,22)(H,21,26,27)	432.104	6-amino-5-[2-[(5-anilino-1,3,4-thiadiazol-2-yl)sulfanyl]acetyl]-1-isobutyl-pyrimidine-2,4-dione	42370683	C18H20N6O3S2	125.0244:[C4H3N3O2]-;284.0316:[C11H12N2O3S2]-	1.9079741318815067	125.0244_187.2;284.0316_540.0	11	2
59.71537267547607	0.357	InChI=1S/C23H17FN4O2S/c1-14-20(31-23(26-14)16-5-7-17(24)8-6-16)22(30)28-19-4-2-3-18(13-19)27-21(29)15-9-11-25-12-10-15/h2-13H,1H3,(H,27,29)(H,28,30)	432.106	2-(4-fluorophenyl)-4-methyl-N-[3-(pyridine-4-carbonylamino)phenyl]thiazole-5-carboxamide	55610573	C23H17FN4O2S	191.0196:[C10H7FNS]-H-;284.0316:[C14H10FN3OS-2H]-H-	1.5052419782350521	191.0196_169.7;284.0316_540.0	11	2
50.01708140649082	0.3563	InChI=1S/C20H21N3O4S2/c1-22-9-8-14-15(10-22)29-18-17(14)19(25)23(12-4-6-13(26-2)7-5-12)20(21-18)28-11-16(24)27-3/h4-7H,8-11H2,1-3H3/p+1	432.105	methyl 2-[[3-(4-methoxyphenyl)-7-methyl-4-oxo-5,6,7,8-tetrahydropyrido[2,3]thieno[2,4-b]pyrimidin-7-ium-2-yl]sulfanyl]acetate	40838489	C20H21N3O4S2	59.0128:[C2H3O2]-;284.0316:[C11H10N2O3S2+2H]-	2.189165757324223	59.0128_188.8;284.0316_540.0	11	2
56.30020663464755	0.3554	InChI=1S/C23H14F2N4O3/c1-11-19-20-18(10-26-21(19)29(27-11)17-8-14(24)7-15(25)9-17)22(31)28(23(20)32)16-5-3-13(4-6-16)12(2)30/h3-10H,1-2H3	432.103	NA	66508175	C23H14F2N4O3	285.0404:[C16H8N4O2-2H]-H-	1.7232305317760923	285.0404_999.0	11	1
56.30020663464755	0.3554	InChI=1S/C23H14F2N4O3/c1-11-19-20-16(10-26-21(19)29(27-11)18-8-5-14(24)9-17(18)25)22(31)28(23(20)32)15-6-3-13(4-7-15)12(2)30/h3-10H,1-2H3	432.103	NA	66506582	C23H14F2N4O3	285.0404:[C16H8N4O2-2H]-H-	1.7232305317760923	285.0404_999.0	11	1
56.30020663464755	0.3554	InChI=1S/C23H14F2N4O3/c1-11-19-20-16(10-26-21(19)29(27-11)15-7-8-17(24)18(25)9-15)22(31)28(23(20)32)14-5-3-13(4-6-14)12(2)30/h3-10H,1-2H3	432.103	NA	66506560	C23H14F2N4O3	285.0404:[C16H8N4O2-2H]-H-	1.7232305317760923	285.0404_999.0	11	1
62.65623625167441	0.3546	InChI=1S/C17H25ClN4O3S2/c1-2-20-5-7-21(8-6-20)17(26)19-16-13-14(3-4-15(16)18)27(23,24)22-9-11-25-12-10-22/h3-4,13H,2,5-12H2,1H3,(H,19,26)	432.106	N-(2-chloro-5-morpholinosulfonyl-phenyl)-4-ethyl-piperazine-1-carbothioamide	24423514	C17H25ClN4O3S2	284.0316:[C11H12N2O3S2]-	1.254439116456949	284.0316_540.0	11	1
62.20342031049626	0.3535	InChI=1S/C18H20N6O3S2/c1-19-29(26,27)12-8-14(28-9-12)17(25)24-7-6-23(10-18(24)3-4-18)16-13-2-5-20-15(13)21-11-22-16/h2,5,8-9,11,19H,3-4,6-7,10H2,1H3,(H,20,21,22)	432.104	N-methyl-5-[7-(7H-pyrrolo[2,3-d]pyrimidin-4-yl)-4,7-diazaspiro[2.5]octane-4-carbonyl]thiophene-3-sulfonamide	57480409	C18H20N6O3S2	284.0316:[C11H12N2O3S2]-	1.2698417591607325	284.0316_540.0	11	1
43.427279608542136	0.3533	InChI=1S/C23H17FN4O2S/c24-15-9-7-14(8-10-15)19-12-25-22(28(19)13-16-4-3-11-30-16)20(31)21-26-18-6-2-1-5-17(18)23(29)27-21/h1-12,20,31H,13H2,(H,26,27,29)	432.106	2-[[5-(4-fluorophenyl)-1-(2-furylmethyl)imidazol-2-yl]-sulfanyl-methyl]-1H-quinazolin-4-one	22298634	C23H17FN4O2S	191.0196:[C10H7FNS]-H-;284.0316:[C14H8FN3OS]-H-	2.613055236303317	191.0196_169.7;284.0316_540.0	11	2
62.65623625167441	0.3531	InChI=1S/C17H25ClN4O3S2/c1-20-5-2-6-21(8-7-20)17(26)19-16-13-14(3-4-15(16)18)27(23,24)22-9-11-25-12-10-22/h3-4,13H,2,5-12H2,1H3,(H,19,26)	432.106	N-(2-chloro-5-morpholinosulfonyl-phenyl)-4-methyl-1,4-diazepane-1-carbothioamide	42993035	C17H25ClN4O3S2	284.0316:[C11H12N2O3S2]-	1.2301284284036798	284.0316_540.0	11	1
49.500937602736855	0.3529	InChI=1S/C22H19ClF2N2O3/c1-29-19-9-5-8-16(20(19)30-22(24)25)21(28)27-15-10-11-18(17(23)12-15)26-13-14-6-3-2-4-7-14/h2-12,22,26H,13H2,1H3,(H,27,28)	432.105	N-[4-(benzylamino)-3-chloro-phenyl]-2-(difluoromethoxy)-3-methoxy-benzamide	60257610	C22H19ClF2N2O3	205.073:[C11H9NO3+2H]-;284.0316:[C13H9ClF2NO2]-	2.1711505720657556	205.073_113.5;284.0316_540.0	11	2
57.45426694214625	0.3515	InChI=1S/C23H17FN4O2S/c24-15-7-5-14(6-8-15)18-13-31-22-19(18)23(29)28-20(25-22)16-3-1-2-4-17(16)21(26-28)27-9-11-30-12-10-27/h1-8,13H,9-12H2	432.106	NA	24048718	C23H17FN4O2S	191.0196:[C10H5FNS+H]-;205.073:[C9H8N4O2+H]-;284.0316:[C14H6FN3OS+H]-	1.5770493462493786	191.0196_169.7;205.073_113.5;284.0316_540.0	11	3
58.97071115413689	0.3515	InChI=1S/C23H17FN4O2S/c1-14-20(15-7-9-18(24)10-8-15)27-23(31-14)28-21(29)16-4-2-6-19(12-16)26-22(30)17-5-3-11-25-13-17/h2-13H,1H3,(H,26,30)(H,27,28,29)	432.106	N-[3-[[4-(4-fluorophenyl)-5-methyl-thiazol-2-yl]carbamoyl]phenyl]pyridine-3-carboxamide	36203943	C23H17FN4O2S	191.0196:[C10H7FNS]-H-;284.0316:[C14H9FN3OS-H]-H-	1.4686807480315511	191.0196_169.7;284.0316_540.0	11	2
7.304563694319018	0.3512	InChI=1S/C25H20O5S/c26-19(23-12-16-8-4-5-9-22(16)31-23)11-10-17-18-13-24(27)29-21(18)14-20(17)30-25(28)15-6-2-1-3-7-15/h1-12,17-18,20-21H,13-14H2/b11-10+	432.103	[4-[(E)-3-(benzothiophen-2-yl)-3-oxo-prop-1-enyl]-2-oxo-3,3a,4,5,6,6a-hexahydrocyclopenta[b]furan-5-yl] benzoate	87232070	C25H20O5S	59.0128:[C2H2O2+H]-;125.0244:[C6H7O3-H]-H-	5.170666180907398	59.0128_188.8;125.0244_187.2	11	2
12.015317226965777	0.351	InChI=1S/C25H20O5S/c26-21-22(30-25(27)29-17-16-28-20-14-8-3-9-15-20)24(19-12-6-2-7-13-19)31-23(21)18-10-4-1-5-11-18/h1-15,26H,16-17H2	432.103	(4-hydroxy-2,5-diphenyl-3-thienyl) 2-phenoxyethyl carbonate	57149422	C25H20O5S	59.0128:[C2H4O2]-H-;89.0232:[C3H4O3+H]-;101.0236:[C4H4O3+H]-;125.0244:[C6H6O3]-H-	4.82937029825235	59.0128_188.8;89.0232_90.6;101.0236_177.5;125.0244_187.2	11	4
57.669007401677504	0.3485	InChI=1S/C23H17FN4O2S/c1-14-20(31-23(26-14)15-7-9-17(24)10-8-15)22(30)28-19-6-2-5-18(12-19)27-21(29)16-4-3-11-25-13-16/h2-13H,1H3,(H,27,29)(H,28,30)	432.106	2-(4-fluorophenyl)-4-methyl-N-[3-(pyridine-3-carbonylamino)phenyl]thiazole-5-carboxamide	46400435	C23H17FN4O2S	191.0196:[C10H7FNS]-H-;284.0316:[C14H9FN3OS-H]-H-	1.5126915386334387	191.0196_169.7;284.0316_540.0	11	2
49.500937602736855	0.3473	InChI=1S/C22H19ClF2N2O3/c1-29-20-11-15(7-10-19(20)30-22(24)25)21(28)27-16-8-9-18(17(23)12-16)26-13-14-5-3-2-4-6-14/h2-12,22,26H,13H2,1H3,(H,27,28)	432.105	N-[4-(benzylamino)-3-chloro-phenyl]-4-(difluoromethoxy)-3-methoxy-benzamide	56184624	C22H19ClF2N2O3	205.073:[C11H9NO3+2H]-;284.0316:[C13H9ClF2NO2]-	2.0792724022745337	205.073_113.5;284.0316_540.0	11	2
53.609122195453786	0.3458	InChI=1S/C17H24F4O4S2/c18-12-14(20)17(27-25-24-23)15(21)13(19)16(12)26-11-9-7-5-3-1-2-4-6-8-10-22/h22-23H,1-11H2	432.105	11-[2,3,5,6-tetrafluoro-4-(trioxidanylsulfanyl)phenyl]sulfanylundecan-1-ol	58961987	C17H24F4O4S2	284.0316:[C11H10F4S2+2H]-	1.760161379339941	284.0316_540.0	11	1
58.17411991510804	0.3436	InChI=1S/C18H20N6O3S2/c25-17(22-29(26,27)14-2-1-9-28-14)24-8-7-23(10-18(11-24)4-5-18)16-13-3-6-19-15(13)20-12-21-16/h1-3,6,9,12H,4-5,7-8,10-11H2,(H,22,25)(H,19,20,21)	432.104	5-(7H-pyrrolo[2,3-d]pyrimidin-4-yl)-N-(2-thienylsulfonyl)-5,8-diazaspiro[2.6]nonane-8-carboxamide	123581810	C18H20N6O3S2	284.0316:[C11H14N2O3S2-H]-H-	1.3971134383550967	284.0316_540.0	11	1
58.17411991510804	0.3436	InChI=1S/C18H20N6O3S2/c25-17(22-29(26,27)13-2-8-28-9-13)24-7-6-23(10-18(11-24)3-4-18)16-14-1-5-19-15(14)20-12-21-16/h1-2,5,8-9,12H,3-4,6-7,10-11H2,(H,22,25)(H,19,20,21)	432.104	5-(7H-pyrrolo[2,3-d]pyrimidin-4-yl)-N-(3-thienylsulfonyl)-5,8-diazaspiro[2.6]nonane-8-carboxamide	123184608	C18H20N6O3S2	284.0316:[C11H14N2O3S2-H]-H-	1.3971134383550967	284.0316_540.0	11	1
2.4966431022725177	0.3432	InChI=1S/C25H20O5S/c1-28-19-11-6-17(7-12-19)25-24(21-13-8-18(26)15-22(21)31-25)30-20-9-3-16(4-10-20)5-14-23(27)29-2/h3-15,26H,1-2H3/b14-5+	432.103	methyl (E)-3-[4-[6-hydroxy-2-(4-methoxyphenyl)benzothiophen-3-yl]oxyphenyl]prop-2-enoate	86730679	C25H20O5S	59.0128:[C2H3O2]-	5.385580654454048	59.0128_188.8	11	1
2.4966431022725177	0.3432	InChI=1S/C25H20O5S/c1-28-20-12-13-21-22(15-20)31-25(17-6-8-18(26)9-7-17)24(21)30-19-10-3-16(4-11-19)5-14-23(27)29-2/h3-15,26H,1-2H3/b14-5+	432.103	methyl (E)-3-[4-[2-(4-hydroxyphenyl)-6-methoxy-benzothiophen-3-yl]oxyphenyl]prop-2-enoate	86730678	C25H20O5S	59.0128:[C2H3O2]-	5.385580654454048	59.0128_188.8	11	1
1.6922696542693398	0.3406	InChI=1S/C25H20O5S/c26-22-20-13-7-8-14-21(20)31-17-25(22,15-29-23(27)18-9-3-1-4-10-18)16-30-24(28)19-11-5-2-6-12-19/h1-14H,15-17H2	432.103	[3-(benzoyloxymethyl)-4-oxo-thiochroman-3-yl]methyl benzoate	1478541	C25H20O5S	59.0128:[C2H2O2+H]-	5.401322285670775	59.0128_188.8	11	1
1.7833357325690724	0.34	InChI=1S/C25H20O5S/c1-28-18-10-6-17(7-11-18)25-24(21-13-12-20(29-2)15-22(21)31-25)30-19-8-3-16(4-9-19)5-14-23(26)27/h3-15H,1-2H3,(H,26,27)	432.103	3-[4-[6-methoxy-2-(4-methoxyphenyl)benzothiophen-3-yl]oxyphenyl]prop-2-enoic acid	124023370	C25H20O5S	59.0128:[C2H2O2+H]-	5.385580654454048	59.0128_188.8	11	1
41.9428243544667	0.3376	InChI=1S/C22H19ClF2N2O3/c1-22(2,29)14-6-5-13(17(23)10-14)12-27-20(28)16-4-3-9-26-21(16)30-15-7-8-18(24)19(25)11-15/h3-11,29H,12H2,1-2H3,(H,27,28)	432.105	N-[[2-chloro-4-(1-hydroxy-1-methyl-ethyl)phenyl]methyl]-2-(3,4-difluorophenoxy)pyridine-3-carboxamide	22612085	C22H19ClF2N2O3	191.0196:[C10H5F2NO-H]-H-;284.0316:[C13H7ClF2NO2+2H]-	2.464465772784558	191.0196_169.7;284.0316_540.0	11	2
44.62067210496676	0.3374	InChI=1S/C23H17FN4O2S/c24-17-5-8-21-20(10-17)28-23(31-21)19(11-25)22(29)27-13-15-3-6-18(7-4-15)30-14-16-2-1-9-26-12-16/h1-10,12,19H,13-14H2,(H,27,29)/t19-/m0/s1	432.106	(2S)-2-cyano-2-(5-fluoro-1,3-benzothiazol-2-yl)-N-[[4-(3-pyridylmethoxy)phenyl]methyl]acetamide	97252934	C23H17FN4O2S	284.0316:[C14H9FN3OS-H]-H-	2.2704152119464025	284.0316_540.0	11	1
58.17411991510804	0.3364	InChI=1S/C18H20N6O3S2/c19-29(26,27)15-2-1-12(28-15)9-14(25)24-8-7-23(10-18(24)4-5-18)17-13-3-6-20-16(13)21-11-22-17/h1-3,6,11H,4-5,7-10H2,(H2,19,26,27)(H,20,21,22)	432.104	5-[2-oxo-2-[7-(7H-pyrrolo[2,3-d]pyrimidin-4-yl)-4,7-diazaspiro[2.5]octan-4-yl]ethyl]thiophene-2-sulfonamide	57477385	C18H20N6O3S2	284.0316:[C11H14N2O3S2-H]-H-	1.2809674018612782	284.0316_540.0	11	1
58.17411991510804	0.3356	InChI=1S/C18H20N6O3S2/c1-11-14(29(19,26)27)8-13(28-11)17(25)24-7-6-23(9-18(24)3-4-18)16-12-2-5-20-15(12)21-10-22-16/h2,5,8,10H,3-4,6-7,9H2,1H3,(H2,19,26,27)(H,20,21,22)	432.104	2-methyl-5-[7-(7H-pyrrolo[2,3-d]pyrimidin-4-yl)-4,7-diazaspiro[2.5]octane-4-carbonyl]thiophene-3-sulfonamide	66888507	C18H20N6O3S2	284.0316:[C11H14N2O3S2-H]-H-	1.26748167883904	284.0316_540.0	11	1
7.304563694319018	0.3354	InChI=1S/C25H20O5S/c26-19(23-12-16-8-4-5-9-22(16)31-23)11-10-17-18-13-24(27)29-21(18)14-20(17)30-25(28)15-6-2-1-3-7-15/h1-10,12,18,20-21H,11,13-14H2/t18-,20-,21+/m1/s1	432.103	[(3aR,5R,6aS)-4-[3-(benzothiophen-2-yl)-3-oxo-propylidene]-2-oxo-3a,5,6,6a-tetrahydro-3H-cyclopenta[b]furan-5-yl] benzoate	91517124	C25H20O5S	59.0128:[C2H2O2+H]-;125.0244:[C6H7O3-H]-H-	4.914402375972781	59.0128_188.8;125.0244_187.2	11	2
31.91452723273514	0.3321	InChI=1S/C22H19ClF2N2O3/c1-4-14(6-5-13(3)23)20-26-18(15-10-17(25)16(24)9-12(15)2)11-19(27-20)30-22(7-8-22)21(28)29/h4-6,9-11H,1,7-8H2,2-3H3,(H,28,29)/b13-5+,14-6+	432.105	1-[2-[(1E,3E)-4-chloro-1-vinyl-penta-1,3-dienyl]-6-(4,5-difluoro-2-methyl-phenyl)pyrimidin-4-yl]oxycyclopropanecarboxylic acid	89143060	C22H19ClF2N2O3	89.0232:[C3H3O3+2H]-;101.0236:[C4H5O3]-;125.0244:[C6H6O3]-H-;191.0196:[C10H6F2NO-2H]-H-;205.073:[C11H10NO3+H]-	3.0955213247693734	89.0232_90.6;101.0236_177.5;125.0244_187.2;191.0196_169.7;205.073_113.5	11	5
58.17411991510804	0.3317	InChI=1S/C18H20N6O3S2/c19-29(26,27)14-7-12(8-28-14)17(25)24-6-5-23(9-18(10-24)2-3-18)16-13-1-4-20-15(13)21-11-22-16/h1,4,7-8,11H,2-3,5-6,9-10H2,(H2,19,26,27)(H,20,21,22)	432.104	4-[5-(7H-pyrrolo[2,3-d]pyrimidin-4-yl)-5,8-diazaspiro[2.6]nonane-8-carbonyl]thiophene-2-sulfonamide	56644357	C18H20N6O3S2	284.0316:[C11H14N2O3S2-H]-H-	1.204039551235835	284.0316_540.0	11	1
58.17411991510804	0.3317	InChI=1S/C18H20N6O3S2/c19-29(26,27)12-7-14(28-8-12)17(25)24-6-5-23(9-18(10-24)2-3-18)16-13-1-4-20-15(13)21-11-22-16/h1,4,7-8,11H,2-3,5-6,9-10H2,(H2,19,26,27)(H,20,21,22)	432.104	5-[5-(7H-pyrrolo[2,3-d]pyrimidin-4-yl)-5,8-diazaspiro[2.6]nonane-8-carbonyl]thiophene-3-sulfonamide	56644145	C18H20N6O3S2	284.0316:[C11H14N2O3S2-H]-H-	1.204039551235835	284.0316_540.0	11	1
4.8675972202750835	0.3302	InChI=1S/C21H20O10/c22-18(23)12-6-13(19(24)25)9-16(8-12)30-4-2-1-3-5-31-17-10-14(20(26)27)7-15(11-17)21(28)29/h6-11H,1-5H2,(H,22,23)(H,24,25)(H,26,27)(H,28,29)	432.106	5-[5-(3,5-dicarboxyphenoxy)pentoxy]benzene-1,3-dicarboxylic acid	101905057	C21H20O10	125.0244:[C6H6O3]-H-	5.004611391672058	125.0244_187.2	11	1
50.60425334240718	0.3295	InChI=1S/C23H17FN4O2S/c1-13-3-4-14(2)28(13)19-7-8-31-23(19)18-10-21(27-26-18)25-22-15(11-29)12-30-20-6-5-16(24)9-17(20)22/h3-12H,1-2H3,(H,26,27)	432.106	4-[[5-[3-(2,5-dimethylpyrrol-1-yl)-2-thienyl]-1H-pyrazol-3-yl]imino]-6-fluoro-chromene-3-carbaldehyde	1477759	C23H17FN4O2S	284.0316:[C14H7FN3OS]-	1.7129714964106306	284.0316_540.0	11	1
54.86273018007973	0.3267	InChI=1S/C23H17FN4O2S/c24-20-12-16(14-25)6-11-19(20)22(30)28-23(31)27-18-9-7-17(8-10-18)26-21(29)13-15-4-2-1-3-5-15/h1-12H,13H2,(H,26,29)(H2,27,28,30,31)	432.106	4-cyano-2-fluoro-N-[[4-[(2-phenylacetyl)amino]phenyl]carbamothioyl]benzamide	5080503	C23H17FN4O2S	284.0316:[C14H10FN3OS-2H]-H-	1.3617557693589684	284.0316_540.0	11	1
53.99294474875343	0.3234	InChI=1S/C23H17FN4O2S/c1-2-31(29,30)18-9-6-15(7-10-18)19-12-16(8-11-21(19)24)20-13-26-27-23-22(20)25-14-28(23)17-4-3-5-17/h3-14H,2H2,1H3	432.106	7-(cyclobutadienyl)-4-[3-(4-ethylsulfonylphenyl)-4-fluoro-phenyl]imidazo[4,5-c]pyridazine	90218055	C23H17FN4O2S	285.0404:[C16H12FO2S-H]-H-	1.3705731571216995	285.0404_999.0	11	1
43.427279608542136	0.3232	InChI=1S/C23H17FN4O2S/c24-16-9-7-15(8-10-16)20-12-25-23(28(20)13-17-4-3-11-30-17)31-14-21-26-19-6-2-1-5-18(19)22(29)27-21/h1-12H,13-14H2,(H,26,27,29)	432.106	2-[[5-(4-fluorophenyl)-1-(2-furylmethyl)imidazol-2-yl]sulfanylmethyl]-1H-quinazolin-4-one	645074	C23H17FN4O2S	191.0196:[C10H7FNS]-H-;284.0316:[C14H8FN3OS]-H-	2.1256433350135215	191.0196_169.7;284.0316_540.0	11	2
48.68207616869644	0.3218	InChI=1S/C18H20N6O3S2/c1-4-27-15(26)7-13-9-28-17(22-13)23-14(25)6-12-8-29-18(21-12)24-16-19-10(2)5-11(3)20-16/h5,8-9H,4,6-7H2,1-3H3,(H,22,23,25)(H,19,20,21,24)	432.104	ethyl 2-[2-[[2-[2-[(4,6-dimethylpyrimidin-2-yl)amino]thiazol-4-yl]acetyl]amino]thiazol-4-yl]acetate	49677940	C18H20N6O3S2	59.0128:[C2H2O2+H]-;284.0316:[C11H12N2O3S2]-	1.7250524681567727	59.0128_188.8;284.0316_540.0	11	2
49.80278824974007	0.3215	InChI=1S/C23H17FN4O2S/c1-15-2-4-16(5-3-15)21(30)14-31-23-25-12-10-19(26-23)22-20(29)11-13-28(27-22)18-8-6-17(24)7-9-18/h2-13H,14H2,1H3	432.106	1-(4-fluorophenyl)-3-[2-[2-oxo-2-(p-tolyl)ethyl]sulfanylpyrimidin-4-yl]pyridazin-4-one	2744387	C23H17FN4O2S	284.0316:[C14H8FN3OS]-H-	1.6402298083201525	284.0316_540.0	11	1
56.285279926670874	0.3202	InChI=1S/C20H19Cl2FN6/c1-12-9-14(3-4-15(12)23)16-10-17(27-20(22)26-16)29-8-7-28(11-13(29)2)19-18(21)24-5-6-25-19/h3-6,9-10,13H,7-8,11H2,1-2H3	432.103	2-chloro-4-[4-(3-chloropyrazin-2-yl)-2-methyl-piperazin-1-yl]-6-(4-fluoro-3-methyl-phenyl)pyrimidine	91217684	C20H19Cl2FN6	285.0404:[C10H9Cl2N6+2H]-	1.154561898364815	285.0404_999.0	11	1
7.307408213421898	0.3201	InChI=1S/C21H20O10/c1-12(22)28-18-5-16(6-19(9-18)29-13(2)23)26-11-27-17-7-20(30-14(3)24)10-21(8-17)31-15(4)25/h5-10H,11H2,1-4H3	432.106	[3-acetoxy-5-[(3,5-diacetoxyphenoxy)methoxy]phenyl] acetate	101710403	C21H20O10	59.0128:[C2H3O2]-;125.0244:[C6H5O3]-	4.665916325377463	59.0128_188.8;125.0244_187.2	11	2
56.285279926670874	0.3197	InChI=1S/C20H19Cl2FN6/c1-12-9-14(3-4-15(12)23)16-10-17(21)27-20(26-16)29-8-7-28(11-13(29)2)19-18(22)24-5-6-25-19/h3-6,9-10,13H,7-8,11H2,1-2H3	432.103	4-chloro-2-[4-(3-chloropyrazin-2-yl)-2-methyl-piperazin-1-yl]-6-(4-fluoro-3-methyl-phenyl)pyrimidine	91417384	C20H19Cl2FN6	285.0404:[C10H9Cl2N6+2H]-	1.1460016123800596	285.0404_999.0	11	1
46.41874530239055	0.3168	InChI=1S/C23H17FN4O2S/c1-30-17-12-10-16(11-13-17)27-21(29)18-7-3-5-9-20(18)28-22(27)25-26-23(28)31-14-15-6-2-4-8-19(15)24/h2-13H,14H2,1H3	432.106	1-[(2-fluorophenyl)methylsulfanyl]-4-(4-methoxyphenyl)-[1,2,4]triazolo[4,3-a]quinazolin-5-one	16248803	C23H17FN4O2S	191.0196:[C10H7FNS]-H-;284.0316:[C14H8FN3OS]-H-	1.8059181274704217	191.0196_169.7;284.0316_540.0	11	2
46.41874530239055	0.3168	InChI=1S/C23H17FN4O2S/c1-30-18-12-10-17(11-13-18)27-21(29)19-4-2-3-5-20(19)28-22(27)25-26-23(28)31-14-15-6-8-16(24)9-7-15/h2-13H,14H2,1H3	432.106	1-[(4-fluorophenyl)methylsulfanyl]-4-(4-methoxyphenyl)-[1,2,4]triazolo[4,3-a]quinazolin-5-one	4828641	C23H17FN4O2S	191.0196:[C10H7FNS]-H-;284.0316:[C14H8FN3OS]-H-	1.8059181274704217	191.0196_169.7;284.0316_540.0	11	2
46.41874530239055	0.3168	InChI=1S/C23H17FN4O2S/c1-30-18-6-4-5-17(13-18)27-21(29)19-7-2-3-8-20(19)28-22(27)25-26-23(28)31-14-15-9-11-16(24)12-10-15/h2-13H,14H2,1H3	432.106	1-[(4-fluorophenyl)methylsulfanyl]-4-(3-methoxyphenyl)-[1,2,4]triazolo[4,3-a]quinazolin-5-one	16260798	C23H17FN4O2S	191.0196:[C10H7FNS]-H-;284.0316:[C14H8FN3OS]-H-	1.8059181274704217	191.0196_169.7;284.0316_540.0	11	2
46.41874530239055	0.3168	InChI=1S/C23H17FN4O2S/c1-30-18-9-5-8-17(13-18)27-21(29)19-10-2-3-11-20(19)28-22(27)25-26-23(28)31-14-15-6-4-7-16(24)12-15/h2-13H,14H2,1H3	432.106	1-[(3-fluorophenyl)methylsulfanyl]-4-(3-methoxyphenyl)-[1,2,4]triazolo[4,3-a]quinazolin-5-one	16506779	C23H17FN4O2S	191.0196:[C10H7FNS]-H-;284.0316:[C14H8FN3OS]-H-	1.8059181274704217	191.0196_169.7;284.0316_540.0	11	2
54.0073944573378	0.3164	InChI=1S/C18H20N6O3S2/c25-16(13-28-18-20-17-19-7-4-8-24(17)21-18)22-9-11-23(12-10-22)29(26,27)14-15-5-2-1-3-6-15/h1-8H,9-14H2	432.104	1-(4-benzylsulfonylpiperazin-1-yl)-2-([1,2,4]triazolo[1,5-a]pyrimidin-2-ylsulfanyl)ethanone	24578527	C18H20N6O3S2	284.0316:[C11H13N2O3S2]-H-	1.255280856150109	284.0316_540.0	11	1
49.89238055150762	0.3161	InChI=1S/C19H23F3O4SSi/c1-18(2,3)28(4,5)26-16-11-9-14(10-12-16)15-7-6-8-17(13-15)25-27(23,24)19(20,21)22/h6-13H,1-5H3	432.104	[3-[4-[tert-butyl(dimethyl)silyl]oxyphenyl]phenyl] trifluoromethanesulfonate	88143069	C19H23F3O4SSi	284.0316:[C13H8F2O3S+2H]-	1.5452300213638446	284.0316_540.0	11	1
48.88725577603415	0.3155	InChI=1S/C23H17FN4O2S/c24-16-5-3-6-18(13-16)28-11-10-17(26-28)15-31-23-25-21-9-2-1-8-20(21)22(29)27(23)14-19-7-4-12-30-19/h1-13H,14-15H2	432.106	2-[[1-(3-fluorophenyl)pyrazol-3-yl]methylsulfanyl]-3-(2-furylmethyl)quinazolin-4-one	56252396	C23H17FN4O2S	191.0196:[C10H8FNS-H]-H-;284.0316:[C14H8FN3OS]-H-	1.6083416388645844	191.0196_169.7;284.0316_540.0	11	2
50.88847591969116	0.3152	InChI=1S/C23H17FN4O2S/c1-14-19(22-26-21(27-30-22)18-11-6-12-31-18)20(15-7-3-2-4-8-15)25-23(29)28(14)17-10-5-9-16(24)13-17/h2-13,20H,1H3,(H,25,29)	432.106	3-(3-fluorophenyl)-4-methyl-6-phenyl-5-[3-(2-thienyl)-1,2,4-oxadiazol-5-yl]-1,6-dihydropyrimidin-2-one	44102864	C23H17FN4O2S	284.0316:[C14H7FN3OS]-	1.4595054188136465	284.0316_540.0	11	1
50.88847591969116	0.3152	InChI=1S/C23H17FN4O2S/c1-14-19(22-26-21(27-30-22)18-8-5-13-31-18)20(15-6-3-2-4-7-15)25-23(29)28(14)17-11-9-16(24)10-12-17/h2-13,20H,1H3,(H,25,29)	432.106	3-(4-fluorophenyl)-4-methyl-6-phenyl-5-[3-(2-thienyl)-1,2,4-oxadiazol-5-yl]-1,6-dihydropyrimidin-2-one	44102865	C23H17FN4O2S	284.0316:[C14H7FN3OS]-	1.4595054188136465	284.0316_540.0	11	1
47.55906179057438	0.3143	InChI=1S/C23H17FN4O2S/c24-15-7-5-14(6-8-15)22(30)28-11-9-17-16-3-1-2-4-19(16)26-20(17)18(13-28)21(29)27-23-25-10-12-31-23/h1-8,10,12-13,26H,9,11H2,(H,25,27,29)	432.106	3-(4-fluorobenzoyl)-N-thiazol-2-yl-2,6-dihydro-1H-azepino[4,5-b]indole-5-carboxamide	87086831	C23H17FN4O2S	284.0316:[C14H9FN3OS-H]-H-	1.6844403789670088	284.0316_540.0	11	1
47.23385531236487	0.311	InChI=1S/C25H21ClN2OS/c1-17-9-11-18(12-10-17)13-14-27-25(29)22-16-24(28-23-8-3-2-7-21(22)23)30-20-6-4-5-19(26)15-20/h2-12,15-16H,13-14H2,1H3,(H,27,29)	432.106	2-(3-chlorophenyl)sulfanyl-N-[2-(p-tolyl)ethyl]quinoline-4-carboxamide	4576750	C25H21ClN2OS	284.0316:[C16H9ClNS+2H]-	1.6542955574371543	284.0316_540.0	11	1
47.23385531236487	0.311	InChI=1S/C25H21ClN2OS/c1-17-10-12-18(13-11-17)14-15-27-25(29)20-16-24(28-22-8-4-2-6-19(20)22)30-23-9-5-3-7-21(23)26/h2-13,16H,14-15H2,1H3,(H,27,29)	432.106	2-(2-chlorophenyl)sulfanyl-N-[2-(p-tolyl)ethyl]quinoline-4-carboxamide	4249991	C25H21ClN2OS	284.0316:[C16H9ClNS+2H]-	1.6542955574371543	284.0316_540.0	11	1
47.23385531236487	0.3104	InChI=1S/C25H21ClN2OS/c1-2-17-10-12-18(13-11-17)16-27-25(29)22-15-24(28-23-9-4-3-8-21(22)23)30-20-7-5-6-19(26)14-20/h3-15H,2,16H2,1H3,(H,27,29)	432.106	2-(3-chlorophenyl)sulfanyl-N-[(4-ethylphenyl)methyl]quinoline-4-carboxamide	4574004	C25H21ClN2OS	284.0316:[C16H9ClNS+2H]-	1.6439615456668404	284.0316_540.0	11	1
47.748715513028294	0.3099	InChI=1S/C23H17FN4O2S/c24-18-9-3-1-6-15(18)14-31-23-26-22-21(27-28-23)17-8-2-4-10-19(17)25-20(30-22)12-11-16-7-5-13-29-16/h1-13,20,25H,14H2/b12-11-/t20-/m1/s1	432.106	(6R)-3-[(2-fluorophenyl)methylsulfanyl]-6-[(Z)-2-(2-furyl)vinyl]-6,7-dihydro-[1,2,4]triazino[5,6-d][3,1]benzoxazepine	93474029	C23H17FN4O2S	205.073:[C9H7N4O2+2H]-;284.0316:[C14H9FN3OS-H]-H-	1.5986867839619636	205.073_113.5;284.0316_540.0	11	2
24.106742191977013	0.3066	InChI=1S/C22H19ClF2N2O3/c23-14-3-1-12(2-4-14)9-13-10-18(22(29)27-17-7-8-30-11-19(17)28)26-21-16(25)6-5-15(24)20(13)21/h1-6,10,17,19,28H,7-9,11H2,(H,27,29)	432.105	4-[(4-chlorophenyl)methyl]-5,8-difluoro-N-(3-hydroxytetrahydropyran-4-yl)quinoline-2-carboxamide	67322273	C22H19ClF2N2O3	59.0128:[C2H4O2]-H-;191.0196:[C10H3F2NO]-;205.073:[C11H13NO3-H]-H-	3.241888941162541	59.0128_188.8;191.0196_169.7;205.073_113.5	11	3
47.26233160040242	0.3065	InChI=1S/C18H20N6O3S2/c1-3-27-15(26)14-11(2)20-18(29-14)24(9-12-7-5-4-6-8-12)13(25)10-28-17-21-16(19)22-23-17/h4-8H,3,9-10H2,1-2H3,(H3,19,21,22,23)	432.104	ethyl 2-[[2-[(5-amino-1H-1,2,4-triazol-3-yl)sulfanyl]acetyl]-benzyl-amino]-4-methyl-thiazole-5-carboxylate	2530527	C18H20N6O3S2	59.0128:[C2H2O2+H]-;284.0316:[C11H12N2O3S2]-	1.5782682695356114	59.0128_188.8;284.0316_540.0	11	2
48.66126791573181	0.306	InChI=1S/C23H17FN4O2S/c24-18-10-8-16(9-11-18)20-22(27-21(30)17-4-2-1-3-5-17)31-23(26-20)28-25-14-15-6-12-19(29)13-7-15/h1-14,25H,(H,26,28)(H,27,30)	432.106	N-[4-(4-fluorophenyl)-2-[2-[(4-oxocyclohexa-2,5-dien-1-ylidene)methyl]hydrazino]thiazol-5-yl]benzamide	16436848	C23H17FN4O2S	284.0316:[C14H9FN3OS-H]-H-	1.470550453872074	284.0316_540.0	11	1
46.76953634906785	0.3054	InChI=1S/C18H20N6O3S2/c25-13(23-24-14(26)18(20-16(24)27)9-5-2-6-10-18)11-28-17-22-21-15(29-17)19-12-7-3-1-4-8-12/h1,3-4,7-8H,2,5-6,9-11H2,(H,19,21)(H,20,27)(H,23,25)	432.104	2-[(5-anilino-1,3,4-thiadiazol-2-yl)sulfanyl]-N-(2,4-dioxo-1,3-diazaspiro[4.5]decan-3-yl)acetamide	2567616	C18H20N6O3S2	101.0236:[C2H2N3O2+H]-;125.0244:[C4H3N3O2]-;284.0316:[C11H14N2O3S2-H]-H-	1.5967007277742709	101.0236_177.5;125.0244_187.2;284.0316_540.0	11	3
49.89238055150762	0.3048	InChI=1S/C18H20N6O3S2/c1-6-12-11(3)28-18(13(12)8-19)21-17(25)16-7-15(22-29(26,27)24(16)5)14-9-20-23(4)10(14)2/h7,9H,6H2,1-5H3,(H,21,25)	432.104	N-(3-cyano-4-ethyl-5-methyl-2-thienyl)-5-(1,5-dimethylpyrazol-4-yl)-2-methyl-1,1-dioxo-1,2,6-thiadiazine-3-carboxamide	46950732	C18H20N6O3S2	284.0316:[C11H13N2O3S2]-H-	1.3631560045732434	284.0316_540.0	11	1
47.955178868362104	0.3046	InChI=1S/C18H20N6O3S2/c1-3-27-15(26)9-13-11(2)20-17(29-13)21-14(25)10-28-18-23-22-16(24(18)19)12-7-5-4-6-8-12/h4-8H,3,9-10,19H2,1-2H3,(H,20,21,25)	432.104	ethyl 2-[2-[[2-[(4-amino-5-phenyl-1,2,4-triazol-3-yl)sulfanyl]acetyl]amino]-4-methyl-thiazol-5-yl]acetate	4129215	C18H20N6O3S2	59.0128:[C2H2O2+H]-;284.0316:[C11H13N2O3S2]-H-	1.499331104459608	59.0128_188.8;284.0316_540.0	11	2
42.25103045916	0.3036	InChI=1S/C23H17FN4O2S/c24-17-12-10-15(11-13-17)21-18-8-4-5-9-19(18)23(28-26-21)31-14-20(29)25-27-22(30)16-6-2-1-3-7-16/h1-13H,14H2,(H,25,29)(H,27,30)	432.106	N''-[2-[4-(4-fluorophenyl)phthalazin-1-yl]sulfanylacetyl]benzohydrazide	16273684	C23H17FN4O2S	284.0316:[C14H9FN3OS-H]-H-	1.8921754704959566	284.0316_540.0	11	1
48.673007576648544	0.2984	InChI=1S/C17H25ClN4O3S2/c1-4-19-17(22(3)11-14-8-13(18)10-21(14)2)20-9-15(23)12-27(24,25)16-6-5-7-26-16/h5-8,10,15,23H,4,9,11-12H2,1-3H3,(H,19,20)	432.106	1-[(4-chloro-1-methyl-pyrrol-2-yl)methyl]-3-ethyl-2-[2-hydroxy-3-(2-thienylsulfonyl)propyl]-1-methyl-guanidine	109712681	C17H25ClN4O3S2	191.0196:[C7H9O2S2+2H]-;284.0316:[C11H15N2O3S2-2H]-H-	1.346601156888352	191.0196_169.7;284.0316_540.0	11	2
45.235584402673844	0.2963	InChI=1S/C23H17FN4O2S/c1-14-20(12-26-28(14)17-7-5-16(24)6-8-17)22(29)19(11-25)23-27-21(13-31-23)15-3-9-18(30-2)10-4-15/h3-10,12-13,19H,1-2H3/t19-/m0/s1	432.106	(2S)-3-[1-(4-fluorophenyl)-5-methyl-pyrazol-4-yl]-2-[4-(4-methoxyphenyl)thiazol-2-yl]-3-oxo-propanenitrile	52750022	C23H17FN4O2S	284.0316:[C14H9FN3OS-H]-H-	1.5588433839471196	284.0316_540.0	11	1
46.25243364466793	0.2962	InChI=1S/C23H17FN4O2S/c1-14-20-17(24)8-5-9-18(20)31-21(14)22(29)25-16-7-4-6-15(12-16)13-28-23(30)27-11-3-2-10-19(27)26-28/h2-12H,13H2,1H3,(H,25,29)	432.106	4-fluoro-3-methyl-N-[3-[(3-oxo-[1,2,4]triazolo[4,3-a]pyridin-2-yl)methyl]phenyl]benzothiophene-2-carboxamide	55763136	C23H17FN4O2S	191.0196:[C10H7FNS]-H-;284.0316:[C14H10FN3OS-2H]-H-	1.4840743038818027	191.0196_169.7;284.0316_540.0	11	2
46.28065522680901	0.2948	InChI=1S/C23H17FN4O2S/c1-14-19(22-26-21(27-30-22)18-11-6-12-31-18)20(15-7-5-8-16(24)13-15)25-23(29)28(14)17-9-3-2-4-10-17/h2-13,20H,1H3,(H,25,29)	432.106	6-(3-fluorophenyl)-4-methyl-3-phenyl-5-[3-(2-thienyl)-1,2,4-oxadiazol-5-yl]-1,6-dihydropyrimidin-2-one	44103277	C23H17FN4O2S	284.0316:[C14H8FN3OS]-H-	1.4595054188136465	284.0316_540.0	11	1
46.28065522680901	0.2948	InChI=1S/C23H17FN4O2S/c1-14-19(22-26-21(27-30-22)18-8-5-13-31-18)20(15-9-11-16(24)12-10-15)25-23(29)28(14)17-6-3-2-4-7-17/h2-13,20H,1H3,(H,25,29)	432.106	6-(4-fluorophenyl)-4-methyl-3-phenyl-5-[3-(2-thienyl)-1,2,4-oxadiazol-5-yl]-1,6-dihydropyrimidin-2-one	44103552	C23H17FN4O2S	284.0316:[C14H8FN3OS]-H-	1.4595054188136465	284.0316_540.0	11	1
46.9898065144271	0.2932	InChI=1S/C18H20N6O3S2/c1-11-7-12(2)22-17(21-11)24-18-23-14(10-28-18)8-16(25)20-9-13-3-5-15(6-4-13)29(19,26)27/h3-7,10H,8-9H2,1-2H3,(H,20,25)(H2,19,26,27)(H,21,22,23,24)	432.104	2-[2-[(4,6-dimethylpyrimidin-2-yl)amino]thiazol-4-yl]-N-[(4-sulfamoylphenyl)methyl]acetamide	49737341	C18H20N6O3S2	284.0316:[C11H12N2O3S2]-	1.3837223541140145	284.0316_540.0	11	1
49.51505094037064	0.2913	InChI=1S/C23H17FN4O2S/c24-18-11-13-19(14-12-18)28-27-20(22(30)25-15-16-7-3-1-4-8-16)23(31-28)26-21(29)17-9-5-2-6-10-17/h1-14H,15H2,(H,25,30)	432.106	5-benzoylimino-N-benzyl-2-(4-fluorophenyl)thiadiazole-4-carboxamide	1499285	C23H17FN4O2S	284.0316:[C14H9FN3OS-H]-H-	1.171414629912949	284.0316_540.0	11	1
32.905714344373706	0.2911	InChI=1S/C20H15F3N4O4/c21-20(22,23)14-2-3-16(27-11-24-10-25-27)15(8-14)26-18(28)9-31-19(29)13-1-4-17-12(7-13)5-6-30-17/h1-4,7-8,10-11H,5-6,9H2,(H,26,28)	432.105	[2-oxo-2-[2-(1,2,4-triazol-1-yl)-5-(trifluoromethyl)anilino]ethyl] 2,3-dihydrobenzofuran-5-carboxylate	55601697	C20H15F3N4O4	59.0128:[C2H2O2+H]-;89.0232:[C3H3O3+2H]-;101.0236:[C4H3O3+2H]-;125.0244:[C6H5O3]-;191.0196:[C7H5F3NO2]-H-;205.073:[C11H9NO3+2H]-	2.35894888440004	59.0128_188.8;89.0232_90.6;101.0236_177.5;125.0244_187.2;191.0196_169.7;205.073_113.5	11	6
46.9898065144271	0.29	InChI=1S/C18H20N6O3S2/c1-11-9-12(2)22-17(21-11)24-18-23-15(10-28-18)16(25)20-8-7-13-3-5-14(6-4-13)29(19,26)27/h3-6,9-10H,7-8H2,1-2H3,(H,20,25)(H2,19,26,27)(H,21,22,23,24)	432.104	2-[(4,6-dimethylpyrimidin-2-yl)amino]-N-[2-(4-sulfamoylphenyl)ethyl]thiazole-4-carboxamide	90506161	C18H20N6O3S2	284.0316:[C11H12N2O3S2]-	1.3314913477455086	284.0316_540.0	11	1
46.262909214092765	0.2895	InChI=1S/C18H20N6O3S2/c1-24-17(14-7-9-20-10-8-14)22-23-18(24)28-12-16(25)21-11-6-13-2-4-15(5-3-13)29(19,26)27/h2-5,7-10H,6,11-12H2,1H3,(H,21,25)(H2,19,26,27)	432.104	2-[[4-methyl-5-(4-pyridyl)-1,2,4-triazol-3-yl]sulfanyl]-N-[2-(4-sulfamoylphenyl)ethyl]acetamide	17551393	C18H20N6O3S2	284.0316:[C11H13N2O3S2]-H-	1.3748327352659526	284.0316_540.0	11	1
46.9898065144271	0.2891	InChI=1S/C18H20N6O3S2/c1-11-7-12(2)20-17(19-11)23-18-22-15(10-28-18)9-16(25)21-13-5-4-6-14(8-13)24-29(3,26)27/h4-8,10,24H,9H2,1-3H3,(H,21,25)(H,19,20,22,23)	432.104	2-[2-[(4,6-dimethylpyrimidin-2-yl)amino]thiazol-4-yl]-N-[3-(methanesulfonamido)phenyl]acetamide	49677943	C18H20N6O3S2	284.0316:[C11H12N2O3S2]-	1.316952255712395	284.0316_540.0	11	1
42.56164535618525	0.2883	InChI=1S/C18H20N6O3S2/c1-4-27-17(26)15-14(13-9(2)7-10(3)19-16(13)29-15)20-12(25)8-28-18-21-22-23-24(18)11-5-6-11/h7,11H,4-6,8H2,1-3H3,(H,20,25)	432.104	ethyl 3-[[2-(1-cyclopropyltetrazol-5-yl)sulfanylacetyl]amino]-4,6-dimethyl-thieno[2,3-b]pyridine-2-carboxylate	52568313	C18H20N6O3S2	59.0128:[C2H2O2+H]-;284.0316:[C11H11N2O3S2+H]-	1.6208046933096576	59.0128_188.8;284.0316_540.0	11	2
38.26070002836257	0.288	InChI=1S/C18H20N6O3S2/c1-2-27-17(26)12-9-5-3-4-6-10(9)29-16(12)22-11(25)7-28-18-23-14(19)13-15(24-18)21-8-20-13/h8H,2-7H2,1H3,(H,22,25)(H3,19,20,21,23,24)	432.104	ethyl 2-[[2-[(6-amino-7H-purin-2-yl)sulfanyl]acetyl]amino]-4,5,6,7-tetrahydrobenzothiophene-3-carboxylate	4913341	C18H20N6O3S2	59.0128:[C2H2O2+H]-;284.0316:[C11H11N2O3S2+H]-	1.9251789478960106	59.0128_188.8;284.0316_540.0	11	2
38.26070002836257	0.288	InChI=1S/C18H20N6O3S2/c1-2-27-17(26)12-9-5-3-4-6-10(9)29-16(12)22-11(25)7-28-18-23-13-14(19)20-8-21-15(13)24-18/h8H,2-7H2,1H3,(H,22,25)(H3,19,20,21,23,24)	432.104	ethyl 2-[[2-[(6-amino-7H-purin-8-yl)sulfanyl]acetyl]amino]-4,5,6,7-tetrahydrobenzothiophene-3-carboxylate	3193198	C18H20N6O3S2	59.0128:[C2H2O2+H]-;284.0316:[C11H11N2O3S2+H]-	1.9251789478960106	59.0128_188.8;284.0316_540.0	11	2
42.30162349840488	0.2874	InChI=1S/C23H17FN4O2S/c24-18-9-3-1-6-15(18)14-31-23-26-22(29)21-17-8-2-4-10-19(17)25-20(28(21)27-23)12-11-16-7-5-13-30-16/h1-13,20H,14H2,(H,26,27,29)/b12-11+	432.106	3-[(2-fluorophenyl)methylsulfanyl]-6-[(E)-2-(2-furyl)vinyl]-4,6-dihydro-[1,2,4]triazino[1,6-c]quinazolin-1-one	117057774	C23H17FN4O2S	205.073:[C9H7N4O2+2H]-;284.0316:[C14H9FN3OS-H]-H-	1.6253430714687065	205.073_113.5;284.0316_540.0	11	2
46.262909214092765	0.2872	InChI=1S/C18H20N6O3S2/c1-13-4-2-3-5-16(13)24-18(21-22-23-24)28-12-17(25)20-11-10-14-6-8-15(9-7-14)29(19,26)27/h2-9H,10-12H2,1H3,(H,20,25)(H2,19,26,27)	432.104	2-[1-(o-tolyl)tetrazol-5-yl]sulfanyl-N-[2-(4-sulfamoylphenyl)ethyl]acetamide	4844205	C18H20N6O3S2	284.0316:[C11H13N2O3S2]-H-	1.3374510398660682	284.0316_540.0	11	1
46.262909214092765	0.2869	InChI=1S/C18H20N6O3S2/c1-12-6-4-7-13(19-12)16-20-18(23-22-16)21-17(25)14-8-2-3-10-24(14)29(26,27)15-9-5-11-28-15/h4-7,9,11,14H,2-3,8,10H2,1H3,(H2,20,21,22,23,25)/t14-/m1/s1	432.104	(2R)-N-[5-(6-methyl-2-pyridyl)-1H-1,2,4-triazol-3-yl]-1-(2-thienylsulfonyl)piperidine-2-carboxamide	99515053	C18H20N6O3S2	284.0316:[C11H13N2O3S2]-H-	1.3336850436058774	284.0316_540.0	11	1
39.71854329752411	0.2869	InChI=1S/C23H17FN4O2S/c24-17-10-4-6-12-19(17)29-14-21-26-27-23(28(21)16-8-2-1-3-9-16)31-15-22-25-18-11-5-7-13-20(18)30-22/h1-13H,14-15H2	432.106	2-[[5-[(2-fluorophenoxy)methyl]-4-phenyl-1,2,4-triazol-3-yl]sulfanylmethyl]-1,3-benzoxazole	29403620	C23H17FN4O2S	284.0316:[C14H10FN3OS-2H]-H-	1.8026128021527106	284.0316_540.0	11	1
46.262909214092765	0.2861	InChI=1S/C18H20N6O3S2/c19-24-17(14-4-2-1-3-5-14)22-23-18(24)28-12-16(25)21-11-10-13-6-8-15(9-7-13)29(20,26)27/h1-9H,10-12,19H2,(H,21,25)(H2,20,26,27)	432.104	2-[(4-amino-5-phenyl-1,2,4-triazol-3-yl)sulfanyl]-N-[2-(4-sulfamoylphenyl)ethyl]acetamide	4849916	C18H20N6O3S2	284.0316:[C11H13N2O3S2]-H-	1.320685742841928	284.0316_540.0	11	1
46.262909214092765	0.2857	InChI=1S/C18H20N6O3S2/c1-12-6-4-5-7-15(12)24-18(21-22-23-24)28-11-17(25)20-14-9-8-13(2)16(10-14)29(26,27)19-3/h4-10,19H,11H2,1-3H3,(H,20,25)	432.104	N-[4-methyl-3-(methylsulfamoyl)phenyl]-2-[1-(o-tolyl)tetrazol-5-yl]sulfanyl-acetamide	24475439	C18H20N6O3S2	284.0316:[C11H13N2O3S2]-H-	1.3135945754660676	284.0316_540.0	11	1
46.262909214092765	0.2857	InChI=1S/C18H20N6O3S2/c1-12-5-4-6-15(9-12)24-18(21-22-23-24)28-11-17(25)20-14-8-7-13(2)16(10-14)29(26,27)19-3/h4-10,19H,11H2,1-3H3,(H,20,25)	432.104	N-[4-methyl-3-(methylsulfamoyl)phenyl]-2-[1-(m-tolyl)tetrazol-5-yl]sulfanyl-acetamide	24476169	C18H20N6O3S2	284.0316:[C11H13N2O3S2]-H-	1.3135945754660676	284.0316_540.0	11	1
46.262909214092765	0.2857	InChI=1S/C18H20N6O3S2/c1-12-4-8-15(9-5-12)24-18(21-22-23-24)28-11-17(25)20-14-7-6-13(2)16(10-14)29(26,27)19-3/h4-10,19H,11H2,1-3H3,(H,20,25)	432.104	N-[4-methyl-3-(methylsulfamoyl)phenyl]-2-[1-(p-tolyl)tetrazol-5-yl]sulfanyl-acetamide	24474824	C18H20N6O3S2	284.0316:[C11H13N2O3S2]-H-	1.3135945754660676	284.0316_540.0	11	1
46.262909214092765	0.2855	InChI=1S/C18H20N6O3S2/c1-12-4-3-5-15(10-12)24-18(21-22-23-24)28-11-17(25)20-13(2)14-6-8-16(9-7-14)29(19,26)27/h3-10,13H,11H2,1-2H3,(H,20,25)(H2,19,26,27)	432.104	2-[1-(m-tolyl)tetrazol-5-yl]sulfanyl-N-[1-(4-sulfamoylphenyl)ethyl]acetamide	16564971	C18H20N6O3S2	284.0316:[C11H13N2O3S2]-H-	1.309876619103242	284.0316_540.0	11	1
41.32935217495919	0.2852	InChI=1S/C23H17FN4O2S/c1-13-9-21(28(27-13)23-25-18-8-7-16(24)12-20(18)31-23)26-22(29)17-10-14-5-3-4-6-15(14)11-19(17)30-2/h3-12H,1-2H3,(H,26,29)	432.106	N-[2-(6-fluoro-1,3-benzothiazol-2-yl)-5-methyl-pyrazol-3-yl]-3-methoxy-naphthalene-2-carboxamide	29696065	C23H17FN4O2S	205.073:[C9H8N4O2+H]-;284.0316:[C14H9FN3OS-H]-H-	1.6596378866111414	205.073_113.5;284.0316_540.0	11	2
41.32935217495919	0.2852	InChI=1S/C23H17FN4O2S/c1-13-10-20(28(27-13)23-26-21-17(24)8-5-9-19(21)31-23)25-22(29)16-11-14-6-3-4-7-15(14)12-18(16)30-2/h3-12H,1-2H3,(H,25,29)	432.106	N-[2-(4-fluoro-1,3-benzothiazol-2-yl)-5-methyl-pyrazol-3-yl]-3-methoxy-naphthalene-2-carboxamide	29696436	C23H17FN4O2S	205.073:[C9H8N4O2+H]-;284.0316:[C14H9FN3OS-H]-H-	1.6596378866111414	205.073_113.5;284.0316_540.0	11	2
46.298422547526876	0.2845	InChI=1S/C18H20N6O3S2/c1-23-17(20-21-22-23)13-5-2-7-15(11-13)19-18(25)14-6-3-9-24(12-14)29(26,27)16-8-4-10-28-16/h2,4-5,7-8,10-11,14H,3,6,9,12H2,1H3,(H,19,25)	432.104	N-[3-(1-methyltetrazol-5-yl)phenyl]-1-(2-thienylsulfonyl)piperidine-3-carboxamide	42930299	C18H20N6O3S2	284.0316:[C11H13N2O3S2]-H-	1.2908660221709876	284.0316_540.0	11	1
45.235584402673844	0.2832	InChI=1S/C23H17FN4O2S/c1-14-6-10-16(11-7-14)26-21(30)23-28-27-22(31-23)15-8-12-17(13-9-15)25-20(29)18-4-2-3-5-19(18)24/h2-13H,1H3,(H,25,29)(H,26,30)	432.106	5-[4-[(2-fluorobenzoyl)amino]phenyl]-N-(p-tolyl)-1,3,4-thiadiazole-2-carboxamide	46319369	C23H17FN4O2S	284.0316:[C14H9FN3OS-H]-H-	1.346656384368675	284.0316_540.0	11	1
46.262909214092765	0.2829	InChI=1S/C18H20N6O3S2/c1-13-7-4-5-10-16(13)24-18(20-21-22-24)28-12-17(25)19-14-8-6-9-15(11-14)29(26,27)23(2)3/h4-11H,12H2,1-3H3,(H,19,25)	432.104	N-[3-(dimethylsulfamoyl)phenyl]-2-[1-(o-tolyl)tetrazol-5-yl]sulfanyl-acetamide	16508745	C18H20N6O3S2	284.0316:[C11H13N2O3S2]-H-	1.2677716662440939	284.0316_540.0	11	1
42.829139104289254	0.2825	InChI=1S/C18H20N6O3S2/c1-4-13(28-18-21-22-23-24(18)12-9-7-6-8-10-12)15(25)20-17-19-11(3)14(29-17)16(26)27-5-2/h6-10,13H,4-5H2,1-3H3,(H,19,20,25)	432.104	ethyl 4-methyl-2-[2-(1-phenyltetrazol-5-yl)sulfanylbutanoylamino]thiazole-5-carboxylate	2925850	C18H20N6O3S2	59.0128:[C2H2O2+H]-;284.0316:[C11H12N2O3S2]-	1.5071359320517013	59.0128_188.8;284.0316_540.0	11	2
0.0	0.2821	InChI=1S/C25H20O5S/c1-27-17-9-16(10-18(12-17)28-2)6-5-15-7-8-19-23(11-15)31-24-14-22(30-4)21(29-3)13-20(24)25(19)26/h7-14H,1-4H3	432.103	6-[2-(3,5-dimethoxyphenyl)ethynyl]-2,3-dimethoxy-thioxanthen-9-one	25058277	C25H20O5S	NA	4.573746690547743	NA	11	0
26.12792646958816	0.2803	InChI=1S/C20H15F3N4O4/c1-12-16(17(28)24-11-13-6-5-9-15(10-13)31-20(21,22)23)30-19-25-18(26-27(12)19)29-14-7-3-2-4-8-14/h2-10H,11H2,1H3,(H,24,28)	432.105	6-methyl-2-phenoxy-N-[[3-(trifluoromethoxy)phenyl]methyl]oxazolo[3,2-b][1,2,4]triazole-5-carboxamide	72193323	C20H15F3N4O4	125.0244:[C4H3N3O2]-;191.0196:[C7H6N4O3-2H]-H-;205.073:[C9H7N4O2+2H]-	2.6707878383077763	125.0244_187.2;191.0196_169.7;205.073_113.5	11	3
39.71854329752411	0.2803	InChI=1S/C18H20N6O3S2/c1-3-14-21-22-17(23(14)2)28-11-15(25)20-7-8-24-16(26)13(29-18(24)27)9-12-5-4-6-19-10-12/h4-6,9-10H,3,7-8,11H2,1-2H3,(H,20,25)/b13-9+	432.104	N-[2-[(5E)-2,4-dioxo-5-(3-pyridylmethylene)thiazolidin-3-yl]ethyl]-2-[(5-ethyl-4-methyl-1,2,4-triazol-3-yl)sulfanyl]acetamide	99407486	C18H20N6O3S2	284.0316:[C11H10N2O3S2+2H]-	1.6960903500211002	284.0316_540.0	11	1
26.324066977840403	0.2796	InChI=1S/C20H15F3N4O4/c1-11-9-16(29)17(19(31)25-24-18(30)14-7-2-3-8-15(14)28)26-27(11)13-6-4-5-12(10-13)20(21,22)23/h2-10,28H,1H3,(H,24,30)(H,25,31)	432.105	N''-(2-hydroxybenzoyl)-6-methyl-4-oxo-1-[3-(trifluoromethyl)phenyl]pyridazine-3-carbohydrazide	27698349	C20H15F3N4O4	125.0244:[C4H2N3O2+H]-;191.0196:[C7H6N4O3-2H]-H-;205.073:[C9H7N4O2+2H]-	2.6455071633588276	125.0244_187.2;191.0196_169.7;205.073_113.5	11	3
26.324066977840403	0.2796	InChI=1S/C20H15F3N4O4/c1-11-10-16(29)17(19(31)25-24-18(30)12-6-2-5-9-15(12)28)26-27(11)14-8-4-3-7-13(14)20(21,22)23/h2-10,28H,1H3,(H,24,30)(H,25,31)	432.105	N''-(2-hydroxybenzoyl)-6-methyl-4-oxo-1-[2-(trifluoromethyl)phenyl]pyridazine-3-carbohydrazide	30156626	C20H15F3N4O4	125.0244:[C4H2N3O2+H]-;191.0196:[C7H6N4O3-2H]-H-;205.073:[C9H7N4O2+2H]-	2.6455071633588276	125.0244_187.2;191.0196_169.7;205.073_113.5	11	3
46.262909214092765	0.2791	InChI=1S/C18H20N6O3S2/c1-23(2)29(26,27)15-6-4-14(5-7-15)20-16(25)12-28-18-22-21-17(24(18)3)13-8-10-19-11-9-13/h4-11H,12H2,1-3H3,(H,20,25)	432.104	N-[4-(dimethylsulfamoyl)phenyl]-2-[[4-methyl-5-(4-pyridyl)-1,2,4-triazol-3-yl]sulfanyl]acetamide	16384394	C18H20N6O3S2	284.0316:[C11H13N2O3S2]-H-	1.2062227501550868	284.0316_540.0	11	1
42.15291538514201	0.2782	InChI=1S/C18H20N6O3S2/c25-15(26)10-28-16-8-19-17(29-16)20-18(27)24(9-11-3-1-2-4-11)12-5-6-13-14(7-12)22-23-21-13/h5-8,11H,1-4,9-10H2,(H,25,26)(H,19,20,27)(H,21,22,23)	432.104	2-[2-[[2H-benzotriazol-5-yl(cyclopentylmethyl)carbamoyl]amino]thiazol-5-yl]sulfanylacetic acid	25013052	C18H20N6O3S2	59.0128:[C2H3O2]-;284.0316:[C11H15N2O3S2-2H]-H-	1.4869485518622134	59.0128_188.8;284.0316_540.0	11	2
6.278878977437243	0.278	InChI=1S/C21H20O10/c1-4-16(22)28-11-21(31-18(24)6-3,12-29-17(23)5-2)13-30-20(27)15-10-8-7-9-14(15)19(25)26/h4-10H,1-3,11-13H2,(H,25,26)	432.106	2-[2,3-di(prop-2-enoyloxy)-2-(prop-2-enoyloxymethyl)propoxy]carbonylbenzoic acid	59775521	C21H20O10	59.0128:[C2H2O2+H]-;125.0244:[C6H3O3+2H]-	4.0575555571055615	59.0128_188.8;125.0244_187.2	11	2
46.262909214092765	0.2777	InChI=1S/C18H20N6O3S2/c1-13-4-8-15(9-5-13)24-18(20-21-22-24)28-12-17(25)19-14-6-10-16(11-7-14)29(26,27)23(2)3/h4-11H,12H2,1-3H3,(H,19,25)	432.104	N-[4-(dimethylsulfamoyl)phenyl]-2-[1-(p-tolyl)tetrazol-5-yl]sulfanyl-acetamide	3651428	C18H20N6O3S2	284.0316:[C11H13N2O3S2]-H-	1.1838877820686609	284.0316_540.0	11	1
46.262909214092765	0.2777	InChI=1S/C18H20N6O3S2/c1-13-6-4-5-7-16(13)24-18(20-21-22-24)28-12-17(25)19-14-8-10-15(11-9-14)29(26,27)23(2)3/h4-11H,12H2,1-3H3,(H,19,25)	432.104	N-[4-(dimethylsulfamoyl)phenyl]-2-[1-(o-tolyl)tetrazol-5-yl]sulfanyl-acetamide	4240839	C18H20N6O3S2	284.0316:[C11H13N2O3S2]-H-	1.1838877820686609	284.0316_540.0	11	1
46.298422547526876	0.2776	InChI=1S/C18H20N6O3S2/c1-12-5-6-14(11-15(12)24-13(2)20-21-22-24)19-18(25)17-16(7-10-28-17)29(26,27)23-8-3-4-9-23/h5-7,10-11H,3-4,8-9H2,1-2H3,(H,19,25)	432.104	N-[4-methyl-3-(5-methyltetrazol-1-yl)phenyl]-3-pyrrolidin-1-ylsulfonyl-thiophene-2-carboxamide	56398736	C18H20N6O3S2	284.0316:[C11H12N2O3S2]-	1.1793185248547229	284.0316_540.0	11	1
42.158736410604504	0.2764	InChI=1S/C18H20N6O3S2/c1-4-27-18(26)12-14(20)24(22-16(12)29-3)17(25)11-13(19)23(21-15(11)28-2)10-8-6-5-7-9-10/h5-9H,4,19-20H2,1-3H3	432.104	ethyl 5-amino-1-(5-amino-3-methylsulfanyl-1-phenyl-pyrazole-4-carbonyl)-3-methylsulfanyl-pyrazole-4-carboxylate	16750657	C18H20N6O3S2	59.0128:[C2H2O2+H]-;284.0316:[C11H11N2O3S2+H]-	1.4567436888919107	59.0128_188.8;284.0316_540.0	11	2
41.96039017774033	0.2764	InChI=1S/C18H20N6O3S2/c25-17(19-11-16-21-20-15-4-2-1-3-7-24(15)16)12-5-6-13-14(10-12)28-18-22-29(26,27)9-8-23(13)18/h5-6,10H,1-4,7-9,11H2,(H,19,25)	432.104	2,2-dioxo-N-(6,7,8,9-tetrahydro-5H-[1,2,4]triazolo[4,3-a]azepin-3-ylmethyl)-3,4-dihydro-[1,2,4]thiadiazino[3,4-b][1,3]benzothiazole-8-carboxamide	55368382	C18H20N6O3S2	284.0316:[C11H10N2O3S2+2H]-	1.4712750795823903	284.0316_540.0	11	1
43.823642584047725	0.276	InChI=1S/C18H20N6O3S2/c1-4-27-16(26)15-12(2)19-17(29-15)24(10-13-8-6-5-7-9-13)14(25)11-28-18-20-21-22-23(18)3/h5-9H,4,10-11H2,1-3H3	432.104	ethyl 2-[benzyl-[2-(1-methyltetrazol-5-yl)sulfanylacetyl]amino]-4-methyl-thiazole-5-carboxylate	16525275	C18H20N6O3S2	59.0128:[C2H2O2+H]-;284.0316:[C11H12N2O3S2]-	1.3315244962578017	59.0128_188.8;284.0316_540.0	11	2
40.47814026545773	0.2757	InChI=1S/C23H17FN4O2S/c24-16-9-5-14(6-10-16)21-18-3-1-2-4-19(18)23(28-27-21)31-13-20(29)26-17-11-7-15(8-12-17)22(25)30/h1-12H,13H2,(H2,25,30)(H,26,29)	432.106	4-[[2-[4-(4-fluorophenyl)phthalazin-1-yl]sulfanylacetyl]amino]benzamide	5194089	C23H17FN4O2S	284.0316:[C14H9FN3OS-H]-H-	1.56669897381915	284.0316_540.0	11	1
44.62067210496676	0.2754	InChI=1S/C20H22N3O4S2/c1-14(24)23-12-6-7-15-13-16(10-11-18(15)23)29(26,27)21-17-8-4-5-9-19(17)28-20(25)22(2)3/h4-5,8-11,13H,6-7,12H2,1-3H3/q-1	432.105	(1-acetyl-3,4-dihydro-2H-quinolin-6-yl)sulfonyl-[2-(dimethylcarbamoylsulfanyl)phenyl]azanide	52886309	C20H22N3O4S2	284.0316:[C11H11N2O3S2+H]-	1.2638421441776821	284.0316_540.0	11	1
36.1100680817431	0.2753	InChI=1S/C23H17FN4O2S/c24-16-10-12-18(13-11-16)30-14-15-31-23-26-25-22-27(17-6-2-1-3-7-17)21(29)19-8-4-5-9-20(19)28(22)23/h1-13H,14-15H2	432.106	1-[2-(4-fluorophenoxy)ethylsulfanyl]-4-phenyl-[1,2,4]triazolo[4,3-a]quinazolin-5-one	2432084	C23H17FN4O2S	284.0316:[C14H10FN3OS-2H]-H-	1.8724512006863856	284.0316_540.0	11	1
37.31406286507032	0.2742	InChI=1S/C23H17FN4O2S/c1-29-19-8-6-18(7-9-19)28-14-25-20-10-5-16(12-21(20)28)22-26-27-23(30-22)31-13-15-3-2-4-17(24)11-15/h2-12,14H,13H2,1H3	432.106	2-[(3-fluorophenyl)methylsulfanyl]-5-[3-(4-methoxyphenyl)benzimidazol-5-yl]-1,3,4-oxadiazole	68663833	C23H17FN4O2S	284.0316:[C14H9FN3OS-H]-H-	1.7686009254287982	284.0316_540.0	11	1
41.49799110356532	0.2742	InChI=1S/C23H17FN4O2S/c1-14-20(31-23(26-14)15-7-3-2-4-8-15)22(30)28-19-13-16(24)10-11-17(19)27-21(29)18-9-5-6-12-25-18/h2-13H,1H3,(H,27,29)(H,28,30)	432.106	N-[5-fluoro-2-(pyridine-2-carbonylamino)phenyl]-4-methyl-2-phenyl-thiazole-5-carboxamide	55833370	C23H17FN4O2S	284.0316:[C14H8FN3OS]-H-	1.4684316007730633	284.0316_540.0	11	1
39.36042813886888	0.2737	InChI=1S/C17H20Cl2F2N6O/c1-2-22-17(24-9-14-26-25-13-4-3-5-27(13)14)23-8-10-6-11(18)7-12(19)15(10)28-16(20)21/h6-7,16H,2-5,8-9H2,1H3,(H2,22,23,24)	432.104	2-[[3,5-dichloro-2-(difluoromethoxy)phenyl]methyl]-1-(6,7-dihydro-5H-pyrrolo[2,1-c][1,2,4]triazol-3-ylmethyl)-3-ethyl-guanidine	109663367	C17H20Cl2F2N6O	284.0316:[C10H10Cl2F2N2O+2H]-	1.6133649171649476	284.0316_540.0	11	1
43.60838598840608	0.2723	InChI=1S/C23H17FN4O2S/c1-15-19(11-12-29-15)22-26-27-23(28(22)18-5-3-2-4-6-18)31-14-21-25-13-20(30-21)16-7-9-17(24)10-8-16/h2-13H,14H2,1H3	432.106	5-(4-fluorophenyl)-2-[[5-(2-methyl-3-furyl)-4-phenyl-1,2,4-triazol-3-yl]sulfanylmethyl]oxazole	30036093	C23H17FN4O2S	191.0196:[C10H7FNS]-H-;284.0316:[C14H9FN3OS-H]-H-	1.2871800967017224	191.0196_169.7;284.0316_540.0	11	2
41.136869450019915	0.2722	InChI=1S/C21H16FN7OS/c1-13-19(14-7-9-15(22)10-8-14)20-23-16(11-18(30)29(20)25-13)12-31-21-24-26-27-28(21)17-5-3-2-4-6-17/h2-11,30H,12H2,1H3/p-1	432.104	3-(4-fluorophenyl)-2-methyl-5-[(1-phenyltetrazol-5-yl)sulfanylmethyl]pyrazolo[1,5-a]pyrimidin-7-olate	51454058	C21H16FN7OS	284.0316:[C14H7FN3OS]-	1.4616567906323163	284.0316_540.0	11	1
38.77515093449746	0.2722	InChI=1S/C23H17FN4O2S/c24-15-7-5-14(6-8-15)20-12-26-22(30-20)10-9-21(29)28-23-27-19(13-31-23)17-11-25-18-4-2-1-3-16(17)18/h1-8,11-13,25H,9-10H2,(H,27,28,29)	432.106	3-[5-(4-fluorophenyl)oxazol-2-yl]-N-[4-(1H-indol-3-yl)thiazol-2-yl]propanamide	42188362	C23H17FN4O2S	284.0316:[C14H10FN3OS-2H]-H-	1.6311204998137732	284.0316_540.0	11	1
38.77515093449746	0.2722	InChI=1S/C23H17FN4O2S/c24-17-7-3-1-6-15(17)20-12-26-22(30-20)10-9-21(29)28-23-27-19(13-31-23)16-11-25-18-8-4-2-5-14(16)18/h1-8,11-13,25H,9-10H2,(H,27,28,29)	432.106	3-[5-(2-fluorophenyl)oxazol-2-yl]-N-[4-(1H-indol-3-yl)thiazol-2-yl]propanamide	24594308	C23H17FN4O2S	284.0316:[C14H10FN3OS-2H]-H-	1.6311204998137732	284.0316_540.0	11	1
36.38291079641785	0.272	InChI=1S/C23H17FN4O2S/c24-14-7-5-13(6-8-14)22-26-16-10-9-15(11-18(16)27-22)25-21(29)12-20-23(30)28-17-3-1-2-4-19(17)31-20/h1-11,20H,12H2,(H,25,29)(H,26,27)(H,28,30)	432.106	N-[2-(4-fluorophenyl)-3H-benzimidazol-5-yl]-2-(3-oxo-4H-1,4-benzothiazin-2-yl)acetamide	55848758	C23H17FN4O2S	284.0316:[C14H10FN3OS-2H]-H-	1.7999909031721528	284.0316_540.0	11	1
42.25103045916	0.2715	InChI=1S/C23H17FN4O2S/c24-18-10-8-17(9-11-18)21(30)27-22-20(16-4-2-1-3-5-16)26-23(31-22)28-25-14-15-6-12-19(29)13-7-15/h1-14,25H,(H,26,28)(H,27,30)	432.106	4-fluoro-N-[2-[2-[(4-oxocyclohexa-2,5-dien-1-ylidene)methyl]hydrazino]-4-phenyl-thiazol-5-yl]benzamide	16438148	C23H17FN4O2S	284.0316:[C14H9FN3OS-H]-H-	1.3709814135320946	284.0316_540.0	11	1
20.984811234712165	0.2713	InChI=1S/C20H15F3N4O4/c21-20(22,23)30-12-7-5-11(6-8-12)17-26-19(31-27-17)16(10-28)25-18(29)14-9-24-15-4-2-1-3-13(14)15/h1-9,16,24,28H,10H2,(H,25,29)	432.105	N-[2-hydroxy-1-[3-[4-(trifluoromethoxy)phenyl]-1,2,4-oxadiazol-5-yl]ethyl]-1H-indole-3-carboxamide	122581831	C20H15F3N4O4	125.0244:[C4H4N3O2]-H-;191.0196:[C7H3F3NO2+H]-;205.073:[C11H9NO3+2H]-	2.8943058665431614	125.0244_187.2;191.0196_169.7;205.073_113.5	11	3
39.26257063516841	0.2713	InChI=1S/C19H20ClF3N2O4/c1-5-28-16(26)11-9-25(15(14(11)24)17(27)29-18(2,3)4)10-6-7-12(13(20)8-10)19(21,22)23/h6-9H,5,24H2,1-4H3	432.106	O2-tert-butyl O4-ethyl 3-amino-1-[3-chloro-4-(trifluoromethyl)phenyl]pyrrole-2,4-dicarboxylate	58271020	C19H20ClF3N2O4	59.0128:[C2H2O2+H]-;284.0316:[C13H12ClF2NO2-2H]-H-	1.5824925636514293	59.0128_188.8;284.0316_540.0	11	2
36.1100680817431	0.2706	InChI=1S/C23H17FN4O2S/c24-17-12-10-16(11-13-17)14-25-27-21(29)15-31-23-26-20-9-5-4-8-19(20)22(30)28(23)18-6-2-1-3-7-18/h1-14H,15H2,(H,27,29)	432.106	N-[(4-fluorophenyl)methyleneamino]-2-(4-oxo-3-phenyl-quinazolin-2-yl)sulfanyl-acetamide	71832375	C23H17FN4O2S	284.0316:[C14H10FN3OS-2H]-H-	1.797493624260778	284.0316_540.0	11	1
36.1100680817431	0.2706	InChI=1S/C23H17FN4O2S/c24-17-8-6-7-16(13-17)14-25-27-21(29)15-31-23-26-20-12-5-4-11-19(20)22(30)28(23)18-9-2-1-3-10-18/h1-14H,15H2,(H,27,29)/b25-14+	432.106	N-[(E)-(3-fluorophenyl)methyleneamino]-2-(4-oxo-3-phenyl-quinazolin-2-yl)sulfanyl-acetamide	24211204	C23H17FN4O2S	284.0316:[C14H10FN3OS-2H]-H-	1.797493624260778	284.0316_540.0	11	1
36.1100680817431	0.2706	InChI=1S/C23H17FN4O2S/c24-19-12-6-4-8-16(19)14-25-27-21(29)15-31-23-26-20-13-7-5-11-18(20)22(30)28(23)17-9-2-1-3-10-17/h1-14H,15H2,(H,27,29)/b25-14+	432.106	N-[(E)-(2-fluorophenyl)methyleneamino]-2-(4-oxo-3-phenyl-quinazolin-2-yl)sulfanyl-acetamide	24211166	C23H17FN4O2S	284.0316:[C14H10FN3OS-2H]-H-	1.797493624260778	284.0316_540.0	11	1
43.60838598840608	0.2701	InChI=1S/C23H17FN4O2S/c1-15-20(10-11-29-15)21-26-27-23(28(21)19-8-3-2-4-9-19)31-14-18-13-30-22(25-18)16-6-5-7-17(24)12-16/h2-13H,14H2,1H3	432.106	2-(3-fluorophenyl)-4-[[5-(2-methyl-3-furyl)-4-phenyl-1,2,4-triazol-3-yl]sulfanylmethyl]oxazole	46593700	C23H17FN4O2S	191.0196:[C10H7FNS]-H-;284.0316:[C14H9FN3OS-H]-H-	1.250910305291007	191.0196_169.7;284.0316_540.0	11	2
21.915978476458108	0.2698	InChI=1S/C19H20ClF3N2O4/c1-11(2)29-18-16(20)6-12(8-25-18)17(27)24-9-14(26)10-28-15-5-3-4-13(7-15)19(21,22)23/h3-8,11,14,26H,9-10H2,1-2H3,(H,24,27)/t14-/m1/s1	432.106	5-chloro-N-[(2R)-2-hydroxy-3-[3-(trifluoromethyl)phenoxy]propyl]-6-isopropoxy-pyridine-3-carboxamide	98956987	C19H20ClF3N2O4	59.0128:[C2H4O2]-H-;100.9666:[C3HClNO]-H-;191.0196:[C7H7F3NO2-2H]-H-;205.073:[C11H11NO3]-	2.8024747608981473	59.0128_188.8;100.9666_99.2;191.0196_169.7;205.073_113.5	11	4
11.046878307479787	0.2696	InChI=1S/C25H20O5S/c26-23-19(15-17-7-3-1-4-8-17)16-22(24(27)25(23)28)18-11-13-21(14-12-18)31(29,30)20-9-5-2-6-10-20/h1-14,16,26-28H,15H2	432.103	4-[4-(benzenesulfonyl)phenyl]-6-benzyl-benzene-1,2,3-triol	58626380	C25H20O5S	59.0128:[C2H2O2+H]-;101.0236:[C4H3O3+2H]-;125.0244:[C6H4O3+H]-	3.578340437613059	59.0128_188.8;101.0236_177.5;125.0244_187.2	11	3
39.630792141576876	0.2693	InChI=1S/C23H17FN4O2S/c1-13-4-3-5-16(10-13)20-26-21(30-27-20)19-14(2)18-22(31-19)25-12-28(23(18)29)11-15-6-8-17(24)9-7-15/h3-10,12H,11H2,1-2H3	432.106	3-[(4-fluorophenyl)methyl]-5-methyl-6-[3-(m-tolyl)-1,2,4-oxadiazol-5-yl]thieno[2,3-d]pyrimidin-4-one	53331939	C23H17FN4O2S	284.0316:[C14H7FN3OS]-	1.5239386529586925	284.0316_540.0	11	1
39.630792141576876	0.2693	InChI=1S/C23H17FN4O2S/c1-13-5-3-7-16(9-13)20-26-21(30-27-20)19-14(2)18-22(31-19)25-12-28(23(18)29)11-15-6-4-8-17(24)10-15/h3-10,12H,11H2,1-2H3	432.106	3-[(3-fluorophenyl)methyl]-5-methyl-6-[3-(m-tolyl)-1,2,4-oxadiazol-5-yl]thieno[2,3-d]pyrimidin-4-one	53331938	C23H17FN4O2S	284.0316:[C14H7FN3OS]-	1.5239386529586925	284.0316_540.0	11	1
39.630792141576876	0.2693	InChI=1S/C23H17FN4O2S/c1-13-6-5-8-15(10-13)20-26-21(30-27-20)19-14(2)18-22(31-19)25-12-28(23(18)29)11-16-7-3-4-9-17(16)24/h3-10,12H,11H2,1-2H3	432.106	3-[(2-fluorophenyl)methyl]-5-methyl-6-[3-(m-tolyl)-1,2,4-oxadiazol-5-yl]thieno[2,3-d]pyrimidin-4-one	53331937	C23H17FN4O2S	284.0316:[C14H7FN3OS]-	1.5239386529586925	284.0316_540.0	11	1
39.71854329752411	0.2691	InChI=1S/C23H17FN4O2S/c24-18-8-6-16(7-9-18)21-20(15-10-12-25-13-11-15)22(28-27-21)26-19(29)14-31-23(30)17-4-2-1-3-5-17/h1-13H,14H2,(H2,26,27,28,29)	432.106	S-[2-[[5-(4-fluorophenyl)-4-(4-pyridyl)-1H-pyrazol-3-yl]amino]-2-oxo-ethyl] benzenecarbothioate	88097194	C23H17FN4O2S	284.0316:[C14H10FN3OS-2H]-H-	1.5140083253020193	284.0316_540.0	11	1
1.4739074696458527	0.2691	InChI=1S/C25H20O5S/c1-25(18-12-6-3-7-13-18)29-16-20(30-25)24-22(17-10-4-2-5-11-17)23(26)19-14-8-9-15-21(19)31(24,27)28/h2-15,20H,16H2,1H3	432.103	2-(2-methyl-2-phenyl-1,3-dioxolan-4-yl)-1,1-dioxo-3-phenyl-thiochromen-4-one	102492286	C25H20O5S	59.0128:[C2H3O2]-	4.256895817448208	59.0128_188.8	11	1
40.47814026545773	0.2684	InChI=1S/C25H21ClN2OS/c26-20-11-5-3-9-18(20)24-19-10-4-6-12-22(19)30-23-14-13-16(15-21(23)28-24)25(29)27-17-7-1-2-8-17/h3-6,9-15,17H,1-2,7-8H2,(H,27,29)	432.106	6-(2-chlorophenyl)-N-cyclopentyl-benzo[b][1,4]benzothiazepine-3-carboxamide	58872061	C25H21ClN2OS	284.0316:[C16H10ClNS+H]-	1.447917952108017	284.0316_540.0	11	1
40.47814026545773	0.2684	InChI=1S/C25H21ClN2OS/c26-18-12-9-16(10-13-18)24-20-7-3-4-8-22(20)30-23-14-11-17(15-21(23)28-24)25(29)27-19-5-1-2-6-19/h3-4,7-15,19H,1-2,5-6H2,(H,27,29)	432.106	6-(4-chlorophenyl)-N-cyclopentyl-benzo[b][1,4]benzothiazepine-3-carboxamide	58871888	C25H21ClN2OS	284.0316:[C16H10ClNS+H]-	1.447917952108017	284.0316_540.0	11	1
40.47814026545773	0.2684	InChI=1S/C25H21ClN2OS/c26-18-7-5-6-16(14-18)24-20-10-3-4-11-22(20)30-23-13-12-17(15-21(23)28-24)25(29)27-19-8-1-2-9-19/h3-7,10-15,19H,1-2,8-9H2,(H,27,29)	432.106	6-(3-chlorophenyl)-N-cyclopentyl-benzo[b][1,4]benzothiazepine-3-carboxamide	58871915	C25H21ClN2OS	284.0316:[C16H10ClNS+H]-	1.447917952108017	284.0316_540.0	11	1
34.2850989653659	0.2676	InChI=1S/C19H20ClF3N2O4/c1-10-7-14(11(2)25(10)9-19(21,22)23)18(27)29-12(3)17(26)24-15-8-13(20)5-6-16(15)28-4/h5-8,12H,9H2,1-4H3,(H,24,26)	432.106	[2-(5-chloro-2-methoxy-anilino)-1-methyl-2-oxo-ethyl] 2,5-dimethyl-1-(2,2,2-trifluoroethyl)pyrrole-3-carboxylate	46640267	C19H20ClF3N2O4	101.0236:[C4H5O3]-;125.0244:[C6H6O3]-H-;191.0196:[C7H6F3NO2-H]-H-;205.073:[C9H9F3NO+H]-	1.8787166518854437	101.0236_177.5;125.0244_187.2;191.0196_169.7;205.073_113.5	11	4
39.840199562323406	0.2674	InChI=1S/C23H17FN4O2S/c24-19-9-5-4-8-18(19)22(30)28-23-26-17(14-31-23)12-21(29)27-20-11-10-16(13-25-20)15-6-2-1-3-7-15/h1-11,13-14H,12H2,(H,25,27,29)(H,26,28,30)	432.106	2-fluoro-N-[4-[2-oxo-2-[(5-phenyl-2-pyridyl)amino]ethyl]thiazol-2-yl]benzamide	55952833	C23H17FN4O2S	284.0316:[C14H9FN3OS-H]-H-	1.476925304735972	284.0316_540.0	11	1
34.52605392790336	0.2663	InChI=1S/C23H17FN4O2S/c1-30-16-10-11-19-20(12-16)27-23(26-19)31-13-21-25-18-5-3-2-4-17(18)22(29)28(21)15-8-6-14(24)7-9-15/h2-12H,13H2,1H3,(H,26,27)	432.106	3-(4-fluorophenyl)-2-[(6-methoxy-1H-benzimidazol-2-yl)sulfanylmethyl]quinazolin-4-one	27349154	C23H17FN4O2S	284.0316:[C14H9FN3OS-H]-H-	1.8402208334025532	284.0316_540.0	11	1
42.945879439847715	0.266	InChI=1S/C23H17FN4O2S/c24-18-10-8-17(9-11-18)22-25-19(14-30-22)15-31-23-27-26-21(20-7-4-12-29-20)28(23)13-16-5-2-1-3-6-16/h1-12,14H,13,15H2	432.106	4-[[4-benzyl-5-(2-furyl)-1,2,4-triazol-3-yl]sulfanylmethyl]-2-(4-fluorophenyl)oxazole	31775628	C23H17FN4O2S	191.0196:[C10H7FNS]-H-;284.0316:[C14H10FN3OS-2H]-H-	1.2316741756702776	191.0196_169.7;284.0316_540.0	11	2
38.36535196175917	0.2656	InChI=1S/C23H17FN4O2S/c1-13-3-4-16(9-14(13)2)18-11-31-22-20(18)23(29)28(12-25-22)10-19-26-21(27-30-19)15-5-7-17(24)8-6-15/h3-9,11-12H,10H2,1-2H3	432.106	5-(3,4-dimethylphenyl)-3-[[3-(4-fluorophenyl)-1,2,4-oxadiazol-5-yl]methyl]thieno[2,3-d]pyrimidin-4-one	18268824	C23H17FN4O2S	125.0244:[C4H2N3O2+H]-;284.0316:[C14H8FN3OS]-H-	1.5534648298216855	125.0244_187.2;284.0316_540.0	11	2
32.79061603544282	0.2649	InChI=1S/C18H12N10O4/c19-13-11-15(23-5-21-13)27(7-25-11)31-17(29)9-3-1-2-4-10(9)18(30)32-28-8-26-12-14(20)22-6-24-16(12)28/h1-8H,(H2,19,21,23)(H2,20,22,24)	432.104	bis(6-aminopurin-9-yl) benzene-1,2-dicarboxylate	90694254	C18H12N10O4	284.0316:[C11H6N6O4-H]-H-	1.9428390325675569	284.0316_540.0	11	1
39.96302892831857	0.2638	InChI=1S/C23H17FN4O2S/c1-12-4-9-18-20(13(12)2)25-23-28(18)22(30)19(31-23)10-16-11-27(14(3)29)26-21(16)15-5-7-17(24)8-6-15/h4-11H,1-3H3/b19-10+	432.106	(2E)-2-[[1-acetyl-3-(4-fluorophenyl)pyrazol-4-yl]methylene]-5,6-dimethyl-thiazolo[3,2-a]benzimidazol-1-one	5436469	C23H17FN4O2S	284.0316:[C14H9FN3OS-H]-H-	1.4105003592733207	284.0316_540.0	11	1
39.96302892831857	0.2638	InChI=1S/C23H17FN4O2S/c1-12-8-18-19(9-13(12)2)28-22(30)20(31-23(28)25-18)10-16-11-27(14(3)29)26-21(16)15-4-6-17(24)7-5-15/h4-11H,1-3H3/b20-10+	432.106	(2E)-2-[[1-acetyl-3-(4-fluorophenyl)pyrazol-4-yl]methylene]-6,7-dimethyl-thiazolo[3,2-a]benzimidazol-1-one	92903826	C23H17FN4O2S	284.0316:[C14H9FN3OS-H]-H-	1.4105003592733207	284.0316_540.0	11	1
40.47814026545773	0.2637	InChI=1S/C23H17FN4O2S/c24-19-9-5-4-8-18(19)21-26-23(28-27-21)31-14-20(29)15-10-12-17(13-11-15)25-22(30)16-6-2-1-3-7-16/h1-13H,14H2,(H,25,30)(H,26,27,28)	432.106	N-[4-[2-[[5-(2-fluorophenyl)-1H-1,2,4-triazol-3-yl]sulfanyl]acetyl]phenyl]benzamide	30782917	C23H17FN4O2S	284.0316:[C14H9FN3OS-H]-H-	1.3721398186642277	284.0316_540.0	11	1
39.33904735465412	0.2636	InChI=1S/C23H17FN4O2S/c1-13-19-14(2)25-21(18-6-5-11-30-18)27-23(19)31-20(13)22(29)26-17-12-15(7-8-16(17)24)28-9-3-4-10-28/h3-12H,1-2H3,(H,26,29)	432.106	N-(2-fluoro-5-pyrrol-1-yl-phenyl)-2-(2-furyl)-4,5-dimethyl-thieno[2,3-d]pyrimidine-6-carboxamide	99418262	C23H17FN4O2S	284.0316:[C14H10FN3OS-2H]-H-	1.452519981633795	284.0316_540.0	11	1
9.572204163275027	0.2635	InChI=1S/C25H20O5S/c26-24-15-21-9-5-4-8-20(21)14-23(24)25(27)30-16-18-10-12-22(13-11-18)31(28,29)17-19-6-2-1-3-7-19/h1-15,26H,16-17H2	432.103	(4-benzylsulfonylphenyl)methyl 3-hydroxynaphthalene-2-carboxylate	1300589	C25H20O5S	59.0128:[C2H2O2+H]-;101.0236:[C4H3O3+2H]-;125.0244:[C6H5O3]-	3.5851293528924133	59.0128_188.8;101.0236_177.5;125.0244_187.2	11	3
41.16145954454454	0.2629	InChI=1S/C18H20N6O3S2/c1-13-4-7-17(28-13)29(26,27)23-8-2-3-14(10-23)18(25)22-15-5-6-16(20-9-15)24-12-19-11-21-24/h4-7,9,11-12,14H,2-3,8,10H2,1H3,(H,22,25)	432.104	1-[(5-methyl-2-thienyl)sulfonyl]-N-[6-(1,2,4-triazol-1-yl)-3-pyridyl]piperidine-3-carboxamide	42949257	C18H20N6O3S2	284.0316:[C11H12N2O3S2]-	1.3093211975924	284.0316_540.0	11	1
41.16145954454454	0.2629	InChI=1S/C18H20N6O3S2/c1-13-7-8-17(28-13)29(26,27)23-9-3-4-14(11-23)18(25)20-15-5-2-6-16(10-15)24-12-19-21-22-24/h2,5-8,10,12,14H,3-4,9,11H2,1H3,(H,20,25)/t14-/m0/s1	432.104	(3S)-1-[(5-methyl-2-thienyl)sulfonyl]-N-[3-(tetrazol-1-yl)phenyl]piperidine-3-carboxamide	30537824	C18H20N6O3S2	284.0316:[C11H12N2O3S2]-	1.3091050252234595	284.0316_540.0	11	1
41.67591283052386	0.2626	InChI=1S/C18H20N6O3S2/c1-13-9-10-14(11-16(13)29(26,27)23(2)3)19-17(25)12-28-18-20-21-22-24(18)15-7-5-4-6-8-15/h4-11H,12H2,1-3H3,(H,19,25)	432.104	N-[3-(dimethylsulfamoyl)-4-methyl-phenyl]-2-(1-phenyltetrazol-5-yl)sulfanyl-acetamide	4694644	C18H20N6O3S2	284.0316:[C11H12N2O3S2]-	1.2677716662440939	284.0316_540.0	11	1
40.47814026545773	0.262	InChI=1S/C23H17FN4O2S/c24-17-9-6-15(7-10-17)21-16(14-28(27-21)18-4-2-1-3-5-18)8-11-20(29)26-23-19(22(25)30)12-13-31-23/h1-14H,(H2,25,30)(H,26,29)	432.106	2-[3-[3-(4-fluorophenyl)-1-phenyl-pyrazol-4-yl]prop-2-enoylamino]thiophene-3-carboxamide	5168799	C23H17FN4O2S	284.0316:[C14H9FN3OS-H]-H-	1.3438827975259506	284.0316_540.0	11	1
22.54013285808234	0.2618	InChI=1S/C19H20ClF3N2O4/c1-11(2)29-17-14(20)7-13(8-15(17)27-3)18(26)25-9-12-4-5-24-16(6-12)28-10-19(21,22)23/h4-8,11H,9-10H2,1-3H3,(H,25,26)	432.106	3-chloro-4-isopropoxy-5-methoxy-N-[[2-(2,2,2-trifluoroethoxy)-4-pyridyl]methyl]benzamide	39501544	C19H20ClF3N2O4	191.0196:[C7H6F3NO2-H]-H-;205.073:[C11H13NO3-H]-H-	2.628697229082301	191.0196_169.7;205.073_113.5	11	2
41.136869450019915	0.2618	InChI=1S/C18H20N6O3S2/c1-14(18-20-21-22-24(18)15-5-3-2-4-6-15)28-17-8-7-16(13-19-17)29(25,26)23-9-11-27-12-10-23/h2-8,13-14H,9-12H2,1H3/t14-/m1/s1	432.104	4-[[6-[(1R)-1-(1-phenyltetrazol-5-yl)ethyl]sulfanyl-3-pyridyl]sulfonyl]morpholine	51942059	C18H20N6O3S2	284.0316:[C11H12N2O3S2]-	1.294215956713143	284.0316_540.0	11	1
40.47814026545773	0.2615	InChI=1S/C25H21ClN2OS/c26-19-8-6-7-17(15-19)24-20-9-2-3-10-22(20)30-23-12-11-18(16-21(23)27-24)25(29)28-13-4-1-5-14-28/h2-3,6-12,15-16H,1,4-5,13-14H2	432.106	[6-(3-chlorophenyl)benzo[b][1,4]benzothiazepin-3-yl]-(1-piperidyl)methanone	58872202	C25H21ClN2OS	284.0316:[C16H10ClNS+H]-	1.3353796993634566	284.0316_540.0	11	1
40.47814026545773	0.2615	InChI=1S/C25H21ClN2OS/c26-19-10-7-17(8-11-19)20-5-4-6-23-21(20)16-27-22-15-18(9-12-24(22)30-23)25(29)28-13-2-1-3-14-28/h4-12,15-16H,1-3,13-14H2	432.106	[7-(4-chlorophenyl)benzo[b][1,4]benzothiazepin-3-yl]-(1-piperidyl)methanone	91452373	C25H21ClN2OS	284.0316:[C16H10ClNS+H]-	1.3353796993634566	284.0316_540.0	11	1
40.47814026545773	0.2615	InChI=1S/C25H21ClN2OS/c26-19-11-8-17(9-12-19)24-20-6-2-3-7-22(20)30-23-13-10-18(16-21(23)27-24)25(29)28-14-4-1-5-15-28/h2-3,6-13,16H,1,4-5,14-15H2	432.106	[6-(4-chlorophenyl)benzo[b][1,4]benzothiazepin-3-yl]-(1-piperidyl)methanone	58871834	C25H21ClN2OS	284.0316:[C16H10ClNS+H]-	1.3353796993634566	284.0316_540.0	11	1
18.99547925460593	0.2614	InChI=1S/C22H19ClF2N2O3/c1-27-19(15-8-13(12-24)9-16(25)10-15)11-17(20(28)22(27)30)21(29)26-7-6-14-4-2-3-5-18(14)23/h2-5,8-11,28H,6-7,12H2,1H3,(H,26,29)	432.105	N-[2-(2-chlorophenyl)ethyl]-6-[3-fluoro-5-(fluoromethyl)phenyl]-3-hydroxy-1-methyl-2-oxo-pyridine-4-carboxamide	90349479	C22H19ClF2N2O3	191.0196:[C10H6F2NO-2H]-H-;205.073:[C11H10NO3+H]-	2.874991595848439	191.0196_169.7;205.073_113.5	11	2
24.915471382731134	0.2613	InChI=1S/C20H15F3N4O4/c1-27-16(18(25)29)15(17(24)28)26-14(19(27)30)11-6-4-5-10(9-11)12-7-2-3-8-13(12)31-20(21,22)23/h2-9H,1H3,(H2,24,28)(H2,25,29)	432.105	1-methyl-6-oxo-5-[3-[2-(trifluoromethoxy)phenyl]phenyl]pyrazine-2,3-dicarboxamide	11524830	C20H15F3N4O4	125.0244:[C4H4N3O2]-H-;191.0196:[C7H4N4O3]-H-;205.073:[C9H7N4O2+2H]-	2.449851318269712	125.0244_187.2;191.0196_169.7;205.073_113.5	11	3
33.41940639833567	0.2609	InChI=1S/C23H17FN4O2S/c1-29-20-12-19-15(11-17(20)24)16(21(26-19)13-6-3-2-4-7-13)10-14-8-5-9-18(25-14)22-27-23(31)30-28-22/h2-9,11-12,26H,10H2,1H3,(H,27,28,31)	432.106	3-[6-[(5-fluoro-6-methoxy-2-phenyl-1H-indol-3-yl)methyl]-2-pyridyl]-2H-1,2,4-oxadiazole-5-thione	88862810	C23H17FN4O2S	284.0316:[C14H8FN3OS]-H-	1.8333561300977201	284.0316_540.0	11	1
32.19740634299929	0.2607	InChI=1S/C26H16N4OS/c1-2-5-18(6-3-1)22-16-32-26-23(22)25(29-24(30-26)19-7-4-11-27-14-19)31-21-9-8-17-10-12-28-15-20(17)13-21/h1-16H	432.104	4-(7-isoquinolyloxy)-5-phenyl-2-(3-pyridyl)thieno[2,3-d]pyrimidine	40225230	C26H16N4OS	284.0316:[C19H11OS-2H]-H-	1.9171097548146288	284.0316_540.0	11	1
33.42582201150554	0.2606	InChI=1S/C23H17FN4O2S/c1-2-28-19-8-6-15(11-20(19)31-22-17(23(28)30)4-3-9-26-22)13-27-21(29)16-7-5-14(12-25)10-18(16)24/h3-11H,2,13H2,1H3,(H,27,29)	432.106	4-cyano-N-[(6-ethyl-5-oxo-pyrido[2,3-b][1,5]benzothiazepin-9-yl)methyl]-2-fluoro-benzamide	53040333	C23H17FN4O2S	284.0316:[C14H8FN3OS]-H-	1.8282710048448485	284.0316_540.0	11	1
40.869375701915914	0.2606	InChI=1S/C18H20N6O3S2/c1-23-17(19)21-22-18(23)28-12-16(25)20-13-7-6-10-15(11-13)29(26,27)24(2)14-8-4-3-5-9-14/h3-11H,12H2,1-2H3,(H2,19,21)(H,20,25)	432.104	2-[(5-amino-4-methyl-1,2,4-triazol-3-yl)sulfanyl]-N-[3-[methyl(phenyl)sulfamoyl]phenyl]acetamide	55602591	C18H20N6O3S2	284.0316:[C11H11N2O3S2+H]-	1.2930947145026466	284.0316_540.0	11	1
18.30844177225649	0.2599	InChI=1S/C21H25BrN2O3/c1-16(25)20-13-17(22)7-8-21(20)27-15-19(26)14-23-9-11-24(12-10-23)18-5-3-2-4-6-18/h2-8,13,19,26H,9-12,14-15H2,1H3	432.105	1-[5-bromo-2-[2-hydroxy-3-(4-phenylpiperazin-1-yl)propoxy]phenyl]ethanone	3061344	C21H25BrN2O3	59.0128:[C2H4O2]-H-;125.0244:[C6H7O3-H]-H-;205.073:[C11H12NO3]-H-	2.9012146558645826	59.0128_188.8;125.0244_187.2;205.073_113.5	11	3
42.13137292977839	0.2594	InChI=1S/C18H20N6O3S2/c1-3-19-29(26,27)15-11-9-14(10-12-15)20-17(25)16(13-7-5-4-6-8-13)28-18-21-22-23-24(18)2/h4-12,16,19H,3H2,1-2H3,(H,20,25)/t16-/m0/s1	432.104	(2S)-N-[4-(ethylsulfamoyl)phenyl]-2-(1-methyltetrazol-5-yl)sulfanyl-2-phenyl-acetamide	98005202	C18H20N6O3S2	284.0316:[C11H12N2O3S2]-	1.1840101917654196	284.0316_540.0	11	1
19.898279267108016	0.2594	InChI=1S/C20H15F3N4O4/c21-20(22,23)31-14-3-1-2-13(8-14)27-9-11(6-17(27)28)18(29)26-12-4-5-16-15(7-12)19(30)25-10-24-16/h1-5,7-8,10-11H,6,9H2,(H,26,29)(H,24,25,30)/t11-/m1/s1	432.105	(3R)-5-oxo-N-(4-oxo-1H-quinazolin-6-yl)-1-[3-(trifluoromethoxy)phenyl]pyrrolidine-3-carboxamide	100014529	C20H15F3N4O4	191.0196:[C7H5F3NO2]-H-;205.073:[C11H10NO3+H]-	2.778582970916404	191.0196_169.7;205.073_113.5	11	2
42.10492599251619	0.2593	InChI=1S/C18H20N6O3S2/c1-3-15(28-18-21-11-12-24(18)2)16(25)22-13-5-7-14(8-6-13)29(26,27)23-17-19-9-4-10-20-17/h4-12,15H,3H2,1-2H3,(H,22,25)(H,19,20,23)	432.104	2-(1-methylimidazol-2-yl)sulfanyl-N-[4-(pyrimidin-2-ylsulfamoyl)phenyl]butanamide	25039753	C18H20N6O3S2	284.0316:[C11H12N2O3S2]-	1.1838261426881593	284.0316_540.0	11	1
18.558460978283048	0.2589	InChI=1S/C20H15F3N4O4/c1-26-16-14(18(28)27(2)19(26)29)17(25-15(24-16)13-7-4-8-30-13)31-10-11-5-3-6-12(9-11)20(21,22)23/h3-9H,10H2,1-2H3	432.105	7-(2-furyl)-1,3-dimethyl-5-[[3-(trifluoromethyl)phenyl]methoxy]pyrimido[4,5-d]pyrimidine-2,4-dione	86261591	C20H15F3N4O4	191.0196:[C7H6N4O3-2H]-H-;205.073:[C9H9N4O2]-	2.866547998698976	191.0196_169.7;205.073_113.5	11	2
40.84532691410109	0.2586	InChI=1S/C18H20N6O3S2/c1-12-9-14(28-18-19-7-4-8-20-18)5-6-15(12)23-16(25)10-21-29(26,27)17-11-24(3)13(2)22-17/h4-9,11,21H,10H2,1-3H3,(H,23,25)	432.104	2-[(1,2-dimethylimidazol-4-yl)sulfonylamino]-N-(2-methyl-4-pyrimidin-2-ylsulfanyl-phenyl)acetamide	99420382	C18H20N6O3S2	284.0316:[C11H11N2O3S2+H]-	1.2627324833103315	284.0316_540.0	11	1
40.9417886636247	0.2586	InChI=1S/C18H20N6O3S2/c19-29(26,27)13-7-5-12(6-8-13)9-10-20-17(25)16-14-3-1-2-4-15(14)28-18(16)24-11-21-22-23-24/h5-8,11H,1-4,9-10H2,(H,20,25)(H2,19,26,27)	432.104	N-[2-(4-sulfamoylphenyl)ethyl]-2-(tetrazol-1-yl)-4,5,6,7-tetrahydrobenzothiophene-3-carboxamide	52901496	C18H20N6O3S2	284.0316:[C11H11N2O3S2+H]-	1.2553729237519013	284.0316_540.0	11	1
26.784044819247242	0.2585	InChI=1S/C20H15F3N4O4/c1-19(13-7-9-14(10-8-13)31-20(21,22)23)17(28)27(18(29)24-19)11-15-25-26-16(30-15)12-5-3-2-4-6-12/h2-10H,11H2,1H3,(H,24,29)	432.105	5-methyl-3-[(5-phenyl-1,3,4-oxadiazol-2-yl)methyl]-5-[4-(trifluoromethoxy)phenyl]imidazolidine-2,4-dione	56384679	C20H15F3N4O4	125.0244:[C4H2N3O2+H]-;191.0196:[C7H6N4O3-2H]-H-;205.073:[C9H7N4O2+2H]-	2.2698214120495224	125.0244_187.2;191.0196_169.7;205.073_113.5	11	3
41.136869450019915	0.2585	InChI=1S/C18H20N6O3S2/c1-13-7-9-19-17(21-13)23-29(26,27)15-5-3-14(4-6-15)22-16(25)8-12-28-18-20-10-11-24(18)2/h3-7,9-11H,8,12H2,1-2H3,(H,22,25)(H,19,21,23)	432.104	3-(1-methylimidazol-2-yl)sulfanyl-N-[4-[(4-methylpyrimidin-2-yl)sulfamoyl]phenyl]propanamide	25049667	C18H20N6O3S2	284.0316:[C11H12N2O3S2]-	1.240070160754761	284.0316_540.0	11	1
37.31406286507032	0.2575	InChI=1S/C23H17FN4O2S/c24-16-9-10-18(28-22(30)19-8-4-5-11-25-19)20(12-16)27-21(29)13-17-14-31-23(26-17)15-6-2-1-3-7-15/h1-12,14H,13H2,(H,27,29)(H,28,30)	432.106	N-[4-fluoro-2-[[2-(2-phenylthiazol-4-yl)acetyl]amino]phenyl]pyridine-2-carboxamide	55984962	C23H17FN4O2S	284.0316:[C14H9FN3OS-H]-H-	1.4974509131091271	284.0316_540.0	11	1
41.16145954454454	0.2575	InChI=1S/C18H20N6O3S2/c1-13-4-9-17(28-13)29(26,27)23-10-2-3-14(11-23)18(25)20-15-5-7-16(8-6-15)24-12-19-21-22-24/h4-9,12,14H,2-3,10-11H2,1H3,(H,20,25)/t14-/m0/s1	432.104	(3S)-1-[(5-methyl-2-thienyl)sulfonyl]-N-[4-(tetrazol-1-yl)phenyl]piperidine-3-carboxamide	30536755	C18H20N6O3S2	284.0316:[C11H12N2O3S2]-	1.2220505887203368	284.0316_540.0	11	1
41.67591283052386	0.2567	InChI=1S/C18H20N6O3S2/c1-13(28-18-20-21-22-24(18)15-9-5-4-6-10-15)17(25)19-14-8-7-11-16(12-14)29(26,27)23(2)3/h4-13H,1-3H3,(H,19,25)/t13-/m1/s1	432.104	(2R)-N-[3-(dimethylsulfamoyl)phenyl]-2-(1-phenyltetrazol-5-yl)sulfanyl-propanamide	41750168	C18H20N6O3S2	284.0316:[C11H12N2O3S2]-	1.1723676111438632	284.0316_540.0	11	1
2.4571775188831024	0.2564	InChI=1S/C25H20O5S/c1-15(26)30-19-10-6-17(7-11-19)25-23(21-13-12-20(29-3)14-22(21)31-25)24(27)16-4-8-18(28-2)9-5-16/h4-14H,1-3H3	432.103	[4-[6-methoxy-3-(4-methoxybenzoyl)benzothiophen-2-yl]phenyl] acetate	9802854	C25H20O5S	59.0128:[C2H3O2]-	3.981407147492971	59.0128_188.8	11	1
40.869375701915914	0.2563	InChI=1S/C18H20N6O3S2/c1-2-7-23-14-20-21-18(23)28-13-17(25)22-8-10-24(11-9-22)29(26,27)16-6-4-3-5-15(16)12-19/h2-6,14H,1,7-11,13H2	432.104	2-[4-[2-[(4-allyl-1,2,4-triazol-3-yl)sulfanyl]acetyl]piperazin-1-yl]sulfonylbenzonitrile	24477290	C18H20N6O3S2	284.0316:[C11H14N2O3S2-H]-H-	1.2244118852067174	284.0316_540.0	11	1
19.956120409118828	0.2558	InChI=1S/C20H15F3N4O4/c21-20(22,23)13-2-1-5-24-18(13)31-12-8-27(9-12)19(28)15-7-14(25-26-15)11-3-4-16-17(6-11)30-10-29-16/h1-7,12H,8-10H2,(H,25,26)	432.105	[3-(1,3-benzodioxol-5-yl)-1H-pyrazol-5-yl]-[3-[[3-(trifluoromethyl)-2-pyridyl]oxy]azetidin-1-yl]methanone	122250958	C20H15F3N4O4	59.0128:[C2H2O2+H]-;191.0196:[C7H5F3NO2]-H-;205.073:[C9H8N4O2+H]-	2.7165620484610686	59.0128_188.8;191.0196_169.7;205.073_113.5	11	3
30.330385423751473	0.2557	InChI=1S/C19H20ClF3N2O4/c20-15-3-1-13(2-4-15)11-24-17(27)12-29-18(28)14-5-8-25(9-6-14)10-7-16(26)19(21,22)23/h1-4,7,10,14H,5-6,8-9,11-12H2,(H,24,27)	432.106	[2-[(4-chlorophenyl)methylamino]-2-oxo-ethyl] 1-(4,4,4-trifluoro-3-oxo-but-1-enyl)piperidine-4-carboxylate	3652427	C19H20ClF3N2O4	59.0128:[C2H2O2+H]-;89.0232:[C3H3O3+2H]-;101.0236:[C4H4O3+H]-;125.0244:[C6H8O3-2H]-H-;205.073:[C9H11F3NO]-H-	1.9705923785577564	59.0128_188.8;89.0232_90.6;101.0236_177.5;125.0244_187.2;205.073_113.5	11	5
40.869375701915914	0.2554	InChI=1S/C18H20N6O3S2/c1-13-3-9-16(10-4-13)29(26,27)21-15-7-5-14(6-8-15)19-17(25)11-12-28-18-20-22-23-24(18)2/h3-10,21H,11-12H2,1-2H3,(H,19,25)	432.104	3-(1-methyltetrazol-5-yl)sulfanyl-N-[4-(p-tolylsulfonylamino)phenyl]propanamide	52708128	C18H20N6O3S2	284.0316:[C11H11N2O3S2+H]-	1.2089932587202947	284.0316_540.0	11	1
16.509368066456105	0.2539	InChI=1S/C20H15F3N4O4/c1-10(31-20(30)15-8-24-12-4-2-3-5-13(12)26-15)19(29)25-9-16(28)27-14-7-6-11(21)17(22)18(14)23/h2-8,10H,9H2,1H3,(H,25,29)(H,27,28)	432.105	[1-methyl-2-oxo-2-[[2-oxo-2-(2,3,4-trifluoroanilino)ethyl]amino]ethyl] quinoxaline-2-carboxylate	43028938	C20H15F3N4O4	101.0236:[C4H5O3]-;125.0244:[C6H6O3]-H-;205.073:[C11H9NO3+2H]-	2.9331422158496947	101.0236_177.5;125.0244_187.2;205.073_113.5	11	3
40.857345773925914	0.2531	InChI=1S/C18H20N6O3S2/c1-11-9-16(17(25)10-28-18-20-21-22-24(18)14-3-4-14)12(2)23(11)13-5-7-15(8-6-13)29(19,26)27/h5-9,14H,3-4,10H2,1-2H3,(H2,19,26,27)	432.104	4-[3-[2-(1-cyclopropyltetrazol-5-yl)sulfanylacetyl]-2,5-dimethyl-pyrrol-1-yl]benzenesulfonamide	16301296	C18H20N6O3S2	284.0316:[C11H11N2O3S2+H]-	1.1727887389002987	284.0316_540.0	11	1
32.19169959586168	0.2527	InChI=1S/C26H16N4OS/c31-25-23-22(27-24(28-25)18-14-8-3-9-15-18)20-19(16-10-4-1-5-11-16)21(29-30-26(20)32-23)17-12-6-2-7-13-17/h1-15H,(H,27,28,31)	432.104	3,4,6-triphenyl-5H-pyrimido[4,5]thieno[1,2-d]pyridazin-8-one	10741389	C26H16N4OS	284.0316:[C19H11OS-2H]-H-	1.7882660531291947	284.0316_540.0	11	1
39.9742540624317	0.2521	InChI=1S/C18H20N6O3S2/c1-12-10-13(2)21-17(20-12)23-29(26,27)15-6-4-14(5-7-15)22-16(25)11-28-18-19-8-9-24(18)3/h4-10H,11H2,1-3H3,(H,22,25)(H,20,21,23)	432.104	N-[4-[(4,6-dimethylpyrimidin-2-yl)sulfamoyl]phenyl]-2-(1-methylimidazol-2-yl)sulfanyl-acetamide	2892830	C18H20N6O3S2	284.0316:[C11H11N2O3S2+H]-	1.2197003531688622	284.0316_540.0	11	1
41.136869450019915	0.2521	InChI=1S/C18H20N6O3S2/c1-12-8-9-19-17(21-12)23-29(26,27)15-6-4-14(5-7-15)22-16(25)13(2)28-18-20-10-11-24(18)3/h4-11,13H,1-3H3,(H,22,25)(H,19,21,23)	432.104	2-(1-methylimidazol-2-yl)sulfanyl-N-[4-[(4-methylpyrimidin-2-yl)sulfamoyl]phenyl]propanamide	25035602	C18H20N6O3S2	284.0316:[C11H12N2O3S2]-	1.1361399924406859	284.0316_540.0	11	1
18.105411479077254	0.2509	InChI=1S/C20H15F3N4O4/c21-20(22,23)31-14-8-4-5-12(9-14)15-10-17(25-18(28)16-11-24-19(29)30-16)26-27(15)13-6-2-1-3-7-13/h1-10,16H,11H2,(H,24,29)(H,25,26,28)/t16-/m1/s1	432.105	(5R)-2-oxo-N-[1-phenyl-5-[3-(trifluoromethoxy)phenyl]pyrazol-3-yl]oxazolidine-5-carboxamide	90657021	C20H15F3N4O4	59.0128:[C2H2O2+H]-;101.0236:[C4H4O3+H]-;191.0196:[C7H6N4O3-2H]-H-	2.7691382224582495	59.0128_188.8;101.0236_177.5;191.0196_169.7	11	3
0.0	0.2502	InChI=1S/C25H20O5S/c1-15(2)24(27)29-18-10-11-19(20(14-18)30-25(28)16(3)4)23(26)22-13-12-21(31-22)17-8-6-5-7-9-17/h5-14H,1,3H2,2,4H3	432.103	[3-(2-methylprop-2-enoyloxy)-4-(5-phenylthiophene-2-carbonyl)phenyl] 2-methylprop-2-enoate	68164432	C25H20O5S	NA	4.056742118746103	NA	11	0
38.908591843940684	0.25	InChI=1S/C18H20N6O3S2/c1-23(11-17-19-21-22-20-17)18(25)16-9-14(28)10-24(16)29(26,27)15-7-6-12-4-2-3-5-13(12)8-15/h2-8,14,16,28H,9-11H2,1H3,(H,19,20,21,22)/t14-,16+/m1/s1	432.104	(2S,4R)-N-methyl-1-(2-naphthylsulfonyl)-4-sulfanyl-N-(2H-tetrazol-5-ylmethyl)pyrrolidine-2-carboxamide	86758902	C18H20N6O3S2	284.0316:[C11H15N2O3S2-2H]-H-	1.2624122601345598	284.0316_540.0	11	1
25.907445384629433	0.2497	InChI=1S/C19H20ClF3N2O4/c1-11-4-5-13(17(6-11)29-10-19(21,22)23)24-9-18(26)25-14-8-15(27-2)12(20)7-16(14)28-3/h4-8,24H,9-10H2,1-3H3,(H,25,26)	432.106	N-(4-chloro-2,5-dimethoxy-phenyl)-2-[4-methyl-2-(2,2,2-trifluoroethoxy)anilino]acetamide	52758286	C19H20ClF3N2O4	191.0196:[C7H7F3NO2-2H]-H-;205.073:[C9H9F3NO+H]-	2.189882358968106	191.0196_169.7;205.073_113.5	11	2
7.6090881442099025	0.2495	InChI=1S/C18H26Cl2N2O4Si/c1-18(2,3)27(4,5)26-17-16(24)15(23)14(8-25-17)22-9-21-12-6-10(19)11(20)7-13(12)22/h6-7,9,14-17,23-24H,8H2,1-5H3/t14-,15+,16+,17-/m1/s1	432.104	(2R,3S,4S,5R)-2-[tert-butyl(dimethyl)silyl]oxy-5-(5,6-dichlorobenzimidazol-1-yl)tetrahydropyran-3,4-diol	57010475	C18H26Cl2N2O4Si	59.0128:[C2H4O2]-H-;89.0232:[C3H5O3]-;101.0236:[C4H7O3-H]-H-	3.499649612209449	59.0128_188.8;89.0232_90.6;101.0236_177.5	11	3
39.98548906396882	0.249	InChI=1S/C17H25ClN4O3S2/c1-19-6-10-21(11-7-19)27(24,25)22-12-8-20(9-13-22)17(23)14-26-16-5-3-2-4-15(16)18/h2-5H,6-14H2,1H3	432.106	2-(2-chlorophenyl)sulfanyl-1-[4-(4-methylpiperazin-1-yl)sulfonylpiperazin-1-yl]ethanone	37842176	C17H25ClN4O3S2	284.0316:[C11H14N2O3S2-H]-H-	1.1694250251707377	284.0316_540.0	11	1
25.502066909687706	0.2489	InChI=1S/C19H20ClF3N2O4/c1-4-29-15-6-5-12(7-16(15)28-3)11(2)24-17(26)10-25-9-13(19(21,22)23)8-14(20)18(25)27/h5-9,11H,4,10H2,1-3H3,(H,24,26)/t11-/m0/s1	432.106	2-[3-chloro-2-oxo-5-(trifluoromethyl)-1-pyridyl]-N-[(1S)-1-(4-ethoxy-3-methoxy-phenyl)ethyl]acetamide	99456257	C19H20ClF3N2O4	100.9666:[C3HClNO]-H-;191.0196:[C7H5F3NO2]-H-;205.073:[C11H13NO3-H]-H-	2.20692410017141	100.9666_99.2;191.0196_169.7;205.073_113.5	11	3
22.54013285808234	0.2488	InChI=1S/C19H20ClF3N2O4/c1-11(2)29-16-14(20)7-13(8-15(16)27-3)17(26)25-9-12-5-4-6-24-18(12)28-10-19(21,22)23/h4-8,11H,9-10H2,1-3H3,(H,25,26)	432.106	3-chloro-4-isopropoxy-5-methoxy-N-[[2-(2,2,2-trifluoroethoxy)-3-pyridyl]methyl]benzamide	40295475	C19H20ClF3N2O4	191.0196:[C7H6F3NO2-H]-H-;205.073:[C11H13NO3-H]-H-	2.4174170230561822	191.0196_169.7;205.073_113.5	11	2
25.038681680021305	0.2484	InChI=1S/C20H15F3N4O4/c1-11-3-8-15-14(9-11)17(28)26(2)19-25-24-16(27(15)19)10-30-18(29)12-4-6-13(7-5-12)31-20(21,22)23/h3-9H,10H2,1-2H3	432.105	(4,7-dimethyl-5-oxo-[1,2,4]triazolo[4,3-a]quinazolin-1-yl)methyl 4-(trifluoromethoxy)benzoate	55731789	C20H15F3N4O4	59.0128:[C2H2O2+H]-;125.0244:[C4H2N3O2+H]-;191.0196:[C7H5N4O3-H]-H-;205.073:[C9H7N4O2+2H]-	2.2314563616932803	59.0128_188.8;125.0244_187.2;191.0196_169.7;205.073_113.5	11	4
36.44162015439255	0.2484	InChI=1S/C23H17FN4O2S/c24-18-11-13-19(14-12-18)28-21(16-7-3-1-4-8-16)26-27-23(28)31-15-20(29)25-22(30)17-9-5-2-6-10-17/h1-14H,15H2,(H,25,29,30)	432.106	N-[2-[[4-(4-fluorophenyl)-5-phenyl-1,2,4-triazol-3-yl]sulfanyl]acetyl]benzamide	16569553	C23H17FN4O2S	284.0316:[C14H10FN3OS-2H]-H-	1.41268017146697	284.0316_540.0	11	1
27.213832697614762	0.247	InChI=1S/C20H15F3N4O4/c21-20(22,23)31-15-8-6-14(7-9-15)27-11-13(10-16(27)28)18-25-26-19(30-18)24-17(29)12-4-2-1-3-5-12/h1-9,13H,10-11H2,(H,24,26,29)/t13-/m1/s1	432.105	N-[5-[(3R)-5-oxo-1-[4-(trifluoromethoxy)phenyl]pyrrolidin-3-yl]-1,3,4-oxadiazol-2-yl]benzamide	92884675	C20H15F3N4O4	125.0244:[C4H2N3O2+H]-;191.0196:[C7H6N4O3-2H]-H-;205.073:[C11H9NO3+2H]-	2.052304671718273	125.0244_187.2;191.0196_169.7;205.073_113.5	11	3
37.4689810749865	0.2468	InChI=1S/C18H20N6O3S2/c25-18(21-11-14-6-7-16(20-10-14)23-13-19-12-22-23)15-4-1-2-8-24(15)29(26,27)17-5-3-9-28-17/h3,5-7,9-10,12-13,15H,1-2,4,8,11H2,(H,21,25)/t15-/m0/s1	432.104	(2S)-1-(2-thienylsulfonyl)-N-[[6-(1,2,4-triazol-1-yl)-3-pyridyl]methyl]piperidine-2-carboxamide	99484305	C18H20N6O3S2	284.0316:[C11H13N2O3S2]-H-	1.312886742770694	284.0316_540.0	11	1
37.4689810749865	0.2461	InChI=1S/C18H20N6O3S2/c25-18(19-12-16-2-1-11-28-16)14-7-9-23(10-8-14)29(26,27)17-5-3-15(4-6-17)24-13-20-21-22-24/h1-6,11,13-14H,7-10,12H2,(H,19,25)	432.104	1-[4-(tetrazol-1-yl)phenyl]sulfonyl-N-(2-thienylmethyl)piperidine-4-carboxamide	3747626	C18H20N6O3S2	284.0316:[C11H13N2O3S2]-H-	1.3020292117617818	284.0316_540.0	11	1
20.663128252715193	0.2458	InChI=1S/C19H20ClF3N2O4/c1-27-16-5-3-12(7-17(16)28-2)9-25-18(26)10-24-14-8-13(20)4-6-15(14)29-11-19(21,22)23/h3-8,24H,9-11H2,1-2H3,(H,25,26)	432.106	2-[5-chloro-2-(2,2,2-trifluoroethoxy)anilino]-N-[(3,4-dimethoxyphenyl)methyl]acetamide	33482759	C19H20ClF3N2O4	191.0196:[C7H7F3NO2-2H]-H-;205.073:[C9H8F3NO+2H]-	2.502947385288403	191.0196_169.7;205.073_113.5	11	2
21.459372551784686	0.2456	InChI=1S/C20H15F3N4O4/c1-26-18(29)14-7-2-3-8-15(14)27-16(24-25-19(26)27)10-31-17(28)11-30-13-6-4-5-12(9-13)20(21,22)23/h2-9H,10-11H2,1H3	432.105	(4-methyl-5-oxo-[1,2,4]triazolo[4,3-a]quinazolin-1-yl)methyl 2-[3-(trifluoromethyl)phenoxy]acetate	18288580	C20H15F3N4O4	59.0128:[C2H2O2+H]-;89.0232:[C3H4O3+H]-;101.0236:[C4H4O3+H]-;125.0244:[C4H2N3O2+H]-;205.073:[C9H7N4O2+2H]-	2.442145789718182	59.0128_188.8;89.0232_90.6;101.0236_177.5;125.0244_187.2;205.073_113.5	11	5
37.4689810749865	0.2455	InChI=1S/C18H20N6O3S2/c25-18(19-11-16-4-2-10-28-16)14-3-1-9-23(12-14)29(26,27)17-7-5-15(6-8-17)24-13-20-21-22-24/h2,4-8,10,13-14H,1,3,9,11-12H2,(H,19,25)	432.104	1-[4-(tetrazol-1-yl)phenyl]sulfonyl-N-(2-thienylmethyl)piperidine-3-carboxamide	3214820	C18H20N6O3S2	284.0316:[C11H13N2O3S2]-H-	1.2920676619722093	284.0316_540.0	11	1
37.4689810749865	0.2444	InChI=1S/C18H20N6O3S2/c25-16(22-15-5-4-8-20-18(15)24-13-19-12-21-24)11-14-6-7-17(28-14)29(26,27)23-9-2-1-3-10-23/h4-8,12-13H,1-3,9-11H2,(H,22,25)	432.104	2-[5-(1-piperidylsulfonyl)-2-thienyl]-N-[2-(1,2,4-triazol-1-yl)-3-pyridyl]acetamide	52786444	C18H20N6O3S2	284.0316:[C11H13N2O3S2]-H-	1.2746519931516325	284.0316_540.0	11	1
13.896090325765044	0.2444	InChI=1S/C21H25BrN2O3/c1-27-21(26)19-13-8-17-20-12(11-4-2-3-5-16(11)23-20)6-7-24(17)10-14(13)15(22)9-18(19)25/h2-5,13-15,17-19,23,25H,6-10H2,1H3/t13-,14-,15+,17+,18+,19-/m1/s1	432.105	methyl (1S,15S,16S,18S,19R,20S)-16-bromo-18-hydroxy-1,3,11,12,14,15,16,17,18,19,20,21-dodecahydroyohimban-19-carboxylate	100892267	C21H25BrN2O3	59.0128:[C2H3O2]-;89.0232:[C3H3O3+2H]-;101.0236:[C4H6O3]-H-;125.0244:[C6H8O3-2H]-H-	2.9659258010250857	59.0128_188.8;89.0232_90.6;101.0236_177.5;125.0244_187.2	11	4
37.4689810749865	0.2444	InChI=1S/C18H20N6O3S2/c25-17(22-14-4-6-16(20-11-14)24-13-19-12-21-24)10-15-5-7-18(28-15)29(26,27)23-8-2-1-3-9-23/h4-7,11-13H,1-3,8-10H2,(H,22,25)	432.104	2-[5-(1-piperidylsulfonyl)-2-thienyl]-N-[6-(1,2,4-triazol-1-yl)-3-pyridyl]acetamide	55560974	C18H20N6O3S2	284.0316:[C11H13N2O3S2]-H-	1.2746519931516325	284.0316_540.0	11	1
19.28691473031334	0.2441	InChI=1S/C20H15F3N4O4/c1-11-4-2-3-5-14(11)27-17(20(21,22)23)13(9-24-27)19(29)26-25-18(28)12-6-7-15-16(8-12)31-10-30-15/h2-9H,10H2,1H3,(H,25,28)(H,26,29)	432.105	N''-(1,3-benzodioxole-5-carbonyl)-1-(o-tolyl)-5-(trifluoromethyl)pyrazole-4-carbohydrazide	55605070	C20H15F3N4O4	59.0128:[C2H2O2+H]-;125.0244:[C4H3N3O2]-;191.0196:[C5H2F3N4O]-	2.57506326710464	59.0128_188.8;125.0244_187.2;191.0196_169.7	11	3
30.303408521450237	0.2439	InChI=1S/C19H20ClF3N2O4/c20-15-8-12(19(21,22)23)9-24(18(15)28)10-17(27)29-11-16(26)25(14-6-7-14)13-4-2-1-3-5-13/h4,8-9,14H,1-3,5-7,10-11H2	432.106	[2-[cyclohexen-1-yl(cyclopropyl)amino]-2-oxo-ethyl] 2-[3-chloro-2-oxo-5-(trifluoromethyl)-1-pyridyl]acetate	99149594	C19H20ClF3N2O4	59.0128:[C2H2O2+H]-;100.9666:[C3HClNO]-H-;101.0236:[C4H4O3+H]-;191.0196:[C7H4F3NO2]-;205.073:[C11H14NO3-2H]-H-	1.7814860173027323	59.0128_188.8;100.9666_99.2;101.0236_177.5;191.0196_169.7;205.073_113.5	11	5
13.103707145144574	0.243	InChI=1S/C21H25BrN2O3/c1-6-16(7-2)27-17-10-14(5)23-20-18(17)21(25)26-11-24(20)19-12(3)8-15(22)9-13(19)4/h8-10,16H,6-7,11H2,1-5H3	432.105	1-(4-bromo-2,6-dimethyl-phenyl)-5-(1-ethylpropoxy)-7-methyl-2H-pyrido[2,3-d][1,3]oxazin-4-one	9910698	C21H25BrN2O3	59.0128:[C2H2O2+H]-;205.073:[C11H12NO3]-H-	3.0004784055687814	59.0128_188.8;205.073_113.5	11	2
24.80285668484546	0.2429	InChI=1S/C19H20ClF3N2O4/c1-4-25(10-12-5-6-15(27-2)16(7-12)28-3)18(26)13-8-14(20)17(24-9-13)29-11-19(21,22)23/h5-9H,4,10-11H2,1-3H3	432.106	5-chloro-N-[(3,4-dimethoxyphenyl)methyl]-N-ethyl-6-(2,2,2-trifluoroethoxy)pyridine-3-carboxamide	55741315	C19H20ClF3N2O4	100.9666:[C3HClNO]-H-;191.0196:[C7H4F3NO2]-;205.073:[C11H13NO3-H]-H-	2.159061852298923	100.9666_99.2;191.0196_169.7;205.073_113.5	11	3
25.673550748050715	0.2422	InChI=1S/C19H20ClF3N2O4/c1-4-25(5-2)29-18(26)12(3)27-14-6-8-15(9-7-14)28-17-16(20)10-13(11-24-17)19(21,22)23/h6-12H,4-5H2,1-3H3	432.106	diethylamino 2-[4-[[3-chloro-5-(trifluoromethyl)-2-pyridyl]oxy]phenoxy]propanoate	13690697	C19H20ClF3N2O4	89.0232:[C3H4O3+H]-;100.9666:[C3HClNO]-H-;101.0236:[C4H4O3+H]-;125.0244:[C6H6O3]-H-;205.073:[C11H13NO3-H]-H-	2.0859560135355526	89.0232_90.6;100.9666_99.2;101.0236_177.5;125.0244_187.2;205.073_113.5	11	5
32.43414262759294	0.2421	InChI=1S/C23H17FN4O2S/c24-17-5-2-1-4-14(17)10-21-27-18-8-7-15(11-19(18)28-21)25-22(29)12-16-13-31-23(26-16)20-6-3-9-30-20/h1-9,11,13H,10,12H2,(H,25,29)(H,27,28)	432.106	N-[2-[(2-fluorophenyl)methyl]-3H-benzimidazol-5-yl]-2-[2-(2-furyl)thiazol-4-yl]acetamide	52661374	C23H17FN4O2S	284.0316:[C14H10FN3OS-2H]-H-	1.5991671503268088	284.0316_540.0	11	1
22.95254030830002	0.2418	InChI=1S/C20H15F3N4O4/c1-30-14-9-7-12(8-10-14)16-26-25-15(31-16)11-27-17(28)19(20(21,22)23,24-18(27)29)13-5-3-2-4-6-13/h2-10H,11H2,1H3,(H,24,29)/t19-/m1/s1	432.105	(5R)-3-[[5-(4-methoxyphenyl)-1,3,4-oxadiazol-2-yl]methyl]-5-phenyl-5-(trifluoromethyl)imidazolidine-2,4-dione	99397018	C20H15F3N4O4	125.0244:[C4H2N3O2+H]-;191.0196:[C7H4N4O3]-H-;205.073:[C9H7N4O2+2H]-	2.2742901822073995	125.0244_187.2;191.0196_169.7;205.073_113.5	11	3
37.869995410102874	0.2418	InChI=1S/C18H20N6O3S2/c25-17(12-14-3-5-16(6-4-14)24-13-19-21-22-24)23-9-7-15(8-10-23)20-29(26,27)18-2-1-11-28-18/h1-6,11,13,15,20H,7-10,12H2	432.104	N-[1-[2-[4-(tetrazol-1-yl)phenyl]acetyl]-4-piperidyl]thiophene-2-sulfonamide	55632934	C18H20N6O3S2	284.0316:[C11H12N2O3S2]-	1.203438961982029	284.0316_540.0	11	1
27.033316293170856	0.2417	InChI=1S/C19H20ClF3N2O4/c1-4-24(9-12-5-6-15(28-2)16(7-12)29-3)17(26)11-25-10-13(19(21,22)23)8-14(20)18(25)27/h5-8,10H,4,9,11H2,1-3H3	432.106	2-[3-chloro-2-oxo-5-(trifluoromethyl)-1-pyridyl]-N-[(3,4-dimethoxyphenyl)methyl]-N-ethyl-acetamide	27926295	C19H20ClF3N2O4	100.9666:[C3HClNO]-H-;191.0196:[C7H4F3NO2]-;205.073:[C11H13NO3-H]-H-	1.979347404565456	100.9666_99.2;191.0196_169.7;205.073_113.5	11	3
36.92221586921183	0.2409	InChI=1S/C18H20N6O3S2/c1-13-5-6-14(11-16(13)29(26,27)23-8-3-2-4-9-23)20-18(25)17-15(7-10-28-17)24-12-19-21-22-24/h5-7,10-12H,2-4,8-9H2,1H3,(H,20,25)	432.104	N-[4-methyl-3-(1-piperidylsulfonyl)phenyl]-3-(tetrazol-1-yl)thiophene-2-carboxamide	55684378	C18H20N6O3S2	284.0316:[C11H11N2O3S2+H]-	1.2573464110195092	284.0316_540.0	11	1
8.112066923434345	0.2395	InChI=1S/C25H20O5S/c26-25-15-19(23-13-17-5-4-6-18(17)14-24(23)30-25)16-29-20-9-11-22(12-10-20)31(27,28)21-7-2-1-3-8-21/h1-3,7-15H,4-6,16H2	432.103	4-[[4-(benzenesulfonyl)phenoxy]methyl]-7,8-dihydro-6H-cyclopenta[g]chromen-2-one	60459854	C25H20O5S	101.0236:[C4H3O3+2H]-;125.0244:[C6H3O3+2H]-	3.3018969666617233	101.0236_177.5;125.0244_187.2	11	2
37.4689810749865	0.2392	InChI=1S/C18H20N6O3S2/c25-17(20-14-4-6-15(7-5-14)24-13-19-21-22-24)12-16-8-9-18(28-16)29(26,27)23-10-2-1-3-11-23/h4-9,13H,1-3,10-12H2,(H,20,25)	432.104	2-[5-(1-piperidylsulfonyl)-2-thienyl]-N-[4-(tetrazol-1-yl)phenyl]acetamide	16295439	C18H20N6O3S2	284.0316:[C11H13N2O3S2]-H-	1.1900176343839182	284.0316_540.0	11	1
1.6922696542693398	0.2388	InChI=1S/C25H20O5S/c1-2-30-23(26)14-13-18-17-22(24(27)28)31-21(18)15-16-25(29,19-9-5-3-6-10-19)20-11-7-4-8-12-20/h3-14,17,29H,2H2,1H3,(H,27,28)	432.103	4-(3-ethoxy-3-oxo-prop-1-enyl)-5-(3-hydroxy-3,3-diphenyl-prop-1-ynyl)thiophene-2-carboxylic acid	91545409	C25H20O5S	59.0128:[C2H2O2+H]-	3.750798639767176	59.0128_188.8	11	1
37.332184630955666	0.2382	InChI=1S/C18H20N6O3S2/c25-18(21-17-3-6-23(22-17)13-14-1-4-19-5-2-14)16-11-15(12-20-16)29(26,27)24-7-9-28-10-8-24/h1-6,11-12,20H,7-10,13H2,(H,21,22,25)	432.104	N-[1-(4-pyridylmethyl)pyrazol-3-yl]-4-thiomorpholinosulfonyl-1H-pyrrole-2-carboxamide	56275668	C18H20N6O3S2	284.0316:[C11H11N2O3S2+H]-	1.1843138869576608	284.0316_540.0	11	1
24.16642021259844	0.238	InChI=1S/C20H15F3N4O4/c1-19(12-3-6-14(28)7-4-12)17(30)27(18(31)26(19)10-16(25)29)13-5-2-11(9-24)15(8-13)20(21,22)23/h2-8,28H,10H2,1H3,(H2,25,29)	432.105	2-[3-[4-cyano-3-(trifluoromethyl)phenyl]-5-(4-hydroxyphenyl)-5-methyl-2,4-dioxo-imidazolidin-1-yl]acetamide	59448772	C20H15F3N4O4	125.0244:[C4H4N3O2]-H-;191.0196:[C7H2F3NO2+2H]-;205.073:[C11H10NO3+H]-	2.1254044175028803	125.0244_187.2;191.0196_169.7;205.073_113.5	11	3
37.4689810749865	0.2365	InChI=1S/C18H20N6O3S2/c25-18(17-10-13-6-3-1-2-4-9-16(13)28-17)20-23-29(26,27)15-8-5-7-14(11-15)24-12-19-21-22-24/h5,7-8,10-12,23H,1-4,6,9H2,(H,20,25)	432.104	N''-[3-(tetrazol-1-yl)phenyl]sulfonyl-4,5,6,7,8,9-hexahydrocycloocta[b]thiophene-2-carbohydrazide	56078929	C18H20N6O3S2	284.0316:[C11H13N2O3S2]-H-	1.1466951704919874	284.0316_540.0	11	1
22.95254030830002	0.236	InChI=1S/C20H15F3N4O4/c1-30-14-9-5-6-12(10-14)16-24-15(31-26-16)11-27-17(28)19(20(21,22)23,25-18(27)29)13-7-3-2-4-8-13/h2-10H,11H2,1H3,(H,25,29)	432.105	3-[[3-(3-methoxyphenyl)-1,2,4-oxadiazol-5-yl]methyl]-5-phenyl-5-(trifluoromethyl)imidazolidine-2,4-dione	56474057	C20H15F3N4O4	125.0244:[C4H2N3O2+H]-;191.0196:[C7H4N4O3]-H-;205.073:[C9H7N4O2+2H]-	2.1800095682522485	125.0244_187.2;191.0196_169.7;205.073_113.5	11	3
26.67664017234297	0.2358	InChI=1S/C19H20ClF3N2O4/c1-24(7-6-12-4-5-15(28-2)16(8-12)29-3)17(26)11-25-10-13(19(21,22)23)9-14(20)18(25)27/h4-5,8-10H,6-7,11H2,1-3H3	432.106	2-[3-chloro-2-oxo-5-(trifluoromethyl)-1-pyridyl]-N-[2-(3,4-dimethoxyphenyl)ethyl]-N-methyl-acetamide	45609707	C19H20ClF3N2O4	100.9666:[C3HClNO]-H-;191.0196:[C7H4F3NO2]-;205.073:[C11H13NO3-H]-H-	1.9091125921901377	100.9666_99.2;191.0196_169.7;205.073_113.5	11	3
36.92221586921183	0.2348	InChI=1S/C18H20N6O3S2/c25-18(17-16(8-11-28-17)24-13-19-21-22-24)20-14-6-5-7-15(12-14)29(26,27)23-9-3-1-2-4-10-23/h5-8,11-13H,1-4,9-10H2,(H,20,25)	432.104	N-[3-(azepan-1-ylsulfonyl)phenyl]-3-(tetrazol-1-yl)thiophene-2-carboxamide	55645779	C18H20N6O3S2	284.0316:[C11H11N2O3S2+H]-	1.1583671345226103	284.0316_540.0	11	1
29.998905609612738	0.2335	InChI=1S/C19H20ClF3N2O4/c20-13-3-4-15(14(9-13)19(21,22)23)24-16(26)10-29-18(28)12-5-7-25(8-6-12)17(27)11-1-2-11/h3-4,9,11-12H,1-2,5-8,10H2,(H,24,26)	432.106	[2-[4-chloro-2-(trifluoromethyl)anilino]-2-oxo-ethyl] 1-(cyclopropanecarbonyl)piperidine-4-carboxylate	32467702	C19H20ClF3N2O4	59.0128:[C2H2O2+H]-;89.0232:[C3H3O3+2H]-;101.0236:[C4H4O3+H]-;125.0244:[C6H8O3-2H]-H-;191.0196:[C7H5F3NO2]-H-;205.073:[C11H14NO3-2H]-H-	1.6343868739514198	59.0128_188.8;89.0232_90.6;101.0236_177.5;125.0244_187.2;191.0196_169.7;205.073_113.5	11	6
22.95254030830002	0.2335	InChI=1S/C20H15F3N4O4/c1-30-14-9-7-12(8-10-14)16-24-15(26-31-16)11-27-17(28)19(20(21,22)23,25-18(27)29)13-5-3-2-4-6-13/h2-10H,11H2,1H3,(H,25,29)	432.105	3-[[5-(4-methoxyphenyl)-1,2,4-oxadiazol-3-yl]methyl]-5-phenyl-5-(trifluoromethyl)imidazolidine-2,4-dione	56475083	C20H15F3N4O4	125.0244:[C4H2N3O2+H]-;191.0196:[C7H4N4O3]-H-;205.073:[C9H7N4O2+2H]-	2.1388184753707042	125.0244_187.2;191.0196_169.7;205.073_113.5	11	3
0.0	0.2325	InChI=1S/C22H19ClF2N2O3/c1-29-20-5-13(4-14-9-26-22-17(14)7-16(28)10-27-22)19(25)8-21(20)30-11-12-2-3-15(23)6-18(12)24/h2-3,5,7-10,18,28H,4,6,11H2,1H3,(H,26,27)	432.105	3-[[4-[(4-chloro-6-fluoro-cyclohexa-1,3-dien-1-yl)methoxy]-2-fluoro-5-methoxy-phenyl]methyl]-1H-pyrrolo[2,3-b]pyridin-5-ol	71085331	C22H19ClF2N2O3	NA	3.770361027617412	NA	11	0
18.565365920802094	0.2324	InChI=1S/C20H15F3N4O4/c1-10(31-19(30)11-2-3-12-8-24-26-14(12)6-11)18(29)27-9-17(28)25-15-7-13(20(21,22)23)4-5-16(15)27/h2-8,10H,9H2,1H3,(H,24,26)(H,25,28)/t10-/m0/s1	432.105	[(1S)-1-methyl-2-oxo-2-[3-oxo-6-(trifluoromethyl)-2,4-dihydroquinoxalin-1-yl]ethyl] 1H-indazole-6-carboxylate	33061922	C20H15F3N4O4	101.0236:[C4H4O3+H]-;125.0244:[C6H5O3]-;205.073:[C11H9NO3+2H]-	2.435756577101399	101.0236_177.5;125.0244_187.2;205.073_113.5	11	3
36.06928386901134	0.232	InChI=1S/C18H20N6O3S2/c25-17(15-11-28-18(22-15)16-19-12-20-23-16)21-13-6-5-7-14(10-13)29(26,27)24-8-3-1-2-4-9-24/h5-7,10-12H,1-4,8-9H2,(H,21,25)(H,19,20,23)	432.104	N-[3-(azepan-1-ylsulfonyl)phenyl]-2-(1H-1,2,4-triazol-5-yl)thiazole-4-carboxamide	99367384	C18H20N6O3S2	284.0316:[C11H10N2O3S2+2H]-	1.1737982598186523	284.0316_540.0	11	1
26.13440750836012	0.2313	InChI=1S/C18H20N6O3S2/c1-3-23(13(25)10-28-18-22-21-11(2)29-18)14-15(19)24(17(27)20-16(14)26)9-12-7-5-4-6-8-12/h4-8H,3,9-10,19H2,1-2H3,(H,20,26,27)	432.104	N-(6-amino-1-benzyl-2,4-dioxo-pyrimidin-5-yl)-N-ethyl-2-[(5-methyl-1,3,4-thiadiazol-2-yl)sulfanyl]acetamide	4815436	C18H20N6O3S2	125.0244:[C4H3N3O2]-;191.0196:[C5H7N3OS2+2H]-;205.073:[C9H11N4O2-H]-H-	1.8751505000031157	125.0244_187.2;191.0196_169.7;205.073_113.5	11	3
19.458040387428355	0.2302	InChI=1S/C20H15F3N4O4/c21-20(22,23)11-31-16-5-4-15(7-14(16)8-24)26-18(29)13-3-1-2-12(6-13)10-27-17(28)9-25-19(27)30/h1-7H,9-11H2,(H,25,30)(H,26,29)	432.105	N-[3-cyano-4-(2,2,2-trifluoroethoxy)phenyl]-3-[(2,5-dioxoimidazolidin-1-yl)methyl]benzamide	99474461	C20H15F3N4O4	191.0196:[C7H5F3NO2]-H-;205.073:[C11H9NO3+2H]-	2.336128125610708	191.0196_169.7;205.073_113.5	11	2
13.716201863082256	0.2301	InChI=1S/C21H25BrN2O3/c1-25-17-11-13(12-18(26-2)21(17)27-3)19-14(7-4-5-10-23)15-8-6-9-16(22)20(15)24-19/h6,8-9,11-12,24H,4-5,7,10,23H2,1-3H3	432.105	4-[7-bromo-2-(3,4,5-trimethoxyphenyl)-1H-indol-3-yl]butan-1-amine	4323163	C21H25BrN2O3	125.0244:[C6H7O3-H]-H-;205.073:[C11H12NO3]-H-	2.747172444618558	125.0244_187.2;205.073_113.5	11	2
13.716201863082256	0.2301	InChI=1S/C21H25BrN2O3/c1-25-18-10-13(11-19(26-2)21(18)27-3)20-15(6-4-5-9-23)16-12-14(22)7-8-17(16)24-20/h7-8,10-12,24H,4-6,9,23H2,1-3H3	432.105	4-[5-bromo-2-(3,4,5-trimethoxyphenyl)-1H-indol-3-yl]butan-1-amine	3933202	C21H25BrN2O3	125.0244:[C6H7O3-H]-H-;205.073:[C11H12NO3]-H-	2.747172444618558	125.0244_187.2;205.073_113.5	11	2
10.020271141654566	0.2295	InChI=1S/C20H15F3N4O4/c1-2-27-15-5-3-11(8-14(15)26-18(29)19(27)30)17(28)25-13-4-6-16(12(7-13)9-24)31-10-20(21,22)23/h3-8H,2,10H2,1H3,(H,25,28)(H,26,29)	432.105	N-[3-cyano-4-(2,2,2-trifluoroethoxy)phenyl]-1-ethyl-2,3-dioxo-4H-quinoxaline-6-carboxamide	46478063	C20H15F3N4O4	191.0196:[C7H5F3NO2]-H-	3.00207362308537	191.0196_169.7	11	1
17.693652906993346	0.2288	InChI=1S/C20H15F3N4O4/c1-30-16-5-3-12(9-14(16)20(21,22)23)19-25-18(26-31-19)11-2-4-15-13(8-11)10-24-27(15)7-6-17(28)29/h2-5,8-10H,6-7H2,1H3,(H,28,29)	432.105	3-[5-[5-[4-methoxy-3-(trifluoromethyl)phenyl]-1,2,4-oxadiazol-3-yl]indazol-1-yl]propanoic acid	25063087	C20H15F3N4O4	59.0128:[C2H3O2]-;191.0196:[C7H4F3NO2]-;205.073:[C9H7N4O2+2H]-	2.4399677582453996	59.0128_188.8;191.0196_169.7;205.073_113.5	11	3
11.57681632515611	0.2269	InChI=1S/C25H20O5S/c26-25(29-17-19-11-13-21(14-12-19)20-7-3-1-4-8-20)24-16-15-22(30-24)18-31(27,28)23-9-5-2-6-10-23/h1-16H,17-18H2	432.103	(4-phenylphenyl)methyl 5-(benzenesulfonylmethyl)furan-2-carboxylate	24396889	C25H20O5S	59.0128:[C2H2O2+H]-;101.0236:[C4H3O3+2H]-;125.0244:[C6H4O3+H]-	2.848499067632175	59.0128_188.8;101.0236_177.5;125.0244_187.2	11	3
6.971514274186365	0.2269	InChI=1S/C25H20O5S/c26-25(30-23-14-8-7-11-20(23)17-19-9-3-1-4-10-19)24-16-15-21(29-24)18-31(27,28)22-12-5-2-6-13-22/h1-16H,17-18H2	432.103	(2-benzylphenyl) 5-(benzenesulfonylmethyl)furan-2-carboxylate	24392748	C25H20O5S	125.0244:[C6H4O3+H]-	3.179753211715046	125.0244_187.2	11	1
15.677967690412462	0.2267	InChI=1S/C21H25BrN2O3/c1-4-24(3)20(15-8-6-5-7-9-15)21(25)23-14(2)16-12-18-19(13-17(16)22)27-11-10-26-18/h5-9,12-14,20H,4,10-11H2,1-3H3,(H,23,25)	432.105	N-[1-(6-bromo-2,3-dihydro-1,4-benzodioxin-7-yl)ethyl]-2-[ethyl(methyl)amino]-2-phenyl-acetamide	56473328	C21H25BrN2O3	59.0128:[C2H4O2]-H-;205.073:[C11H11NO3]-	2.550795870870582	59.0128_188.8;205.073_113.5	11	2
33.41940639833567	0.2262	InChI=1S/C18H20N6O3S2/c25-18(21-12-14-2-3-17(20-11-14)24-5-1-4-22-24)16-10-15(13-19-16)29(26,27)23-6-8-28-9-7-23/h1-5,10-11,13,19H,6-9,12H2,(H,21,25)	432.104	N-[(6-pyrazol-1-yl-3-pyridyl)methyl]-4-thiomorpholinosulfonyl-1H-pyrrole-2-carboxamide	56130248	C18H20N6O3S2	284.0316:[C11H13N2O3S2]-H-	1.2699976954537349	284.0316_540.0	11	1
17.202700963623094	0.2261	InChI=1S/C20H15F3N4O4/c21-20(22,23)19-25-13-6-2-4-8-15(13)27(19)10-18(30)31-11-17(29)26-9-16(28)24-12-5-1-3-7-14(12)26/h1-8H,9-11H2,(H,24,28)	432.105	[2-oxo-2-(3-oxo-2,4-dihydroquinoxalin-1-yl)ethyl] 2-[2-(trifluoromethyl)benzimidazol-1-yl]acetate	3487069	C20H15F3N4O4	59.0128:[C2H2O2+H]-;101.0236:[C4H4O3+H]-;205.073:[C11H10NO3+H]-	2.4321350282561434	59.0128_188.8;101.0236_177.5;205.073_113.5	11	3
17.04714064114119	0.2255	InChI=1S/C21H25BrN2O3/c1-2-26-18-7-16(11-23)6-17(22)20(18)27-12-19(25)24-21-8-13-3-14(9-21)5-15(4-13)10-21/h6-7,13-15H,2-5,8-10,12H2,1H3,(H,24,25)	432.105	N-(1-adamantyl)-2-(2-bromo-4-cyano-6-ethoxy-phenoxy)acetamide	38404690	C21H25BrN2O3	59.0128:[C2H3O2]-;125.0244:[C6H8O3-2H]-H-;205.073:[C11H10NO3+H]-	2.4333021485836177	59.0128_188.8;125.0244_187.2;205.073_113.5	11	3
33.412994634950174	0.2253	InChI=1S/C18H20N6O3S2/c1-22-18(19-20-21-22)28-13-17(25)23-8-10-24(11-9-23)29(26,27)16-7-6-14-4-2-3-5-15(14)12-16/h2-7,12H,8-11,13H2,1H3	432.104	2-(1-methyltetrazol-5-yl)sulfanyl-1-[4-(2-naphthylsulfonyl)piperazin-1-yl]ethanone	42965374	C18H20N6O3S2	284.0316:[C11H13N2O3S2]-H-	1.255656663786041	284.0316_540.0	11	1
9.731259989881496	0.2246	InChI=1S/C20H15F3N4O4/c1-11-16-13(8-14(15-5-3-7-29-15)26-19(16)31-27-11)17(28)25-9-12-4-2-6-24-18(12)30-10-20(21,22)23/h2-8H,9-10H2,1H3,(H,25,28)	432.105	6-(2-furyl)-3-methyl-N-[[2-(2,2,2-trifluoroethoxy)-3-pyridyl]methyl]isoxazolo[5,4-b]pyridine-4-carboxamide	55614030	C20H15F3N4O4	191.0196:[C7H6F3NO2-H]-H-	2.9442145246720566	191.0196_169.7	11	1
12.811107905769562	0.224	InChI=1S/C20H15F3N4O4/c21-20(22,23)16-15(25-19(31-16)11-4-2-1-3-5-11)18(30)24-12-6-7-14-13(10-12)17(29)26-27(14)8-9-28/h1-7,10,28H,8-9H2,(H,24,30)(H,26,29)	432.105	N-[1-(2-hydroxyethyl)-3-oxo-2H-indazol-5-yl]-2-phenyl-5-(trifluoromethyl)oxazole-4-carboxamide	57621387	C20H15F3N4O4	191.0196:[C10H5F2NO-H]-H-	2.7128050818461067	191.0196_169.7	11	1
13.103707145144574	0.2237	InChI=1S/C21H25BrN2O3/c1-5-6-7-8-26-17-11-15(4)23-20-18(17)21(25)27-12-24(20)19-13(2)9-16(22)10-14(19)3/h9-11H,5-8,12H2,1-4H3	432.105	1-(4-bromo-2,6-dimethyl-phenyl)-7-methyl-5-pentoxy-2H-pyrido[2,3-d][1,3]oxazin-4-one	57162073	C21H25BrN2O3	59.0128:[C2H2O2+H]-;205.073:[C11H12NO3]-H-	2.6866540296972845	59.0128_188.8;205.073_113.5	11	2
33.41940639833567	0.2236	InChI=1S/C18H20N6O3S2/c1-23-12-20-22-17(23)13-3-2-4-14(9-13)21-18(25)16-10-15(11-19-16)29(26,27)24-5-7-28-8-6-24/h2-4,9-12,19H,5-8H2,1H3,(H,21,25)	432.104	N-[3-(4-methyl-1,2,4-triazol-3-yl)phenyl]-4-thiomorpholinosulfonyl-1H-pyrrole-2-carboxamide	56133005	C18H20N6O3S2	284.0316:[C11H12N2O3S2]-	1.2287613717260482	284.0316_540.0	11	1
13.092250664707098	0.2231	InChI=1S/C20H15F3N4O4/c1-29-15-9-5-2-6-12(15)18-25-16(31-26-18)11-30-17(28)10-27-14-8-4-3-7-13(14)24-19(27)20(21,22)23/h2-9H,10-11H2,1H3	432.105	[3-(2-methoxyphenyl)-1,2,4-oxadiazol-5-yl]methyl 2-[2-(trifluoromethyl)benzimidazol-1-yl]acetate	18282054	C20H15F3N4O4	59.0128:[C2H2O2+H]-;101.0236:[C4H4O3+H]-;205.073:[C11H9NO3+2H]-	2.678422688929468	59.0128_188.8;101.0236_177.5;205.073_113.5	11	3
13.092250664707098	0.2231	InChI=1S/C20H15F3N4O4/c1-29-13-8-6-12(7-9-13)18-25-16(31-26-18)11-30-17(28)10-27-15-5-3-2-4-14(15)24-19(27)20(21,22)23/h2-9H,10-11H2,1H3	432.105	[3-(4-methoxyphenyl)-1,2,4-oxadiazol-5-yl]methyl 2-[2-(trifluoromethyl)benzimidazol-1-yl]acetate	29436938	C20H15F3N4O4	59.0128:[C2H2O2+H]-;101.0236:[C4H4O3+H]-;205.073:[C11H9NO3+2H]-	2.678422688929468	59.0128_188.8;101.0236_177.5;205.073_113.5	11	3
2.4966431022725177	0.2228	InChI=1S/C25H20O5S/c1-28-20-13-14-21-22(16-20)31(27)25(18-6-4-3-5-7-18)24(21)30-19-11-8-17(9-12-19)10-15-23(26)29-2/h3-16H,1-2H3	432.103	methyl 3-[4-(6-methoxy-1-oxo-2-phenyl-benzothiophen-3-yl)oxyphenyl]prop-2-enoate	123805843	C25H20O5S	59.0128:[C2H3O2]-	3.433262554848819	59.0128_188.8	11	1
18.092882278435013	0.2222	InChI=1S/C21H25BrN2O3/c1-26-13-14-27-20-8-7-18(22)15-19(20)21(25)24-11-9-23(10-12-24)16-17-5-3-2-4-6-17/h2-8,15H,9-14,16H2,1H3	432.105	(4-benzylpiperazin-1-yl)-[5-bromo-2-(2-methoxyethoxy)phenyl]methanone	17174728	C21H25BrN2O3	59.0128:[C2H4O2]-H-;125.0244:[C6H7O3-H]-H-;205.073:[C11H12NO3]-H-	2.305547404837208	59.0128_188.8;125.0244_187.2;205.073_113.5	11	3
19.533607017189816	0.222	InChI=1S/C20H15F3N4O4/c1-25-15-5-3-4-6-16(15)26(2)19(25)13(10-24)17(28)11-31-18-8-7-12(27(29)30)9-14(18)20(21,22)23/h3-9H,11H2,1-2H3	432.105	2-(1,3-dimethylbenzimidazol-2-ylidene)-4-[4-nitro-2-(trifluoromethyl)phenoxy]-3-oxo-butanenitrile	60586249	C20H15F3N4O4	59.0128:[C2H2O2+H]-;191.0196:[C7H3F3NO2+H]-	2.197800354499672	59.0128_188.8;191.0196_169.7	11	2
32.43414262759294	0.2216	InChI=1S/C18H18ClFN8S/c19-11-2-1-3-13(15(11)20)28(23)17(27-22)10-6-9(7-25-16(10)21)18-26-12-4-5-24-8-14(12)29-18/h1-3,6-7,24H,4-5,8,22-23H2,(H2,21,25)/b27-17-	432.105	N,N'',2-triamino-N-(3-chloro-2-fluoro-phenyl)-5-(4,5,6,7-tetrahydrothiazolo[5,4-c]pyridin-2-yl)pyridine-3-carboxamidine	89126358	C18H18ClFN8S	284.0316:[C11H8ClFN4S+2H]-	1.2662589803554813	284.0316_540.0	11	1
16.35406765778366	0.2209	InChI=1S/C21H25BrN2O3/c22-16-4-3-7-18(14-16)26-15-19-8-9-20(27-19)21(25)24-12-10-23(11-13-24)17-5-1-2-6-17/h3-4,7-9,14,17H,1-2,5-6,10-13,15H2	432.105	[5-[(3-bromophenoxy)methyl]-2-furyl]-(4-cyclopentylpiperazin-1-yl)methanone	55774486	C21H25BrN2O3	59.0128:[C2H2O2+H]-;125.0244:[C6H4O3+H]-;205.073:[C11H12NO3]-H-	2.409352427099121	59.0128_188.8;125.0244_187.2;205.073_113.5	11	3
16.35406765778366	0.2209	InChI=1S/C21H25BrN2O3/c22-16-5-7-18(8-6-16)26-15-19-9-10-20(27-19)21(25)24-13-11-23(12-14-24)17-3-1-2-4-17/h5-10,17H,1-4,11-15H2	432.105	[5-[(4-bromophenoxy)methyl]-2-furyl]-(4-cyclopentylpiperazin-1-yl)methanone	55774487	C21H25BrN2O3	59.0128:[C2H2O2+H]-;125.0244:[C6H4O3+H]-;205.073:[C11H12NO3]-H-	2.409352427099121	59.0128_188.8;125.0244_187.2;205.073_113.5	11	3
0.0	0.2207	InChI=1S/C25H18ClFN2O2/c1-13-2-3-14(10-20(13)26)8-15-9-18-21(16-4-6-17(27)7-5-16)19-12-29-25(31)22(19)24(30)23(18)28-11-15/h2-7,9-11,30H,8,12H2,1H3,(H,29,31)	432.104	3-[(3-chloro-4-methyl-phenyl)methyl]-5-(4-fluorophenyl)-9-hydroxy-6,7-dihydropyrrolo[3,4-g]quinolin-8-one	68256151	C25H18ClFN2O2	NA	3.579156819411703	NA	11	0
18.61429932914357	0.2201	InChI=1S/C20H15F3N4O4/c21-20(22,23)31-15-8-6-14(7-9-15)24-17(28)12-27-18(29)11-10-16(26-27)19(30)25-13-4-2-1-3-5-13/h1-11H,12H2,(H,24,28)(H,25,30)	432.105	6-oxo-1-[2-oxo-2-[4-(trifluoromethoxy)anilino]ethyl]-N-phenyl-pyridazine-3-carboxamide	26845067	C20H15F3N4O4	125.0244:[C4H4N3O2]-H-;191.0196:[C7H6N4O3-2H]-H-	2.233595409653818	125.0244_187.2;191.0196_169.7	11	2
13.796947958753904	0.2193	InChI=1S/C23H14F2N4O3/c24-16-8-9-17(25)21-20(16)22(30)15(23(31)32)12-28(21)11-14-5-3-7-19(27-14)29-18-6-2-1-4-13(18)10-26-29/h1-10,12H,11H2,(H,31,32)	432.103	5,8-difluoro-1-[(6-indazol-1-yl-2-pyridyl)methyl]-4-oxo-quinoline-3-carboxylic acid	44477240	C23H14F2N4O3	191.0196:[C10H5F2NO-H]-H-	2.5667071238168147	191.0196_169.7	11	1
14.374467410203962	0.2193	InChI=1S/C20H15F3N4O4/c21-20(22,23)19(12-6-2-1-3-7-12)17(30)27(18(31)25-19)11-16(29)26-10-15(28)24-13-8-4-5-9-14(13)26/h1-9H,10-11H2,(H,24,28)(H,25,31)	432.105	3-[2-oxo-2-(3-oxo-2,4-dihydroquinoxalin-1-yl)ethyl]-5-phenyl-5-(trifluoromethyl)imidazolidine-2,4-dione	56474445	C20H15F3N4O4	125.0244:[C4H5N3O2-H]-H-;191.0196:[C7H3F3NO2+H]-	2.524132732198336	125.0244_187.2;191.0196_169.7	11	2
25.184032390614263	0.219	InChI=1S/C17H17ClF3N5O3/c1-2-29-16(28)24-15(27)11(8-22)10-25-3-5-26(6-4-25)14-13(18)7-12(9-23-14)17(19,20)21/h7,9-10H,2-6H2,1H3,(H,24,27,28)/p+1/b11-10+	432.105	ethyl N-[(E)-3-[4-[3-chloro-5-(trifluoromethyl)pyridin-1-ium-2-yl]piperazin-1-yl]-2-cyano-prop-2-enoyl]carbamate	40452351	C17H17ClF3N5O3	59.0128:[C2H2O2+H]-;191.0196:[C7H4ClF2N2+2H]-;205.073:[C9H11N4O2-H]-H-	1.7443401060940544	59.0128_188.8;191.0196_169.7;205.073_113.5	11	3
14.564210186778622	0.2184	InChI=1S/C19H20ClF3N2O4/c1-3-8-27-11-25-17(26)12(2)28-14-4-6-15(7-5-14)29-18-16(20)9-13(10-24-18)19(21,22)23/h4-7,9-10,12H,3,8,11H2,1-2H3,(H,25,26)	432.106	2-[4-[[3-chloro-5-(trifluoromethyl)-2-pyridyl]oxy]phenoxy]-N-(propoxymethyl)propanamide	101634684	C19H20ClF3N2O4	100.9666:[C3HClNO]-H-;205.073:[C11H13NO3-H]-H-	2.496957614311492	100.9666_99.2;205.073_113.5	11	2
10.285033617145206	0.2183	InChI=1S/C20H15F3N4O4/c21-20(22,23)17-7-8-27(26-17)14-4-1-12(2-5-14)18(28)24-25-19(29)13-3-6-15-16(11-13)31-10-9-30-15/h1-8,11H,9-10H2,(H,24,28)(H,25,29)	432.105	N''-[4-[3-(trifluoromethyl)pyrazol-1-yl]benzoyl]-2,3-dihydro-1,4-benzodioxine-6-carbohydrazide	56050805	C20H15F3N4O4	59.0128:[C2H4O2]-H-;205.073:[C9H7N4O2+2H]-	2.8021696328075447	59.0128_188.8;205.073_113.5	11	2
17.04714064114119	0.2181	InChI=1S/C21H25BrN2O3/c1-2-26-18-9-14(10-23)8-17(22)21(18)27-11-19(25)24-20-15-4-12-3-13(6-15)7-16(20)5-12/h8-9,12-13,15-16,20H,2-7,11H2,1H3,(H,24,25)	432.105	N-(2-adamantyl)-2-(2-bromo-4-cyano-6-ethoxy-phenoxy)acetamide	78869586	C21H25BrN2O3	59.0128:[C2H3O2]-;125.0244:[C6H8O3-2H]-H-;205.073:[C11H10NO3+H]-	2.3136982437319573	59.0128_188.8;125.0244_187.2;205.073_113.5	11	3
15.230517703659618	0.2177	InChI=1S/C21H25BrN2O3/c1-4-10-23-13-16-11-18(22)21(19(12-16)26-5-2)27-14-20(25)24-17-8-6-15(3)7-9-17/h4,6-9,11-12,23H,1,5,10,13-14H2,2-3H3,(H,24,25)	432.105	2-[4-[(allylamino)methyl]-2-bromo-6-ethoxy-phenoxy]-N-(p-tolyl)acetamide	49943196	C21H25BrN2O3	59.0128:[C2H2O2+H]-;125.0244:[C6H7O3-H]-H-;205.073:[C11H10NO3+H]-	2.4371930813468716	59.0128_188.8;125.0244_187.2;205.073_113.5	11	3
15.230517703659618	0.2177	InChI=1S/C21H25BrN2O3/c1-4-10-23-13-16-11-19(26-5-2)20(12-18(16)22)27-14-21(25)24-17-8-6-15(3)7-9-17/h4,6-9,11-12,23H,1,5,10,13-14H2,2-3H3,(H,24,25)	432.105	2-[4-[(allylamino)methyl]-5-bromo-2-ethoxy-phenoxy]-N-(p-tolyl)acetamide	66534033	C21H25BrN2O3	59.0128:[C2H2O2+H]-;125.0244:[C6H7O3-H]-H-;205.073:[C11H10NO3+H]-	2.4371930813468716	59.0128_188.8;125.0244_187.2;205.073_113.5	11	3
14.892191327679257	0.2177	InChI=1S/C19H20ClF3N2O4/c1-4-27-14-7-11(8-15(28-5-2)16(14)29-6-3)18(26)25-17-13(20)9-12(10-24-17)19(21,22)23/h7-10H,4-6H2,1-3H3,(H,24,25,26)	432.106	N-[3-chloro-5-(trifluoromethyl)-2-pyridyl]-3,4,5-triethoxy-benzamide	3404492	C19H20ClF3N2O4	100.9666:[C3HClNO]-H-;205.073:[C11H13NO3-H]-H-	2.462196854140257	100.9666_99.2;205.073_113.5	11	2
9.827829403847074	0.2168	InChI=1S/C20H15F3N4O4/c1-11-12-5-3-4-6-14(12)31-15(11)10-30-19(28)13-9-24-27(18(13)20(21,22)23)16-7-8-17(29-2)26-25-16/h3-9H,10H2,1-2H3	432.105	(3-methylbenzofuran-2-yl)methyl 1-(6-methoxypyridazin-3-yl)-5-(trifluoromethyl)pyrazole-4-carboxylate	86953832	C20H15F3N4O4	59.0128:[C2H2O2+H]-;191.0196:[C5H3F3N4O]-H-	2.8097167527702984	59.0128_188.8;191.0196_169.7	11	2
15.827046593963566	0.2163	InChI=1S/C21H25BrN2O3/c1-3-24(14-16-8-9-19-20(12-16)27-11-10-26-19)21(25)13-23-15(2)17-6-4-5-7-18(17)22/h4-9,12,15,23H,3,10-11,13-14H2,1-2H3	432.105	2-[1-(2-bromophenyl)ethylamino]-N-(2,3-dihydro-1,4-benzodioxin-6-ylmethyl)-N-ethyl-acetamide	112801129	C21H25BrN2O3	59.0128:[C2H4O2]-H-;205.073:[C11H11NO3]-	2.371702825422892	59.0128_188.8;205.073_113.5	11	2
9.444010059707217	0.2118	InChI=1S/C21H25BrN2O3/c1-5-26-20-10-15-9-13(3)27-19(15)11-18(20)23-14(4)21(25)24-17-7-6-12(2)8-16(17)22/h6-8,10-11,13-14,23H,5,9H2,1-4H3,(H,24,25)	432.105	N-(2-bromo-4-methyl-phenyl)-2-[(5-ethoxy-2-methyl-2,3-dihydrobenzofuran-6-yl)amino]propanamide	42926535	C21H25BrN2O3	205.073:[C11H13NO3-H]-H-	2.7573176498150356	205.073_113.5	11	1
9.981559793795375	0.2116	InChI=1S/C23H14F2N4O3/c24-17-4-3-14(21(26)31)19(25)18(17)20(30)16-9-28-22-15(16)6-11(7-27-22)10-1-2-13-12(5-10)8-29-23(13)32/h1-7,9H,8H2,(H2,26,31)(H,27,28)(H,29,32)	432.103	2,4-difluoro-3-[5-(1-oxoisoindolin-5-yl)-1H-pyrrolo[2,3-b]pyridine-3-carbonyl]benzamide	70922024	C23H14F2N4O3	191.0196:[C10H4F2NO]-H-	2.7143015307789273	191.0196_169.7	11	1
9.981559793795375	0.2116	InChI=1S/C23H14F2N4O3/c24-17-4-3-13(21(26)31)19(25)18(17)20(30)16-9-28-22-15(16)6-12(8-27-22)10-1-2-11-7-29-23(32)14(11)5-10/h1-6,8-9H,7H2,(H2,26,31)(H,27,28)(H,29,32)	432.103	2,4-difluoro-3-[5-(3-oxoisoindolin-5-yl)-1H-pyrrolo[2,3-b]pyridine-3-carbonyl]benzamide	117953231	C23H14F2N4O3	191.0196:[C10H4F2NO]-H-	2.7143015307789273	191.0196_169.7	11	1
9.938843750044107	0.2115	InChI=1S/C20H15F3N4O4/c21-20(22,23)12-3-4-24-18(6-12)31-13-8-27(9-13)19(28)15-7-14(25-26-15)11-1-2-16-17(5-11)30-10-29-16/h1-7,13H,8-10H2,(H,25,26)	432.105	[3-(1,3-benzodioxol-5-yl)-1H-pyrazol-5-yl]-[3-[[4-(trifluoromethyl)-2-pyridyl]oxy]azetidin-1-yl]methanone	122251469	C20H15F3N4O4	59.0128:[C2H2O2+H]-;205.073:[C9H8N4O2+H]-	2.7165620484610686	59.0128_188.8;205.073_113.5	11	2
9.938843750044107	0.2115	InChI=1S/C20H15F3N4O4/c21-20(22,23)12-2-4-18(24-7-12)31-13-8-27(9-13)19(28)15-6-14(25-26-15)11-1-3-16-17(5-11)30-10-29-16/h1-7,13H,8-10H2,(H,25,26)	432.105	[3-(1,3-benzodioxol-5-yl)-1H-pyrazol-5-yl]-[3-[[5-(trifluoromethyl)-2-pyridyl]oxy]azetidin-1-yl]methanone	122247661	C20H15F3N4O4	59.0128:[C2H2O2+H]-;205.073:[C9H8N4O2+H]-	2.7165620484610686	59.0128_188.8;205.073_113.5	11	2
9.936385504089177	0.2115	InChI=1S/C20H15F3N4O4/c21-20(22,23)17-2-1-3-18(24-17)31-12-8-27(9-12)19(28)14-7-13(25-26-14)11-4-5-15-16(6-11)30-10-29-15/h1-7,12H,8-10H2,(H,25,26)	432.105	[3-(1,3-benzodioxol-5-yl)-1H-pyrazol-5-yl]-[3-[[6-(trifluoromethyl)-2-pyridyl]oxy]azetidin-1-yl]methanone	122251955	C20H15F3N4O4	59.0128:[C2H2O2+H]-;205.073:[C9H8N4O2+H]-	2.7165620484610686	59.0128_188.8;205.073_113.5	11	2
13.070745658503299	0.2112	InChI=1S/C21H25BrN2O3/c1-3-24(12-18-14-26-19-6-4-5-7-20(19)27-18)13-21(25)23-15(2)16-8-10-17(22)11-9-16/h4-11,15,18H,3,12-14H2,1-2H3,(H,23,25)	432.105	N-[1-(4-bromophenyl)ethyl]-2-[2,3-dihydro-1,4-benzodioxin-3-ylmethyl(ethyl)amino]acetamide	46562203	C21H25BrN2O3	59.0128:[C2H3O2]-;205.073:[C11H12NO3]-H-	2.4861133082987346	59.0128_188.8;205.073_113.5	11	2
14.167806018635408	0.2106	InChI=1S/C23H17FN4O2S/c24-17-6-3-15(4-7-17)12-28-20(14-31-23(28)26-18-2-1-9-25-11-18)16-5-8-21-19(10-16)27-22(29)13-30-21/h1-11,14H,12-13H2,(H,27,29)	432.106	6-[3-[(4-fluorophenyl)methyl]-2-(3-pyridylimino)thiazol-4-yl]-4H-1,4-benzoxazin-3-one	24126733	C23H17FN4O2S	59.0128:[C2H3O2]-;191.0196:[C10H7FNS]-H-	2.397769102714798	59.0128_188.8;191.0196_169.7	11	2
11.28398818404188	0.2104	InChI=1S/C21H25BrN2O3/c1-3-11-23-18-14-20(27-15-16-8-5-4-6-9-16)19(26-2)13-17(18)21(25)24-12-7-10-22/h3-6,8-9,13-14,23H,1,7,10-12,15H2,2H3,(H,24,25)	432.105	2-(allylamino)-4-benzyloxy-N-(3-bromopropyl)-5-methoxy-benzamide	10938962	C21H25BrN2O3	205.073:[C11H12NO3]-H-	2.6016665355713093	205.073_113.5	11	1
19.465014570648595	0.2101	InChI=1S/C21H25BrN2O3/c1-6-9-27-18-10-13(4)24(26)14(5)19(18)21(25)23-20-15(7-2)11-17(22)12-16(20)8-3/h6,10-12H,1,7-9H2,2-5H3,(H,23,25)	432.105	4-allyloxy-N-(4-bromo-2,6-diethyl-phenyl)-2,6-dimethyl-1-oxido-pyridin-1-ium-3-carboxamide	20149743	C21H25BrN2O3	205.073:[C11H12NO3]-H-	2.010011841357001	205.073_113.5	11	1
5.900082639747228	0.2101	InChI=1S/C25H20O5S/c26-23-20-10-4-5-11-21(20)24(27)25(28)22(23)12-6-7-17-13-15-19(16-14-17)31(29,30)18-8-2-1-3-9-18/h1-5,8-11,13-16,26H,6-7,12H2	432.103	3-[3-[4-(benzenesulfonyl)phenyl]propyl]-4-hydroxy-naphthalene-1,2-dione	270724	C25H20O5S	125.0244:[C6H5O3]-	2.983436290977938	125.0244_187.2	11	1
19.62140094122705	0.21	InChI=1S/C21H25BrN2O3/c1-14-6-5-7-16-8-9-24(20(14)16)12-15-10-17(22)21(18(11-15)26-4)27-13-19(25)23(2)3/h5-7,10-11H,8-9,12-13H2,1-4H3	432.105	2-[2-bromo-6-methoxy-4-[(7-methylindolin-1-yl)methyl]phenoxy]-N,N-dimethyl-acetamide	75451839	C21H25BrN2O3	59.0128:[C2H2O2+H]-;125.0244:[C6H6O3]-H-;205.073:[C11H13NO3-H]-H-	1.9973171452880978	59.0128_188.8;125.0244_187.2;205.073_113.5	11	3
21.809820937943496	0.2094	InChI=1S/C20H15F3N4O4/c21-20(22,23)31-16-6-7-18-13(11-16)3-2-9-25(18)19(28)17-8-10-26(24-17)14-4-1-5-15(12-14)27(29)30/h1,4-8,10-12H,2-3,9H2	432.105	[1-(3-nitrophenyl)pyrazol-3-yl]-[6-(trifluoromethoxy)-3,4-dihydro-2H-quinolin-1-yl]methanone	55671723	C20H15F3N4O4	125.0244:[C4H2N3O2+H]-;191.0196:[C7H3N4O3]-;205.073:[C9H8F3NO+2H]-	1.8299182047765248	125.0244_187.2;191.0196_169.7;205.073_113.5	11	3
4.412618762525365	0.2091	InChI=1S/C20H15F3N4O4/c1-31-16-10-24-15(12-8-26-19(27-9-12)20(21,22)23)6-11(16)7-25-17(28)13-4-2-3-5-14(13)18(29)30/h2-6,8-10H,7H2,1H3,(H,25,28)(H,29,30)	432.105	2-[[5-methoxy-2-[2-(trifluoromethyl)pyrimidin-5-yl]-4-pyridyl]methylcarbamoyl]benzoic acid	118008441	C20H15F3N4O4	125.0244:[C6H4O3+H]-	3.074609056242791	125.0244_187.2	11	1
13.370833367905867	0.209	InChI=1S/C21H25BrN2O3/c1-3-18(16-5-7-17(22)8-6-16)23-21(25)14-24(2)13-15-4-9-19-20(12-15)27-11-10-26-19/h4-9,12,18H,3,10-11,13-14H2,1-2H3,(H,23,25)	432.105	N-[1-(4-bromophenyl)propyl]-2-[2,3-dihydro-1,4-benzodioxin-6-ylmethyl(methyl)amino]acetamide	45837150	C21H25BrN2O3	59.0128:[C2H4O2]-H-;205.073:[C11H12NO3]-H-	2.4291227792345897	59.0128_188.8;205.073_113.5	11	2
10.955635430716859	0.2086	InChI=1S/C21H25BrN2O3/c1-15(17-9-2-3-10-18(17)22)23-21(25)24-19-11-4-5-12-20(19)27-14-16-8-6-7-13-26-16/h2-5,9-12,15-16H,6-8,13-14H2,1H3,(H2,23,24,25)/t15-,16-/m1/s1	432.105	1-[(1R)-1-(2-bromophenyl)ethyl]-3-[2-[[(2R)-tetrahydropyran-2-yl]methoxy]phenyl]urea	95674010	C21H25BrN2O3	59.0128:[C2H3O2]-;205.073:[C11H13NO3-H]-H-	2.5971030716654138	59.0128_188.8;205.073_113.5	11	2
10.454893404412154	0.2083	InChI=1S/C21H25BrN2O3/c1-14(2)24(3)13-16-6-4-15(5-7-16)12-23-21(25)17-10-18(22)20-19(11-17)26-8-9-27-20/h4-7,10-11,14H,8-9,12-13H2,1-3H3,(H,23,25)	432.105	5-bromo-N-[[4-[[isopropyl(methyl)amino]methyl]phenyl]methyl]-2,3-dihydro-1,4-benzodioxine-7-carboxamide	99323916	C21H25BrN2O3	59.0128:[C2H4O2]-H-;205.073:[C11H9NO3+2H]-	2.6268325560246812	59.0128_188.8;205.073_113.5	11	2
16.58942946199099	0.2081	InChI=1S/C21H25BrN2O3/c22-15-4-3-7-18(12-15)26-14-19-8-9-20(27-19)21(25)23-16-10-11-24(13-16)17-5-1-2-6-17/h3-4,7-9,12,16-17H,1-2,5-6,10-11,13-14H2,(H,23,25)/t16-/m0/s1	432.105	5-[(3-bromophenoxy)methyl]-N-[(3S)-1-cyclopentylpyrrolidin-3-yl]furan-2-carboxamide	96477638	C21H25BrN2O3	59.0128:[C2H2O2+H]-;125.0244:[C6H4O3+H]-;205.073:[C11H9NO3+2H]-	2.1839630184935173	59.0128_188.8;125.0244_187.2;205.073_113.5	11	3
17.036163393449556	0.2075	InChI=1S/C19H20ClF3N2O4/c1-4-29-15-6-5-11(19(21,22)23)7-13(15)24-10-18(26)25-14-9-16(27-2)12(20)8-17(14)28-3/h5-9,24H,4,10H2,1-3H3,(H,25,26)	432.106	N-(4-chloro-2,5-dimethoxy-phenyl)-2-[2-ethoxy-5-(trifluoromethyl)anilino]acetamide	52758525	C19H20ClF3N2O4	205.073:[C9H9F3NO+H]-	2.141748970512342	205.073_113.5	11	1
9.69767713968489	0.2074	InChI=1S/C21H25BrN2O3/c1-14(2)23-21(26)15-7-9-24(10-8-15)20(25)13-27-19-6-4-16-11-18(22)5-3-17(16)12-19/h3-6,11-12,14-15H,7-10,13H2,1-2H3,(H,23,26)	432.105	1-[2-[(6-bromo-2-naphthyl)oxy]acetyl]-N-isopropyl-piperidine-4-carboxamide	56273550	C21H25BrN2O3	59.0128:[C2H2O2+H]-;205.073:[C11H14NO3-2H]-H-	2.6675662053192077	59.0128_188.8;205.073_113.5	11	2
10.943164142479594	0.2073	InChI=1S/C20H15F3N4O4/c21-20(22,23)16-9-17(28)25-14-3-1-2-4-15(14)27(16)18(29)10-30-13-7-5-12(6-8-13)19-26-24-11-31-19/h1-8,11,16H,9-10H2,(H,25,28)	432.105	5-[2-[4-(1,3,4-oxadiazol-2-yl)phenoxy]acetyl]-4-(trifluoromethyl)-3,4-dihydro-1H-1,5-benzodiazepin-2-one	46690973	C20H15F3N4O4	59.0128:[C2H2O2+H]-;191.0196:[C7H5F3NO2]-H-	2.5768802460922116	59.0128_188.8;191.0196_169.7	11	2
16.171453955091152	0.2069	InChI=1S/C19H20ClF3N2O4/c1-3-27-17(26)9-16(24)11(2)28-13-4-6-14(7-5-13)29-18-15(20)8-12(10-25-18)19(21,22)23/h4-8,10-11,16H,3,9,24H2,1-2H3	432.106	ethyl 3-amino-4-[4-[[3-chloro-5-(trifluoromethyl)-2-pyridyl]oxy]phenoxy]pentanoate	20402810	C19H20ClF3N2O4	59.0128:[C2H2O2+H]-;100.9666:[C3HClNO]-H-;205.073:[C11H13NO3-H]-H-	2.1954282289960854	59.0128_188.8;100.9666_99.2;205.073_113.5	11	3
20.362685167847157	0.2067	InChI=1S/C20H15F3N4O4/c21-20(22,23)14-6-3-4-12(10-14)11-30-19(29)27(18(24)25)31-17(28)16-9-8-13-5-1-2-7-15(13)26-16/h1-10H,11H2,(H3,24,25)	432.105	[carbamimidoyl-[[3-(trifluoromethyl)phenyl]methoxycarbonyl]amino] quinoline-2-carboxylate	23221398	C20H15F3N4O4	59.0128:[C2H2O2+H]-;101.0236:[C2H3N3O2]-;125.0244:[C4H4N3O2]-H-;205.073:[C9H7N4O2+2H]-	1.8906972163907914	59.0128_188.8;101.0236_177.5;125.0244_187.2;205.073_113.5	11	4
9.148298650816447	0.2055	InChI=1S/C20H15F3N4O4/c21-20(22,23)17-6-3-14(8-24-17)31-13-2-5-15-11(7-13)1-4-16(26-15)18(28)27-9-12(10-27)25-19(29)30/h1-8,12,25H,9-10H2,(H,29,30)	432.105	[1-[6-[[6-(trifluoromethyl)-3-pyridyl]oxy]quinoline-2-carbonyl]azetidin-3-yl]carbamic acid	118273426	C20H15F3N4O4	191.0196:[C10H6F2NO-2H]-H-	2.6764619780182035	191.0196_169.7	11	1
20.198809249815397	0.2055	InChI=1S/C20H15F3N4O4/c21-20(22,23)30-14-7-5-13(6-8-14)18-25-19(31-26-18)16-4-1-9-27(16)12-17(28)24-11-15-3-2-10-29-15/h1-10H,11-12H2,(H,24,28)	432.105	N-(2-furylmethyl)-2-[2-[3-[4-(trifluoromethoxy)phenyl]-1,2,4-oxadiazol-5-yl]pyrrol-1-yl]acetamide	49809038	C20H15F3N4O4	191.0196:[C7H3F3NO2+H]-;205.073:[C9H8N4O2+H]-	1.883401615214836	191.0196_169.7;205.073_113.5	11	2
9.148298650816447	0.2055	InChI=1S/C20H15F3N4O4/c21-20(22,23)12-2-6-17(24-8-12)31-14-3-5-15-11(7-14)1-4-16(26-15)18(28)27-9-13(10-27)25-19(29)30/h1-8,13,25H,9-10H2,(H,29,30)	432.105	[1-[6-[[5-(trifluoromethyl)-2-pyridyl]oxy]quinoline-2-carbonyl]azetidin-3-yl]carbamic acid	118273927	C20H15F3N4O4	191.0196:[C10H6F2NO-2H]-H-	2.6764619780182035	191.0196_169.7	11	1
17.042869457576877	0.2048	InChI=1S/C22H19ClF2N2O3/c23-15-5-3-14(4-6-15)19-20(26-9-1-2-13(11-26)12-28)22(30)27(21(19)29)18-8-7-16(24)10-17(18)25/h3-8,10,13,28H,1-2,9,11-12H2	432.105	3-(4-chlorophenyl)-1-(2,4-difluorophenyl)-4-[3-(hydroxymethyl)-1-piperidyl]pyrrole-2,5-dione	110571423	C22H19ClF2N2O3	191.0196:[C10H4F2NO]-H-;205.073:[C11H12NO3]-H-	2.0988526202464044	191.0196_169.7;205.073_113.5	11	2
17.042869457576877	0.2048	InChI=1S/C22H19ClF2N2O3/c23-15-5-3-14(4-6-15)19-20(26-9-1-2-13(11-26)12-28)22(30)27(21(19)29)16-7-8-17(24)18(25)10-16/h3-8,10,13,28H,1-2,9,11-12H2	432.105	3-(4-chlorophenyl)-1-(3,4-difluorophenyl)-4-[3-(hydroxymethyl)-1-piperidyl]pyrrole-2,5-dione	110571384	C22H19ClF2N2O3	191.0196:[C10H4F2NO]-H-;205.073:[C11H12NO3]-H-	2.0988526202464044	191.0196_169.7;205.073_113.5	11	2
14.679151919750971	0.2042	InChI=1S/C20H15F3N4O4/c1-19(13-4-2-12(10-24)3-5-13)17(29)27(18(30)26-19)11-16(28)25-14-6-8-15(9-7-14)31-20(21,22)23/h2-9H,11H2,1H3,(H,25,28)(H,26,30)/t19-/m1/s1	432.105	2-[(4R)-4-(4-cyanophenyl)-4-methyl-2,5-dioxo-imidazolidin-1-yl]-N-[4-(trifluoromethoxy)phenyl]acetamide	29156381	C20H15F3N4O4	125.0244:[C4H4N3O2]-H-;191.0196:[C7H5F3NO2]-H-	2.2582468063633008	125.0244_187.2;191.0196_169.7	11	2
15.845047366865783	0.2041	InChI=1S/C21H25BrN2O3/c1-4-23(5-2)13-14-24-17-11-8-10-16(22)19(17)21(26,20(24)25)15-9-6-7-12-18(15)27-3/h6-12,26H,4-5,13-14H2,1-3H3	432.105	4-bromo-1-[2-(diethylamino)ethyl]-3-hydroxy-3-(2-methoxyphenyl)indolin-2-one	18518588	C21H25BrN2O3	125.0244:[C6H5O3]-;205.073:[C11H12NO3]-H-	2.173227737895041	125.0244_187.2;205.073_113.5	11	2
20.541316429512676	0.204	InChI=1S/C18H20N6O3S2/c1-26-13-8-7-11(9-14(13)27-2)24-18(21-22-23-24)28-10-16(25)20-17-19-12-5-3-4-6-15(12)29-17/h7-9H,3-6,10H2,1-2H3,(H,19,20,25)	432.104	2-[1-(3,4-dimethoxyphenyl)tetrazol-5-yl]sulfanyl-N-(4,5,6,7-tetrahydro-1,3-benzothiazol-2-yl)acetamide	3189463	C18H20N6O3S2	205.073:[C9H9N4O2]-	1.8340419064775992	205.073_113.5	11	1
20.541316429512676	0.204	InChI=1S/C18H20N6O3S2/c1-26-12-7-11(8-13(9-12)27-2)24-18(21-22-23-24)28-10-16(25)20-17-19-14-5-3-4-6-15(14)29-17/h7-9H,3-6,10H2,1-2H3,(H,19,20,25)	432.104	2-[1-(3,5-dimethoxyphenyl)tetrazol-5-yl]sulfanyl-N-(4,5,6,7-tetrahydro-1,3-benzothiazol-2-yl)acetamide	3189450	C18H20N6O3S2	205.073:[C9H9N4O2]-	1.8344494667767437	205.073_113.5	11	1
7.020574656540655	0.2027	InChI=1S/C20H15F3N4O4/c1-11-16(26-27(25-11)13-4-2-12(3-5-13)20(21,22)23)10-30-14-6-7-17-15(8-14)24-18(31-17)9-19(28)29/h2-8H,9-10H2,1H3,(H,28,29)	432.105	2-[5-[[5-methyl-2-[4-(trifluoromethyl)phenyl]triazol-4-yl]methoxy]-1,3-benzoxazol-2-yl]acetic acid	11539276	C20H15F3N4O4	59.0128:[C2H3O2]-;125.0244:[C6H5O3]-	2.782389208619437	59.0128_188.8;125.0244_187.2	11	2
12.785215208041162	0.2027	InChI=1S/C21H25BrN2O3/c1-21(2,16-6-9-18-19(12-16)27-11-10-26-18)14-23-20(25)24(3)13-15-4-7-17(22)8-5-15/h4-9,12H,10-11,13-14H2,1-3H3,(H,23,25)	432.105	1-[(4-bromophenyl)methyl]-3-[2-(2,3-dihydro-1,4-benzodioxin-6-yl)-2-methyl-propyl]-1-methyl-urea	52794847	C21H25BrN2O3	59.0128:[C2H4O2]-H-;205.073:[C11H12NO3]-H-	2.3687120115295692	59.0128_188.8;205.073_113.5	11	2
17.826108158551886	0.2026	InChI=1S/C20H15F3N4O4/c21-20(22,23)19(28)31-17(14-4-2-1-3-5-14)11-24-18-10-16(25-12-26-18)13-6-8-15(9-7-13)27(29)30/h1-10,12,17H,11H2,(H,24,25,26)	432.105	[2-[[6-(4-nitrophenyl)pyrimidin-4-yl]amino]-1-phenyl-ethyl] 2,2,2-trifluoroacetate	68992680	C20H15F3N4O4	191.0196:[C7H5F3NO2]-H-;205.073:[C9H7N4O2+2H]-	2.0054165365564627	191.0196_169.7;205.073_113.5	11	2
20.541316429512676	0.2023	InChI=1S/C18H20N6O3S2/c1-26-11-7-8-13(14(9-11)27-2)24-18(21-22-23-24)28-10-16(25)20-17-19-12-5-3-4-6-15(12)29-17/h7-9H,3-6,10H2,1-2H3,(H,19,20,25)	432.104	2-[1-(2,4-dimethoxyphenyl)tetrazol-5-yl]sulfanyl-N-(4,5,6,7-tetrahydro-1,3-benzothiazol-2-yl)acetamide	3189430	C18H20N6O3S2	205.073:[C9H9N4O2]-	1.8062421841849174	205.073_113.5	11	1
9.057330243741536	0.2021	InChI=1S/C21H25BrN2O3/c1-27-21(26)19-15-10-17-20-14(13-4-2-3-5-16(13)24(20)22)8-9-23(17)11-12(15)6-7-18(19)25/h2-5,12,15,17-19,25H,6-11H2,1H3	432.105	methyl 3-bromo-18-hydroxy-11,12,14,15,16,17,18,19,20,21-decahydro-1H-yohimban-19-carboxylate	44135409	C21H25BrN2O3	59.0128:[C2H3O2]-;89.0232:[C3H3O3+2H]-;101.0236:[C4H6O3]-H-	2.6278932422866035	59.0128_188.8;89.0232_90.6;101.0236_177.5	11	3
17.036163393449556	0.202	InChI=1S/C19H20ClF3N2O4/c1-4-29-11-5-6-14(12(7-11)19(21,22)23)24-10-18(26)25-15-9-16(27-2)13(20)8-17(15)28-3/h5-9,24H,4,10H2,1-3H3,(H,25,26)	432.106	N-(4-chloro-2,5-dimethoxy-phenyl)-2-[4-ethoxy-2-(trifluoromethyl)anilino]acetamide	52763021	C19H20ClF3N2O4	205.073:[C9H9F3NO+H]-	2.053092422268534	205.073_113.5	11	1
8.856716596065219	0.2017	InChI=1S/C22H19ClF2N2O3/c1-29-13-7-6-12(19(8-13)30-2)10-27-11-18-20(22(27)28)14(23)9-17(26-18)21-15(24)4-3-5-16(21)25/h3-9,22,28H,10-11H2,1-2H3	432.105	4-chloro-2-(2,6-difluorophenyl)-6-[(2,4-dimethoxyphenyl)methyl]-5,7-dihydropyrrolo[3,4-b]pyridin-5-ol	123764874	C22H19ClF2N2O3	205.073:[C11H13NO3-H]-H-	2.6358157303963834	205.073_113.5	11	1
12.634404676646183	0.2015	InChI=1S/C21H25BrN2O3/c1-3-26-19-10-9-16(15-20(19)27-4-2)11-13-23-21(25)24-14-12-17-7-5-6-8-18(17)22/h5-10,12,14-15H,3-4,11,13H2,1-2H3,(H2,23,24,25)/b14-12+	432.105	1-[(E)-2-(2-bromophenyl)vinyl]-3-[2-(3,4-diethoxyphenyl)ethyl]urea	108905164	C21H25BrN2O3	205.073:[C11H13NO3-H]-H-	2.3611141438603296	205.073_113.5	11	1
14.078246856026217	0.2012	InChI=1S/C20H15F3N4O4/c21-20(22,23)12-4-3-5-13(10-12)24-18(30)14-6-1-2-7-15(14)25-17(29)11-27-9-8-16(28)26-19(27)31/h1-10H,11H2,(H,24,30)(H,25,29)(H,26,28,31)	432.105	2-[[2-(2,4-dioxopyrimidin-1-yl)acetyl]amino]-N-[3-(trifluoromethyl)phenyl]benzamide	60602412	C20H15F3N4O4	125.0244:[C4H4N3O2]-H-;191.0196:[C10H6F2NO-2H]-H-	2.2529091261455956	125.0244_187.2;191.0196_169.7	11	2
15.150137004832628	0.2011	InChI=1S/C21H25BrN2O3/c1-13(2)17-7-5-14(3)9-19(17)27-12-21(26)23-11-20(25)24-18-8-6-16(22)10-15(18)4/h5-10,13H,11-12H2,1-4H3,(H,23,26)(H,24,25)	432.105	N-(4-bromo-2-methyl-phenyl)-2-[[2-(2-isopropyl-5-methyl-phenoxy)acetyl]amino]acetamide	26071067	C21H25BrN2O3	59.0128:[C2H3O2]-;205.073:[C11H11NO3]-	2.173074346060262	59.0128_188.8;205.073_113.5	11	2
17.042869457576877	0.2011	InChI=1S/C22H19ClF2N2O3/c1-12-10-26(11-13(2)30-12)20-19(14-3-5-15(23)6-4-14)21(28)27(22(20)29)18-8-7-16(24)9-17(18)25/h3-9,12-13H,10-11H2,1-2H3	432.105	3-(4-chlorophenyl)-1-(2,4-difluorophenyl)-4-(2,6-dimethylmorpholin-4-yl)pyrrole-2,5-dione	110571410	C22H19ClF2N2O3	191.0196:[C10H4F2NO]-H-;205.073:[C11H12NO3]-H-	2.038402934430912	191.0196_169.7;205.073_113.5	11	2
17.042869457576877	0.2011	InChI=1S/C22H19ClF2N2O3/c1-12-10-26(11-13(2)30-12)20-19(14-3-5-15(23)6-4-14)21(28)27(22(20)29)16-7-8-17(24)18(25)9-16/h3-9,12-13H,10-11H2,1-2H3	432.105	3-(4-chlorophenyl)-1-(3,4-difluorophenyl)-4-(2,6-dimethylmorpholin-4-yl)pyrrole-2,5-dione	110571371	C22H19ClF2N2O3	191.0196:[C10H4F2NO]-H-;205.073:[C11H12NO3]-H-	2.038402934430912	191.0196_169.7;205.073_113.5	11	2
15.150137004832628	0.2011	InChI=1S/C21H25BrN2O3/c1-13(2)18-7-6-17(10-14(18)3)27-12-21(26)23-11-20(25)24-19-8-5-16(22)9-15(19)4/h5-10,13H,11-12H2,1-4H3,(H,23,26)(H,24,25)	432.105	N-(4-bromo-2-methyl-phenyl)-2-[[2-(4-isopropyl-3-methyl-phenoxy)acetyl]amino]acetamide	26712949	C21H25BrN2O3	59.0128:[C2H3O2]-;205.073:[C11H11NO3]-	2.173074346060262	59.0128_188.8;205.073_113.5	11	2
11.224524736613901	0.201	InChI=1S/C21H25BrN2O3/c1-16(27-19-9-7-18(22)8-10-19)21(25)23-13-20-15-24(11-12-26-20)14-17-5-3-2-4-6-17/h2-10,16,20H,11-15H2,1H3,(H,23,25)	432.105	N-[(4-benzylmorpholin-2-yl)methyl]-2-(4-bromophenoxy)propanamide	60381770	C21H25BrN2O3	205.073:[C11H12NO3]-H-	2.454319245247979	205.073_113.5	11	1
17.919150227082294	0.2009	InChI=1S/C20H15F3N4O4/c1-30-19(29)14-8-13(10-24)18(28)27(11-14)7-3-6-16-25-17(26-31-16)12-4-2-5-15(9-12)20(21,22)23/h2,4-5,8-9,11H,3,6-7H2,1H3	432.105	methyl 5-cyano-6-oxo-1-[3-[3-[3-(trifluoromethyl)phenyl]-1,2,4-oxadiazol-5-yl]propyl]pyridine-3-carboxylate	39033294	C20H15F3N4O4	59.0128:[C2H3O2]-;125.0244:[C6H4O3+H]-;205.073:[C9H7N4O2+2H]-	1.9721531284143319	59.0128_188.8;125.0244_187.2;205.073_113.5	11	3
10.91791752935307	0.2002	InChI=1S/C21H25BrN2O3/c1-14-5-10-20(19(22)12-14)24-21(25)15(2)23-16-6-8-17(9-7-16)27-13-18-4-3-11-26-18/h5-10,12,15,18,23H,3-4,11,13H2,1-2H3,(H,24,25)/t15-,18+/m0/s1	432.105	(2S)-N-(2-bromo-4-methyl-phenyl)-2-[4-[[(2R)-tetrahydrofuran-2-yl]methoxy]anilino]propanamide	52708591	C21H25BrN2O3	59.0128:[C2H3O2]-;205.073:[C11H13NO3-H]-H-	2.4626396389187004	59.0128_188.8;205.073_113.5	11	2
21.85072713403771	0.2001	InChI=1S/C17H16N6O8/c1-30-14-4-3-10(5-15(14)31-2)9-18-20-17(25)21-19-16(24)11-6-12(22(26)27)8-13(7-11)23(28)29/h3-9H,1-2H3,(H,19,24)(H2,20,21,25)/b18-9+	432.103	1-[(E)-(3,4-dimethoxyphenyl)methyleneamino]-3-[(3,5-dinitrobenzoyl)amino]urea	9552147	C17H16N6O8	101.0236:[C2H3N3O2]-;125.0244:[C4H4N3O2]-H-;205.073:[C9H9N4O2]-	1.6773009362279558	101.0236_177.5;125.0244_187.2;205.073_113.5	11	3
13.05941065704062	0.2	InChI=1S/C21H25BrN2O3/c1-4-27-18-11-5-15(6-12-18)20(26)23-13-19(25)24-14-21(2,3)16-7-9-17(22)10-8-16/h5-12H,4,13-14H2,1-3H3,(H,23,26)(H,24,25)	432.105	N-[2-[[2-(4-bromophenyl)-2-methyl-propyl]amino]-2-oxo-ethyl]-4-ethoxy-benzamide	52614125	C21H25BrN2O3	205.073:[C11H13NO3-H]-H-	2.3065206020056124	205.073_113.5	11	1
6.374336294674963	0.1998	InChI=1S/C20H15F3N4O4/c1-11-16(26-27(25-11)13-4-2-12(3-5-13)20(21,22)23)10-30-14-6-7-15-17(8-14)31-18(24-15)9-19(28)29/h2-8H,9-10H2,1H3,(H,28,29)	432.105	2-[6-[[5-methyl-2-[4-(trifluoromethyl)phenyl]triazol-4-yl]methoxy]-1,3-benzoxazol-2-yl]acetic acid	11690558	C20H15F3N4O4	59.0128:[C2H3O2]-;125.0244:[C6H4O3+H]-	2.782389208619437	59.0128_188.8;125.0244_187.2	11	2
12.50644937555223	0.1991	InChI=1S/C20H15F3N4O4/c1-19(13-5-7-15(8-6-13)31-20(21,22)23)17(29)27(18(30)26-19)11-16(28)25-14-4-2-3-12(9-14)10-24/h2-9H,11H2,1H3,(H,25,28)(H,26,30)	432.105	N-(3-cyanophenyl)-2-[4-methyl-2,5-dioxo-4-[4-(trifluoromethoxy)phenyl]imidazolidin-1-yl]acetamide	56385698	C20H15F3N4O4	125.0244:[C4H4N3O2]-H-;205.073:[C9H7N4O2+2H]-	2.3305470222670848	125.0244_187.2;205.073_113.5	11	2
11.532096610948697	0.1989	InChI=1S/C21H25BrN2O3/c1-16(27-20-10-6-5-9-19(20)22)13-18-15-23(11-12-24(18)21(25)26)14-17-7-3-2-4-8-17/h2-10,16,18H,11-15H2,1H3,(H,25,26)/t16?,18-/m0/s1	432.105	(2S)-4-benzyl-2-[2-(2-bromophenoxy)propyl]piperazine-1-carboxylic acid	89821330	C21H25BrN2O3	205.073:[C11H12NO3]-H-	2.3982565897700088	205.073_113.5	11	1
9.620858537544315	0.1988	InChI=1S/C21H25BrN2O3/c1-13(2)23-21(25)24-10-9-15-11-18(26-3)19(27-4)12-17(15)20(24)14-5-7-16(22)8-6-14/h5-8,11-13,20H,9-10H2,1-4H3,(H,23,25)	432.105	1-(4-bromophenyl)-N-isopropyl-6,7-dimethoxy-3,4-dihydro-1H-isoquinoline-2-carboxamide	42599486	C21H25BrN2O3	205.073:[C11H13NO3-H]-H-	2.5330869929688946	205.073_113.5	11	1
8.517815375253864	0.1986	InChI=1S/C20H15F3N4O4/c1-19(12-5-7-14(8-6-12)31-20(21,22)23)17(29)27(18(30)25-19)11-13-10-16(28)26-9-3-2-4-15(26)24-13/h2-10H,11H2,1H3,(H,25,30)	432.105	5-methyl-3-[(4-oxopyrido[1,2-a]pyrimidin-2-yl)methyl]-5-[4-(trifluoromethoxy)phenyl]imidazolidine-2,4-dione	56385566	C20H15F3N4O4	205.073:[C9H7N4O2+2H]-	2.6086863990560296	205.073_113.5	11	1
12.21119279453108	0.1981	InChI=1S/C20H15F3N4O4/c1-11-6-14(31-16(11)19(29)30-2)9-26-10-24-17-15(18(26)28)8-25-27(17)13-5-3-4-12(7-13)20(21,22)23/h3-8,10H,9H2,1-2H3	432.105	methyl 3-methyl-5-[[4-oxo-1-[3-(trifluoromethyl)phenyl]pyrazolo[3,4-d]pyrimidin-5-yl]methyl]furan-2-carboxylate	112828499	C20H15F3N4O4	59.0128:[C2H3O2]-;101.0236:[C4H3O3+2H]-;125.0244:[C6H4O3+H]-	2.3368415040891275	59.0128_188.8;101.0236_177.5;125.0244_187.2	11	3
15.230517703659618	0.1981	InChI=1S/C21H25BrN2O3/c1-3-26-19-10-15(12-23-16-8-9-16)18(22)11-20(19)27-13-21(25)24-17-6-4-14(2)5-7-17/h4-7,10-11,16,23H,3,8-9,12-13H2,1-2H3,(H,24,25)	432.105	2-[5-bromo-4-[(cyclopropylamino)methyl]-2-ethoxy-phenoxy]-N-(p-tolyl)acetamide	66534084	C21H25BrN2O3	59.0128:[C2H2O2+H]-;125.0244:[C6H7O3-H]-H-;205.073:[C11H10NO3+H]-	2.1191370625533312	59.0128_188.8;125.0244_187.2;205.073_113.5	11	3
15.230517703659618	0.1981	InChI=1S/C21H25BrN2O3/c1-3-26-19-11-15(12-23-16-8-9-16)10-18(22)21(19)27-13-20(25)24-17-6-4-14(2)5-7-17/h4-7,10-11,16,23H,3,8-9,12-13H2,1-2H3,(H,24,25)	432.105	2-[2-bromo-4-[(cyclopropylamino)methyl]-6-ethoxy-phenoxy]-N-(p-tolyl)acetamide	49942924	C21H25BrN2O3	59.0128:[C2H2O2+H]-;125.0244:[C6H7O3-H]-H-;205.073:[C11H10NO3+H]-	2.1191370625533312	59.0128_188.8;125.0244_187.2;205.073_113.5	11	3
14.18200455591583	0.1977	InChI=1S/C21H25BrN2O3/c22-16-6-4-5-15(13-16)18-17(19(25)14-7-8-14)20(26)21(27)24(18)12-11-23-9-2-1-3-10-23/h4-6,13-14,18,26H,1-3,7-12H2	432.105	2-(3-bromophenyl)-3-(cyclopropanecarbonyl)-4-hydroxy-1-[2-(1-piperidyl)ethyl]-2H-pyrrol-5-one	75792893	C21H25BrN2O3	125.0244:[C6H4O3+H]-;205.073:[C11H11NO3]-	2.1878911165198582	125.0244_187.2;205.073_113.5	11	2
18.324601090441533	0.1976	InChI=1S/C21H25BrN2O3/c22-18-4-1-2-5-19(18)26-15-17-8-9-20(27-17)21(25)24-11-3-10-23(12-13-24)14-16-6-7-16/h1-2,4-5,8-9,16H,3,6-7,10-15H2	432.105	[5-[(2-bromophenoxy)methyl]-2-furyl]-[4-(cyclopropylmethyl)-1,4-diazepan-1-yl]methanone	95750094	C21H25BrN2O3	59.0128:[C2H2O2+H]-;125.0244:[C6H4O3+H]-;205.073:[C11H14NO3-2H]-H-	1.890117813192262	59.0128_188.8;125.0244_187.2;205.073_113.5	11	3
5.908165339160494	0.1974	InChI=1S/C19H20ClF3N2O4/c20-13-2-12(19(21,22)23)7-24-15(13)25-14(26)8-29-16(27)17-3-10-1-11(4-17)6-18(28,5-10)9-17/h2,7,10-11,28H,1,3-6,8-9H2,(H,24,25,26)	432.106	[2-[[3-chloro-5-(trifluoromethyl)-2-pyridyl]amino]-2-oxo-ethyl] 3-hydroxyadamantane-1-carboxylate	5035322	C19H20ClF3N2O4	59.0128:[C2H2O2+H]-;89.0232:[C3H3O3+2H]-;100.9666:[C3HClNO]-H-	2.7770846370312507	59.0128_188.8;89.0232_90.6;100.9666_99.2	11	3
20.541316429512676	0.1971	InChI=1S/C18H20N6O3S2/c1-26-11-7-8-14(27-2)13(9-11)24-18(21-22-23-24)28-10-16(25)20-17-19-12-5-3-4-6-15(12)29-17/h7-9H,3-6,10H2,1-2H3,(H,19,20,25)	432.104	2-[1-(2,5-dimethoxyphenyl)tetrazol-5-yl]sulfanyl-N-(4,5,6,7-tetrahydro-1,3-benzothiazol-2-yl)acetamide	3189419	C18H20N6O3S2	205.073:[C9H9N4O2]-	1.7228096268525477	205.073_113.5	11	1
13.494272761167883	0.1969	InChI=1S/C21H25BrN2O3/c1-3-15(2)24-21(26)17-6-4-16(5-7-17)14-23-20(25)12-13-27-19-10-8-18(22)9-11-19/h4-11,15H,3,12-14H2,1-2H3,(H,23,25)(H,24,26)/t15-/m0/s1	432.105	4-[[3-(4-bromophenoxy)propanoylamino]methyl]-N-[(1S)-1-methylpropyl]benzamide	99485593	C21H25BrN2O3	205.073:[C11H11NO3]-	2.224823341357872	205.073_113.5	11	1
13.455737229815357	0.1966	InChI=1S/C21H25BrN2O3/c1-27-19-12-17(11-18(22)20(19)25)21(26)23-13-15-5-7-16(8-6-15)14-24-9-3-2-4-10-24/h5-8,11-12,25H,2-4,9-10,13-14H2,1H3,(H,23,26)	432.105	3-bromo-4-hydroxy-5-methoxy-N-[[4-(1-piperidylmethyl)phenyl]methyl]benzamide	18119420	C21H25BrN2O3	125.0244:[C6H6O3]-H-;205.073:[C11H10NO3+H]-	2.2220456433760245	125.0244_187.2;205.073_113.5	11	2
15.33442234316414	0.1963	InChI=1S/C21H25BrN2O3/c1-15(7-8-16-9-11-18(22)12-10-16)23-21(26)17-5-4-6-19(13-17)27-14-20(25)24(2)3/h4-6,9-13,15H,7-8,14H2,1-3H3,(H,23,26)/t15-/m1/s1	432.105	N-[(1R)-3-(4-bromophenyl)-1-methyl-propyl]-3-[2-(dimethylamino)-2-oxo-ethoxy]benzamide	98926186	C21H25BrN2O3	59.0128:[C2H2O2+H]-;205.073:[C11H11NO3]-	2.0826854640471995	59.0128_188.8;205.073_113.5	11	2
15.702061709220086	0.1959	InChI=1S/C21H25BrN2O3/c1-26-19-13-16(22)12-18(20(19)27-2)21(25)23-17-8-10-24(11-9-17)14-15-6-4-3-5-7-15/h3-7,12-13,17H,8-11,14H2,1-2H3,(H,23,25)	432.105	N-(1-benzyl-4-piperidyl)-5-bromo-2,3-dimethoxy-benzamide	15167710	C21H25BrN2O3	125.0244:[C6H7O3-H]-H-;205.073:[C11H12NO3]-H-	2.0503113334238545	125.0244_187.2;205.073_113.5	11	2
9.312812615480066	0.1957	InChI=1S/C20H15F3N4O4/c21-20(22,23)17-13-7-11(3-4-15(13)25-9-14(17)19(29)27-30)31-12-5-6-24-16(8-12)26-18(28)10-1-2-10/h3-10,30H,1-2H2,(H,27,29)(H,24,26,28)	432.105	N-[4-[[3-(hydroxycarbamoyl)-4-(trifluoromethyl)-6-quinolyl]oxy]-2-pyridyl]cyclopropanecarboxamide	58525565	C20H15F3N4O4	191.0196:[C7H4F3NO2]-	2.5057707921247183	191.0196_169.7	11	1
13.306091789997119	0.1955	InChI=1S/C21H25BrN2O3/c1-26-13-14-27-20-8-7-18(15-19(20)22)21(25)24-11-9-23(10-12-24)16-17-5-3-2-4-6-17/h2-8,15H,9-14,16H2,1H3	432.105	(4-benzylpiperazin-1-yl)-[3-bromo-4-(2-methoxyethoxy)phenyl]methanone	17174726	C21H25BrN2O3	59.0128:[C2H4O2]-H-;205.073:[C11H12NO3]-H-	2.2151734466050335	59.0128_188.8;205.073_113.5	11	2
12.634404676646183	0.1955	InChI=1S/C21H25BrN2O3/c1-26-18-8-3-15(13-19(18)27-2)9-12-23-20(25)14-24-21(10-11-21)16-4-6-17(22)7-5-16/h3-8,13,24H,9-12,14H2,1-2H3,(H,23,25)	432.105	2-[[1-(4-bromophenyl)cyclopropyl]amino]-N-[2-(3,4-dimethoxyphenyl)ethyl]acetamide	99335917	C21H25BrN2O3	205.073:[C11H13NO3-H]-H-	2.2632308365041394	205.073_113.5	11	1
12.728640444810692	0.1954	InChI=1S/C21H25BrN2O3/c1-2-26-18-7-9-19(10-8-18)27-14-13-23-20(25)15-24-21(11-12-21)16-3-5-17(22)6-4-16/h3-10,24H,2,11-15H2,1H3,(H,23,25)	432.105	2-[[1-(4-bromophenyl)cyclopropyl]amino]-N-[2-(4-ethoxyphenoxy)ethyl]acetamide	99335945	C21H25BrN2O3	205.073:[C11H13NO3-H]-H-	2.2548566821487364	205.073_113.5	11	1
12.608431098217931	0.1953	InChI=1S/C21H25BrN2O3/c1-24(14-16-8-2-3-10-18(16)22)21(25)23-19-11-4-5-12-20(19)27-15-17-9-6-7-13-26-17/h2-5,8,10-12,17H,6-7,9,13-15H2,1H3,(H,23,25)/t17-/m1/s1	432.105	1-[(2-bromophenyl)methyl]-1-methyl-3-[2-[[(2R)-tetrahydropyran-2-yl]methoxy]phenyl]urea	95674115	C21H25BrN2O3	59.0128:[C2H3O2]-;205.073:[C11H12NO3]-H-	2.2629902345759176	59.0128_188.8;205.073_113.5	11	2
12.608431098217931	0.1953	InChI=1S/C21H25BrN2O3/c1-24(14-16-9-11-17(22)12-10-16)21(25)23-19-7-2-3-8-20(19)27-15-18-6-4-5-13-26-18/h2-3,7-12,18H,4-6,13-15H2,1H3,(H,23,25)/t18-/m1/s1	432.105	1-[(4-bromophenyl)methyl]-1-methyl-3-[2-[[(2R)-tetrahydropyran-2-yl]methoxy]phenyl]urea	95674117	C21H25BrN2O3	59.0128:[C2H3O2]-;205.073:[C11H12NO3]-H-	2.2629902345759176	59.0128_188.8;205.073_113.5	11	2
11.224524736613901	0.195	InChI=1S/C21H25BrN2O3/c22-18-7-4-8-19(13-18)26-11-9-21(25)23-14-20-16-24(10-12-27-20)15-17-5-2-1-3-6-17/h1-8,13,20H,9-12,14-16H2,(H,23,25)/t20-/m0/s1	432.105	N-[[(2S)-4-benzylmorpholin-2-yl]methyl]-3-(3-bromophenoxy)propanamide	95260662	C21H25BrN2O3	205.073:[C11H12NO3]-H-	2.3565211461003996	205.073_113.5	11	1
10.014284973591964	0.195	InChI=1S/C19H20ClF3N2O4/c1-3-5-6-29-16-13(20)7-11(8-15(16)28-4-2)17(26)25-14-9-12(19(21,22)23)10-24-18(14)27/h7-10H,3-6H2,1-2H3,(H,24,27)(H,25,26)	432.106	4-butoxy-3-chloro-5-ethoxy-N-[2-oxo-5-(trifluoromethyl)-1H-pyridin-3-yl]benzamide	52652928	C19H20ClF3N2O4	191.0196:[C7H4F3NO2]-	2.4441595006730004	191.0196_169.7	11	1
8.726197069826366	0.1945	InChI=1S/C20H15F3N4O4/c1-11-6-12(17-26-18(31-27-17)20(21,22)23)2-3-13(11)9-25-19(28)30-10-15-8-24-7-14-4-5-29-16(14)15/h2-8H,9-10H2,1H3,(H,25,28)	432.105	furo[3,2-c]pyridin-7-ylmethyl N-[[2-methyl-4-[5-(trifluoromethyl)-1,2,4-oxadiazol-3-yl]phenyl]methyl]carbamate	89543326	C20H15F3N4O4	59.0128:[C2H3O2]-;205.073:[C11H10NO3+H]-	2.5270518510542197	59.0128_188.8;205.073_113.5	11	2
11.844013476270064	0.1945	InChI=1S/C20H15F3N4O4/c1-2-30-19(29)12-7-16-13(8-24)10-27(18(16)25-9-12)11-17(28)26-14-3-5-15(6-4-14)31-20(21,22)23/h3-7,9-10H,2,11H2,1H3,(H,26,28)	432.105	ethyl 3-cyano-1-[2-oxo-2-[4-(trifluoromethoxy)anilino]ethyl]pyrrolo[2,3-b]pyridine-5-carboxylate	95791325	C20H15F3N4O4	59.0128:[C2H2O2+H]-;191.0196:[C7H5F3NO2]-H-	2.3041896799637036	59.0128_188.8;191.0196_169.7	11	2
11.349994875254652	0.1942	InChI=1S/C21H25BrN2O3/c1-4-14(2)23-20(25)15(3)24-21(26)17-10-6-8-12-19(17)27-13-16-9-5-7-11-18(16)22/h5-12,14-15H,4,13H2,1-3H3,(H,23,25)(H,24,26)/t14-,15-/m0/s1	432.105	2-[(2-bromophenyl)methoxy]-N-[(1S)-1-methyl-2-[[(1S)-1-methylpropyl]amino]-2-oxo-ethyl]benzamide	99000602	C21H25BrN2O3	205.073:[C11H12NO3]-H-	2.3347440764429845	205.073_113.5	11	1
11.28398818404188	0.1939	InChI=1S/C21H25BrN2O3/c1-4-14(2)24-21(26)17-7-5-6-16(12-17)13-23-20(25)15(3)27-19-10-8-18(22)9-11-19/h5-12,14-15H,4,13H2,1-3H3,(H,23,25)(H,24,26)/t14-,15-/m0/s1	432.105	3-[[[(2S)-2-(4-bromophenoxy)propanoyl]amino]methyl]-N-[(1S)-1-methylpropyl]benzamide	98814984	C21H25BrN2O3	205.073:[C11H12NO3]-H-	2.3347437878943467	205.073_113.5	11	1
10.256385099019115	0.1934	InChI=1S/C20H23F3O3S2/c1-14-10-18(8-9-19(14)24-2)28-12-17(26-13-27-3)11-25-16-6-4-15(5-7-16)20(21,22)23/h4-10,17H,11-13H2,1-3H3	432.104	1-methoxy-2-methyl-4-[2-(methylsulfanylmethoxy)-3-[4-(trifluoromethyl)phenoxy]propyl]sulfanyl-benzene	69961587	C20H23F3O3S2	191.0196:[C7H11O2S2]-	2.4005833004750867	191.0196_169.7	11	1
14.050827313372784	0.193	InChI=1S/C21H25BrN2O3/c1-16(18-7-9-19(22)10-8-18)23-13-20-14-24(11-12-26-20)21(25)27-15-17-5-3-2-4-6-17/h2-10,16,20,23H,11-15H2,1H3	432.105	benzyl 2-[[1-(4-bromophenyl)ethylamino]methyl]morpholine-4-carboxylate	113937086	C21H25BrN2O3	59.0128:[C2H2O2+H]-;205.073:[C11H13NO3-H]-H-	2.121860375671915	59.0128_188.8;205.073_113.5	11	2
10.148624772146507	0.1927	InChI=1S/C20H15F3N4O4/c21-20(22,23)15-5-2-8-27(19(15)30)11-16(28)26-13-6-7-17(25-10-13)31-14-4-1-3-12(9-14)18(24)29/h1-10H,11H2,(H2,24,29)(H,26,28)	432.105	3-[[5-[[2-[2-oxo-3-(trifluoromethyl)-1-pyridyl]acetyl]amino]-2-pyridyl]oxy]benzamide	56321010	C20H15F3N4O4	191.0196:[C7H5F3NO2]-H-	2.3958286864877985	191.0196_169.7	11	1
10.008910867501953	0.192	InChI=1S/C21H27Cl3O3/c1-13-10-11-16(20(3,4)15-8-6-5-7-9-15)17(12-13)27-19(26)14(2)18(25)21(22,23)24/h5-9,13,16-18,25H,2,10-12H2,1,3-4H3/t13-,16-,17-,18?/m1/s1	432.103	[(1R,2S,5R)-5-methyl-2-(1-methyl-1-phenyl-ethyl)cyclohexyl] 4,4,4-trichloro-3-hydroxy-2-methylene-butanoate	10478008	C21H27Cl3O3	101.0236:[C4H4O3+H]-;125.0244:[C6H7O3-H]-H-	2.3946141065775004	101.0236_177.5;125.0244_187.2	11	2
13.05941065704062	0.192	InChI=1S/C21H25BrN2O3/c1-15(7-8-16-9-11-17(22)12-10-16)24-20(25)13-14-23-21(26)18-5-3-4-6-19(18)27-2/h3-6,9-12,15H,7-8,13-14H2,1-2H3,(H,23,26)(H,24,25)/t15-/m1/s1	432.105	N-[3-[[(1R)-3-(4-bromophenyl)-1-methyl-propyl]amino]-3-oxo-propyl]-2-methoxy-benzamide	99204422	C21H25BrN2O3	205.073:[C11H13NO3-H]-H-	2.1755228050425983	205.073_113.5	11	1
11.349994875254652	0.1913	InChI=1S/C21H25BrN2O3/c1-14(19(25)24-21(2,3)4)23-20(26)17-10-5-6-11-18(17)27-13-15-8-7-9-16(22)12-15/h5-12,14H,13H2,1-4H3,(H,23,26)(H,24,25)/t14-/m1/s1	432.105	2-[(3-bromophenyl)methoxy]-N-[(1R)-2-(tert-butylamino)-1-methyl-2-oxo-ethyl]benzamide	52771686	C21H25BrN2O3	205.073:[C11H12NO3]-H-	2.2875124251978214	205.073_113.5	11	1
10.698573503921217	0.1912	InChI=1S/C20H20FN3O5S/c21-19-13(4-2-8-23-30(27)28)3-1-5-15(19)20(26)14-6-7-16-17(11-14)24-18(12-22-16)29-10-9-25/h1,3,5-7,11-12,23,25H,2,4,8-10H2,(H,27,28)/p-1	432.103	7-[2-fluoro-3-[3-(sulfinatoamino)propyl]benzoyl]-2-(2-hydroxyethoxy)quinoxaline	89462516	C20H20FN3O5S	59.0128:[C2H5O2-H]-H-;205.073:[C11H9NO3+2H]-	2.332180032409436	59.0128_188.8;205.073_113.5	11	2
8.901474768300911	0.1912	InChI=1S/C22H19ClF2N2O3/c23-17-4-6-20(22-16(17)2-1-9-26-22)29-13-21(28)27-10-7-15(8-11-27)30-19-5-3-14(24)12-18(19)25/h1-6,9,12,15H,7-8,10-11,13H2	432.105	2-[(5-chloro-8-quinolyl)oxy]-1-[4-(2,4-difluorophenoxy)-1-piperidyl]ethanone	112843527	C22H19ClF2N2O3	59.0128:[C2H2O2+H]-;205.073:[C11H13NO3-H]-H-	2.4610211682821252	59.0128_188.8;205.073_113.5	11	2
17.036163393449556	0.1911	InChI=1S/C19H20ClF3N2O4/c1-25(10-12-6-4-5-7-15(12)29-19(21,22)23)11-18(26)24-14-8-13(20)16(27-2)9-17(14)28-3/h4-9H,10-11H2,1-3H3,(H,24,26)	432.106	N-(5-chloro-2,4-dimethoxy-phenyl)-2-[methyl-[[2-(trifluoromethoxy)phenyl]methyl]amino]acetamide	24665161	C19H20ClF3N2O4	205.073:[C9H9F3NO+H]-	1.8759617607175672	205.073_113.5	11	1
9.620858537544315	0.1911	InChI=1S/C21H25BrN2O3/c1-4-10-23-21(25)24-11-9-15-12-18(26-2)19(27-3)13-17(15)20(24)14-5-7-16(22)8-6-14/h5-8,12-13,20H,4,9-11H2,1-3H3,(H,23,25)	432.105	1-(4-bromophenyl)-6,7-dimethoxy-N-propyl-3,4-dihydro-1H-isoquinoline-2-carboxamide	42599233	C21H25BrN2O3	205.073:[C11H13NO3-H]-H-	2.4086114407291066	205.073_113.5	11	1
13.494272761167883	0.1911	InChI=1S/C21H25BrN2O3/c1-21(2,3)15-8-11-18(17(22)13-15)27-12-4-5-19(25)24-16-9-6-14(7-10-16)20(23)26/h6-11,13H,4-5,12H2,1-3H3,(H2,23,26)(H,24,25)	432.105	4-[4-(2-bromo-4-tert-butyl-phenoxy)butanoylamino]benzamide	19201903	C21H25BrN2O3	205.073:[C11H11NO3]-	2.130217382973539	205.073_113.5	11	1
22.233586083782015	0.1907	InChI=1S/C18H20N6O3S2/c1-4-27-16(26)11-5-7-12(8-6-11)21-13(25)9-28-18-23-22-15(24(18)3)14-10(2)20-17(19)29-14/h5-8H,4,9H2,1-3H3,(H2,19,20)(H,21,25)	432.104	ethyl 4-[[2-[[5-(2-amino-4-methyl-thiazol-5-yl)-4-methyl-1,2,4-triazol-3-yl]sulfanyl]acetyl]amino]benzoate	16439116	C18H20N6O3S2	59.0128:[C2H2O2+H]-;205.073:[C11H12NO3]-H-	1.4972865222777645	59.0128_188.8;205.073_113.5	11	2
10.334883655664278	0.1905	InChI=1S/C21H25BrN2O3/c1-3-26-19-10-7-17(15-20(19)27-4-2)12-14-24-21(25)23-13-11-16-5-8-18(22)9-6-16/h5-11,13,15H,3-4,12,14H2,1-2H3,(H2,23,24,25)/b13-11+	432.105	1-[(E)-2-(4-bromophenyl)vinyl]-3-[2-(3,4-diethoxyphenyl)ethyl]urea	108908886	C21H25BrN2O3	205.073:[C11H14NO3-2H]-H-	2.347071451294809	205.073_113.5	11	1
10.334883655664278	0.1905	InChI=1S/C21H25BrN2O3/c1-3-26-19-9-8-17(15-20(19)27-4-2)11-13-24-21(25)23-12-10-16-6-5-7-18(22)14-16/h5-10,12,14-15H,3-4,11,13H2,1-2H3,(H2,23,24,25)/b12-10+	432.105	1-[(E)-2-(3-bromophenyl)vinyl]-3-[2-(3,4-diethoxyphenyl)ethyl]urea	108907029	C21H25BrN2O3	205.073:[C11H14NO3-2H]-H-	2.347071451294809	205.073_113.5	11	1
13.32099925561305	0.1902	InChI=1S/C21H25BrN2O3/c1-3-12-23-21(26)16(2)24(14-17-8-7-9-18(22)13-17)20(25)15-27-19-10-5-4-6-11-19/h4-11,13,16H,3,12,14-15H2,1-2H3,(H,23,26)/t16-/m0/s1	432.105	(2S)-2-[(3-bromophenyl)methyl-(2-phenoxyacetyl)amino]-N-propyl-propanamide	100327570	C21H25BrN2O3	59.0128:[C2H2O2+H]-;205.073:[C11H12NO3]-H-	2.1282122181340806	59.0128_188.8;205.073_113.5	11	2
9.513391801353375	0.1902	InChI=1S/C21H25BrN2O3/c1-4-14(3)23-21(26)16-7-6-8-17(12-16)24-20(25)13-27-19-10-9-15(5-2)11-18(19)22/h6-12,14H,4-5,13H2,1-3H3,(H,23,26)(H,24,25)	432.105	3-[[2-(2-bromo-4-ethyl-phenoxy)acetyl]amino]-N-sec-butyl-benzamide	17198829	C21H25BrN2O3	59.0128:[C2H3O2]-;205.073:[C11H9NO3+2H]-	2.4019838109610454	59.0128_188.8;205.073_113.5	11	2
13.32099925561305	0.1902	InChI=1S/C21H25BrN2O3/c1-3-13-23-21(26)16(2)24(14-17-9-11-18(22)12-10-17)20(25)15-27-19-7-5-4-6-8-19/h4-12,16H,3,13-15H2,1-2H3,(H,23,26)/t16-/m0/s1	432.105	(2S)-2-[(4-bromophenyl)methyl-(2-phenoxyacetyl)amino]-N-propyl-propanamide	100334864	C21H25BrN2O3	59.0128:[C2H2O2+H]-;205.073:[C11H12NO3]-H-	2.1282122181340806	59.0128_188.8;205.073_113.5	11	2
13.32099925561305	0.19	InChI=1S/C21H25BrN2O3/c1-15(2)23-21(26)16(3)24(13-17-9-11-18(22)12-10-17)20(25)14-27-19-7-5-4-6-8-19/h4-12,15-16H,13-14H2,1-3H3,(H,23,26)/t16-/m0/s1	432.105	(2S)-2-[(4-bromophenyl)methyl-(2-phenoxyacetyl)amino]-N-isopropyl-propanamide	100464517	C21H25BrN2O3	59.0128:[C2H2O2+H]-;205.073:[C11H12NO3]-H-	2.124572416630954	59.0128_188.8;205.073_113.5	11	2
13.32099925561305	0.19	InChI=1S/C21H25BrN2O3/c1-15(2)23-21(26)16(3)24(13-17-8-7-9-18(22)12-17)20(25)14-27-19-10-5-4-6-11-19/h4-12,15-16H,13-14H2,1-3H3,(H,23,26)/t16-/m0/s1	432.105	(2S)-2-[(3-bromophenyl)methyl-(2-phenoxyacetyl)amino]-N-isopropyl-propanamide	100458906	C21H25BrN2O3	59.0128:[C2H2O2+H]-;205.073:[C11H12NO3]-H-	2.124572416630954	59.0128_188.8;205.073_113.5	11	2
22.233586083782015	0.1899	InChI=1S/C18H20N6O3S2/c1-3-27-16(26)11-4-6-12(7-5-11)20-15(25)10-29-18-23-22-14(24(18)2)8-13-9-28-17(19)21-13/h4-7,9H,3,8,10H2,1-2H3,(H2,19,21)(H,20,25)	432.104	ethyl 4-[[2-[[5-[(2-aminothiazol-4-yl)methyl]-4-methyl-1,2,4-triazol-3-yl]sulfanyl]acetyl]amino]benzoate	2064354	C18H20N6O3S2	59.0128:[C2H2O2+H]-;205.073:[C11H12NO3]-H-	1.4848610683813144	59.0128_188.8;205.073_113.5	11	2
13.538280558830525	0.1894	InChI=1S/C23H17FN4O2S/c1-2-30-23(29)18-19-20(31-22(18)27-15-10-8-14(24)9-11-15)17(13-6-4-3-5-7-13)16(12-25)21(26)28-19/h3-11,27H,2H2,1H3,(H2,26,28)	432.106	ethyl 5-amino-6-cyano-2-(4-fluoroanilino)-7-phenyl-thieno[3,2-b]pyridine-3-carboxylate	17015120	C23H17FN4O2S	59.0128:[C2H2O2+H]-;191.0196:[C10H5FNS+H]-	2.1005250134110973	59.0128_188.8;191.0196_169.7	11	2
11.224524736613901	0.1894	InChI=1S/C21H25BrN2O3/c1-15-10-17(22)11-19(26-2)21(15)23-20(25)12-18-14-24(8-9-27-18)13-16-6-4-3-5-7-16/h3-7,10-11,18H,8-9,12-14H2,1-2H3,(H,23,25)	432.105	2-(4-benzylmorpholin-2-yl)-N-(4-bromo-2-methoxy-6-methyl-phenyl)acetamide	60336996	C21H25BrN2O3	205.073:[C11H12NO3]-H-	2.265028731738064	205.073_113.5	11	1
13.494272761167883	0.1894	InChI=1S/C21H25BrN2O3/c1-14(2)13-23-21(26)16-7-8-19(15(3)11-16)24-20(25)9-10-27-18-6-4-5-17(22)12-18/h4-8,11-12,14H,9-10,13H2,1-3H3,(H,23,26)(H,24,25)	432.105	4-[3-(3-bromophenoxy)propanoylamino]-N-isobutyl-3-methyl-benzamide	56231752	C21H25BrN2O3	205.073:[C11H11NO3]-	2.103083830076032	205.073_113.5	11	1
9.747511251977706	0.1894	InChI=1S/C21H25BrN2O3/c1-13-7-14(2)21(15(3)8-13)23-20(25)12-24(4)11-16-9-18-19(10-17(16)22)27-6-5-26-18/h7-10H,5-6,11-12H2,1-4H3,(H,23,25)	432.105	2-[(6-bromo-2,3-dihydro-1,4-benzodioxin-7-yl)methyl-methyl-amino]-N-(2,4,6-trimethylphenyl)acetamide	17542159	C21H25BrN2O3	59.0128:[C2H4O2]-H-;205.073:[C11H14NO3-2H]-H-	2.3720792766795165	59.0128_188.8;205.073_113.5	11	2
11.791846261535314	0.1888	InChI=1S/C21H25BrN2O3/c1-3-13-27-20-18(22)14-16(15-19(20)26-2)21(25)24-11-9-23(10-12-24)17-7-5-4-6-8-17/h4-8,14-15H,3,9-13H2,1-2H3	432.105	(3-bromo-5-methoxy-4-propoxy-phenyl)-(4-phenylpiperazin-1-yl)methanone	2500846	C21H25BrN2O3	205.073:[C11H12NO3]-H-	2.2150243068248243	205.073_113.5	11	1
15.702061709220086	0.1887	InChI=1S/C21H25BrN2O3/c1-26-18-9-8-17(22)20(27-2)19(18)21(25)23-16-10-12-24(13-11-16)14-15-6-4-3-5-7-15/h3-9,16H,10-14H2,1-2H3,(H,23,25)	432.105	N-(1-benzyl-4-piperidyl)-3-bromo-2,6-dimethoxy-benzamide	13202171	C21H25BrN2O3	125.0244:[C6H7O3-H]-H-;205.073:[C11H12NO3]-H-	1.9330408960129801	125.0244_187.2;205.073_113.5	11	2
15.944715373474061	0.1886	InChI=1S/C21H25BrN2O3/c1-26-19-12-16(22)11-18(20(19)27-2)21(25)23-13-17-9-6-10-24(17)14-15-7-4-3-5-8-15/h3-5,7-8,11-12,17H,6,9-10,13-14H2,1-2H3,(H,23,25)/t17-/m1/s1	432.105	N-[[(2R)-1-benzylpyrrolidin-2-yl]methyl]-5-bromo-2,3-dimethoxy-benzamide	14894156	C21H25BrN2O3	125.0244:[C6H7O3-H]-H-;205.073:[C11H12NO3]-H-	1.9145304713223663	125.0244_187.2;205.073_113.5	11	2
13.610261276408536	0.1883	InChI=1S/C21H25BrN2O3/c1-13(2)16-6-5-7-18(11-16)27-15(4)21(26)23-12-20(25)24-19-9-8-17(22)10-14(19)3/h5-11,13,15H,12H2,1-4H3,(H,23,26)(H,24,25)/t15-/m0/s1	432.105	(2S)-N-[2-(4-bromo-2-methyl-anilino)-2-oxo-ethyl]-2-(3-isopropylphenoxy)propanamide	98675376	C21H25BrN2O3	205.073:[C11H11NO3]-	2.077294047714853	205.073_113.5	11	1
12.889870603678743	0.1882	InChI=1S/C21H25BrN2O3/c1-14(2)16-5-8-18(9-6-16)27-13-21(26)23-11-10-20(25)24-19-12-17(22)7-4-15(19)3/h4-9,12,14H,10-11,13H2,1-3H3,(H,23,26)(H,24,25)	432.105	N-(5-bromo-2-methyl-phenyl)-3-[[2-(4-isopropylphenoxy)acetyl]amino]propanamide	56266699	C21H25BrN2O3	59.0128:[C2H3O2]-;205.073:[C11H12NO3]-H-	2.1266240125330373	59.0128_188.8;205.073_113.5	11	2
11.28398818404188	0.1881	InChI=1S/C21H25BrN2O3/c1-3-15(2)23-21(26)16-9-4-6-11-18(16)24-20(25)13-8-14-27-19-12-7-5-10-17(19)22/h4-7,9-12,15H,3,8,13-14H2,1-2H3,(H,23,26)(H,24,25)/t15-/m0/s1	432.105	2-[4-(2-bromophenoxy)butanoylamino]-N-[(1S)-1-methylpropyl]benzamide	99483225	C21H25BrN2O3	205.073:[C11H12NO3]-H-	2.240298382397521	205.073_113.5	11	1
16.380462319301913	0.1877	InChI=1S/C20H15F3N4O4/c1-12-3-2-4-16(27(30)31)19(12)25-17(28)10-26-11-24-15(9-18(26)29)13-5-7-14(8-6-13)20(21,22)23/h2-9,11H,10H2,1H3,(H,25,28)	432.105	N-(2-methyl-6-nitro-phenyl)-2-[6-oxo-4-[4-(trifluoromethyl)phenyl]pyrimidin-1-yl]acetamide	25885154	C20H15F3N4O4	125.0244:[C4H4N3O2]-H-;191.0196:[C10H5F2NO-H]-H-	1.8686472381400043	125.0244_187.2;191.0196_169.7	11	2
13.102676739421721	0.1874	InChI=1S/C21H25BrN2O3/c1-14-9-17(5-6-18(14)22)23(2)13-21(25)24-8-7-15-10-19(26-3)20(27-4)11-16(15)12-24/h5-6,9-11H,7-8,12-13H2,1-4H3	432.105	2-(4-bromo-N,3-dimethyl-anilino)-1-(6,7-dimethoxy-3,4-dihydro-1H-isoquinolin-2-yl)ethanone	86964303	C21H25BrN2O3	205.073:[C11H11NO3]-	2.0992098921636764	205.073_113.5	11	1
14.378476614758647	0.1871	InChI=1S/C21H25BrN2O3/c1-5-24(6-2)17-10-8-16(9-11-17)23-20(25)12-7-15-13-18(22)21(27-4)19(14-15)26-3/h7-14H,5-6H2,1-4H3,(H,23,25)	432.105	3-(3-bromo-4,5-dimethoxy-phenyl)-N-[4-(diethylamino)phenyl]prop-2-enamide	5044495	C21H25BrN2O3	205.073:[C11H11NO3]-	2.0024598874774466	205.073_113.5	11	1
20.354944536607185	0.187	InChI=1S/C23H17FN4O2S/c1-14-20(31-23(26-14)15-5-7-17(24)8-6-15)22(30)28-19-4-2-3-16(13-19)21(29)27-18-9-11-25-12-10-18/h2-13H,1H3,(H,28,30)(H,25,27,29)	432.106	2-(4-fluorophenyl)-4-methyl-N-[3-(4-pyridylcarbamoyl)phenyl]thiazole-5-carboxamide	56327880	C23H17FN4O2S	191.0196:[C10H7FNS]-H-	1.5715180304075795	191.0196_169.7	11	1
16.131319522445587	0.1867	InChI=1S/C20H15F3N4O4/c1-11-5-7-12(8-6-11)16(28)26-24-10-15-17(29)25-19(31)27(18(15)30)14-4-2-3-13(9-14)20(21,22)23/h2-10,15H,1H3,(H,26,28)(H,25,29,31)	432.105	4-methyl-N-[[2,4,6-trioxo-1-[3-(trifluoromethyl)phenyl]hexahydropyrimidin-5-yl]methyleneamino]benzamide	4027545	C20H15F3N4O4	125.0244:[C4H4N3O2]-H-;191.0196:[C7H5N4O3-H]-H-	1.8699850108912017	125.0244_187.2;191.0196_169.7	11	2
9.004517927972005	0.1865	InChI=1S/C22H19ClF2N2O3/c23-15-3-1-2-12(6-15)9-18-19(20(14-4-5-14)27-22(29)26-18)21(28)30-11-13-7-16(24)10-17(25)8-13/h1-3,6-8,10,14,20H,4-5,9,11H2,(H2,26,27,29)	432.105	(3,5-difluorophenyl)methyl 6-[(3-chlorophenyl)methyl]-4-cyclopropyl-2-oxo-3,4-dihydro-1H-pyrimidine-5-carboxylate	68848291	C22H19ClF2N2O3	59.0128:[C2H2O2+H]-;205.073:[C11H12NO3]-H-	2.377284550585116	59.0128_188.8;205.073_113.5	11	2
13.494272761167883	0.1863	InChI=1S/C21H25BrN2O3/c1-3-24(4-2)21(26)16-8-5-10-18(14-16)23-20(25)12-7-13-27-19-11-6-9-17(22)15-19/h5-6,8-11,14-15H,3-4,7,12-13H2,1-2H3,(H,23,25)	432.105	3-[4-(3-bromophenoxy)butanoylamino]-N,N-diethyl-benzamide	26070888	C21H25BrN2O3	205.073:[C11H11NO3]-	2.0521190120352886	205.073_113.5	11	1
9.978317744472504	0.1862	InChI=1S/C22H19ClF2N2O3/c23-15-3-1-2-12(6-15)9-18-19(20(14-4-5-14)27-22(29)26-18)21(28)30-11-13-7-16(24)10-17(25)8-13/h1-3,6-8,10,14,19-20H,4-5,9,11H2,(H,27,29)	432.105	(3,5-difluorophenyl)methyl 4-[(3-chlorophenyl)methyl]-6-cyclopropyl-2-oxo-5,6-dihydro-1H-pyrimidine-5-carboxylate	90806268	C22H19ClF2N2O3	59.0128:[C2H2O2+H]-;205.073:[C11H12NO3]-H-	2.3031109688207447	59.0128_188.8;205.073_113.5	11	2
13.008149250797484	0.1862	InChI=1S/C21H25BrN2O3/c1-14(2)18-12-16(22)7-10-19(18)27-13-21(26)24-17-8-4-15(5-9-17)6-11-20(25)23-3/h4-5,7-10,12,14H,6,11,13H2,1-3H3,(H,23,25)(H,24,26)	432.105	3-[4-[[2-(4-bromo-2-isopropyl-phenoxy)acetyl]amino]phenyl]-N-methyl-propanamide	54781048	C21H25BrN2O3	59.0128:[C2H2O2+H]-;205.073:[C11H12NO3]-H-	2.0859197848194344	59.0128_188.8;205.073_113.5	11	2
9.513391801353375	0.1861	InChI=1S/C21H25BrN2O3/c1-3-5-11-23-21(26)16-7-6-8-17(13-16)24-20(25)14-27-19-10-9-15(4-2)12-18(19)22/h6-10,12-13H,3-5,11,14H2,1-2H3,(H,23,26)(H,24,25)	432.105	3-[[2-(2-bromo-4-ethyl-phenoxy)acetyl]amino]-N-butyl-benzamide	17196941	C21H25BrN2O3	59.0128:[C2H3O2]-;205.073:[C11H9NO3+2H]-	2.3346585898599677	59.0128_188.8;205.073_113.5	11	2
0.0	0.1861	InChI=1S/C21H25BrN2O3/c1-13(15-8-9-20(26-3)17(22)12-15)23-14(2)21(25)24-18-10-11-27-19-7-5-4-6-16(18)19/h4-9,12-14,18,23H,10-11H2,1-3H3,(H,24,25)	432.105	2-[1-(3-bromo-4-methoxy-phenyl)ethylamino]-N-chroman-4-yl-propanamide	112811708	C21H25BrN2O3	NA	3.0182334240077955	NA	11	0
13.008149250797484	0.1858	InChI=1S/C21H25BrN2O3/c1-15(2)13-23-20(25)12-5-16-3-8-18(9-4-16)24-21(26)14-27-19-10-6-17(22)7-11-19/h3-4,6-11,15H,5,12-14H2,1-2H3,(H,23,25)(H,24,26)	432.105	3-[4-[[2-(4-bromophenoxy)acetyl]amino]phenyl]-N-isobutyl-propanamide	17358833	C21H25BrN2O3	59.0128:[C2H2O2+H]-;205.073:[C11H12NO3]-H-	2.0793897831134287	59.0128_188.8;205.073_113.5	11	2
10.126321133726542	0.1857	InChI=1S/C20H15F3N4O4/c1-29-11-5-6-13(16(8-11)30-2)26-19(28)12-10-24-27-17(20(21,22)23)9-14(25-18(12)27)15-4-3-7-31-15/h3-10H,1-2H3,(H,26,28)	432.105	N-(2,4-dimethoxyphenyl)-5-(2-furyl)-7-(trifluoromethyl)pyrazolo[1,5-a]pyrimidine-3-carboxamide	1370028	C20H15F3N4O4	205.073:[C11H11NO3]-	2.284883043122957	205.073_113.5	11	1
11.349994875254652	0.1857	InChI=1S/C21H25BrN2O3/c1-4-19(15-5-9-17(22)10-6-15)24-20(25)13-23-21(26)16-7-11-18(12-8-16)27-14(2)3/h5-12,14,19H,4,13H2,1-3H3,(H,23,26)(H,24,25)/t19-/m0/s1	432.105	N-[2-[[(1S)-1-(4-bromophenyl)propyl]amino]-2-oxo-ethyl]-4-isopropoxy-benzamide	26776301	C21H25BrN2O3	205.073:[C11H12NO3]-H-	2.1968847250222168	205.073_113.5	11	1
10.126321133726542	0.1857	InChI=1S/C20H15F3N4O4/c1-29-11-5-6-12(16(8-11)30-2)25-19(28)14-10-18-24-13(15-4-3-7-31-15)9-17(20(21,22)23)27(18)26-14/h3-10H,1-2H3,(H,25,28)	432.105	N-(2,4-dimethoxyphenyl)-5-(2-furyl)-7-(trifluoromethyl)pyrazolo[1,5-a]pyrimidine-2-carboxamide	1354235	C20H15F3N4O4	205.073:[C11H11NO3]-	2.284883043122957	205.073_113.5	11	1
10.840568305085787	0.1857	InChI=1S/C20H15F3N4O4/c1-3-31-19(30)16-10(2)27-15-7-14(26-5-4-11(8-26)9-28)12(20(21,22)23)6-13(15)24-18(29)17(27)25-16/h4-9H,3H2,1-2H3,(H,24,29)	432.105	ethyl 8-(3-formylpyrrol-1-yl)-1-methyl-4-oxo-7-(trifluoromethyl)-5H-imidazo[1,2-a]quinoxaline-2-carboxylate	15817046	C20H15F3N4O4	59.0128:[C2H2O2+H]-;191.0196:[C10H6F2NO-2H]-H-	2.233825276191492	59.0128_188.8;191.0196_169.7	11	2
10.126321133726542	0.1857	InChI=1S/C20H15F3N4O4/c1-29-15-6-5-11(8-16(15)30-2)24-19(28)13-10-18-25-12(14-4-3-7-31-14)9-17(20(21,22)23)27(18)26-13/h3-10H,1-2H3,(H,24,28)	432.105	N-(3,4-dimethoxyphenyl)-5-(2-furyl)-7-(trifluoromethyl)pyrazolo[1,5-a]pyrimidine-2-carboxamide	1165026	C20H15F3N4O4	205.073:[C11H11NO3]-	2.284412244510431	205.073_113.5	11	1
10.126321133726542	0.1857	InChI=1S/C20H15F3N4O4/c1-29-15-6-5-11(8-16(15)30-2)25-19(28)12-10-24-27-17(20(21,22)23)9-13(26-18(12)27)14-4-3-7-31-14/h3-10H,1-2H3,(H,25,28)	432.105	N-(3,4-dimethoxyphenyl)-5-(2-furyl)-7-(trifluoromethyl)pyrazolo[1,5-a]pyrimidine-3-carboxamide	1361318	C20H15F3N4O4	205.073:[C11H11NO3]-	2.284412244510431	205.073_113.5	11	1
9.712503749840335	0.1853	InChI=1S/C21H25BrN2O3/c1-3-20-8-4-9-23-10-7-15-14-6-5-13(22)11-16(14)24(17(15)18(20)23)21(26,12-20)19(25)27-2/h5-6,11,18,26H,3-4,7-10,12H2,1-2H3/t18-,20-,21+/m0/s1	432.105	NA	100901037	C21H25BrN2O3	59.0128:[C2H3O2]-;89.0232:[C3H4O3+H]-;101.0236:[C4H6O3]-H-	2.3080517262824474	59.0128_188.8;89.0232_90.6;101.0236_177.5	11	3
9.620858537544315	0.1848	InChI=1S/C21H25BrN2O3/c22-16-6-4-7-17(14-16)23-21(26)19-9-8-18(15-20(19)25)27-13-5-12-24-10-2-1-3-11-24/h4,6-9,14-15,25H,1-3,5,10-13H2,(H,23,26)	432.105	N-(3-bromophenyl)-2-hydroxy-4-[3-(1-piperidyl)propoxy]benzamide	91937894	C21H25BrN2O3	205.073:[C11H13NO3-H]-H-	2.305652932304752	205.073_113.5	11	1
17.036163393449556	0.1848	InChI=1S/C19H20ClF3N2O4/c1-25(10-12-6-4-5-7-15(12)29-19(21,22)23)11-18(26)24-14-9-16(27-2)13(20)8-17(14)28-3/h4-9H,10-11H2,1-3H3,(H,24,26)	432.106	N-(4-chloro-2,5-dimethoxy-phenyl)-2-[methyl-[[2-(trifluoromethoxy)phenyl]methyl]amino]acetamide	24665164	C19H20ClF3N2O4	205.073:[C9H9F3NO+H]-	1.774538413221437	205.073_113.5	11	1
7.653560975708055	0.1842	InChI=1S/C15H21N4O9P/c1-9-6-19(15(22)17-13(9)21)14-12(26-5-4-18-3-2-16-8-18)11(20)10(28-14)7-27-29(23,24)25/h2-3,6,8,10-12,14,20H,4-5,7H2,1H3,(H,17,21,22)(H2,23,24,25)	432.105	[3-hydroxy-4-(2-imidazol-1-ylethoxy)-5-(5-methyl-2,4-dioxo-pyrimidin-1-yl)tetrahydrofuran-2-yl]methyl dihydrogen phosphate	23644268	C15H21N4O9P	59.0128:[C2H3O2]-;89.0232:[C3H5O3]-;96.9687:[H2O4P]-	2.437877994093053	59.0128_188.8;89.0232_90.6;96.9687_95.7	11	3
11.28944294669472	0.1842	InChI=1S/C21H25BrN2O3/c1-14-12-17(22)20(27-2)18(19(14)25)21(26)23-16-8-10-24(11-9-16)13-15-6-4-3-5-7-15/h3-7,12,16,25H,8-11,13H2,1-2H3,(H,23,26)	432.105	N-(1-benzyl-4-piperidyl)-5-bromo-2-hydroxy-6-methoxy-3-methyl-benzamide	15167708	C21H25BrN2O3	205.073:[C11H12NO3]-H-	2.1770480354050017	205.073_113.5	11	1
10.086065904781174	0.1842	InChI=1S/C21H25BrN2O3/c1-14-10-11-18(16(22)12-14)24(4)20(25)23-17-13-26-21(2,3)27-19(17)15-8-6-5-7-9-15/h5-12,17,19H,13H2,1-4H3,(H,23,25)/t17-,19-/m0/s1	432.105	1-(2-bromo-4-methyl-phenyl)-3-[(4S,5S)-2,2-dimethyl-4-phenyl-1,3-dioxan-5-yl]-1-methyl-urea	70343614	C21H25BrN2O3	59.0128:[C2H3O2]-;205.073:[C11H14NO3-2H]-H-	2.2623609918923697	59.0128_188.8;205.073_113.5	11	2
19.788430093852135	0.1842	InChI=1S/C20H15F3N4O4/c21-20(22,23)13-25(12-14-6-4-5-9-17(14)27(30)31)19(29)16-10-11-18(28)26(24-16)15-7-2-1-3-8-15/h1-11H,12-13H2	432.105	N-[(2-nitrophenyl)methyl]-6-oxo-1-phenyl-N-(2,2,2-trifluoroethyl)pyridazine-3-carboxamide	52638416	C20H15F3N4O4	191.0196:[C7H4F3NO2]-;205.073:[C9H8F3NO+2H]-	1.5670937671424776	191.0196_169.7;205.073_113.5	11	2
11.670084395600478	0.1842	InChI=1S/C21H25BrN2O3/c1-26-20-9-5-4-8-18(20)24-21(25)14-27-19-11-10-16(22)12-15(19)13-23-17-6-2-3-7-17/h4-5,8-12,17,23H,2-3,6-7,13-14H2,1H3,(H,24,25)	432.105	2-[4-bromo-2-[(cyclopentylamino)methyl]phenoxy]-N-(2-methoxyphenyl)acetamide	979929	C21H25BrN2O3	59.0128:[C2H3O2]-;205.073:[C11H11NO3]-	2.1497767372437995	59.0128_188.8;205.073_113.5	11	2
8.790569555268082	0.1841	InChI=1S/C20H15F3N4O4/c1-11(28)25-14-7-5-13(6-8-14)24-10-16-17(29)26-19(31)27(18(16)30)15-4-2-3-12(9-15)20(21,22)23/h2-10,24H,1H3,(H,25,28)(H,26,29,31)	432.105	N-[4-[[2,4,6-trioxo-1-[3-(trifluoromethyl)phenyl]hexahydropyrimidin-5-ylidene]methylamino]phenyl]acetamide	6799262	C20H15F3N4O4	191.0196:[C7H2F3NO2+2H]-	2.355149078807899	191.0196_169.7	11	1
15.205430753238861	0.1839	InChI=1S/C18H20N6O3S2/c1-11-13(15(26)21-17(19-11)24-5-7-27-8-6-24)2-3-14(25)20-18-23-22-16(29-18)12-4-9-28-10-12/h4,9-10H,2-3,5-8H2,1H3,(H,19,21,26)(H,20,23,25)	432.104	3-(6-methyl-2-morpholino-4-oxo-1H-pyrimidin-5-yl)-N-[5-(3-thienyl)-1,3,4-thiadiazol-2-yl]propanamide	55922114	C18H20N6O3S2	125.0244:[C4H5N3O2-H]-H-;205.073:[C9H11N4O2-H]-H-	1.891697637195813	125.0244_187.2;205.073_113.5	11	2
11.28398818404188	0.1838	InChI=1S/C21H25BrN2O3/c1-15(14-16-5-9-18(22)10-6-16)24-20(25)4-3-13-23-21(26)17-7-11-19(27-2)12-8-17/h5-12,15H,3-4,13-14H2,1-2H3,(H,23,26)(H,24,25)/t15-/m1/s1	432.105	N-[4-[[(1R)-2-(4-bromophenyl)-1-methyl-ethyl]amino]-4-oxo-butyl]-4-methoxy-benzamide	98825285	C21H25BrN2O3	205.073:[C11H12NO3]-H-	2.1711028566969808	205.073_113.5	11	1
9.981559793795375	0.1837	InChI=1S/C23H14F2N4O3/c24-16-3-2-13(22(26)32)20(25)19(16)21(31)15-9-28-23-14(15)6-12(8-27-23)10-1-4-17-11(5-10)7-18(30)29-17/h1-6,8-9H,7H2,(H2,26,32)(H,27,28)(H,29,30)	432.103	2,4-difluoro-3-[5-(2-oxoindolin-5-yl)-1H-pyrrolo[2,3-b]pyridine-3-carbonyl]benzamide	70922078	C23H14F2N4O3	191.0196:[C10H4F2NO]-H-	2.2629470974342807	191.0196_169.7	11	1
11.532096610948697	0.1832	InChI=1S/C21H25BrN2O3/c1-3-27-20-18(22)13-17(14-19(20)26-2)21(25)24-11-9-23(10-12-24)15-16-7-5-4-6-8-16/h4-8,13-14H,3,9-12,15H2,1-2H3	432.105	(4-benzylpiperazin-1-yl)-(3-bromo-4-ethoxy-5-methoxy-phenyl)methanone	2425881	C21H25BrN2O3	205.073:[C11H12NO3]-H-	2.1429368964626754	205.073_113.5	11	1
9.513391801353375	0.1831	InChI=1S/C21H25BrN2O3/c1-13(2)18-11-16(22)8-9-19(18)27-12-20(25)24-17-7-5-6-15(10-17)21(26)23-14(3)4/h5-11,13-14H,12H2,1-4H3,(H,23,26)(H,24,25)	432.105	3-[[2-(4-bromo-2-isopropyl-phenoxy)acetyl]amino]-N-isopropyl-benzamide	17197558	C21H25BrN2O3	59.0128:[C2H3O2]-;205.073:[C11H9NO3+2H]-	2.2869082760793225	59.0128_188.8;205.073_113.5	11	2
16.20741251341645	0.1831	InChI=1S/C18H20N6O3S2/c1-2-8-23(13(25)10-28-18-22-20-11-29-18)14-15(19)24(17(27)21-16(14)26)9-12-6-4-3-5-7-12/h3-7,11H,2,8-10,19H2,1H3,(H,21,26,27)	432.104	N-(6-amino-1-benzyl-2,4-dioxo-pyrimidin-5-yl)-N-propyl-2-(1,3,4-thiadiazol-2-ylsulfanyl)acetamide	42970957	C18H20N6O3S2	125.0244:[C4H3N3O2]-;205.073:[C9H12N4O2-2H]-H-	1.8057824497245862	125.0244_187.2;205.073_113.5	11	2
16.168452318101096	0.1831	InChI=1S/C23H14F2N4O3/c24-17-10-16(11-18(25)12-17)19-6-7-21(30)29(27-19)13-14-3-1-4-15(9-14)22-26-23(32-28-22)20-5-2-8-31-20/h1-12H,13H2	432.103	6-(3,5-difluorophenyl)-2-[[3-[5-(2-furyl)-1,2,4-oxadiazol-3-yl]phenyl]methyl]pyridazin-3-one	58497262	C23H14F2N4O3	191.0196:[C10H5F2NO-H]-H-	1.8090903901889448	191.0196_169.7	11	1
14.174280405070274	0.183	InChI=1S/C21H25BrN2O3/c1-26-18-8-4-6-16(12-18)20(24-10-2-3-11-24)14-23-21(25)15-27-19-9-5-7-17(22)13-19/h4-9,12-13,20H,2-3,10-11,14-15H2,1H3,(H,23,25)	432.105	2-(3-bromophenoxy)-N-[2-(3-methoxyphenyl)-2-pyrrolidin-1-yl-ethyl]acetamide	112767419	C21H25BrN2O3	59.0128:[C2H3O2]-;205.073:[C11H13NO3-H]-H-	1.9504967379106966	59.0128_188.8;205.073_113.5	11	2
14.174280405070274	0.183	InChI=1S/C21H25BrN2O3/c1-26-18-8-4-16(5-9-18)20(24-12-2-3-13-24)14-23-21(25)15-27-19-10-6-17(22)7-11-19/h4-11,20H,2-3,12-15H2,1H3,(H,23,25)/t20-/m0/s1	432.105	2-(4-bromophenoxy)-N-[(2R)-2-(4-methoxyphenyl)-2-pyrrolidin-1-yl-ethyl]acetamide	42387432	C21H25BrN2O3	59.0128:[C2H3O2]-;205.073:[C11H13NO3-H]-H-	1.9504967379106966	59.0128_188.8;205.073_113.5	11	2
14.174280405070274	0.183	InChI=1S/C21H25BrN2O3/c1-26-18-9-7-16(8-10-18)20(24-11-2-3-12-24)14-23-21(25)15-27-19-6-4-5-17(22)13-19/h4-10,13,20H,2-3,11-12,14-15H2,1H3,(H,23,25)	432.105	2-(3-bromophenoxy)-N-[2-(4-methoxyphenyl)-2-pyrrolidin-1-yl-ethyl]acetamide	112789952	C21H25BrN2O3	59.0128:[C2H3O2]-;205.073:[C11H13NO3-H]-H-	1.9504967379106966	59.0128_188.8;205.073_113.5	11	2
14.174280405070274	0.183	InChI=1S/C21H25BrN2O3/c1-26-19-6-4-5-16(13-19)20(24-11-2-3-12-24)14-23-21(25)15-27-18-9-7-17(22)8-10-18/h4-10,13,20H,2-3,11-12,14-15H2,1H3,(H,23,25)	432.105	2-(4-bromophenoxy)-N-[2-(3-methoxyphenyl)-2-pyrrolidin-1-yl-ethyl]acetamide	43003277	C21H25BrN2O3	59.0128:[C2H3O2]-;205.073:[C11H13NO3-H]-H-	1.9504967379106966	59.0128_188.8;205.073_113.5	11	2
9.513391801353375	0.1829	InChI=1S/C21H25BrN2O3/c1-4-14(3)15-9-10-19(18(22)12-15)27-13-20(25)24-17-8-6-7-16(11-17)21(26)23-5-2/h6-12,14H,4-5,13H2,1-3H3,(H,23,26)(H,24,25)	432.105	3-[[2-(2-bromo-4-sec-butyl-phenoxy)acetyl]amino]-N-ethyl-benzamide	17230821	C21H25BrN2O3	59.0128:[C2H3O2]-;205.073:[C11H9NO3+2H]-	2.28305723542798	59.0128_188.8;205.073_113.5	11	2
15.77721248167075	0.1829	InChI=1S/C21H25BrN2O3/c1-4-24(13-15(2)3)21(26)18-7-5-6-8-19(18)27-14-20(25)23-17-11-9-16(22)10-12-17/h5-12,15H,4,13-14H2,1-3H3,(H,23,25)	432.105	2-[2-(4-bromoanilino)-2-oxo-ethoxy]-N-ethyl-N-isobutyl-benzamide	112817709	C21H25BrN2O3	59.0128:[C2H2O2+H]-;205.073:[C11H11NO3]-	1.8331859790223013	59.0128_188.8;205.073_113.5	11	2
9.513391801353375	0.1828	InChI=1S/C21H25BrN2O3/c1-5-23-20(26)14-7-6-8-16(11-14)24-19(25)13-27-18-10-9-15(22)12-17(18)21(2,3)4/h6-12H,5,13H2,1-4H3,(H,23,26)(H,24,25)	432.105	3-[[2-(4-bromo-2-tert-butyl-phenoxy)acetyl]amino]-N-ethyl-benzamide	17230786	C21H25BrN2O3	59.0128:[C2H3O2]-;205.073:[C11H9NO3+2H]-	2.2822770321035324	59.0128_188.8;205.073_113.5	11	2
9.513391801353375	0.1828	InChI=1S/C21H25BrN2O3/c1-5-23-20(26)14-7-6-8-16(11-14)24-19(25)13-27-18-10-9-15(12-17(18)22)21(2,3)4/h6-12H,5,13H2,1-4H3,(H,23,26)(H,24,25)	432.105	3-[[2-(2-bromo-4-tert-butyl-phenoxy)acetyl]amino]-N-ethyl-benzamide	17230769	C21H25BrN2O3	59.0128:[C2H3O2]-;205.073:[C11H9NO3+2H]-	2.2822770321035324	59.0128_188.8;205.073_113.5	11	2
13.344322062891369	0.1828	InChI=1S/C21H25BrN2O3/c1-4-26-19-12-20(27-5-2)17(22)11-16(19)21(25)23-18-8-6-7-14-13-24(3)10-9-15(14)18/h6-8,11-12H,4-5,9-10,13H2,1-3H3,(H,23,25)	432.105	5-bromo-2,4-diethoxy-N-(2-methyl-3,4-dihydro-1H-isoquinolin-5-yl)benzamide	9954541	C21H25BrN2O3	205.073:[C11H13NO3-H]-H-	2.007114076077563	205.073_113.5	11	1
11.349994875254652	0.1827	InChI=1S/C21H25BrN2O3/c1-14(2)27-19-10-6-17(7-11-19)21(26)23-13-20(25)24-15(3)12-16-4-8-18(22)9-5-16/h4-11,14-15H,12-13H2,1-3H3,(H,23,26)(H,24,25)/t15-/m1/s1	432.105	N-[2-[[(1R)-2-(4-bromophenyl)-1-methyl-ethyl]amino]-2-oxo-ethyl]-4-isopropoxy-benzamide	99518856	C21H25BrN2O3	205.073:[C11H12NO3]-H-	2.147457353334927	205.073_113.5	11	1
15.034148489591974	0.1827	InChI=1S/C21H25BrN2O3/c1-14-10-17(22)11-15(2)21(14)27-13-19(25)23-18-7-5-6-16(12-18)8-9-20(26)24(3)4/h5-7,10-12H,8-9,13H2,1-4H3,(H,23,25)	432.105	3-[3-[[2-(4-bromo-2,6-dimethyl-phenoxy)acetyl]amino]phenyl]-N,N-dimethyl-propanamide	37909263	C21H25BrN2O3	59.0128:[C2H3O2]-;205.073:[C11H11NO3]-	1.884559970217215	59.0128_188.8;205.073_113.5	11	2
9.513391801353375	0.1826	InChI=1S/C21H25BrN2O3/c1-5-15(4)23-21(26)17-8-6-7-9-18(17)24-19(25)12-27-16-10-13(2)20(22)14(3)11-16/h6-11,15H,5,12H2,1-4H3,(H,23,26)(H,24,25)/t15-/m0/s1	432.105	2-[[2-(4-bromo-3,5-dimethyl-phenoxy)acetyl]amino]-N-[(1S)-1-methylpropyl]benzamide	92455986	C21H25BrN2O3	59.0128:[C2H3O2]-;205.073:[C11H9NO3+2H]-	2.2780265762578646	59.0128_188.8;205.073_113.5	11	2
9.513391801353375	0.1826	InChI=1S/C21H25BrN2O3/c1-4-14(3)23-21(26)16-8-6-7-9-18(16)24-20(25)13-27-19-11-10-15(5-2)12-17(19)22/h6-12,14H,4-5,13H2,1-3H3,(H,23,26)(H,24,25)/t14-/m1/s1	432.105	2-[[2-(2-bromo-4-ethyl-phenoxy)acetyl]amino]-N-[(1R)-1-methylpropyl]benzamide	41609916	C21H25BrN2O3	59.0128:[C2H3O2]-;205.073:[C11H9NO3+2H]-	2.2780265762578646	59.0128_188.8;205.073_113.5	11	2
15.944715373474061	0.1822	InChI=1S/C21H25BrN2O3/c1-26-18-11-10-17(22)20(27-2)19(18)21(25)23-13-16-9-6-12-24(16)14-15-7-4-3-5-8-15/h3-5,7-8,10-11,16H,6,9,12-14H2,1-2H3,(H,23,25)	432.105	N-[(1-benzylpyrrolidin-2-yl)methyl]-3-bromo-2,6-dimethoxy-benzamide	21282686	C21H25BrN2O3	125.0244:[C6H7O3-H]-H-;205.073:[C11H12NO3]-H-	1.809827518811955	125.0244_187.2;205.073_113.5	11	2
11.532096610948697	0.1822	InChI=1S/C21H25BrN2O3/c1-4-27-20-17(22)12-16(13-19(20)26-3)21(25)24-11-10-23(2)14-18(24)15-8-6-5-7-9-15/h5-9,12-13,18H,4,10-11,14H2,1-3H3	432.105	(3-bromo-4-ethoxy-5-methoxy-phenyl)-(4-methyl-2-phenyl-piperazin-1-yl)methanone	55438126	C21H25BrN2O3	205.073:[C11H12NO3]-H-	2.1268311092905567	205.073_113.5	11	1
11.791846261535314	0.1818	InChI=1S/C21H25BrN2O3/c1-26-18-14-17(15-19(27-2)20(18)22)21(25)24-12-10-23(11-13-24)9-8-16-6-4-3-5-7-16/h3-7,14-15H,8-13H2,1-2H3	432.105	(4-bromo-3,5-dimethoxy-phenyl)-[4-(2-phenylethyl)piperazin-1-yl]methanone	41418929	C21H25BrN2O3	205.073:[C11H12NO3]-H-	2.1018980916190984	205.073_113.5	11	1
0.0	0.1815	InChI=1S/C20H15F3N4O4/c21-20(22,23)19-25-17(27-31-19)15-11-16(26-30-15)29-9-3-8-24-18(28)14-7-6-12-4-1-2-5-13(12)10-14/h1-2,4-7,10-11H,3,8-9H2,(H,24,28)	432.105	N-[3-[5-[5-(trifluoromethyl)-1,2,4-oxadiazol-3-yl]isoxazol-3-yl]oxypropyl]naphthalene-2-carboxamide	71556995	C20H15F3N4O4	NA	2.942214681587778	NA	11	0
10.737869164289771	0.1815	InChI=1S/C20H15F3N4O4/c1-27(19(28)30-11-15-9-24-8-14-6-7-29-16(14)15)10-12-2-4-13(5-3-12)17-25-18(31-26-17)20(21,22)23/h2-9H,10-11H2,1H3	432.105	furo[3,2-c]pyridin-7-ylmethyl N-methyl-N-[[4-[5-(trifluoromethyl)-1,2,4-oxadiazol-3-yl]phenyl]methyl]carbamate	89543329	C20H15F3N4O4	59.0128:[C2H2O2+H]-;205.073:[C11H11NO3]-	2.1722337551494246	59.0128_188.8;205.073_113.5	11	2
16.718369009403432	0.1814	InChI=1S/C22H19ClF2N2O3/c1-12-4-6-15(7-5-12)11-27-21(23)19(13(2)26-27)22(29)30-14(3)20(28)16-8-9-17(24)18(25)10-16/h4-10,14H,11H2,1-3H3	432.105	[2-(3,4-difluorophenyl)-1-methyl-2-oxo-ethyl] 5-chloro-3-methyl-1-(p-tolylmethyl)pyrazole-4-carboxylate	16570429	C22H19ClF2N2O3	101.0236:[C4H4O3+H]-;125.0244:[C6H5O3]-;205.073:[C11H10NO3+H]-	1.7425226753764214	101.0236_177.5;125.0244_187.2;205.073_113.5	11	3
12.397970203593378	0.1813	InChI=1S/C21H25BrN2O3/c1-24-12-10-20(11-13-24)27-19-6-2-16(3-7-19)14-23-21(25)15-26-18-8-4-17(22)5-9-18/h2-9,20H,10-15H2,1H3,(H,23,25)	432.105	2-(4-bromophenoxy)-N-[[4-[(1-methyl-4-piperidyl)oxy]phenyl]methyl]acetamide	99971718	C21H25BrN2O3	59.0128:[C2H3O2]-;205.073:[C11H12NO3]-H-	2.0496367723223017	59.0128_188.8;205.073_113.5	11	2
7.787364596307073	0.1812	InChI=1S/C20H15F3N4O4/c1-27-18(29-2)7-17(26-19(27)28)30-11-12-3-4-16(13(5-12)8-24)31-15-6-14(9-25-10-15)20(21,22)23/h3-7,9-10H,11H2,1-2H3	432.105	5-[(6-methoxy-1-methyl-2-oxo-pyrimidin-4-yl)oxymethyl]-2-[[5-(trifluoromethyl)-3-pyridyl]oxy]benzonitrile	121448358	C20H15F3N4O4	205.073:[C11H12NO3]-H-	2.3797643336117633	205.073_113.5	11	1
1.7739951790484207	0.1812	InChI=1S/C21H25BrN2O3/c1-25-18-5-3-17(4-6-18)24-8-2-7-23(9-10-24)15-16-13-20-21(14-19(16)22)27-12-11-26-20/h3-6,13-14H,2,7-12,15H2,1H3	432.105	1-[(6-bromo-2,3-dihydro-1,4-benzodioxin-7-yl)methyl]-4-(4-methoxyphenyl)-1,4-diazepane	55829444	C21H25BrN2O3	59.0128:[C2H4O2]-H-	2.811142142369535	59.0128_188.8	11	1
12.313806310061135	0.181	InChI=1S/C17H16N6O8/c18-15-21-11-6-3-9(7-12(11)22-15)20-14(25)17(28,29)16(26,27)13(24)19-8-1-4-10(5-2-8)23(30)31/h1-7,26-29H,(H,19,24)(H,20,25)(H3,18,21,22)	432.103	N-(2-amino-3H-benzimidazol-5-yl)-2,2,3,3-tetrahydroxy-N''-(4-nitrophenyl)butanediamide	68912704	C17H16N6O8	205.073:[C9H8N4O2+H]-	2.051603959609396	205.073_113.5	11	1
14.174280405070274	0.1807	InChI=1S/C21H25BrN2O3/c1-26-20-10-3-2-9-18(20)19(24-11-4-5-12-24)14-23-21(25)15-27-17-8-6-7-16(22)13-17/h2-3,6-10,13,19H,4-5,11-12,14-15H2,1H3,(H,23,25)	432.105	2-(3-bromophenoxy)-N-[2-(2-methoxyphenyl)-2-pyrrolidin-1-yl-ethyl]acetamide	112763570	C21H25BrN2O3	59.0128:[C2H3O2]-;205.073:[C11H13NO3-H]-H-	1.913738790680264	59.0128_188.8;205.073_113.5	11	2
14.174280405070274	0.1807	InChI=1S/C21H25BrN2O3/c1-26-20-7-3-2-6-18(20)19(24-12-4-5-13-24)14-23-21(25)15-27-17-10-8-16(22)9-11-17/h2-3,6-11,19H,4-5,12-15H2,1H3,(H,23,25)	432.105	2-(4-bromophenoxy)-N-[2-(2-methoxyphenyl)-2-pyrrolidin-1-yl-ethyl]acetamide	45746987	C21H25BrN2O3	59.0128:[C2H3O2]-;205.073:[C11H13NO3-H]-H-	1.913738790680264	59.0128_188.8;205.073_113.5	11	2
15.034148489591974	0.1806	InChI=1S/C21H25BrN2O3/c1-4-15-8-10-19(18(22)13-15)27-14-20(25)23-17-7-5-6-16(12-17)9-11-21(26)24(2)3/h5-8,10,12-13H,4,9,11,14H2,1-3H3,(H,23,25)	432.105	3-[3-[[2-(2-bromo-4-ethyl-phenoxy)acetyl]amino]phenyl]-N,N-dimethyl-propanamide	37909249	C21H25BrN2O3	59.0128:[C2H3O2]-;205.073:[C11H11NO3]-	1.8496850421416737	59.0128_188.8;205.073_113.5	11	2
16.438674718211992	0.1806	InChI=1S/C20H15F3N4O4/c1-28-15-8-5-12(9-16(15)29-2)17-14(10-24-26-17)19-25-18(27-31-19)11-3-6-13(7-4-11)30-20(21,22)23/h3-10H,1-2H3,(H,25,27)/b19-14-	432.105	(5Z)-5-[3-(3,4-dimethoxyphenyl)pyrazol-4-ylidene]-3-[4-(trifluoromethoxy)phenyl]-2H-1,2,4-oxadiazole	91624045	C20H15F3N4O4	191.0196:[C7H3F3NO2+H]-;205.073:[C9H7N4O2+2H]-	1.749314634732563	191.0196_169.7;205.073_113.5	11	2
11.349994875254652	0.1805	InChI=1S/C21H25BrN2O3/c1-5-27-16-9-7-15(8-10-16)20(25)24-19(13(2)3)21(26)23-18-11-6-14(4)12-17(18)22/h6-13,19H,5H2,1-4H3,(H,23,26)(H,24,25)/t19-/m1/s1	432.105	N-[(1R)-1-[(2-bromo-4-methyl-phenyl)carbamoyl]-2-methyl-propyl]-4-ethoxy-benzamide	41169396	C21H25BrN2O3	205.073:[C11H12NO3]-H-	2.11278791458004	205.073_113.5	11	1
13.494272761167883	0.1804	InChI=1S/C21H25BrN2O3/c1-5-27-20-9-7-6-8-17(20)19(23-15(3)25)13-21(26)24(4)16-10-11-18(22)14(2)12-16/h6-12,19H,5,13H2,1-4H3,(H,23,25)	432.105	3-acetamido-N-(4-bromo-3-methyl-phenyl)-3-(2-ethoxyphenyl)-N-methyl-propanamide	86963179	C21H25BrN2O3	205.073:[C11H11NO3]-	1.9574943438273473	205.073_113.5	11	1
13.494272761167883	0.1803	InChI=1S/C21H25BrN2O3/c1-3-24(4-2)21(26)16-10-12-18(13-11-16)23-20(25)9-6-14-27-19-8-5-7-17(22)15-19/h5,7-8,10-13,15H,3-4,6,9,14H2,1-2H3,(H,23,25)	432.105	4-[4-(3-bromophenoxy)butanoylamino]-N,N-diethyl-benzamide	34317200	C21H25BrN2O3	205.073:[C11H11NO3]-	1.9555268470816038	205.073_113.5	11	1
17.730479302090398	0.1802	InChI=1S/C18H20N6O3S2/c1-6-24-13-14(22(4)18(27)23(5)16(13)26)21-17(24)28-8-12(25)20-15-11(7-19)9(2)10(3)29-15/h6,8H2,1-5H3,(H,20,25)	432.104	N-(3-cyano-4,5-dimethyl-2-thienyl)-2-(7-ethyl-1,3-dimethyl-2,6-dioxo-purin-8-yl)sulfanyl-acetamide	43811593	C18H20N6O3S2	205.073:[C9H11N4O2-H]-H-	1.649206330486975	205.073_113.5	11	1
18.05220398840206	0.18	InChI=1S/C15H16ClF3N8O2/c16-9-11(21)24-10(20)8(23-9)13(28)25-12-7(5-22-14(29)26-12)27-3-1-6(2-4-27)15(17,18)19/h5-6H,1-4H2,(H4,20,21,24)(H2,22,25,26,28,29)	432.104	3,5-diamino-6-chloro-N-[2-oxo-5-[4-(trifluoromethyl)-1-piperidyl]-1H-pyrimidin-6-yl]pyrazine-2-carboxamide	88852823	C15H16ClF3N8O2	100.9666:[C3ClNO]-;125.0244:[C4H3N3O2]-;205.073:[C9H11N4O2-H]-H-	1.6232560226490944	100.9666_99.2;125.0244_187.2;205.073_113.5	11	3
18.05220398840206	0.18	InChI=1S/C15H16ClF3N8O2/c16-9-11(21)24-10(20)8(23-9)13(28)25-12-7(4-22-14(29)26-12)27-3-1-2-6(5-27)15(17,18)19/h4,6H,1-3,5H2,(H4,20,21,24)(H2,22,25,26,28,29)	432.104	3,5-diamino-6-chloro-N-[2-oxo-5-[3-(trifluoromethyl)-1-piperidyl]-1H-pyrimidin-6-yl]pyrazine-2-carboxamide	88852539	C15H16ClF3N8O2	100.9666:[C3ClNO]-;125.0244:[C4H3N3O2]-;205.073:[C9H11N4O2-H]-H-	1.6232560226490944	100.9666_99.2;125.0244_187.2;205.073_113.5	11	3
10.867007289493323	0.1799	InChI=1S/C19H20ClF3N2O4/c1-29-17(27)16-12(10-2-4-14(20)13(8-10)19(21,22)23)9-11-3-5-15(16)25(11)18(28)24-6-7-26/h2,4,8,11,15,26H,3,5-7,9H2,1H3,(H,24,28)	432.106	methyl 3-[4-chloro-3-(trifluoromethyl)phenyl]-8-(2-hydroxyethylcarbamoyl)-8-azabicyclo[3.2.1]oct-3-ene-4-carboxylate	73756906	C19H20ClF3N2O4	59.0128:[C2H3O2]-;205.073:[C11H12NO3]-H-	2.1382143555802227	59.0128_188.8;205.073_113.5	11	2
11.349994875254652	0.1798	InChI=1S/C21H25BrN2O3/c1-3-4-13-27-17-11-9-16(10-12-17)21(26)23-14-20(25)24-15(2)18-7-5-6-8-19(18)22/h5-12,15H,3-4,13-14H2,1-2H3,(H,23,26)(H,24,25)	432.105	N-[2-[1-(2-bromophenyl)ethylamino]-2-oxo-ethyl]-4-butoxy-benzamide	60421370	C21H25BrN2O3	205.073:[C11H12NO3]-H-	2.1016374242920173	205.073_113.5	11	1
11.349994875254652	0.1798	InChI=1S/C21H25BrN2O3/c1-3-4-13-27-19-11-7-17(8-12-19)21(26)23-14-20(25)24-15(2)16-5-9-18(22)10-6-16/h5-12,15H,3-4,13-14H2,1-2H3,(H,23,26)(H,24,25)	432.105	N-[2-[1-(4-bromophenyl)ethylamino]-2-oxo-ethyl]-4-butoxy-benzamide	55350141	C21H25BrN2O3	205.073:[C11H12NO3]-H-	2.1016374242920173	205.073_113.5	11	1
9.712503749840335	0.1798	InChI=1S/C21H25BrN2O3/c1-3-12-6-8-23-9-7-15-14-5-4-13(22)10-17(14)24-19(15)18(23)16(12)11-21(24,26)20(25)27-2/h4-5,10,12,16,18,26H,3,6-9,11H2,1-2H3/t12-,16?,18-,21-/m0/s1	432.105	NA	23724812	C21H25BrN2O3	59.0128:[C2H3O2]-;89.0232:[C3H4O3+H]-;101.0236:[C4H6O3]-H-	2.2180906806905654	59.0128_188.8;89.0232_90.6;101.0236_177.5	11	3
0.0	0.1796	InChI=1S/C25H20O5S/c1-29-20-12-8-18(9-13-20)23-16-22(17-6-4-3-5-7-17)24(25(26)30-23)19-10-14-21(15-11-19)31(2,27)28/h3-16H,1-2H3	432.103	6-(4-methoxyphenyl)-3-(4-methylsulfonylphenyl)-4-phenyl-pyran-2-one	10071460	C25H20O5S	NA	2.912757663817489	NA	11	0
0.0	0.1796	InChI=1S/C25H20O5S/c1-29-20-12-8-18(9-13-20)23-16-22(17-10-14-21(15-11-17)31(2,27)28)24(25(26)30-23)19-6-4-3-5-7-19/h3-16H,1-2H3	432.103	6-(4-methoxyphenyl)-4-(4-methylsulfonylphenyl)-3-phenyl-pyran-2-one	11441846	C25H20O5S	NA	2.912757663817489	NA	11	0
9.513391801353375	0.1795	InChI=1S/C21H25BrN2O3/c1-5-14-9-10-18(17(22)11-14)27-13-19(25)23-16-8-6-7-15(12-16)20(26)24-21(2,3)4/h6-12H,5,13H2,1-4H3,(H,23,25)(H,24,26)	432.105	3-[[2-(2-bromo-4-ethyl-phenoxy)acetyl]amino]-N-tert-butyl-benzamide	28639416	C21H25BrN2O3	59.0128:[C2H3O2]-;205.073:[C11H9NO3+2H]-	2.228357504343055	59.0128_188.8;205.073_113.5	11	2
11.532096610948697	0.1793	InChI=1S/C21H25BrN2O3/c1-4-27-20-17(22)13-16(14-19(20)26-3)21(25)24-11-9-23(10-12-24)18-8-6-5-7-15(18)2/h5-8,13-14H,4,9-12H2,1-3H3	432.105	(3-bromo-4-ethoxy-5-methoxy-phenyl)-[4-(o-tolyl)piperazin-1-yl]methanone	112766271	C21H25BrN2O3	205.073:[C11H12NO3]-H-	2.08056502702063	205.073_113.5	11	1
9.513391801353375	0.1793	InChI=1S/C21H25BrN2O3/c1-4-10-23-21(26)15-6-5-7-17(11-15)24-20(25)13-27-19-9-8-16(22)12-18(19)14(2)3/h5-9,11-12,14H,4,10,13H2,1-3H3,(H,23,26)(H,24,25)	432.105	3-[[2-(4-bromo-2-isopropyl-phenoxy)acetyl]amino]-N-propyl-benzamide	17222787	C21H25BrN2O3	59.0128:[C2H3O2]-;205.073:[C11H9NO3+2H]-	2.2251841151610754	59.0128_188.8;205.073_113.5	11	2
7.979041277801979	0.1793	InChI=1S/C21H25BrN2O3/c1-3-26-19-12-15(16(22)14-20(19)27-4-2)13-21(25)24-11-7-9-18(24)17-8-5-6-10-23-17/h5-6,8,10,12,14,18H,3-4,7,9,11,13H2,1-2H3	432.105	2-(2-bromo-4,5-diethoxy-phenyl)-1-[2-(2-pyridyl)pyrrolidin-1-yl]ethanone	56041768	C21H25BrN2O3	205.073:[C11H14NO3-2H]-H-	2.3354082145036976	205.073_113.5	11	1
11.349994875254652	0.1791	InChI=1S/C21H25BrN2O3/c1-14(2)13-27-18-6-4-5-16(11-18)21(26)23-10-9-20(25)24-19-12-17(22)8-7-15(19)3/h4-8,11-12,14H,9-10,13H2,1-3H3,(H,23,26)(H,24,25)	432.105	N-[3-(5-bromo-2-methyl-anilino)-3-oxo-propyl]-3-isobutoxy-benzamide	56266514	C21H25BrN2O3	205.073:[C11H12NO3]-H-	2.089903849505355	205.073_113.5	11	1
9.513391801353375	0.1791	InChI=1S/C21H25BrN2O3/c1-3-5-12-23-21(26)16-8-6-7-9-18(16)24-20(25)14-27-19-11-10-15(4-2)13-17(19)22/h6-11,13H,3-5,12,14H2,1-2H3,(H,23,26)(H,24,25)	432.105	2-[[2-(2-bromo-4-ethyl-phenoxy)acetyl]amino]-N-butyl-benzamide	17149352	C21H25BrN2O3	59.0128:[C2H3O2]-;205.073:[C11H9NO3+2H]-	2.2220874546506537	59.0128_188.8;205.073_113.5	11	2
11.791846261535314	0.1789	InChI=1S/C21H25BrN2O3/c1-26-17-14-18(20(27-2)19(22)15-17)21(25)24-12-10-23(11-13-24)9-8-16-6-4-3-5-7-16/h3-7,14-15H,8-13H2,1-2H3	432.105	(3-bromo-2,5-dimethoxy-phenyl)-[4-(2-phenylethyl)piperazin-1-yl]methanone	30291282	C21H25BrN2O3	205.073:[C11H12NO3]-H-	2.055396462190937	205.073_113.5	11	1
11.28398818404188	0.1788	InChI=1S/C21H25BrN2O3/c1-21(2,3)14-10-11-18(16(22)13-14)27-12-6-9-19(25)24-17-8-5-4-7-15(17)20(23)26/h4-5,7-8,10-11,13H,6,9,12H2,1-3H3,(H2,23,26)(H,24,25)	432.105	2-[4-(2-bromo-4-tert-butyl-phenoxy)butanoylamino]benzamide	19201896	C21H25BrN2O3	205.073:[C11H12NO3]-H-	2.0898248336663214	205.073_113.5	11	1
8.85949652719989	0.1786	InChI=1S/C22H19ClF2N2O3/c23-18-11-16(6-7-19(18)25)29-13-21(28)27-8-2-5-20(27)22-26-12-17(30-22)10-14-3-1-4-15(24)9-14/h1,3-4,6-7,9,11-12,20H,2,5,8,10,13H2	432.105	2-(3-chloro-4-fluoro-phenoxy)-1-[2-[5-[(3-fluorophenyl)methyl]oxazol-2-yl]pyrrolidin-1-yl]ethanone	110119788	C22H19ClF2N2O3	59.0128:[C2H2O2+H]-;205.073:[C11H12NO3]-H-	2.260800071596389	59.0128_188.8;205.073_113.5	11	2
15.218433827923487	0.1785	InChI=1S/C21H25BrN2O3/c1-14-11-17(22)12-15(2)21(14)27-13-19(25)23-18-8-5-16(6-9-18)7-10-20(26)24(3)4/h5-6,8-9,11-12H,7,10,13H2,1-4H3,(H,23,25)	432.105	3-[4-[[2-(4-bromo-2,6-dimethyl-phenoxy)acetyl]amino]phenyl]-N,N-dimethyl-propanamide	46760390	C21H25BrN2O3	59.0128:[C2H2O2+H]-;205.073:[C11H11NO3]-	1.8017267921561115	59.0128_188.8;205.073_113.5	11	2
11.349994875254652	0.1785	InChI=1S/C21H25BrN2O3/c1-3-4-12-23-21(27)20(16-6-5-7-18(25)14-16)24(2)19(26)13-15-8-10-17(22)11-9-15/h5-11,14,20,25H,3-4,12-13H2,1-2H3,(H,23,27)/t20-/m1/s1	432.105	(2R)-2-[[2-(4-bromophenyl)acetyl]-methyl-amino]-N-butyl-2-(3-hydroxyphenyl)acetamide	51772254	C21H25BrN2O3	205.073:[C11H12NO3]-H-	2.08068211452148	205.073_113.5	11	1
11.349994875254652	0.1785	InChI=1S/C21H25BrN2O3/c1-3-4-13-23-21(27)20(16-7-11-18(25)12-8-16)24(2)19(26)14-15-5-9-17(22)10-6-15/h5-12,20,25H,3-4,13-14H2,1-2H3,(H,23,27)/t20-/m0/s1	432.105	(2S)-2-[[2-(4-bromophenyl)acetyl]-methyl-amino]-N-butyl-2-(4-hydroxyphenyl)acetamide	51772263	C21H25BrN2O3	205.073:[C11H12NO3]-H-	2.08068211452148	205.073_113.5	11	1
13.344322062891369	0.1784	InChI=1S/C21H25BrN2O3/c1-13(2)27-20-11-19(26-4)16(10-17(20)22)21(25)23-18-7-5-6-14-12-24(3)9-8-15(14)18/h5-7,10-11,13H,8-9,12H2,1-4H3,(H,23,25)	432.105	5-bromo-4-isopropoxy-2-methoxy-N-(2-methyl-3,4-dihydro-1H-isoquinolin-5-yl)benzamide	18687385	C21H25BrN2O3	205.073:[C11H13NO3-H]-H-	1.9345612238721155	205.073_113.5	11	1
11.791846261535314	0.1783	InChI=1S/C21H25BrN2O3/c1-4-11-27-20-17(22)12-16(13-19(20)26-3)21(25)24-10-9-23(2)18-8-6-5-7-15(18)14-24/h5-8,12-13H,4,9-11,14H2,1-3H3	432.105	(3-bromo-5-methoxy-4-propoxy-phenyl)-(1-methyl-3,5-dihydro-2H-1,4-benzodiazepin-4-yl)methanone	56469905	C21H25BrN2O3	205.073:[C11H12NO3]-H-	2.044852059982794	205.073_113.5	11	1
11.791846261535314	0.1782	InChI=1S/C21H25BrN2O3/c1-14-6-5-7-17(15(14)2)23-8-10-24(11-9-23)21(25)16-12-18(26-3)20(22)19(13-16)27-4/h5-7,12-13H,8-11H2,1-4H3	432.105	(4-bromo-3,5-dimethoxy-phenyl)-[4-(2,3-dimethylphenyl)piperazin-1-yl]methanone	26692796	C21H25BrN2O3	205.073:[C11H12NO3]-H-	2.0429442894603445	205.073_113.5	11	1
9.674282974925505	0.178	InChI=1S/C21H25BrN2O3/c1-13-14(2)27-20(16(13)12-23)24-19(25)7-6-10-26-18-9-8-15(11-17(18)22)21(3,4)5/h8-9,11H,6-7,10H2,1-5H3,(H,24,25)	432.105	4-(2-bromo-4-tert-butyl-phenoxy)-N-(3-cyano-4,5-dimethyl-2-furyl)butanamide	108762855	C21H25BrN2O3	205.073:[C11H13NO3-H]-H-	2.191721121936764	205.073_113.5	11	1
12.96577651281674	0.1778	InChI=1S/C21H25BrN2O3/c1-4-27-20-17(22)11-16(12-19(20)26-3)21(25)23-13-14(2)24-10-9-15-7-5-6-8-18(15)24/h5-8,11-12,14H,4,9-10,13H2,1-3H3,(H,23,25)	432.105	3-bromo-4-ethoxy-N-(2-indolin-1-ylpropyl)-5-methoxy-benzamide	112819643	C21H25BrN2O3	205.073:[C11H13NO3-H]-H-	1.9520461263309827	205.073_113.5	11	1
9.481727961071005	0.1772	InChI=1S/C21H25BrN2O3/c1-15(16-8-10-18(22)11-9-16)23-21(26)24(14-19-6-4-12-27-19)13-17-5-2-3-7-20(17)25/h2-3,5,7-11,15,19,25H,4,6,12-14H2,1H3,(H,23,26)/t15-,19-/m1/s1	432.105	3-[(1R)-1-(4-bromophenyl)ethyl]-1-[(2-hydroxyphenyl)methyl]-1-[[(2R)-tetrahydrofuran-2-yl]methyl]urea	98822424	C21H25BrN2O3	205.073:[C11H13NO3-H]-H-	2.193130364819055	205.073_113.5	11	1
9.620858537544315	0.1771	InChI=1S/C21H25BrN2O3/c1-14(15-4-6-18(22)7-5-15)23-21(25)13-24-9-8-16-10-19(26-2)20(27-3)11-17(16)12-24/h4-7,10-11,14H,8-9,12-13H2,1-3H3,(H,23,25)	432.105	N-[1-(4-bromophenyl)ethyl]-2-(6,7-dimethoxy-3,4-dihydro-1H-isoquinolin-2-yl)acetamide	60468129	C21H25BrN2O3	205.073:[C11H13NO3-H]-H-	2.1817472147019092	205.073_113.5	11	1
13.344322062891369	0.1771	InChI=1S/C21H25BrN2O3/c1-3-12-27-20-18(22)13-15(14-19(20)26-2)21(25)23-16-6-8-17(9-7-16)24-10-4-5-11-24/h6-9,13-14H,3-5,10-12H2,1-2H3,(H,23,25)	432.105	3-bromo-5-methoxy-4-propoxy-N-(4-pyrrolidin-1-ylphenyl)benzamide	16231988	C21H25BrN2O3	205.073:[C11H13NO3-H]-H-	1.914460492803621	205.073_113.5	11	1
11.366686141832925	0.1769	InChI=1S/C21H25BrN2O3/c1-4-23(5-2)13-14-24-18-8-6-7-17(22)19(18)21(26,20(24)25)15-9-11-16(27-3)12-10-15/h6-12,26H,4-5,13-14H2,1-3H3	432.105	4-bromo-1-[2-(diethylamino)ethyl]-3-hydroxy-3-(4-methoxyphenyl)indolin-2-one	18518610	C21H25BrN2O3	205.073:[C11H12NO3]-H-	2.053716114393545	205.073_113.5	11	1
10.210494239324682	0.1769	InChI=1S/C21H25BrN2O3/c1-15(2)16-5-7-17(8-6-16)26-14-20(25)24-12-9-18(10-13-24)27-21-19(22)4-3-11-23-21/h3-8,11,15,18H,9-10,12-14H2,1-2H3	432.105	1-[4-[(3-bromo-2-pyridyl)oxy]-1-piperidyl]-2-(4-isopropylphenoxy)ethanone	71799470	C21H25BrN2O3	59.0128:[C2H2O2+H]-;205.073:[C11H14NO3-2H]-H-	2.1365448009043555	59.0128_188.8;205.073_113.5	11	2
11.532096610948697	0.1768	InChI=1S/C21H25BrN2O3/c1-26-19-11-17(18(22)12-20(19)27-2)21(25)24-8-6-15(7-9-24)16-5-3-4-14(10-16)13-23/h3-5,10-12,15H,6-9,13,23H2,1-2H3	432.105	[4-[3-(aminomethyl)phenyl]-1-piperidyl]-(2-bromo-4,5-dimethoxy-phenyl)methanone	23587311	C21H25BrN2O3	205.073:[C11H12NO3]-H-	2.0400362752149634	205.073_113.5	11	1
12.400708986127249	0.1766	InChI=1S/C21H25BrN2O3/c1-26-18-6-7-19(20(13-18)27-2)23-21(25)16-8-10-24(11-9-16)14-15-4-3-5-17(22)12-15/h3-7,12-13,16H,8-11,14H2,1-2H3,(H,23,25)	432.105	1-[(3-bromophenyl)methyl]-N-(2,4-dimethoxyphenyl)piperidine-4-carboxamide	43919973	C21H25BrN2O3	205.073:[C11H13NO3-H]-H-	1.9740409600102844	205.073_113.5	11	1
10.28020812121626	0.1766	InChI=1S/C23H17FN4O2S/c1-15(16-8-9-21-22(11-16)30-14-29-21)27-28-20(18-6-2-3-7-19(18)24)13-31-23(28)26-17-5-4-10-25-12-17/h2-13H,14H2,1H3	432.106	3-[1-(1,3-benzodioxol-5-yl)ethylideneamino]-4-(2-fluorophenyl)-N-(3-pyridyl)thiazol-2-imine	23737865	C23H17FN4O2S	59.0128:[C2H2O2+H]-;191.0196:[C10H5FNS+H]-	2.126671766552201	59.0128_188.8;191.0196_169.7	11	2
12.400708986127249	0.1766	InChI=1S/C21H25BrN2O3/c1-26-18-7-8-19(20(13-18)27-2)23-21(25)16-9-11-24(12-10-16)14-15-3-5-17(22)6-4-15/h3-8,13,16H,9-12,14H2,1-2H3,(H,23,25)	432.105	1-[(4-bromophenyl)methyl]-N-(2,4-dimethoxyphenyl)piperidine-4-carboxamide	43919974	C21H25BrN2O3	205.073:[C11H13NO3-H]-H-	1.9740409600102844	205.073_113.5	11	1
12.400708986127249	0.1766	InChI=1S/C21H25BrN2O3/c1-26-19-8-7-18(13-20(19)27-2)23-21(25)16-9-11-24(12-10-16)14-15-3-5-17(22)6-4-15/h3-8,13,16H,9-12,14H2,1-2H3,(H,23,25)	432.105	1-[(4-bromophenyl)methyl]-N-(3,4-dimethoxyphenyl)piperidine-4-carboxamide	43920180	C21H25BrN2O3	205.073:[C11H13NO3-H]-H-	1.9736402608945718	205.073_113.5	11	1
12.400708986127249	0.1766	InChI=1S/C21H25BrN2O3/c1-26-19-7-6-18(13-20(19)27-2)23-21(25)16-8-10-24(11-9-16)14-15-4-3-5-17(22)12-15/h3-7,12-13,16H,8-11,14H2,1-2H3,(H,23,25)	432.105	1-[(3-bromophenyl)methyl]-N-(3,4-dimethoxyphenyl)piperidine-4-carboxamide	43920179	C21H25BrN2O3	205.073:[C11H13NO3-H]-H-	1.9736402608945718	205.073_113.5	11	1
15.218433827923487	0.1765	InChI=1S/C21H25BrN2O3/c1-4-15-7-11-19(18(22)13-15)27-14-20(25)23-17-9-5-16(6-10-17)8-12-21(26)24(2)3/h5-7,9-11,13H,4,8,12,14H2,1-3H3,(H,23,25)	432.105	3-[4-[[2-(2-bromo-4-ethyl-phenoxy)acetyl]amino]phenyl]-N,N-dimethyl-propanamide	46760386	C21H25BrN2O3	59.0128:[C2H2O2+H]-;205.073:[C11H11NO3]-	1.770134804619147	59.0128_188.8;205.073_113.5	11	2
9.508467532411817	0.1765	InChI=1S/C21H25BrN2O3/c1-3-19-7-4-9-24-10-8-20(17(19)24)14-6-5-13(22)11-15(14)23-16(20)21(26,12-19)18(25)27-2/h5-6,11,17,26H,3-4,7-10,12H2,1-2H3/t17-,19-,20-,21?/m0/s1	432.105	NA	11729733	C21H25BrN2O3	59.0128:[C2H3O2]-;89.0232:[C3H4O3+H]-;101.0236:[C4H6O3]-H-	2.1799847852163907	59.0128_188.8;89.0232_90.6;101.0236_177.5	11	3
11.791846261535314	0.1765	InChI=1S/C21H25BrN2O3/c1-15-6-4-5-7-16(15)14-23-8-10-24(11-9-23)21(25)17-12-18(26-2)20(22)19(13-17)27-3/h4-7,12-13H,8-11,14H2,1-3H3	432.105	(4-bromo-3,5-dimethoxy-phenyl)-[4-(o-tolylmethyl)piperazin-1-yl]methanone	27841153	C21H25BrN2O3	205.073:[C11H12NO3]-H-	2.015225974638575	205.073_113.5	11	1
11.791846261535314	0.1764	InChI=1S/C21H25BrN2O3/c1-15-5-4-6-16(11-15)14-23-7-9-24(10-8-23)21(25)17-12-18(26-2)20(22)19(13-17)27-3/h4-6,11-13H,7-10,14H2,1-3H3	432.105	(4-bromo-3,5-dimethoxy-phenyl)-[4-(m-tolylmethyl)piperazin-1-yl]methanone	37321378	C21H25BrN2O3	205.073:[C11H12NO3]-H-	2.0151077122591574	205.073_113.5	11	1
4.326454944790403	0.1763	InChI=1S/C25H20O5S/c1-29-21-11-7-6-10-19(21)16-22-23(18-12-14-20(15-13-18)31(2,27)28)24(25(26)30-22)17-8-4-3-5-9-17/h3-16H,1-2H3/b22-16-	432.103	(5Z)-5-[(2-methoxyphenyl)methylene]-4-(4-methylsulfonylphenyl)-3-phenyl-furan-2-one	71740090	C25H20O5S	125.0244:[C6H4O3+H]-	2.548089267904412	125.0244_187.2	11	1
0.0	0.1762	InChI=1S/C20H15F3N4O4/c21-8-1-2-14(12(22)3-8)27-7-15(31-20(29)30)17(28)9-4-13(23)19(25-18(9)27)26-5-10-11(6-26)16(10)24/h1-4,7,10-11,16H,5-6,24H2,(H,29,30)/t10-,11+,16?	432.105	[7-[(1R,5S)-6-amino-3-azabicyclo[3.1.0]hexan-3-yl]-1-(2,4-difluorophenyl)-6-fluoro-4-oxo-1,8-naphthyridin-3-yl] hydrogen carbonate	69349892	C20H15F3N4O4	NA	2.8570795654769356	NA	11	0
9.513391801353375	0.1762	InChI=1S/C21H25BrN2O3/c1-4-5-10-23-21(26)17-8-6-7-9-18(17)24-19(25)13-27-16-11-14(2)20(22)15(3)12-16/h6-9,11-12H,4-5,10,13H2,1-3H3,(H,23,26)(H,24,25)	432.105	2-[[2-(4-bromo-3,5-dimethyl-phenoxy)acetyl]amino]-N-butyl-benzamide	17649145	C21H25BrN2O3	59.0128:[C2H3O2]-;205.073:[C11H9NO3+2H]-	2.173768038280157	59.0128_188.8;205.073_113.5	11	2
9.513391801353375	0.1761	InChI=1S/C21H25BrN2O3/c1-4-14(3)15-10-11-19(17(22)12-15)27-13-20(25)24-18-9-7-6-8-16(18)21(26)23-5-2/h6-12,14H,4-5,13H2,1-3H3,(H,23,26)(H,24,25)	432.105	2-[[2-(2-bromo-4-sec-butyl-phenoxy)acetyl]amino]-N-ethyl-benzamide	17189578	C21H25BrN2O3	59.0128:[C2H3O2]-;205.073:[C11H9NO3+2H]-	2.1736191907797666	59.0128_188.8;205.073_113.5	11	2
9.513391801353375	0.1761	InChI=1S/C21H25BrN2O3/c1-5-23-20(26)15-8-6-7-9-17(15)24-19(25)13-27-18-11-10-14(12-16(18)22)21(2,3)4/h6-12H,5,13H2,1-4H3,(H,23,26)(H,24,25)	432.105	2-[[2-(2-bromo-4-tert-butyl-phenoxy)acetyl]amino]-N-ethyl-benzamide	17350181	C21H25BrN2O3	59.0128:[C2H3O2]-;205.073:[C11H9NO3+2H]-	2.1728728887580706	59.0128_188.8;205.073_113.5	11	2
9.513391801353375	0.1761	InChI=1S/C21H25BrN2O3/c1-5-23-20(26)15-8-6-7-9-17(15)24-19(25)13-27-18-11-10-14(22)12-16(18)21(2,3)4/h6-12H,5,13H2,1-4H3,(H,23,26)(H,24,25)	432.105	2-[[2-(4-bromo-2-tert-butyl-phenoxy)acetyl]amino]-N-ethyl-benzamide	17051657	C21H25BrN2O3	59.0128:[C2H3O2]-;205.073:[C11H9NO3+2H]-	2.1728728887580706	59.0128_188.8;205.073_113.5	11	2
9.513391801353375	0.1761	InChI=1S/C21H25BrN2O3/c1-13-10-15(11-14(2)19(13)22)27-12-18(25)23-17-9-7-6-8-16(17)20(26)24-21(3,4)5/h6-11H,12H2,1-5H3,(H,23,25)(H,24,26)	432.105	2-[[2-(4-bromo-3,5-dimethyl-phenoxy)acetyl]amino]-N-tert-butyl-benzamide	17649151	C21H25BrN2O3	59.0128:[C2H3O2]-;205.073:[C11H9NO3+2H]-	2.173720840045934	59.0128_188.8;205.073_113.5	11	2
9.513391801353375	0.1761	InChI=1S/C21H25BrN2O3/c1-13(2)17-11-15(22)9-10-19(17)27-12-20(25)24-18-8-6-5-7-16(18)21(26)23-14(3)4/h5-11,13-14H,12H2,1-4H3,(H,23,26)(H,24,25)	432.105	2-[[2-(4-bromo-2-isopropyl-phenoxy)acetyl]amino]-N-isopropyl-benzamide	17188944	C21H25BrN2O3	59.0128:[C2H3O2]-;205.073:[C11H9NO3+2H]-	2.173720840045934	59.0128_188.8;205.073_113.5	11	2
9.513391801353375	0.1761	InChI=1S/C21H25BrN2O3/c1-13(2)15-9-10-19(17(22)11-15)27-12-20(25)24-18-8-6-5-7-16(18)21(26)23-14(3)4/h5-11,13-14H,12H2,1-4H3,(H,23,26)(H,24,25)	432.105	2-[[2-(2-bromo-4-isopropyl-phenoxy)acetyl]amino]-N-isopropyl-benzamide	17649159	C21H25BrN2O3	59.0128:[C2H3O2]-;205.073:[C11H9NO3+2H]-	2.173720840045934	59.0128_188.8;205.073_113.5	11	2
9.513391801353375	0.1761	InChI=1S/C21H25BrN2O3/c1-13(2)11-23-21(26)17-7-5-6-8-18(17)24-19(25)12-27-16-9-14(3)20(22)15(4)10-16/h5-10,13H,11-12H2,1-4H3,(H,23,26)(H,24,25)	432.105	2-[[2-(4-bromo-3,5-dimethyl-phenoxy)acetyl]amino]-N-isobutyl-benzamide	17649138	C21H25BrN2O3	59.0128:[C2H3O2]-;205.073:[C11H9NO3+2H]-	2.173468308726042	59.0128_188.8;205.073_113.5	11	2
1.5398757284240907	0.1758	InChI=1S/C21H25BrN2O3/c22-20-17-9-5-4-6-15(17)10-11-18(20)27-14-19(25)23-12-13-24-21(26)16-7-2-1-3-8-16/h4-6,9-11,16H,1-3,7-8,12-14H2,(H,23,25)(H,24,26)	432.105	N-[2-[[2-[(1-bromo-2-naphthyl)oxy]acetyl]amino]ethyl]cyclohexanecarboxamide	55805837	C21H25BrN2O3	59.0128:[C2H3O2]-	2.7397594356214743	59.0128_188.8	11	1
1.5398757284240907	0.1758	InChI=1S/C21H25BrN2O3/c22-18-8-6-17-13-19(9-7-16(17)12-18)27-14-20(25)23-10-11-24-21(26)15-4-2-1-3-5-15/h6-9,12-13,15H,1-5,10-11,14H2,(H,23,25)(H,24,26)	432.105	N-[2-[[2-[(6-bromo-2-naphthyl)oxy]acetyl]amino]ethyl]cyclohexanecarboxamide	55806060	C21H25BrN2O3	59.0128:[C2H3O2]-	2.7397594356214743	59.0128_188.8	11	1
11.349994875254652	0.1758	InChI=1S/C21H25BrN2O3/c1-3-4-13-23-21(27)20(17-7-5-6-8-18(17)25)24(2)19(26)14-15-9-11-16(22)12-10-15/h5-12,20,25H,3-4,13-14H2,1-2H3,(H,23,27)/t20-/m0/s1	432.105	(2S)-2-[[2-(4-bromophenyl)acetyl]-methyl-amino]-N-butyl-2-(2-hydroxyphenyl)acetamide	51772317	C21H25BrN2O3	205.073:[C11H12NO3]-H-	2.036163111467995	205.073_113.5	11	1
12.728640444810692	0.1757	InChI=1S/C21H25BrN2O3/c1-26-19-9-8-18(12-20(19)27-2)23-21(25)16-6-4-10-24(14-16)13-15-5-3-7-17(22)11-15/h3,5,7-9,11-12,16H,4,6,10,13-14H2,1-2H3,(H,23,25)	432.105	1-[(3-bromophenyl)methyl]-N-(3,4-dimethoxyphenyl)piperidine-3-carboxamide	43920171	C21H25BrN2O3	205.073:[C11H13NO3-H]-H-	1.9352793124391512	205.073_113.5	11	1
12.728640444810692	0.1757	InChI=1S/C21H25BrN2O3/c1-26-19-10-9-18(12-20(19)27-2)23-21(25)16-4-3-11-24(14-16)13-15-5-7-17(22)8-6-15/h5-10,12,16H,3-4,11,13-14H2,1-2H3,(H,23,25)	432.105	1-[(4-bromophenyl)methyl]-N-(3,4-dimethoxyphenyl)piperidine-3-carboxamide	43920172	C21H25BrN2O3	205.073:[C11H13NO3-H]-H-	1.9352793124391512	205.073_113.5	11	1
0.0	0.1752	InChI=1S/C22H19ClF2N2O3/c1-3-5-17-20(12-6-8-13(23)9-7-12)27-22(30-17)15(4-2)29-16-11-10-14(24)18(19(16)25)21(26)28/h3,6-11,15H,1,4-5H2,2H3,(H2,26,28)	432.105	3-[1-[5-allyl-4-(4-chlorophenyl)oxazol-2-yl]propoxy]-2,6-difluoro-benzamide	66574451	C22H19ClF2N2O3	NA	2.8407642469905956	NA	11	0
9.888569749476297	0.1751	InChI=1S/C21H25BrN2O3/c1-21(2,3)15-7-10-18(17(22)12-15)27-13-20(26)24-16-8-5-14(6-9-16)11-19(25)23-4/h5-10,12H,11,13H2,1-4H3,(H,23,25)(H,24,26)	432.105	2-[4-[[2-(2-bromo-4-tert-butyl-phenoxy)acetyl]amino]phenyl]-N-methyl-acetamide	37980075	C21H25BrN2O3	59.0128:[C2H2O2+H]-;205.073:[C11H10NO3+H]-	2.1292773611148923	59.0128_188.8;205.073_113.5	11	2
9.888569749476297	0.1751	InChI=1S/C21H25BrN2O3/c1-21(2,3)17-12-15(22)7-10-18(17)27-13-20(26)24-16-8-5-14(6-9-16)11-19(25)23-4/h5-10,12H,11,13H2,1-4H3,(H,23,25)(H,24,26)	432.105	2-[4-[[2-(4-bromo-2-tert-butyl-phenoxy)acetyl]amino]phenyl]-N-methyl-acetamide	37980103	C21H25BrN2O3	59.0128:[C2H2O2+H]-;205.073:[C11H10NO3+H]-	2.1292773611148923	59.0128_188.8;205.073_113.5	11	2
1.7880640744516691	0.175	InChI=1S/C21H25BrN2O3/c1-16(25)17-2-6-19(7-3-17)24-12-10-23(11-13-24)14-20(26)15-27-21-8-4-18(22)5-9-21/h2-9,20,26H,10-15H2,1H3/t20-/m0/s1	432.105	1-[4-[4-[(2S)-3-(4-bromophenoxy)-2-hydroxy-propyl]piperazin-1-yl]phenyl]ethanone	92537035	C21H25BrN2O3	59.0128:[C2H4O2]-H-	2.709209311871652	59.0128_188.8	11	1
13.580845752253456	0.1742	InChI=1S/C18H20N6O3S2/c1-22(7-9-25)16-20-14-13(15(26)21-17(27)23(14)2)24(16)8-10-28-18-19-11-5-3-4-6-12(11)29-18/h3-6,25H,7-10H2,1-2H3,(H,21,26,27)	432.104	7-[2-(1,3-benzothiazol-2-ylsulfanyl)ethyl]-8-[2-hydroxyethyl(methyl)amino]-3-methyl-purine-2,6-dione	3738951	C18H20N6O3S2	125.0244:[C4H4N3O2]-H-;205.073:[C9H11N4O2-H]-H-	1.8506830146607816	125.0244_187.2;205.073_113.5	11	2
12.999581894453131	0.1741	InChI=1S/C21H25BrN2O3/c1-2-3-4-14-26-17-9-7-16(8-10-17)21(25)24-13-11-18(15-24)27-20-19(22)6-5-12-23-20/h5-10,12,18H,2-4,11,13-15H2,1H3	432.105	[3-[(3-bromo-2-pyridyl)oxy]pyrrolidin-1-yl]-(4-pentoxyphenyl)methanone	92088709	C21H25BrN2O3	205.073:[C11H11NO3]-	1.8910449473939446	205.073_113.5	11	1
12.999581894453131	0.1741	InChI=1S/C21H25BrN2O3/c1-2-3-4-13-26-18-8-5-16(6-9-18)21(25)24-12-11-19(15-24)27-20-10-7-17(22)14-23-20/h5-10,14,19H,2-4,11-13,15H2,1H3	432.105	[3-[(5-bromo-2-pyridyl)oxy]pyrrolidin-1-yl]-(4-pentoxyphenyl)methanone	92089277	C21H25BrN2O3	205.073:[C11H11NO3]-	1.8910449473939446	205.073_113.5	11	1
0.0	0.1741	InChI=1S/C21H25BrN2O3/c1-3-27-20-6-4-5-18(21-23-12-16(25)13-24-21)17(20)9-7-14-11-15(22)8-10-19(14)26-2/h4-6,8,10-11,16,25H,3,7,9,12-13H2,1-2H3,(H,23,24)	432.105	2-[2-[2-(5-bromo-2-methoxy-phenyl)ethyl]-3-ethoxy-phenyl]-1,4,5,6-tetrahydropyrimidin-5-ol	22744913	C21H25BrN2O3	NA	2.8223994024646846	NA	11	0
0.0	0.174	InChI=1S/C21H25BrN2O3/c1-15(2)27-19-8-3-16(13-23-19)14-24-20(25)21(9-11-26-12-10-21)17-4-6-18(22)7-5-17/h3-8,13,15H,9-12,14H2,1-2H3,(H,24,25)	432.105	4-(4-bromophenyl)-N-[(6-isopropoxy-3-pyridyl)methyl]tetrahydropyran-4-carboxamide	56345827	C21H25BrN2O3	NA	2.8206555425567945	NA	11	0
18.46567017744051	0.1739	InChI=1S/C18H20N6O3S2/c1-5-14(15(25)19-17-22-21-11(3)29-17)27-16(26)12-6-8-13(9-7-12)24-10(2)20-23-18(24)28-4/h6-9,14H,5H2,1-4H3,(H,19,22,25)	432.104	1-[(5-methyl-1,3,4-thiadiazol-2-yl)carbamoyl]propyl 4-(3-methyl-5-methylsulfanyl-1,2,4-triazol-4-yl)benzoate	23803358	C18H20N6O3S2	125.0244:[C6H7O3-H]-H-;205.073:[C11H11NO3]-	1.4947813798176097	125.0244_187.2;205.073_113.5	11	2
15.067307698437737	0.1738	InChI=1S/C21H25BrN2O3/c1-21(2,3)23-20(26)27-15-19(25)24(13-16-9-5-4-6-10-16)14-17-11-7-8-12-18(17)22/h4-12H,13-15H2,1-3H3,(H,23,26)	432.105	[2-[benzyl-[(2-bromophenyl)methyl]amino]-2-oxo-ethyl] N-tert-butylcarbamate	91217534	C21H25BrN2O3	59.0128:[C2H2O2+H]-;89.0232:[C3H3O3+2H]-;205.073:[C11H12NO3]-H-	1.7364344789451651	59.0128_188.8;89.0232_90.6;205.073_113.5	11	3
12.728640444810692	0.1735	InChI=1S/C21H25BrN2O3/c1-26-18-8-9-19(20(12-18)27-2)23-21(25)16-6-4-10-24(14-16)13-15-5-3-7-17(22)11-15/h3,5,7-9,11-12,16H,4,6,10,13-14H2,1-2H3,(H,23,25)	432.105	1-[(3-bromophenyl)methyl]-N-(2,4-dimethoxyphenyl)piperidine-3-carboxamide	43919965	C21H25BrN2O3	205.073:[C11H13NO3-H]-H-	1.8999066235340423	205.073_113.5	11	1
12.728640444810692	0.1735	InChI=1S/C21H25BrN2O3/c1-26-18-9-10-19(20(12-18)27-2)23-21(25)16-4-3-11-24(14-16)13-15-5-7-17(22)8-6-15/h5-10,12,16H,3-4,11,13-14H2,1-2H3,(H,23,25)	432.105	1-[(4-bromophenyl)methyl]-N-(2,4-dimethoxyphenyl)piperidine-3-carboxamide	43919966	C21H25BrN2O3	205.073:[C11H13NO3-H]-H-	1.8999066235340423	205.073_113.5	11	1
6.040151142470512	0.1735	InChI=1S/C20H15F3N4O4/c1-9(28)11-4-15-16(31-8-30-15)5-13(11)25-19(29)14-7-18-24-12(10-2-3-10)6-17(20(21,22)23)27(18)26-14/h4-7,10H,2-3,8H2,1H3,(H,25,29)	432.105	N-(6-acetyl-1,3-benzodioxol-5-yl)-5-cyclopropyl-7-(trifluoromethyl)pyrazolo[1,5-a]pyrimidine-2-carboxamide	1457984	C20H15F3N4O4	59.0128:[C2H2O2+H]-;125.0244:[C6H6O3]-H-	2.3796983423370777	59.0128_188.8;125.0244_187.2	11	2
9.513391801353375	0.1732	InChI=1S/C21H25BrN2O3/c1-4-11-23-21(26)16-7-5-6-8-18(16)24-20(25)13-27-19-10-9-15(14(2)3)12-17(19)22/h5-10,12,14H,4,11,13H2,1-3H3,(H,23,26)(H,24,25)	432.105	2-[[2-(2-bromo-4-isopropyl-phenoxy)acetyl]amino]-N-propyl-benzamide	17649168	C21H25BrN2O3	59.0128:[C2H3O2]-;205.073:[C11H9NO3+2H]-	2.125341410054121	59.0128_188.8;205.073_113.5	11	2
9.513391801353375	0.1732	InChI=1S/C21H25BrN2O3/c1-4-11-23-21(26)16-7-5-6-8-18(16)24-20(25)13-27-19-10-9-15(22)12-17(19)14(2)3/h5-10,12,14H,4,11,13H2,1-3H3,(H,23,26)(H,24,25)	432.105	2-[[2-(4-bromo-2-isopropyl-phenoxy)acetyl]amino]-N-propyl-benzamide	17188946	C21H25BrN2O3	59.0128:[C2H3O2]-;205.073:[C11H9NO3+2H]-	2.125341410054121	59.0128_188.8;205.073_113.5	11	2
0.0	0.1731	InChI=1S/C21H25BrN2O3/c1-13(2)27-17-6-4-5-15(11-17)14(3)23-21(25)24-19-9-10-26-20-8-7-16(22)12-18(19)20/h4-8,11-14,19H,9-10H2,1-3H3,(H2,23,24,25)	432.105	1-(6-bromochroman-4-yl)-3-[1-(3-isopropoxyphenyl)ethyl]urea	56013021	C21H25BrN2O3	NA	2.8067417008227005	NA	11	0
11.28398818404188	0.1731	InChI=1S/C21H25BrN2O3/c1-4-24(13-20(25)23-15(2)3)21(26)18-10-5-6-11-19(18)27-14-16-8-7-9-17(22)12-16/h5-12,15H,4,13-14H2,1-3H3,(H,23,25)	432.105	2-[(3-bromophenyl)methoxy]-N-ethyl-N-[2-(isopropylamino)-2-oxo-ethyl]benzamide	60408449	C21H25BrN2O3	205.073:[C11H12NO3]-H-	1.997700902410621	205.073_113.5	11	1
11.28398818404188	0.1731	InChI=1S/C21H25BrN2O3/c1-4-24(13-20(25)23-15(2)3)21(26)17-10-6-8-12-19(17)27-14-16-9-5-7-11-18(16)22/h5-12,15H,4,13-14H2,1-3H3,(H,23,25)	432.105	2-[(2-bromophenyl)methoxy]-N-ethyl-N-[2-(isopropylamino)-2-oxo-ethyl]benzamide	55343723	C21H25BrN2O3	205.073:[C11H12NO3]-H-	1.997700902410621	205.073_113.5	11	1
9.513391801353375	0.1731	InChI=1S/C21H25BrN2O3/c1-4-15-9-10-19(17(22)11-15)27-13-20(25)24-18-8-6-5-7-16(18)21(26)23-12-14(2)3/h5-11,14H,4,12-13H2,1-3H3,(H,23,26)(H,24,25)	432.105	2-[[2-(2-bromo-4-ethyl-phenoxy)acetyl]amino]-N-isobutyl-benzamide	17649156	C21H25BrN2O3	59.0128:[C2H3O2]-;205.073:[C11H9NO3+2H]-	2.1235512528340625	59.0128_188.8;205.073_113.5	11	2
9.513391801353375	0.173	InChI=1S/C21H25BrN2O3/c1-5-14-10-11-18(16(22)12-14)27-13-19(25)23-17-9-7-6-8-15(17)20(26)24-21(2,3)4/h6-12H,5,13H2,1-4H3,(H,23,25)(H,24,26)	432.105	2-[[2-(2-bromo-4-ethyl-phenoxy)acetyl]amino]-N-tert-butyl-benzamide	4936458	C21H25BrN2O3	59.0128:[C2H3O2]-;205.073:[C11H9NO3+2H]-	2.122232627684121	59.0128_188.8;205.073_113.5	11	2
11.28398818404188	0.173	InChI=1S/C21H25BrN2O3/c1-14(2)27-18-6-4-5-16(11-18)12-21(26)23-10-9-20(25)24-19-13-17(22)8-7-15(19)3/h4-8,11,13-14H,9-10,12H2,1-3H3,(H,23,26)(H,24,25)	432.105	N-(5-bromo-2-methyl-phenyl)-3-[[2-(3-isopropoxyphenyl)acetyl]amino]propanamide	56266557	C21H25BrN2O3	205.073:[C11H12NO3]-H-	1.994868687424905	205.073_113.5	11	1
11.28398818404188	0.173	InChI=1S/C21H25BrN2O3/c1-14(2)27-19-7-5-4-6-16(19)12-21(26)23-11-10-20(25)24-18-13-17(22)9-8-15(18)3/h4-9,13-14H,10-12H2,1-3H3,(H,23,26)(H,24,25)	432.105	N-(5-bromo-2-methyl-phenyl)-3-[[2-(2-isopropoxyphenyl)acetyl]amino]propanamide	99320529	C21H25BrN2O3	205.073:[C11H12NO3]-H-	1.994868687424905	205.073_113.5	11	1
13.610261276408536	0.173	InChI=1S/C21H25BrN2O3/c1-4-24(5-2)20(25)14-23(3)21(26)17-11-7-9-13-19(17)27-15-16-10-6-8-12-18(16)22/h6-13H,4-5,14-15H2,1-3H3	432.105	2-[(2-bromophenyl)methoxy]-N-[2-(diethylamino)-2-oxo-ethyl]-N-methyl-benzamide	60389585	C21H25BrN2O3	205.073:[C11H11NO3]-	1.8291336007558143	205.073_113.5	11	1
12.96577651281674	0.1729	InChI=1S/C21H25BrN2O3/c1-3-27-20-18(22)11-16(12-19(20)26-2)21(25)23-13-15-9-10-24(14-15)17-7-5-4-6-8-17/h4-8,11-12,15H,3,9-10,13-14H2,1-2H3,(H,23,25)	432.105	3-bromo-4-ethoxy-5-methoxy-N-[(1-phenylpyrrolidin-3-yl)methyl]benzamide	43071288	C21H25BrN2O3	205.073:[C11H13NO3-H]-H-	1.8729816605720984	205.073_113.5	11	1
7.1387304924235515	0.1727	InChI=1S/C22H21FO6S/c1-3-18(24)22-19(25)10-14(11-20(22)26)13-5-4-6-15(9-13)29-21-8-7-16(12-17(21)23)30(2,27)28/h4-9,12,14,24H,3,10-11H2,1-2H3	432.104	5-[3-(2-fluoro-4-methylsulfonyl-phenoxy)phenyl]-2-(1-hydroxypropylidene)cyclohexane-1,3-dione	20062270	C22H21FO6S	125.0244:[C6H6O3]-H-	2.2883945324577986	125.0244_187.2	11	1
13.610261276408536	0.1727	InChI=1S/C21H25BrN2O3/c1-3-4-13-27-19-11-7-17(8-12-19)21(26)23-14-20(25)24(2)15-16-5-9-18(22)10-6-16/h5-12H,3-4,13-15H2,1-2H3,(H,23,26)	432.105	N-[2-[(4-bromophenyl)methyl-methyl-amino]-2-oxo-ethyl]-4-butoxy-benzamide	60417567	C21H25BrN2O3	205.073:[C11H11NO3]-	1.8239968699606022	205.073_113.5	11	1
13.610261276408536	0.1727	InChI=1S/C21H25BrN2O3/c1-3-4-13-27-18-11-9-16(10-12-18)21(26)23-14-20(25)24(2)15-17-7-5-6-8-19(17)22/h5-12H,3-4,13-15H2,1-2H3,(H,23,26)	432.105	N-[2-[(2-bromophenyl)methyl-methyl-amino]-2-oxo-ethyl]-4-butoxy-benzamide	31215651	C21H25BrN2O3	205.073:[C11H11NO3]-	1.8239968699606022	205.073_113.5	11	1
11.532096610948697	0.1726	InChI=1S/C21H25BrN2O3/c1-26-18-11-16(12-19(27-2)20(18)22)21(25)23-17-9-6-10-24(14-17)13-15-7-4-3-5-8-15/h3-5,7-8,11-12,17H,6,9-10,13-14H2,1-2H3,(H,23,25)/t17-/m0/s1	432.105	N-[(3S)-1-benzyl-3-piperidyl]-4-bromo-3,5-dimethoxy-benzamide	52582678	C21H25BrN2O3	205.073:[C11H12NO3]-H-	1.9721041364987522	205.073_113.5	11	1
12.79649609672362	0.1726	InChI=1S/C21H25BrN2O3/c1-15-13-19(7-8-20(15)22)26-14-21(25)23-16-3-5-17(6-4-16)27-18-9-11-24(2)12-10-18/h3-8,13,18H,9-12,14H2,1-2H3,(H,23,25)	432.105	2-(4-bromo-3-methyl-phenoxy)-N-[4-[(1-methyl-4-piperidyl)oxy]phenyl]acetamide	99971722	C21H25BrN2O3	59.0128:[C2H2O2+H]-;205.073:[C11H12NO3]-H-	1.8810000227132515	59.0128_188.8;205.073_113.5	11	2
1.7370210033116482	0.1723	InChI=1S/C21H25BrN2O3/c1-2-27-20-10-9-15(22)13-17(20)19(14-16-7-3-5-11-23-16)24-12-6-4-8-18(24)21(25)26/h3,5,7,9-11,13,18-19H,2,4,6,8,12,14H2,1H3,(H,25,26)	432.105	1-[1-(5-bromo-2-ethoxy-phenyl)-2-(2-pyridyl)ethyl]piperidine-2-carboxylic acid	4527178	C21H25BrN2O3	59.0128:[C2H2O2+H]-	2.6694275170583404	59.0128_188.8	11	1
10.151743822000723	0.1723	InChI=1S/C20H15F3N4O4/c1-12-24-8-7-17(25-12)13-3-2-4-14(9-13)26-19(28)16-10-15(31-11-20(21,22)23)5-6-18(16)27(29)30/h2-10H,11H2,1H3,(H,26,28)	432.105	N-[3-(2-methylpyrimidin-4-yl)phenyl]-2-nitro-5-(2,2,2-trifluoroethoxy)benzamide	99488774	C20H15F3N4O4	191.0196:[C7H5F3NO2]-H-	2.065796867689848	191.0196_169.7	11	1
9.888569749476297	0.1722	InChI=1S/C21H25BrN2O3/c1-4-14(2)16-7-10-19(18(22)12-16)27-13-21(26)24-17-8-5-15(6-9-17)11-20(25)23-3/h5-10,12,14H,4,11,13H2,1-3H3,(H,23,25)(H,24,26)	432.105	2-[4-[[2-(2-bromo-4-sec-butyl-phenoxy)acetyl]amino]phenyl]-N-methyl-acetamide	43915073	C21H25BrN2O3	59.0128:[C2H2O2+H]-;205.073:[C11H10NO3+H]-	2.082966121883818	59.0128_188.8;205.073_113.5	11	2
10.220930711047645	0.1721	InChI=1S/C21H25BrN2O3/c1-15-13-19(14-21(26)23(15)2)27-18-9-11-24(12-10-18)20(25)8-5-16-3-6-17(22)7-4-16/h3-4,6-7,13-14,18H,5,8-12H2,1-2H3	432.105	4-[[1-[3-(4-bromophenyl)propanoyl]-4-piperidyl]oxy]-1,6-dimethyl-pyridin-2-one	92080959	C21H25BrN2O3	205.073:[C11H14NO3-2H]-H-	2.057292334581074	205.073_113.5	11	1
10.220930711047645	0.1721	InChI=1S/C21H25BrN2O3/c1-15-13-18(14-21(26)23(15)2)27-17-9-11-24(12-10-17)20(25)8-7-16-5-3-4-6-19(16)22/h3-6,13-14,17H,7-12H2,1-2H3	432.105	4-[[1-[3-(2-bromophenyl)propanoyl]-4-piperidyl]oxy]-1,6-dimethyl-pyridin-2-one	86265658	C21H25BrN2O3	205.073:[C11H14NO3-2H]-H-	2.057292334581074	205.073_113.5	11	1
11.791846261535314	0.1715	InChI=1S/C21H25BrN2O3/c1-15-13-23(14-16-7-5-4-6-8-16)9-10-24(15)21(25)17-11-18(26-2)20(22)19(12-17)27-3/h4-8,11-12,15H,9-10,13-14H2,1-3H3/t15-/m0/s1	432.105	[(2S)-4-benzyl-2-methyl-piperazin-1-yl]-(4-bromo-3,5-dimethoxy-phenyl)methanone	97916213	C21H25BrN2O3	205.073:[C11H12NO3]-H-	1.9350024241094037	205.073_113.5	11	1
8.676102345880668	0.1713	InChI=1S/C21H25BrN2O3/c1-13(2)14-5-7-15(8-6-14)21-23-19-18(22)16(12-25)11-17(27-4)20(19)24(21)9-10-26-3/h5-8,11,13,25H,9-10,12H2,1-4H3	432.105	[4-bromo-2-(4-isopropylphenyl)-7-methoxy-1-(2-methoxyethyl)benzimidazol-5-yl]methanol	57771990	C21H25BrN2O3	205.073:[C11H14NO3-2H]-H-	2.1553313825161804	205.073_113.5	11	1
1.1899204479317167	0.171	InChI=1S/C21H25BrN2O3/c1-25-17-6-4-5-16(11-17)19(24-7-2-3-8-24)13-23-12-15-9-18(22)21-20(10-15)26-14-27-21/h4-6,9-11,19,23H,2-3,7-8,12-14H2,1H3/t19-/m0/s1	432.105	(2R)-N-[(7-bromo-1,3-benzodioxol-5-yl)methyl]-2-(3-methoxyphenyl)-2-pyrrolidin-1-yl-ethanamine	95570609	C21H25BrN2O3	59.0128:[C2H2O2+H]-	2.6873064015590318	59.0128_188.8	11	1
1.1899204479317167	0.171	InChI=1S/C21H25BrN2O3/c1-25-17-6-4-16(5-7-17)19(24-8-2-3-9-24)13-23-12-15-10-18(22)21-20(11-15)26-14-27-21/h4-7,10-11,19,23H,2-3,8-9,12-14H2,1H3	432.105	N-[(7-bromo-1,3-benzodioxol-5-yl)methyl]-2-(4-methoxyphenyl)-2-pyrrolidin-1-yl-ethanamine	60590192	C21H25BrN2O3	59.0128:[C2H2O2+H]-	2.6873064015590318	59.0128_188.8	11	1
0.0	0.1705	InChI=1S/C24H23Cl2FO2/c1-24(2)19(13-21(25)26)22(24)23(28)29-20-12-15(17-5-3-4-6-18(17)20)11-14-7-9-16(27)10-8-14/h3-10,13,15,19-20,22H,11-12H2,1-2H3/t15-,19?,20-,22?/m1/s1	432.106	[(1R,3R)-3-[(4-fluorophenyl)methyl]indan-1-yl] 3-(2,2-dichlorovinyl)-2,2-dimethyl-cyclopropanecarboxylate	88694588	C24H23Cl2FO2	NA	2.7650727482183712	NA	11	0
0.0	0.1705	InChI=1S/C24H23Cl2FO2/c1-24(2)19(13-21(25)26)22(24)23(28)29-20-12-15(17-8-3-4-9-18(17)20)10-14-6-5-7-16(27)11-14/h3-9,11,13,15,19-20,22H,10,12H2,1-2H3/t15-,19?,20-,22?/m1/s1	432.106	[(1R,3R)-3-[(3-fluorophenyl)methyl]indan-1-yl] 3-(2,2-dichlorovinyl)-2,2-dimethyl-cyclopropanecarboxylate	88694046	C24H23Cl2FO2	NA	2.7650727482183712	NA	11	0
16.380462319301913	0.1704	InChI=1S/C20H15F3N4O4/c1-12-8-15(27(30)31)6-7-16(12)25-18(28)10-26-11-24-17(9-19(26)29)13-2-4-14(5-3-13)20(21,22)23/h2-9,11H,10H2,1H3,(H,25,28)	432.105	N-(2-methyl-4-nitro-phenyl)-2-[6-oxo-4-[4-(trifluoromethyl)phenyl]pyrimidin-1-yl]acetamide	25885053	C20H15F3N4O4	125.0244:[C4H4N3O2]-H-;191.0196:[C10H5F2NO-H]-H-	1.5884755742872558	125.0244_187.2;191.0196_169.7	11	2
8.93180567554722	0.1702	InChI=1S/C21H25BrN2O3/c1-26-18-11-15(12-19(27-2)20(18)22)21(25)24-17-9-7-16(8-10-17)23-13-14-5-3-4-6-14/h7-12,14,23H,3-6,13H2,1-2H3,(H,24,25)	432.105	4-bromo-N-[4-(cyclopentylmethylamino)phenyl]-3,5-dimethoxy-benzamide	52865265	C21H25BrN2O3	205.073:[C11H10NO3+H]-	2.1196857098261126	205.073_113.5	11	1
13.05941065704062	0.1701	InChI=1S/C21H25BrN2O3/c1-15(2-3-16-4-6-19(22)7-5-16)23-20(25)17-8-11-24(12-9-17)21(26)18-10-13-27-14-18/h4-7,10,13-15,17H,2-3,8-9,11-12H2,1H3,(H,23,25)/t15-/m1/s1	432.105	N-[(1R)-3-(4-bromophenyl)-1-methyl-propyl]-1-(furan-3-carbonyl)piperidine-4-carboxamide	95669781	C21H25BrN2O3	205.073:[C11H13NO3-H]-H-	1.8219689328109188	205.073_113.5	11	1
8.61215843513532	0.1699	InChI=1S/C21H25BrN2O3/c1-15-6-5-7-18(12-15)27-11-4-3-8-20(25)23-14-21(26)24-17-9-10-19(22)16(2)13-17/h5-7,9-10,12-13H,3-4,8,11,14H2,1-2H3,(H,23,25)(H,24,26)	432.105	N-[2-(4-bromo-3-methyl-anilino)-2-oxo-ethyl]-5-(3-methylphenoxy)pentanamide	52815489	C21H25BrN2O3	205.073:[C11H14NO3-2H]-H-	2.136360493838828	205.073_113.5	11	1
13.074155942010256	0.1699	InChI=1S/C21H25BrN2O3/c1-21(2,3)15-9-11-16(12-10-15)27-14-20(26)24(4)13-19(25)23-18-8-6-5-7-17(18)22/h5-12H,13-14H2,1-4H3,(H,23,25)	432.105	N-(2-bromophenyl)-2-[[2-(4-tert-butylphenoxy)acetyl]-methyl-amino]acetamide	26622547	C21H25BrN2O3	59.0128:[C2H2O2+H]-;205.073:[C11H12NO3]-H-	1.8167640159818104	59.0128_188.8;205.073_113.5	11	2
1.7370210033116482	0.1699	InChI=1S/C21H25BrN2O3/c1-3-27-19-10-8-15(22)12-16(19)20(17-9-7-14(2)13-23-17)24-11-5-4-6-18(24)21(25)26/h7-10,12-13,18,20H,3-6,11H2,1-2H3,(H,25,26)	432.105	1-[(5-bromo-2-ethoxy-phenyl)-(5-methyl-2-pyridyl)methyl]piperidine-2-carboxylic acid	3899161	C21H25BrN2O3	59.0128:[C2H2O2+H]-	2.629553796224157	59.0128_188.8	11	1
0.0	0.1699	InChI=1S/C25H20O5S/c26-17-18-10-11-20(16-24(18)23-8-4-5-9-25(23)27)30-19-12-14-22(15-13-19)31(28,29)21-6-2-1-3-7-21/h1-16,26-27H,17H2	432.103	2-[5-[4-(benzenesulfonyl)phenoxy]-2-(hydroxymethyl)phenyl]phenol	118917441	C25H20O5S	NA	2.7547575525283405	NA	11	0
13.074155942010256	0.1699	InChI=1S/C21H25BrN2O3/c1-21(2,3)15-9-5-8-12-18(15)27-14-20(26)24(4)13-19(25)23-17-11-7-6-10-16(17)22/h5-12H,13-14H2,1-4H3,(H,23,25)	432.105	N-(2-bromophenyl)-2-[[2-(2-tert-butylphenoxy)acetyl]-methyl-amino]acetamide	27800937	C21H25BrN2O3	59.0128:[C2H2O2+H]-;205.073:[C11H12NO3]-H-	1.8167640159818104	59.0128_188.8;205.073_113.5	11	2
13.074155942010256	0.1699	InChI=1S/C21H25BrN2O3/c1-4-15(2)16-9-5-8-12-19(16)27-14-21(26)24(3)13-20(25)23-18-11-7-6-10-17(18)22/h5-12,15H,4,13-14H2,1-3H3,(H,23,25)/t15-/m0/s1	432.105	N-(2-bromophenyl)-2-[methyl-[2-[2-[(1S)-1-methylpropyl]phenoxy]acetyl]amino]acetamide	95271619	C21H25BrN2O3	59.0128:[C2H2O2+H]-;205.073:[C11H12NO3]-H-	1.8169259985177753	59.0128_188.8;205.073_113.5	11	2
8.164408682720692	0.1694	InChI=1S/C21H25BrN2O3/c1-5-9-23-21(26)16-7-6-8-18(12-16)24-20(25)15(4)27-19-13(2)10-17(22)11-14(19)3/h6-8,10-12,15H,5,9H2,1-4H3,(H,23,26)(H,24,25)	432.105	3-[2-(4-bromo-2,6-dimethyl-phenoxy)propanoylamino]-N-propyl-benzamide	17222727	C21H25BrN2O3	205.073:[C11H10NO3+H]-	2.1613383311537335	205.073_113.5	11	1
13.05941065704062	0.1693	InChI=1S/C21H25BrN2O3/c1-21(2,17-3-5-18(22)6-4-17)14-23-19(25)15-7-10-24(11-8-15)20(26)16-9-12-27-13-16/h3-6,9,12-13,15H,7-8,10-11,14H2,1-2H3,(H,23,25)	432.105	N-[2-(4-bromophenyl)-2-methyl-propyl]-1-(furan-3-carbonyl)piperidine-4-carboxamide	52611511	C21H25BrN2O3	205.073:[C11H13NO3-H]-H-	1.8075651538938797	205.073_113.5	11	1
7.973516072929285	0.1693	InChI=1S/C21H25BrN2O3/c1-12(2)27-18-10-16(22)6-7-17(18)21(26)23-11-19(25)24-20-14(4)8-13(3)9-15(20)5/h6-10,12H,11H2,1-5H3,(H,23,26)(H,24,25)	432.105	4-bromo-2-isopropoxy-N-[2-oxo-2-(2,4,6-trimethylanilino)ethyl]benzamide	52744748	C21H25BrN2O3	205.073:[C11H14NO3-2H]-H-	2.1738345163428288	205.073_113.5	11	1
8.973572919573694	0.1692	InChI=1S/C22H19ClF2N2O3/c1-13-20(21(26-30-13)16-4-2-3-5-17(16)23)22(28)27-10-8-15(9-11-27)29-19-7-6-14(24)12-18(19)25/h2-7,12,15H,8-11H2,1H3	432.105	[3-(2-chlorophenyl)-5-methyl-isoxazol-4-yl]-[4-(2,4-difluorophenoxy)-1-piperidyl]methanone	112836595	C22H19ClF2N2O3	100.9666:[C3ClNO]-;205.073:[C11H13NO3-H]-H-	2.099780369368266	100.9666_99.2;205.073_113.5	11	2
0.0	0.169	InChI=1S/C21H25BrN2O3/c1-15(2)27-19-16(4-3-11-23-19)14-24-20(25)21(9-12-26-13-10-21)17-5-7-18(22)8-6-17/h3-8,11,15H,9-10,12-14H2,1-2H3,(H,24,25)	432.105	4-(4-bromophenyl)-N-[(2-isopropoxy-3-pyridyl)methyl]tetrahydropyran-4-carboxamide	56357029	C21H25BrN2O3	NA	2.7396232745612177	NA	11	0
11.791846261535314	0.169	InChI=1S/C21H25BrN2O3/c1-26-18-13-17(14-19(27-2)20(18)22)21(25)24-10-6-9-23(11-12-24)15-16-7-4-3-5-8-16/h3-5,7-8,13-14H,6,9-12,15H2,1-2H3	432.105	(4-benzyl-1,4-diazepan-1-yl)-(4-bromo-3,5-dimethoxy-phenyl)methanone	18157552	C21H25BrN2O3	205.073:[C11H12NO3]-H-	1.8937806153225571	205.073_113.5	11	1
3.8095692983714406	0.1688	InChI=1S/C22H19ClF2N2O3/c1-13-11-15(23)12-16-17(14-5-3-2-4-6-14)19(30-21(28)29)20(26-18(13)16)27-9-7-22(24,25)8-10-27/h2-6,11-12H,7-10H2,1H3,(H,28,29)	432.105	[6-chloro-2-(4,4-difluoro-1-piperidyl)-8-methyl-4-phenyl-3-quinolyl] hydrogen carbonate	122684481	C22H19ClF2N2O3	125.0244:[C6H3O3+2H]-	2.463242299427592	125.0244_187.2	11	1
19.725871857674072	0.1686	InChI=1S/C18H15ClF2N8O/c1-10-25-16(30-28-10)9-29-8-11(5-24-29)26-18-23-7-13(19)17(27-18)22-6-12-14(20)3-2-4-15(12)21/h2-5,7-8H,6,9H2,1H3,(H2,22,23,26,27)	432.103	5-chloro-N4-[(2,6-difluorophenyl)methyl]-N2-[1-[(3-methyl-1,2,4-oxadiazol-5-yl)methyl]pyrazol-4-yl]pyrimidine-2,4-diamine	90023123	C18H15ClF2N8O	191.0196:[C7H4ClF2N2+2H]-;205.073:[C7H6N7O+H]-	1.3181120890979403	191.0196_169.7;205.073_113.5	11	2
0.0	0.1685	InChI=1S/C24H20O6Si/c1-2-18-31(28-22(25)19-12-6-3-7-13-19,29-23(26)20-14-8-4-9-15-20)30-24(27)21-16-10-5-11-17-21/h2-17H,1,18H2	432.103	[allyl(dibenzoyloxy)silyl] benzoate	23325081	C24H20O6Si	NA	2.732773556057952	NA	11	0
0.0	0.1684	InChI=1S/C22H19ClF2N2O3/c1-2-4-17-21(13-6-8-14(23)9-7-13)27-18(30-17)5-3-12-29-16-11-10-15(24)19(20(16)25)22(26)28/h2,6-11H,1,3-5,12H2,(H2,26,28)	432.105	3-[3-[5-allyl-4-(4-chlorophenyl)oxazol-2-yl]propoxy]-2,6-difluoro-benzamide	89157321	C22H19ClF2N2O3	NA	2.7308808808879492	NA	11	0
15.272770809581603	0.1683	InChI=1S/C21H25BrN2O3/c1-6-16-17(11-8-12-18(16)27-5)20(26)24(23-21(2,3)4)19(25)14-9-7-10-15(22)13-14/h7-13,23H,6H2,1-5H3	432.105	N-(3-bromobenzoyl)-N''-tert-butyl-2-ethyl-3-methoxy-benzohydrazide	122552961	C21H25BrN2O3	205.073:[C11H11NO3]-	1.6331180861374566	205.073_113.5	11	1
10.250316546383468	0.1683	InChI=1S/C21H25BrN2O3/c1-23(2)16-9-6-14(7-10-16)20(24-12-4-5-18(24)21(25)26)17-13-15(22)8-11-19(17)27-3/h6-11,13,18,20H,4-5,12H2,1-3H3,(H,25,26)	432.105	1-[(5-bromo-2-methoxy-phenyl)-[4-(dimethylamino)phenyl]methyl]pyrrolidine-2-carboxylic acid	4046008	C21H25BrN2O3	59.0128:[C2H2O2+H]-;205.073:[C11H14NO3-2H]-H-	1.993317905380136	59.0128_188.8;205.073_113.5	11	2
12.728640444810692	0.1681	InChI=1S/C21H25BrN2O3/c1-26-18-10-6-8-16(20(18)27-2)14-23-21(25)19(24-11-3-4-12-24)15-7-5-9-17(22)13-15/h5-10,13,19H,3-4,11-12,14H2,1-2H3,(H,23,25)/t19-/m0/s1	432.105	(2S)-2-(3-bromophenyl)-N-[(2,3-dimethoxyphenyl)methyl]-2-pyrrolidin-1-yl-acetamide	95784806	C21H25BrN2O3	205.073:[C11H13NO3-H]-H-	1.8133031492392722	205.073_113.5	11	1
13.946061099605998	0.1679	InChI=1S/C18H20N6O3S2/c1-3-5-8-24-14-13(15(25)20-17(24)26)23(4-2)12(19-14)10-29-18-22-21-16(27-18)11-7-6-9-28-11/h6-7,9H,3-5,8,10H2,1-2H3,(H,20,25,26)	432.104	3-butyl-7-ethyl-8-[[5-(2-thienyl)-1,3,4-oxadiazol-2-yl]sulfanylmethyl]purine-2,6-dione	46607125	C18H20N6O3S2	205.073:[C9H10N4O2]-H-	1.7213173555666037	205.073_113.5	11	1
12.400708986127249	0.1678	InChI=1S/C21H25BrN2O3/c1-26-18-6-7-20(27-2)19(13-18)23-21(25)16-8-10-24(11-9-16)14-15-4-3-5-17(22)12-15/h3-7,12-13,16H,8-11,14H2,1-2H3,(H,23,25)	432.105	1-[(3-bromophenyl)methyl]-N-(2,5-dimethoxyphenyl)piperidine-4-carboxamide	43920054	C21H25BrN2O3	205.073:[C11H13NO3-H]-H-	1.8310589532806338	205.073_113.5	11	1
12.400708986127249	0.1678	InChI=1S/C21H25BrN2O3/c1-26-18-7-8-20(27-2)19(13-18)23-21(25)16-9-11-24(12-10-16)14-15-3-5-17(22)6-4-15/h3-8,13,16H,9-12,14H2,1-2H3,(H,23,25)	432.105	1-[(4-bromophenyl)methyl]-N-(2,5-dimethoxyphenyl)piperidine-4-carboxamide	43920055	C21H25BrN2O3	205.073:[C11H13NO3-H]-H-	1.8310589532806338	205.073_113.5	11	1
11.791846261535314	0.1678	InChI=1S/C21H25BrN2O3/c1-3-11-27-20-18(22)12-15(13-19(20)26-2)21(25)24-10-9-17(14-24)23-16-7-5-4-6-8-16/h4-8,12-13,17,23H,3,9-11,14H2,1-2H3	432.105	(3-anilinopyrrolidin-1-yl)-(3-bromo-5-methoxy-4-propoxy-phenyl)methanone	56433338	C21H25BrN2O3	205.073:[C11H12NO3]-H-	1.8748694913778492	205.073_113.5	11	1
10.151743822000723	0.1677	InChI=1S/C19H20ClF3N2O4/c1-25(9-10-28-15-6-3-13(20)4-7-15)18(26)24-14-5-8-16(27-2)17(11-14)29-12-19(21,22)23/h3-8,11H,9-10,12H2,1-2H3,(H,24,26)	432.106	1-[2-(4-chlorophenoxy)ethyl]-3-[4-methoxy-3-(2,2,2-trifluoroethoxy)phenyl]-1-methyl-urea	112825794	C19H20ClF3N2O4	191.0196:[C7H5F3NO2]-H-	1.9909489284089612	191.0196_169.7	11	1
10.046637043996936	0.1675	InChI=1S/C20H15F3N4O4/c21-20(22,23)13-3-1-2-11(6-13)17-25-18(31-26-17)12-8-27(9-12)19(28)24-14-4-5-15-16(7-14)30-10-29-15/h1-7,12H,8-10H2,(H,24,28)	432.105	N-(1,3-benzodioxol-5-yl)-3-[3-[3-(trifluoromethyl)phenyl]-1,2,4-oxadiazol-5-yl]azetidine-1-carboxamide	121095896	C20H15F3N4O4	59.0128:[C2H2O2+H]-;205.073:[C9H8N4O2+H]-	1.995249348628019	59.0128_188.8;205.073_113.5	11	2
1.6922696542693398	0.1675	InChI=1S/C21H25BrN2O3/c1-2-27-20-7-6-16(22)13-18(20)19(14-17-5-3-4-10-23-17)24-11-8-15(9-12-24)21(25)26/h3-7,10,13,15,19H,2,8-9,11-12,14H2,1H3,(H,25,26)	432.105	1-[1-(5-bromo-2-ethoxy-phenyl)-2-(2-pyridyl)ethyl]piperidine-4-carboxylic acid	3935850	C21H25BrN2O3	59.0128:[C2H2O2+H]-	2.5948610947065043	59.0128_188.8	11	1
1.6922696542693398	0.1675	InChI=1S/C21H25BrN2O3/c1-2-27-20-9-8-16(22)12-18(20)19(13-17-7-3-4-10-23-17)24-11-5-6-15(14-24)21(25)26/h3-4,7-10,12,15,19H,2,5-6,11,13-14H2,1H3,(H,25,26)	432.105	1-[1-(5-bromo-2-ethoxy-phenyl)-2-(2-pyridyl)ethyl]piperidine-3-carboxylic acid	3873603	C21H25BrN2O3	59.0128:[C2H2O2+H]-	2.5948610947065043	59.0128_188.8	11	1
12.728640444810692	0.1673	InChI=1S/C21H25BrN2O3/c1-26-18-8-9-20(27-2)19(12-18)23-21(25)16-6-4-10-24(14-16)13-15-5-3-7-17(22)11-15/h3,5,7-9,11-12,16H,4,6,10,13-14H2,1-2H3,(H,23,25)	432.105	1-[(3-bromophenyl)methyl]-N-(2,5-dimethoxyphenyl)piperidine-3-carboxamide	43920046	C21H25BrN2O3	205.073:[C11H13NO3-H]-H-	1.7989385651511463	205.073_113.5	11	1
12.728640444810692	0.1673	InChI=1S/C21H25BrN2O3/c1-26-18-9-10-20(27-2)19(12-18)23-21(25)16-4-3-11-24(14-16)13-15-5-7-17(22)8-6-15/h5-10,12,16H,3-4,11,13-14H2,1-2H3,(H,23,25)	432.105	1-[(4-bromophenyl)methyl]-N-(2,5-dimethoxyphenyl)piperidine-3-carboxamide	43920047	C21H25BrN2O3	205.073:[C11H13NO3-H]-H-	1.7989385651511463	205.073_113.5	11	1
7.973516072929285	0.1672	InChI=1S/C21H25BrN2O3/c1-14-10-15(2)21(16(3)11-14)24-20(26)13-23-19(25)8-5-9-27-18-7-4-6-17(22)12-18/h4,6-7,10-12H,5,8-9,13H2,1-3H3,(H,23,25)(H,24,26)	432.105	4-(3-bromophenoxy)-N-[2-oxo-2-(2,4,6-trimethylanilino)ethyl]butanamide	27782873	C21H25BrN2O3	205.073:[C11H14NO3-2H]-H-	2.138820579415177	205.073_113.5	11	1
15.302530930677877	0.1669	InChI=1S/C21H25BrN2O3/c1-3-24(4-2)12-13-27-19(25)14-16-6-5-7-18(20(16)23)21(26)15-8-10-17(22)11-9-15/h5-11H,3-4,12-14,23H2,1-2H3	432.105	2-(diethylamino)ethyl 2-[2-amino-3-(4-bromobenzoyl)phenyl]acetate	24811827	C21H25BrN2O3	59.0128:[C2H2O2+H]-;205.073:[C11H11NO3]-	1.6075931854791836	59.0128_188.8;205.073_113.5	11	2
0.0	0.1666	InChI=1S/C25H18ClFN2O2/c1-2-30-24-13-17(11-21(15-29)18-7-9-22(27)10-8-18)12-23(26)25(24)31-16-20-6-4-3-5-19(20)14-28/h3-13H,2,16H2,1H3	432.104	2-[[2-chloro-4-[2-cyano-2-(4-fluorophenyl)vinyl]-6-ethoxy-phenoxy]methyl]benzonitrile	2967927	C25H18ClFN2O2	NA	2.701393985934306	NA	11	0
0.0	0.1666	InChI=1S/C25H18ClFN2O2/c1-2-30-24-13-17(11-20(15-29)21-9-5-6-10-23(21)27)12-22(26)25(24)31-16-19-8-4-3-7-18(19)14-28/h3-13H,2,16H2,1H3	432.104	2-[[2-chloro-4-[2-cyano-2-(2-fluorophenyl)vinyl]-6-ethoxy-phenoxy]methyl]benzonitrile	3904914	C25H18ClFN2O2	NA	2.701393985934306	NA	11	0
8.37679663092799	0.1665	InChI=1S/C22H19ClF2N2O3/c23-17-10-16(7-8-18(17)25)27-21(29)19(14-3-5-15(24)6-4-14)20(22(27)30)26-9-1-2-13(11-26)12-28/h3-8,10,13,28H,1-2,9,11-12H2	432.105	1-(3-chloro-4-fluoro-phenyl)-3-(4-fluorophenyl)-4-[3-(hydroxymethyl)-1-piperidyl]pyrrole-2,5-dione	110545154	C22H19ClF2N2O3	205.073:[C11H12NO3]-H-	2.0988526202464044	205.073_113.5	11	1
11.366686141832925	0.1662	InChI=1S/C21H25BrN2O3/c1-13-10-15(22)11-14(2)20(13)23-21(25)24-9-5-6-18(24)17-8-7-16(26-3)12-19(17)27-4/h7-8,10-12,18H,5-6,9H2,1-4H3,(H,23,25)	432.105	N-(4-bromo-2,6-dimethyl-phenyl)-2-(2,4-dimethoxyphenyl)pyrrolidine-1-carboxamide	60455341	C21H25BrN2O3	205.073:[C11H12NO3]-H-	1.8799018064112747	205.073_113.5	11	1
11.072335029968016	0.1661	InChI=1S/C21H25BrN2O3/c1-3-26-19-10-9-15(13-20(19)27-4-2)21(25)23-16-11-12-24(14-16)18-8-6-5-7-17(18)22/h5-10,13,16H,3-4,11-12,14H2,1-2H3,(H,23,25)/t16-/m0/s1	432.105	N-[(3S)-1-(2-bromophenyl)pyrrolidin-3-yl]-3,4-diethoxy-benzamide	96511195	C21H25BrN2O3	205.073:[C11H12NO3]-H-	1.8996594732152325	205.073_113.5	11	1
15.290671708616783	0.1659	InChI=1S/C21H25BrN2O3/c1-4-24(5-2)14(3)27-19(25)13-16-7-6-8-18(20(16)23)21(26)15-9-11-17(22)12-10-15/h6-12,14H,4-5,13,23H2,1-3H3	432.105	1-(diethylamino)ethyl 2-[2-amino-3-(4-bromobenzoyl)phenyl]acetate	67463734	C21H25BrN2O3	59.0128:[C2H2O2+H]-;205.073:[C11H11NO3]-	1.5923107336347053	59.0128_188.8;205.073_113.5	11	2
8.61215843513532	0.1659	InChI=1S/C21H25BrN2O3/c1-4-21(2,3)24-20(26)15-8-10-17(11-9-15)23-19(25)12-13-27-18-7-5-6-16(22)14-18/h5-11,14H,4,12-13H2,1-3H3,(H,23,25)(H,24,26)	432.105	4-[3-(3-bromophenoxy)propanoylamino]-N-(1,1-dimethylpropyl)benzamide	55892339	C21H25BrN2O3	205.073:[C11H9NO3+2H]-	2.0720384451827543	205.073_113.5	11	1
16.106904378681055	0.1658	InChI=1S/C21H25BrN2O3/c1-15(24(2)13-12-16-6-10-19(22)11-7-16)20(25)23-14-17-4-8-18(9-5-17)21(26)27-3/h4-11,15H,12-14H2,1-3H3,(H,23,25)	432.105	methyl 4-[[2-[2-(4-bromophenyl)ethyl-methyl-amino]propanoylamino]methyl]benzoate	60269617	C21H25BrN2O3	59.0128:[C2H3O2]-;205.073:[C11H11NO3]-	1.5325256903613993	59.0128_188.8;205.073_113.5	11	2
9.695921929963228	0.1657	InChI=1S/C20H15F3N4O4/c1-24-18(28)17(27-29-2)12-8-7-11(21)9-15(12)31-20-16(23)19(25-10-26-20)30-14-6-4-3-5-13(14)22/h3-10H,1-2H3,(H,24,28)/b27-17+	432.105	(2E)-2-[4-fluoro-2-[5-fluoro-6-(2-fluorophenoxy)pyrimidin-4-yl]oxy-phenyl]-2-methoxyimino-N-methyl-acetamide	60012683	C20H15F3N4O4	191.0196:[C10H5F2NO-H]-H-	1.9908479630303515	191.0196_169.7	11	1
9.695921929963228	0.1657	InChI=1S/C20H15F3N4O4/c1-24-18(28)17(27-29-2)14-7-6-12(22)9-15(14)31-20-16(23)19(25-10-26-20)30-13-5-3-4-11(21)8-13/h3-10H,1-2H3,(H,24,28)/b27-17+	432.105	(2E)-2-[4-fluoro-2-[5-fluoro-6-(3-fluorophenoxy)pyrimidin-4-yl]oxy-phenyl]-2-methoxyimino-N-methyl-acetamide	60012634	C20H15F3N4O4	191.0196:[C10H5F2NO-H]-H-	1.9908479630303515	191.0196_169.7	11	1
13.494272761167883	0.1657	InChI=1S/C21H25BrN2O3/c1-13-10-17(22)11-14(2)20(13)27-15(3)21(26)23-18-8-6-16(7-9-18)12-19(25)24(4)5/h6-11,15H,12H2,1-5H3,(H,23,26)	432.105	2-(4-bromo-2,6-dimethyl-phenoxy)-N-[4-[2-(dimethylamino)-2-oxo-ethyl]phenyl]propanamide	43914998	C21H25BrN2O3	205.073:[C11H11NO3]-	1.7178865836089559	205.073_113.5	11	1
1.6922696542693398	0.1652	InChI=1S/C21H25BrN2O3/c1-3-27-19-9-7-16(22)11-17(19)20(18-8-6-14(2)12-23-18)24-10-4-5-15(13-24)21(25)26/h6-9,11-12,15,20H,3-5,10,13H2,1-2H3,(H,25,26)	432.105	1-[(5-bromo-2-ethoxy-phenyl)-(5-methyl-2-pyridyl)methyl]piperidine-3-carboxylic acid	3346198	C21H25BrN2O3	59.0128:[C2H2O2+H]-	2.5579032263163373	59.0128_188.8	11	1
1.6922696542693398	0.1652	InChI=1S/C21H25BrN2O3/c1-3-27-19-7-5-16(22)12-17(19)20(18-6-4-14(2)13-23-18)24-10-8-15(9-11-24)21(25)26/h4-7,12-13,15,20H,3,8-11H2,1-2H3,(H,25,26)	432.105	1-[(5-bromo-2-ethoxy-phenyl)-(5-methyl-2-pyridyl)methyl]piperidine-4-carboxylic acid	4441244	C21H25BrN2O3	59.0128:[C2H2O2+H]-	2.5579032263163373	59.0128_188.8	11	1
17.628450670417006	0.1651	InChI=1S/C18H20N6O3S2/c1-27-18(26)20-17-24-22-15(29-17)10-6-5-9-14-21-23-16(28-14)19-13(25)11-12-7-3-2-4-8-12/h2-4,7-8H,5-6,9-11H2,1H3,(H,19,23,25)(H,20,24,26)	432.104	methyl N-[5-[4-[5-[(2-phenylacetyl)amino]-1,3,4-thiadiazol-2-yl]butyl]-1,3,4-thiadiazol-2-yl]carbamate	89597094	C18H20N6O3S2	59.0128:[C2H3O2]-;125.0244:[C4H4N3O2]-H-;205.073:[C9H12N4O2-2H]-H-	1.4122374202185886	59.0128_188.8;125.0244_187.2;205.073_113.5	11	3
9.620858537544315	0.1649	InChI=1S/C21H25BrN2O3/c1-14(15-6-4-7-17(22)12-15)23-21(25)24-11-5-8-18(24)16-9-10-19(26-2)20(13-16)27-3/h4,6-7,9-10,12-14,18H,5,8,11H2,1-3H3,(H,23,25)/t14-,18+/m1/s1	432.105	(2S)-N-[(1R)-1-(3-bromophenyl)ethyl]-2-(3,4-dimethoxyphenyl)pyrrolidine-1-carboxamide	95640560	C21H25BrN2O3	205.073:[C11H13NO3-H]-H-	1.9831458782548197	205.073_113.5	11	1
13.946061099605998	0.1646	InChI=1S/C18H20N6O3S2/c1-4-5-7-24-14-12(15(25)21-17(24)27)22(2)11(20-14)9-29-18-19-10-6-8-28-13(10)16(26)23(18)3/h6,8H,4-5,7,9H2,1-3H3,(H,21,25,27)	432.104	3-butyl-7-methyl-8-[(3-methyl-4-oxo-thieno[3,2-d]pyrimidin-2-yl)sulfanylmethyl]purine-2,6-dione	55459334	C18H20N6O3S2	205.073:[C9H10N4O2]-H-	1.6685943475434117	205.073_113.5	11	1
10.862375580505589	0.1645	InChI=1S/C23H17FN4O2S/c24-17-8-6-15(7-9-17)14-31-23-19(5-2-12-25-23)22(30)26-18-4-1-3-16(13-18)20-10-11-21(29)28-27-20/h1-13H,14H2,(H,26,30)(H,28,29)	432.106	2-[(4-fluorophenyl)methylsulfanyl]-N-[3-(6-oxo-1H-pyridazin-3-yl)phenyl]pyridine-3-carboxamide	56214233	C23H17FN4O2S	191.0196:[C10H8FNS-H]-H-	1.888605514816529	191.0196_169.7	11	1
9.206886003183637	0.1642	InChI=1S/C21H25BrN2O3/c1-3-27-20-16(22)13-15(14-19(20)26-2)21(25)23-17-9-5-6-10-18(17)24-11-7-4-8-12-24/h5-6,9-10,13-14H,3-4,7-8,11-12H2,1-2H3,(H,23,25)	432.105	3-bromo-4-ethoxy-5-methoxy-N-[2-(1-piperidyl)phenyl]benzamide	16256886	C21H25BrN2O3	205.073:[C11H11NO3]-	2.002170750892339	205.073_113.5	11	1
16.247067734554822	0.1639	InChI=1S/C18H20N6O3S2/c1-11-8-29-17-20-12(7-13(25)24(11)17)9-28-6-4-5-23-16(26)14-15(19-10-21(14)2)22(3)18(23)27/h7-8,10H,4-6,9H2,1-3H3	432.104	3,7-dimethyl-1-[3-[(3-methyl-5-oxo-thiazolo[3,2-a]pyrimidin-7-yl)methylsulfanyl]propyl]purine-2,6-dione	60422161	C18H20N6O3S2	205.073:[C9H11N4O2-H]-H-	1.491252721134917	205.073_113.5	11	1
0.0	0.1638	InChI=1S/C21H25BrN2O3/c1-3-26-19-10-16(17(22)11-20(19)27-4-2)13-24-12-15-8-6-5-7-14(15)9-18(24)21(23)25/h5-8,10-11,18H,3-4,9,12-13H2,1-2H3,(H2,23,25)	432.105	2-[(2-bromo-4,5-diethoxy-phenyl)methyl]-3,4-dihydro-1H-isoquinoline-3-carboxamide	17469102	C21H25BrN2O3	NA	2.6565741466812054	NA	11	0
0.0	0.1638	InChI=1S/C21H25BrN2O3/c1-14-12-19(18-3-2-15(22)13-20(18)23-14)21(25)24-8-4-16(5-9-24)27-17-6-10-26-11-7-17/h2-3,12-13,16-17H,4-11H2,1H3	432.105	(7-bromo-2-methyl-4-quinolyl)-(4-tetrahydropyran-4-yloxy-1-piperidyl)methanone	99809928	C21H25BrN2O3	NA	2.656613235845231	NA	11	0
11.349994875254652	0.1637	InChI=1S/C21H25BrN2O3/c1-21(2,3)23-20(27)19(15-6-5-7-17(25)13-15)24(4)18(26)12-14-8-10-16(22)11-9-14/h5-11,13,19,25H,12H2,1-4H3,(H,23,27)/t19-/m0/s1	432.105	(2S)-2-[[2-(4-bromophenyl)acetyl]-methyl-amino]-N-tert-butyl-2-(3-hydroxyphenyl)acetamide	51772249	C21H25BrN2O3	205.073:[C11H12NO3]-H-	1.8393432179004454	205.073_113.5	11	1
11.349994875254652	0.1637	InChI=1S/C21H25BrN2O3/c1-21(2,3)23-20(27)19(15-7-11-17(25)12-8-15)24(4)18(26)13-14-5-9-16(22)10-6-14/h5-12,19,25H,13H2,1-4H3,(H,23,27)/t19-/m0/s1	432.105	(2S)-2-[[2-(4-bromophenyl)acetyl]-methyl-amino]-N-tert-butyl-2-(4-hydroxyphenyl)acetamide	51772257	C21H25BrN2O3	205.073:[C11H12NO3]-H-	1.8393432179004454	205.073_113.5	11	1
0.0	0.1637	InChI=1S/C21H25BrN2O3/c1-26-19-7-5-16(6-8-19)14-23-20(25)15-24-21(9-11-27-12-10-21)17-3-2-4-18(22)13-17/h2-8,13,24H,9-12,14-15H2,1H3,(H,23,25)	432.105	2-[[4-(3-bromophenyl)tetrahydropyran-4-yl]amino]-N-[(4-methoxyphenyl)methyl]acetamide	56012937	C21H25BrN2O3	NA	2.654447316208003	NA	11	0
8.164408682720692	0.1633	InChI=1S/C21H25BrN2O3/c1-5-10-23-21(26)17-8-6-7-9-18(17)24-20(25)15(4)27-19-13(2)11-16(22)12-14(19)3/h6-9,11-12,15H,5,10H2,1-4H3,(H,23,26)(H,24,25)	432.105	2-[2-(4-bromo-2,6-dimethyl-phenoxy)propanoylamino]-N-propyl-benzamide	4961077	C21H25BrN2O3	205.073:[C11H10NO3+H]-	2.0627409875930285	205.073_113.5	11	1
1.5398757284240907	0.1628	InChI=1S/C21H25BrN2O3/c1-16-11-19(5-6-20(16)22)27-15-21(25)23-13-17-3-2-4-18(12-17)14-24-7-9-26-10-8-24/h2-6,11-12H,7-10,13-15H2,1H3,(H,23,25)	432.105	2-(4-bromo-3-methyl-phenoxy)-N-[[3-(morpholinomethyl)phenyl]methyl]acetamide	100469191	C21H25BrN2O3	59.0128:[C2H3O2]-	2.530037285697594	59.0128_188.8	11	1
1.5398757284240907	0.1628	InChI=1S/C21H25BrN2O3/c1-16-12-19(6-7-20(16)22)27-15-21(25)23-13-17-2-4-18(5-3-17)14-24-8-10-26-11-9-24/h2-7,12H,8-11,13-15H2,1H3,(H,23,25)	432.105	2-(4-bromo-3-methyl-phenoxy)-N-[[4-(morpholinomethyl)phenyl]methyl]acetamide	100439696	C21H25BrN2O3	59.0128:[C2H3O2]-	2.530037285697594	59.0128_188.8	11	1
8.37679663092799	0.1628	InChI=1S/C22H19ClF2N2O3/c1-12-10-26(11-13(2)30-12)20-19(14-3-5-15(24)6-4-14)21(28)27(22(20)29)16-7-8-18(25)17(23)9-16/h3-9,12-13H,10-11H2,1-2H3	432.105	1-(3-chloro-4-fluoro-phenyl)-3-(2,6-dimethylmorpholin-4-yl)-4-(4-fluorophenyl)pyrrole-2,5-dione	110545141	C22H19ClF2N2O3	205.073:[C11H12NO3]-H-	2.038402934430912	205.073_113.5	11	1
1.5398757284240907	0.1628	InChI=1S/C21H25BrN2O3/c1-16-2-7-20(19(22)12-16)27-15-21(25)23-13-17-3-5-18(6-4-17)14-24-8-10-26-11-9-24/h2-7,12H,8-11,13-15H2,1H3,(H,23,25)	432.105	2-(2-bromo-4-methyl-phenoxy)-N-[[4-(morpholinomethyl)phenyl]methyl]acetamide	17499590	C21H25BrN2O3	59.0128:[C2H3O2]-	2.530037285697594	59.0128_188.8	11	1
10.962460087022695	0.1627	InChI=1S/C18H20N6O3S2/c1-4-14(16(25)19-17-22-20-10(3)28-17)29-18-23-21-15(24(18)5-2)11-6-7-12-13(8-11)27-9-26-12/h6-8,14H,4-5,9H2,1-3H3,(H,19,22,25)/t14-/m0/s1	432.104	(2S)-2-[[5-(1,3-benzodioxol-5-yl)-4-ethyl-1,2,4-triazol-3-yl]sulfanyl]-N-(5-methyl-1,3,4-thiadiazol-2-yl)butanamide	25806476	C18H20N6O3S2	59.0128:[C2H2O2+H]-;191.0196:[C5H7N3OS2+2H]-	1.8516263894127285	59.0128_188.8;191.0196_169.7	11	2
11.366686141832925	0.1626	InChI=1S/C21H25BrN2O3/c1-14-11-15(22)6-9-18(14)23-21(25)13-24-10-4-5-19(24)17-8-7-16(26-2)12-20(17)27-3/h6-9,11-12,19H,4-5,10,13H2,1-3H3,(H,23,25)	432.105	N-(4-bromo-2-methyl-phenyl)-2-[2-(2,4-dimethoxyphenyl)pyrrolidin-1-yl]acetamide	55411017	C21H25BrN2O3	205.073:[C11H12NO3]-H-	1.821591663001722	205.073_113.5	11	1
11.134523628572078	0.1625	InChI=1S/C21H25BrN2O3/c1-13(25)24-11-10-21(2,3)18-19(24)17(26-4)12-16(20(18)27-5)23-15-9-7-6-8-14(15)22/h6-9,12,23H,10-11H2,1-5H3	432.105	1-[6-(2-bromoanilino)-5,8-dimethoxy-4,4-dimethyl-2,3-dihydroquinolin-1-yl]ethanone	101800915	C21H25BrN2O3	205.073:[C11H12NO3]-H-	1.8362504137765285	205.073_113.5	11	1
9.620858537544315	0.1625	InChI=1S/C21H25BrN2O3/c1-14(15-6-4-7-16(22)12-15)23-21(25)24-11-5-8-19(24)18-10-9-17(26-2)13-20(18)27-3/h4,6-7,9-10,12-14,19H,5,8,11H2,1-3H3,(H,23,25)	432.105	N-[1-(3-bromophenyl)ethyl]-2-(2,4-dimethoxyphenyl)pyrrolidine-1-carboxamide	60476100	C21H25BrN2O3	205.073:[C11H13NO3-H]-H-	1.94538842013693	205.073_113.5	11	1
1.7241610667556044	0.1625	InChI=1S/C21H25BrN2O3/c1-2-6-19(25)23-16-8-5-12-24(13-16)20(26)14-27-18-11-10-15-7-3-4-9-17(15)21(18)22/h3-4,7,9-11,16H,2,5-6,8,12-14H2,1H3,(H,23,25)/t16-/m0/s1	432.105	N-[(3S)-1-[2-[(1-bromo-2-naphthyl)oxy]acetyl]-3-piperidyl]butanamide	99376236	C21H25BrN2O3	59.0128:[C2H2O2+H]-	2.511946934278174	59.0128_188.8	11	1
0.0	0.1624	InChI=1S/C21H25BrN2O3/c1-5-6-13-7-12(2)24-20(26)16(13)11-23-19(25)14-8-15-10-21(3,4)27-18(15)17(22)9-14/h7-9H,5-6,10-11H2,1-4H3,(H,23,25)(H,24,26)	432.105	7-bromo-2,2-dimethyl-N-[(6-methyl-2-oxo-4-propyl-1H-pyridin-3-yl)methyl]-3H-benzofuran-5-carboxamide	118096713	C21H25BrN2O3	NA	2.633279864506592	NA	11	0
0.0	0.1622	InChI=1S/C20H15F3N4O4/c21-10-1-2-16(14(22)7-10)27-9-13(20(29)30)17(28)12-8-15(23)19(24-18(12)27)26-5-3-11(25-31)4-6-26/h1-2,7-9,31H,3-6H2,(H,29,30)	432.105	1-(2,4-difluorophenyl)-6-fluoro-7-(4-hydroxyimino-1-piperidyl)-4-oxo-1,8-naphthyridine-3-carboxylic acid	15165051	C20H15F3N4O4	NA	2.6305524767032455	NA	11	0
10.598563595020257	0.1621	InChI=1S/C19H20ClF3N2O4/c1-2-29-18(28)11-5-7-24(8-6-11)15-10-16(26)25(17(15)27)12-3-4-14(20)13(9-12)19(21,22)23/h3-4,9,11,15H,2,5-8,10H2,1H3/t15-/m1/s1	432.106	ethyl 1-[(3R)-1-[4-chloro-3-(trifluoromethyl)phenyl]-2,5-dioxo-pyrrolidin-3-yl]piperidine-4-carboxylate	92698722	C19H20ClF3N2O4	59.0128:[C2H2O2+H]-;191.0196:[C7H3F3NO2+H]-	1.868132245244872	59.0128_188.8;191.0196_169.7	11	2
13.05941065704062	0.1621	InChI=1S/C21H25BrN2O3/c1-3-11-8-15(22)9-12(4-2)19(11)23-16(25)10-24-20(26)17-13-5-6-14(7-13)18(17)21(24)27/h8-9,13-14,17-18H,3-7,10H2,1-2H3,(H,23,25)/t13-,14-,17+,18+/m0/s1	432.105	NA	98337308	C21H25BrN2O3	205.073:[C11H13NO3-H]-H-	1.692164395195328	205.073_113.5	11	1
13.610261276408536	0.1621	InChI=1S/C21H25BrN2O3/c1-4-5-12-27-18-9-6-16(7-10-18)21(26)24(3)14-20(25)23-19-11-8-17(22)13-15(19)2/h6-11,13H,4-5,12,14H2,1-3H3,(H,23,25)	432.105	N-[2-(4-bromo-2-methyl-anilino)-2-oxo-ethyl]-4-butoxy-N-methyl-benzamide	26904849	C21H25BrN2O3	205.073:[C11H11NO3]-	1.6515315058100764	205.073_113.5	11	1
10.858094475169286	0.162	InChI=1S/C21H25BrN2O3/c1-26-19-7-6-16(20(12-19)27-2)10-21(25)23-13-15-8-9-24(14-15)18-5-3-4-17(22)11-18/h3-7,11-12,15H,8-10,13-14H2,1-2H3,(H,23,25)/t15-/m1/s1	432.105	N-[[(3R)-1-(3-bromophenyl)pyrrolidin-3-yl]methyl]-2-(2,4-dimethoxyphenyl)acetamide	98937454	C21H25BrN2O3	205.073:[C11H12NO3]-H-	1.848617772174629	205.073_113.5	11	1
1.1899204479317167	0.1619	InChI=1S/C21H25BrN2O3/c1-2-25-18-7-5-16(22)13-17(18)21(24-10-3-8-23-9-11-24)15-4-6-19-20(12-15)27-14-26-19/h4-7,12-13,21,23H,2-3,8-11,14H2,1H3	432.105	1-[1,3-benzodioxol-5-yl-(5-bromo-2-ethoxy-phenyl)methyl]-1,4-diazepane	3600904	C21H25BrN2O3	59.0128:[C2H2O2+H]-	2.540330435853866	59.0128_188.8	11	1
1.5398757284240907	0.1619	InChI=1S/C21H25BrN2O3/c1-15-11-19(12-16(2)21(15)22)27-14-20(25)23-13-17-3-5-18(6-4-17)24-7-9-26-10-8-24/h3-6,11-12H,7-10,13-14H2,1-2H3,(H,23,25)	432.105	2-(4-bromo-3,5-dimethyl-phenoxy)-N-[(4-morpholinophenyl)methyl]acetamide	100027698	C21H25BrN2O3	59.0128:[C2H3O2]-	2.5148900351734986	59.0128_188.8	11	1
11.28944294669472	0.1617	InChI=1S/C21H25BrN2O3/c1-3-27-20-18(22)11-16(12-19(20)26-2)21(25)23-17-9-10-24(14-17)13-15-7-5-4-6-8-15/h4-8,11-12,17H,3,9-10,13-14H2,1-2H3,(H,23,25)	432.105	N-(1-benzylpyrrolidin-3-yl)-3-bromo-4-ethoxy-5-methoxy-benzamide	45752245	C21H25BrN2O3	205.073:[C11H12NO3]-H-	1.8115792892357334	205.073_113.5	11	1
11.349994875254652	0.1615	InChI=1S/C21H25BrN2O3/c1-21(2,3)23-20(27)19(16-7-5-6-8-17(16)25)24(4)18(26)13-14-9-11-15(22)12-10-14/h5-12,19,25H,13H2,1-4H3,(H,23,27)/t19-/m0/s1	432.105	(2S)-2-[[2-(4-bromophenyl)acetyl]-methyl-amino]-N-tert-butyl-2-(2-hydroxyphenyl)acetamide	51772311	C21H25BrN2O3	205.073:[C11H12NO3]-H-	1.803758908405735	205.073_113.5	11	1
13.398948923573215	0.1615	InChI=1S/C15H15F7N4O3/c1-7-9(16)2-8(12(28)24-5-14(17,18)19)3-10(7)23-4-11(27)26-13(29)25-6-15(20,21)22/h2-3,23H,4-6H2,1H3,(H,24,28)(H2,25,26,27,29)	432.103	3-fluoro-4-methyl-5-[[2-oxo-2-(2,2,2-trifluoroethylcarbamoylamino)ethyl]amino]-N-(2,2,2-trifluoroethyl)benzamide	56358245	C15H15F7N4O3	125.0244:[C4H5N3O2-H]-H-;205.073:[C9H8F3NO+2H]-	1.6575104219827446	125.0244_187.2;205.073_113.5	11	2
10.858094475169286	0.1613	InChI=1S/C21H25BrN2O3/c1-15(26-18-7-3-16(22)4-8-18)21(25)23-17-5-9-19(10-6-17)27-20-11-13-24(2)14-12-20/h3-10,15,20H,11-14H2,1-2H3,(H,23,25)/t15-/m0/s1	432.105	(2S)-2-(4-bromophenoxy)-N-[4-[(1-methyl-4-piperidyl)oxy]phenyl]propanamide	100045763	C21H25BrN2O3	205.073:[C11H12NO3]-H-	1.8362255022705278	205.073_113.5	11	1
10.336319501890925	0.161	InChI=1S/C21H25BrN2O3/c1-14(2)18-12-16(22)7-10-19(18)27-13-20(25)23-17-8-5-15(6-9-17)11-21(26)24(3)4/h5-10,12,14H,11,13H2,1-4H3,(H,23,25)	432.105	2-[4-[[2-(4-bromo-2-isopropyl-phenoxy)acetyl]amino]phenyl]-N,N-dimethyl-acetamide	37976764	C21H25BrN2O3	59.0128:[C2H2O2+H]-;205.073:[C11H9NO3+2H]-	1.86936591127514	59.0128_188.8;205.073_113.5	11	2
1.7880640744516691	0.1608	InChI=1S/C21H25BrN2O3/c1-16-3-2-4-20(13-16)27-15-19(25)14-23-9-11-24(12-10-23)21(26)17-5-7-18(22)8-6-17/h2-8,13,19,25H,9-12,14-15H2,1H3/t19-/m1/s1	432.105	(4-bromophenyl)-[4-[(2R)-2-hydroxy-3-(3-methylphenoxy)propyl]piperazin-1-yl]methanone	28100886	C21H25BrN2O3	59.0128:[C2H4O2]-H-	2.478813309558936	59.0128_188.8	11	1
12.728640444810692	0.1607	InChI=1S/C21H25BrN2O3/c1-14-11-18(26-2)19(27-3)13-17(14)23-21(25)20(24-9-4-5-10-24)15-7-6-8-16(22)12-15/h6-8,11-13,20H,4-5,9-10H2,1-3H3,(H,23,25)/t20-/m0/s1	432.105	(2S)-2-(3-bromophenyl)-N-(4,5-dimethoxy-2-methyl-phenyl)-2-pyrrolidin-1-yl-acetamide	95784767	C21H25BrN2O3	205.073:[C11H13NO3-H]-H-	1.6927482002183167	205.073_113.5	11	1
11.990306882761818	0.1607	InChI=1S/C23H17FN4O2S/c24-19-7-2-1-6-18(19)23-28-20(14-31-23)22(30)26-13-15-4-3-5-16(12-15)21(29)27-17-8-10-25-11-9-17/h1-12,14H,13H2,(H,26,30)(H,25,27,29)	432.106	2-(2-fluorophenyl)-N-[[3-(4-pyridylcarbamoyl)phenyl]methyl]thiazole-4-carboxamide	72134336	C23H17FN4O2S	191.0196:[C10H5FNS+H]-	1.7457928590737968	191.0196_169.7	11	1
10.355653762685526	0.1605	InChI=1S/C18H20N6O3S2/c1-23-14-12(16(26)24(2)18(23)27)15(22-13(21-14)10-5-3-4-6-10)29-9-11(25)20-17-19-7-8-28-17/h7-8,10H,3-6,9H2,1-2H3,(H,19,20,25)	432.104	2-(7-cyclopentyl-1,3-dimethyl-2,4-dioxo-pyrimido[4,5-d]pyrimidin-5-yl)sulfanyl-N-thiazol-2-yl-acetamide	22581530	C18H20N6O3S2	205.073:[C9H7N4O2+2H]-	1.8591865947694728	205.073_113.5	11	1
1.5398757284240907	0.1601	InChI=1S/C21H25BrN2O3/c1-2-16-5-8-20(19(22)13-16)27-15-21(25)23-14-17-3-6-18(7-4-17)24-9-11-26-12-10-24/h3-8,13H,2,9-12,14-15H2,1H3,(H,23,25)	432.105	2-(2-bromo-4-ethyl-phenoxy)-N-[(4-morpholinophenyl)methyl]acetamide	100028388	C21H25BrN2O3	59.0128:[C2H3O2]-	2.485273402670527	59.0128_188.8	11	1
11.366686141832925	0.1601	InChI=1S/C21H25BrN2O3/c1-13-10-15(22)11-14(2)20(13)23-21(25)24-9-5-6-18(24)17-12-16(26-3)7-8-19(17)27-4/h7-8,10-12,18H,5-6,9H2,1-4H3,(H,23,25)	432.105	N-(4-bromo-2,6-dimethyl-phenyl)-2-(2,5-dimethoxyphenyl)pyrrolidine-1-carboxamide	60455317	C21H25BrN2O3	205.073:[C11H12NO3]-H-	1.7806655731431151	205.073_113.5	11	1
11.349994875254652	0.16	InChI=1S/C21H25BrN2O3/c1-12(2)10-18(19(25)23-17-9-8-13(3)11-16(17)22)24-20(26)14-6-4-5-7-15(14)21(24)27/h4-5,8-9,11-12,14-15,18H,6-7,10H2,1-3H3,(H,23,25)/t14-,15+,18-/m0/s1	432.105	(2S)-2-[(3aR,7aS)-1,3-dioxo-3a,4,7,7a-tetrahydroisoindol-2-yl]-N-(2-bromo-4-methyl-phenyl)-4-methyl-pentanamide	92478447	C21H25BrN2O3	205.073:[C11H12NO3]-H-	1.7807857947749668	205.073_113.5	11	1
11.349994875254652	0.16	InChI=1S/C21H25BrN2O3/c1-12(2)10-18(19(25)23-14-9-8-13(3)17(22)11-14)24-20(26)15-6-4-5-7-16(15)21(24)27/h4-5,8-9,11-12,15-16,18H,6-7,10H2,1-3H3,(H,23,25)/t15-,16+,18-/m0/s1	432.105	(2S)-2-[(3aR,7aS)-1,3-dioxo-3a,4,7,7a-tetrahydroisoindol-2-yl]-N-(3-bromo-4-methyl-phenyl)-4-methyl-pentanamide	98629890	C21H25BrN2O3	205.073:[C11H12NO3]-H-	1.7807857947749668	205.073_113.5	11	1
0.0	0.1599	InChI=1S/C25H18ClFN2O2/c26-18-9-11-22(30-15-16-5-2-1-3-6-16)17(13-18)14-19-10-12-23(31-19)25-28-21-8-4-7-20(27)24(21)29-25/h1-13H,14-15H2,(H,28,29)	432.104	2-[5-[(2-benzyloxy-5-chloro-phenyl)methyl]-2-furyl]-4-fluoro-1H-benzimidazole	59845909	C25H18ClFN2O2	NA	2.592009923717871	NA	11	0
10.916575513347444	0.1598	InChI=1S/C21H25BrN2O3/c1-14-19(26-2)9-16(10-20(14)27-3)21(25)23-12-15-7-8-24(13-15)18-6-4-5-17(22)11-18/h4-6,9-11,15H,7-8,12-13H2,1-3H3,(H,23,25)/t15-/m1/s1	432.105	N-[[(3R)-1-(3-bromophenyl)pyrrolidin-3-yl]methyl]-3,5-dimethoxy-4-methyl-benzamide	98937627	C21H25BrN2O3	205.073:[C11H12NO3]-H-	1.807263687767166	205.073_113.5	11	1
9.522399441210343	0.1596	InChI=1S/C21H25BrN2O3/c1-2-19(17-10-12-18(22)13-11-17)24-20(25)9-6-14-23-21(26)27-15-16-7-4-3-5-8-16/h3-5,7-8,10-13,19H,2,6,9,14-15H2,1H3,(H,23,26)(H,24,25)/t19-/m1/s1	432.105	benzyl N-[4-[[(1R)-1-(4-bromophenyl)propyl]amino]-4-oxo-butyl]carbamate	98845041	C21H25BrN2O3	59.0128:[C2H3O2]-;205.073:[C11H14NO3-2H]-H-	1.9042481710078625	59.0128_188.8;205.073_113.5	11	2
13.494272761167883	0.1594	InChI=1S/C21H25BrN2O3/c1-14(2)27-19-8-6-5-7-16(19)12-21(26)24(4)13-20(25)23-18-10-9-17(22)11-15(18)3/h5-11,14H,12-13H2,1-4H3,(H,23,25)	432.105	N-[2-(4-bromo-2-methyl-anilino)-2-oxo-ethyl]-2-(2-isopropoxyphenyl)-N-methyl-acetamide	99316068	C21H25BrN2O3	205.073:[C11H11NO3]-	1.6158032814777081	205.073_113.5	11	1
3.8782358677653583	0.1591	InChI=1S/C22H19ClF2N2O3/c1-13-15-5-2-3-6-18(15)27-19(21(13)23)12-30-20(28)7-4-10-26-22(29)16-9-8-14(24)11-17(16)25/h2-3,5-6,8-9,11H,4,7,10,12H2,1H3,(H,26,29)	432.105	(3-chloro-4-methyl-2-quinolyl)methyl 4-[(2,4-difluorobenzoyl)amino]butanoate	55375712	C22H19ClF2N2O3	59.0128:[C2H2O2+H]-;100.9666:[C3H2ClNO-H]-H-	2.3012992269257	59.0128_188.8;100.9666_99.2	11	2
1.7241610667556044	0.1589	InChI=1S/C21H25BrN2O3/c1-15-4-7-18(8-5-15)24-21(25)14-27-20-9-6-17(22)11-16(20)12-23-13-19-3-2-10-26-19/h4-9,11,19,23H,2-3,10,12-14H2,1H3,(H,24,25)/t19-/m1/s1	432.105	2-[4-bromo-2-[[[(2R)-tetrahydrofuran-2-yl]methylamino]methyl]phenoxy]-N-(p-tolyl)acetamide	51994170	C21H25BrN2O3	59.0128:[C2H2O2+H]-	2.453538536386582	59.0128_188.8	11	1
1.5398757284240907	0.1588	InChI=1S/C21H25BrN2O3/c1-16-2-4-17(5-3-16)20(24-10-12-26-13-11-24)14-23-21(25)15-27-19-8-6-18(22)7-9-19/h2-9,20H,10-15H2,1H3,(H,23,25)/t20-/m0/s1	432.105	2-(4-bromophenoxy)-N-[(2R)-2-morpholino-2-(p-tolyl)ethyl]acetamide	34952828	C21H25BrN2O3	59.0128:[C2H3O2]-	2.4646268116389156	59.0128_188.8	11	1
0.0	0.1586	InChI=1S/C21H25BrN2O3/c1-16-3-2-4-19(13-16)26-11-9-23-21(25)15-24-10-12-27-20(14-24)17-5-7-18(22)8-6-17/h2-8,13,20H,9-12,14-15H2,1H3,(H,23,25)/t20-/m1/s1	432.105	2-[(2S)-2-(4-bromophenyl)morpholin-4-yl]-N-[2-(3-methylphenoxy)ethyl]acetamide	52759389	C21H25BrN2O3	NA	2.572502181758069	NA	11	0
1.5398757284240907	0.1585	InChI=1S/C21H25BrN2O3/c1-16-2-4-17(5-3-16)20(14-24-10-12-26-13-11-24)23-21(25)15-27-19-8-6-18(22)7-9-19/h2-9,20H,10-15H2,1H3,(H,23,25)/t20-/m0/s1	432.105	2-(4-bromophenoxy)-N-[(1R)-2-morpholino-1-(p-tolyl)ethyl]acetamide	25496035	C21H25BrN2O3	59.0128:[C2H3O2]-	2.4600533897400743	59.0128_188.8	11	1
1.5398757284240907	0.1585	InChI=1S/C21H25BrN2O3/c1-16-5-7-17(8-6-16)20(14-24-9-11-26-12-10-24)23-21(25)15-27-19-4-2-3-18(22)13-19/h2-8,13,20H,9-12,14-15H2,1H3,(H,23,25)	432.105	2-(3-bromophenoxy)-N-[2-morpholino-1-(p-tolyl)ethyl]acetamide	45837272	C21H25BrN2O3	59.0128:[C2H3O2]-	2.4600533897400743	59.0128_188.8	11	1
8.164408682720692	0.1583	InChI=1S/C21H25BrN2O3/c1-12(2)23-21(26)16-7-6-8-18(11-16)24-20(25)15(5)27-19-13(3)9-17(22)10-14(19)4/h6-12,15H,1-5H3,(H,23,26)(H,24,25)	432.105	3-[2-(4-bromo-2,6-dimethyl-phenoxy)propanoylamino]-N-isopropyl-benzamide	17197492	C21H25BrN2O3	205.073:[C11H10NO3+H]-	1.980323352918764	205.073_113.5	11	1
2.656304047991885	0.158	InChI=1S/C22H19ClF2N2O3/c1-27(13-21(28)29)20-8-6-15(12-26-20)9-14-5-7-19(30-22(24)25)18(10-14)16-3-2-4-17(23)11-16/h2-8,10-12,22H,9,13H2,1H3,(H,28,29)	432.105	2-[[5-[[3-(3-chlorophenyl)-4-(difluoromethoxy)phenyl]methyl]-2-pyridyl]-methyl-amino]acetic acid	68653393	C22H19ClF2N2O3	59.0128:[C2H3O2]-	2.3715129857444817	59.0128_188.8	11	1
9.491231293376302	0.158	InChI=1S/C21H25BrN2O3/c1-4-27-16-7-9-20(10-8-16)12-14-5-6-15(22)11-17(14)21(20)18(25)24(13(2)3)19(26)23-21/h4-6,11,13,16H,1,7-10,12H2,2-3H3,(H,23,26)	432.105	NA	117692009	C21H25BrN2O3	205.073:[C11H13NO3-H]-H-	1.8817055705637185	205.073_113.5	11	1
10.916575513347444	0.1577	InChI=1S/C21H25BrN2O3/c1-15(27-20-8-6-19(26-2)7-9-20)21(25)23-13-16-10-11-24(14-16)18-5-3-4-17(22)12-18/h3-9,12,15-16H,10-11,13-14H2,1-2H3,(H,23,25)/t15-,16-/m1/s1	432.105	(2R)-N-[[(3R)-1-(3-bromophenyl)pyrrolidin-3-yl]methyl]-2-(4-methoxyphenoxy)propanamide	99215187	C21H25BrN2O3	205.073:[C11H12NO3]-H-	1.7743012150440491	205.073_113.5	11	1
15.302530930677877	0.1574	InChI=1S/C21H25BrN2O3/c1-3-24(4-2)13-14-27-21(26)17-7-11-19(12-8-17)23-20(25)15-16-5-9-18(22)10-6-16/h5-12H,3-4,13-15H2,1-2H3,(H,23,25)	432.105	2-(diethylamino)ethyl 4-[[2-(4-bromophenyl)acetyl]amino]benzoate	84380301	C21H25BrN2O3	59.0128:[C2H2O2+H]-;205.073:[C11H11NO3]-	1.454671739393866	59.0128_188.8;205.073_113.5	11	2
0.0	0.1571	InChI=1S/C25H20O5S/c1-29-20-12-8-17(9-13-20)16-22-23(19-10-14-21(15-11-19)31(2,27)28)24(25(26)30-22)18-6-4-3-5-7-18/h3-16H,1-2H3/b22-16-	432.103	(5Z)-5-[(4-methoxyphenyl)methylene]-4-(4-methylsulfonylphenyl)-3-phenyl-furan-2-one	71740346	C25H20O5S	NA	2.548089267904412	NA	11	0
4.601181678201326	0.1571	InChI=1S/C20H15F3N4O4/c21-20(22,23)19(30)31-18(29)11-5-6-12-13(7-11)26-17(25-12)15-8-10-3-1-2-4-14(10)27(15)16(28)9-24/h1-7,15H,8-9,24H2,(H,25,26)	432.105	(2,2,2-trifluoroacetyl) 2-[1-(2-aminoacetyl)indolin-2-yl]-3H-benzimidazole-5-carboxylate	87287952	C20H15F3N4O4	125.0244:[C6H3O3+2H]-	2.2166280675384686	125.0244_187.2	11	1
8.856716596065219	0.157	InChI=1S/C21H25BrN2O3/c1-4-24(14-16-8-6-5-7-9-16)20(25)13-23-21(26)18-11-10-17(22)12-19(18)27-15(2)3/h5-12,15H,4,13-14H2,1-3H3,(H,23,26)	432.105	N-[2-[benzyl(ethyl)amino]-2-oxo-ethyl]-4-bromo-2-isopropoxy-benzamide	56059475	C21H25BrN2O3	205.073:[C11H13NO3-H]-H-	1.910103284603716	205.073_113.5	11	1
10.253087156509164	0.157	InChI=1S/C21H25BrN2O3/c1-26-18-12-15(17(22)14-19(18)27-2)13-21(25)24-11-7-6-10-20(24)23-16-8-4-3-5-9-16/h6-7,10-12,14,16H,3-5,8-9,13H2,1-2H3	432.105	2-(2-bromo-4,5-dimethoxy-phenyl)-1-(2-cyclohexylimino-1-pyridyl)ethanone	16582677	C21H25BrN2O3	205.073:[C11H11NO3]-	1.8104644319487782	205.073_113.5	11	1
0.0	0.157	InChI=1S/C21H25BrN2O3/c1-26-21-8-7-17(13-18(21)22)20(25)15-23-14-19(16-5-3-2-4-6-16)24-9-11-27-12-10-24/h2-8,13,19,23H,9-12,14-15H2,1H3	432.105	1-(3-bromo-4-methoxy-phenyl)-2-[(2-morpholino-2-phenyl-ethyl)amino]ethanone	110826091	C21H25BrN2O3	NA	2.5453483113844504	NA	11	0
1.5398757284240907	0.1569	InChI=1S/C21H25BrN2O3/c22-18-8-6-17-14-19(9-7-16(17)13-18)27-15-20(25)23-10-4-12-24-11-3-1-2-5-21(24)26/h6-9,13-14H,1-5,10-12,15H2,(H,23,25)	432.105	2-[(6-bromo-2-naphthyl)oxy]-N-[3-(2-oxoazepan-1-yl)propyl]acetamide	60465092	C21H25BrN2O3	59.0128:[C2H3O2]-	2.4340759157898098	59.0128_188.8	11	1
1.5398757284240907	0.1569	InChI=1S/C21H25BrN2O3/c22-21-17-8-4-3-7-16(17)10-11-18(21)27-15-19(25)23-12-6-14-24-13-5-1-2-9-20(24)26/h3-4,7-8,10-11H,1-2,5-6,9,12-15H2,(H,23,25)	432.105	2-[(1-bromo-2-naphthyl)oxy]-N-[3-(2-oxoazepan-1-yl)propyl]acetamide	60367694	C21H25BrN2O3	59.0128:[C2H3O2]-	2.4340759157898098	59.0128_188.8	11	1
1.7241610667556044	0.1567	InChI=1S/C21H25BrN2O3/c1-14(2)21(26)23-18-7-9-24(10-8-18)20(25)13-27-19-6-4-15-11-17(22)5-3-16(15)12-19/h3-6,11-12,14,18H,7-10,13H2,1-2H3,(H,23,26)	432.105	N-[1-[2-[(6-bromo-2-naphthyl)oxy]acetyl]-4-piperidyl]-2-methyl-propanamide	99493214	C21H25BrN2O3	59.0128:[C2H2O2+H]-	2.4170849710342597	59.0128_188.8	11	1
1.7241610667556044	0.1567	InChI=1S/C21H25BrN2O3/c1-14(2)21(26)23-18-4-3-9-24(12-18)20(25)13-27-19-8-6-15-10-17(22)7-5-16(15)11-19/h5-8,10-11,14,18H,3-4,9,12-13H2,1-2H3,(H,23,26)/t18-/m0/s1	432.105	N-[(3S)-1-[2-[(6-bromo-2-naphthyl)oxy]acetyl]-3-piperidyl]-2-methyl-propanamide	99075506	C21H25BrN2O3	59.0128:[C2H2O2+H]-	2.4172308278235715	59.0128_188.8	11	1
9.206886003183637	0.1566	InChI=1S/C21H25BrN2O3/c1-26-18-11-17(12-19(27-2)20(18)22)21(25)23-13-15-5-7-16(8-6-15)14-24-9-3-4-10-24/h5-8,11-12H,3-4,9-10,13-14H2,1-2H3,(H,23,25)	432.105	4-bromo-3,5-dimethoxy-N-[[4-(pyrrolidin-1-ylmethyl)phenyl]methyl]benzamide	17502282	C21H25BrN2O3	205.073:[C11H11NO3]-	1.878180943018116	205.073_113.5	11	1
9.206886003183637	0.1566	InChI=1S/C21H25BrN2O3/c1-26-18-11-17(12-19(27-2)20(18)22)21(25)23-13-15-7-3-4-8-16(15)14-24-9-5-6-10-24/h3-4,7-8,11-12H,5-6,9-10,13-14H2,1-2H3,(H,23,25)	432.105	4-bromo-3,5-dimethoxy-N-[[2-(pyrrolidin-1-ylmethyl)phenyl]methyl]benzamide	24504921	C21H25BrN2O3	205.073:[C11H11NO3]-	1.878180943018116	205.073_113.5	11	1
1.6922696542693398	0.1565	InChI=1S/C20H15F3N4O4/c1-3-15-25-16(30-27-15)9-29-19(28)12-8-14(24-18-17(12)10(2)26-31-18)11-6-4-5-7-13(11)20(21,22)23/h4-8H,3,9H2,1-2H3	432.105	(3-ethyl-1,2,4-oxadiazol-5-yl)methyl 3-methyl-6-[2-(trifluoromethyl)phenyl]isoxazolo[5,4-b]pyridine-4-carboxylate	55539511	C20H15F3N4O4	59.0128:[C2H2O2+H]-	2.4160509480638237	59.0128_188.8	11	1
8.61215843513532	0.1562	InChI=1S/C21H25BrN2O3/c1-15(2)20(27-18-12-8-7-11-17(18)22)21(26)23-13-19(25)24(3)14-16-9-5-4-6-10-16/h4-12,15,20H,13-14H2,1-3H3,(H,23,26)/t20-/m1/s1	432.105	(2R)-N-[2-[benzyl(methyl)amino]-2-oxo-ethyl]-2-(2-bromophenoxy)-3-methyl-butanamide	99530752	C21H25BrN2O3	205.073:[C11H14NO3-2H]-H-	1.9148776356184738	205.073_113.5	11	1
9.733995018301881	0.1562	InChI=1S/C20H17ClF2N5O2/c21-27-28-26-11-14-3-1-13(2-4-14)10-24-19(29)18-9-16(23)12-25-20(18)30-17-7-5-15(22)6-8-17/h1-9,12,27-28H,10-11H2,(H,24,29)/q-1	432.104	(2-chlorohydrazino)-[[4-[[[5-fluoro-2-(4-fluorophenoxy)pyridine-3-carbonyl]amino]methyl]phenyl]methyl]azanide	59106062	C20H17ClF2N5O2	191.0196:[C10H5F2NO-H]-H-	1.8350843106306147	191.0196_169.7	11	1
0.0	0.1562	InChI=1S/C21H25BrN2O3/c1-14-12-23-18(15(2)19(14)26-3)13-24-20(25)21(8-10-27-11-9-21)16-4-6-17(22)7-5-16/h4-7,12H,8-11,13H2,1-3H3,(H,24,25)	432.105	4-(4-bromophenyl)-N-[(4-methoxy-3,5-dimethyl-2-pyridyl)methyl]tetrahydropyran-4-carboxamide	56341819	C21H25BrN2O3	NA	2.5333657825638154	NA	11	0
12.123900546644851	0.156	InChI=1S/C22H19ClF2N2O3/c23-16-6-3-14(4-7-16)12-27(13-17-2-1-9-29-17)22(28)20-11-21(30-26-20)15-5-8-18(24)19(25)10-15/h3-8,10-11,17H,1-2,9,12-13H2/t17-/m1/s1	432.105	N-[(4-chlorophenyl)methyl]-5-(3,4-difluorophenyl)-N-[[(2R)-tetrahydrofuran-2-yl]methyl]isoxazole-3-carboxamide	52078028	C22H19ClF2N2O3	191.0196:[C10H4F2NO]-H-	1.6595841451661884	191.0196_169.7	11	1
9.620858537544315	0.156	InChI=1S/C21H25BrN2O3/c1-14(15-6-4-7-16(22)12-15)23-21(25)24-11-5-8-19(24)18-13-17(26-2)9-10-20(18)27-3/h4,6-7,9-10,12-14,19H,5,8,11H2,1-3H3,(H,23,25)/t14-,19+/m1/s1	432.105	(2S)-N-[(1R)-1-(3-bromophenyl)ethyl]-2-(2,5-dimethoxyphenyl)pyrrolidine-1-carboxamide	52653912	C21H25BrN2O3	205.073:[C11H13NO3-H]-H-	1.8394731260079193	205.073_113.5	11	1
10.285033617145206	0.156	InChI=1S/C21H25BrN2O3/c1-14-13-19(15(2)24(14)18-5-3-17(22)4-6-18)20(25)23-9-7-16(8-10-23)21-26-11-12-27-21/h3-6,13,16,21H,7-12H2,1-2H3	432.105	[1-(4-bromophenyl)-2,5-dimethyl-pyrrol-3-yl]-[4-(1,3-dioxolan-2-yl)-1-piperidyl]methanone	56404881	C21H25BrN2O3	59.0128:[C2H4O2]-H-;205.073:[C11H14NO3-2H]-H-	1.792231147143713	59.0128_188.8;205.073_113.5	11	2
10.285033617145206	0.156	InChI=1S/C21H25BrN2O3/c1-14-11-19(15(2)24(14)18-7-3-6-17(22)12-18)20(25)23-8-4-5-16(13-23)21-26-9-10-27-21/h3,6-7,11-12,16,21H,4-5,8-10,13H2,1-2H3	432.105	[1-(3-bromophenyl)-2,5-dimethyl-pyrrol-3-yl]-[3-(1,3-dioxolan-2-yl)-1-piperidyl]methanone	56494077	C21H25BrN2O3	59.0128:[C2H4O2]-H-;205.073:[C11H14NO3-2H]-H-	1.792231147143713	59.0128_188.8;205.073_113.5	11	2
10.285033617145206	0.156	InChI=1S/C21H25BrN2O3/c1-14-12-19(15(2)24(14)18-7-5-17(22)6-8-18)20(25)23-9-3-4-16(13-23)21-26-10-11-27-21/h5-8,12,16,21H,3-4,9-11,13H2,1-2H3	432.105	[1-(4-bromophenyl)-2,5-dimethyl-pyrrol-3-yl]-[3-(1,3-dioxolan-2-yl)-1-piperidyl]methanone	56547240	C21H25BrN2O3	59.0128:[C2H4O2]-H-;205.073:[C11H14NO3-2H]-H-	1.792231147143713	59.0128_188.8;205.073_113.5	11	2
9.620858537544315	0.156	InChI=1S/C21H25BrN2O3/c1-14(15-6-8-16(22)9-7-15)23-21(25)24-12-4-5-19(24)18-13-17(26-2)10-11-20(18)27-3/h6-11,13-14,19H,4-5,12H2,1-3H3,(H,23,25)/t14-,19+/m1/s1	432.105	(2S)-N-[(1R)-1-(4-bromophenyl)ethyl]-2-(2,5-dimethoxyphenyl)pyrrolidine-1-carboxamide	98822271	C21H25BrN2O3	205.073:[C11H13NO3-H]-H-	1.8394731260079193	205.073_113.5	11	1
10.285033617145206	0.156	InChI=1S/C21H25BrN2O3/c1-14-12-19(15(2)24(14)18-5-3-4-17(22)13-18)20(25)23-8-6-16(7-9-23)21-26-10-11-27-21/h3-5,12-13,16,21H,6-11H2,1-2H3	432.105	[1-(3-bromophenyl)-2,5-dimethyl-pyrrol-3-yl]-[4-(1,3-dioxolan-2-yl)-1-piperidyl]methanone	56404210	C21H25BrN2O3	59.0128:[C2H4O2]-H-;205.073:[C11H14NO3-2H]-H-	1.792231147143713	59.0128_188.8;205.073_113.5	11	2
1.7880640744516691	0.1559	InChI=1S/C21H25BrN2O3/c1-15(25)24-18-7-9-20(10-8-18)27-14-19(26)13-23-21(11-2-12-21)16-3-5-17(22)6-4-16/h3-10,19,23,26H,2,11-14H2,1H3,(H,24,25)	432.105	N-[4-[3-[[1-(4-bromophenyl)cyclobutyl]amino]-2-hydroxy-propoxy]phenyl]acetamide	60212555	C21H25BrN2O3	59.0128:[C2H4O2]-H-	2.3989844246757484	59.0128_188.8	11	1
1.7880640744516691	0.1559	InChI=1S/C21H25BrN2O3/c1-15(25)24-18-6-8-20(9-7-18)27-14-19(26)13-23-21(10-3-11-21)16-4-2-5-17(22)12-16/h2,4-9,12,19,23,26H,3,10-11,13-14H2,1H3,(H,24,25)/t19-/m0/s1	432.105	N-[4-[(2S)-3-[[1-(3-bromophenyl)cyclobutyl]amino]-2-hydroxy-propoxy]phenyl]acetamide	99429356	C21H25BrN2O3	59.0128:[C2H4O2]-H-	2.3989844246757484	59.0128_188.8	11	1
8.164408682720692	0.1558	InChI=1S/C21H25BrN2O3/c1-12(17-10-13-4-5-14(17)9-13)23-19(25)3-2-8-24-20(26)16-7-6-15(22)11-18(16)21(24)27/h6-7,11-14,17H,2-5,8-10H2,1H3,(H,23,25)	432.105	4-(5-bromo-1,3-dioxo-isoindolin-2-yl)-N-(1-norbornan-2-ylethyl)butanamide	46559725	C21H25BrN2O3	205.073:[C11H10NO3+H]-	1.9407202673587916	205.073_113.5	11	1
1.5398757284240907	0.1557	InChI=1S/C25H18ClFN2O2/c26-19-9-13-22(14-10-19)31-16-25(30)28-21-4-1-3-18(15-21)24-6-2-5-23(29-24)17-7-11-20(27)12-8-17/h1-15H,16H2,(H,28,30)	432.104	2-(4-chlorophenoxy)-N-[3-[6-(4-fluorophenyl)-2-pyridyl]phenyl]acetamide	46087676	C25H18ClFN2O2	59.0128:[C2H3O2]-	2.4140721868002384	59.0128_188.8	11	1
12.999581894453131	0.1557	InChI=1S/C18H20N6O3S2/c1-4-7-24-14(9-19-16(26)13-6-5-8-27-13)22-23-18(24)28-10-15(25)21-17-20-11(2)12(3)29-17/h4-6,8H,1,7,9-10H2,2-3H3,(H,19,26)(H,20,21,25)	432.104	N-[[4-allyl-5-[2-[(4,5-dimethylthiazol-2-yl)amino]-2-oxo-ethyl]sulfanyl-1,2,4-triazol-3-yl]methyl]furan-2-carboxamide	16486188	C18H20N6O3S2	205.073:[C9H8N4O2+H]-	1.5919517719238583	205.073_113.5	11	1
0.0	0.1556	InChI=1S/C21H25BrN2O3/c22-19-8-3-1-6-17(19)16-27-20-9-4-2-7-18(20)21(25)23-10-5-11-24-12-14-26-15-13-24/h1-4,6-9H,5,10-16H2,(H,23,25)	432.105	2-[(2-bromophenyl)methoxy]-N-(3-morpholinopropyl)benzamide	52432129	C21H25BrN2O3	NA	2.523795125269002	NA	11	0
0.0	0.1556	InChI=1S/C21H25BrN2O3/c22-18-6-3-5-17(15-18)16-27-20-8-2-1-7-19(20)21(25)23-9-4-10-24-11-13-26-14-12-24/h1-3,5-8,15H,4,9-14,16H2,(H,23,25)	432.105	2-[(3-bromophenyl)methoxy]-N-(3-morpholinopropyl)benzamide	99143499	C21H25BrN2O3	NA	2.523795125269002	NA	11	0
12.572779398300241	0.1556	InChI=1S/C14H20N6O8S/c1-14(2,3)27-12(22)17-16-11(21)10-9-7(5-15-18(9)4)8-6-19(10)13(23)20(8)28-29(24,25)26/h5,8,10H,6H2,1-4H3,(H,16,21)(H,17,22)(H,24,25,26)/t8-,10-/m0/s1	432.106	NA	77105191	C14H20N6O8S	205.073:[C9H9N4O2]-	1.6205459698806997	205.073_113.5	11	1
0.0	0.1556	InChI=1S/C21H25BrN2O3/c1-16-4-9-20(19(22)15-16)27-12-2-3-21(25)23-17-5-7-18(8-6-17)24-10-13-26-14-11-24/h4-9,15H,2-3,10-14H2,1H3,(H,23,25)	432.105	4-(2-bromo-4-methyl-phenoxy)-N-(4-morpholinophenyl)butanamide	19202682	C21H25BrN2O3	NA	2.522974207698119	NA	11	0
8.61215843513532	0.1555	InChI=1S/C21H25BrN2O3/c1-5-24(6-2)21(26)16-8-7-9-17(13-16)23-20(25)15(4)27-19-11-10-14(3)12-18(19)22/h7-13,15H,5-6H2,1-4H3,(H,23,25)	432.105	3-[2-(2-bromo-4-methyl-phenoxy)propanoylamino]-N,N-diethyl-benzamide	46525732	C21H25BrN2O3	205.073:[C11H9NO3+2H]-	1.9040054721718558	205.073_113.5	11	1
0.0	0.1554	InChI=1S/C21H25BrN2O3/c1-16(27-20-8-6-19(22)7-9-20)21(25)23-14-17-4-2-3-5-18(17)15-24-10-12-26-13-11-24/h2-9,16H,10-15H2,1H3,(H,23,25)	432.105	2-(4-bromophenoxy)-N-[[2-(morpholinomethyl)phenyl]methyl]propanamide	46613030	C21H25BrN2O3	NA	2.5194602930962784	NA	11	0
0.0	0.1554	InChI=1S/C21H25BrN2O3/c1-16(27-20-7-5-19(22)6-8-20)21(25)23-14-17-3-2-4-18(13-17)15-24-9-11-26-12-10-24/h2-8,13,16H,9-12,14-15H2,1H3,(H,23,25)/t16-/m0/s1	432.105	(2S)-2-(4-bromophenoxy)-N-[[3-(morpholinomethyl)phenyl]methyl]propanamide	100471019	C21H25BrN2O3	NA	2.5194602930962784	NA	11	0
0.0	0.1554	InChI=1S/C21H25BrN2O3/c1-16(27-20-8-6-19(22)7-9-20)21(25)23-14-17-2-4-18(5-3-17)15-24-10-12-26-13-11-24/h2-9,16H,10-15H2,1H3,(H,23,25)/t16-/m0/s1	432.105	(2S)-2-(4-bromophenoxy)-N-[[4-(morpholinomethyl)phenyl]methyl]propanamide	25564070	C21H25BrN2O3	NA	2.5194602930962784	NA	11	0
13.610261276408536	0.1554	InChI=1S/C21H25BrN2O3/c1-12(2)10-18(19(25)23-17-9-8-14(22)11-13(17)3)24-20(26)15-6-4-5-7-16(15)21(24)27/h4-5,8-9,11-12,15-16,18H,6-7,10H2,1-3H3,(H,23,25)/t15-,16+,18-/m0/s1	432.105	(2S)-2-[(3aS,7aR)-1,3-dioxo-3a,4,7,7a-tetrahydroisoindol-2-yl]-N-(4-bromo-2-methyl-phenyl)-4-methyl-pentanamide	51610795	C21H25BrN2O3	205.073:[C11H11NO3]-	1.543037785631302	205.073_113.5	11	1
13.610261276408536	0.1554	InChI=1S/C21H25BrN2O3/c1-12(2)10-18(19(25)23-14-8-9-17(22)13(3)11-14)24-20(26)15-6-4-5-7-16(15)21(24)27/h4-5,8-9,11-12,15-16,18H,6-7,10H2,1-3H3,(H,23,25)/t15-,16+,18-/m0/s1	432.105	(2S)-2-[(3aR,7aS)-1,3-dioxo-3a,4,7,7a-tetrahydroisoindol-2-yl]-N-(4-bromo-3-methyl-phenyl)-4-methyl-pentanamide	92482719	C21H25BrN2O3	205.073:[C11H11NO3]-	1.543037785631302	205.073_113.5	11	1
11.28398818404188	0.1552	InChI=1S/C21H25BrN2O3/c1-21(2,3)27-20(26)23-14-16(12-15-8-5-4-6-9-15)19(25)24-18-11-7-10-17(22)13-18/h4-11,13,16H,12,14H2,1-3H3,(H,23,26)(H,24,25)	432.105	tert-butyl N-[2-benzyl-3-(3-bromoanilino)-3-oxo-propyl]carbamate	59355021	C21H25BrN2O3	205.073:[C11H12NO3]-H-	1.7072364459627485	205.073_113.5	11	1
11.990306882761818	0.1552	InChI=1S/C23H17FN4O2S/c24-17-9-7-15(8-10-17)23-28-20(14-31-23)22(30)27-18-6-3-4-16(12-18)21(29)26-13-19-5-1-2-11-25-19/h1-12,14H,13H2,(H,26,29)(H,27,30)	432.106	2-(4-fluorophenyl)-N-[3-(2-pyridylmethylcarbamoyl)phenyl]thiazole-4-carboxamide	78885967	C23H17FN4O2S	191.0196:[C10H5FNS+H]-	1.6567550939282834	191.0196_169.7	11	1
0.0	0.1551	InChI=1S/C21H25BrN2O3/c1-16(27-19-9-7-18(22)8-10-19)21(25)23-20(17-5-3-2-4-6-17)15-24-11-13-26-14-12-24/h2-10,16,20H,11-15H2,1H3,(H,23,25)	432.105	2-(4-bromophenoxy)-N-(2-morpholino-1-phenyl-ethyl)propanamide	18166736	C21H25BrN2O3	NA	2.5143086930686436	NA	11	0
9.69767713968489	0.155	InChI=1S/C21H25BrN2O3/c1-14(2)17-10-9-16(11-15(17)3)27-13-21(26)24(4)12-20(25)23-19-8-6-5-7-18(19)22/h5-11,14H,12-13H2,1-4H3,(H,23,25)	432.105	N-(2-bromophenyl)-2-[[2-(4-isopropyl-3-methyl-phenoxy)acetyl]-methyl-amino]acetamide	26896461	C21H25BrN2O3	59.0128:[C2H2O2+H]-;205.073:[C11H14NO3-2H]-H-	1.8167640159818104	59.0128_188.8;205.073_113.5	11	2
9.69767713968489	0.155	InChI=1S/C21H25BrN2O3/c1-14(2)16-10-9-15(3)11-19(16)27-13-21(26)24(4)12-20(25)23-18-8-6-5-7-17(18)22/h5-11,14H,12-13H2,1-4H3,(H,23,25)	432.105	N-(2-bromophenyl)-2-[[2-(2-isopropyl-5-methyl-phenoxy)acetyl]-methyl-amino]acetamide	27800783	C21H25BrN2O3	59.0128:[C2H2O2+H]-;205.073:[C11H14NO3-2H]-H-	1.8167640159818104	59.0128_188.8;205.073_113.5	11	2
1.5398757284240907	0.155	InChI=1S/C21H25BrN2O3/c1-3-18(16-9-5-7-11-19(16)27-14-21(26)23-2)24-20(25)13-12-15-8-4-6-10-17(15)22/h4-11,18H,3,12-14H2,1-2H3,(H,23,26)(H,24,25)/t18-/m1/s1	432.105	3-(2-bromophenyl)-N-[(1R)-1-[2-[2-(methylamino)-2-oxo-ethoxy]phenyl]propyl]propanamide	99529266	C21H25BrN2O3	59.0128:[C2H3O2]-	2.4033101486756667	59.0128_188.8	11	1
0.0	0.1549	InChI=1S/C25H22O3P2/c26-30(27-22-13-5-1-6-14-22,28-23-15-7-2-8-16-23)21-29(24-17-9-3-10-18-24)25-19-11-4-12-20-25/h1-20H,21H2	432.104	[oxido(diphenoxy)phosphaniumyl]methyl-diphenyl-phosphane	102283880	C25H22O3P2	NA	2.5124719576176977	NA	11	0
9.206886003183637	0.1549	InChI=1S/C21H25BrN2O3/c1-14-10-16(24-8-4-5-9-24)6-7-18(14)23-21(25)12-15-11-19(26-2)20(27-3)13-17(15)22/h6-7,10-11,13H,4-5,8-9,12H2,1-3H3,(H,23,25)	432.105	2-(2-bromo-4,5-dimethoxy-phenyl)-N-(2-methyl-4-pyrrolidin-1-yl-phenyl)acetamide	16563385	C21H25BrN2O3	205.073:[C11H11NO3]-	1.8505288708945027	205.073_113.5	11	1
[truncated: 1,449 more rows]

## Sheet: 4_#821
MetFrag	Score	InChI	MonoisotopicMass	CompoundName	Identifier	MolecularFormula	FormulasOfExplPeaks	SpectralSimilarity	ExplPeaks	NumberPeaksUsed	NoExplPeaks
[truncated: 7 more rows]

## Sheet: 5_#821
Identifier	C16911
SpectralSimilarity	14.433977673888213
MonoisotopicMass	432.106
[truncated: 35 more rows]

## Sheet: 6_#821
Identifier	C01460
SpectralSimilarity	15.603779824011587
[truncated: 36 more rows]

## Sheet: 8_Vitexin
m/z	Abund	Abund %
[truncated: 100 more rows]

[truncated: 42 more sheets: 9_Vitexin, 10_Vitexin, 11_Vitexin, 12_Vitexin, 13_Vitexin, 14_#835, 15_#835, 16_#835, 17_#835, 18_#835, 19_Quercitrin, 20_Quercitrin, 21_Quercitrin, 22_Quercitrin, 23_Quercitrin, 24_Quercitrin, 25_#853, 26_#853, 27_#853, 28_#853 …]
