# Supplementary material for: Disentangling metabolic functions of bacteria in the honey bee gut
Source: PLoS Biol. 2017 Dec 12;15(12):e2003467. doi: 10.1371/journal.pbio.2003467 (PMC5726620; doi:10.1371/journal.pbio.2003467)
Supplement: S9 Data — (XLSX) [file pbio.2003467.s009.xlsx]

## Sheet: S9_Data
ionIdx	ionMz	ionAverageInt	ionQualTIC	Top annotation name	Top annotation ids	Top annotation formula	B.apis_log2FC	B.apis_pvalBH	B.asteroides_log2FC	B.asteroides_pvalBH	Firm4_log2FC	Firm4_pvalBH	Firm5_log2FC	Firm5_pvalBH	F.perrara_log2FC	F.perrara_pvalBH	G.apicola_log2FC	G.apicola_pvalBH	S.alvi_log2FC	S.alvi_pvalBH	ions_in_pollen
1	59.0134	7570.46	0.180709	Acetate; Glycolaldehyde	C00033; C00266	C2H4O2	0.00793147	0.991723	0.0364699	0.978328	-0.198244	0.378504	-1.03346	0.000938332	-0.72187	0.0008828	-0.535294	0.00019938	0.0681988	0.999213	-
2	70.0297	14404.8	-0.335904	Acrylamide	C01659	C3H5NO	0.00493722	0.994449	0.0135729	0.996863	0.0657111	0.92123	0.03316	0.602917	0.229394	0.0958416	0.247662	0.0656647	-0.139796	0.999213	-
3	71.0137	32652.2	-0.323022	Acrylic acid; Methylglyoxal; Glycidaldehyde; Propiolactone; Malonaldehyde	C00511; C00546; C19246; C19297; C19440	C3H4O2	-0.0914011	0.448063	-0.407634	0.760227	-0.211602	0.327944	-1.24903	0.00075109	-0.10782	0.320706	-0.260708	0.000270845	-0.177816	0.691432	-
4	71.05	1513.4	-0.211859	Butanal; Methyl ethyl ketone; 1,2-Epoxybutane	C01412; C02845; C19237	C4H8O	0.0603257	0.915783	0.211239	0.817588	0.557424	0.296276	0.0665977	0.692238	1.27497	0.000473674	0.643435	0.00151647	-0.0669519	0.999213	-
5	72.009	3240.38	-0.0349234	Iminoglycine	C15809	C2H3NO2	0.0332171	0.987896	-0.0204519	0.991685	0.102837	0.63153	-0.389286	0.0123292	0.0954155	0.727702	-0.0190061	0.763637	-0.0534989	0.999213	-
6	73.0291	5025.24	0.364217	Propanoate; (S)-Lactaldehyde; (R)-Lactaldehyde; 3-Hydroxypropanal; Hydroxya...	C00163; C00424; C00937; C00969; C05235; C05999; C10920; C17530	C3H6O2	0.0645169	0.960224	0.374138	0.671661	-0.101875	0.822452	0.16376	0.123673	-0.255365	0.229974	0.674662	0.000258121	-0.00398193	0.999213	-
7	74.0244	40039.6	0.266939	Glycine; Nitroethane; Acetohydroxamic acid; Methyl carbamate	C00037; C01837; C06808; C19445	C2H5NO2	-0.0224045	0.987896	-0.0164176	0.992589	0.173565	0.486898	0.167313	0.0939858	-0.134776	0.356746	-0.357776	0.00288698	-0.00952656	0.999213	-
8	75.0085	2353.9	0.140851	Glycolate	C00160	C2H4O3	0.280829	0.448063	-0.666084	0.605814	-0.0730901	0.890624	-0.316853	0.065922	0.0966423	0.622917	-0.231939	0.105219	0.329232	0.607121	-
9	85.0294	9001.65	0.374966	Diacetyl; gamma-Butyrolactone; 2-Butenoate; 2-Butyne-1,4-diol; Cyclopropane...	C00741; C01770; C01771; C02497; C16267; C16835; C19201; C19309; C19443	C4H6O2	0.0170652	0.987896	-0.154267	0.919434	-0.231189	0.109689	-1.34878	9.89187e-05	-1.4163	0.000236054	-1.58318	0.000352554	0.0847107	0.999213	-
10	87.0088	10373.9	0.308764	Pyruvate; 3-Oxopropanoate; 3-Hydroxypropenoate; Ethylene carbonate	C00022; C00222; C12069; C20363	C3H4O3	0.192327	0.239071	-0.142222	0.922851	-0.215226	0.128528	-0.902378	0.000588176	-0.408111	0.00876631	-1.12037	0.000171507	0.193867	0.334791	x
11	88.0404	57181.3	-0.293043	L-Alanine; beta-Alanine; D-Alanine; Sarcosine; Alanine; Urethane; 2-Nitropr...	C00041; C00099; C00133; C00213; C01401; C01537; C02116; C11488	C3H7NO2	-0.0123515	0.987896	-0.00588147	0.9979	-0.106319	0.533937	-0.137501	0.0781684	0.137114	0.192121	0.0883534	0.258104	-0.00337462	0.999213	-
12	89.0242	1781.71	0.0120735	Glycerone; (S)-Lactate; (R)-Lactate; D-Glyceraldehyde; 3-Hydroxypropanoate;...	C00184; C00186; C00256; C00577; C01013; C01432; C02154; C02426	C3H6O3	-0.122674	0.46575	0.0574828	0.967455	0.924354	0.0667131	1.33691	0.000684396	-2.13895	0.000599931	-0.822895	0.000239549	0.0779173	0.999213	-
13	94.9805	3670.7	0.569107	Methanesulfonic acid	C11145	CH4SO3	0.0619865	0.927816	-0.0070841	0.996863	0.0567065	0.933007	0.0639635	0.669457	-0.109737	0.273484	0.0138492	0.902001	0.00139068	0.999213	-
14	94.9907	2069.37	0.567333	Methylphosphonate	C20396	CH5O3P	0.0358839	0.987896	0.122253	0.599493	0.0782968	0.899491	0.0501983	0.763754	-0.114293	0.272686	0.0134003	0.884533	0.0100123	0.999213	-
15	95.0138	35320.8	0.50886	Protoanemonin; Furfural	C07090; C14279	C5H4O2	0.0567146	0.96593	1.51041	0.729871	-0.102862	0.697253	-0.284563	0.0560674	-0.494332	0.000803165	-0.311934	0.00163726	0.102748	0.716659	-
16	96.0092	46034.8	0.429068	Maleimide	C07272	C4H3NO2	0.135088	0.562296	-0.0331407	0.953259	-0.171166	0.416492	-0.0485103	0.557168	-0.112551	0.677824	0.105162	0.42888	0.0429181	0.999213	-
17	97.0655	741286	0.329687	Cyclohexanone; (E)-2-Hexenal; 3-Hexenal	C00414; C08497; C16310	C6H10O	0.0399529	0.987896	-0.0454894	0.84775	0.214315	0.309695	0.0260059	0.894789	-0.110665	0.600474	0.09809	0.401327	-0.0143835	0.999213	-
18	98.0248	8283.78	0.520965	Succinimide; Hymexazol	C07273; C11103	C4H5NO2	0.167705	0.830403	-0.0301864	0.92943	0.167899	0.251389	0.512768	0.000146335	-0.0801855	0.740385	0.0352403	0.830585	0.0653325	0.999213	-
19	100.041	2562.27	0.37963	1-Aminocyclopropane-1-carboxylate; Homoserine lactone; Diacetylmonoxime; L-...	C01234; C02926; C07509; C08267; C11106; C17234; C19456; C19777	C4H7NO2	0.0557416	0.784037	0.107409	0.193404	0.0659981	0.69846	-0.0767379	0.171315	0.0210667	0.913518	0.0917385	0.418661	0.0506447	0.999213	-
20	101.06	39761.3	-0.25299	Pentanoate; 3-Methylbutanoic acid; 2-Methylbutyrate	C00803; C08262; C18319	C5H10O2	0.111209	0.775311	-0.0449499	0.612058	-0.0343098	0.835008	-0.114705	0.118726	-0.0802866	0.747723	0.125819	0.357845	0.0847688	0.999213	-
21	101.072	362302	0.454756	N-Nitrosodiethylamine	C14422	C4H10N2O	-0.0455077	0.987896	0.08331	0.66934	-1.53568	0.000934094	-0.309979	0.0124382	-0.193294	0.245161	0.0775471	0.584796	-0.0700795	0.999213	-
22	102.056	1.44073e+06	-0.391418	4-Aminobutanoate; N,N-Dimethylglycine; (R)-3-Amino-2-methylpropanoate; D-2-...	C00334; C01026; C01205; C02261; C02356; C02721; C03284; C03665; C05145; C11109; C11735; C19514	C4H9NO2	0.0212028	0.987896	0.0694306	0.789758	0.0273342	0.964336	-0.130065	0.365428	0.131622	0.237896	0.0958534	0.164349	0.0464851	0.999213	-
23	103.004	89874.2	-0.38522	Hydroxypyruvate; Malonate; 2-Hydroxy-3-oxopropanoate	C00168; C00383; C01146	C3H4O4	0.332145	0.34541	0.0107419	0.967455	-0.0602724	0.739267	0.326354	0.0290874	0.0200799	0.935441	0.261192	0.0151967	0.334876	0.070165	-
24	103.04	22004.2	0.284176	4-Hydroxybutanoic acid; (R)-3-Hydroxybutanoate; 3-Hydroxy-2-methylpropanoat...	C00989; C01089; C01188; C01991; C03197; C05984; C06001; C14601	C4H8O3	0.0461091	0.987896	0.373401	0.00215983	0.0300363	0.951998	0.405292	0.0235246	0.202484	0.247825	0.65267	0.00143856	0.288275	0.183481	-
25	104.035	4482.55	0.244334	L-Serine; Serine; D-Serine	C00065; C00716; C00740	C3H7NO3	-0.00111213	0.994449	0.0641983	0.753422	0.0139492	0.989798	-0.332736	0.0269019	-0.264505	0.0506813	-1.06441	4.4408e-05	0.00845667	0.999213	-
26	105.019	910.496	0.18935	D-Glycerate	C00258	C3H6O4	-0.568029	0.0203441	0.0449649	0.849269	-0.0204699	0.97548	0.138118	0.260533	0.516568	0.0083863	0.29765	0.0627746	0.0999184	0.981279	-
27	107.05	12497.5	0.468441	Benzyl alcohol; Anisole; 3-Cresol; 4-Cresol; o-Cresol; Aromatic primary alc...	C00556; C01403; C01467; C01468; C01542; C03485	C7H8O	-0.0135324	0.987896	0.123813	0.244545	0.0514439	0.817383	0.0929185	0.226085	0.619195	0.00366207	0.000909128	0.998425	-0.0205605	0.999213	-
28	108.046	65125.1	0.475781	2-Aminophenol; 4-Hydroxyaniline; Hydroxylaminobenzene; m-Aminophenol	C01987; C02372; C02720; C05058	C6H7NO	0.215397	0.392344	0.0257098	0.884208	-0.144456	0.0811724	-0.219547	0.00457715	-0.0642431	0.833322	0.104582	0.616805	0.104312	0.999213	-
29	109.03	45537.3	0.149514	Catechol; Hydroquinone; Resorcinol; Benzenediol; 5-Methyl-2-furaldehyde; Ca...	C00090; C00530; C01751; C01785; C11115; C15571	C6H6O2	0.657885	0.00115313	0.0427381	0.817588	-0.0226142	0.92123	0.0297971	0.507054	0.610883	0.00972943	0.207403	0.184107	0.190539	0.716659	-
30	109.041	8353.59	0.456161	N-Acetylimidazole; Imidazole-4-acetaldehyde	C02560; C05130	C5H6N2O	0.160649	0.454642	0.0298372	0.931014	-0.0174913	0.973073	-0.0198539	0.861932	0.0106772	0.962075	0.136416	0.344551	-0.0382158	0.999213	-
31	110.025	6548.81	0.495838	2,5-Dihydroxypyridine; 3,4-Dihydroxypyridine; 2,6-Dihydroxypyridine; 3-Hydr...	C01059; C02932; C03056; C03927; C05942	C5H5NO2	0.156818	0.354071	-0.900674	0.000722169	-0.571744	0.000786913	-0.0641514	0.285946	-0.19143	0.310872	-0.0385841	0.815915	0.0212214	0.999213	-
32	110.036	8078.17	0.217193	Cytosine	C00380	C4H5N3O	0.094387	0.751845	0.144285	0.314058	-0.0913621	0.486898	0.202777	0.0275313	0.0875817	0.846918	0.068466	0.678588	-0.000868209	0.999213	-
33	111.009	3253.57	0.596951	2-Furoate	C01546	C5H4O3	0.181646	0.448063	0.161541	0.0192395	0.0709062	0.214293	-2.12149	7.18738e-07	-1.55418	0.00146551	-1.8806	3.98271e-05	0.675832	0.00807004	x
34	111.02	228199	0.559725	Uracil; Maleic hydrazide	C00106; C18474	C4H4N2O2	0.132446	0.736214	0.31791	0.00175988	0.279548	0.0882737	-0.278257	0.0058575	-0.566718	0.0446339	-0.46525	0.00288112	0.0930117	0.999213	x
35	112.04	13465.2	0.55607	1-Pyrroline-2-carboxylate; (S)-1-Pyrroline-5-carboxylate; delta-1-Pyrroline...	C03564; C03912; C04322; C07275	C5H7NO2	0.105569	0.868943	-0.0843462	0.412186	-0.00162653	0.995251	-0.117366	0.130954	0.00166173	0.991303	0.104102	0.459009	0.00555471	0.999213	-
36	112.051	465.99	-0.134254	Creatinine; 3-(N-Nitrosomethylamino)propionitrile	C00791; C19280	C4H7N3O	0.158491	0.721535	0.0201773	0.909668	0.183055	0.220422	-0.175508	0.245375	0.0260937	0.939694	-0.0428157	0.90737	0.000738014	0.999213	-
37	113.024	20237.9	0.414958	2-Hydroxy-2,4-pentadienoate; cis-Acetylacrylate	C00596; C07091	C5H6O3	-0.0111712	0.991193	-0.0826659	0.37499	-0.332131	0.00709811	-1.39177	2.8829e-06	-2.1637	0.000599931	-2.12086	3.06498e-05	0.0167132	0.999213	-
38	113.036	7978.21	0.591247	5,6-Dihydrouracil; 3-Cyano-L-alanine; N-Methylhydantoin; 2,5-Dioxopiperazin...	C00429; C02512; C02565; C02777; C08311	C4H6N2O2	0.0572599	0.987896	0.0598449	0.676012	-0.13578	0.29283	-0.196632	0.0791369	-0.207551	0.297416	0.111392	0.352102	-0.0307334	0.999213	x
39	113.072	31101	0.525489	N-Nitrosopiperidine; L-Prolinamide	C19284; C19781	C5H10N2O	0.138805	0.833234	0.0624906	0.782345	-0.268644	0.0530497	-0.0623276	0.577868	-0.235448	0.303031	0.0558029	0.873578	0.0894531	0.999213	-
40	114.02	3220.29	-0.416585	Maleamate	C01596	C4H5NO3	-0.00389059	0.994449	0.10767	0.613223	0.0260898	0.968173	0.0569741	0.692525	0.145248	0.148989	0.0983869	0.240129	-0.155836	0.884963	-
41	114.056	29139.3	0.85909	L-Proline; D-Proline; Proline; 3-Acetamidopropanal	C00148; C00763; C16435; C18170	C5H9NO2	0.0179012	0.987896	0.0666224	0.30153	0.0590487	0.0575428	-0.0906786	0.0021001	-0.063269	0.84978	0.0434369	0.770621	-0.018045	0.999213	-
42	115.004	712630	-0.39317	Fumarate; Maleic acid; Formylpyruvate	C00122; C01384; C02150	C4H4O4	-0.149454	0.230117	-1.09022	0.00413927	0.0249898	0.970958	-1.16552	0.000718343	0.117751	0.331928	-0.03166	0.736119	-0.297958	0.416331	x
43	115.041	3.04263e+06	0.446887	3-Methyl-2-oxobutanoic acid; 3-Oxopentanoic acid; 5-Oxopentanoate; 2-Oxopen...	C00141; C02233; C03273; C06255	C5H8O3	0.0116636	0.994449	0.147004	0.260067	-0.12289	0.63153	-0.173982	0.214098	0.0114871	0.962535	-0.0129248	0.942053	0.059213	0.999213	-
44	115.076	646347	0.328446	Hexanoic acid; 4-Hydroxyhexan-3-one; trans-1,2-Cyclohexanediol; Isoamyl for...	C01585; C02948; C03739; C12293; C12304; C12313	C6H12O2	0.306421	0.239321	0.0395303	0.913511	-0.0643908	0.899491	-0.33901	0.0936807	0.090717	0.686038	0.102013	0.521819	0.152926	0.999213	-
45	115.088	175299	0.629991	5-Aminopentanamide	C00990	C5H12N2O	0.0192185	0.987896	0.0853261	0.712455	-1.02885	0.00417849	-0.120213	0.267887	-0.0146968	0.957817	0.0595902	0.573566	-0.0932332	0.999213	-
46	116.035	63712.6	0.397145	L-Aspartate 4-semialdehyde; 2-Amino-3-oxobutanoate; L-2-Amino-3-oxobutanoic...	C00441; C03214; C03508; C20250	C4H7NO3	0.0175122	0.987896	0.0216569	0.875278	0.963534	0.0112559	1.75572	0.000413604	0.163684	0.345901	0.23146	0.0390222	0.0718376	0.999213	-
47	116.072	13219.6	0.872881	L-Valine; 5-Aminopentanoate; Betaine; D-Norvaline; L-Norvaline; 2-Amino-2-m...	C00183; C00431; C00719; C01799; C01826; C03571; C06417; C07457; C15987; C16436	C5H11NO2	0.0398399	0.987896	0.0470352	0.454493	0.0774457	0.148347	-0.177079	0.00896654	-0.0197388	0.950473	0.153701	0.233286	-0.0197335	0.999213	-
48	117.019	8498.55	0.353934	Succinate; Methylmalonate; Methyl oxalate	C00042; C02170; C10900	C4H6O4	-0.702455	0.0295075	0.0901269	0.613223	-0.0377575	0.94594	0.437738	0.00536059	1.08004	0.0127049	2.60546	0.00013022	-0.488123	0.304304	-
49	117.034	5604.51	-0.104709	Benzofuran	C14512	C8H6O	-0.107419	0.904672	0.202881	0.14741	0.694205	0.0498583	2.413	0.000376154	1.61855	0.000719192	1.83697	3.50081e-06	-0.113104	0.893369	-
50	117.056	12769.1	0.471914	5-Hydroxypentanoate; 3-Hydroxyisovalerate	C02804; C20827	C5H10O3	0.127515	0.892623	0.063742	0.711429	0.387029	0.17147	0.178519	0.122819	5.15179	0.000619039	3.50516	1.3557e-05	0.161616	0.999213	-
51	118.051	3078.24	0.232216	L-Threonine; L-Homoserine; D-Threonine; 2-Methylserine; 4-Amino-3-hydroxybu...	C00188; C00263; C00820; C02115; C03678; C05519; C11108; C12317	C4H9NO3	-0.0188874	0.987896	0.0438379	0.817588	0.0750823	0.89585	-0.286336	0.0285933	-0.107963	0.549453	-0.0501428	0.584796	-0.0283996	0.999213	-
52	118.981	11329.1	0.302406	Mercaptopyruvate	C00957	C3H4O3S	0.0562988	0.987896	-0.1987	0.189109	0.0845435	0.629265	-0.721596	0.00276937	-2.25089	0.000751768	-2.60355	5.88352e-05	-0.0325816	0.999213	-
53	119.017	168609	0.433596	3-(Methylthio)propionic acid	C08276	C4H8O2S	0.106239	0.787754	0.0491561	0.817588	0.0965147	0.680165	-0.00654027	0.940092	-0.162525	0.229974	-0.0390369	0.845721	-0.0266712	0.999213	-
54	119.035	9285.5	0.151534	D-Erythrose; D-Erythrulose; L-Erythrulose; D-Threose	C01796; C02022; C02045; C06463	C4H8O4	0.0302214	0.987896	0.0752842	0.72291	-0.0643109	0.899491	-0.296881	0.0314514	-1.07087	0.000751768	-1.08428	9.76767e-05	0.0621884	0.999213	-
55	119.05	4544.94	0.486328	Phenylacetaldehyde; Styrene oxide; 4-Hydroxystyrene; p-Tolualdehyde; Acetop...	C00601; C02083; C05627; C06758; C07113; C07209; C07214; C20782	C8H8O	0.099693	0.904672	0.191261	0.133434	0.785012	0.015043	2.44518	0.000311613	0.887193	0.000619039	1.05544	3.03577e-06	-0.00184185	0.999213	-
56	120.066	5666.71	-0.667011	Tromethamine	C07182	C4H11NO3	-0.197582	0.508807	1.52547	0.751449	0.845544	0.415468	-0.706506	0.548868	0.0754948	0.836679	-0.070453	0.816765	0.0129071	0.999213	-
57	120.996	10774	0.559691	3-Mercaptolactate; 1,3-Propane sultone	C05823; C19296	C3H6O3S	-0.0175374	0.994449	-0.0355139	0.849905	-0.240858	0.188114	-1.22946	0.00130504	-1.44053	0.00157667	-1.3279	3.76641e-05	0.0248431	0.999213	-
58	121.03	7003.25	0.500004	Benzoate; Aromatic acid; 4-Hydroxybenzaldehyde; 3-Hydroxybenzaldehyde; Sali...	C00180; C00539; C00633; C03067; C06202; C15474	C7H6O2	-0.235621	0.142507	-0.0189687	0.909668	0.00293258	0.990066	0.0437755	0.335951	0.0845057	0.632729	0.033119	0.695961	0.0653735	0.999213	-
59	121.04	889768	0.244399	Nicotinamide; Picolinamide; Isonicotineamide	C00153; C01950; C02421	C6H6N2O	0.0403957	0.987896	-0.0660782	0.612058	-0.206977	0.0765395	-0.0199188	0.69781	-0.0954339	0.747723	-0.00227563	0.997021	0.0311967	0.999213	-
60	122.025	1.45116e+06	0.441537	Nicotinate; Nitrobenzene; Isonicotinic acid; Picolinic acid	C00253; C06813; C07446; C10164	C6H5NO2	0.0938475	0.721535	0.396021	0.00459899	0.423833	0.0162492	-0.358781	0.00292439	-0.278155	0.071622	0.131562	0.349329	-0.00383204	0.999213	-
61	122.061	1.40025e+07	0.329991	ortho-Anisidine; para-Anisidine	C19191; C19326	C7H9NO	0.141498	0.46575	-0.0071559	0.967455	0.048974	0.89585	-0.0405486	0.653949	0.0100679	0.971079	0.0325708	0.91061	0.00913203	0.999213	-
62	124.007	733571	-0.522412	Taurine	C00245	C2H7NO3S	-0.0066928	0.994449	0.0102865	0.946952	0.0464578	0.325026	-0.0685778	0.178163	-0.0712773	0.86222	0.127123	0.17504	-0.0331261	0.999213	-
63	124.04	765837	0.445207	N-Ethylmaleimide; N-Furfurylformamide; 3-Hydroxyaminophenol; Aminohydroquin...	C02441; C02854; C14602; C14604; C16671; C18351	C6H7NO2	0.0190152	0.987896	-0.0189525	0.927958	-0.0471122	0.844062	-0.0450677	0.625607	-0.13351	0.458348	-0.0171507	0.947361	-0.0331646	0.999213	-
64	124.051	282681	0.467004	5-Methylcytosine	C02376	C5H7N3O	0.0269996	0.987896	0.0238295	0.909668	0.0169819	0.973073	0.0665407	0.629897	-0.0425969	0.864189	0.0295407	0.799838	0.0238765	0.999213	-
65	125.024	131788	0.472054	1,2,3-Trihydroxybenzene; Phloroglucinol; Triacetate lactone; Benzene-1,2,4-...	C01108; C02183; C02752; C02814; C11101; C11918; C20718	C6H6O3	0.162799	0.46575	0.00677204	0.969443	-0.0740688	0.659884	-0.34216	0.00123031	-0.570598	0.00741548	-0.489656	0.00832401	-0.0902522	0.999213	-
66	125.035	207886	0.427798	Thymine; Imidazole-4-acetate	C00178; C02835	C5H6N2O2	0.168612	0.721535	0.0809545	0.612058	0.296572	0.00347923	0.0259718	0.441177	0.127964	0.721218	0.16775	0.208328	0.012825	0.999213	-
67	126.02	48196.1	0.233309	2,3,6-Trihydroxypyridine; 5-Hydroxypyrrole-2-carboxylate	C03458; C19721	C5H5NO3	0.353203	0.0951243	0.0791679	0.613223	-0.057932	0.89585	0.265368	0.0188765	-0.078136	0.703451	0.0462456	0.737599	0.204285	0.270345	-
68	126.056	90734.4	0.553851	(S)-2,3,4,5-Tetrahydropyridine-2-carboxylate; delta1-Piperideine-2-carboxyl...	C00450; C04092; C08268; C08292; C10149; C13694	C6H9NO2	0.0965673	0.848664	-0.000904408	0.997911	-0.106071	0.23347	-0.117258	0.139163	-0.171155	0.405264	-0.0125881	0.966166	-0.00559144	0.999213	-
69	127.04	36773.3	0.139848	Dihydro-4,4-dimethyl-2,3-furandione; Dihydrophloroglucinol; (4E)-2-Oxohexen...	C01125; C06719; C06761; C11354; C20240; C20443; C20717	C6H8O3	0.368086	0.0326089	0.178471	0.240426	-0.00245858	0.995251	-0.0480274	0.230756	0.0955007	0.696903	0.257913	0.188732	-0.00794105	0.999213	-
70	127.051	11796	0.559855	5,6-Dihydrothymine; gamma-Amino-gamma-cyanobutanoate; alpha-Amino-gamma-cya...	C00906; C05715; C05717	C5H8N2O2	0.147934	0.904672	-0.0171687	0.910865	-0.169928	0.0789741	-0.0614406	0.284917	-0.0140805	0.980365	0.00940738	0.970697	-0.00660003	0.999213	-
71	127.088	8606.28	0.60292	L-Lysine 1,6-lactam; D-2-Aminohexano-6-lactam; (S)-Piperidine-2-carboxamide	C02837; C05328; C19809	C6H12N2O	0.0714321	0.987896	0.0370819	0.836767	-0.714722	0.00520011	-0.0850979	0.480917	-0.223511	0.319531	0.0603627	0.684196	-0.0572959	0.999213	-
72	128.035	6734.03	0.112859	4-Oxoproline; Pidolic acid; 5-Oxo-D-proline; L-1-Pyrroline-3-hydroxy-5-carb...	C01877; C01879; C02237; C04281; C04282	C5H7NO3	-0.0564347	0.827196	0.0813956	0.710194	-0.0704466	0.89585	-0.127112	0.315169	-0.0382703	0.858699	-0.0602456	0.343835	-0.0338125	0.999213	-
73	129.019	7246.8	-0.0493902	2,5-Dioxopentanoate; Itaconate; Mesaconate; Acetylpyruvate; (E)-Glutaconate...	C00433; C00490; C01732; C02132; C02214; C02226; C02800	C5H6O4	0.107211	0.546239	-0.308023	0.155666	-0.0227621	0.969978	0.0426646	0.698819	-0.00926839	0.952792	-0.204589	0.0168973	0.103533	0.884963	-
74	129.055	6284	0.248473	4-Methyl-2-oxopentanoate; (S)-3-Methyl-2-oxopentanoic acid; 2-Oxohexanoic a...	C00233; C00671; C00902; C01012; C02122; C02129; C03241; C03465; C03467; C03500; C06008; C06102; C12314; C14530	C6H10O3	0.19475	0.384803	0.126713	0.632261	-0.544458	0.0157893	-0.540348	0.0151113	0.0270123	0.886483	-0.0486516	0.604773	0.308446	0.0772464	-
75	129.092	6567.5	0.380436	Ethyl isovalerate; Isoamyl acetate; Heptanoic acid	C12290; C12296; C17714	C7H14O2	0.267524	0.0191348	-0.05356	0.836781	-0.27587	0.358316	-0.436008	0.0352731	-0.0560818	0.86802	0.294877	0.108297	0.184013	0.981279	-
76	129.103	8114.02	-0.010204	N-Acetylputrescine; N-Nitrosodi-n-propylamine	C02714; C19279	C6H14N2O	-0.00783764	0.994449	0.119373	0.569218	-1.18694	0.000845356	-0.339298	0.0373854	-0.669877	0.0011419	-1.08544	3.50081e-06	-0.0149841	0.999213	-
77	130.015	17852.3	0.540867	2-Oxosuccinamate; Iminoaspartate; Calcium L-aspartate	C02362; C05840; C13058	C4H5NO4; C4H5NO4.	0.0286644	0.987896	-0.0537652	0.613223	0.132588	0.582608	-0.292054	0.0277417	0.093733	0.688641	0.140048	0.169627	0.0443196	0.999213	-
78	130.051	691926	0.552924	5-Aminolevulinate; cis-4-Hydroxy-L-proline; N-Acetyl-beta-alanine; 5-Amino-...	C00430; C01015; C01073; C01110; C01157; C01165; C03341; C03440; C03651; C03741; C05147; C19706	C5H9NO3	0.0628138	0.947611	0.13612	0.168988	-0.0349449	0.899491	-0.0129992	0.853539	0.119911	0.632729	0.126787	0.279614	0.0375973	0.999213	-
79	130.087	8912.98	0.832155	L-Leucine; L-Isoleucine; D-Leucine; L-Norleucine; 6-Aminohexanoate; (3R)-be...	C00123; C00407; C01570; C01933; C02378; C02486; C06418; C08263; C16434; C16439; C16647	C6H13NO2	0.023694	0.987896	0.0446472	0.447209	0.00299706	0.990066	-0.21242	0.0114981	-0.0406719	0.86802	0.107513	0.349343	-0.0275845	0.999213	-
80	131.036	57102.8	0.336197	Glutarate; 2-Acetolactate; Deoxyribonolactone; 4-Hydroxy-2-oxopentanoate; 2...	C00489; C00900; C02674; C03589; C04106; C04181; C06010; C11838	C5H8O4	0.0638535	0.570107	0.0400134	0.849905	-0.0899793	0.797858	-0.222573	0.0325445	-0.456792	0.0103001	-0.4228	0.00113161	0.0437808	0.999213	-
81	131.046	8863.25	0.174435	L-Asparagine; N-Carbamoylsarcosine; D-Asparagine; Glycylglycine; 3-Ureidopr...	C00152; C01043; C01905; C02037; C02642; C16438; C19258; C19301	C4H8N2O3	0.0277503	0.987896	0.075884	0.733814	-0.142941	0.697227	-0.137513	0.243122	0.12476	0.363867	0.635635	9.97573e-06	0.0218827	0.999213	x
82	131.071	10448.7	0.143516	D-2-Hydroxyisocaproate; Ethyl (R)-3-hydroxybutanoate; 6-Hydroxyhexanoic aci...	C03264; C03499; C06103; C07834	C6H12O3	0.0354973	0.94183	0.0427808	0.698025	1.85024	0.00709811	2.37645	0.000605111	2.29436	0.000862564	2.62008	5.83946e-06	0.0372688	0.999213	-
83	131.083	17912.5	0.44671	L-Ornithine; D-Ornithine; Ornithine; (2R,4S)-2,4-Diaminopentanoate; D-Ornit...	C00077; C00515; C01602; C03943; C11320	C5H12N2O2; C5H12N2O2.	0.0469497	0.904672	0.035307	0.487826	-0.0496081	0.232975	-0.0228258	0.576676	-0.0439295	0.704535	0.0587724	0.377387	-0.0057763	0.999213	-
84	132.03	571553	-0.452727	L-Aspartate; D-Aspartate; Aspartate; Iminodiacetate	C00049; C00402; C16433; C19911	C4H7NO4	-0.0531499	0.892623	0.0990596	0.730824	0.14028	0.81722	-0.0607874	0.653592	0.115605	0.370191	0.0636394	0.575155	-0.177516	0.999213	-
85	133.014	2.00803e+07	0.264325	(S)-Malate; (R)-Malate; Malate; 3-Dehydro-L-threonate	C00149; C00497; C00711; C03064	C4H6O5	-3.14294	0.000900299	-2.51924	0.000744346	-0.0105221	0.990066	-2.78116	0.000183815	0.192592	0.292107	-3.16548	0.000214456	-2.83187	0.00892971	x
86	133.034	883187	-0.455184	S,S-Dimethyl-beta-propiothetin	C04022	C5H10O2S	-0.0593659	0.87265	0.0203251	0.952	0.140995	0.797858	-0.0821771	0.537751	0.118973	0.355932	0.0768106	0.471035	-0.198214	0.954337	-
87	133.051	1.49414e+06	0.174182	Deoxyribose; 2-Deoxy-L-arabinose; 2,3-Dihydroxy-3-methylbutanoate; (R)-2,3-...	C01801; C02783; C04039; C04272; C06257; C08347	C5H10O4	0.325752	0.239321	0.0705874	0.662685	-0.0683443	0.809523	-0.186322	0.0314514	0.322087	0.0492088	0.219929	0.0867435	0.0466883	0.999213	-
88	133.064	614585	0.234238	L-Canaline; N-Nitrosodiethanolamine	C08270; C19278	C4H10N2O3	0.111163	0.826697	-0.00642987	0.97434	-0.0280787	0.92123	-0.160414	0.0146586	0.0540653	0.85806	0.167208	0.385944	-0.0747331	0.999213	-
89	135.031	298579	-0.0452613	Hypoxanthine	C00262	C5H4N4O	0.166622	0.242824	0.63206	0.00163142	0.416601	0.0811724	0.656617	0.00117566	0.185493	0.269301	0.167701	0.0564809	0.280578	0.115402	-
90	135.046	498570	0.617556	Phenyl acetate; Toluate; 4-Hydroxyphenylacetaldehyde; Benzylformate; 3,4-Di...	C00548; C01454; C03765; C05613; C06224; C07085; C07086; C07189; C07211; C07215; C10700; C10761; C14087; C15583; C20645	C8H8O2	0.199726	0.149308	0.731959	0.000461754	0.719968	0.00501395	1.15594	0.0244664	0.52063	0.124581	0.356451	0.407104	0.0239497	0.999213	-
91	136.04	109037	0.446906	Anthranilate; 4-Aminobenzoate; N-Methylnicotinate; 4-Nitrotoluene; 3-Nitrot...	C00108; C00568; C01004; C14394; C19486; C19597	C7H7NO2	0.169936	0.518701	0.128844	0.217688	0.189567	0.0530497	0.318275	0.00053343	0.013877	0.94369	0.111445	0.217168	-0.00705574	0.999213	-
92	136.051	284623	-0.338801	Isoniazid	C07054	C6H7N3O	-0.0022726	0.994449	0.352277	0.00413927	0.225625	0.0165037	0.637324	0.0357207	0.157887	0.0506813	0.0859602	0.133437	-0.0521893	0.999213	-
93	136.077	109198	0.4286	Tyramine; N,N-Dimethylaniline N-oxide; Phenylethanolamine; 1-(p-Hydroxyphen...	C00483; C01183; C02735; C03473; C16570; C18396; C19216; C19376	C8H11NO	0.175014	0.533642	-0.105751	0.613223	-0.068087	0.787528	-0.155075	0.0445718	-0.0889482	0.682759	0.126168	0.566502	0.0842423	0.999213	-
94	137.061	34301	0.361329	3-Methoxybenzyl alcohol; 4-Hydroxyphenylethanol; 3-Ethylcatechol; Styrene-c...	C03352; C06044; C06728; C07084; C11480; C13638; C20694	C8H10O2	0.0277349	0.987896	-0.0571048	0.82839	0.129191	0.680907	0.0354955	0.871268	-0.127727	0.455536	0.0156629	0.909711	0.0286977	0.999213	-
95	137.071	23226.1	-0.324389	4-Hydroxymethylphenylhydrazine; 1-Methyl-1,6-dihydropyridine-2-carbaldoxime...	C03994; C11765; C19218	C7H10N2O	0.0786545	0.927816	0.0790926	0.660057	-0.0739617	0.844062	-0.032923	0.815775	-0.158026	0.469541	-0.0346415	0.853307	0.0178829	0.999213	-
96	138.023	14973.2	0.464232	3-Aminopropanesulfonate	C03349	C3H9NO3S	0.0114415	0.987896	-0.00790036	0.9722	0.075371	0.89585	0.0908766	0.509325	-0.119002	0.478047	0.0557957	0.607665	-0.0411108	0.999213	-
97	138.056	17935.4	0.443623	Gabaculine	C12110	C7H9NO2	0.121341	0.617048	0.0199605	0.892846	-0.0359199	0.846973	0.00204854	0.968463	-0.0741049	0.686038	0.0534236	0.756764	-0.0333451	0.999213	-
98	138.067	13040.1	0.479375	4-Amino-5-hydroxymethyl-2-methylpyrimidine; L-Histidinal	C01279; C01929	C6H9N3O	0.115482	0.775311	0.131344	0.583612	0.0331524	0.824205	0.0934909	0.433884	-0.0386245	0.880068	0.0745311	0.70237	-0.00523985	0.999213	-
99	139.976	10655.2	-0.127394	Carbamoyl phosphate	C00169	CH4NO5P	0.162205	0.533642	-0.0674536	0.633181	0.130811	0.148347	0.0360455	0.777717	-0.0561536	0.836679	-0.00769505	0.965496	-0.0507198	0.999213	-
100	140.071	10681.9	0.435656	Ethosuximide; Hypoglycin; Arecaidine; Guvacoline	C07505; C08287; C10128; C16821	C7H11NO2	0.0499359	0.987896	0.0767464	0.480938	-0.147338	0.278505	-0.149447	0.064509	-0.0949815	0.699197	0.0436387	0.747104	0.0759676	0.947263	-
101	141.02	13504.9	0.485335	2-Hydroxymuconate semialdehyde; cis,cis-Muconate; 2-Oxo-2,3-dihydrofuran-5-...	C00682; C02480; C03586; C03647; C03743; C04105; C06603; C14516; C14610; C20448	C6H6O4	0.0251765	0.987896	-0.0687063	0.804076	0.0933343	0.820951	0.0846991	0.601918	-0.11386	0.572026	0.0251358	0.870105	-0.0455087	0.999213	-
102	141.067	10504.8	0.5215	Ectoine	C06231	C6H10N2O2	0.0378206	0.987896	0.0517923	0.730859	-0.111512	0.579621	-0.681763	0.00276273	-0.596865	0.00523353	-0.397984	0.00384805	-0.046578	0.999213	-
103	142.051	10611.9	0.573035	2-Hydroxymethylclavam	C17357	C6H9NO3	0.126385	0.721535	0.0648041	0.503695	-0.0601398	0.661905	-0.0581961	0.423064	-0.053821	0.864293	0.131118	0.484933	-0.0137853	0.999213	-
104	142.088	10281.4	0.43032	(E)-4-(Trimethylammonio)but-2-enoate; Stachydrine	C04114; C10172	C7H13NO2	0.153566	0.705239	0.102625	0.657252	-0.551436	0.00770602	-0.556642	0.00100554	-0.0509319	0.792242	-0.0990256	0.742084	0.0751723	0.999213	-
105	143.035	9844.83	0.465248	2,3-Dimethylmaleate; Triacetate; Methylitaconate; 2-Methyleneglutarate; 2-H...	C00922; C01757; C02295; C02930; C19821; C19822; C19826	C6H8O4	0.0320809	0.987896	-0.0512739	0.525398	-0.263341	0.00408672	-1.00966	7.18738e-07	-1.32795	0.000599931	-1.2236	9.76767e-05	0.00773586	0.999213	-
106	143.046	9636.36	0.457091	N-Nitrosoproline	C19485	C5H8N2O3	0.0572107	0.892623	0.0242125	0.909668	-0.2343	0.0386093	-0.145089	0.0225755	-0.574165	0.0446339	-0.23071	0.0147789	0.0891777	0.974282	-
107	143.108	9263.78	0.27103	Octanoic acid; Valproic acid	C06423; C07185	C8H16O2	0.185265	0.230117	0.00914635	0.969443	-0.218369	0.3318	-0.322062	0.0565488	-0.0382077	0.875233	0.185634	0.207193	0.0603517	0.999213	-
108	144.03	9074.35	0.269502	2-Oxoglutaramate; 4-Oxoglutaramate	C00940; C05572	C5H7NO4	1.33522	0.000639953	0.0222732	0.88458	-0.093086	0.721419	0.0154787	0.892605	0.0994286	0.59075	0.134662	0.308511	0.149928	0.803422	-
109	144.045	9272.48	0.520524	3-Methyleneoxindole; Isocarbostyril; Quinolin-2-ol; 4-Hydroxyquinoline; 2(1...	C02796; C06324; C06338; C06343; C06415; C08493; C19434	C9H7NO	0.140396	0.617048	0.0358791	0.814737	-0.014194	0.899491	0.0361883	0.232623	-0.0615286	0.846918	0.0373645	0.742084	0.0048462	0.999213	-
110	144.066	8989.94	0.473659	4-Acetamidobutanoate; 6-Amino-2-oxohexanoate; (S)-5-Amino-3-oxohexanoic aci...	C02946; C03239; C03656; C04076; C05825	C6H11NO3	0.0335019	0.987896	0.0485075	0.677086	-0.119348	0.458517	-0.174034	0.0333625	0.596034	0.00972943	-0.035415	0.816765	-0.0270881	0.999213	-
111	144.078	8959.17	0.613636	4-Guanidinobutanoate	C01035	C5H11N3O2	0.025328	0.987896	0.0245686	0.875278	-0.223476	0.188426	-0.178637	0.0183789	0.315229	0.0558788	0.0948647	0.592522	-0.0109282	0.999213	-
112	145.014	8616.09	0.315964	2-Oxoglutarate; Oxaloacetate 4-methyl ester; 5-Hydroxy-2,4-dioxopentanoate;...	C00026; C03716; C05406; C06030; C06316	C5H6O5	0.278304	0.26639	0.104717	0.602101	-0.183548	0.3528	-0.165453	0.0647009	0.559556	0.0513371	0.723507	0.000165966	-0.139404	0.762672	-
113	145.041	160649	0.552122	1(2H)-Phthalazinone	C14473	C8H6N2O	0.0890939	0.833862	0.0141705	0.927958	-0.632387	0.000845356	-0.207084	0.0138879	-0.116186	0.613807	0.0133508	0.962744	-0.0661868	0.999213	-
114	145.051	1.05446e+06	0.53418	2-Aceto-2-hydroxybutanoate; Mevaldate; 2-Dehydropantoate; (R)-4-Dehydropant...	C00659; C00772; C00966; C01053; C04237; C06006; C06104; C06762; C13811; C14463; C16272	C6H10O4; C6H10O4.	0.0276827	0.987896	-0.00755887	0.965418	-1.20925	0.00183986	-0.299085	0.0091608	-0.0471091	0.858741	0.0759348	0.352102	0.0704356	0.999213	-
115	145.062	14953.2	0.575852	L-Glutamine; Glutamine; D-Glutamine; 3-Ureidoisobutyrate; Isoglutamine	C00064; C00303; C00819; C05100; C16673	C5H10N2O3	0.0547102	0.987896	-0.0178775	0.953259	-2.6399	0.00160352	-0.457381	0.0146655	-0.0566006	0.833322	0.0648108	0.389231	-0.0116205	0.999213	-
116	145.098	3702.33	0.803425	L-Lysine; D-Lysine; (3S)-3,6-Diaminohexanoate; (3S,5S)-3,5-Diaminohexanoate...	C00047; C00739; C01142; C01186; C05161; C16440; C20277	C6H14N2O2	0.007895	0.994449	0.0314914	0.502151	0.0382117	0.638853	-0.254481	0.0178041	-0.199211	0.171564	-0.0455763	0.731505	-0.0196632	0.999213	-
117	146.026	14124.7	-0.171162	Indole-5,6-quinone; Isatin	C05579; C11129	C8H5NO2	0.0129142	0.987896	0.0209983	0.814737	0.0966332	0.00501395	0.0523061	0.284435	0.000342223	0.996573	0.0163866	0.816765	-0.0307846	0.999213	-
118	146.046	5194.12	-0.401686	L-Glutamate; D-Glutamate; Glutamate; O-Acetyl-L-serine; L-threo-3-Methylasp...	C00025; C00217; C00302; C00979; C03618; C03790; C05574; C05938; C05941; C12269	C5H9NO4	-0.00554674	0.994449	0.082497	0.737773	0.113061	0.844062	0.0574874	0.669675	0.0903302	0.524672	0.0770073	0.459009	-0.00780624	0.999213	-
119	147.03	30116.5	0.306209	D-Arabinono-1,4-lactone; 2-Dehydro-3-deoxy-L-arabinonate; Citramalate; (R)-...	C00652; C00684; C00815; C01087; C01114; C02266; C02612; C02614; C02630; C02753; C02994; C03196; C03826; C05405; C06029; C06031; C06032	C5H8O5	-0.161231	0.155772	0.482244	0.00212106	0.0137664	0.982836	0.702121	0.00147894	0.0971291	0.504339	0.0430071	0.517413	0.0911641	0.937018	-
120	147.066	150059	-0.102935	(R)-Mevalonate; (R)-Pantoate; (S)-Mevalonate; 3,6-Dideoxy-L-galactose; 2,3-...	C00418; C00522; C02104; C03348; C04104; C06007; C06471	C6H12O4	-0.00977269	0.994449	0.0940733	0.583612	-0.0723536	0.81615	-0.0946885	0.191921	0.0850975	0.653156	0.0249421	0.797979	-0.0444165	0.999213	-
121	148.044	256053	0.697936	L-Methionine; D-Methionine; Methionine; Penicillamine	C00073; C00855; C01733; C07418	C5H11NO2S	0.0199302	0.987896	0.0269052	0.802552	-0.0448728	0.841685	-0.299901	0.00941113	-0.0466814	0.864189	0.0101595	0.944449	-0.0274333	0.999213	-
122	148.061	9.00396e+06	0.421767	N,N-Dihydroxy-L-valine	C20314	C5H11NO4	0.0454109	0.987896	0.477566	0.000687208	0.199543	0.0711512	-0.0801244	0.121206	0.0630077	0.813332	0.0900526	0.491808	0.101069	0.999213	-
123	148.991	541964	0.370897	Thiodiacetic acid	C14872	C4H6O4S	-0.0317139	0.987896	0.0391865	0.817588	0.0880494	0.782489	0.323811	0.00942101	-2.43489	0.000599931	-1.08983	0.00211071	-0.0224125	0.999213	-
124	149.046	375168	0.49196	D-Ribose; D-Xylose; D-Arabinose; L-Arabinose; D-Ribulose; D-Xylulose; L-Xyl...	C00121; C00181; C00216; C00259; C00309; C00310; C00312; C00476; C00508; C01394; C01488; C01508; C01510; C02096; C02204; C02205; C02479; C02604; C05052; C06115; C08346; C08353; C08354; C11476; C16639; C20569	C5H10O5	-0.00691435	0.994449	0.0893398	0.678825	-0.0526687	0.933007	-0.184297	0.15506	-0.145593	0.381914	-0.0511454	0.669595	-0.0142296	0.999213	-
125	149.06	114587	0.341874	Tolylacetate; 4-Coumaryl alcohol; Phenylpropanoate; p-Hydroxypropiophenone;...	C01963; C02646; C05629; C13342; C15513; C16706; C17883; C19291; C20697	C9H10O2	0.134615	0.688575	-0.0163477	0.927617	-0.0589324	0.72641	-0.0953522	0.21521	-0.090852	0.568502	0.0110929	0.940261	-0.0182466	0.999213	-
126	149.072	51213.7	0.215794	N-Methylanthranilamide; N,N-Dimethyl-4-nitrosoaniline	C17512; C19680	C8H10N2O	0.112444	0.46575	0.0624471	0.814737	-0.0831175	0.707943	-0.0554598	0.514138	-0.0210344	0.951994	0.0472928	0.823108	0.0688566	0.999213	-
127	150.042	77736	0.552641	Guanine	C00242	C5H5N5O	-0.00582103	0.994449	1.34466	0.000387111	0.861577	0.00648271	1.1181	1.52298e-05	-0.0357984	0.886483	0.00972062	0.956176	-0.0495657	0.999213	-
128	150.055	42382.2	0.522939	N-(Acetyloxy)benzenamine; N-Methylanthranilate; N-Methyl-4-aminobenzoate; (...	C02709; C03005; C03522; C04350; C04353; C06804; C07301; C16571; C17755; C17756; C18623; C20634	C8H9NO2	0.103285	0.607269	0.347691	0.00533808	0.182406	0.0997123	0.295496	0.0063355	0.00921604	0.956863	0.0863601	0.553026	0.127795	0.839692	-
129	150.067	17366.7	0.0922834	Phenicarbazide	C19498	C7H9N3O	0.117256	0.69264	0.229164	0.183013	-0.000872752	0.996123	0.103908	0.0663845	-0.0174272	0.957817	0.00802608	0.981929	-0.0779716	0.999213	-
130	151.026	5228.25	0.260437	Xanthine; Alloxanthine	C00385; C07599	C5H4N4O2	-0.39702	0.448063	0.0624092	0.813571	0.0302449	0.973073	0.347611	0.0591864	0.509381	0.0100458	0.665561	0.00198462	-0.462254	0.762672	-
131	151.051	6758.63	0.531517	N1-Methyl-2-pyridone-5-carboxamide; N1-Methyl-4-pyridone-5-carboxamide; 2-A...	C05842; C05843; C16398; C18320	C7H8N2O2	0.219596	0.611987	0.10819	0.612058	-0.0464161	0.536828	0.067473	0.139713	-0.0959199	0.71044	0.0376295	0.85944	0.0204564	0.999213	-
132	151.061	9893.99	0.510555	Xylitol; Ribitol; L-Arabitol; D-Apiitol; D-Arabitol	C00379; C00474; C00532; C01569; C01904	C5H12O5	0.00584871	0.994449	0.0619482	0.671661	0.0116847	0.951998	-0.135531	0.0744006	-0.0795022	0.76654	-0.0174802	0.93252	0.0208101	0.999213	-
133	151.076	6173.26	-0.27411	3-Isopropylcatechol	C01014	C9H12O2	0.0836473	0.904672	-0.036903	0.875278	-0.0289756	0.933007	-0.0656011	0.548738	-0.0182324	0.947556	0.0827604	0.543113	0.032999	0.999213	-
134	151.088	18259.6	-0.0765589	4-(Hydroxylamino)-N,N-dimethylaniline	C19681	C8H12N2O	0.245791	0.392344	0.12211	0.703678	-0.0818754	0.840918	-0.0360112	0.753381	-0.107618	0.643781	-0.0367428	0.902001	-0.0607194	0.999213	-
135	152.034	4129.52	0.391022	3-Hydroxyanthranilate; 3-Hydroxy-2-methylpyridine-5-carboxylate; 4-Aminosal...	C00632; C01270; C02518; C06669; C07555; C11343; C12107; C12115; C16235; C19270	C7H7NO3	0.189108	0.570107	-0.345461	0.00212106	-0.259336	0.00672522	0.0681326	0.18456	0.10164	0.724108	0.25972	0.220564	0.0940478	0.999213	-
136	152.046	345760	-0.194473	1,2-Diamino-4-nitrobenzene; 1,4-Diamino-2-nitrobenzene	C19384; C19385	C6H7N3O2	0.156125	0.721535	0.036282	0.92866	-0.0956074	0.631825	0.214929	0.0317117	-0.00507711	0.987971	0.0951331	0.809598	-0.111629	0.999213	-
137	152.072	3990.18	0.37603	Dopamine; Octopamine; Vanillylamine	C03758; C04227; C16666	C8H11NO2	0.245105	0.662673	0.00414169	0.986883	0.0034058	0.990066	-0.105473	0.153668	0.02573	0.93841	0.0498726	0.88702	-0.00525455	0.999213	-
138	152.996	8260.72	0.302511	Propanoyl phosphate; Hydroxyacetone phosphate; Glycerol 1,2-cyclic phosphate	C02876; C03505; C03947	C3H7O5P	-0.0983082	0.536533	0.277653	0.296252	0.345337	0.317933	0.998175	0.000726952	0.132632	0.528451	-0.0506852	0.704732	0.0209013	0.999213	-
139	153.019	726442	0.428318	2,3-Dihydroxybenzoate; 3,4-Dihydroxybenzoate; 2,5-Dihydroxybenzoate; Patulin	C00196; C00230; C00628; C16748	C7H6O4	0.253604	0.0951243	0.0839587	0.671661	-0.0126033	0.967512	-0.231577	0.00123031	-0.380127	0.039239	-0.0257682	0.774864	0.265094	0.0508872	-
140	153.03	8579.69	0.385458	Imidazol-5-yl-pyruvate; 3-Imidazole-2-oxopropanoate; 2-Amino-4-nitrophenol;...	C03277; C03762; C19321; C19322; C19323	C6H6N2O3	0.356868	0.0528774	0.0701216	0.414168	0.0711361	0.654104	0.134229	0.0203625	-0.0625023	0.864293	0.227524	0.0349616	-0.0842545	0.999213	-
141	153.092	5580.59	0.073776	Boschnialactone	C09772	C9H14O2	0.149057	0.826697	-0.041568	0.814737	-0.0312118	0.912889	-0.0791095	0.209357	-0.198834	0.524672	-0.0579213	0.814469	-0.101528	0.999213	-
142	154.062	242069	-0.479263	L-Histidine; Histidine; 3-(Pyrazol-1-yl)-L-alanine; D-Histidine	C00135; C00768; C01162; C06419	C6H9N3O2	-0.0227163	0.987896	0.137779	0.381104	0.178189	0.54067	0.118374	0.285946	0.163084	0.0376863	0.106178	0.310778	0.04645	0.999213	-
143	154.975	578667	0.26601	2-Phosphoglycolate	C00988	C2H5O6P	-0.291507	0.34541	0.00728971	0.964299	-0.0117064	0.970958	0.139087	0.0812277	-0.0556166	0.862932	0.54977	0.00156673	-0.159449	0.999213	-
144	154.998	41971.4	0.113806	2,5-Furandicarboxylate	C20450	C6H4O5	0.392751	0.0191348	0.463682	0.657252	0.247514	0.0747758	-0.744732	0.053145	-0.0981634	0.642285	-0.347523	0.0245361	-0.140921	0.88231	-
145	155.046	7654.16	0.344663	4-Imidazolone-5-propanoate; (S)-3-(Imidazol-5-yl)lactate; Imidazole lactate...	C03680; C03817; C05568; C19481	C6H8N2O3	0.0864327	0.904672	0.178689	0.178655	-0.0208483	0.943585	0.359332	0.00872734	0.263737	0.495192	0.328558	0.366744	0.0433659	0.999213	-
146	155.108	2345.73	0.298608	Nonane-4,6-dione; Chalcogran; gamma-Nonalactone	C02445; C08471; C08501	C9H16O2	0.00636046	0.994449	-0.00807652	0.965418	-0.2139	0.149648	-0.483213	0.0022206	-0.0189644	0.948263	-0.0203602	0.916948	0.00681972	0.999213	x
147	156.029	3749.74	0.283839	2-Aminomuconate; 5-Nitro-2-furfuryl methyl ether; Clavam-2-carboxylate	C02220; C14293; C17358	C6H7NO4	0.17733	0.775311	0.0197938	0.945913	0.117653	0.427509	-0.223056	0.07778	0.455371	0.0357283	0.456661	0.00288698	-0.0443846	0.999213	-
148	156.067	34966.6	-0.169852	Paramethadione; 2-Hydroxyethylclavam; Ethadione; 3-Methylcrotonylglycine	C07411; C17361; C17724; C20828	C7H11NO3	0.0295012	0.775311	0.0786398	0.560592	-0.0649768	0.72641	-0.0751212	0.383189	0.05269	0.637038	0.136346	0.0315245	0.00483487	0.999213	-
149	156.103	278697	0.400777	Homostachydrine; Lentiginosine; Tranexamic acid	C08283; C10155; C12535	C8H15NO2	0.0664244	0.959728	0.0470817	0.836781	-0.727985	0.0264572	-0.818588	0.00224942	-0.21803	0.482979	-0.0195804	0.956176	-0.138197	0.716659	-
150	157.014	4762.53	0.36418	2-Maleylacetate; 2-Hydroxymuconate; gamma-Oxalocrotonate; 3-Hydroxy-cis,cis...	C02222; C02501; C03453; C03676; C06035	C6H6O5	0.388219	0.0326089	-0.039431	0.839779	0.0957291	0.368194	1.80252	0.000291046	0.0586198	0.716167	0.3474	0.0117574	-0.0250075	0.999213	-
151	157.062	6387.03	0.46627	4-Methylene-L-glutamine; 5-Hydroxyectoine	C01109; C16432	C6H10N2O3	0.124238	0.607269	-0.0160494	0.960101	-0.236573	0.205032	-0.111507	0.120028	0.116424	0.51266	0.0301445	0.796283	-0.0107482	0.999213	-
152	157.123	10510.6	0.394723	Nonanoic acid	C01601	C9H18O2	0.0886106	0.624394	-0.0617237	0.697991	-0.103499	0.577519	-0.0511363	0.824106	-0.286107	0.776111	0.234685	0.154944	0.134983	0.999213	-
153	157.134	3634.32	0.61909	N-Nitrosodi-n-butylamine	C19277	C8H18N2O	0.0145713	0.992308	0.0737117	0.732828	-1.43492	0.000845356	-0.199572	0.155906	-0.108896	0.504932	-0.138672	0.0979953	0.0665338	0.999213	-
154	158.046	14167.4	0.413743	4-Methylene-L-glutamate; N-Methyl-2-oxoglutaramate	C00651; C03623	C6H9NO4	0.177751	0.713925	0.0412221	0.810939	0.0845689	0.733593	-0.0159389	0.874754	0.209876	0.305195	0.139294	0.130512	0.103742	0.759535	-
155	158.082	10112.5	0.269463	5-Acetamidopentanoate; (-)-Betonicine; 3-Hydroxystachydrine; Calystegin A3	C03087; C08269; C10151; C10850	C7H13NO3	0.0485243	0.927816	0.058648	0.71702	-1.00423	0.000786913	-0.527091	0.00594254	1.20659	0.000599931	1.12211	4.1202e-05	-0.0371424	0.999213	-
156	158.093	3145.13	0.517442	delta-Guanidinovaleric acid	C13688	C6H13N3O2	0.0979316	0.927816	0.0849593	0.727228	-0.476416	0.0803771	-0.13316	0.332084	0.693384	0.00523353	0.649678	0.00450958	0.0374482	0.999213	-
157	158.985	3623.88	0.504237	6-Chlorobenzene-1,2,4-triol; 5-Chloro-1,2,4-trihydroxybenzene	C06328; C07102	C6H5ClO3	0.00343754	0.994449	0.0605027	0.733814	0.114176	0.579621	-0.0244498	0.892285	-0.153277	0.369769	-0.00602451	0.970422	-0.0818191	0.999213	-
158	159.03	11220.4	0.330779	2-Oxoadipate; 3-Oxoadipate; 3D-(3,5/4)-Trihydroxycyclohexane-1,2-dione; D-2...	C00322; C00846; C04287; C06891; C16159; C20781	C6H8O5	0.658729	0.00119312	-0.570928	0.0234689	-0.0575463	0.89585	-0.133414	0.167824	0.0289371	0.905262	-0.139536	0.203871	0.107053	0.999213	-
159	159.066	7883.41	0.529832	Pimelate; (1S,3R,4S)-3,4-Dihydroxycyclohexane-1-carboxylate; 2-Propylsuccin...	C02656; C04687; C16657	C7H12O4	0.00339065	0.994449	0.0990638	0.235709	-0.353385	0.00155604	0.193146	0.0478261	0.181318	0.299376	0.138781	0.539883	0.0804023	0.999213	-
160	159.077	3328.24	0.5713	D-Alanyl-D-alanine; N5-Methyl-L-glutamine; N(gamma)-Acetyldiaminobutyrate; ...	C00993; C03153; C06442; C10996; C19929	C6H12N2O3	0.441649	0.0326089	0.167875	0.412186	-1.4128	0.000685966	-0.0290698	0.813096	1.63716	0.000670439	2.25426	0.000160794	0.262649	0.88212	-
161	159.102	3394.92	0.15759	Ethyl (R)-3-hydroxyhexanoate; Ethyl (S)-3-hydroxyhexanoate; 4-Hydroxyvalpro...	C03864; C03865; C16649; C16650; C16651; C17527; C20793	C8H16O3	0.147699	0.778162	0.0805067	0.71702	-0.00315214	0.996123	-0.1774	0.0998156	0.0370635	0.94369	0.270048	0.161203	-0.034579	0.999213	-
162	160.025	5449.38	0.50846	N-Formyl-L-aspartate	C01044	C5H7NO5	0.139685	0.46575	0.119595	0.594893	0.136356	0.5858	-0.147667	0.131911	0.0439366	0.879145	0.303058	0.0230508	0.00560831	0.999213	-
163	160.061	21032.7	0.348768	L-2-Aminoadipate; N-Methyl-L-glutamate; O-Acetyl-L-homoserine; beta-Alanopi...	C00956; C01046; C01077; C02207; C03210; C05016; C06234; C17581; C19694	C6H11NO4	-0.118268	0.529325	0.145036	0.405037	0.328125	0.278505	-0.0141796	0.890257	-0.10486	0.608127	-0.219459	0.0404125	-0.0179265	0.999213	-
164	160.078	14185.9	0.504791	Indole-3-ethanol; Boschniakine	C00955; C09915	C10H11NO	0.208817	0.696968	0.205142	0.178655	-0.0543459	0.866069	-0.0612455	0.271233	0.313016	0.262002	0.147932	0.467123	0.0300508	0.999213	-
165	161.046	4492.43	0.372228	Lichenin; (R)-3,3-Dimethylmalate; 3-Ethylmalate; 2-Hydroxyadipate; (R)-2-Et...	C00478; C01088; C01989; C02360; C02488; C02991; C03652; C03761; C03827; C03979; C06158; C06159; C06474; C06478; C06485; C11592; C16390; C17209; C18028	C6H10O5	-0.0199166	0.987896	0.0179055	0.909668	-0.129846	0.414201	-0.401358	0.00201192	-0.400346	0.0120027	-0.462767	0.000234651	0.0259473	0.999213	x
166	161.071	49016.1	0.269639	1-Ethyl-2-benzimidazolinone	C13840	C9H10N2O	0.100257	0.705239	-0.0124096	0.919434	-0.261481	0.00628677	-0.183956	0.000588176	-0.324171	0.13045	-0.207253	0.263338	-0.0531818	0.999213	-
167	161.093	2573.99	0.485655	N6-Hydroxy-L-lysine; 2-Deoxystreptamine; L-Hydroxylysine; allo-Hydroxy-L-ly...	C01028; C02627; C16741; C16742	C6H14N2O3	0.0230059	0.994449	0.0182917	0.828735	0.0162607	0.933987	-0.307487	0.0039357	-0.165379	0.292107	0.0555016	0.751197	0.131176	0.999213	-
168	162.041	47401.7	0.378989	3-Hydroxy-L-glutamate; 4-Hydroxy-L-glutamate; L-erythro-4-Hydroxyglutamate;...	C00715; C03066; C03079; C05947	C5H9NO5; C6H5N5O	0.106604	0.354244	0.178138	0.247728	0.0398972	0.931569	-0.0491276	0.621489	-0.161138	0.51266	-0.0776529	0.534208	0.126394	0.607121	-
169	162.057	45201.6	0.43863	3-Methyldioxyindole; 4-Oxo-1-(3-pyridyl)-1-butanone	C05834; C19567	C9H9NO2	0.264671	0.0808498	0.0429607	0.71702	-0.191899	0.00497229	-0.159541	0.0615231	-0.0471962	0.84352	-0.0543941	0.816765	0.030105	0.999213	-
170	163.051	4337.8	0.494059	Ricinine	C01526	C8H8N2O2	0.045971	0.987454	0.0763024	0.677086	-0.0191924	0.817383	-0.0392459	0.420339	-0.107764	0.538988	-0.000923659	0.998425	0.103285	0.999213	-
171	163.061	2956.52	0.448169	L-Rhamnose; 2-Deoxy-D-glucose; L-Rhamnulose; 6-Deoxy-D-galactose; 6-Deoxy-L...	C00507; C00586; C00861; C01018; C01019; C01684; C01721; C02095; C02338; C02431; C02476; C02522; C02781; C07326; C08258; C08259; C08352; C16538; C20835; C20836	C6H12O5	-0.306602	0.0814718	0.158674	0.232651	-0.025524	0.951998	-0.0984791	0.215323	0.0557364	0.747723	0.217679	0.0590178	0.109127	0.921967	-
172	163.088	16891.4	0.205915	Fenuron	C11224	C9H12N2O	-0.333714	0.904672	0.0807884	0.653955	-0.114372	0.621825	-0.206076	0.0847573	0.0526834	0.864189	-0.0207266	0.963557	0.0437396	0.999213	-
173	164.021	3069.32	0.253716	4-Methylthiobutylthiohydroximate	C17243	C5H11NOS2	-0.0821636	0.96551	0.0220754	0.960693	0.214343	0.252674	-0.0244432	0.879531	-0.0987548	0.683461	0.0954107	0.108921	-0.00794881	0.999213	-
174	164.039	2768.4	0.476872	L-Methionine S-oxide; L-Methionine (R)-S-oxide; L-Methionine (S)-S-oxide	C02989; C15998; C15999	C5H11NO3S	-0.0290553	0.987896	0.0467231	0.711664	0.0199322	0.958686	-0.266833	0.00163956	0.0183493	0.93841	0.10804	0.144107	0.132682	0.791055	-
175	164.072	11081.1	0.625054	L-Phenylalanine; Phenylalanine; D-Phenylalanine; Benzocaine; Tricaine; Meto...	C00079; C02057; C02265; C07527; C18090; C18747; C19565; C19578; C20487; C20488	C9H11NO2	0.0384086	0.987896	0.0372164	0.698025	-0.042894	0.811647	-0.487851	0.00251165	-0.0212854	0.930222	0.0148696	0.892223	0.00733668	0.999213	-
176	165.018	4315.69	0.256618	Phthalate; 4-Hydroxyphenylglyoxylate; Terephthalate; 3-Formylsalicylic acid...	C01606; C03590; C06337; C14096; C14100	C8H6O4	-0.0825401	0.965625	0.00760377	0.967584	0.233187	0.0993956	0.342746	0.00645053	0.0274149	0.931144	0.146965	0.0357172	-0.0241441	0.999213	-
177	165.041	15446.9	0.24443	D-Xylonate; L-Arabinonate; D-Arabinonate; D-Ribonate; L-Xylonate; L-Lyxonat...	C00502; C00545; C00878; C01685; C05411; C05412; C16353; C16357; C16358	C5H10O6; C6H6N4O2	0.602017	0.000639953	0.214171	0.327463	0.140511	0.799456	0.584111	0.00354737	0.625467	0.000628097	0.819984	2.74585e-05	0.645551	0.00673406	-
178	165.055	31253.6	0.451686	3-(2-Hydroxyphenyl)propanoate; Tropate; Phloretate; Veratraldehyde; 3-Ethox...	C01198; C01456; C01744; C02201; C02363; C03080; C05581; C05607; C10712; C11380; C11457; C12206	C9H10O3	0.161347	0.139628	0.707223	0.019604	2.42688	0.00489361	5.03272	0.000519162	2.60997	0.000619039	2.85316	9.24927e-08	0.113512	0.999213	-
179	166.051	45970.6	0.306593	Pyridoxal; D-4-Hydroxyphenylglycine; 3-Hydroxy-4-methylanthranilate; 3-Meth...	C00250; C03493; C03986; C05831; C06051; C12323; C14170; C14171; C20821	C8H9NO3	0.0659946	0.96593	0.147503	0.173983	0.270473	0.0939886	0.807795	8.05789e-05	0.200834	0.151132	0.368492	0.00245814	-0.110084	0.446414	-
180	166.087	3462.13	0.598186	(-)-Sympatol; Synephrine; 3-Methoxytyramine; Metaraminol; Phenylephrine; Ep...	C01869; C04548; C05587; C07146; C07441; C07453; C07832; C08273; C19582	C9H13NO2	0.107705	0.927816	0.0941824	0.57803	0.0201506	0.964335	-0.251423	0.0235246	0.121982	0.483612	0.0393728	0.809598	0.0488914	0.999213	-
181	167.021	7333.86	-0.0272996	Urate	C00366	C5H4N4O3	-0.036106	0.987896	0.55776	0.712455	0.262717	0.273914	-0.0157614	0.904174	0.10126	0.880097	0.216189	0.604773	-0.127266	0.999213	-
182	167.036	3769.17	0.185577	Homogentisate; 3,4-Dihydroxyphenylacetate; Orsellinate; (S)-4-Hydroxymandel...	C00544; C01161; C01839; C03198; C03235; C05343; C05577; C06207; C06672; C07087; C10331; C11527; C14109; C16215; C18346	C8H8O4; C8H8O4.	-0.00630782	0.994449	-0.0225049	0.912017	-0.0365489	0.844062	-0.032502	0.669675	-0.0317498	0.898231	0.00720539	0.970938	0.0508089	0.999213	-
183	167.046	79540.1	0.573529	5-Nitro-ortho-anisidine	C19469	C7H8N2O3	-0.018286	0.991193	0.0324781	0.852878	-0.172798	0.0550839	-0.0927875	0.0871188	-0.0920753	0.622917	0.114875	0.548339	-0.0716543	0.999213	-
184	167.082	19409.3	0.546863	Pyridoxamine; Cyclo(deltaAla-L-Val); 4-PIOL	C00534; C11846; C13710	C8H12N2O2	0.23108	0.46575	0.0359338	0.776023	-0.110122	0.0635671	-0.186561	0.000746335	-0.149354	0.447156	0.0133615	0.948936	0.0437405	0.999213	-
185	167.997	35046.2	0.376486	L-Cysteate	C00506	C3H7NO5S	-0.0238107	0.987896	0.00756337	0.965418	0.102487	0.441291	0.134294	0.00857337	0.0449922	0.864855	0.0351597	0.717016	0.065525	0.999213	-
186	168.066	73580.7	0.396104	Pyridoxine; L-Noradrenaline	C00314; C00547	C8H11NO3	0.0977056	0.904672	0.0299439	0.737773	0.0436757	0.931569	-0.00158315	0.986092	0.0645345	0.823854	0.114834	0.185292	0.0596496	0.999213	-
187	168.078	4.12027e+06	0.288573	N(pi)-Methyl-L-histidine; Nalpha-Methylhistidine	C01152; C03298	C7H11N3O2	0.141387	0.593098	0.075628	0.660057	0.0294518	0.906947	0.0200509	0.810238	-0.0202485	0.94369	0.0602477	0.719837	0.0185324	0.999213	-
188	168.103	242260	0.576974	Piperidione	C17730	C9H15NO2	0.156726	0.784037	-0.0105331	0.960101	-0.21497	0.305088	-0.14513	0.197491	-0.225816	0.381914	0.0691652	0.799838	0.202946	0.304304	-
189	169.014	105166	0.12615	Gallate	C01424	C7H6O5	-0.313728	0.117374	0.132905	0.363639	0.117071	0.511324	0.303693	0.00479783	0.244414	0.0646021	-0.0281588	0.740228	-0.0563232	0.999213	-
190	169.062	23754.7	0.560772	N-Nitrosoguvacoline	C19482	C7H10N2O3	0.276277	0.833862	0.0617771	0.177385	-0.0235742	0.816085	-0.119095	0.0116348	0.0353083	0.951994	0.0398467	0.812542	-0.0183353	0.999213	-
191	169.098	10021.6	0.400758	Levetiracetam	C07841	C8H14N2O2	0.0280875	0.987896	0.06294	0.640713	-0.340985	0.00492153	-0.262348	0.0208336	-0.250107	0.0811541	-0.338026	0.000112242	-0.0108405	0.999213	-
192	170.046	14092.5	0.50211	2,3,4,5-Tetrahydrodipicolinate; 5-Amino-5-deoxy-3-dehydroshikimate; 2-Formy...	C03972; C12108; C17356	C7H9NO4	0.471035	0.149308	0.248277	0.0695552	-0.027875	0.951998	0.0795836	0.401925	1.20458	0.000686478	0.340835	0.0357172	0.309023	0.132575	-
193	170.057	5347.56	0.632492	Metronidazole	C07203	C6H9N3O3	0.287334	0.46575	0.105017	0.165416	-0.142465	0.0825115	-0.0260894	0.575755	0.123148	0.409819	0.428394	0.0167854	0.256768	0.716659	-
194	171.006	9039.84	0.32509	sn-Glycerol 3-phosphate; sn-Glycerol 1-phosphate; Glycerol 2-phosphate; DL-...	C00093; C00623; C02979; C03189	C3H9O6P	-0.892291	0.000320957	0.840489	0.00212247	0.686033	0.0411788	0.428981	0.00738878	0.378437	0.00366207	0.145753	0.0954991	0.237019	0.130908	-
195	171.03	151926	0.384686	3-Dehydroshikimate; 5-Dehydroshikimate; 2-Oxohept-3-enedioate; 2-Hydroxyhep...	C02637; C02652; C03063; C05600; C07478; C07479; C18306; C18318	C7H8O5	0.627911	0.000320957	0.0846055	0.503695	0.109492	0.397328	-0.0806265	0.151469	0.722635	0.000599931	0.193795	0.0412816	-0.0316718	0.999213	-
196	171.041	8329.47	0.455187	Hydantoin-5-propionate; (R)-AMAA	C05565; C13739	C6H8N2O4	0.14096	0.525417	0.0955979	0.627516	-0.0700241	0.89934	-0.235683	0.070472	0.0837393	0.611322	0.0449065	0.604773	0.110538	0.999213	-
197	171.103	10045	0.420794	9-Oxononanoic acid	C16322	C9H16O3	-0.00559567	0.994449	-0.157121	0.133434	-0.113296	0.511476	-0.407937	0.00124545	-0.104164	0.200538	-0.146362	0.303487	-0.0942052	0.906722	-
198	171.139	200777	0.131296	Decanoic acid; p-Menthane-3,8-diol; Isoamyl isovalerate; Ethyl octanoate	C01571; C02904; C12289; C12292	C10H20O2	0.368667	0.00728341	0.0686811	0.653955	-0.115655	0.202713	-0.255263	0.0303539	0.244484	0.113947	0.0462641	0.690443	0.305384	0.0465953	-
199	172.053	7762.98	0.585877	Allidochlor	C19043	C8H12ClNO	0.052222	0.987896	0.0862206	0.698025	-0.0611154	0.648834	-0.0221903	0.749483	0.802196	0.0437326	0.0970389	0.607665	0.00509222	0.999213	-
200	172.062	5280.12	0.412074	N-Acetyl-L-glutamate 5-semialdehyde; 5-Deoxy-5-aminoshikimic acid; (2S,5S)-...	C01250; C12121; C17366	C7H11NO4	0.0983977	0.858965	0.150913	0.192504	-0.0481232	0.89585	-0.0931102	0.280594	2.12875	0.00110633	0.11612	0.325675	0.0303065	0.999213	-
201	172.098	139360	0.366198	N-Acetyl-L-leucine; Swainsonine	C02710; C10173	C8H15NO3	0.353179	0.0485357	0.0583753	0.769139	-0.608928	0.0120082	-0.590611	0.00594254	1.6346	0.000751768	2.20926	8.11431e-07	0.0251134	0.999213	-
202	172.109	8147.63	0.5025	Indospicine	C08288	C7H15N3O2	0.258362	0.507406	0.0655427	0.801654	-0.408437	0.124596	-0.283622	0.0812277	0.677303	0.00946817	1.10604	6.72777e-06	-0.06781	0.999213	-
203	173.008	5363.65	0.559843	cis-Aconitate; trans-Aconitate; Dehydroascorbate	C00417; C02341; C05422	C6H6O6	0.649482	0.00115313	0.279554	0.00219889	1.04914	0.0609054	1.74186	0.0307501	-0.491904	0.0133094	-0.55549	0.00261582	0.514162	0.0242011	x
204	173.026	9109.27	0.220171	3-Fluorocyclohexadiene-cis,cis-1,2-diol-1-carboxylate; 5-Fluorocyclohexadie...	C16478; C16479; C16480; C16481; C16482	C7H7FO4	0.0375102	0.987896	0.419721	0.0266719	1.01534	0.0624696	2.98703	0.00224942	-0.152462	0.478047	-0.0191568	0.944449	0.0845877	0.999213	-
205	173.046	67960.2	0.344759	Shikimate; (2S)-2-Isopropyl-3-oxosuccinate; 2-Oxopimelate; 2-Methyl-3-oxoad...	C00493; C04236; C16588; C18307; C18312	C7H10O5	-0.0413024	0.959728	0.146684	0.437912	0.0678626	0.899491	1.39259	0.00213416	0.086505	0.626438	0.0262612	0.803324	-0.0100847	0.999213	-
206	173.057	2.72769e+06	0.545613	N-Formimino-L-glutamate; Formylisoglutamine	C00439; C16674	C6H10N2O4	0.00503199	0.994449	0.266162	0.121687	-0.106798	0.791791	0.214015	0.0790817	0.230572	0.122199	0.524128	0.00642455	-0.0834574	0.937018	-
207	173.081	162988	0.725891	Suberic acid; Dimethyl adipate; 2-Propylglutaric acid; Dimethoxane	C08278; C14570; C16658; C19402	C8H14O4	0.0494979	0.904672	0.0953876	0.412186	-0.359375	0.000626231	0.034574	0.63749	-0.118711	0.350908	-0.0627592	0.550207	0.0118132	0.999213	-
208	173.093	48508	0.5129	N-Acetylornithine; N5-Ethyl-L-glutamine	C00437; C01047	C7H14N2O3	0.0322602	0.904672	0.10363	0.603188	-0.931601	0.000845356	-0.286906	0.0220353	-0.392876	0.00132136	-0.463312	1.20322e-05	-0.0309612	0.999213	-
209	173.104	9749.92	0.67874	L-Arginine; D-Arginine; Amino acid(Arg-)	C00062; C00792; C02385	C6H14N4O2	0.0429924	0.914867	0.0242066	0.73643	0.0475355	0.4681	-0.0892065	0.149658	-0.0945057	0.282709	-0.0351712	0.692467	0.0265881	0.999213	-
210	173.141	6380.15	0.618942	Muscarine	C07473	C9H20NO2	0.0556988	0.927816	0.0921911	0.44147	0.0724891	0.562291	0.656396	0.000801101	-0.172706	0.292107	-0.0668331	0.573566	0.0297509	0.999213	-
211	174.04	5573.7	0.573011	N-Acetyl-L-aspartate; N-Formyl-L-glutamate; 2-Amino-3-oxoadipate	C01042; C01045; C05520	C6H9NO5	0.185943	0.34541	0.21249	0.170419	0.114463	0.81722	0.159003	0.201171	0.345513	0.00861091	0.328411	0.00102049	-0.00608077	0.999213	-
212	174.056	25651.1	0.459893	Indole-3-acetate; NH2Mec; N-Acetylindoxyl; (Indol-3-yl)glycolaldehyde; 5-Hy...	C00954; C01386; C02298; C03230; C05634; C06331; C06344; C06525; C11504	C10H9NO2	0.0732569	0.941181	0.28347	0.0282767	0.0941696	0.632537	0.174311	0.078594	0.108023	0.639625	0.116266	0.596065	0.047518	0.999213	-
213	174.077	158462	0.414589	Calystegin B2	C10851	C7H13NO4	-0.000207182	0.999369	0.101217	0.65362	-0.0403715	0.94594	-0.12273	0.291831	-0.00124856	0.991303	0.0363501	0.729128	0.0663984	0.999213	x
214	174.089	12348.8	0.29347	L-Citrulline	C00327	C6H13N3O3	0.018962	0.987896	0.133068	0.412186	-0.141996	0.625655	-0.0679706	0.394572	-0.133511	0.387467	0.186251	0.0125023	0.0345345	0.999213	-
215	174.98	3190.21	NA	2-Chloro-cis,cis-muconate; 3-Chloro-cis,cis-muconate; 2-Chloro-2,5-dihydro-...	C03572; C03585; C04522; C07089; C16266	C6H5ClO4	0.0180309	0.987896	0.0448652	0.849905	0.548851	0.00146002	1.22756	0.000229278	-0.0698413	0.809772	0.132857	0.12801	-0.0175673	0.999213	-
216	175.025	6956.22	0.393105	Ascorbate; D-Glucuronolactone; 2-Hydroxy-3-oxoadipate; L-xylo-Hexulonolacto...	C00072; C02670; C03217; C03289; C03387; C04053; C04349; C04471; C06033; C06430; C06440; C19806; C20364	C6H8O6	1.15049	1.10971e-05	0.0606643	0.80029	-0.0275856	0.963961	1.61886	0.000146335	0.0820132	0.666084	0.11481	0.296462	-0.0511664	0.999213	-
217	175.051	98332.5	0.474676	4-Hydroxyaminoquinoline N-oxide; Pemoline	C04050; C07899	C9H8N2O2	0.241549	0.374807	0.0640428	0.760227	-0.153319	0.338107	0.0817603	0.205805	-0.00630949	0.971079	0.0171569	0.954769	0.193779	0.840024	-
218	175.061	9603.08	0.346807	3-Propylmalate; alpha-Isopropylmalate; (R)-2-(n-Propyl)-malate; (2R,3S)-3-I...	C02123; C02504; C03328; C04411	C7H12O5	0.151731	0.721535	0.267154	0.0820856	-0.0955615	0.82039	0.102638	0.412008	0.266919	0.228936	0.123937	0.459009	1.17776	2.31461e-05	-
219	175.072	9602.09	-0.119489	D-Alanyl-D-serine	C19719	C6H12N2O4	0.0876787	0.927803	0.11845	0.613223	-0.827702	0.00278651	-0.198378	0.173795	-0.16234	0.716238	-0.0534478	0.701334	0.131238	0.999213	-
220	175.087	19881.7	0.404249	Serotonin; N-Hydroxyl-tryptamine	C00780; C17203	C10H12N2O	0.109543	0.345374	0.163731	0.0825017	-0.358599	0.00230954	-0.115463	0.0324544	-0.2299	0.194102	-0.185073	0.393278	-0.101838	0.999213	-
221	175.098	137511	0.428278	L-Cladinose; Metaldehyde	C11917; C18744	C8H16O4	0.225555	0.117374	0.0651422	0.71702	-0.469451	0.00862935	-0.171195	0.0352731	-0.268484	0.130835	-0.113666	0.352102	-0.0248961	0.999213	-
222	176.056	5060.72	0.561676	4-Hydroxy-4-methylglutamate; 3-Keto-scyllo-inosamine; (2Z,4S,5R)-2-Amino-4,...	C06034; C17576; C20844; C20845	C6H11NO5	0.0802861	0.941181	0.135852	0.426289	0.0726705	0.869339	-0.178075	0.0785418	-0.176348	0.164182	0.0180692	0.815151	0.155085	0.716659	-
223	176.083	17443.3	0.497875	N'-Nitrosonornicotine	C16452	C9H11N3O	0.168433	0.705239	0.104647	0.675144	-0.208216	0.111354	0.0130205	0.837717	-0.14058	0.56576	0.0270106	0.939842	-0.0322099	0.999213	-
224	177.02	6950.73	0.448542	7,8-Dihydroxycoumarin; 5,7-Dihydroxychromone; Esculetin; Caffeoquinone	C03093; C09001; C09263; C16828	C9H6O4	-0.00235469	0.994449	0.343044	0.0228729	0.116695	0.517038	0.130271	0.247465	0.184993	0.289908	0.132655	0.170181	0.0354343	0.999213	-
225	177.04	20975.9	0.30082	D-Glucono-1,5-lactone; 2-Dehydro-3-deoxy-D-gluconate; 5-Dehydro-D-fructose;...	C00198; C00204; C00273; C00691; C01040; C01115; C01216; C02669; C02692; C02779; C03107; C03269; C03383; C03926; C05394; C05410; C06892; C16737; C17577; C19679; C20251; C20680	C6H10O6	0.3252	0.0347899	-0.541504	0.0192395	2.54787e-05	0.999859	-0.200287	0.0875581	0.0960669	0.457178	-0.162728	0.115439	0.199144	0.152289	-
226	177.047	38898	0.703786	Cyclamate	C19378	C6H12NO3S.	0.145417	0.533642	-0.269498	0.0111752	-0.0604716	0.82039	-0.0337108	0.767717	0.00427498	0.985114	0.00250579	0.982742	0.0517082	0.88231	-
227	177.056	341821	-0.00518367	Vermelone; Coniferyl aldehyde; 3-Acetyl-6-methoxybenzaldehyde; 1,2-Dihydrox...	C01624; C02666; C10667; C14784; C20327; C20646	C10H10O3	0.168049	0.0326089	-0.110599	0.341918	0.0168846	0.957309	0.0537987	0.430406	0.00887744	0.962724	0.12427	0.297536	0.00238505	0.999213	-
228	177.067	21721.7	-0.0842347	Phenacemide	C07428	C9H10N2O2	0.121754	0.823737	-0.00514578	0.976497	-0.0137811	0.963961	0.0832118	0.121206	-0.0450132	0.864855	0.0252177	0.939741	-0.00116635	0.999213	-
229	177.103	14064.7	-0.0527126	(S)-6-Hydroxynicotine; (R)-6-Hydroxynicotine; Glycinexylidide; Pseudooxynic...	C01056; C03043; C16569; C20361	C10H14N2O	-0.00187418	0.994449	0.0490274	0.77529	-0.0700567	0.697253	-0.135667	0.139713	-0.167229	0.442427	0.108678	0.593858	0.0377122	0.999213	-
230	178.036	227376	0.620276	Isoxanthopterin	C03975	C6H5N5O2	0.119466	0.892623	-0.0243147	0.919434	-0.0429358	0.89585	-0.0712587	0.402443	-0.00173932	0.990951	0.0990174	0.381362	0.0720299	0.999213	-
231	178.087	19490.7	0.223643	Phenacetin; (-)-Salsolinol; Fusaric acid; Xylylcarb; L-Homophenylalanine; X...	C07591; C09642; C10146; C14579; C17235; C18771; C18887	C10H13NO2	0.12921	0.575139	0.035389	0.767325	-0.0478164	0.665358	-0.141599	0.0344971	-0.146017	0.555652	0.117239	0.438605	0.11542	0.999213	-
232	179.035	42604.9	0.162041	3-(4-Hydroxyphenyl)pyruvate; Caffeate; Aspirin; Caffeate; 2-Hydroxy-3-(4-hy...	C01179; C01197; C01405; C01481; C05350; C12623; C13400	C9H8O4; C9H8O4.	-0.16035	0.239071	0.151882	0.345453	0.127	0.725708	-0.503904	0.00145467	1.02873	0.00220575	-0.322731	0.000165966	-0.141542	0.795727	x
233	179.056	8081.74	0.216946	D-Glucose; D-Fructose; D-Galactose; myo-Inositol; D-Mannose; beta-D-Glucose...	C00031; C00095; C00124; C00137; C00159; C00221; C00247; C00267; C00737; C00738; C00764; C00795; C00936; C00962; C00984; C01452; C01487; C01582; C01680; C01719; C01720; C01825; C01906; C01934; C02209; C02336; C02782; C05003; C06152; C06153; C06464; C06465; C06466; C06467; C06468; C08351; C08356; C10906; C15923; C19891	C6H12O6	-0.151523	0.0221845	0.0844653	0.730859	-0.124979	0.828859	-0.601251	0.00767302	-1.21312	0.000599931	-1.58828	1.025e-05	0.080006	0.999213	-
234	179.119	13529	0.269777	Rilmenidine	C11120	C10H16N2O	-0.0365772	0.987896	0.10234	0.485651	-0.129574	0.00705923	-0.249023	0.0395782	-0.158181	0.481852	-0.0151782	0.940261	0.0644864	0.999213	-
235	180.067	30634.5	0.558684	L-Tyrosine; Tyrosine; L-threo-3-Phenylserine; 3-Amino-3-(4-hydroxyphenyl)pr...	C00082; C01536; C03290; C04368; C06420; C19579; C19712; C20807	C9H11NO3	0.021505	0.987896	0.0538545	0.727459	0.0559443	0.817383	-0.373354	0.000887114	0.0315928	0.867926	0.0509924	0.467314	0.0427368	0.999213	-
236	181.05	7445.13	0.241167	3-(4-Hydroxyphenyl)lactate; (R)-3-(4-Hydroxyphenyl)lactate; 3-(2,3-Dihydrox...	C03672; C03964; C04044; C05582; C05583; C10447; C10680; C12622	C9H10O4	-0.0377407	0.987896	0.133263	0.391112	1.9523	0.00532506	3.33556	0.000447906	4.36162	0.000670439	1.52992	7.6083e-06	0.0876687	0.999213	-
237	181.071	10854	0.732368	Mannitol; D-Sorbitol; D-Iditol; L-Iditol; Galactitol; L-Glucitol	C00392; C00794; C01489; C01507; C01697; C01722	C6H14O6	0.035523	0.987896	0.0718316	0.232651	-0.00216106	0.995251	-0.25733	0.000420769	0.0566498	0.643781	0.0898346	0.170181	0.0211117	0.999213	-
238	182.012	47668.1	0.401662	L-Homocysteic acid	C16511	C4H9NO5S	-0.017811	0.987896	0.0565897	0.71702	0.000442923	0.996123	0.0596652	0.602646	-0.154159	0.350908	0.0650667	0.388981	0.0500317	0.999213	-
239	182.994	36317.4	0.824841	2-Pyrone-4,6-dicarboxylate; Chelidonic acid	C03671; C08476	C7H4O6	0.0920963	0.799462	0.14279	0.0834764	0.0298527	0.858082	-0.0621506	0.13234	-1.44399	0.00131861	-1.25552	0.00231097	-0.0109189	0.999213	-
240	183.057	24940.5	0.272766	Fuberidazole	C18737	C11H8N2O	-0.0825018	0.960224	0.100664	0.613223	-0.00266295	0.990596	0.302548	0.00527806	0.783677	0.00210851	0.0804261	0.689719	0.0506415	0.999213	-
241	183.102	1933.28	0.271315	5-exo-Hydroxy-1,2-campholide; 1,6,6-Trimethyl-2,7-dioxabicyclo[3.2.2]nonan-...	C03843; C04718; C06066; C11405; C11419; C19079; C19084; C20324	C10H16O3	-0.0645252	0.986291	-0.0130073	0.960101	-0.384974	0.0530497	-1.00029	0.000542916	-0.00200193	0.991303	-0.182576	0.187154	0.0892812	0.999213	-
242	184.002	2697	0.57517	O-Phospho-L-serine; O-Phospho-D-serine	C01005; C02532	C3H8NO6P	0.0566213	0.987896	0.0141239	0.960101	0.135723	0.562291	-0.209548	0.116138	-0.0295564	0.886483	0.00379102	0.970422	0.0277723	0.999213	-
243	184.024	5757.48	-0.372191	2-Amino-3-carboxymuconate semialdehyde	C04409	C7H7NO5	0.323185	0.300267	0.469683	0.76306	0.309504	0.388847	-0.322064	0.305228	0.188727	0.303586	0.110624	0.352102	0.0238062	0.999213	-
244	184.097	2406.75	0.565933	Otonecine; Ecgonine; Pseudoecgonine; N-Isovaleryl-L-homoserine lactone	C10356; C10858; C12449; C20673	C9H15NO3	0.140683	0.789956	0.117723	0.495265	-0.0934796	0.788889	-0.18409	0.0138879	-0.0829833	0.740385	0.155832	0.207691	0.172108	0.304304	-
245	184.109	7130.12	0.67749	Isocarbamid	C19047	C8H15N3O2	0.0665018	0.987896	0.0718024	0.121687	-0.213901	0.0560588	-0.339043	0.000305911	-0.065889	0.723431	-0.0353048	0.816765	0.0036289	0.999213	-
246	184.991	8864.05	0.693266	4-Sulfobenzaldehyde	C06679	C7H6O4S	-0.0263092	0.987896	0.0744907	0.397015	-0.182532	0.0629841	-0.567586	4.03961e-06	-0.529376	0.0205205	-0.466762	0.0218615	0.0958852	0.791055	-
247	185.025	47176.8	0.200344	Angelicin; Psoralen	C09060; C09305	C11H6O3	0.280068	0.91212	0.0637025	0.73643	0.21425	0.203865	-0.120425	0.0324544	-0.0174213	0.941388	0.0970646	0.310326	0.0473492	0.999213	-
248	185.057	32562.9	0.26851	AMPA	C13672	C7H10N2O4	0.053848	0.947611	0.0978077	0.660057	-0.131484	0.680165	-0.613834	0.00736436	-0.676526	0.00340286	-0.744499	7.66543e-06	0.167297	0.716659	x
249	185.118	11411	0.435556	10-Oxodecanoate; (3R)-6-Hydroxy-3-isopropenyl-heptanoate; (5R)-6-Hydroxy-5-...	C02217; C11404; C11406; C11417; C11420; C13945; C17620; C20714	C10H18O3	0.0692176	0.987454	-0.0681488	0.613223	-0.106612	0.162722	-0.184972	0.034733	-0.0218918	0.94314	0.124111	0.185494	-0.00519842	0.999213	-
250	186.041	5069.59	NA	2-(Acetamidomethylene)succinate; (2S,4S)-4-Hydroxy-2,3,4,5-tetrahydrodipico...	C01215; C20258	C7H9NO5	0.170554	0.666131	0.178762	0.154737	1.37884	0.108837	3.73141	0.0119222	0.581188	0.00413161	0.567107	0.000256585	0.150861	0.446414	-
251	186.077	23911.3	0.250913	6-Acetamido-3-oxohexanoate; 6-Acetamido-2-oxohexanoate; N-(3-(S)-Hydroxybut...	C03682; C05548; C11842; C12988	C8H13NO4	0.00553571	0.994449	0.0965573	0.569218	-0.120211	0.655348	-0.0127037	0.904174	-0.00400353	0.985114	-0.129543	0.20104	-0.0536248	0.999213	x
252	186.088	6161.01	0.33574	5-Guanidino-3-methyl-2-oxopentanoate	C20234	C7H13N3O3	0.0791392	0.986874	0.108888	0.591471	-0.221213	0.0493864	-0.0715608	0.165518	-0.0508747	0.864293	0.0143879	0.956176	-0.0270676	0.999213	-
253	186.096	11706.1	0.626287	Molinate	C11086	C9H17NOS	0.162961	0.690898	0.0829698	0.632261	-0.418072	0.024692	-0.42435	0.22939	0.591836	0.00455576	0.571369	0.000136876	0.151871	0.45982	-
254	186.114	3383.17	0.465506	8-Amino-7-oxononanoate; (E)-2-Butenyl-4-methyl-threonine	C01092; C12029	C9H17NO3	0.248193	0.0995564	0.0721484	0.769139	-0.938486	0.000626231	-0.928828	0.000605111	0.574417	0.00266142	0.282301	0.128122	0.150679	0.772326	-
255	186.939	3919.5	-0.254107	4-Bromocatechol; 4-Bromophenol-2,3-epoxide	C14843; C14845	C6H5BrO2	-0.0138333	0.991193	0.00418049	0.989331	0.141569	0.486702	0.157158	0.228677	1.42325	3.97995e-06	1.00102	6.2375e-05	-0.0501232	0.999213	-
256	187.006	6147.61	0.141677	4-Sulfobenzyl alcohol	C06678	C7H8O4S	-0.0761322	0.986291	0.173793	0.580092	0.358607	0.54784	2.10553	0.00823136	-0.0503112	0.858699	0.0762621	0.544138	0.0479481	0.999213	-
257	187.026	7713.18	0.439009	(Z)-But-1-ene-1,2,4-tricarboxylate; (Z)-But-2-ene-1,2,3-tricarboxylate; (E)...	C04002; C04225; C11514; C11515; C16579	C7H8O6	0.0402121	0.987896	0.203785	0.208906	0.714479	0.158441	2.76165	0.00508128	0.344892	0.246588	0.0720191	0.726401	-0.0373678	0.999213	-
258	187.109	13504	-0.176835	Glycyl-leucine; N6-Acetyl-L-lysine; 6-Acetamido-3-aminohexanoate; N2-Acetyl...	C02155; C02727; C03846; C12989	C8H16N2O3	-0.00704019	0.991193	0.135958	0.516313	-1.81509	0.000626231	-0.329203	0.0446433	-0.612033	0.00184646	-1.33588	9.17445e-06	-0.0301819	0.999213	x
259	187.135	18487.5	0.487366	10-Hydroxydecanoic acid; 6-Hydroxy-3,7-dimethyloctanoate	C02774; C18067	C10H20O3	-0.0434727	0.987896	0.30933	0.0396655	-0.846994	0.00141732	0.129648	0.32181	-0.108702	0.639625	-0.0849445	0.591212	-0.0895464	0.999213	-
260	188.002	20132.1	0.489711	2-Pyridyl hydroxymethane sulfonic acid	C11327	C6H7NO4S	0.0230485	0.987896	0.18768	0.436477	0.0471525	0.951998	0.214288	0.0891253	0.091355	0.389436	-0.099794	0.352102	-0.0188674	0.999213	-
261	188.036	1.23767e+06	0.171754	4-Hydroxy-2-quinolinecarboxylic acid; N-Acetylisatin; 1-Nitronaphthalene-5,...	C01717; C02172; C14800; C14802; C16715; C18621	C10H7NO3	-0.0619117	0.892623	0.138783	0.650367	0.0169481	0.971343	0.924675	0.0110464	0.452346	0.0130349	0.151055	0.338201	0.11243	0.999213	-
262	188.057	2.63256e+07	0.597548	N-Acetyl-L-glutamate; L-2-Amino-6-oxoheptanedioate; AminoDHQ	C00624; C03871; C12109	C7H11NO5	1.19979	0.00253718	0.204647	0.314058	-0.0835494	0.89585	0.352025	0.0201529	3.37622	0.000619039	0.399953	0.00851881	0.124752	0.999213	-
263	188.068	4.10974e+06	0.624039	N-Amidino-L-glutamate	C03140	C6H11N3O4	0.35878	0.0676646	0.151625	0.463232	-0.471532	0.0414999	0.046951	0.709825	1.88774	0.000599931	0.240528	0.0483865	0.0775518	0.798271	-
264	188.071	2.04285e+06	0.44292	Phensuximide; 6,7-Dimethoxyisoquinoline; 1,3-Dimethyl-6,8-isoquinolinediol;...	C07437; C09348; C12345; C20635	C11H11NO2	0.261206	0.148304	0.169835	0.389289	-0.395828	0.0635671	0.0875272	0.584746	1.59714	0.000599931	0.15584	0.365891	0.0470964	0.999213	-
265	188.093	2.01273e+06	0.621741	Castanospermine; (2S)-2-{[1-(R)-Carboxyethyl]amino}pentanoate; Alexine; Aus...	C02256; C06326; C10124; C10132; C11843	C8H15NO4	0.0708555	0.904672	0.137993	0.454493	0.223887	0.515463	0.0513286	0.644289	-0.0824683	0.524672	0.063032	0.43924	0.0985786	0.893369	x
266	188.112	486552	-0.0907747	EPTC; 8-Methylthiooctanaldoxime	C11081; C17251	C9H19NOS	-0.0300087	0.987896	0.133139	0.500756	-1.58578	0.000626231	-0.334154	0.0316198	-0.510584	0.000803165	-1.17526	1.7741e-06	-0.0809826	0.999213	-
267	189.031	1.27123e+06	-0.680956	4-Nitroquinoline N-oxide	C03474	C9H6N2O3	0.0123407	0.994449	0.145345	0.232651	-0.287302	0.0200033	0.304282	0.00241196	0.788669	0.00347449	1.02665	0.00409785	0.0353021	0.999213	-
268	189.067	615650	0.481897	Indole-3-acetaldoxime N-oxide	C17204	C10H10N2O2	0.300787	0.116853	0.128181	0.304279	-0.199136	0.327944	0.270445	0.0511577	0.408474	0.0125744	-0.011332	0.966865	0.095245	0.999213	-
269	189.077	282562	0.229503	(R)-3-((R)-3-Hydroxybutanoyloxy)butanoate	C04546	C8H14O5	0.234566	0.239071	0.208007	0.309615	-0.146346	0.797858	-0.0164269	0.921084	0.201183	0.137199	0.0533512	0.804596	0.0486758	0.999213	-
270	189.088	178650	0.0456003	LL-2,6-Diaminoheptanedioate; meso-2,6-Diaminoheptanedioate	C00666; C00680	C7H14N2O4	0.0923822	0.533642	0.127671	0.653955	-2.06525	0.00076934	-0.200593	0.221905	-0.707158	0.000862564	-0.760844	1.21923e-05	-0.0409807	0.999213	-
271	189.102	119074	0.288007	5-Methoxytryptamine; N-Methylserotonin; Cytisine; 2-Methyl-5-hydroxytryptamine	C05659; C06212; C10763; C13665	C11H14N2O	0.156182	0.5565	0.12948	0.489599	-0.408771	0.00709811	-0.115878	0.084051	-0.380915	0.0325393	-0.221474	0.249519	-0.164453	0.759535	-
272	190.054	138564	0.447133	N-Acetylmethionine	C02712	C7H13NO3S	0.173702	0.359097	0.24558	0.103536	0.422552	0.110563	-0.385362	0.0219205	1.16507	0.000207212	1.55355	8.11431e-07	0.812984	0.00892971	-
273	190.061	85549.2	0.0705623	Carbendazim	C10897	C9H9N3O2	0.230657	0.031148	0.112719	0.480938	0.223935	0.338107	0.276377	0.0580016	0.648961	0.000670439	0.558628	0.00353461	0.265334	0.0466193	-
274	190.072	61841.3	0.460141	2-Amino-3,7-dideoxy-D-threo-hept-6-ulosonic acid	C16850	C7H13NO5	0.277383	0.0326089	0.128643	0.485651	0.0286613	0.971343	-0.119098	0.323131	0.358474	0.0276436	0.309037	0.00143572	0.267265	0.25339	-
275	190.09	94679.9	0.461938	Trihomomethionine	C17221	C8H17NO2S	0.00959966	0.994449	0.0590673	0.767325	-1.08891	0.000685966	-0.229967	0.123511	-0.0281635	0.864855	-0.225821	0.233293	-0.121638	0.999213	-
276	191.02	58446.8	0.594022	Citrate; Isocitrate; (1R,2S)-1-Hydroxypropane-1,2,3-tricarboxylate; 5-Dehyd...	C00158; C00311; C00451; C00679; C02780; C03600; C03921; C04575; C04617; C12649	C6H8O7; C6H8O7.	0.174216	0.634019	0.124193	0.277814	-0.00254089	0.995251	-3.14276	0.000257065	-2.01731	0.00142211	-2.30775	7.87938e-05	0.78019	0.0393217	x
277	191.036	57653.6	0.272775	Scopoletin; Naphthazarin; 3,4-Dehydro-6-hydroxymellein; 1,3,6,8-Naphthalene...	C01752; C01938; C03830; C04033; C06203; C06204; C10290; C16913; C18077; C18079; C20462	C10H8O4	0.0934705	0.959767	0.0500681	0.841085	0.206045	0.400344	-1.88358	0.000125279	-1.4075	0.000799826	-1.32113	0.000275241	0.691984	0.0908662	-
278	191.056	52899.7	0.214854	Quinate; 2D-5-O-Methyl-2,3,5/4,6-pentahydroxycyclohexanone; Valiolone	C00296; C01295; C12113	C7H12O6	-1.54543	0.00031891	0.115867	0.697991	-0.0795217	0.897943	-0.487924	0.0188765	0.0281983	0.853599	-1.30134	5.83946e-06	0.145273	0.70316	x
279	191.082	47977.3	0.474589	Acanthicifoline; 2,6-Dihydroxy-N-methylmyosmine	C09907; C16151	C10H12N2O2	0.143324	0.46575	0.125146	0.30153	-0.138434	0.192013	-0.261989	0.0457418	-0.339953	0.0445177	-0.145901	0.539883	0.125072	0.981279	-
280	192.068	45288.3	0.499628	(3-Arylcarbonyl)-alanine; Phenylacetylglycine; 5,6-Dihydroxy-3-methyl-2-oxo...	C03450; C05598; C06726; C09962; C10581; C16587; C16595	C10H11NO3	0.0483351	0.987896	-0.0378849	0.851043	-0.430932	0.00529933	-0.276713	0.0237302	0.090746	0.587354	0.0385882	0.793685	0.0081216	0.999213	-
281	193.035	41986.9	0.259032	D-Glucuronate; D-Galacturonate; D-Tagaturonate; 3-Dehydro-L-gulonate; D-Fru...	C00191; C00333; C00558; C00618; C00905; C01062; C02024; C03342; C06472; C06473; C06477; C08348; C08350; C15673; C16245	C6H10O7	0.338761	0.0759231	0.129648	0.487849	0.128303	0.675659	-0.283846	0.0349171	0.273217	0.074813	0.347888	0.00906613	0.368673	0.0830324	-
282	193.073	39439.1	0.657952	5-O-Methyl-myo-inositol; Methyl beta-D-galactoside; 1-O-Methyl-myo-inositol...	C03365; C03619; C03659; C03660; C03844; C05163; C06352; C06353; C07481; C08257; C13403	C7H14O6; C8H10N4O2; C8H10N4O2.	0.0704378	0.959728	0.0942453	0.244119	-0.0150744	0.941809	-0.0996542	0.070472	-0.0337717	0.886483	-0.017044	0.928696	0.0140365	0.999213	-
283	193.087	39136.4	0.298882	Zingerone; Isobutylparaben	C17497; C20342	C11H14O3	-0.0097308	0.994449	-0.031345	0.733814	-0.0115054	0.890624	-0.0720347	0.0838686	0.153535	0.56576	0.0723616	0.726161	-0.0445235	0.999213	-
284	193.098	39377.9	0.555268	6-Hydroxypseudooxynicotine; Pilocarpidine	C01297; C17964	C10H14N2O2	0.237246	0.563499	0.0459065	0.763577	-0.351127	0.00922788	-0.269033	0.0243772	-0.0484736	0.864855	-0.0145773	0.970136	-0.0236963	0.999213	-
285	194.046	37045	0.554446	Dopaquinone; 1,2-Epoxy-3-(p-Nitrophenoxy)propane; 2-Carboxy-2,3-dihydro-5,6...	C00822; C04274; C05604; C07588; C19631	C9H9NO4	0.194183	0.525607	0.00918077	0.960693	0.00362638	0.994261	0.0304156	0.740542	0.0949505	0.682452	0.22534	0.0245361	0.145218	0.650234	-
286	194.094	35867.3	0.242054	alpha-[3-(Nitrosoamino)propyl]-3-pyridinemethanol	C19581	C9H13N3O2	0.115274	0.508538	0.0300371	0.894146	-0.0305828	0.882486	-0.244008	0.00736436	0.0194501	0.94369	0.0412164	0.376601	-0.00704282	0.999213	-
287	195.017	33198.3	-0.0094593	Tetrahydroxypteridine; Xanthine-8-carboxylate	C03178; C03314	C6H4N4O4	0.396832	0.00509182	-3.19271	0.0023439	0.0985643	0.890853	-0.139887	0.201566	0.194027	0.231753	-0.635385	0.000764965	0.0310728	0.999213	-
288	195.051	32196.1	0.470992	D-Gluconic acid; D-Mannonate; L-Idonate; L-Gulonate; D-Altronate; D-Galacto...	C00257; C00514; C00770; C00800; C00817; C00880; C03215; C15930	C6H12O7	0.468299	0.00115313	-5.81065	0.00225564	0.0181119	0.990066	-0.107134	0.473747	0.218825	0.0802613	-0.779461	9.59541e-06	0.0255144	0.999213	-
289	195.113	30862	0.439974	Fasoracetam	C13311	C10H16N2O2	0.616476	0.00857051	-1.42691	0.00487514	0.0304835	0.966198	-0.184219	0.202833	0.198777	0.219924	-0.560803	0.0009068	0.105184	0.759128	-
290	196.03	28441	0.523614	Tauropine	C01616	C5H11NO5S	0.192551	0.507406	-1.0734	0.000169313	0.0598908	0.899491	-0.108633	0.228847	0.105486	0.621936	-0.263543	0.00102049	0.00597182	0.999213	-
291	196.994	11884.3	0.431125	2-Oxopropyl-CoM	C11497	C5H10O4S2	0.0303335	0.987896	-0.0353161	0.88458	0.0503869	0.937933	0.116129	0.385455	-0.0407779	0.846918	0.0933221	0.210731	-0.00465769	0.999213	-
292	197.071	8659.49	0.413657	N-Nitrosodiphenylamine; 4-(2-Pyrazinylethenyl)phenol; 4-Hydroxyazobenzene; ...	C14742; C15042; C19433; C19479	C12H10N2O	0.32467	0.0528774	-0.657759	0.00463771	0.0102264	0.990066	-0.0882936	0.338367	0.1298	0.297416	-0.273923	0.0493842	0.098277	0.762672	-
293	197.13	8375.07	0.0626941	Slaframine	C06185	C10H18N2O2	-0.0263003	0.987896	0.0756994	0.804478	-1.76702	0.00177209	-3.28375	0.00217878	0.0835018	0.377325	-0.658336	3.39789e-05	0.0188571	0.999213	-
294	198.089	8176.11	0.616785	gamma-Glutamyl-beta-aminopropiononitrile	C06114	C8H13N3O3	0.0186997	0.991193	0.118628	0.417643	-0.171181	0.382171	-0.647301	0.00245335	0.79802	0.00366207	0.532794	0.00298409	-0.0433696	0.999213	-
295	199.072	8113.02	0.50527	Dihydroclavaminic acid; Alanylclavam	C06659; C17360	C8H12N2O4	0.15918	0.617048	0.110114	0.622207	-0.0700293	0.89585	-1.2348	0.00138723	0.165779	0.293351	0.211365	0.0251709	0.675256	0.018743	-
296	199.17	8056.52	0.565215	Dodecanoic acid	C02679	C12H24O2	0.0649465	0.721535	-0.0617077	0.485651	-0.0195084	0.951998	-0.150717	0.107086	0.0337834	0.858699	-0.0753711	0.352102	0.0137779	0.999213	-
297	199.969	7957.25	-0.351506	S-Sulfo-L-cysteine	C05824	C3H7NO5S2	-0.0317543	0.987896	0.0593458	0.825368	0.0433175	0.957994	-0.0965526	0.498119	1.09711	0.000619039	-1.23791	0.000232084	0.129658	0.999213	-
298	200.986	7754.24	0.378273	4-Sulfobenzoate	C02236	C7H6O5S	0.0509569	0.987896	-0.239893	0.107778	0.0553929	0.92123	0.131302	0.278335	-0.0697577	0.741908	0.00725882	0.962744	0.0265861	0.999213	-
299	201.005	2.5052e+06	-0.649949	(1E,3E)-4-Hydroxybuta-1,3-diene-1,2,4-tricarboxylate; (1E)-4-Oxobut-1-ene-1...	C04324; C04434; C05364	C7H6O7	-0.0322414	0.987896	-0.137983	0.447209	-0.0193857	0.972297	-0.206359	0.19535	-0.0500502	0.874735	0.128226	0.0926307	0.018577	0.999213	-
300	201.019	164164	0.479808	Bergaptol; Xanthotoxol; Isobergaptol; 6-Hydroxyangelicin	C00758; C00841; C18084; C18085	C11H6O4	0.134685	0.448063	0.0478228	0.754928	0.281766	0.118083	0.5567	0.0129764	1.17965	0.0008828	0.644218	0.000160794	0.1156	0.744401	-
301	201.068	63679.9	0.336494	alpha,beta-Didehydrotryptophan; Vasicinone	C06732; C10744	C11H10N2O2	0.0924485	0.518701	-0.0267713	0.927617	-0.186565	0.024692	0.0812396	0.139163	-0.0374068	0.885529	-0.0244719	0.932244	-0.0293097	0.999213	-
302	201.088	19798.5	0.0105196	Proclavaminic acid; Coprine	C06658; C08271	C8H14N2O4	0.0432896	0.986291	0.117213	0.568058	-0.817864	0.00240031	-0.137748	0.226085	-0.383516	0.0299154	-0.50448	2.83192e-05	-0.0386674	0.999213	-
303	201.101	13668.5	0.142309	Dinotefuran	C18509	C7H14N4O3	0.0432618	0.987896	0.0851867	0.622207	-0.61066	0.00522524	-0.0739806	0.392967	-0.0562222	0.747723	-0.18628	0.0740303	-0.0658857	0.999213	-
304	201.113	13503.1	0.372702	Sebacic acid; Diethyl adipate; Dimethyl suberate	C08277; C14566; C17803	C10H18O4	0.0300146	0.987896	0.0841634	0.613223	-0.380987	0.0809835	0.111	0.358096	0.00474079	0.981783	-0.0533092	0.539883	0.0589143	0.999213	-
305	202.051	6267.33	0.69768	Indolepyruvate; Anibine	C00331; C10127	C11H9NO3	0.0672197	0.987896	0.0773658	0.412186	0.186947	0.00169733	0.510573	0.000195843	-0.0121497	0.958212	0.0253794	0.86124	0.024615	0.999213	-
306	202.072	16339.7	0.11148	N2-Acetyl-L-aminoadipate	C12986	C8H13NO5	0.066662	0.842758	0.142906	0.485651	-0.16594	0.582426	-0.0136034	0.895659	0.700807	0.00176925	0.359138	0.000352554	0.0870232	0.999213	-
307	203.02	8071.72	0.724185	Oxaloglutarate	C05533	C7H8O7	0.00895209	0.994449	0.10867	0.314058	-0.36263	0.00556022	0.139173	0.0998156	-0.126327	0.478047	0.0754428	0.529596	-0.0295218	0.999213	-
308	203.057	4979.38	0.300708	3-O-Ethyl-L-ascorbic acid	C18342	C8H12O6	0.0246451	0.987896	0.10899	0.583612	-0.424182	0.017013	-0.162701	0.103832	0.199157	0.0605921	0.204908	0.0112268	0.0417999	0.999213	-
309	203.082	1.64326e+06	0.686599	L-Tryptophan; D-Tryptophan; Tryptophan; Ethotoin; Idazoxan; Nirvanol	C00078; C00525; C00806; C07839; C10968; C14916	C11H12N2O2	0.0193974	0.991193	0.0560969	0.657252	-0.0433752	0.89585	-0.260103	0.00224942	-0.103855	0.632729	-0.500815	0.000635544	-0.0356787	0.999213	-
310	203.103	102961	-0.0987213	N6-Acetyl-N6-hydroxy-L-lysine; N5-(L-1-Carboxyethyl)-L-ornithine	C03955; C04210	C8H16N2O4	0.0137172	0.987896	0.135639	0.622207	-2.44927	0.00119043	-0.33136	0.0529431	-1.26788	0.00166792	-1.13332	2.22163e-05	-0.0675326	0.999213	-
311	204.053	30032.3	0.611645	Lipoamide	C00248	C8H15NOS2	0.154059	0.532783	0.140891	0.32614	-0.00752709	0.990596	0.551138	0.00170292	0.222618	0.0646021	0.273756	0.0124845	0.0797555	0.999213	-
312	204.067	6751.06	0.658701	Indolelactate; 5-Methoxyindoleacetate; Gentianamine; Swietenidin B	C02043; C05660; C09961; C10741	C11H11NO3	0.0681258	0.895284	0.61602	0.00978777	-0.0675396	0.906947	2.06331	7.16819e-05	0.0748478	0.66649	0.104596	0.435552	0.276138	0.39643	-
313	204.107	4458.5	0.0109436	Tetrahomomethionine	C17225	C9H19NO2S	0.0510308	0.987454	0.0949173	0.71702	-2.00325	0.00112423	-0.258963	0.121657	-0.928868	0.00664648	-0.910724	2.93631e-05	0.0503408	0.999213	-
314	204.124	5443.15	-0.30853	Pantothenol	C05944	C9H19NO4	0.0736759	0.775311	0.0152345	0.954952	-0.738803	0.0179947	-0.102004	0.229933	0.0327972	0.85806	0.0482381	0.604773	0.0634524	0.999213	-
315	204.998	18708	0.655193	3-Oxalomalate	C01990	C6H6O8	0.178064	0.113896	0.154971	0.314207	-0.041207	0.876325	-0.366626	0.00354737	-0.335716	0.000799826	-0.276825	0.00177659	-0.0576974	0.999213	-
316	205.035	15522.7	0.448056	(R)-2-Hydroxybutane-1,2,4-tricarboxylate; 2-Methylcitrate; (2S,3R)-3-Hydrox...	C00725; C01251; C02225; C04593; C05662; C16241	C7H10O7; C8H14O2S2	-0.301754	0.113896	0.076867	0.698025	-0.0106428	0.987652	0.000298013	0.996826	1.15781	0.00322354	-0.159832	0.0171003	-0.336876	0.0242011	-
317	205.098	3468.05	0.44607	Phenylethylmalonamide; Pheneturide	C07499; C12590	C11H14N2O2	0.0726992	0.904672	0.0881304	0.531078	-0.646328	0.000460302	-0.165458	0.0722235	-0.159518	0.217236	-0.0846066	0.640582	-0.0273261	0.999213	-
318	205.16	4901.02	0.655968	alpha-Irone; (+)-trans-alpha-Irone; 4-Octylphenol; 4-tert-Octylphenol	C09690; C11350; C14132; C14205	C14H22O	0.0568061	0.965625	-0.0280681	0.860092	-0.0345035	0.933007	-0.0346002	0.729192	-0.0671409	0.643781	0.0337471	0.780297	0.00345263	0.999213	-
319	206.002	3153.6	-0.849128	Quinoclamin	C18584	C10H6ClNO2	-0.0882737	0.986291	0.1546	0.591471	0.144139	0.72641	-0.0341588	0.804635	0.386061	0.0777469	0.26783	0.289436	0.0652017	0.999213	-
320	206.039	3796.24	0.551366	Benzthiazuron	C19058	C9H9N3OS	-0.0447692	0.987896	0.122315	0.202079	0.0963979	0.733593	-0.0924524	0.375668	0.177143	0.400261	-0.109298	0.285234	-0.0418452	0.999213	-
321	206.082	19204.8	0.44875	N-Acetyl-L-phenylalanine; N-Acetyl-D-phenylalanine; Cantleyine; Rhexifoline...	C03519; C05620; C09933; C09986; C20126	C11H13NO3	0.0842591	0.904672	0.019419	0.93316	-1.08434	0.000934094	-0.209007	0.183832	1.51621	0.000681716	1.07965	2.42161e-06	-0.00547661	0.999213	-
322	206.094	1939.86	0.455654	5-(alpha-Phenylethyl)semioxamazide; 4-(N-Nitrosomethylamino)-1-(3-pyridyl)-...	C15418; C16453	C10H13N3O2	0.148186	0.775311	0.0308796	0.884602	-0.377597	0.00155604	-0.082823	0.23947	0.617238	0.00876631	0.246104	0.0814345	0.0138473	0.999213	-
323	206.13	4005.83	0.013054	Arenaine; Alchornine	C09912; C10567	C11H17N3O	0.0164468	0.987896	0.122228	0.665403	-0.916076	0.000196899	-0.340938	0.0191125	-0.0501837	0.71745	-0.648741	6.14161e-05	-0.163895	0.954337	-
324	207.08	40354.4	NA	Chalcone; 1-Methoxyphenanthrene; Chalcone	C01484; C11433; C15589	C15H12O	0.121356	0.774257	0.015695	0.875278	-0.0111948	0.951998	-0.237463	0.00566534	-0.11722	0.455406	0.174352	0.206083	-0.049293	0.999213	-
325	207.114	16541.3	0.55081	Pilocarpine; Aminocarb; 4-Dimethylamino-L-phenylalanine	C07474; C11071; C18619	C11H16N2O2	0.264187	0.25736	-0.0396861	0.849905	-0.391424	0.00125478	-0.241135	0.0531859	-0.157248	0.2759	-0.0412067	0.892383	0.0522147	0.999213	-
326	207.139	3.91227e+06	-0.194542	4-Heptyloxyphenol	C14236	C13H20O2	0.162796	0.63106	0.0961104	0.0328467	-0.111014	0.188456	-0.122812	0.151634	0.158281	0.666427	-0.0185798	0.916948	0.0525674	0.999213	-
327	208.074	231650	0.472209	4-Acetamido-2-amino-6-nitrotoluene	C16420	C9H11N3O3	0.136425	0.787754	0.109184	0.447209	-0.111396	0.0912848	-0.211087	0.0290138	-0.236223	0.174094	-0.183277	0.175119	0.0798017	0.999213	-
328	208.109	83104.4	0.494279	4-(Methylnitrosamino)-1-(3-pyridyl)-1-butanol	C19574	C10H15N3O2	0.13356	0.847033	0.0424361	0.767325	-0.113457	0.400715	-0.159797	0.239119	-0.0657857	0.813831	-0.0532353	0.737599	-0.0133656	0.999213	-
329	209.031	21386.1	0.509161	D-Glucarate; D-Galactarate	C00818; C00879	C6H10O8	0.417701	0.0858154	0.155453	0.480938	0.0450265	0.931569	0.0795854	0.196131	0.404663	0.0196326	-1.51992	0.000344345	0.225655	0.521867	-
330	209.048	10548.3	0.238434	5-Hydroxyferulic acid methyl ester	C05619	C10H10O5	-0.197098	0.827196	0.104238	0.678825	-0.0352636	0.931569	-0.101933	0.434579	0.0239152	0.962075	0.0459955	0.939842	-0.168258	0.999213	-
331	209.067	4220.81	0.275974	Sedoheptulose; alpha-D-Mannoheptulopyranose; beta-D-Sedoheptulopyranose; Co...	C02076; C08236; C08355; C19612	C7H14O7	0.241438	0.0528774	0.146048	0.612058	-0.0548963	0.933007	-0.109277	0.454727	0.247305	0.130835	0.125592	0.130694	0.372656	0.046707	x
332	209.081	34935.8	NA	Phosphoagmatine	C02726	C5H15N4O3P	-0.0173396	0.987896	0.104182	0.572405	0.0763394	0.92123	-0.0338083	0.825889	0.285851	0.0250994	0.172084	0.0602459	0.0360467	0.999213	-
333	209.093	195473	0.530297	Aprobarbital; 2,6-Dihydroxypseudooxynicotine	C07826; C15986	C10H14N2O3	0.174229	0.717216	0.0250116	0.849269	-0.117933	0.106336	-0.159351	0.0124382	-0.0424212	0.86802	-0.059317	0.765755	-0.0681545	0.999213	-
334	210.043	10276	NA	DIMBOA; 5-(2'-Formylethyl)-4,6-dihydroxypicolinate; Betalamic acid	C04720; C05654; C08538	C9H9NO5	0.263626	0.239321	0.101309	0.412186	0.00987573	0.990066	0.113462	0.155957	0.711452	0.00784439	0.332488	0.00847689	0.0767892	0.999213	-
335	210.053	7182.29	0.0479084	Nicorandil	C13280	C8H9N3O4	0.0929508	0.448063	0.11559	0.502151	-0.127775	0.290908	0.0248363	0.698819	0.12763	0.354875	0.143899	0.131719	0.0853755	0.839692	-
336	210.076	21505.3	0.354474	Methyldopa anhydrous; Enicoflavine; 3-Hydroxy-5-methyl-L-tyrosine	C07194; C09946; C20801	C10H13NO4	0.0994218	0.904672	0.0555849	0.73643	-0.0581683	0.844062	-0.237088	0.0172275	-0.798171	0.0008828	-0.724519	9.98901e-05	0.00872436	0.999213	-
337	210.088	4451.06	0.607315	Zalcitabine	C07207	C9H13N3O3	0.143496	0.775311	0.105632	0.357486	-0.0175868	0.94594	-0.0713789	0.126078	-0.0115152	0.957817	-0.123414	0.272975	-0.20502	0.999213	-
338	210.126	7286	0.480405	Isouron	C18432	C10H17N3O2	0.261911	0.607269	0.0173905	0.917711	-0.0144245	0.89585	-0.116083	0.0949898	0.640393	0.666427	0.066454	0.774864	0.0446547	0.999213	-
339	211.002	11746.8	0.78491	2-Phosphinomethylmalate	C17947	C5H9O7P	0.106209	0.904672	-0.180865	0.235709	-0.261794	0.0811724	-0.305228	0.0228564	0.135918	0.543291	0.192132	0.048828	0.503862	0.018743	-
340	211.061	30692.7	0.694681	Danielone; n-Propyl gallate	C10674; C11155	C10H12O5	0.105074	0.747047	0.0157162	0.919434	-0.0430468	0.82039	-0.169499	0.0268107	-0.175794	0.166494	-0.0666106	0.493742	-0.00194255	0.999213	-
341	211.109	24134.3	0.627627	Butabarbital	C07827	C10H16N2O3	0.126047	0.640858	0.0472369	0.698025	-0.113743	0.545299	-0.0772098	0.315222	-0.0377403	0.886483	0.0494403	0.759647	-0.0653756	0.999213	-
342	211.134	322863	0.457995	Cucurbic acid; Putaminoxin; Traumatin; 12-Oxo-9(Z)-dodecenoic acid	C08482; C08509; C16309; C16311	C12H20O3	-0.0541244	0.904672	-0.0329161	0.860092	-0.0288713	0.941809	-0.354825	0.00177632	0.137391	0.538988	0.208068	0.0167854	0.144367	0.884963	-
343	211.145	9.40198e+06	0.797107	1,4'-Bipiperidine-1'-carboxylic acid	C16836	C11H20N2O2	0.0552958	0.987896	-0.0925634	0.678825	-0.431534	0.0174795	-0.393237	0.0141259	-0.0924074	0.584246	-0.0652482	0.470011	0.0371076	0.999213	-
344	211.997	516422	0.482322	4-Phospho-L-aspartate; 2-Amino-3-oxo-4-phosphonooxybutyrate	C03082; C07335	C4H8NO7P	0.137033	0.563499	0.132419	0.30153	0.188377	0.237193	0.0851186	0.428263	0.133736	0.330682	0.193053	0.0456372	0.346788	0.0242011	-
345	212.057	328305	0.4134	N,N-Dihydroxy-L-tyrosine	C15503	C9H11NO5	0.209293	0.507406	0.0822116	0.671661	0.081209	0.868931	0.0604714	0.552847	-0.00401756	0.985114	0.245763	0.0293401	0.189648	0.246888	-
346	212.141	87970.9	0.65019	Guanadrel	C07035	C10H19N3O2	0.105819	0.847033	0.0536354	0.814737	-0.273634	0.23347	-0.627792	0.00354737	-0.113882	0.504932	0.0773777	0.607665	0.00498107	0.999213	-
347	213.017	37017.6	-0.0279906	2-Deoxy-D-ribose 1-phosphate; 2-Deoxy-D-ribose 5-phosphate; 1-Deoxy-D-xylul...	C00672; C00673; C11437; C16637	C5H11O7P	0.672073	0.0995564	-1.73637	0.00459899	-1.02689	0.00924026	0.306858	0.16006	-0.421357	0.024294	-0.22378	0.137143	0.316384	0.716659	-
348	213.125	57300.6	0.122238	Dethiobiotin	C01909	C10H18N2O3	0.0422396	0.987896	0.082167	0.698025	-1.46489	0.000626231	-0.348869	0.0121081	-0.141453	0.255984	-0.918139	1.21923e-05	-0.0345577	0.999213	-
349	214.004	25290.7	0.429773	Cloxyfonac-sodium	C18819	C9H8ClO4.	-0.0420645	0.987896	0.203047	0.412186	0.102296	0.799456	0.0713227	0.523038	0.0392416	0.898231	0.0813043	0.296462	0.187801	0.795727	-
350	214.049	8137.33	0.602794	sn-Glycero-3-phosphoethanolamine	C01233	C5H14NO6P	-0.366007	0.0396532	-0.0227201	0.93316	-0.170382	0.625655	-0.268566	0.0877941	2.56786	0.000441466	0.374197	0.0294185	0.0635545	0.999213	-
351	214.109	3727.96	0.55224	2-Amino-9,10-epoxy-8-oxodecanoic acid	C12027	C10H17NO4	0.034929	0.987896	0.061849	0.76273	-0.194107	0.338107	-0.365517	0.0352731	-0.0870742	0.686038	-0.1903	0.194753	0.0144183	0.999213	x
352	214.128	2868.85	0.648321	Cycloate	C18780	C11H21NOS	-0.0321785	0.987896	0.0919319	0.71702	-1.31936	0.00076934	-0.296996	0.0314514	-0.150786	0.337343	-0.839472	0.000291723	-0.0386843	0.999213	-
353	215.033	18771	-0.0839278	2-C-Methyl-D-erythritol 4-phosphate	C11434	C5H13O7P	-0.14331	0.904672	0.0755039	0.875278	-0.496717	0.3318	-2.36174	0.00857337	-4.7343	0.00297646	-5.11707	0.00220577	0.0361085	0.999213	-
354	215.049	2156.95	0.0643441	6-Aminopenicillanate; Bisnorbiotin	C02954; C20384	C8H12N2O3S	-0.129322	0.914867	0.0629465	0.875278	-0.35253	0.447213	-1.46645	0.0091608	-3.2726	0.00235287	-3.73023	0.00152399	0.0428824	0.999213	-
355	215.104	14393	0.0549981	gamma-Glutamyl-gamma-aminobutyraldehyde	C15700	C9H16N2O4	-0.0198144	0.987896	0.160381	0.480274	-0.920273	0.00177209	-0.206627	0.153668	-0.37086	0.0159068	-1.02918	9.81714e-07	-0.0546921	0.999213	-
356	216.051	84944.8	0.471479	2-(Hydroxymethyl)-3-(acetamidomethylene)succinate	C04690	C8H11NO6	0.156118	0.0951243	0.0999777	0.681375	0.170972	0.704301	0.576895	0.00625744	-0.273778	0.0788471	0.0990284	0.276068	0.0227424	0.999213	-
357	216.099	12855.1	0.470749	N-Acetyl-L-citrulline	C15532	C8H15N3O4	0.360912	0.0188828	0.0961275	0.730824	-0.492447	0.153699	-0.140115	0.418871	0.0505122	0.853618	-0.0298511	0.809598	0.123341	0.716659	-
358	216.103	17203.5	0.071292	Glutethimide; Securinine; Pyracarbolid	C07489; C10614; C18914	C13H15NO2	0.144863	0.359097	0.105529	0.789322	-0.755905	0.017013	-0.161847	0.561767	-0.201612	0.099072	-0.411402	0.00180761	0.0199053	0.999213	-
359	216.136	64392.2	0.798546	beta-Alanyl-L-lysine; gamma-L-Glutamylputrescine	C05341; C15699	C9H19N3O3	0.0522811	0.994449	0.0403551	0.835974	-1.07611	0.000626231	-0.536365	0.000845527	1.25771	0.0320825	-0.607811	0.388981	0.390172	0.999213	-
360	217.051	550617	0.13256	2-Hydroxy-6-oxo-6-phenylhexa-2,4-dienoate; 4-Methylumbelliferyl acetate; 2,...	C01273; C03837; C07733; C10300; C16811; C20857	C12H10O4	-0.0768059	0.987896	0.173083	0.710455	0.289628	0.655348	0.738614	0.013727	-0.176745	0.35462	-0.325568	0.205615	0.206468	0.999213	-
361	217.066	569752	-0.688311	1-Hydroxypyrene; Pyrene-4,5-oxide; Pyrene-1,2-oxide; 2-Hydroxypyrene	C14519; C18254; C18267; C18268	C16H10O	0.0383606	0.927816	-0.0390534	0.682382	-0.141206	0.0142841	0.137002	0.0413988	-0.248137	0.00997805	-0.285001	0.0166154	0.0444002	0.999213	-
362	217.083	7209.8	0.410251	gamma-L-Glutamyl-D-alanine	C03738	C8H14N2O5	0.124882	0.492155	0.115191	0.653955	-1.65193	0.000912564	-0.201957	0.127082	-0.299405	0.123816	-0.486953	0.002919	-0.0182533	0.999213	-
363	217.119	2380.75	-0.147933	D-Lysopine	C04020	C9H18N2O4	0.0114713	0.987896	0.139475	0.605922	-2.65316	0.00134064	-0.251142	0.118726	-0.978475	0.00269055	-1.64074	1.85192e-05	-0.0482925	0.999213	x
364	217.136	2738.26	0.545426	N,N-Dimethyl-5-methoxytryptamine	C08309	C13H18N2O	-0.0147816	0.987896	0.114164	0.660057	-1.93481	0.000861503	-0.30351	0.0300469	-0.895067	0.00336133	-1.52349	4.28745e-05	-0.0340921	0.999213	-
365	218.033	6904.93	0.164777	4-Amino-2-methyl-5-phosphomethylpyrimidine	C04556	C6H10N3O4P	-0.016429	0.987896	0.00588568	0.987298	-0.326382	0.3318	-1.19585	0.00773359	-0.869047	0.000482191	-0.889935	0.00112574	0.0452106	0.999213	-
366	218.067	200843	0.650573	O-Succinyl-L-homoserine; N-Acetyl-D-mannosaminolactone	C01118; C03776	C8H13NO6	0.00432144	0.994449	0.101194	0.68126	-0.0562169	0.931569	-0.0730623	0.547112	0.160368	0.31762	0.132068	0.217168	0.00116537	0.999213	-
367	218.08	6.52682e+06	NA	1D-1-Guanidino-1-deoxy-3-dehydro-scyllo-inositol	C04673	C7H13N3O5	-0.027388	0.987896	0.100539	0.660057	-0.888606	0.00221923	-0.222849	0.120816	0.162292	0.31762	0.150239	0.143657	-0.0129932	0.999213	-
368	218.104	356615	-0.16218	Pantothenate	C00864	C9H17NO5	-0.00740642	0.994449	0.12695	0.622207	-0.0672011	0.92123	0.0136409	0.915209	0.183042	0.19322	0.11024	0.205615	0.0138203	0.999213	x
369	219.063	292645	0.487315	Carbamorph	C18923	C8H16N2OS2	-0.0219098	0.987896	0.0622949	0.76273	-1.15279	0.00145417	-0.00279208	0.971402	0.0741305	0.68038	-0.0256579	0.837935	-0.0986353	0.944785	-
370	219.099	91059.3	0.536748	N-Acetyl-beta-D-glucosaminylamine	C01239	C8H16N2O5	-0.062827	0.987896	0.151343	0.531078	-1.55995	0.00141732	-0.117063	0.40432	0.0219551	0.94369	0.119583	0.403643	-0.0931424	0.999213	-
371	219.15	23343.9	-0.0667335	Prilocaine	C07531	C13H20N2O	-0.0110691	0.994449	-0.0162491	0.936899	-0.937064	0.00150297	-0.210792	0.0121305	0.138553	0.350089	-0.137122	0.750255	-0.0342916	0.999213	-
372	220.048	73916.9	0.544634	L-Histidinol phosphate	C01100	C6H12N3O4P	0.0568912	0.986291	-0.10186	0.37373	0.0968659	0.299955	0.068918	0.214098	-0.0252614	0.886483	-0.0257237	0.792475	0.0743575	0.999213	-
373	220.082	51144	0.0329504	N-Acetyl-D-glucosamine; N-Acetyl-D-mannosamine; N-Acetyl-D-galactosamine; N...	C00140; C00645; C01132; C02711; C03136; C03878; C05021; C20328	C8H15NO6	-0.00380073	0.994449	0.12178	0.480938	-0.145663	0.536912	-0.140182	0.113877	0.155067	0.417969	0.0736666	0.441057	-0.00489755	0.999213	-
374	220.109	58049	-0.233971	Formetanate	C18668	C11H15N3O2	-0.00704744	0.994449	-0.00594911	0.979875	-0.285258	0.0530497	-0.0127784	0.879432	0.187663	0.181438	0.131345	0.192536	0.00716394	0.999213	-
375	221.049	35989.4	0.0748769	2-(3'-Methylthio)propylmalic acid; 3-(3'-Methylthio)propylmalic acid	C17214; C17215	C8H14O5S	-0.0145068	0.987896	-0.393557	0.00623987	-0.00918749	0.97548	-0.155557	0.0151039	-0.0553496	0.852494	-0.0644358	0.585458	0.00769112	0.999213	-
376	221.062	10989.6	NA	Isoflavone; Phenindione; Flavone; Tectoquinone; 9-Anthroic acid; Flavone; P...	C00799; C07584; C10043; C10405; C13699; C15608; C18253	C15H10O2	-0.129713	0.56227	-0.173096	0.253777	0.0563664	0.869339	-0.111175	0.156937	-0.111119	0.482617	-0.0629759	0.620505	0.0508181	0.999213	-
377	221.066	4042.19	0.59995	6-Acetyl-D-glucose	C02655	C8H14O7	-0.0177596	0.987896	-0.347165	0.0111752	-0.069143	0.788523	-0.0972008	0.209357	-0.011923	0.951994	-0.0708251	0.450086	0.0108882	0.999213	-
378	221.093	4781.67	0.0537522	N5-Phenyl-L-glutamine	C20843	C11H14N2O3	0.00891086	0.991193	0.127576	0.561231	-0.844364	0.00395727	-0.306661	0.0607361	-1.10102	3.06206e-05	-1.07108	2.24119e-06	-0.0538917	0.999213	-
379	221.129	59076.5	0.47212	Miotine; 3-Hydroxymonoethylglycinexylidide; Mexacarbate	C11763; C16572; C18952	C12H18N2O2	0.032213	0.987896	0.0425367	0.767325	-0.056087	0.558531	-0.209744	0.00354737	0.0302142	0.86222	0.00262084	0.997525	-0.102358	0.716659	-
380	221.155	3619.82	0.49181	Rishitin; Isokobusone; Kobusone	C09715; C16977; C16983	C14H22O2	0.047541	0.959728	-0.0351481	0.86017	-0.0447811	0.899491	0.00461264	0.947002	-0.107978	0.519707	0.0761453	0.669595	0.0464227	0.999213	-
381	222.077	2338.2	0.218751	Bendiocarb; Dioxacarb	C14433; C18953	C11H13NO4	0.0636801	0.927816	0.0420183	0.810939	-0.524823	0.00395727	-0.122283	0.19606	0.151839	0.168695	0.280103	0.000574202	0.117176	0.716659	-
382	223.04	68360.2	-0.15158	Hydroxyanthraquinone	C02980	C14H8O3	-0.0506008	0.987896	-1.42749	0.0248734	0.479219	0.251538	1.39715	0.00215445	0.0884982	0.731784	-0.284139	0.0382617	-0.0349979	0.999213	-
383	223.06	126557	0.53788	Sinapate; 2-Benzylmalic acid; 3-Benzylmalic acid	C00482; C20653; C20654	C11H12O5	0.0308771	0.987896	-0.149913	0.172478	0.0860482	0.7248	0.705755	0.00493694	-0.1101	0.523368	-0.0139499	0.947361	-0.000750739	0.999213	-
384	223.073	262885	0.612787	3-Hydroxykynurenine; 3-Hydroxy-L-kynurenine; 5-Hydroxykynurenine; Stavudine	C02794; C03227; C05651; C07312	C10H12N2O4	0.146603	0.448063	-0.0208993	0.894146	-0.0237892	0.844062	0.846253	0.185958	0.0163083	0.951994	0.0665436	0.493912	0.065501	0.999213	-
385	223.097	31798.9	-0.0792507	Aspidinol; 2,4-Dihydroxy-6-pentylbenzoate	C10673; C20417	C12H16O4	0.100638	0.877064	-1.15859	0.00673304	0.264217	0.479633	-2.04456	0.00163956	0.224195	0.100474	-0.685555	0.00897024	0.0670879	0.999213	-
386	223.133	51961.1	0.153726	(6S,9R)-Vomifoliol; (+/-)-6-Hydroxy-3-oxo-alpha-ionol; Methyl jasmonate; (+...	C01760; C04166; C11512; C16318	C13H20O3	-0.00430124	0.994449	0.0517954	0.77431	-0.181002	0.120789	0.00472045	0.956684	0.0780965	0.740385	-0.000666772	0.99996	0.0120014	0.999213	-
387	224.057	8835.37	0.10897	4-Amino-4-deoxychorismate; 2-Amino-2-deoxyisochorismate	C11355; C18054	C10H11NO5	0.0609494	0.789956	0.0293339	0.875278	-0.122914	0.72641	-0.149108	0.21521	-0.0286532	0.851873	0.0947307	0.0697069	0.00988234	0.999213	-
388	224.068	5758.7	0.0341823	Ancitabin hydrochloride	C13112	C9H11N3O4.	0.0229556	0.987896	0.124772	0.210891	-0.0910909	0.749994	-0.150819	0.0651019	0.0911123	0.465336	0.0666201	0.233286	-0.00928051	0.999213	-
389	224.104	3175.13	0.713874	1-(Methylnitrosoamino)-4-(3-pyridinyl)-1,4-butanediol; alpha-[3-[(Hydroxyme...	C19577; C19580; C19603	C10H15N3O3	0.0208905	0.987896	0.0660799	0.678825	-0.17034	0.0452152	-0.0765406	0.0847749	1.18937	0.00132136	0.357185	0.0616536	-0.00081585	0.999213	-
390	225.088	7523.11	0.446357	Porphobilinogen; Carbidopa-levodopa	C00931; C06870	C10H14N2O4; C10H14N2O4.	0.0836937	0.845501	0.0970082	0.613223	-0.0364512	0.951998	-0.237537	0.0551851	0.0526405	0.858339	0.226092	0.0233383	0.555988	0.0618802	-
391	225.1	5099.82	0.185758	Carnosine	C00386	C9H14N4O3	0.0863786	0.825916	0.154953	0.486728	-0.631453	0.00709811	-0.314429	0.033616	-0.0134942	0.957817	-0.151354	0.0697069	0.177561	0.71499	-
392	225.124	2082.48	0.745591	Pentobarbital; Amobarbital	C07422; C07536	C11H18N2O3	0.241944	0.728256	-0.0162614	0.841085	-0.0312732	0.816085	-0.164818	0.0278934	-0.120417	0.747723	-0.00263838	0.997021	0.0358342	0.999213	-
393	225.161	11271.9	0.599279	1,8-Diazacyclotetradecane-2,9-dione; Cyclo(L-leucyl-L-leucyl)	C04277; C20514	C12H22N2O2	-0.0223588	0.98952	-0.0610338	0.698025	-0.30441	0.00529933	-0.361436	0.0118411	-0.159135	0.345901	-0.0812407	0.485707	0.051971	0.999213	-
394	225.186	16657.5	0.738459	Myristoleic acid	C08322	C14H26O2	0.256113	0.0951243	-0.188261	0.0782488	-0.00311493	0.995251	-0.642928	0.00159807	0.160676	0.495007	0.310137	0.0832827	0.0201472	0.999213	-
395	225.992	77181.9	-0.101976	3-Amino-4,7-dihydroxy-8-chlorocoumarin	C12469	C9H6ClNO4	0.101993	0.789956	0.0359255	0.730824	0.174296	0.0811724	0.0504247	0.535494	0.0735107	0.495192	-0.0872893	0.310778	0.0650835	0.999213	-
396	226.011	575125	0.345471	Trinitrotoluene	C16391	C7H5N3O6	0.0640964	0.927816	0.113808	0.602529	0.14763	0.584121	0.736501	0.00736436	0.155175	0.409819	-0.176891	0.0151967	0.00279819	0.999213	-
397	226.085	39803.5	NA	Deoxycytidine	C00881	C9H13N3O4	-0.128607	0.448063	0.119206	0.412186	-0.040738	0.938197	-0.106364	0.270008	0.188094	0.173271	-0.0478211	0.585113	-0.305347	0.362923	x
398	226.992	38196.9	NA	3,5-Dinitrosalicylic acid	C11319	C7H4N2O7	0.0158955	0.990627	-0.0100956	0.960693	-0.0363593	0.899548	0.0814806	0.462382	0.0446931	0.747723	-0.00497315	0.965496	-0.0140095	0.999213	-
399	227.035	12096.2	0.493059	Euxanthone	C10061	C13H8O4	-0.0269922	0.987896	-0.00147583	0.997576	-0.140457	0.674266	-0.451684	0.00123031	-0.0252779	0.864855	-0.198988	0.163965	-0.0498002	0.999213	x
400	227.068	2034.48	0.667413	Deoxyuridine	C00526	C9H12N2O5	0.36834	0.0347899	0.0805862	0.703678	-0.141558	0.61684	-0.450073	0.00958093	0.037564	0.86929	0.118955	0.165471	0.0977741	0.981279	x
401	227.104	1237.66	0.0340213	(S)-ATPA	C13733	C10H16N2O4	-0.0226422	0.987896	0.108606	0.711664	-0.845599	0.00635511	-2.53316	0.00166269	0.121117	0.495007	-0.151599	0.00194463	0.137171	0.870211	-
402	227.115	72353.9	-0.216986	Deoxyguanidinoproclavaminic acid	C06656	C9H16N4O3	-0.0165679	0.987896	0.122247	0.601665	-0.61887	0.0165128	-0.947397	0.00251165	0.272198	0.0250847	0.0487118	0.685613	0.0838248	0.999213	-
403	227.202	17735.6	0.705688	Tetradecanoic acid	C06424	C14H28O2	0.0741856	0.778162	-0.455511	0.000894302	-0.292574	0.0212872	-1.02275	0.000346879	-0.022883	0.908205	0.142939	0.145256	0.0675618	0.999213	-
404	228.051	2231.62	0.266795	4-(L-Alanin-3-yl)-2-hydroxy-cis,cis-muconate 6-semialdehyde; 5-(L-Alanin-3-...	C04796; C04797; C17758	C9H11NO6	0.233416	0.448063	0.0888842	0.613223	0.0104369	0.990596	0.0199347	0.894789	0.573255	0.00802918	0.703107	0.000552406	0.30779	0.130908	-
405	229.012	4094.17	0.741441	D-Ribose 5-phosphate; D-Ribulose 5-phosphate; D-Xylulose 5-phosphate; alpha...	C00117; C00199; C00231; C00620; C01101; C01112; C03291; C03736; C03737; C03906; C06238; C06239; C06441; C06814; C18655	C5H11O8P; C6H15O3PS2	0.207765	0.182893	0.134378	0.378095	0.546121	0.0560588	-0.00679637	0.927291	0.859022	0.00802537	0.607563	0.000280766	0.0668331	0.889265	-
406	229.063	2570.51	0.564755	Diethyl phenyl phosphate	C11732	C10H15O4P	0.0131149	0.987896	0.0598428	0.65648	-0.0268303	0.964336	-0.270432	0.0388889	0.0176014	0.901562	-0.0661123	0.63176	0.0103881	0.999213	-
407	231.032	6554.55	NA	5-Hydroxyxanthotoxin	C02951	C12H8O5	0.324777	0.0326089	-0.0385459	0.787403	0.444545	0.227633	-0.471471	0.0091608	-0.0791963	0.604787	-0.263148	0.0139134	0.237832	0.362923	-
408	231.078	65411.2	0.251033	Nalidixic acid; Phenobarbital; Oxabetrinil	C05079; C07434; C18878	C12H12N2O3	0.0323937	0.987896	0.154716	0.37499	-0.717668	0.00709811	-0.100044	0.509409	-0.0287844	0.795108	-0.143319	0.0297249	0.0925346	0.999213	-
409	231.099	35571.3	0.0993242	Boc-Asn; N2-Succinyl-L-ornithine; N6-Acetyl-LL-2,6-diaminoheptanedioate; 4-...	C01410; C03415; C04390; C15767	C9H16N2O5	-0.0120946	0.991193	0.169447	0.480938	-1.78795	0.00141732	-0.12946	0.417411	-0.0548061	0.734743	-0.249257	0.0266476	-0.0476679	0.999213	-
410	232.028	35491.8	0.537494	Sulbactam; Dopamine 3-O-sulfate; Dopamine 4-O-sulfate	C07770; C13690; C13691	C8H11NO5S	0.0824412	0.927816	0.132562	0.601665	0.111118	0.675659	0.463628	0.00402355	0.0133598	0.952605	0.105519	0.377387	0.00683189	0.999213	-
411	232.137	12796.5	0.648562	Hexahomomethionine	C17233	C11H23NO2S	-0.0330662	0.987896	0.105635	0.654239	-1.74575	0.00112423	-0.196648	0.122819	-0.754996	0.00132136	-1.25842	0.000246005	-0.0393287	0.999213	-
412	232.975	8109.58	-0.726944	Ferrous lactate	C17382	C6H10FeO6	0.146629	0.751845	0.837455	0.730554	0.395278	0.218405	-0.139839	0.813661	-0.16863	0.39621	-0.155777	0.112635	0.0870574	0.999213	-
413	233.027	3675.62	0.25412	2'-Hydroxybiphenyl-2-sulfinate	C06742	C12H10O3S	0.349514	0.031148	-0.00316931	0.986883	0.0309845	0.94594	0.0549463	0.500141	-0.334415	0.0426018	-0.274098	0.0474698	0.396318	0.0907085	-
414	233.061	4999.05	0.030726	4,5-Dihydroxypyrene; 1,6-Dihydroxypyrene; 1,8-Dihydroxypyrene; 1-Hydroxypyr...	C18250; C18263; C18264; C18265; C18266	C16H10O2	-0.0196267	0.987896	0.091409	0.568058	-0.192152	0.369381	-0.0304064	0.804689	0.145092	0.302594	0.179339	0.00453741	0.0274415	0.999213	-
415	233.155	8588.77	0.673092	Bakkenolide A; Confertifolin; Drimenin; Eremophilenolide; Helminthosporal; ...	C09350; C09376; C09399; C09409; C09677; C09686; C09712; C09721; C09739; C09743; C16942; C16949; C17090; C17489; C17491; C17492; C17504; C17609; C19678; C20309; C20404	C15H22O2	0.0324777	0.987896	0.0201021	0.893269	0.0599244	0.765201	0.00647372	0.937256	-0.0181589	0.909584	0.0183992	0.852361	0.025373	0.999213	-
416	234.059	15695.9	0.477321	Carboxin	C11255	C12H13NO2S	0.172772	0.751845	-0.0862077	0.697991	-0.0357406	0.931569	-0.211969	0.0836148	0.129702	0.526906	0.286172	0.0211301	0.00683781	0.999213	-
417	234.113	7880.79	0.489235	Lophophorine	C09573	C13H17NO3	0.137753	0.721535	-0.0937231	0.730554	-1.42067	0.0021689	-0.309143	0.0560137	1.0878	0.000207212	0.530134	0.00329797	0.0489328	0.999213	-
418	234.984	12522.2	0.514354	1,3-Benzenedisulfonamide	C14182	C6H8N2O4S2	0.062901	0.94183	0.167297	0.454493	0.373609	0.0902515	0.682669	0.00160449	-0.237337	0.289148	-0.0226954	0.816765	0.0429364	0.999213	-
419	235.02	24570	-0.0612199	Isosorbide dinitrate	C07456	C6H8N2O8	0.0391001	0.987896	0.0892821	0.613223	0.190022	0.117353	0.117335	0.224065	0.0504902	0.758088	0.0360959	0.466686	0.00620934	0.999213	-
420	235.028	5568.14	0.505069	2-Imino-3-(7-chloroindol-3-yl)propanoate	C19688	C11H9ClN2O2	0.10333	0.903576	0.0582288	0.692534	0.0821644	0.0432674	-0.00930204	0.894789	0.0682018	0.740385	0.0508675	0.674243	-0.00622299	0.999213	-
421	235.109	10071.6	0.630454	Carbetamide; Hexobarbitone	C11075; C11723	C12H16N2O3	0.0891109	0.904672	0.060495	0.732997	-1.83022	0.00103004	-0.390039	0.0293244	-0.216684	0.0638727	-0.093175	0.671951	-0.0678057	0.999213	-
422	235.144	4468.07	0.757001	Procaine; Procaine hydrochloride; Metabutethamine	C07375; C07894; C17723	C13H20N2O2; C13H20N2O2.	0.149229	0.17595	-0.0556472	0.732997	-0.581515	0.00924026	-0.303387	0.0212051	-0.358003	0.0325393	-0.962529	0.000504876	-0.243268	0.870211	-
423	236.079	10457.2	0.40774	Sepiapterin; 6-Pyruvoyltetrahydropterin; Biopterin	C00835; C03684; C06313	C9H11N5O3	0.106235	0.662673	0.0636683	0.727228	-0.0713336	0.904272	-0.107116	0.403333	-0.261985	0.0811541	-0.16918	0.0310943	0.0413815	0.999213	-
424	237.018	60695.2	0.649259	SQ 26180	C16842	C6H10N2O6S	0.0605412	0.96593	-0.0484154	0.746031	0.148454	0.00522498	0.173216	0.0538714	0.486916	0.00192871	0.336611	0.00785079	0.00657188	0.999213	-
425	237.063	25869	0.403314	Xanthopterin-B2	C02333	C9H10N4O4	0.20538	0.392344	0.0559705	0.665403	-0.062551	0.844062	-0.078497	0.412008	0.0339599	0.86802	0.112176	0.111044	-0.0448738	0.999213	x
426	237.088	2.88531e+06	0.495488	Felbamate	C07501	C11H14N2O4	0.0239454	0.987896	0.0911193	0.672679	-0.864051	0.000962979	-0.395118	0.0100079	-0.725966	0.000599931	-0.70208	4.1202e-05	0.0148088	0.999213	-
427	237.135	191872	0.401635	Pirimicarb	C11079	C11H18N4O2	0.189437	0.634019	0.0127151	0.967584	0.0290443	0.931569	0.0598306	0.629897	-0.104721	0.795186	0.00659195	0.970422	0.0217238	0.999213	-
428	238.05	61206.5	0.646448	Dianthalexin; Crinasiadine	C08477; C10583	C14H9NO3	0.0232286	0.987896	0.0107222	0.959908	0.0958881	0.54067	-0.146123	0.304024	-0.0151049	0.948263	0.149623	0.247761	0.0166271	0.999213	-
429	239.018	14415.2	0.18293	L-Cystine; Cystine	C00491; C01420	C6H12N2O4S2	-0.0893008	0.743256	-0.510374	0.00104112	-0.0527378	0.527403	-0.14987	0.0531859	-0.758103	0.000599931	-1.06595	9.81714e-07	-0.0417913	0.999213	-
430	239.035	10108.8	0.691148	Alizarin; Danthron; Anthrafravic acid	C01474; C10312; C14267	C14H8O4	-0.0247478	0.987896	-0.0340837	0.817588	0.147302	0.493296	0.088568	0.123511	-0.0976219	0.604195	0.013936	0.91061	-0.0122795	0.999213	-
431	239.115	8737.6	-0.246134	Homocarnosine; beta-Alanyl-N(pi)-methyl-L-histidine; N(alpha)-gamma-L-Gluta...	C00884; C01262; C04138	C10H16N4O3	0.0336498	0.986291	0.0719368	0.609864	-0.150287	0.110767	-0.151375	0.0427763	0.131688	0.266681	0.0596032	0.471035	0.0840047	0.944785	-
432	239.14	3139.91	0.568652	Pirbuterol	C07807	C12H20N2O3	0.136443	0.90444	0.020333	0.953259	-0.662727	0.00316732	-0.240562	0.199251	-0.142768	0.350908	-0.176903	0.438605	0.108175	0.999213	-
433	239.201	10867.4	0.179901	Cryptomeridiol	C17676	C15H28O2	0.116786	0.750874	-0.181326	0.0851159	-0.124089	0.416492	-0.479359	0.0146586	-0.0388886	0.86802	-0.000536617	1	0.106539	0.999213	-
434	240.099	1.12358e+06	0.638275	5-Methyl-2'-deoxycytidine	C03592	C10H15N3O4	-0.0441824	0.987896	-0.675676	0.0328467	0.0338693	0.97548	0.267937	0.52176	-0.162334	0.301522	-0.015016	0.923715	0.00672712	0.999213	-
435	241.042	21626.2	0.521872	4-Chlorochalcone	C14585	C15H11ClO	-0.274147	0.0376368	0.0333607	0.839779	-0.157537	0.252674	-0.253764	0.129756	-0.00280513	0.985114	-0.0679327	0.224728	0.00501831	0.999213	-
436	241.058	10530.4	0.556589	5-Phosphonooxy-L-lysine; 2-Deoxystreptamine phospahte; 2-Deoxystreptamine 4...	C03366; C03828; C03980; C16743	C6H15N2O6P	0.0298976	0.987896	0.0367969	0.762168	-0.0827676	0.546832	-0.179056	0.00315958	-0.0662395	0.684453	-0.00570122	0.972514	0.176731	0.205315	-
437	241.083	4734.71	0.306085	Thymidine; HC Yellow No. 4	C00214; C19431	C10H14N2O5	0.0744311	0.910414	0.0695072	0.677086	-0.208309	0.382171	-0.421024	0.00479502	-0.0762966	0.717093	-0.711522	1.07819e-05	0.0682571	0.999213	-
438	241.217	4321.56	0.602375	Pentadecanoic acid; 12-Methyltetradecanoic acid	C16537; C16665	C15H30O2	0.109223	0.533642	-0.341208	0.00225564	-0.203954	0.00395727	-0.553807	0.0039957	-0.0919654	0.56576	0.097358	0.253724	-0.0285706	0.999213	-
439	242.008	19317.7	0.548077	Ethoate-methyl	C18983	C6H14NO3PS2	0.038515	0.987896	-0.0417511	0.824549	0.132678	0.275473	0.0854472	0.191921	-0.0193555	0.951994	0.0497776	0.775846	0.0428417	0.999213	-
440	243.03	64775.6	0.801336	Gentisein; Mesuaxanthone B; 1,3,5-Trihydroxyxanthone	C10065; C10082; C10094	C13H8O5	-0.104525	0.775311	-0.1622	0.21085	-0.328286	0.024692	-0.426248	0.000184011	-0.416731	0.00939138	-0.360497	0.117016	-0.0512646	0.999213	-
441	243.042	255841	0.29134	Penicillenic acid	C11747	C9H12N2O4S	0.211432	0.842758	-0.777088	0.00285136	-0.474552	0.00590573	-0.0510227	0.68635	0.0509179	0.886483	-0.260122	0.293238	0.0348871	0.999213	-
442	243.062	204645	-0.370688	Uridine; Pseudouridine; Spongouridine	C00299; C02067; C16745	C9H12N2O6	0.0396684	0.904672	-1.65971	0.00186604	-0.988622	0.00155604	-0.237855	0.100278	-0.605691	0.00115416	-0.616422	0.000177365	0.233885	0.416331	x
443	243.081	5.8659e+06	0.230731	Biotin; C20818	C00120; C20818	C10H16N2O3S	-0.0339053	0.987896	-0.336401	0.0233496	-0.308796	0.111354	-0.289266	0.0110464	-0.0445674	0.803555	-0.0799233	0.230622	0.0239964	0.999213	-
444	243.172	350819	-0.407257	N-(6-Aminohexanoyl)-6-aminohexanoate; Leucyl-leucine	C01255; C11332	C12H24N2O3	-0.0986506	0.662673	0.015742	0.954952	-3.61689	0.00141732	-0.397069	0.0352731	-0.408386	0.0129149	-2.18176	0.000352554	-0.0928795	0.999213	-
445	244.083	200598	0.196283	Debromohymenialdisine	C19897	C11H11N5O2	0.102065	0.787754	0.000190569	0.99913	-0.22217	0.447621	-0.0586425	0.598035	0.299655	0.023024	0.138584	0.0675973	0.0973755	0.895435	-
446	245.044	52969.9	0.577729	Glycerophosphoglycerol	C03274	C6H15O8P	-0.221135	0.0984905	0.0819498	0.732828	0.121598	0.84564	0.525122	0.00893748	0.359373	0.039239	0.0683303	0.12801	0.0233457	0.999213	-
447	245.114	22281.5	0.063082	2,4-Bis(acetamido)-2,4,6-trideoxy-beta-L-altropyranose; 2,4-Diacetamido-2,4...	C19972; C20424	C10H18N2O5	-0.00454359	0.994449	0.166008	0.531078	-1.05631	0.00396045	-0.122645	0.435326	0.0916218	0.480117	0.111987	0.196757	0.0123147	0.999213	-
448	246.064	33712.5	NA	N-Succinyl-L-glutamate	C05931	C9H13NO7	0.497233	0.0215993	0.0798679	0.691285	-0.00173763	0.996123	0.509243	0.0219205	-0.362337	0.024294	-0.0588856	0.622533	0.108875	0.981279	-
449	247.075	10558.1	0.487342	1-Hydroxy-6-methoxypyrene; 1-Methoxypyrene-6,7-oxide; 7,8-Dihydropyrene-8-c...	C18261; C18262; C18273; C18274	C17H12O2	0.0216745	0.987896	0.154517	0.370974	-0.444647	0.0564364	0.22574	0.0720482	-0.0742306	0.78288	0.000963379	0.998425	0.0991332	0.989593	-
450	248.079	13697.5	0.652558	S-Acetyldihydrolipoamide	C01136	C10H19NO2S2	0.106721	0.787754	0.184238	0.389289	0.0640752	0.761694	0.0804872	0.484121	0.10071	0.721218	0.12948	0.256597	0.15796	0.893369	-
451	248.128	5026.16	0.432025	Ruspolinone; 1-(4-Methoxyphenyl)-3-(4-morpholinyl)-1-propanone	C10169; C15032	C14H19NO3	-0.0303652	0.987896	0.010822	0.967455	-0.574066	0.0174795	-0.239531	0.0863981	0.357361	0.109767	-0.0795525	0.602663	0.136946	0.716659	-
452	249.045	8564.82	0.585016	Sulfadiazine	C07658	C10H10N4O2S	0.00597599	0.994449	0.0309862	0.927617	-0.0895424	0.577519	0.235007	0.000915061	0.111206	0.638617	0.194989	0.0233383	0.0766598	0.981279	-
453	249.057	14424.6	NA	gamma-L-Glutamyl-L-cysteine	C00669	C8H14N2O5S	0.0990492	0.389715	0.158558	0.324617	0.0653471	0.797858	0.19891	0.0380022	0.172434	0.0785614	0.242113	0.00121109	0.151299	0.362923	-
454	249.068	4138.42	0.50474	4,4'-Methylenediphenyl diisocyanate	C19453	C15H10N2O2	0.156666	0.775311	-0.0483725	0.635614	-0.083754	0.579621	-0.0276612	0.793017	-0.156618	0.245022	0.0572588	0.606607	-0.0327036	0.999213	-
455	249.149	2940.4	0.220486	Gemfibrozil; Arbusculin A; Ipomeamarone; Piperdial; Warburganal; Xanthoxin;...	C07020; C09295; C09689; C09711; C09748; C13453; C13456; C14716; C20403; C20405	C15H22O3	0.0853547	0.924855	-0.0203038	0.92943	-0.13574	0.215134	-0.180797	0.0186037	-0.00622166	0.979639	0.0790602	0.206898	0.101617	0.999213	-
456	250.094	340674	0.545018	Deoxyadenosine; 5'-Deoxyadenosine; Cordycepin	C00559; C05198; C08431	C10H13N5O3	0.0917495	0.960224	0.174732	0.359668	0.32515	0.138505	0.0396967	0.675779	-0.221112	0.0742777	-0.167483	0.0634304	-0.119799	0.870211	-
457	250.109	4854.59	0.702959	Ac-Tyr-OEt	C01657	C13H17NO4	0.0181993	0.994449	0.471855	0.787403	0.328782	0.931569	0.366364	0.697058	0.173732	0.26408	-0.0290387	0.768699	0.0804256	0.999213	-
458	250.145	4937.38	0.788915	Furmecyclox	C18912	C14H21NO3	-0.00158107	0.994449	-0.0331409	0.814737	0.0813064	0.697253	-0.0150324	0.890204	-0.04611	0.813831	0.0674817	0.460713	0.0393848	0.999213	-
459	250.997	63597.4	NA	Pyrithione zinc	C13427	(C5H4NOS)2.	0.0106828	0.991193	0.139322	0.150691	0.153518	0.267003	0.252045	0.00754829	-0.00338214	0.987971	0.0960693	0.327095	0.0644838	0.999213	-
460	251.066	360604	NA	5-Hydroxy-N-formylkynurenine	C05648	C11H12N2O5	0.12916	0.425548	0.0580545	0.57803	-0.0748333	0.632537	-0.367768	0.00159807	-0.143572	0.310872	-0.142403	0.0721166	0.0821994	0.875565	-
461	251.079	4476.32	0.667026	Nebularine; Deoxyinosine; N-D-Ribosylpurine	C01736; C05512; C15586	C10H12N4O4	-0.241772	0.239071	0.0840482	0.677086	-0.0432705	0.938197	-0.029276	0.73593	-0.0351636	0.846456	0.0436269	0.528661	0.0297175	0.999213	x
462	251.104	8304.8	0.169244	3-Hydroxyhexobarbital	C03068	C12H16N2O4	-0.011657	0.994449	0.0960907	0.653955	-1.64564	0.00141732	-0.451913	0.0208927	-0.325453	0.0944957	-0.271485	0.00179004	0.000144239	0.99945	-
463	252.107	199643	0.248814	Fenothiocarb	C11084	C13H19NO2S	-0.030346	0.987896	0.0919965	0.500756	-1.102	0.00141732	-0.341703	0.00811691	-0.297441	0.189701	-0.189133	0.0128736	-0.0211075	0.999213	-
464	252.977	4707.79	0.503214	Magnesium L-ascorbic acid-2-phosphate	C18340	C6H7O9P.	0.00777766	0.994449	0.158577	0.451705	0.458563	0.191095	1.26739	0.00010506	0.0941957	0.623336	0.215295	0.0365787	-0.0934911	0.999213	-
465	253.05	22507.9	0.743184	5-L-Glutamyl-taurine; Hispidol; Chrysin; Primetin; Anhydroglycinol; Daidzei...	C05844; C08644; C10028; C10121; C10200; C10208; C10291; C10315; C10327; C10329; C10402; C12123; C14344	C15H10O4; C7H14N2O6S	-0.00189381	0.994449	0.0425226	0.805776	-0.0140861	0.972297	-0.0815359	0.267649	-0.073741	0.717093	0.136263	0.26884	-0.0138501	0.999213	-
466	253.083	7398.08	0.751723	2-Hydroxyfelbamate; p-Hydroxyfelbamate	C16582; C16584	C11H14N2O5	0.139836	0.524678	0.0684943	0.697991	-0.227931	0.363936	-0.510237	0.00210844	-0.0349887	0.886483	0.135887	0.218155	0.0435302	0.999213	x
467	253.095	8696.86	0.248903	Dyphylline	C07819	C10H14N4O4	0.0435177	0.987896	-0.296068	0.00856324	-0.125514	0.625655	-0.240388	0.022476	-0.0419696	0.864855	-0.0640434	0.308811	-0.000409999	0.999213	-
468	253.182	18466.9	0.627466	Kikkanol A; Kikkanol D; Kikkanol F; Chrysanthetriol; Prohydrojasmon	C17603; C17606; C17608; C17610; C18538	C15H26O3	0.0951884	0.987896	-0.142779	0.466597	0.0668855	0.903381	-0.417051	0.0013757	0.10304	0.704571	0.123507	0.222887	0.0696671	0.999213	-
469	253.217	8578.52	0.754014	(9Z)-Hexadecenoic acid	C08362	C16H30O2	0.0846214	0.959728	-0.19677	0.120772	0.246415	0.469447	-0.473244	0.0188765	-0.0269856	0.941388	0.103136	0.189238	0.0297746	0.999213	-
470	254.045	4649.27	0.694049	Imidacloprid	C11110	C9H10ClN5O2	0.00510439	0.994449	0.127688	0.217688	0.0509698	0.884313	0.0795246	0.535494	-0.0282886	0.908205	0.12711	0.1812	-0.009931	0.999213	-
471	254.119	17713.5	0.39697	6-(1,2,3,4-Tetrahydro-6-methoxy-2-naphthyl)-2(1H)-pyridone; 1-Methyl-6-(1,2...	C14900; C14901	C16H17NO2	0.0815077	0.904672	0.0991377	0.746091	-0.219496	0.408165	-0.241415	0.335951	0.006419	0.981783	0.13887	0.0285058	0.0683269	0.999213	-
472	254.151	20023.6	0.579213	L-Pyrrolysine	C16138	C12H21N3O3	0.118311	0.269319	0.0411608	0.875278	-0.0906366	0.899491	-1.73349	0.00147063	-0.130165	0.480117	0.105789	0.570564	-0.00401997	0.999213	-
473	255.032	3488	0.546676	Anthragallol; Purpurin	C10297; C10395	C14H8O5	-0.083068	0.563439	0.035466	0.849737	-0.0538028	0.899491	-0.333316	0.00233515	-0.0475257	0.833322	-0.0509064	0.188732	0.0409067	0.999213	x
474	255.075	8957.8	0.434025	Nicotinate D-ribonucleoside	C05841	C11H14NO6	0.0309616	0.987896	-0.0153859	0.92943	-0.174655	0.388847	-0.504204	0.00123031	0.200744	0.229351	0.0795199	0.329153	0.059118	0.999213	-
475	255.089	23398.5	0.672743	N-Acetoxy-IQ; Tolmetin sodium	C02328; C20290	C13H12N4O2; C15H14NO3.	0.00167625	0.994449	-0.0405388	0.809629	-0.1098	0.72641	-0.577043	0.00053343	0.216816	0.226529	0.163059	0.0820884	0.0596131	0.999213	-
476	256.058	11949	0.47438	Orbencarb; Thiobencarb	C11087; C14428	C12H16ClNOS	0.0118422	0.991193	0.216222	0.311538	0.0780319	0.931569	-1.17394	0.00897668	-0.0486949	0.844272	-0.0830986	0.17162	0.0237854	0.999213	-
477	256.993	4168.45	0.49604	Metobromuron	C18793	C9H11BrN2O2	0.0326424	0.987896	0.161781	0.045987	0.0428243	0.7858	0.011179	0.892605	-0.0942442	0.424715	0.0376762	0.760685	0.0220162	0.999213	-
478	257.078	6383.66	0.0801286	(1-Ribosylimidazole)-4-acetate; Spongothymidine	C05131; C16744	C10H14N2O6	0.0118064	0.987896	0.0428475	0.769139	0.00922864	0.990596	-1.34396	0.00053343	0.0620387	0.61222	0.0916308	0.0727384	0.257382	0.144829	-
479	257.091	17162.4	NA	Acadesine	C04663	C9H14N4O5	-0.00150913	0.994449	0.0217304	0.919434	0.072959	0.89585	-0.637977	0.00430996	0.0618427	0.760661	0.0752075	0.220057	0.307236	0.0921247	-
480	257.097	4075.24	0.636784	C20819	C20819	C11H18N2O3S	0.102976	0.46575	0.0589672	0.71702	0.0162159	0.975402	-0.838708	0.00053343	0.120882	0.51266	-0.0669762	0.320892	0.112779	0.70316	-
481	257.128	3777.34	0.426711	Cyclo[(Z)-alpha,beta-didehydrophenylalanyl-L-leucyl]	C20521	C15H18N2O2	0.000650511	0.999369	0.123361	0.247728	-0.0580889	0.89585	-0.22591	0.00582285	-0.165319	0.310872	-0.534578	0.00564204	0.0864405	0.999213	-
482	258.053	10049.8	0.462645	p-Nitrophenyl-O-ethyl ethylphosphonate	C13048	C10H14NO5P	0.0224773	0.987896	-0.00469925	0.97434	0.106499	0.61684	0.24813	0.00820049	-0.0153326	0.939694	0.346585	0.00102049	-0.0245556	0.999213	-
483	258.11	30925.7	0.761694	Linatine	C05939	C10H17N3O5	-0.0956741	0.965625	0.0748942	0.681375	-0.0886799	0.840465	0.120616	0.212676	-0.00279363	0.987971	-0.128975	0.310778	-0.0728308	0.999213	-
484	259.023	2434.19	0.810863	D-Fructose 6-phosphate; D-Glucose 6-phosphate; D-Glucose 1-phosphate; D-Man...	C00085; C00092; C00103; C00275; C00446; C00636; C00663; C00668; C01002; C01094; C01097; C01113; C01171; C01172; C01177; C02888; C02962; C02965; C03251; C03267; C03384; C03546; C03606; C03654; C03735; C03811; C04006; C05001; C05345; C06019; C06155; C06312; C15924; C15926; C18096; C18984	C6H13O9P; C7H17O4PS2	0.332305	0.113896	-1.37126	9.49484e-05	0.0867045	0.213081	0.256308	0.000195843	0.153403	0.261133	-0.409618	0.00161045	0.0191221	0.999213	-
485	259.076	5638.79	0.601869	Biotin sulfoxide	C20386	C10H16N2O4S	0.112292	0.695442	-0.037225	0.839779	-0.00345858	0.995251	-0.495045	0.000803061	0.169324	0.173463	-0.0366614	0.607665	0.28322	0.350898	-
486	259.108	21479.1	0.463243	Maculosin	C10605	C14H16N2O3	0.0737061	0.941181	-0.0149115	0.888164	-0.103913	0.304997	-0.185505	0.0201003	-0.0778739	0.749017	-0.113701	0.117881	-0.0118371	0.999213	-
487	259.146	4260.15	0.642082	Baptifoline; Cyclo(L-leucyl-L-phenylalanyl)	C10755; C20519	C15H20N2O2	0.0557259	0.94183	0.0716077	0.754928	-0.856014	0.00489361	-0.16945	0.254949	0.0729282	0.61222	0.0995961	0.351993	0.0233055	0.999213	-
488	260.057	12449.9	-0.0775267	Oxolinic acid	C11342	C13H11NO5	-0.00638069	0.994449	0.0508482	0.660057	0.128798	0.247601	0.483704	0.000605111	0.120897	0.310872	0.249279	0.00133493	-0.0798679	0.716659	-
489	260.076	3327	0.110898	Hymexazol O-glucoside; Hymexazol N-glucoside	C11102; C11104	C10H15NO7	0.428586	0.00457606	0.111876	0.665403	-0.202733	0.451458	0.0940618	0.448964	0.407385	0.00572252	0.335877	0.00493835	0.164165	0.663528	-
490	261.125	2640.09	0.271999	Methohexital; Physovenine	C07844; C09232	C14H18N2O3	-0.0217579	0.987896	0.0828941	0.692534	-1.02182	0.0021689	-0.261913	0.0790817	-0.114722	0.429226	-0.262913	0.00288112	-0.052627	0.999213	-
491	262.093	15310.4	0.617929	4-O-(beta-L-Arabinofuranosyl)-(2S,4S)-4-hydroxyproline	C20706	C10H17NO7	0.413362	0.129395	0.101897	0.66934	-0.202884	0.486898	-0.180565	0.191921	0.448308	0.0250994	0.129688	0.340511	0.327763	0.147299	-
492	263.038	4562.75	0.601735	(1R,2R)-3-[(1,2-Dihydro-2-hydroxy-1-naphthalenyl)thio]-2-oxopropanoic acid	C14799	C13H12O4S	0.0241623	0.987896	0.12864	0.0111752	-0.237004	0.000685966	-0.779758	0.000329814	-0.349371	0.00941223	-0.358849	0.000756207	-0.0139076	0.999213	-
493	263.083	6556.99	0.689381	Perlolyrine; 1-Phenylazo-2,6-dihydroxynaphthalene; 1-(4-Hydroxyphenylazo)-2...	C09231; C20280; C20281	C16H12N2O2	0.143909	0.46575	0.0405571	0.849905	-0.207349	0.391176	0.21952	0.0877941	-0.0767509	0.666084	-0.0948895	0.170181	-0.0291319	0.999213	-
494	263.14	3082.36	-0.352393	Feruloylputrescine	C10497	C14H20N2O3	-0.0890355	0.779657	0.0491843	0.82839	-3.53237	0.00146002	-0.268657	0.0992491	-0.83095	0.000751768	-2.4116	0.000227061	-0.425037	0.269514	-
495	263.163	8994.95	0.206096	Dehydrojuvabione; 5-Hydroxy-1-(4-hydroxyphenyl)-3-decanone	C09657; C17747	C16H24O3	-0.0203854	0.987896	0.0658685	0.754928	-0.622919	0.000812356	-0.17907	0.0758284	-0.388269	0.000862564	-0.474707	0.000438811	-0.176152	0.269514	-
496	264.074	14959.4	0.575864	5'-Dehydroadenosine	C11500	C10H11N5O4	0.368763	0.213919	0.0898044	0.653955	-0.0425205	0.94594	0.514326	0.00458801	0.266155	0.128104	0.22593	0.0832827	0.265987	0.716659	-
497	264.144	133559	0.0282184	Esprocarb	C14526	C15H23NOS	-0.0451067	0.915783	0.0593408	0.730554	-1.84958	0.000861503	-0.256003	0.0723819	-0.485148	0.000761552	-0.99228	1.34445e-05	-0.210123	0.304304	-
498	265.058	43875.2	0.69675	5'-Oxoinosine	C01993	C10H10N4O5	0.00390543	0.994449	0.12431	0.244672	0.0225338	0.884313	0.0257254	0.701007	-0.14084	0.350908	-0.0510537	0.576105	0.0276544	0.999213	-
499	265.094	50486.4	0.256981	8-Oxodeoxycoformycin	C02957	C11H14N4O4	0.0342003	0.987896	0.0596911	0.732997	-0.142799	0.653804	-0.851874	0.000310881	0.0116726	0.951994	0.0568716	0.349032	0.119267	0.798271	-
500	265.108	3.79236e+06	NA	Nevirapine; SB 200646	C07263; C11739	C15H14N4O	0.0832755	0.751845	0.0781326	0.640713	-0.940604	0.000642401	-0.166102	0.214098	-0.253655	0.034044	0.189397	0.774864	-0.127234	0.88231	-
501	266.062	225735	NA	Sulfisoxazole	C07318	C11H13N3O3S	0.0684032	0.890038	0.0494281	0.804076	0.027353	0.930851	-0.00288613	0.969006	-0.159957	0.164489	-0.0126455	0.91061	0.0267505	0.999213	-
502	266.089	93616.2	0.510326	Adenosine; Deoxyguanosine; Vidarabine; Zidovudine	C00212; C00330; C07195; C07210	C10H13N5O4; C10H13N5O4.	-0.0622574	0.784037	-0.444832	0.00674615	-0.598667	0.0165037	-0.59327	0.000915061	-0.0740476	0.54747	-0.0238633	0.816765	-0.00199564	0.999213	x
503	266.115	20822.6	0.142021	Agaritine	C01550	C12H17N3O4	0.0941281	0.728256	0.0425977	0.712455	-0.407454	0.0200795	-0.134604	0.130954	0.0604353	0.587354	-0.0345352	0.845588	-0.139813	0.716659	-
504	267.073	12358.9	0.609767	Inosine	C00294	C10H12N4O5	0.0392233	0.987896	-3.74518	0.00142272	-1.1745	0.000821061	-2.17032	0.000608857	-0.104582	0.414974	-0.0204836	0.873957	0.0481466	0.999213	x
505	267.098	4799.35	-0.0468408	Musk ambrette	C19461	C12H16N2O5	-0.0247469	0.987896	-0.0957129	0.605022	-0.727681	0.00309579	-0.593557	0.00217881	-0.241465	0.0875139	-0.293984	0.000440647	-0.0278307	0.999213	-
506	267.146	3165.18	-0.181673	Histidylleucine	C05010	C12H20N4O3	-0.0441594	0.959728	0.134259	0.583612	-1.48003	0.00119043	-0.377954	0.0495574	-0.057722	0.682452	-0.114117	0.27683	-0.154611	0.875565	-
507	267.233	12886.1	0.830399	omega-Cyclohexylundecanoic acid; 9E-Heptadecenoic acid	C12100; C16536	C17H32O2	0.0120437	0.994449	-0.219693	0.0556281	0.30572	0.388847	-0.455545	0.0201003	-0.168361	0.430041	-0.021209	0.884533	-0.00785727	0.999213	-
508	268.022	126732	0.718317	N-Acetyl-L-glutamate 5-phosphate	C04133	C7H12NO8P	0.0358636	0.987896	0.067168	0.480274	0.0978246	0.511476	0.00948016	0.899958	-0.0285054	0.913518	0.0822005	0.381362	0.0212797	0.999213	-
509	268.061	190891	0.657193	Evoxanthidine	C10668	C15H11NO4	0.0126282	0.991193	-0.217333	0.0248734	-0.0904659	0.169454	-0.144693	0.0276088	-0.156793	0.269717	0.0866529	0.488662	-0.0310534	0.999213	-
510	269.007	5.44182e+06	NA	3,5-Dinitro-4-hydroxyphenylpyruvate	C04286	C9H6N2O8	0.00125338	0.994449	0.0554986	0.697991	0.416779	0.00672522	0.851629	0.000229278	-0.0463039	0.776111	0.141435	0.14047	-0.0305679	0.999213	-
511	269.056	320173	0.601917	4,4'-Dinitrostilbene	C15296	C14H10N2O4	0.0414824	0.915783	0.0555619	0.314058	-0.0919439	0.299796	-0.187276	0.00594254	-0.0855791	0.51137	0.0846776	0.245212	-0.00459265	0.999213	-
512	269.212	179380	0.822944	16-Oxo-palmitate	C19614	C16H30O3	0.102392	0.892623	0.129476	0.185501	0.28008	0.189272	-0.517036	0.000821364	0.0974807	0.625384	0.190358	0.0688046	0.0228978	0.999213	-
513	269.249	210586	0.713651	Methyl palmitate	C16995	C17H34O2	0.126472	0.696968	-0.18161	0.078827	-0.128104	0.282044	-0.433022	0.00773359	-0.056955	0.818846	-0.00807308	0.954769	-0.01321	0.999213	-
514	271.113	275352	0.795977	Sotalol; 1a,11b-Dihydro-4,9-dimethylbenz[a]anthra[3,4-b]oxirene; 7-Hydroxym...	C07309; C19489; C19561; C19604	C12H20N2O3S; C20H16O	0.0230115	0.987896	-0.0141315	0.92943	0.00166448	0.996123	-0.272759	0.0115572	0.146976	0.376061	0.126436	0.118757	0.00329303	0.999213	-
515	271.228	27230.9	0.738369	16-Hydroxypalmitate	C18218	C16H32O3	0.0527839	0.965625	0.506448	0.00225564	-0.0446839	0.858082	1.42624	4.68048e-05	0.0659637	0.829445	0.157436	0.385944	0.0167496	0.999213	-
516	272.162	7029.59	0.493805	(2R,3R)-3-Methylglutamyl-5-semialdehyde-N6-lysine	C20279	C12H23N3O4	-0.0959391	0.775154	0.0131436	0.967082	-0.465658	0.223575	-0.122766	0.508851	0.0452892	0.823854	0.105571	0.247569	-0.0440858	0.999213	-
517	273.041	2888.51	0.364382	Athyriol; Bellidifolin; Isoathyriol; Swertianin; 2,2',4,4'-Tetrahydroxybenzil	C10052; C10053; C10069; C10092; C15218	C14H10O6	-0.0627574	0.927816	0.129068	0.329285	0.257152	0.141134	1.22087	0.00126291	0.130717	0.231008	0.0473518	0.539883	-0.0238083	0.999213	-
518	273.121	3940.7	0.499717	N2-Succinyl-L-arginine	C03296	C10H18N4O5	-0.0415711	0.987896	-0.0312107	0.922851	-0.0996034	0.899491	-0.0988923	0.563335	-0.311765	0.071622	-0.660625	0.0016551	-0.432104	0.0879114	-
519	273.193	4370.25	0.519942	(2R,3R)-3-Methylornithinyl-N6-lysine	C20278	C12H26N4O3	0.102755	0.787754	-0.224383	0.0959756	-0.22999	0.172433	-0.867542	0.00490242	-0.143365	0.482617	0.0760172	0.524779	0.00348533	0.999213	-
520	274.033	11133.7	0.00416952	6-Phospho-D-glucosaminate	C20589	C6H14NO9P	0.113889	0.820079	0.1287	0.0533423	0.540984	0.0241799	1.46076	0.00122526	0.103555	0.524672	0.173134	0.0538346	0.230223	0.884963	-
521	274.049	45656.9	0.577723	Paraoxon	C06606	C10H14NO6P	0.190086	0.538078	0.0903068	0.730859	-0.0025011	0.996123	0.0467218	0.652964	0.378549	0.0456846	0.157195	0.106187	-0.035554	0.999213	-
522	274.094	333292	0.0306292	Cardiospermin; 1,6-Anhydro-N-acetyl-beta-muramate	C08328; C19769	C11H17NO7	0.0959467	0.882169	0.0939804	0.651856	-0.119742	0.887241	-0.0989112	0.484121	0.768022	0.00383424	2.00195	0.000206663	0.153051	0.999213	-
523	274.104	133804	0.724272	(5-L-Glutamyl)-L-glutamine; N-Succinyl-L-citrulline	C05283; C18048	C10H17N3O6	-0.044459	0.94183	0.121919	0.613223	-0.18371	0.675659	-0.132382	0.332162	0.11119	0.229974	0.400632	0.00567234	0.160296	0.798271	-
524	275.021	18575.8	0.826297	5-(4-Acetoxybut-1-ynyl)-2,2'-bithiophene	C04485	C14H12O2S2	-0.173903	0.46575	0.249934	0.0351523	0.0887135	0.621825	-0.207901	0.00354737	-0.0649784	0.716238	-0.233351	0.0651509	0.056732	0.999213	-
525	275.089	19623	0.697546	Glutamyl-glutamic acid; (5-L-Glutamyl)-L-glutamate	C01425; C05282	C10H16N2O7	-0.0172778	0.987896	0.113398	0.480274	-0.399968	0.106672	-0.563739	0.00493694	0.116232	0.356122	-0.0116124	0.91061	0.098456	0.999213	x
526	275.124	3775.35	0.790815	N6-(L-1,3-Dicarboxypropyl)-L-lysine	C00449	C11H20N2O6	0.0620637	0.987454	0.0742248	0.712455	-0.0313639	0.964423	-0.124643	0.284663	0.0449991	0.843318	0.107502	0.285234	0.174101	0.716659	-
527	275.202	328792	0.788868	Stearidonic acid; Kinoprene	C16300; C19042	C18H28O2	-0.16124	0.701097	-0.0965614	0.531078	-0.046775	0.908066	-0.751583	0.00319796	-0.0483725	0.823623	-0.0575592	0.741489	-0.120631	0.798271	x
528	276.109	15312.2	0.196452	S-(2-Methylpropanoyl)-dihydrolipoamide	C04424	C12H23NO2S2	0.0724915	0.839699	0.125118	0.612058	-0.0311071	0.973073	-0.374677	0.0395782	0.119032	0.409883	0.147024	0.100645	-0.0129518	0.999213	x
529	277.12	12216.3	0.627779	alpha-Ribazole; Oxadixyl	C05775; C18753	C14H18N2O4	-0.0673251	0.986291	0.125446	0.426289	-0.618851	0.0196349	-0.0345897	0.758231	0.82077	0.0104395	1.10441	4.37704e-05	-0.043782	0.999213	x
530	277.181	2920.59	0.641558	Panaxytriol	C16792	C17H26O3	0.0297126	0.987896	0.0903014	0.657252	0.171865	0.192711	-0.0910189	0.382321	-0.133533	0.42746	0.0508981	0.655827	-0.00170642	0.999213	-
531	277.218	2263.93	0.626888	(6Z,9Z,12Z)-Octadecatrienoic acid; (9Z,12Z,15Z)-Octadecatrienoic acid; Crep...	C06426; C06427; C07289; C08315; C08364; C15201	C18H30O2	-0.289649	0.374807	-0.271374	0.0425984	-0.331659	0.110563	-1.01061	0.00354737	-0.855981	0.0018094	-0.629584	0.000438811	-0.392823	0.061604	-
532	278.059	28936.8	-0.85449	Cyprofuram	C18909	C14H14ClNO3	-0.0748131	0.987896	0.0801425	0.804076	-0.0151874	0.990066	-0.124355	0.393478	0.381768	0.16172	0.102368	0.735759	0.0561142	0.999213	-
533	278.139	2472.67	0.250954	Metalaxyl; Metalaxyl-M	C10947; C18626	C15H21NO4	0.121404	0.230117	0.0224977	0.927617	-0.366307	0.187687	0.327769	0.0181287	0.00336923	0.987971	0.328849	0.00851881	-0.0164727	0.999213	-
534	278.159	4714.89	0.634929	Tiocarbazil	C18898	C16H25NOS	-0.0550931	0.987896	0.0120858	0.960101	-2.30047	0.00155604	-0.313183	0.0701933	-0.536511	0.00396024	-0.965261	0.000602783	-0.232515	0.389656	-
535	278.989	8416.85	0.573335	Photinus luciferin	C02740	C11H8N2O3S2	0.301235	0.0951243	-2.51897	5.72681e-05	0.123236	0.511476	0.088943	0.389174	0.0430397	0.864855	-0.371743	0.00531224	0.021545	0.999213	-
536	279.056	44589.8	0.314926	Sulfamonomethoxine; Sulfamethopyrazine	C12540; C12616	C11H12N4O3S	0.185425	0.473095	-1.39058	0.00298325	-0.57656	0.00529933	0.0491149	0.635283	-0.0871713	0.626438	-0.227914	0.0014667	0.335176	0.378014	-
537	279.233	5566.59	0.827941	Linoleate; 9-cis,11-trans-Octadecadienoate; Chaulmoogric acid; Malvalic aci...	C01595; C04056; C08282; C08321; C08459	C18H32O2	-0.0428974	0.987896	-0.243899	0.0719291	-0.106869	0.788889	-0.838566	0.00754829	-0.688468	0.0156851	-0.255938	0.0345331	-0.191215	0.893369	-
538	280.105	6676.42	0.392757	1-Methyladenosine; O6-Methyl-2'-deoxyguanosine	C02494; C05031	C11H15N5O4	0.228448	0.448063	0.107295	0.671661	-0.0613856	0.933007	-0.150671	0.299992	0.0217909	0.886483	-0.0555424	0.68456	0.102163	0.999213	-
539	280.132	4551.49	NA	Pendimethalin	C11019	C13H19N3O4	-0.214438	0.525607	0.041859	0.787403	-0.370349	0.0425637	-0.0659917	0.541869	-0.414568	0.0156851	-1.22833	0.00194463	-0.162025	0.999213	-
540	281.053	15651.7	0.303723	9-Riburonosylhypoxanthine	C11631	C10H10N4O6	0.0331921	0.987896	-0.778419	0.0174289	-0.403786	0.053819	-0.00949201	0.93657	-0.0998597	0.478047	-0.349118	0.000333469	0.0379	0.999213	-
541	281.088	4939.94	0.198436	Xylobiose; beta-L-Arabinofuranosyl-(1->2)-beta-L-arabinofuranose; alpha-1,5...	C01630; C20568; C20570	C10H18O9	-0.0567506	0.986291	0.0180884	0.919434	0.00644591	0.990596	-0.100051	0.0659569	-0.0785528	0.682452	-0.708428	1.37263e-05	0.0771974	0.999213	-
542	281.141	37359.4	-0.251205	Hymenoxon; Qing Hau Sau; Dihydrophaseic acid	C09482; C09538; C15971	C15H22O5	0.00174017	0.994449	-0.0444115	0.804076	-0.159966	0.502575	0.0871495	0.308691	-0.127136	0.524672	-0.89751	4.39468e-05	-0.133014	0.78129	-
543	282.04	11994	0.622499	Fosthiazate	C18402	C9H18NO3PS2	-0.0197298	0.987896	-1.44062	0.00212106	-0.536327	0.00489361	-0.319482	0.0160917	-0.158979	0.33389	-0.139103	0.159824	-0.0504633	0.999213	-
544	282.074	3432.14	0.648492	Cucumopine	C08475	C11H13N3O6	0.0442839	0.987896	-1.60777	0.000782127	-0.41069	0.0811724	-1.6	0.000436337	-0.0723549	0.747723	-0.0563963	0.303288	0.07555	0.999213	-
545	282.084	1464.29	0.551532	Guanosine; Isoguanosine	C00387; C08432	C10H13N5O5	0.0635503	0.751845	-4.0336	0.000894302	-0.697714	0.0037684	-2.52616	0.000311613	-1.17793	0.000309098	-1.48202	1.20322e-05	0.0430174	0.999213	x
546	282.116	14024.7	NA	Morphinone; Acrophylline	C01735; C10634	C17H17NO3	0.00233652	0.994449	-0.142958	0.426667	-0.333847	0.0925685	-0.389992	0.0126094	-0.0138482	0.951994	-0.0931897	0.0697069	-0.02457	0.999213	-
547	283.105	5722.74	0.285231	Coformycin	C01677	C11H16N4O5	-0.00564844	0.994449	-0.10586	0.57803	-0.623028	0.00709811	-0.41592	0.00942101	0.0333449	0.886483	0.141072	0.0976265	0.166171	0.870211	x
548	283.229	60869.8	0.711803	2-Methoxy-5Z-hexadecenoic acid; 2-Methoxy-6Z-hexadecenoic acid; 12-(2,3-Dih...	C13792; C13946; C14996	C17H32O3	0.0750311	0.779657	-0.087029	0.389289	0.0908321	0.480253	-0.463856	0.000605111	-0.0563412	0.818846	-0.0219623	0.884533	0.0313209	0.999213	-
549	284.057	8655.38	-0.584805	5-Deoxy-5-chloroadenosine	C19768	C10H12ClN5O3	-0.0607115	0.788552	-0.0766023	0.500756	-0.0278625	0.92123	-0.156352	0.0551851	0.179997	0.0250994	0.167067	0.0746017	-0.019474	0.999213	-
550	284.125	15240.3	0.702992	HC Blue No. 2	C19429	C12H19N3O5	0.060825	0.986291	0.0527785	0.817588	-0.0493434	0.94594	-1.10739	0.00292439	0.0168403	0.948263	0.278266	0.00848061	0.17302	0.839692	-
551	284.162	5672.17	0.602892	Leu-Gly-Pro	C01833	C13H23N3O4	0.018912	0.991193	0.084249	0.684084	-0.146986	0.735025	-0.219495	0.0877941	0.0328367	0.905262	0.209703	0.0433139	0.0271694	0.999213	-
552	285.041	4482.65	0.153853	Luteolin; Kaempferol; Aureusidin; Maritimetin; Datiscetin; Fisetin; Isoscut...	C01514; C05903; C08576; C08720; C10036; C10041; C10097; C10184; C10510; C12134; C17786; C17810	C15H10O6	0.0671891	0.987896	1.28292	0.314058	0.780292	0.449555	6.74644	0.000307908	0.129241	0.495192	0.557758	0.000639604	-0.168502	0.185126	-
553	285.146	8600.41	0.530986	Abacavir	C07624	C14H18N6O	-0.0028356	0.994449	-0.0182919	0.945168	-0.0991329	0.837216	0.183389	0.153121	0.388787	0.0162101	0.124432	0.029657	0.0105884	0.999213	-
554	285.161	2219.61	NA	4-Dimethylallyl-L-abrine	C20410	C17H22N2O2	0.0267862	0.987896	0.0206637	0.92943	-0.0782933	0.908066	0.0145089	0.91384	-0.187308	0.345901	-0.45716	0.00334601	-0.073607	0.884963	-
555	285.182	969.459	-0.248488	N-Acetyl-leucyl-leucine	C11333	C14H26N2O4	0.222477	0.113896	0.000876527	0.997911	-0.345517	0.252674	0.0972459	0.561637	0.751765	0.000410977	0.0708701	0.336969	0.215965	0.646355	-
556	285.207	8003.99	0.60388	2,3-Dihydroxycyclopentaneundecanoic acid; Hexadecanedioate	C14987; C19615	C16H30O4	-0.0300857	0.987896	-0.259133	0.0761405	-0.0841856	0.844062	0.119717	0.32181	0.4389	0.00322354	0.242346	0.0312511	0.0333516	0.999213	-
557	285.243	3667.93	0.833934	3-Hydroxy-palmitic acid methyl ester; 2-Methoxyhexadecanoic acid	C11849; C13947	C17H34O3	0.0618309	0.987896	0.769422	0.00270861	0.0711334	0.770902	1.82708	4.03961e-06	0.155695	0.640656	-0.0567429	0.714677	0.101304	0.954337	-
558	286.033	4737.96	0.7417	AminoDAHP; 2-Amino-4,5-dihydroxy-6-oxo-7-(phosphonooxy)heptanoate	C12106; C20644	C7H14NO9P	-0.00311702	0.994449	0.151754	0.531078	0.134561	0.72641	1.09152	0.0006126	-0.0394449	0.879145	0.0688192	0.501014	-0.0224466	0.999213	-
559	286.105	6385.9	0.786215	Clavamycin E	C17365	C11H17N3O6	-0.0528744	0.987896	0.0525714	0.787403	-0.0338875	0.951998	-0.401799	0.00352864	0.13178	0.455406	0.206951	0.100325	-0.152647	0.999213	-
560	286.122	2872.76	0.706742	SR95531	C13796	C15H17N3O3	0.00728241	0.994449	0.0249326	0.927958	-0.00568558	0.995251	0.0293155	0.742588	0.13327	0.442427	0.23449	0.0349636	-0.0910977	0.999213	-
561	287.036	11874.1	-0.0852295	Terbufos	C18693	C9H21O2PS3	-0.0757725	0.690898	0.0588388	0.697991	0.096111	0.382171	0.683688	2.85988e-05	-0.122421	0.409019	-0.0335197	0.742084	-0.0299182	0.999213	-
562	288.022	7728.7	0.495637	Quinethazone	C07342	C10H12ClN3O3S	0.0400455	0.987896	-0.190905	0.71702	-0.137177	0.908301	0.390921	0.182251	0.0603717	0.765802	-0.0497109	0.792475	-0.050369	0.999213	-
563	288.049	6490.46	NA	PMEG	C11184	C8H12N5O5P	-0.191947	0.617048	0.185493	0.208906	0.0769413	0.844062	1.36319	0.00159807	0.197918	0.200596	0.259077	0.0996814	-0.197822	0.999213	-
564	288.072	6939.81	0.486164	N-Succinyl-2-L-amino-6-oxoheptanedioate; N-Succinyl-2-amino-6-oxopimelate	C04462; C05537	C11H15NO8	0.0309963	0.987896	-0.134037	0.581887	-0.100656	0.846973	-0.182279	0.162792	0.170359	0.228435	0.152925	0.29636	-0.147476	0.999213	-
565	288.096	3859.96	0.185469	2-Amino-4-oxo-6-(1',2',3'-trihydroxypropyl)-diquinoid-7,8-dihydroxypterin	C05253	C9H15N5O6	0.0211668	0.990554	0.0811633	0.711664	-9.64355e-05	0.999859	-0.186966	0.139712	0.0821167	0.571195	-0.408756	0.000635544	0.00139561	0.999213	-
566	289.016	10080	0.682826	Oxydisulfoton	C19009	C8H19O3PS3	0.0553693	0.927816	0.0662429	0.370396	-0.0523681	0.72641	0.186818	0.0152134	0.0282804	0.851439	-0.0688019	0.285234	-0.0193606	0.999213	-
567	289.084	160425	-0.0912654	N2-Malonyl-D-tryptophan	C03414	C14H14N2O5	-0.0396082	0.960224	0.0221855	0.931014	-0.0197673	0.97548	-0.0162961	0.903709	0.10327	0.555652	0.0852918	0.258686	-0.00173523	0.999213	-
568	289.098	2508.16	-0.140268	Oxyquinoline sulfate	C18478	(C9H7NO)2.	-0.0734611	0.991193	0.131742	0.531155	0.103876	0.844062	-0.00987885	0.927291	0.475901	0.26825	0.273987	0.466604	-0.263037	0.999213	-
569	289.112	3777.56	NA	Carbinoxamine	C06871	C16H19ClN2O	-0.0695886	0.987896	0.0148115	0.960101	-0.0158668	0.990066	-0.087796	0.572901	0.155882	0.480117	-1.13468	0.00631392	-0.095801	0.999213	-
570	289.116	795008	-0.653335	N-(L-Arginino)succinate	C03406	C10H18N4O6	-0.0243273	0.994449	0.0278613	0.922851	-0.100051	0.868437	-0.12059	0.383363	0.185121	0.447156	-1.07362	0.00832401	-0.0379382	0.999213	-
571	289.181	32747.9	0.468059	ML-236C	C14043	C18H26O3	0.0228947	0.987896	0.0236315	0.927617	-0.145711	0.696872	-0.189533	0.116138	0.0408841	0.68038	0.108771	0.459009	0.154054	0.646355	-
572	290.088	2.05637e+06	-0.0118543	2,7-Anhydro-alpha-N-acetylneuraminic acid; 2-Deoxy-2,3-dehydro-N-acetylneur...	C04521; C04580; C08341	C11H17NO8	0.306042	0.0676646	0.199665	0.329285	0.107332	0.844062	0.264769	0.0388889	0.273104	0.103504	0.291433	0.00450958	0.29709	0.057971	-
573	290.151	130790	NA	Eseridine	C09176	C15H21N3O3	0.0298621	0.987896	-0.00501827	0.96764	-0.224472	0.0758449	-0.162336	0.0331895	-0.0692245	0.741908	-0.096911	0.469792	0.110592	0.981279	-
574	291.016	49076.3	0.539787	5-(3-Hydroxy-4-acetoxybut-1-ynyl)-2,2'-bithiophene	C04711	C14H12O3S2	-0.187834	0.448063	0.403915	0.000722169	0.418385	0.0685003	1.09478	0.000362901	0.308341	0.154492	-0.0553373	0.67693	-0.381962	0.0720473	-
575	291.043	11772	0.0714111	Clofop	C19070	C15H13ClO4	-0.0478952	0.96593	0.0828179	0.434818	0.107316	0.095118	0.0441231	0.587362	0.0252166	0.914201	0.00121396	0.998054	0.00613504	0.999213	-
576	291.057	5559.99	0.502195	Etrimfos	C18985	C10H17N2O4PS	-0.0207006	0.987896	-0.0242718	0.875278	0.0658527	0.536828	0.222874	0.0336544	-0.0140717	0.951994	0.0682937	0.401327	-0.0854108	0.88231	-
577	291.148	2283.33	0.50039	16-Epivellosimine; Vellosimine; Cinchoninone; Cinchonidinone	C11633; C11634; C16726; C16846	C19H20N2O	0.0643694	0.987896	0.0371963	0.746091	-0.237117	0.0630002	-0.279341	0.0955436	-0.217139	0.33389	-0.498448	0.000107239	-0.0952235	0.999213	-
578	292.984	99353.9	0.502924	2-Deoxy-D-ribose 1,5-bisphosphate; D-Ribose 1-diphosphate	C04175; C06248	C5H12O10P2	0.0344395	0.987896	0.176455	0.233816	0.157627	0.110165	0.232243	0.0201003	-0.00433042	0.985114	0.182775	0.261174	0.0184805	0.999213	-
579	293.067	288354	0.54096	Cyclic dehypoxanthine futalosine	C17017	C14H14O7	0.0591838	0.941181	-0.011924	0.919434	0.661567	0.0527552	1.32353	0.00147894	-0.113763	0.417969	-0.0530874	0.461977	0.0176977	0.999213	-
580	293.1	4602.22	0.37281	N-Glycosyl-L-asparagine	C03411	C10H18N2O8	-0.0565333	0.927816	0.0704126	0.712455	-0.0330652	0.958686	-0.243784	0.0531859	0.158426	0.182619	-9.44632e-05	1	-0.132633	0.806425	x
581	293.115	4638.19	0.742086	Aspartame	C11045	C14H18N2O5	-0.0086459	0.994449	0.0862693	0.698025	-0.823834	0.00219394	-0.112391	0.327613	0.0219979	0.875233	-0.111458	0.136744	-0.0321913	0.999213	-
582	293.212	35809.2	0.841584	(9Z)-(13S)-12,13-Epoxyoctadeca-9,11-dienoic acid; 8-[(1R,2R)-3-Oxo-2-{(Z)-p...	C04594; C04780; C13798; C14765; C14766; C16316; C16326; C16342; C16346; C19613; C19827	C18H30O3	-0.0773427	0.890038	0.0450034	0.733814	0.0297102	0.933007	-0.553979	0.00354737	0.79694	0.000298726	0.0704568	0.429707	0.245538	0.884963	x
583	294.053	7872.11	0.349724	Acetylsulfamethoxazole	C13061	C12H13N3O4S	0.0560976	0.962256	-0.0816878	0.836781	0.917039	0.0811724	0.449897	0.137121	-0.176211	0.130292	-0.0899533	0.569136	0.0672861	0.999213	-
584	294.147	125538	NA	Butralin	C18582	C14H21N3O4	-0.016082	0.994449	-0.00971612	0.960101	-0.262783	0.201869	0.0474704	0.690777	-0.28928	0.0796873	-0.560897	0.000378119	-0.11961	0.999213	-
585	295.086	27321.2	NA	2,3,9,10-Tetrahydroxyberberine	C12331	C17H14NO4	0.133991	0.148304	-0.175824	0.232651	-0.290887	0.130351	-0.169748	0.0457418	-0.139184	0.31762	-0.0192599	0.759647	-0.0862193	0.999213	-
586	295.094	4163.87	0.794932	4-Nitrophenyl-3-ketovalidamine; Medinoterb acetate	C03995; C19068	C13H16N2O6	-0.0399979	0.987896	0.0815271	0.653955	-0.82689	0.00138846	-0.130509	0.169316	-0.00932566	0.958212	0.147743	0.131368	-0.0926676	0.981279	-
587	295.192	3686.82	0.69659	10-Deoxymethynolide	C11993	C17H28O4	-0.0332723	0.987896	-0.00901058	0.961057	0.150413	0.372024	-0.576217	0.000197542	0.0937418	0.229546	0.063768	0.711595	0.0164744	0.999213	-
588	295.228	11566.9	0.903917	(9Z,12Z)-(8R)-Hydroxyoctadeca-9,12-dienoic acid; Vernolic acid; 13(S)-HODE;...	C08318; C08368; C14762; C14767; C14825; C14826; C19617	C18H32O3	0.0415045	0.987896	-0.047721	0.71702	0.276379	0.29452	-1.84475	0.000184011	0.579444	0.00409822	0.0346999	0.822325	-0.0010453	0.999213	x
589	295.264	3232.54	0.848659	Oleic acid methyl ester; 17-Methyl-6Z-octadecenoic acid; Lactobacillic acid	C03425; C13787; C13838	C19H36O2	0.0646939	0.987896	0.000110539	0.99913	0.441795	0.154505	-0.427268	0.0414511	-0.0751833	0.689227	0.0471959	0.884533	0.0977141	0.999213	-
590	296.072	27743.7	0.570128	6-Nitrobenzo[a]pyrene; 3-Nitroperylene	C19472; C19475	C20H11NO2	-0.0757027	0.927816	0.00784059	0.93316	0.0283381	0.817383	-1.90243	4.03961e-06	-0.0801932	0.639625	0.0213041	0.812542	-0.13124	0.0720473	-
591	296.141	7623.21	0.953068	GA	C11484	C17H19N3O2	-0.0562804	0.987896	0.0488914	0.841085	-0.0874519	0.844062	-0.435424	0.033616	-1.83894	0.00128086	-1.91765	0.00194463	0.204713	0.999213	-
592	297.04	3724.13	NA	Bowdichione; Irilone; 2',7-Dihydroxy-4',5'-methylenedioxyisoflavone; Aflato...	C10202; C10467; C16226; C19587; C19727	C16H10O6	0.0831836	0.778162	0.0323555	0.827214	0.0638674	0.837216	0.409253	0.0175702	-0.0364887	0.823854	-0.0497659	0.53178	0.0958012	0.999213	-
593	297.045	47914.6	0.0690111	Quinalphos; Phoxim	C11030; C18757	C12H15N2O3PS	-0.00651721	0.994449	0.0924387	0.40798	0.145209	0.594688	0.663272	0.012815	-0.00742829	0.971079	-0.0778153	0.377387	-0.0409134	0.999213	-
594	297.064	6427.57	NA	5'-S-Methyl-5'-thioinosine	C19787	C11H14N4O4S	-0.0823171	0.787754	-0.011403	0.828735	0.137299	0.128528	-0.0676897	0.323285	0.0743694	0.137199	0.0309645	0.62692	-0.0889993	0.999213	-
595	297.07	23417.6	-0.705787	Mefenacet	C14525	C16H14N2O2S	-0.0892459	0.751845	0.0998905	0.550079	0.300553	0.251389	0.275783	0.0716241	0.289172	0.0196326	0.120175	0.317654	-0.00840099	0.999213	-
596	297.107	54723	0.837673	10-(beta-Dimethylaminopropionyl)phenothiazine	C17619	C17H18N2OS	-0.0382621	0.987896	0.00067731	0.997847	0.0130691	0.97548	-0.048187	0.208892	-0.133813	0.409152	-0.127426	0.130664	0.0754868	0.999213	-
597	297.209	3419.05	0.834506	Plakortic acid	C17158	C17H30O4	-0.0418383	0.959728	0.102198	0.37499	0.147562	0.722855	-0.498355	0.000845527	-0.177915	0.14889	-0.0651828	0.599357	-0.132475	0.704559	-
598	297.244	104766	0.772327	2-Oxooctadecanoic acid; Ricinoleic acid; (6R,7S)-6,7-Epoxyoctadecanoic acid...	C00869; C08365; C13791; C19418; C19616	C18H34O3	0.168072	0.743765	0.310844	0.0328467	0.268004	0.388847	-0.635745	0.00354737	0.0791948	0.84352	0.0821555	0.43924	0.0509286	0.999213	-
599	297.279	116245	0.676667	Nonadecanoic acid; Tuberculostearic acid	C16535; C16794	C19H38O2	0.0682913	0.926338	0.0796435	0.727459	0.108232	0.467413	-0.290626	0.00339635	-0.127801	0.643762	0.0710424	0.469792	-0.0778766	0.999213	-
600	298.019	1.03656e+06	0.584064	1-Methylseleno-N-acetyl-D-galactosamine	C18893	C9H17NO5Se	0.0320985	0.987896	0.0114982	0.947355	0.163391	0.188598	0.215588	0.0178041	-0.016314	0.951994	0.0819334	0.334916	-0.0277552	0.999213	-
601	298.07	64985.5	-0.368543	D-4'-Phosphopantothenate	C03492	C9H18NO8P	0.0490826	0.927816	0.0527228	0.813055	0.0305897	0.951998	-0.0721636	0.403065	0.264548	0.104351	0.0882186	0.351993	-0.0111337	0.999213	-
602	298.085	6044.29	0.649157	Imipenem	C06665	C12H17N3O4S	-0.0834188	0.787754	0.011163	0.953259	0.235176	0.486898	0.0699603	0.60217	-0.271782	0.0267333	-0.114722	0.310778	-0.055667	0.999213	-
603	298.275	7092.59	0.590485	Sphingosine; 3-Dehydrosphinganine; Palmitoylethanolamide	C00319; C02934; C16512	C18H37NO2	-0.256916	0.693974	0.246861	0.250027	0.138014	0.280292	-0.459086	0.0146481	2.36525	0.0083863	0.00487233	0.987144	-0.165835	0.999213	-
604	299.02	2842.8	0.258699	Pseudopurpurin	C10394	C15H8O7	-0.339539	0.00380168	0.424794	0.0131199	0.395173	0.0441501	2.1011	2.19213e-08	-0.0503154	0.739406	0.321514	0.00490012	-0.232087	0.140344	x
605	299.056	6283.48	0.398209	Chrysoeriol; 3-Methoxyapigenin; Leptosidin; Diosmetin; Hispidulin; Kaempfer...	C04293; C05902; C08651; C10038; C10058; C10098; C10203; C10520; C10534; C12135; C16227; C16228; C16230; C17059; C17811	C16H12O6	0.0426974	0.987896	0.429084	0.00485273	0.228235	0.438864	0.244333	0.100136	0.0301178	0.880068	0.0601226	0.4758	-0.0182105	0.999213	-
606	299.259	4622.33	0.622891	(R)-2-Hydroxystearate; (S)-2-Hydroxystearate; (R)-10-Hydroxystearate	C03042; C03045; C03195	C18H36O3	0.0682774	0.890038	0.53296	0.185501	-0.0485784	0.944556	3.19242	2.37183e-05	-0.0284909	0.931144	0.00959027	0.940261	-0.0121349	0.999213	-
607	300.065	7083.32	NA	Peonidin	C08726	C16H13O6.	0.0274336	0.987896	0.150658	0.210891	0.0692217	0.89585	-0.0665813	0.533976	-0.0705976	0.813831	0.123139	0.151993	0.0304584	0.999213	-
608	300.071	3381.29	0.129202	4-Nitrophenol-alpha-D-galactopyranoside	C04452	C12H15NO8	-0.0112639	0.994449	0.110891	0.37499	0.00501443	0.995251	-0.271658	0.0324544	0.111052	0.528451	0.127608	0.0524189	0.0219857	0.999213	-
609	300.136	12591.1	0.770808	Febrifugine; Isofebrifugine	C10677; C10698	C16H19N3O3	-0.0991375	0.987896	0.0536868	0.761719	-0.334538	0.162221	-0.112879	0.226412	-0.156011	0.546636	-0.124512	0.557282	-0.0471718	0.999213	-
610	300.156	7238.45	0.759361	(Ac)2-L-Lys-D-Ala	C02487	C13H23N3O5	0.0656761	0.986291	0.0669658	0.737773	-0.0226342	0.97548	0.29226	0.034733	0.0166017	0.930777	0.166479	0.0105183	-0.0470718	0.999213	-
611	301.035	5116.81	0.00842497	Quercetin; 8-Hydroxykaempferol; 2'-Hydroxypseudobaptigenin; Bracteatin; 6-H...	C00389; C02806; C03662; C08577; C10068; C10072; C10078; C10079; C10105; C10177; C10192; C15031	C15H10O7	-0.151652	0.448063	2.42474	0.0282767	1.51218	0.0277519	6.71776	0.000354303	0.266717	0.0159068	0.527761	0.00113975	-0.124878	0.839692	-
612	302.136	92114.3	0.758689	Nicotianamine	C05324	C12H21N3O6	-0.0105775	0.991193	0.118919	0.583612	-0.226914	0.511476	-0.312828	0.0455637	0.169169	0.0818454	-0.0990254	0.222576	0.0374236	0.999213	-
613	302.152	6156.93	0.636386	N(6)-[(Indol-3-yl)acetyl]-L-lysine	C04211	C16H21N3O3	0.137702	0.634045	0.0381555	0.871514	-0.657787	0.0264572	-0.189809	0.172352	0.337777	0.0456059	0.179585	0.156909	0.200624	0.999213	-
614	303.032	763.713	NA	IPSP	C19000	C9H21O3PS3	-0.0271239	0.991193	-0.306412	0.00142138	-0.284926	0.00136798	1.24139	0.000756625	0.224424	0.0303385	-0.027196	0.884533	-0.0394605	0.999213	-
615	303.051	5622.48	0.223054	Taxifolin; Pentahydroxyflavanone; cis-Dihydroquercetin	C01617; C05911; C12316	C15H12O7	-0.0901532	0.26639	-0.33691	0.166516	-0.447709	0.0573979	0.685246	0.000758704	0.148173	0.0777469	0.0586307	0.524779	-0.166845	0.885052	-
616	303.087	48538.7	-0.608372	beta-Cotonefuran; 6-Methoxy-alpha-pyrufuran; (S)-Chiral alcohol; (S)-Hemike...	C08740; C08761; C18354; C18356; C18360; C18836	C16H16O6	-0.0731375	0.927816	-0.0928236	0.727228	-0.157858	0.601362	-0.0169916	0.8839	0.0215628	0.914201	-0.441795	0.0125023	-0.0815583	0.999213	-
617	303.233	6352.17	0.728324	Arachidonate; Acutilol A; 2-Ketoepimanool; Taxa-4(20),11(12)-dien-5alpha,13...	C00219; C09057; C09124; C11897; C14493; C14605; C14956; C15176; C15252; C15367; C17920; C20329	C20H32O2	0.124218	0.882324	-0.197679	0.199053	-0.0757464	0.89585	-0.629426	0.0317117	-0.144838	0.686038	-0.0687495	0.741489	-0.181434	0.999213	-
618	303.997	16011.4	0.451501	Isoimide; Imide	C10971; C10972	C14H12BrNO2	0.864554	0.172637	2.88106	2.6538e-08	2.9995	0.000626231	0.415725	0.376157	0.552369	0.455406	0.225791	0.616936	0.0865754	0.999213	-
619	304.019	4888.88	NA	2,4-Dinitro-1-(3-nitrophenoxy)benzene	C15297	C12H7N3O7	0.02721	0.987896	-0.194675	0.0851159	-0.049438	0.819769	-0.771329	4.68048e-05	0.103805	0.442427	0.121499	0.0120126	0.000452729	0.999213	-
620	304.034	4058.84	0.605139	3',5'-Cyclic CMP; 2',3'-Cyclic CMP	C00941; C02354	C9H12N3O7P	0.0381087	0.984399	0.0202309	0.927617	-0.0637525	0.896108	-1.26767	0.000803005	-0.0937851	0.441283	0.064449	0.599357	-0.0152004	0.999213	x
621	304.079	58926.2	0.74871	Convicine	C08430	C10H15N3O8	0.133406	0.731766	-0.42801	0.0254779	-0.518211	0.00924026	-0.929724	0.00529932	0.0252689	0.867926	0.0347611	0.774864	0.100961	0.999213	-
622	304.12	517487	-0.410062	Zaleplon	C07484	C17H15N5O	0.0135996	0.994449	0.0786505	0.775842	-0.249002	0.3318	-0.43825	0.097638	0.543207	0.00366207	0.34217	0.0139134	-0.0390382	0.999213	-
623	305.018	52128.5	0.53712	2',3'-Cyclic UMP	C02355	C9H11N2O8P	0.00307115	0.994449	0.0495612	0.767325	-0.0257596	0.963961	-0.956193	0.00123031	-0.618149	0.0012878	0.0397467	0.611406	-0.0625688	0.999213	-
624	305.051	7654.37	NA	Isoprothiolane sulfoxide	C11112	C12H18O5S2	-0.015209	0.987896	-0.532853	0.0805253	-0.592985	0.128862	-0.369922	0.1315	-0.0173151	0.86802	0.0988838	0.435552	0.00888791	0.999213	-
625	305.068	6583.97	NA	Leucocyanidin; (+)-Gallocatechin; (-)-Epigallocatechin	C05906; C12127; C12136	C15H14O7	-0.0836206	0.987896	-0.40857	0.00596122	-0.434222	0.00134064	-0.540244	0.00252784	-0.118285	0.58096	0.0845406	0.362568	-0.251662	0.788677	-
626	305.136	2762.99	0.65179	Lupinate	C01513	C13H18N6O3	0.0536043	0.857253	0.0687812	0.712455	-0.357602	0.0882737	-0.264263	0.0668644	0.160297	0.345901	0.0301854	0.7755	0.0712848	0.999213	-
627	306.05	4420.43	0.543957	dCMP	C00239	C9H14N3O7P	0.109503	0.939067	-0.338934	0.00186604	-0.355955	0.00522498	-0.39946	0.000502961	0.0966454	0.63841	0.166679	0.219085	-0.0823193	0.999213	-
628	306.078	6386.04	0.562309	Stealthin C	C12392	C18H13NO4	-0.0507388	0.987896	-0.140976	0.314207	-0.409332	0.0699131	-0.410396	0.00958016	1.15972	0.000670439	1.44387	4.28745e-05	-0.0335683	0.999213	-
629	306.084	19306.7	0.220521	S-Succinyldihydrolipoamide	C01169	C12H21NO4S2	0.225586	0.359097	-0.0380274	0.917711	-0.333276	0.390067	-0.460599	0.0651405	0.604205	0.0011419	0.560118	0.000785706	0.190454	0.999213	-
630	306.997	4180.34	0.590868	(R)-5-Diphosphomevalonate; alpha-D-Ribose 1-methylphosphonate 5-phosphate; ...	C01143; C20423; C20848	C6H14O10P2	-0.35273	0.959728	-0.413331	0.254017	-0.267744	0.712263	-0.55622	0.692238	-0.294491	0.795186	0.252844	0.70237	-0.21539	0.999213	-
631	307.084	3511.73	NA	Allamandin	C09766	C15H16O7	-0.234165	0.515202	0.18701	0.671661	-0.269977	0.736378	-1.20307	0.025719	0.00396692	0.987971	0.198272	0.1812	-0.267119	0.870211	-
632	307.151	45675.9	0.842728	Fructoselysine	C16488	C12H24N2O7	0.261901	0.117374	0.0698745	0.612058	0.0551079	0.899491	-0.946847	1.52298e-05	-0.887458	0.104388	-0.757995	0.000232084	0.129271	0.870211	x
633	307.191	3726.14	0.601417	5-O-Methylembelin; Soraphen O	C10373; C15818	C18H28O4	-0.0529766	0.991193	-0.0213418	0.967584	0.131199	0.840918	-0.196026	0.129715	-0.0836098	0.920546	0.604722	0.262026	0.178116	0.999213	-
634	308.078	7081.78	0.62714	Isotan B; 7-Deoxypancratistatin	C08494; C12255	C14H15NO7	-0.114667	0.537676	-0.0619877	0.737773	-0.226937	0.582608	-0.578907	0.00448981	-0.200212	0.13045	-0.494454	0.00237139	-0.021309	0.999213	-
635	308.092	3808.95	NA	Lunamarine	C10713	C18H15NO4	-0.189626	0.46575	0.043405	0.903646	-0.0203443	0.990066	-0.998112	0.00958093	-0.90782	0.000799826	-0.864784	0.00101213	0.0750164	0.999213	-
636	308.099	3820.63	0.225179	N-Acetylneuraminate; O-Acetylneuraminic acid; N-Acetyl-alpha-neuraminate; N...	C00270; C03525; C19909; C19910	C11H19NO9	-0.115236	0.575139	0.119111	0.697991	-0.234882	0.621825	-1.06453	0.00458801	-2.12507	0.000659604	-2.13755	8.50597e-05	0.039175	0.999213	x
637	308.162	17122.2	0.270554	Isopropalin	C19063	C15H23N3O4	-0.0211213	0.987896	-0.0186972	0.909668	-0.352727	0.0789741	-0.330198	0.00775763	-0.144614	0.345901	-0.0577549	0.476786	-0.0322641	0.999213	-
638	309.039	7826.83	NA	6-Demethylsterigmatocystin	C03683	C17H10O6	0.0871331	0.778162	0.0533284	0.733814	0.06349	0.819769	-0.081829	0.195495	0.0387017	0.758088	0.0382031	0.382237	-0.0557329	0.999213	-
639	309.067	20671.9	NA	Sulfadoxine	C07630	C12H14N4O4S	-0.0348854	0.987896	-0.0290139	0.860092	-0.242209	0.0441501	0.0053821	0.912762	0.073167	0.686038	0.138606	0.000954078	0.00864578	0.999213	-
640	309.207	4137.18	0.761352	13(S)-HPOT; (9Z,12Z,15Z)-(7S,8S)-Dihydroxyoctadeca-9,12,15-trienoic acid; D...	C04785; C07357; C15753; C16321; C16341; C19936; C20704	C18H30O4	-0.00210942	0.994449	0.002465	0.992589	0.0636145	0.899491	-0.395334	0.00611336	0.322981	0.00869407	0.182733	0.0474698	0.0181927	0.999213	-
641	309.28	2824.69	0.888682	Prostanoic acid; Icosenoic acid	C02064; C16526	C20H38O2	0.133985	0.833862	-0.204995	0.253777	-0.316786	0.128862	-0.623526	0.0110945	-0.0280509	0.947556	0.02411	0.909711	-0.0989555	0.999213	-
642	310.126	400987	0.286073	Citalopram alcohol	C16611	C19H18FNO2	0.0245421	0.987896	-0.000733557	0.9979	-0.211511	0.447621	-0.525026	0.0106081	-0.546444	0.0129644	-0.467243	0.0165266	0.0079549	0.999213	-
643	311.065	106150	0.276133	Inosine-5'-carboxylate	C03280	C11H12N4O7	-0.0230321	0.987896	-0.0398768	0.612058	0.0146257	0.964336	-0.208581	0.0218153	-0.00142031	0.990951	0.00798721	0.947361	0.000699418	0.999213	-
644	311.099	3782.59	NA	Vicianose; Arabino-galactose; 6-O-beta-D-Xylopyranosyl-D-glucose; 6-O-(beta...	C01625; C07285; C08245; C11535	C11H20O10	-0.159633	0.644923	0.0469349	0.810939	-0.115448	0.72641	-0.278713	0.0302717	-0.0696857	0.717093	-0.164149	0.0502465	-0.112068	0.884963	-
645	311.109	11010	0.439268	PS-6; Penicillin F	C17371; C17402	C14H20N2O4S	0.0229944	0.987896	0.0703113	0.767325	-0.288714	0.268731	-0.796915	0.000915061	-0.20379	0.406892	-0.455618	0.00220577	-0.0448556	0.999213	-
646	311.197	3007.87	-0.276737	Oseltamivir; Oseltamivir phosphate	C08092; C08093	C16H28N2O4; C16H28N2O4.	0.510485	0.00728341	-0.0752241	0.612058	-0.00692001	0.990066	-0.5196	0.000368122	0.13986	0.231753	0.0431114	0.740228	1.04264	0.00673406	-
647	311.223	4008.21	0.657563	(9Z,11E)-(13S)-13-Hydroperoxyoctadeca-9,11-dienoic acid; (9Z,12Z)-(11S)-11-...	C04717; C07338; C07354; C14827; C14831; C14832; C14834; C14836; C19618; C19937; C20186; C20703	C18H32O4	0.10322	0.533642	0.0495524	0.776023	0.136978	0.72641	-0.332016	0.0308165	0.314102	0.0104395	0.16964	0.0855298	0.0904417	0.716659	-
648	311.295	15327.1	0.554568	Phytanate; Icosanoic acid	C01607; C06425	C20H40O2	0.0307594	0.987896	-0.10707	0.633181	-0.0582239	0.594688	-0.193082	0.0314514	-0.0547128	0.740385	0.0553144	0.692467	-0.0311624	0.999213	-
649	312.06	60673.1	NA	2-(Formamido)-N1-(5'-phosphoribosyl)acetamidine	C04640	C8H16N3O8P	-0.49327	0.17952	0.0764504	0.703678	0.0441458	0.908066	-0.558812	0.00541959	-0.280426	0.0834995	7.03308e-05	1	-0.231724	0.795727	-
650	312.067	23020.9	0.669129	Albendazole-beta-hydroxysulphone; Albendazole-gamma-hydroxysulphone	C16628; C16629	C12H15N3O5S	-0.380634	0.230117	0.100151	0.189109	0.0682279	0.502575	-1.2706	4.71815e-07	-0.262102	0.124987	-0.209248	0.137143	-0.419842	0.018743	-
651	313.039	4661.61	0.0294802	Clorazepate	C06921	C16H11ClN2O3	0.00608715	0.994449	0.862874	0.00384185	2.33433	0.0908885	1.91305	0.00180769	-0.0406165	0.836313	0.109633	0.0408604	0.0787521	0.999213	-
652	313.051	5814.96	0.713745	Malaoxon	C07498	C10H19O7PS	-0.00770985	0.994449	0.362656	0.0157323	1.01589	0.108837	0.78933	0.00327225	-0.122295	0.345901	5.77331e-05	1	-0.000801655	0.999213	-
653	313.238	24911.7	0.856387	(9Z)-(7S,8S)-Dihydroxyoctadecenoic acid; 9,10-DHOME; 12,13-DHOME; 9,10-Epox...	C07355; C14828; C14829; C19620; C20702	C18H34O4	0.255358	0.473095	0.397518	0.00813638	0.366486	0.235914	0.329311	0.0136611	0.41362	0.00876631	0.175353	0.127421	-0.0572744	0.999213	x
654	314.136	32382.6	0.329781	Clavamycin D	C17364	C13H21N3O6	0.00358845	0.994449	0.0616753	0.767325	0.0338025	0.966493	-0.814267	0.00458302	0.0138408	0.955016	0.0657813	0.270915	0.0244104	0.999213	-
655	315.051	5003.85	0.401076	3-O-Methylquercetin; Capillarisin; Azaleatin; Isorhamnetin; Pedalitin; Pino...	C04443; C08999; C10022; C10084; C10119; C10120; C10176; C10185; C10188; C19739	C16H12O7	-0.0984885	0.987896	0.905763	0.178655	0.518701	0.382171	5.52387	0.000364129	-0.0724774	0.762155	0.44178	0.00949479	-0.0903431	0.999213	-
656	315.254	2293.55	0.885039	(9R,10R)-Dihydroxyoctadecanoic acid; (9S,10S)-9,10-Dihydroxyoctadecanoate; ...	C08314; C15988; C19622	C18H36O4	0.204891	0.775311	0.805521	0.000744346	0.456598	0.117353	1.13978	1.0181e-05	-0.209395	0.197974	0.163148	0.0595556	-0.482272	0.999213	-
657	315.997	28205.9	0.613955	Azinphos-methyl	C11018	C10H12N3O3PS2	-0.00828567	0.994449	0.0873674	0.712455	0.111897	0.799456	0.164872	0.149658	0.053357	0.747753	0.129582	0.184733	0.026888	0.999213	-
658	317.03	20634.4	0.359323	Gossypetin; Myricetin; Quercetagetin	C04109; C10107; C10122	C15H10O8	-0.0145486	0.991193	0.963637	0.338733	0.553252	0.511476	5.75547	0.000413604	0.0594403	0.724108	-0.00772291	0.9647	-0.0490227	0.999213	-
659	318.095	6616.42	0.813111	Tetrodotoxin	C11692	C11H17N3O8	-0.0730891	0.802024	0.0533443	0.817094	-0.123062	0.799456	-0.357791	0.0145591	0.233364	0.0580182	0.0273088	0.816765	0.0233834	0.999213	-
660	319.046	5124.97	-0.035695	Dihydromyricetin; 2,3-Dihydrogossypetin; 2,2',3-Trihydroxy-3'-methoxy-5,5'-...	C02906; C03052; C18348	C15H12O8	-0.00901766	0.987896	-0.0225359	0.849737	0.124388	0.00971394	0.332925	0.00354737	0.12	0.25753	0.137691	0.157953	-0.0340104	0.999213	-
661	319.111	5461.02	0.715772	Alangimarine	C09329	C19H16N2O3	0.160224	0.511827	0.0954814	0.622207	-0.188064	0.539538	-0.16623	0.126078	0.0637257	0.747753	0.12933	0.0634767	0.0648727	0.999213	-
662	320.129	5411.94	0.697917	Acronycine; Pyriproxyfen	C10632; C18605	C20H19NO3	-0.0181742	0.987896	0.104311	0.640713	-0.129654	0.807705	-0.14556	0.210845	0.361477	0.0285	0.234757	0.0356822	0.14782	0.88231	-
663	321.048	5284.45	NA	dTMP	C00364	C10H15N2O8P	-0.0494526	0.987896	-0.589064	0.025144	-0.438768	0.00554668	-0.798404	0.000146335	-0.0389496	0.86929	0.0170464	0.873578	0.0748241	0.999213	-
664	321.113	2428.85	0.859646	N-((R)-Pantothenoyl)-L-cysteine; Abyssinone I; (-)-Phaseollin; 6-(3,3-Dimet...	C04079; C09318; C10514; C11324; C11325	C12H22N2O6S; C20H18O4	0.0182021	0.994449	0.00456978	0.967584	-0.0300484	0.931569	-0.257736	0.00251165	0.167604	0.21042	0.115181	0.320892	0.164536	0.999213	-
665	321.171	31697.3	0.59436	alpha-Zearalanol; beta-Zearalanol	C14752; C14753	C18H26O5	-0.0404158	0.987896	-0.106773	0.620209	-0.260109	0.227633	-0.364787	0.0395782	0.142093	0.457178	0.0681535	0.591212	-0.0260808	0.999213	-
666	321.244	151290	0.823689	2alpha-(Hydroxymethyl)-5alpha-androstane-3beta,17beta-diol; 17alpha-Methyl-...	C14970; C15285	C20H34O3	-0.0603026	0.987896	-0.0656447	0.633759	-0.290258	0.035074	-0.443554	0.00137013	-0.0737678	0.716167	0.00682636	0.976528	-0.0624944	0.999213	-
667	322.044	10008.9	0.880033	CMP; Cytidine 2'-phosphate; 3'-CMP	C00055; C03104; C05822	C9H14N3O8P	0.252491	0.233999	-0.0702053	0.685935	-0.0539286	0.899548	-0.565212	0.000576801	0.242869	0.148452	-0.323814	0.00309733	0.20403	0.483578	-
668	322.117	5973.11	0.748005	Bialaphos	C06457	C11H22N3O6P	-0.190301	0.624394	0.0528152	0.737412	-0.122917	0.621825	-0.245915	0.0255226	-0.131455	0.734871	0.149028	0.314332	-0.0683562	0.999213	-
669	322.967	14394.4	-0.184189	Azamethiphos	C18702	C9H10ClN2O5PS	0.0126023	0.987896	-2.80326	0.000782127	0.174852	0.460061	0.350359	0.01914	-0.0356848	0.846918	-0.0640579	0.249519	0.0315937	0.999213	-
670	323.019	326201	NA	5-O-(1-Carboxyvinyl)-3-phosphoshikimate	C01269	C10H13O10P	0.0192593	0.987896	-0.115121	0.451705	0.0365961	0.94594	-0.194372	0.0754865	-0.0331932	0.85806	-0.0641345	0.215529	0.00159384	0.999213	-
671	323.028	22490.8	0.86753	UMP; Pseudouridine 5'-phosphate; 3'-UMP; Uridine 2'-phosphate	C00105; C01168; C01368; C03031	C9H13N2O9P	0.0842433	0.842758	-0.0830395	0.640713	-0.0695751	0.89585	-0.31397	0.00949057	0.0600565	0.747723	-0.152168	0.0180232	-0.0341011	0.999213	-
672	323.099	10096.1	-0.186384	Bis-D-fructose 2',1:2,1'-dianhydride; D-Fructofuranose 1,2':2,3'-dianhydride	C04333; C04420	C12H20O10	-0.0198224	0.987896	-0.0341511	0.839779	0.00570129	0.991867	-0.119675	0.213721	0.127836	0.151132	0.113838	0.143657	0.0468222	0.999213	-
673	323.155	19571.4	0.295706	Citalopram	C07572	C20H21FN2O	-0.0674997	0.986291	0.0412721	0.814737	-0.206951	0.252674	-0.210971	0.107454	-0.302233	0.130666	-0.187727	0.0358699	0.101528	0.981279	-
674	323.982	3024.96	-0.335472	Thiadiazolidinone; Triazolidinonethione	C10973; C10975	C12H12BrN3OS	-0.0189058	0.987896	-0.422039	0.00479985	0.0955913	0.0691493	0.118553	0.0659569	0.383263	0.0081997	0.217616	0.0172621	0.0377072	0.999213	-
675	325.117	8222.3	NA	Cyclo(L-tyrosyl-L-tyrosyl)	C20516	C18H18N2O4	0.241682	0.212151	0.0631741	0.727228	-0.360773	0.0278071	-0.434409	0.0206626	0.173133	0.0652923	0.00846772	0.934461	0.206199	0.716659	-
676	325.125	4124.99	0.369103	2,2,4-Trimethyl-3-(4-fluorophenyl)-2H-1-benzopyran-7-ol acetate	C15056	C20H19FO3	0.0332857	0.987896	0.0269505	0.92503	-1.05949	0.0021415	-1.12552	0.00423005	-0.0994177	0.481303	-0.258009	0.0245361	0.0563175	0.999213	-
677	325.201	10982.2	0.509727	2,3-Dinor-8-iso prostaglandin F2alpha	C14794	C18H30O5	0.00634196	0.994449	0.0740914	0.727459	0.0107004	0.990066	-0.269729	0.0987249	-0.0313446	0.864189	-0.15362	0.139414	-0.038638	0.999213	-
678	325.275	4159.87	0.782183	2-Oxophytanate	C02117	C20H38O3	0.000296211	0.999369	0.11149	0.678825	0.0488654	0.889971	-0.313171	0.0129764	-0.167311	0.448207	-0.0225246	0.890845	0.0754219	0.999213	-
679	327.094	25252.5	0.557762	7-Hydroxy-6-methyl-8-ribityl lumazine	C05995	C12H16N4O7	0.0377314	0.987896	0.0791888	0.71702	0.044536	0.938197	-0.131418	0.160942	0.0905382	0.56576	0.0841665	0.457118	0.103469	0.995142	-
680	327.111	48241.2	-0.068727	Anisatin; Paeonoside	C09294; C10717	C15H20O8	0.056989	0.947611	0.0476039	0.767325	-0.0769969	0.864519	-0.0602602	0.601763	0.0499747	0.715971	-0.068044	0.342138	0.020012	0.999213	x
681	327.217	3.21683e+06	0.441024	2,3-Dinor-8-iso prostaglandin F1alpha	C14795	C18H32O5	-0.0476752	0.984399	0.0424235	0.828633	0.0166795	0.990066	-0.286409	0.0903411	0.165553	0.0834725	0.141901	0.302014	0.061319	0.999213	-
682	327.234	205421	0.720391	(4Z,7Z,10Z,13Z,16Z,19Z)-Docosahexaenoic acid; 6alpha-Methylprogesterone; 2a...	C06429; C14586; C15116; C15265; C15299	C22H32O2	-0.206598	0.607269	0.0207432	0.945168	-0.106359	0.890624	-0.341623	0.0522963	0.168155	0.147533	0.149369	0.264969	0.0689624	0.999213	-
683	328.046	58854.3	0.578091	Mecarbam; 3',5'-Cyclic AMP; 2',3'-Cyclic AMP; 3',5'-Cyclic dGMP	C00575; C02353; C02507; C18661	C10H12N5O6P; C10H20NO5PS2	-0.0278276	0.987896	0.0278599	0.893269	-0.0878679	0.858082	-0.970025	0.00153516	-0.593424	0.00184646	-0.869598	1.72092e-05	-0.0364101	0.999213	-
684	328.108	13016.3	-0.328834	2,2'-(1-Phenyl-1H-1,2,4-triazole-3,5-diyl)bis-phenol	C11569	C20H15N3O2	-0.087239	0.775311	0.0147598	0.965418	-0.350848	0.304423	-1.42352	0.00182272	-2.54357	0.000599931	-2.66904	6.66703e-05	0.0299641	0.999213	-
685	328.151	5213.33	0.679287	Valclavam	C06668	C14H23N3O6	-0.0357915	0.987896	0.0628676	0.810939	-0.00231263	0.996123	-0.792508	0.00754829	0.0119705	0.957817	-0.170269	0.188732	0.0154732	0.999213	-
686	328.171	6758.83	0.701282	Trifenmorph	C19144	C23H23NO	0.188941	0.680819	0.0248194	0.919434	-0.0815882	0.899491	-0.280516	0.0784923	0.0166286	0.952605	-0.0247011	0.874755	0.0585851	0.999213	-
687	329.105	6164.05	NA	Halofenozide	C18791	C18H19ClN2O2	0.00363519	0.994449	-0.0297976	0.909668	-0.0231129	0.97548	-0.287892	0.102494	-0.537591	0.00413161	-0.87188	0.00026223	-0.0316907	0.999213	-
688	329.133	25080.7	0.0426366	Pyributicarb	C18422	C18H22N2O2S	0.0814192	0.787754	-0.00689036	0.972749	-0.010667	0.993506	-0.109824	0.375668	-0.0440887	0.839977	-0.189234	0.0357172	0.223578	0.212895	-
689	329.16	14290.7	0.575722	8-Epiiridodial glucoside; Iridodial glucoside; Picrocrocin; Schizonepetosid...	C11656; C11670; C17055; C17634; C17635; C17636; C17637	C16H26O7	0.0642205	0.927816	-0.0228005	0.94337	-0.078407	0.912889	-0.21861	0.197491	-0.141159	0.299376	-0.0488994	0.742084	-0.0222631	0.999213	-
690	329.233	35796.9	0.616858	9,12,13-TriHOME; 9,10,13-TriHOME; 9,10-Dihydroxy-12,13-epoxyoctadecanoate	C14833; C14835; C14837	C18H34O5	0.0391336	0.987896	0.0898152	0.68126	0.0339834	0.970754	-0.0785328	0.602675	0.124862	0.181438	0.126713	0.298932	0.143729	0.999213	-
691	330.062	74797.8	0.603367	dAMP	C00360	C10H14N5O6P	0.0112596	0.994449	-0.101952	0.627516	-0.0733431	0.858819	0.0416232	0.58676	0.179826	0.455536	-0.0897903	0.438415	-0.0141378	0.999213	-
692	330.074	288710	0.664826	Malvidin	C08716	C17H15O7	-0.0630899	0.960224	0.10357	0.640713	-0.160702	0.499057	-0.0180509	0.861414	-0.0319819	0.86802	-0.0306554	0.7755	0.0120243	0.999213	-
693	330.107	6473.12	NA	Nizatidine	C07270	C12H21N5O2S2	-0.0814504	0.802024	0.0375698	0.876508	-0.0424246	0.951998	-0.216787	0.108995	-0.19264	0.0834995	-0.0728006	0.206083	0.0375239	0.999213	-
694	330.186	3489.5	0.512587	Mahanimbine	C09220	C23H25NO	0.0364298	0.987896	-0.130116	0.660057	-0.216801	0.704301	-0.179785	0.305228	0.210734	0.0790393	0.143296	0.207409	0.00162605	0.999213	-
695	331.021	6800.94	NA	PQQH2	C01359	C14H8N2O8	0.163399	0.695979	0.00529457	0.967455	0.0429258	0.338836	0.331849	0.00153516	0.169467	0.147236	-0.0205605	0.909711	-0.0795788	0.999213	-
696	331.046	10434.5	0.450027	Corniculatusin; Patuletin; Laricitrin	C04527; C10118; C12633	C16H12O8	-0.0582003	0.987896	0.202003	0.121687	0.0956221	0.788523	3.03335	0.000316828	0.0266769	0.893086	0.0590163	0.539883	-0.107148	0.839692	-
697	331.091	23028.3	NA	Butamifos; O-Ethyl-O-(5-methyl-4-nitrophenyl)(1-methylpropyl)phosphoramidot...	C11022; C11023	C13H21N2O4PS	-0.0690941	0.634019	0.052913	0.762168	0.0474732	0.94594	0.0485783	0.69781	0.0215411	0.913571	0.042894	0.537255	-0.0169041	0.999213	-
698	331.126	5254.01	0.812995	Zanamivir	C08095	C12H20N4O7	-0.00386416	0.994449	0.0378651	0.86017	-0.0389788	0.951998	-0.125702	0.267649	0.0727166	0.632729	0.24071	0.0154423	-0.0859979	0.968078	-
699	331.249	3541.44	0.669561	9,10,18-Trihydroxystearate	C19621	C18H36O5	0.0617909	0.987896	1.01062	0.000543443	0.0238342	0.973073	2.71767	0.000419465	0.0989706	0.68038	0.12966	0.364865	0.111352	0.999213	-
700	332.013	3085.61	NA	Glucocapparin	C08404	C8H15NO9S2	-0.156359	0.624394	0.129693	0.294859	0.0146962	0.963961	0.175554	0.00531358	-0.0142139	0.951994	0.105646	0.352102	-0.208986	0.759447	-
701	332.093	2543.77	0.642791	Dihydrosanguinarine; Norchelerythrine	C05191; C12226	C20H15NO4	0.0300003	0.987896	0.0529956	0.817588	-0.0326138	0.963961	-0.336471	0.0057182	0.00559668	0.979639	-0.0200667	0.870105	0.0807632	0.999213	-
702	332.159	5679.87	NA	Primidolol	C11774	C17H23N3O4	-0.00285681	0.994449	0.0115541	0.960101	-0.155778	0.682056	-0.292641	0.048712	-0.0199035	0.94369	0.0855671	0.469792	0.031467	0.999213	-
703	332.164	14736.8	0.687643	(alphaS,betaS)-alpha-Ethyl-alpha-(4-methoxyphenyl)-beta-phenyl-2-pyridineet...	C15458	C22H23NO2	0.178974	0.986291	0.000382797	0.99913	-0.252984	0.406289	-0.236674	0.102183	-0.0826873	0.867926	-0.17484	0.720333	0.378115	0.999213	-
704	333.059	4976.43	0.74236	sn-Glycero-3-phospho-1-inositol; 2-(alpha-D-Galactosyl)-sn-glycerol 3-phosp...	C01225; C04641; C04703; C10517	C9H19O11P	-0.48573	0.00324539	0.117424	0.591009	-0.0211898	0.975402	0.0369576	0.73593	0.0572268	0.587273	0.014444	0.876865	0.0379231	0.999213	-
705	333.094	18280.2	0.206955	Aramite	C19019	C15H23ClO4S	0.00410586	0.994449	-0.539895	0.0266719	0.269116	0.636691	1.38557	0.0028161	-0.975321	0.00106075	-0.988807	0.00029292	-0.0307694	0.999213	-
706	333.206	6247.28	0.701012	12-Keto-leukotriene B4; Prostaglandin A2; Prostaglandin B2; Prostaglandin C...	C05949; C05953; C05954; C05955; C05957; C05958; C09125; C09150; C11876; C14504; C14815; C14913; C15159; C18173	C20H30O4	0.0104875	0.994449	0.0211233	0.93316	-0.0879082	0.82039	-0.264147	0.065922	0.0351238	0.886483	0.160435	0.310778	1.34002	0.999213	-
707	334.125	5253.32	0.683844	N4-(Acetyl-beta-D-glucosaminyl)asparagine	C04540	C12H21N3O8	-0.0207218	0.987896	0.0923445	0.613223	-0.168368	0.579621	-0.195754	0.0723819	-0.974679	0.00128086	-1.10516	3.2034e-06	0.0586536	0.999213	-
708	335.039	4139.28	0.224861	Nicotinate D-ribonucleotide	C01185	C11H15NO9P	0.0261463	0.987896	0.0895857	0.215034	-0.0122709	0.964335	-0.190876	0.0331895	-0.163169	0.33389	-0.0211567	0.864704	-0.0465963	0.999213	-
709	335.093	51888.3	NA	Psoralidin; Sojagol	C10523; C10529	C20H16O5	-0.103285	0.789956	-0.152885	0.559245	-0.0172187	0.990066	-0.316425	0.0985561	-0.285691	0.0591346	-0.674922	0.000160794	0.0485664	0.999213	-
710	335.222	9126.11	0.716097	Prostaglandin B1; Leukotriene B4; (13E)-(15S)-15-Hydroxy-9-oxoprosta-10,13-...	C00959; C02165; C04685; C04686; C04822; C04849; C05356; C05965; C05966; C09087; C09175; C14781; C14808; C14810; C14812; C14813; C14820; C14821; C14823	C20H32O4	0.0255678	0.987896	0.00885899	0.953259	-0.420005	0.817383	-0.190553	0.137755	0.0840067	0.795108	0.0907994	0.471035	0.0827027	0.999213	-
711	336.063	891927	0.463216	5-Hydroxymethyldeoxycytidylate	C03997	C10H16N3O8P	-0.0066658	0.994449	-0.0633505	0.583612	-0.0521893	0.899491	-0.100066	0.153668	0.104496	0.59075	0.0512489	0.572516	-0.00164785	0.999213	-
712	336.136	55954.9	0.8011	Talampanel	C13670	C19H19N3O3	0.0281368	0.990627	0.0346987	0.836781	-0.0744928	0.81615	-0.311956	0.00535449	0.0375933	0.864855	0.0728168	0.349343	-0.0526182	0.999213	-
713	336.167	12097.3	0.706841	Kyotorphin	C02993	C15H23N5O4	-0.0614406	0.987896	0.016459	0.909668	-0.963766	0.000626231	-0.67997	0.000519162	0.358121	0.0140553	0.154898	0.273511	-0.0481977	0.999213	-
714	337.078	6120.35	0.121612	L-Ascorbic acid-2-glucoside	C18339	C12H18O11	-0.0134301	0.991193	0.112574	0.66934	0.0062854	0.9944	-0.118342	0.381165	-0.0280209	0.920546	-0.119904	0.108297	0.0087134	0.999213	-
715	337.119	3545.25	NA	Alamarine	C09326	C19H18N2O4	0.0308293	0.987896	0.0804028	0.602529	-0.0259276	0.963961	-0.143175	0.113137	-0.05055	0.823623	0.00661193	0.956176	-0.00133082	0.999213	-
716	337.202	3194.35	0.768186	Shiromodiol diacetate; Piperonyl butoxide; Monacolin J acid	C09725; C18880; C20854	C19H30O5	0.137876	0.602583	-0.00977439	0.965418	-0.0815022	0.890624	-0.114466	0.254326	0.276083	0.0580182	-0.0266572	0.893459	-0.0491283	0.999213	-
717	337.238	2761.89	0.751544	Aphidicolin; Zoapatanol; 5,6-DHET; 8,9-DHET; 11,12-DHET; 14,15-DHET	C06088; C09205; C14772; C14773; C14774; C14775	C20H34O4	0.0221556	0.987896	-0.06208	0.612058	-0.0584598	0.921365	-0.229458	0.0723819	-0.00729302	0.981783	-0.0133298	0.9647	0.0976059	0.999213	-
718	337.311	224207	0.701062	Erucic acid	C08316	C22H42O2	-0.0302211	0.987896	-0.0106048	0.967455	0.0607873	0.89585	-0.291293	0.0565488	0.217791	0.356122	-0.0785066	0.714677	-0.0408164	0.999213	-
719	337.985	4742.23	0.766058	N,6-O-Disulfo-D-glucosamine	C03789	C6H13NO11S2	0.0577405	0.987896	0.0530259	0.833197	0.109572	0.7858	0.0798937	0.623515	-0.0101362	0.970439	0.117245	0.327681	0.0403751	0.999213	-
720	338.051	4636.1	0.599746	S-Sulfanylglutathione	C17267	C10H17N3O6S2	0.203248	0.611987	-0.0185518	0.919434	0.0800331	0.648458	0.235909	0.0304107	0.179203	0.442427	-0.00195952	0.998054	-0.0295606	0.999213	-
721	338.139	48682.6	0.867677	(S)-Canadine; Papaverine; Eschscholtzidine; Evoprenine; (R)-Canadine; Dicen...	C03329; C06533; C09426; C10666; C11818; C17426; C17898; C19985	C20H21NO4	0.0454907	0.987896	0.0425276	0.712455	-0.0695738	0.730455	-0.252466	0.0136611	0.165809	0.262002	0.0733601	0.599357	0.0585666	0.999213	-
722	338.172	6459.54	0.666779	Xamoterol	C11775	C16H25N3O5	-0.080824	0.903576	0.0557491	0.817588	-0.0659424	0.931569	-0.424565	0.0191125	-0.187293	0.337343	-0.0264129	0.853307	-0.0146576	0.999213	-
723	338.989	28205.2	0.391737	D-Fructose 1,6-bisphosphate; beta-D-Fructose 2,6-bisphosphate; 1D-myo-Inosi...	C00354; C00665; C01220; C01231; C03693; C03785; C04062; C04063; C04064; C05378	C6H14O12P2	0.105739	0.603221	0.0131495	0.945168	0.758367	0.00171759	1.3553	4.59593e-05	0.163983	0.205301	0.145364	0.106187	0.00897761	0.999213	-
724	339.051	3554.9	-0.259483	Versicolorin B	C20575	C18H12O7	0.02454	0.987896	-0.00947375	0.954952	-0.0254477	0.904272	-0.0412642	0.353825	-0.0555359	0.71044	-0.020692	0.803324	-0.00842764	0.999213	-
725	339.066	33535.2	-0.302431	Asparenomycin A	C17400	C14H16N2O6S	-0.00165651	0.994449	-0.0472094	0.813113	-0.152923	0.545299	-0.00316004	0.975812	0.0985082	0.531019	0.0476394	0.607665	-0.00790351	0.999213	-
726	339.327	6558.95	0.552814	Docosanoic acid	C08281	C22H44O2	-0.0175172	0.991723	0.133702	0.412186	-0.00175292	0.995251	-0.183526	0.00370439	-0.107961	0.639625	-0.129777	0.119523	-0.141704	0.744401	x
727	341.018	3565.57	0.0932111	5-Fluorouridine monophosphate	C16634	C9H12FN2O9P	0.0273565	0.987896	-0.153044	0.0363672	-0.137656	0.447621	-0.0635182	0.62544	0.0663598	0.605068	0.089554	0.197199	-0.0525792	0.999213	-
728	341.088	18864.4	0.142063	Caffeic acid 3-glucoside; 1-Caffeoyl-beta-D-glucose	C10431; C10433	C15H18O9	-0.00546449	0.994449	-0.0464904	0.711664	-0.0998418	0.625059	-1.58269	0.000146335	-0.167336	0.332872	-0.261936	0.00131318	0.00695166	0.999213	-
729	341.109	183727	0.742674	Sucrose; Cellobiose; Maltose; Lactose; Isomaltose; alpha-Maltose; alpha,alp...	C00089; C00185; C00208; C00243; C00252; C00897; C01083; C01235; C01518; C01711; C01725; C01728; C01742; C01970; C01971; C02048; C02964; C03857; C04147; C04219; C05400; C05402; C06421; C06422; C07064; C08240; C08250; C15548; C18068; C19632; C19633; C19634; C19636; C19773; C20236	C12H22O11	0.0241455	0.987896	-0.0673195	0.358897	-0.0171934	0.951998	-2.96231	3.39296e-06	-0.359254	0.0127049	-0.198843	0.0140854	0.00418921	0.999213	-
730	342.077	4341.6	NA	Coenzyme B	C04628	C11H22NO7PS	0.0102707	0.994449	0.0309328	0.906562	0.0487503	0.914736	-0.583076	0.000184011	0.0982927	0.639625	0.0438451	0.591212	-0.126975	0.798271	-
731	342.186	8054.33	0.748679	N,N-Didesmethyltamoxifen	C16548	C24H25NO	-0.0947874	0.775311	0.0245372	0.922851	-0.0835906	0.899491	-0.294736	0.053145	0.0778468	0.350089	0.1	1	0.0638549	0.999213	-
732	343.046	9966.61	0.246253	3,4,3'-Tri-O-methylellagic acid; Aflatoxin-M1-8,9-epoxide	C10836; C19594	C17H12O8	0.0511443	0.987896	-0.0634423	0.314058	-0.0845923	0.397328	-0.0406702	0.484121	-0.0046328	0.979639	0.0452969	0.740228	0.115741	0.901075	-
733	343.067	5808.58	-0.0387639	Bluensidine 6-phosphate; Theogallin	C10834; C17572	C14H16O10; C8H17N4O9P	0.50699	0.0347899	-0.168002	0.405037	-0.118393	0.674896	-0.327211	0.000484422	0.124398	0.354875	0.614075	9.57121e-05	1.02864	0.00892971	-
734	344.04	7354.55	0.558886	3',5'-Cyclic GMP; 2',3'-Cyclic GMP; 3'-Keto-3'-deoxy-AMP; Adenosine 5'-phos...	C00942; C06194; C07025; C18344	C10H12N5O7P; C10H12N5O7P.	0.0156191	0.987896	0.0589106	0.727228	-0.0256699	0.963961	-0.813067	0.00118162	-0.472089	0.00138151	-0.0889511	0.0829079	-0.0453309	0.999213	-
735	344.101	6897.69	0.277981	2-Descarboxy-betanidin	C17757	C17H17N2O6	0.0664414	0.904672	-0.0123809	0.960101	-0.0907343	0.899491	-0.676679	0.00354737	-0.430579	0.0175324	-0.371629	0.00613522	0.00854833	0.999213	-
736	344.162	6004.95	0.70367	Pefurazoate	C18480	C18H23N3O4	-0.0457117	0.987896	-0.0189984	0.946073	-0.180984	0.661905	-0.292572	0.0601938	-0.479462	0.0591346	-0.557426	0.00139273	0.145922	0.884963	-
737	345.061	2517.3	0.424734	Tomentin; Taxifolin 3-O-acetate; Axillarin; Syringetin; Eupatolitin; Aflato...	C04581; C09967; C10021; C11620; C17788; C19588; C19589	C17H14O8	-0.00383595	0.994449	0.0972136	0.447867	-0.0527116	0.92123	2.09973	0.000940636	0.0085415	0.96493	0.0233389	0.86124	0.0442692	0.999213	x
738	346.056	8390.42	0.898783	AMP; dGMP; Adenosine 2'-phosphate; 3'-AMP; 7-alpha-D-Ribosyladenine 5'-phos...	C00020; C00362; C00946; C01367; C04378; C19970	C10H14N5O7P	0.155218	0.634019	-1.54825	0.000687208	-1.39163	0.000196899	-1.71607	0.000310881	0.30915	0.0488903	-0.456848	0.000165966	0.147992	0.710024	-
739	347.1	8277.68	0.275955	Musca-aurin-VII	C08562	C15H16N4O6	-0.000415104	0.999369	0.0519672	0.755682	-0.212653	0.296276	0.0215767	0.747925	-0.0140894	0.951994	-0.0534467	0.258104	-0.101797	0.246888	-
740	347.162	11059.7	0.78807	Funebrine; Enalaprilate	C10145; C11720	C18H24N2O5	0.0397259	0.987896	0.0366281	0.866182	-0.178449	0.601362	-0.266723	0.0531859	0.180255	0.153611	0.137546	0.338836	0.0695043	0.999213	-
741	348.123	10079	NA	2-(Biaryl)carbapenems	C12019	C21H19NO4	0.0816568	0.868757	-0.0426315	0.804076	-0.0595802	0.899491	-0.208604	0.093448	0.0112295	0.951994	-0.357456	0.018454	-0.000102395	0.99945	-
742	349.061	16631.7	0.484765	Sulfometuron	C18895	C14H14N4O5S	0.0231971	0.987896	-0.0617282	0.730554	-0.176353	0.366218	-0.136264	0.0872157	0.012275	0.962535	-0.0656673	0.496424	-0.0816378	0.999213	-
743	349.095	41315.5	0.0895742	6-[2,3-Dihydroxy-1-(hydroxymethyl)propyl]-1,2-dihydro-7-hydroxy-9-methoxy-c...	C19590	C17H18O8	0.0365505	0.987896	-0.0382921	0.875278	-0.0780583	0.916066	-0.235158	0.19849	-0.0743717	0.56576	-0.511997	0.00387302	-0.0802236	0.999213	-
744	350.112	6728.38	0.274575	N-Acetyldemethylphosphinothricin tripeptide	C17950	C12H22N3O7P	-0.0118705	0.994449	0.0794345	0.767325	-0.100494	0.867753	-0.348413	0.0379686	-0.0143787	0.942667	-0.334355	0.0052831	-0.0582865	0.999213	-
745	350.153	25898.9	0.774908	Aniflorine	C10635	C20H21N3O3	0.108661	0.987896	0.00873738	0.965418	-0.13357	0.593646	-0.221052	0.00645053	0.404885	0.0558788	-0.0151622	0.947361	0.0290482	0.999213	-
746	351.035	4385.83	0.676871	4-[2-(5-Carboxy-2-hydroxy-3-methoxyphenyl)-2-oxoethylidene]-2-hydroxy-2-pen...	C18349	C15H12O10	-0.0154992	0.987896	-0.0201827	0.867285	-0.0261269	0.89585	0.0317438	0.633669	-0.0706059	0.528451	-0.0248907	0.808731	-0.033419	0.999213	-
747	351.057	5774.68	0.511589	4-(4-Deoxy-beta-D-gluc-4-enuronosyl)-D-galacturonate; 4-(4-Deoxy-alpha-D-gl...	C04733; C06118	C12H16O12	0.0346631	0.987896	-0.322984	0.00285136	-0.438138	0.00108488	-0.44554	0.0024156	0.0646784	0.795108	-0.0806449	0.27373	0.12547	0.744401	-
748	351.095	37084.4	0.0111836	Hexythiazox	C18467	C17H21ClN2O2S	-0.0173638	0.987896	0.0662018	0.710455	-0.0961388	0.848471	-0.100674	0.285946	-0.283265	0.0988024	-0.627504	0.000384267	-0.0598308	0.999213	-
749	351.109	3916.13	NA	Berberastine	C09360	C20H18NO5	-0.0401233	0.987896	0.181618	0.57803	-0.173913	0.7348	-0.582992	0.0329448	-0.119598	0.56576	-0.385122	0.0151967	-0.115916	0.762672	-
750	351.217	6950.18	0.487817	Prostaglandin H2; Prostaglandin E2; Prostaglandin D2; Prostaglandin I2; Thr...	C00427; C00584; C00696; C01312; C02198; C04654; C04671; C04853; C05960; C06314; C06315; C06476; C11997; C13807; C13808; C17652; C17656	C20H32O5	-0.0411197	0.987896	-0.00789691	0.941891	0.0219766	0.844062	-0.069793	0.315851	-0.158203	0.482617	0.0825393	0.606607	0.0150978	0.999213	-
751	352.067	8008.71	0.666841	2,5-Diamino-6-(5-phospho-D-ribosylamino)pyrimidin-4(3H)-one	C01304	C9H16N5O8P	0.0687435	0.987896	-0.0734927	0.736391	-0.121357	0.841685	-0.0575159	0.527564	-0.0262654	0.909414	0.0292574	0.740228	0.00325535	0.999213	-
752	352.118	9077.73	NA	Piperophos	C18758	C14H28NO3PS2	-0.0614773	0.959728	0.0959391	0.612058	-0.117655	0.797858	-0.0394564	0.653949	-0.197371	0.31762	-0.405151	0.000424545	-0.0889916	0.999213	-
753	352.163	37340.9	0.682239	Dihydrozeatin riboside	C16447	C15H23N5O5	0.102692	0.775311	0.028824	0.894146	-0.157657	0.5858	-0.209844	0.0415114	0.144859	0.31762	0.0702301	0.483226	-0.0251334	0.999213	-
754	353.05	5923	0.566747	5-Amino-6-(5'-phosphoribosylamino)uracil	C01268	C9H15N4O9P	-0.099319	0.751845	0.0358961	0.828633	-0.056821	0.843826	-0.144938	0.0375316	0.00514006	0.985114	0.101287	0.402598	-0.0411017	0.999213	-
755	353.124	4400.29	0.54134	Fusarenone X	C19583	C17H22O8	0.0186791	0.991193	0.0519239	0.810939	-0.0527714	0.930851	-0.177238	0.028713	0.0213032	0.944245	0.0342833	0.435552	0.0299532	0.999213	-
756	354.001	14542.6	0.559854	2-Amino-7,8-dihydro-4-hydroxy-6-(diphosphooxymethyl)pteridine	C04807	C7H11N5O8P2	0.00127935	0.994449	0.0723659	0.71702	0.132489	0.79232	0.253575	0.0586931	-0.0230786	0.934786	0.159888	0.220625	0.021405	0.999213	-
757	354.149	44293.7	0.804475	S-Adenosylmethioninamine	C01137	C14H23N6O3S	-0.0425536	0.987896	-0.0279474	0.875278	-0.106268	0.797858	-0.250031	0.0383408	-0.0639934	0.836313	0.0993881	0.287351	0.0392604	0.999213	-
758	355.068	9556.31	0.6471	5-Amino-6-(5'-phospho-D-ribitylamino)uracil	C04454	C9H17N4O9P	-0.145051	0.784037	0.0639485	0.814737	-0.0361495	0.951998	0.10493	0.315169	-0.0146774	0.941388	-0.0693269	0.550207	-0.095097	0.884963	-
759	355.149	5222.72	-0.284607	Hycanthone mesylate	C19432	C20H24N2O2S.	-0.0686565	0.845501	-0.11156	0.685935	-0.0762919	0.884313	-0.259985	0.0890847	0.141454	0.229351	0.0738553	0.352102	0.0488466	0.999213	-
760	355.178	5370.59	0.627096	1alpha,5alpha-Dimercaptoandrostane-3alpha,17beta-diol	C14960	C19H32O2S2	0.0277813	0.987896	0.0284888	0.860092	-0.0312817	0.963961	-0.312969	0.0146586	-0.146911	0.245022	-0.0722049	0.594779	-0.0247288	0.999213	-
761	356.1	14226.4	0.456573	cyclo-Dopa 5-O-glucoside	C17751	C15H19NO9	0.0558528	0.987896	0.149697	0.338733	0.0169311	0.97548	-0.322086	0.00525462	-0.0508351	0.84352	-0.201755	0.157953	-0.0225149	0.999213	-
762	356.136	152078	0.467441	Bakankoside	C09914	C16H23NO8	0.0412444	0.987896	-0.0348423	0.824549	-0.124068	0.605243	-0.377302	0.00190093	-0.12555	0.639625	0.0136041	0.916948	-0.0479848	0.999213	-
763	356.201	23256.1	0.752454	N-Desmethyltamoxifen	C16546	C25H27NO	-0.0474843	0.987896	0.0180006	0.946073	-0.0766892	0.912152	-0.284203	0.0555581	-0.0692226	0.769546	-0.429107	0.0154423	0.025062	0.999213	-
764	356.255	8062.64	0.444055	Leucyl-leucyl-norleucine	C11328	C18H35N3O4	0.0015712	0.995621	-0.135987	0.671661	-1.0197	0.00672522	-0.321546	0.171167	0.0630997	0.717093	0.047204	0.834108	-0.0406921	0.999213	-
765	357.048	2859.89	0.397579	L791456	C11718	C18H15ClN2O2S	-0.0431607	0.987896	-0.0295373	0.823934	-0.024079	0.963961	-0.23417	0.0201003	0.0245507	0.933153	0.0182005	0.888413	-0.0781012	0.999213	-
766	358.109	4134.26	0.594732	Isopenicillin N; Penicillin N; Crinasiatine	C05557; C06564; C10584	C14H21N3O6S; C22H17NO4	0.00750206	0.994449	0.0163802	0.953259	-0.047219	0.941921	-0.0942938	0.375258	0.0677526	0.759223	0.312222	0.0044741	-0.0797599	0.999213	x
767	359.038	2169.87	NA	Pyraclofos	C18406	C14H18ClN2O3PS	-0.06656	0.987896	-0.0838772	0.389289	0.07566	0.47703	-0.114001	0.0920507	0.0266291	0.926665	0.0952096	0.396505	-0.0789887	0.999213	-
768	359.075	5713.61	0.180512	Nitrovin	C19487	C14H12N6O6	-0.109825	0.46575	-0.0479235	0.839779	0.0490954	0.943585	-0.100322	0.562354	0.124211	0.389436	-0.130805	0.157953	-0.0873566	0.999213	x
769	359.123	155729	0.805651	Theobromine, calcium salt	C19601	(C7H8N4O2)2.	0.0027527	0.994449	0.038288	0.86017	-0.0600691	0.912889	-0.191997	0.107454	-0.119541	0.400414	-0.0285495	0.711595	0.000731758	0.999213	-
770	361.137	13387.3	0.825867	Clavamycin B; Clavamycin C	C17362; C17363	C13H22N4O8	-0.0501331	0.927816	0.0449843	0.860092	-0.0457811	0.94594	-0.339553	0.0220353	-0.50851	0.0214178	-0.579009	0.000246005	-0.0232901	0.999213	-
771	362.051	10803	0.907741	GMP; Guanosine 3'-phosphate; Precursor Z; 8-Oxo-dGMP	C00144; C06193; C18239; C19968	C10H14N5O8P	0.126339	0.536533	-0.501457	0.00225564	-0.436255	0.0121515	-0.783097	0.000891109	0.400314	0.0267333	0.103213	0.143657	0.0884268	0.999213	-
772	362.14	163615	0.837427	delta-(L-2-Aminoadipyl)-L-cysteinyl-D-valine	C05556	C14H25N3O6S	0.0400142	0.987896	0.0302479	0.906562	-0.124339	0.72641	-0.218469	0.0268107	-0.0219271	0.94369	0.0218153	0.923715	0.150894	0.879223	-
773	363.035	12044.6	0.206902	Xanthosine 5'-phosphate	C00655	C10H13N4O9P	-0.0196113	0.990627	-0.0406731	0.711274	-0.186047	0.0492242	-0.18518	0.00153645	0.0692827	0.818822	0.0585088	0.334916	0.104104	0.954337	-
774	363.131	15328.7	-0.438703	Pyridaben	C18614	C19H25ClN2OS	-0.0240558	0.987896	-0.0188041	0.919434	-0.117158	0.733593	-0.167563	0.16027	-0.228662	0.0456059	-1.60905	0.000190115	-0.0612596	0.999213	-
775	364.084	7832.94	NA	6-Methylpretetramide	C06629	C20H15NO6	0.15627	0.787754	-0.413458	0.0328467	-0.176725	0.5858	-0.261883	0.0422984	0.139635	0.657754	-0.135866	0.20104	-0.170725	0.884963	-
776	365.05	6964.93	0.230506	1-(5'-Phosphoribosyl)-5-formamido-4-imidazolecarboxamide	C04734	C10H15N4O9P	0.00782698	0.994449	-0.534466	0.08249	-0.234671	0.353524	-0.695848	7.18738e-07	0.0534205	0.846918	0.0279798	0.669595	-0.0614223	0.999213	-
777	366.156	3969.28	0.875471	Isatidine	C10333	C18H25NO7	-0.0182181	0.987896	0.00100361	0.996863	-0.125485	0.638287	-0.316396	0.00738878	0.105628	0.556901	-0.0413221	0.713671	0.0963701	0.95882	-
778	367.018	6649.21	-0.869962	Orotidine 5'-phosphate	C01103	C10H13N2O11P	0.0942571	0.690898	-0.0403619	0.810939	0.0159221	0.970958	-0.107395	0.427739	-0.182128	0.345901	0.0287069	0.809598	0.0204243	0.999213	-
779	367.159	11447.3	0.731081	Dehydroepiandrosterone sulfate	C04555	C19H28O5S	0.104456	0.789956	0.0155219	0.953259	-0.238028	0.464824	-0.461229	0.00993543	-0.084059	0.555652	-0.148417	0.180726	0.0875362	0.999213	-
780	367.215	20223.9	0.61902	Propantheline; Propantheline chloride	C07506; C11762	C23H30NO3; C23H30NO3.	0.21735	0.833862	-0.020792	0.949046	-0.33817	0.135102	-0.333168	0.0558372	-0.0485335	0.735983	-0.32893	0.00389224	0.00619206	0.999213	-
781	367.358	46607.3	0.452656	Tetracosanoic acid	C08320	C24H48O2	0.0387288	0.987896	0.0900614	0.612058	0.0574878	0.411322	-0.190165	0.00607726	-0.177107	0.366042	-0.159422	0.00970894	-0.179072	0.607121	-
782	369.083	250656	0.65037	Fraxin	C09266	C16H18O10	0.0471318	0.987896	-0.00145404	0.997576	0.0217838	0.973073	-0.127847	0.393478	-0.0974995	0.491855	-0.0881093	0.521145	0.0311951	0.999213	-
783	369.301	1.35475e+06	-0.217401	Di(2-ethylhexyl) adipate; Docosanedioate	C14240; C19625	C22H42O4	0.0500596	0.987896	0.0876141	0.583612	-0.0398756	0.882486	-0.110502	0.368451	-0.184554	0.168934	-0.0361812	0.659862	-0.03499	0.999213	-
784	371.062	18263.8	0.0419026	2-O-Caffeoylglucarate	C03062	C15H16O11	-0.0339351	0.987896	0.0129591	0.960101	-0.0100981	0.990066	-0.123283	0.22508	-0.0602461	0.84352	-0.00734506	0.948936	0.0408675	0.999213	-
785	371.158	3475.56	0.82817	Clavamycin F	C17395	C15H24N4O7	0.0278426	0.987896	0.0698291	0.726991	-0.0436343	0.94594	-0.197062	0.0774561	0.0631454	0.671949	-0.195652	0.105945	-0.0025944	0.999213	-
786	371.176	16255.5	0.66061	Biocytin	C05552	C16H28N4O4S	-0.0335219	0.987896	0.0417045	0.840272	-0.0119252	0.990198	-0.234792	0.0744147	0.177275	0.0656986	0.130065	0.184107	0.0596642	0.999213	-
787	371.194	11553.5	0.781704	(Ac)2-L-Lys-D-Ala-D-Ala	C03326	C16H28N4O6	-0.00476067	0.994449	0.0375967	0.875278	-0.0493733	0.94594	-0.209477	0.123511	-0.00258465	0.985114	-0.399385	0.000905677	0.0094599	0.999213	-
788	372.088	8738.02	0.507219	Deacetylcephalosporin C	C03112	C14H19N3O7S	0.000579066	0.999369	-0.272202	0.154651	-0.290369	0.16425	-0.0593726	0.598035	-0.12427	0.597662	-0.0526078	0.392398	-0.00284832	0.999213	-
789	374.127	17386.7	-0.574111	Tiagabine	C07503	C20H25NO2S2	-0.0964486	0.857253	-0.00752234	0.967584	-0.0902698	0.89585	0.20929	0.130225	0.198314	0.115412	0.104645	0.334916	-0.00743617	0.999213	-
790	376.119	40709.7	0.778392	6-(2-Hydroxyethyl)-5,6-dihydrosanguinarine	C12198	C22H19NO5	-0.103647	0.747047	0.0515673	0.782345	-0.046169	0.938197	-0.148257	0.108161	0.13348	0.160153	-0.0630389	0.64085	0.0248321	0.999213	-
791	377.125	13383.4	0.223516	Hydroxyvernolide	C09477	C19H22O8	0.033418	0.987896	-0.0379073	0.927897	0.150496	0.89585	-0.996384	0.0136611	0.153711	0.202195	-0.0492844	0.809598	0.0425615	0.999213	-
792	377.196	6793.93	0.516133	6alpha-Hydroxycortisol; Nigakilactone A	C15291; C17012	C21H30O6	1.35109	0.000639953	0.179729	0.324617	0.0823048	0.92123	-0.425315	0.0407891	-0.548471	0.420478	-0.111112	0.352102	1.20599	0.00673406	-
793	378.089	6078.64	-0.0431285	Methicillin sodium	C13973	C17H19N2O6S.	-0.0247257	0.987896	-0.0348825	0.941891	0.0928364	0.933007	-1.25032	0.0124382	0.254884	0.177634	0.00986124	0.970422	0.0619705	0.999213	-
794	378.104	21723.2	0.694195	4-Deoxy-beta-D-gluc-4-enuronosyl-(1,3)-N-acetyl-D-galactosamine; 3-(4-Deoxy...	C01310; C04794	C14H21NO11	0.0357959	0.987896	-0.000674049	0.99913	0.0174395	0.990066	-0.641194	0.0203192	-0.0066682	0.962369	0.0187186	0.816765	-0.0197435	0.999213	-
795	379.031	12216.4	0.298569	Urate D-ribonucleotide	C03312	C10H13N4O10P	0.00957147	0.994449	0.0704538	0.730554	0.0837268	0.899491	-0.585839	0.00333888	-0.0409459	0.85806	-0.133487	0.00852836	0.040115	0.999213	-
796	379.083	29262.3	0.00267031	Diphyllin; Tetracenomycin F1 methylester	C10559; C12373	C21H16O7	-0.0332621	0.987896	-0.0271046	0.953259	0.141359	0.899491	-1.34985	0.0112684	0.254995	0.174094	-0.0155857	0.956176	0.0779775	0.999213	-
797	379.122	88198.8	0.619813	2-Methoxyestrone 3-sulfate	C08358	C19H24O6S	0.0521661	0.904672	0.0165188	0.953259	0.0389361	0.958299	-0.122379	0.170999	0.268484	0.0108495	0.0311985	0.747104	0.174008	0.716659	-
798	380.062	1.26787e+06	0.47406	2-Amino-5-formylamino-6-(5-phospho-D-ribosylamino)pyrimidin-4(3H)-one	C15563	C10H16N5O9P	0.015343	0.991193	-1.18234	0.00977515	-0.397888	0.255457	-1.20085	0.0042637	0.0279996	0.914201	0.0182556	0.836555	-0.103703	0.884963	-
799	380.992	20167.4	0.744586	Quercetin 3-sulfate	C00616	C15H10O10S	0.0409809	0.987896	-0.0689617	0.583612	-0.0283708	0.899491	-0.0439976	0.514876	-0.110731	0.505064	-0.118402	0.296462	0.0105209	0.999213	-
800	381.022	12579.6	-0.163735	Ticarcillin disodium	C14021	C15H14N2O6S2.	-0.0199203	0.987896	-0.0667248	0.708038	0.0679687	0.416762	-0.0453669	0.577868	0.0869147	0.303031	0.0635193	0.1812	-0.0165353	0.999213	-
801	381.178	7167.52	0.834166	Hydroxysenkirkine	C19435	C19H28NO7	0.119224	0.473095	0.0626785	0.733814	-0.051085	0.933007	-0.205387	0.0821678	0.141081	0.228936	-0.0798516	0.338836	-0.0209551	0.999213	-
802	382.094	4438.87	NA	Lilaline	C10602	C20H17NO7	-0.0281163	0.987896	-0.612328	0.0936277	-0.0450272	0.964335	-1.58694	0.00354737	-0.500106	0.00430557	-0.404991	0.0174284	0.0535752	0.999213	-
803	382.152	7939.41	0.545587	Prazosin	C07368	C19H21N5O4	-0.0506284	0.987896	-0.039827	0.810939	-0.0800681	0.82039	-0.25792	0.0049144	-0.0518726	0.85806	-0.0425889	0.67693	-0.0442805	0.999213	-
804	383.118	4500.05	0.731756	Acetyl-maltose	C02130	C14H24O12	0.491913	0.0239079	-0.745373	0.00977515	-0.356306	0.095118	-1.00537	0.00324362	-0.419929	0.0257524	-0.381616	0.000299806	-0.0390685	0.999213	x
805	383.132	6666.05	0.855081	Macrozamin	C08504	C13H24N2O11	0.370549	0.155772	-0.334043	0.0388269	-0.212151	0.397328	-0.589551	0.00707616	-0.245867	0.130443	-0.266258	0.0499042	0.0616722	0.999213	-
806	384.119	14977.7	0.809624	Nocardicin G	C17355	C19H19N3O6	0.25125	0.34541	-0.4333	0.0435408	-0.212093	0.338107	-0.619883	0.00496531	-0.277432	0.0509299	-0.422246	0.000927828	-0.0612593	0.999213	-
807	384.144	31536.1	NA	Polycarpine; Gloriosine	C09610; C19981	C21H23NO6	-0.0200374	0.987896	-0.0744598	0.613223	0.029857	0.967512	-0.336473	0.0336635	-0.0235766	0.875233	-0.325228	0.00223402	-0.057075	0.999213	-
808	385.069	4950.5	NA	(7R)-7-(4-Carboxybutanamido)cephalosporanate	C15666	C15H18N2O8S	0.000112034	0.999369	-0.139322	0.0785279	-0.0671985	0.854726	-0.226882	0.0345987	-0.461474	0.0142095	-0.686212	0.000256585	-0.0660039	0.999213	-
809	385.115	4945.03	0.259719	1-O-Sinapoyl-beta-D-glucose; 4-O-beta-D-Glucosyl-sinapate	C01175; C02919	C17H22O10	0.0317029	0.987896	-0.787615	0.00656986	-0.0717833	0.92123	-0.369828	0.0841421	-0.207094	0.132437	-0.450556	0.00259217	-0.0467657	0.999213	-
810	385.166	8796.44	NA	Burseran; (+)-Eudesmin	C10547; C10561	C22H26O6	-7.42585e-05	0.999369	0.161282	0.698025	-0.0885641	0.89934	-0.447435	0.0383867	-0.0417331	0.886483	0.168706	0.853307	-0.223947	0.716659	-
811	387.156	110445	0.130138	Nisoldipine	C07699	C20H24N2O6	-0.0514453	0.946833	0.0783562	0.746091	-0.0131195	0.990066	-0.167613	0.159973	0.0363858	0.84352	0.0208243	0.836555	0.0165227	0.999213	-
812	388.097	1754.34	-0.108441	Cefprozil	C06888	C18H19N3O5S	-0.0469595	0.904672	0.0253733	0.915492	-0.0455265	0.933987	-0.0863274	0.292075	0.0538616	0.846918	-0.0210612	0.812541	0.0158907	0.999213	-
813	388.142	31700.4	NA	Senaetnine	C10386	C20H23NO7	-0.0805152	0.90444	-0.0123878	0.960693	0.153269	0.782489	-0.145945	0.419373	0.132982	0.379463	0.0701985	0.63176	0.0224696	0.999213	-
814	389.107	17379.9	-0.335482	Monotropein	C09788	C16H22O11	-0.0158959	0.987896	-0.0195457	0.915492	-0.0544287	0.89585	-0.199182	0.0555256	0.069956	0.621936	0.139053	0.0493842	-0.00229969	0.999213	-
815	389.161	80052.9	0.0591431	Erioflorin acetate	C09412	C21H26O7	0.0251357	0.987896	0.0116993	0.960101	0.0095092	0.990596	-0.268713	0.0608329	0.201978	0.337343	0.116593	0.190636	0.0120419	0.999213	-
816	389.27	13914.5	0.828515	Bis(2-ethylhexyl)phthalate; 3alpha,12alpha-Dihydroxy-5beta-chol-6-enoate; D...	C03690; C11637; C14227; C14577; C15375	C24H38O4	0.078261	0.987896	0.10711	0.571976	0.584768	0.0385132	0.0948064	0.295337	-0.260851	0.380011	0.410497	0.0820601	-0.157892	0.999213	-
817	390.993	5427.61	0.236258	Aurothioglucose	C08193	C6H11AuO5S	-0.0224763	0.987896	0.112589	0.235709	0.0932433	0.447213	-0.0401025	0.629897	0.0599242	0.686038	0.00419689	0.965496	-0.00136525	0.999213	-
818	391.106	3976.53	0.340357	Macarpine	C06165	C22H18NO6	-0.00883035	0.994449	0.00126451	0.997576	0.0572011	0.914736	-0.0925491	0.295337	-0.197355	0.297416	-0.614365	8.14338e-05	-0.00580799	0.999213	-
819	391.285	77748.3	0.919654	Chenodeoxycholate; Deoxycholic acid; Ursodiol; Murideoxycholic acid; Hyodeo...	C02528; C04483; C07880; C15515; C15517; C17646; C17660; C17661; C17662; C17664; C17687	C24H40O4	0.171556	0.784037	0.142313	0.331771	1.90868	0.0108699	0.0631861	0.368451	-0.115673	0.769546	-0.0743689	0.809598	-0.0694057	0.999213	-
820	392.116	192699	0.653806	Dihydromacarpine	C05316	C22H19NO6	0.0671285	0.987896	-0.218929	0.218842	-0.251048	0.212615	-0.1696	0.150103	-0.177078	0.217236	-0.269301	0.0112657	-0.0214648	0.999213	-
821	393.042	178634	0.160156	Epithienamycin F	C17399	C13H18N2O8S2	-0.00539119	0.994449	-0.0915374	0.283854	0.00626146	0.973073	0.0126213	0.8839	-0.0866537	0.696903	-0.101632	0.215529	0.0963475	0.999213	-
822	393.119	1.97428e+06	0.711168	Aloesin; Podolactone B	C08994; C09172	C19H22O9	-0.0304672	0.987896	-0.0982661	0.653955	-0.0631079	0.899491	-0.241029	0.0339152	-0.103938	0.704535	-0.137722	0.0737137	0.0253018	0.999213	-
823	395.039	37220.4	-0.288087	Cephalothin	C07761	C16H16N2O6S2	-0.0334863	0.987896	0.0236396	0.806592	0.0154885	0.938197	-0.153298	0.107197	-0.0473021	0.765802	-0.0870032	0.0483865	0.0312969	0.999213	-
824	397.082	9300.28	0.595337	Ethoxysulfuron	C18440	C15H18N4O7S	0.0530794	0.987896	0.00127305	0.996863	-0.0364285	0.951998	-0.0580857	0.546788	0.0127142	0.958212	0.0185472	0.888413	0.130885	0.999213	-
825	397.083	7123.57	NA	Ethoxysulfuron	C18440	C15H18N4O7S	0.0530794	0.987896	0.00127305	0.996863	-0.0364285	0.951998	-0.0580857	0.546788	0.0127142	0.958212	0.0185472	0.888413	0.0269209	0.999213	-
826	397.095	9210.78	0.678062	Dihydro-NAME; Auramycinone; Nogalavinone	C12418; C12419; C18631	C21H18O8	0.0551542	0.987896	-0.0368415	0.88458	-0.0217556	0.954866	-0.208548	0.0614856	0.0276733	0.893086	0.0932868	0.469792	-0.0638121	0.999213	-
827	398.1	6543.54	0.521481	Nocardicin E; Nocardicin F	C01739; C17354	C19H17N3O7	0.42358	0.454642	-0.39209	0.0401611	-0.0260076	0.967512	0.0130452	0.899958	-0.100223	0.825989	-0.783121	0.00198462	-0.0592037	0.999213	-
828	398.124	16572.7	NA	Narcotoline	C09593	C21H21NO7	0.0473976	0.987896	-0.0672436	0.698025	-0.0905298	0.890624	-0.266516	0.043782	-0.221266	0.0564642	-0.237306	0.0524189	0.0858386	0.999213	-
829	400.099	8766.04	0.305528	Oxacillin	C07334	C19H19N3O5S	0.21828	0.622171	-0.266049	0.121687	0.023833	0.970958	-0.0378514	0.615825	-0.0412077	0.885313	-0.378313	0.00544891	0.0752157	0.999213	-
830	401.115	3907.64	0.510544	Saphenamycin	C12311	C23H18N2O5	-0.172389	0.570107	0.175454	0.44147	-0.00679763	0.9944	-0.0686291	0.576676	0.0284296	0.86802	0.0391357	0.543233	-0.00496376	0.999213	-
831	402.011	4917.22	0.677212	CDP	C00112	C9H15N3O11P2	0.0371195	0.987896	0.203446	0.0686021	0.328923	0.0212872	0.316273	9.96164e-05	0.376828	0.0539671	0.0640006	0.528188	0.0925457	0.999213	-
832	402.995	3116.09	0.645779	UDP	C00015	C9H14N2O12P2	-0.248122	0.624394	0.219015	0.0870108	0.301386	0.0385132	0.379434	1.52298e-05	0.0446423	0.864855	-0.165908	0.51284	-0.131651	0.999213	-
833	405.193	3291.63	0.879674	Argentine	C10753	C23H26N4O3	0.30594	0.22609	-0.0428825	0.729871	-0.0865324	0.81615	-0.27626	0.00754829	0.199124	0.289131	0.812774	0.539883	0.175672	0.889265	-
834	405.264	17060	0.824672	3alpha,7alpha-Dihydroxy-12-oxo-5beta-cholanate; 3alpha,12alpha-Dihydroxy-7-...	C01292; C04643; C10298	C24H38O5	-0.149821	0.825916	-0.0183126	0.922851	-0.0622331	0.912889	-0.503091	0.00872734	-0.186111	0.555652	-0.0182548	0.956176	0.158093	0.999213	-
835	407.28	166410	0.882799	Cholic acid; Bile salt; 3alpha,7alpha,12beta-Trihydroxy-5beta-cholanate; Ur...	C00695; C01558; C04661; C17644; C17647; C17649; C17650; C17654; C17657; C17667; C17668; C17726; C17727; C17737	C24H40O5	0.405818	0.593405	0.0264402	0.86017	0.177689	0.5193	-0.346917	0.0247644	-0.0888646	0.914201	-0.318468	0.129292	-0.131471	0.999213	-
836	409.148	9321.58	0.809169	Bruceine D	C08752	C20H26O9	0.0919291	0.802024	-0.233276	0.0425984	-0.134395	0.621825	-0.379527	0.00502823	0.0146935	0.947556	-0.11446	0.217374	-0.0157711	0.999213	-
837	410.151	11089.5	-0.232819	Oxidized Oplophorus luciferin	C15038	C25H21N3O3	-0.0129834	0.991193	0.043215	0.817588	-0.108436	0.725708	-0.28593	0.0128167	-0.202003	0.226529	-0.239424	0.087745	-0.0141087	0.999213	-
838	413.047	4297.48	0.255929	Sulbenicillin	C11170	C16H18N2O7S2	0.0112151	0.994449	0.0674123	0.761719	-0.00325434	0.995251	0.17662	0.0863738	0.0214507	0.948263	0.083275	0.135689	-0.0237849	0.999213	-
839	413.068	132722	0.220669	(7R)-7-(5-Carboxy-5-oxopentanoyl)aminocephalosporinate	C04712	C16H18N2O9S	0.00956962	0.994449	0.024497	0.866182	-0.0364726	0.899491	0.074655	0.331427	-0.0452596	0.864855	-0.0441831	0.53804	0.0315174	0.999213	-
840	413.108	4706.52	0.671821	Asperuloside	C09769	C18H22O11	0.0265941	0.987896	-0.0181065	0.946073	0.0631173	0.92123	-0.0892975	0.375258	0.0093707	0.95966	-0.190632	0.180354	0.0219757	0.999213	-
841	415.237	4161.7	0.671404	Distigmine	C16823	C22H32N4O4	-0.109357	0.960224	-0.116515	0.625163	-0.159814	0.733593	-0.368947	0.0290138	0.138583	0.605068	0.180713	0.471013	0.0327034	0.999213	-
842	415.285	283950	0.271026	Methandriol dipropionate	C14634	C26H40O4	0.0517468	0.96551	-0.233081	0.00533808	-0.66591	0.000685966	-0.506711	0.000184011	0.0661699	0.82909	0.238855	0.112635	-0.0688927	0.999213	-
843	418.956	1.24746e+06	NA	1D-myo-Inositol 1,3,4-trisphosphate; D-myo-Inositol 1,4,5-trisphosphate	C01243; C01245	C6H15O15P3	-0.0686184	0.987896	-0.770314	0.0017377	0.0883353	0.691594	0.243789	0.0415114	0.00598577	0.957817	-0.0303787	0.812542	-0.17775	0.893369	-
844	419.137	140972	0.345038	Melampodin A; Glycyphyllin; Isorhapontin; Rhaponticin	C09500; C09754; C10266; C10288	C21H24O9	0.0576229	0.903576	-0.021417	0.927617	-0.0815867	0.869068	-0.138765	0.120044	-0.0640572	0.78325	-0.0203612	0.902001	0.0238078	0.999213	-
845	420.183	27194.1	NA	Latrunculin A	C16901	C22H31NO5S	0.223524	0.536533	0.00583002	0.960101	-0.092886	0.623622	-0.222293	0.00787175	0.00161844	0.990504	-0.820667	0.00135367	-0.100248	0.999213	-
846	421.076	10409.5	-0.105622	alpha,alpha'-Trehalose 6-phosphate; Sucrose 6'-phosphate; Maltose 6'-phosph...	C00689; C02591; C02995; C04534; C05396; C16688; C18050; C20237	C12H23O14P	0.0343987	0.987896	-0.0197411	0.905865	-0.00613403	0.990066	-0.26805	0.00621812	0.0264138	0.867926	-0.0180987	0.839732	0.0287813	0.999213	-
847	422.188	54690.6	0.90908	4-Chloro-alpha-[4-[2-(diethylamino)ethoxy]phenyl]-alpha-phenylbenzeneethanol	C15067	C26H30ClNO2	0.0845292	0.863987	-0.021335	0.875278	-0.0958641	0.579621	-0.37823	0.000603945	0.023491	0.898231	-0.0925207	0.430442	-0.104616	0.989593	-
848	423.128	48597.3	0.486679	Ginkgolide B; Ginkgolide J; Rutarin; Ginkgolide M	C07602; C07604; C09309; C16816	C20H24O10	0.0483457	0.959728	-0.266263	0.0405587	-0.30927	0.0958115	-0.240853	0.043525	0.0370554	0.717093	0.00129948	0.998425	-0.0267478	0.999213	-
849	425.034	13423	NA	Cefoxitin sodium	C08106	C16H16N3O7S2.	-0.024179	0.987896	0.0515177	0.481976	0.0608034	0.81722	-0.158198	0.042863	0.055752	0.825989	0.0259788	0.741209	0.0552504	0.999213	-
850	426.022	30665.4	0.726402	ADP; Adenosine 3',5'-bisphosphate; dGDP; Adenosine 2',5'-bisphosphate	C00008; C00054; C00361; C03850	C10H15N5O10P2	0.122617	0.533642	0.0852222	0.622207	0.0751306	0.54067	0.241587	0.00172748	0.805124	0.00302332	0.0964612	0.322433	0.11419	0.714554	-
851	431.099	331110	-0.105429	Vitexin; Isovitexin; Apigenin 7-O-beta-D-glucoside; Genistein 7-O-beta-D-gl...	C01460; C01714; C04608; C09126; C10345; C10420; C16911	C21H20O10	-0.125611	0.533642	-0.482416	0.00834079	-1.70621	0.000626231	-2.01491	0.000519162	0.00346329	0.979639	0.186899	0.069078	-0.226095	0.45982	x
852	432.125	429099	0.378604	N-Acetylaspartylglutamylglutamate	C20776	C16H23N3O11	0.0280496	0.987896	-0.019882	0.919434	0.00875565	0.990596	-0.0802514	0.433884	-0.0769721	0.765802	0.00329287	0.972713	0.0250417	0.999213	-
853	432.204	5952.86	0.820613	Mycophenolate mofetil	C07908	C23H31NO7	-0.144913	0.17952	-0.00383695	0.982698	0.207586	0.890624	-0.204242	0.282026	-0.0472016	0.862607	-0.451011	0.00263063	-0.124387	0.999213	-
854	432.312	4281.32	0.77803	Glycolithocholate	C15557	C26H43NO4	0.113403	0.826697	-0.148089	0.283854	-2.46384	0.00056373	-2.59985	0.00119747	0.0648402	0.864855	0.117302	0.464241	-0.0757165	0.999213	-
855	433.016	26609.5	0.548611	Ponceau MX; Ponceau SX	C19294; C19510	C18H14N2O7S2.	-0.00827801	0.994449	-0.17689	0.32614	-0.0090375	0.990066	-0.03788	0.810258	-0.0298326	0.846918	0.0840384	0.188732	0.0794898	0.999213	-
856	433.089	105435	0.783006	(L-Seryl)adenylate	C05820	C13H19N6O9P	-0.102041	0.827209	-0.0208582	0.927958	-0.0565717	0.89585	-0.059368	0.467945	-0.0164259	0.948263	-0.00917943	0.956176	-0.0588301	0.999213	-
857	437.145	11107.4	0.823459	Glaucolide B; sec-o-Glucosylhamaudol	C09465; C17484	C21H26O10	0.066877	0.892623	0.0522202	0.722169	0.00643779	0.990596	-0.280489	0.00805835	0.0483781	0.741908	0.000368729	1	0.000655779	0.999213	-
858	439.127	9729.88	0.614912	Ginkgolide C	C07603	C20H24O11	-0.0535874	0.987896	-0.059778	0.753928	0.00261962	0.996123	-0.177569	0.122985	-0.0172086	0.951994	0.18757	0.188732	0.0526764	0.999213	-
859	441.337	7493.08	0.844598	Testosterone decanoate; 4alpha-Methylzymosterol-4-carboxylate	C14607; C15808	C29H46O3	-0.0683476	0.987896	-0.067095	0.683619	-0.149751	0.697253	-0.647901	0.00292439	0.0120621	0.958212	0.32254	0.00997691	-0.100601	0.999213	-
860	442.017	538526	0.701483	GDP; 8-Oxo-dGDP	C00035; C20176	C10H15N5O11P2	0.040657	0.987896	0.196365	0.0799285	0.240825	0.129403	0.0935478	0.0565488	0.601357	0.0456846	-0.0444456	0.602663	-0.0110694	0.999213	-
861	443.258	90342.3	0.485654	3-(O-Geranylgeranyl)-sn-glycerol 1-phosphate	C04590	C23H41O6P	0.177791	0.751845	0.0100989	0.969443	0.0800806	0.934215	-0.190585	0.286796	0.509826	0.0081997	0.120595	0.571567	0.0998037	0.999213	-
862	445.078	7717.24	0.214729	Baicalin	C10025	C21H18O11	0.0246368	0.987896	-0.123442	0.358834	-0.0676368	0.411322	-1.08531	0.000184011	0.0126271	0.957817	0.046513	0.584796	0.118039	0.952756	-
863	445.299	3627.07	-0.0859869	Carpipramine maleate	C12896	C28H38N4O.	-0.0279776	0.987896	-0.164961	0.0509995	-0.0956757	0.0557499	-0.540513	0.000644706	-0.124034	0.177634	-0.419431	0.00607828	-0.0567213	0.999213	-
864	447.093	1663.17	0.279036	Quercitrin; Isoorientin; Luteolin 7-O-beta-D-glucoside; Carthamone; Fisetin...	C01750; C01821; C03951; C08598; C10042; C10114; C12249; C12626; C16409; C17056	C21H20O11	-1.02443	0.0326089	-2.03797	0.000687208	-2.35466	0.000196899	-3.33558	0.000311613	0.176648	0.108837	-0.784618	0.00259217	-0.851374	0.018743	x
865	447.26	154724	0.612855	N-Acetyl-leu-leu-tyr-amide	C11297	C23H36N4O5	0.0528079	0.987896	-0.153034	0.398522	-0.133428	0.748544	-0.623904	0.00594254	0.226731	0.293351	0.228682	0.187942	-0.0814593	0.999213	-
866	448.307	1.06393e+06	0.783761	Glycodeoxycholate; Glycochenodeoxycholate	C05464; C05466	C26H43NO5	0.349273	0.890038	0.0176283	0.936899	-2.42155	0.000685966	-0.514748	0.0208336	0.153603	0.666427	0.283208	0.217168	-0.00634479	0.999213	-
867	449.188	110420	0.861015	Acotiamide	C14127	C21H30N4O5S	0.0752745	0.987454	-0.0095411	0.960101	-0.114093	0.733593	-0.169085	0.0561168	0.0933888	0.628011	-0.00234271	0.997021	-0.0507961	0.999213	-
868	450.313	19054.7	0.781959	Teleocidin B-1	C05150	C28H41N3O2	0.212818	0.640858	0.0092841	0.960101	-2.04737	0.000685966	-0.418643	0.027711	0.201999	0.438488	0.068411	0.803324	0.00255302	0.999213	-
869	451.063	8616.38	0.464377	Cefovecin sodium	C13142	C17H18N5O6S2.	0.014525	0.994449	0.0473144	0.814737	-0.0485405	0.904272	-0.0693029	0.238108	-0.0615097	0.846918	-0.235225	0.0180232	-0.0294198	0.999213	-
870	455.155	28924.4	0.789622	5,10-Methenyltetrahydrofolate	C00445	C20H22N7O6	-0.0298404	0.987896	-0.0439831	0.814737	-0.0666245	0.92123	-0.0881786	0.375668	0.0470005	0.858699	-0.132391	0.119523	-0.158205	0.716659	-
871	461.109	25772.6	0.574379	Isoscoparine; 6-Methoxyluteolin 7-rhamnoside; Swertiajaponin; Tectoridin; H...	C05990; C10104; C10187; C10533; C17762	C22H22O11	-0.143442	0.570107	-0.294577	0.0212392	-0.775121	0.000912564	-0.896613	0.00108499	-0.00296352	0.985114	0.233076	0.0427342	-0.205287	0.39643	x
872	461.172	78042.6	0.880482	(+)-Plicamine	C12254	C26H26N2O6	0.053384	0.987896	0.0414441	0.82839	-0.0314619	0.958299	-0.259783	0.0333022	0.171785	0.350089	-0.0802026	0.528188	-0.0115812	0.999213	-
873	461.204	17454.3	0.88323	Patrinoside; Valerosidatum	C11640; C17068	C21H34O11	-0.0794318	0.903576	-0.031068	0.866182	-0.0568068	0.906947	-0.329146	0.00967953	0.0372635	0.86802	-0.119093	0.352102	-0.0858283	0.999213	-
874	463.088	99675.7	0.0609239	Quercetin 3-O-glucoside; Gossypetin 8-rhamnoside; Hyperin; Myricitrin; Quer...	C05623; C10050; C10073; C10108; C12639; C16410; C17763	C21H20O12	0.284588	0.0595375	0.743988	0.000687208	0.426347	0.199829	-2.14117	0.00053343	0.336546	0.0127064	-1.64314	0.000552406	0.0744201	0.999213	x
875	464.22	13283.9	0.852196	Codonocarpine	C10582	C26H31N3O5	0.0525273	0.987896	-0.021796	0.909668	-0.105485	0.844062	-0.340209	0.0107083	0.268069	0.0446339	0.122412	0.377387	0.0377734	0.999213	-
876	464.302	3692.4	0.770579	Glycocholate	C01921	C26H43NO6	0.434706	0.927816	0.0269757	0.909668	-0.191538	0.670001	-0.216508	0.159906	-0.198282	0.830575	0.159333	0.285234	-0.0732575	0.999213	-
877	465.092	3553.32	0.00909835	N-Adenylylanthranilate	C03293	C17H19N6O8P	0.0696393	0.953851	0.210114	0.0153803	0.000376611	0.999715	-0.489313	0.000718343	0.0225358	0.898231	-0.415967	0.00198462	-0.0162687	0.999213	-
878	465.139	14187.7	0.802037	Agnuside	C09765	C22H26O11	0.141193	0.904672	-0.00661294	0.969443	-0.220012	0.296931	-0.0984781	0.408487	0.062007	0.836313	1.30755	0.550207	-0.34873	0.0879114	-
879	465.305	95628.4	0.779246	Cholesterol sulfate	C18043	C27H46O4S	0.228815	0.784037	0.021219	0.927958	-0.170538	0.72641	-0.232351	0.139773	-0.199776	0.626438	0.00560646	0.972713	-0.0506481	0.999213	-
880	466.307	7230.46	0.784582	Oxethazaine	C12552	C28H41N3O3	0.0113816	0.994449	0.0218408	0.927958	-0.15124	0.782489	-0.210666	0.147921	0.0523389	0.85806	0.120724	0.659043	0.0405994	0.999213	-
881	466.966	4793.29	0.678539	dUTP	C00460	C9H15N2O14P3	0.0252719	0.987896	-0.0185048	0.789758	0.0492302	0.89934	0.115223	0.207899	-0.101692	0.546636	-0.0518693	0.599357	-0.0423424	0.999213	-
882	467.134	5484	0.800828	104-1; 104-2; 8-D-Olivosyl-landomycin	C12403; C12407; C18778	C25H24O9	0.0600841	0.986291	-0.0606595	0.480274	-0.0854837	0.72641	-0.110755	0.228936	0.124065	0.389436	0.219914	0.736119	-0.11428	0.999213	-
883	468.115	9484.13	0.59768	Kalbreclasine	C08529	C20H23NO12	-0.0440527	0.987896	-0.0570592	0.732828	-0.0368003	0.933007	-0.259018	0.0104508	-0.259159	0.182619	-0.0911641	0.711595	-0.0512383	0.999213	-
884	468.149	2658.55	0.709756	Indol-3-ylacetyl-myo-inositol L-arabinoside	C04611	C21H27NO11	0.0405073	0.987896	-0.176031	0.311538	-0.00126759	0.9978	-0.3279	0.0276744	0.183365	0.215472	0.0670835	0.388495	-0.0454997	0.999213	-
885	473.183	12467.9	-0.231845	Robustaol A	C09968	C25H30O9	-0.205724	0.34541	-0.0805033	0.672679	0.043093	0.943585	-0.304084	0.0228537	0.0301516	0.846918	0.0131342	0.947361	-0.141544	0.999213	-
886	473.956	116357	0.427549	Adenylylselenate	C05686	C10H14N5O10PSe	0.00491143	0.994449	-0.0454364	0.864147	-0.012377	0.97548	0.112672	0.233287	-0.0283835	0.895729	0.0890686	0.272244	-0.0896661	0.999213	-
887	479.084	51956.4	0.570022	Gossypin; 4-o-Galloylbergenin; 11-o-Galloylbergenin	C10051; C17514; C17520	C21H20O13	-0.556323	0.0921943	0.596944	0.00355619	0.300612	0.347681	-0.602449	0.00497324	0.160795	0.345901	-0.344311	9.72258e-05	-0.384779	0.0720473	-
888	479.193	2495.58	0.83889	Acevaltrate	C16752	C24H32O10	0.0558794	0.987896	0.00867399	0.960693	-0.0608819	0.89585	0.31941	0.0235246	0.0709846	0.804644	0.0183158	0.898632	0.0823852	0.999213	-
889	480.126	7992.05	0.141801	Cefepime hydrochloride	C12557	C19H25N6O5S2.	-0.0159307	0.991193	-0.101648	0.769139	-0.0231511	0.964335	-0.431776	0.0110529	-0.0888687	0.622917	-0.0992956	0.0697069	0.0541222	0.999213	-
890	481.28	7002.25	0.688066	Fusicoccin H	C09093	C26H42O8	-0.0224464	0.987896	-0.0657632	0.65362	-0.142175	0.674266	-0.420588	0.0188765	-0.0602855	0.723905	-0.100972	0.607665	-0.0496078	0.999213	-
891	482.96	3538.02	-0.017101	UTP	C00075	C9H15N2O15P3	-0.0316691	0.987896	-0.0348739	0.810939	0.00310991	0.995251	0.126501	0.107454	-0.0141119	0.94369	0.0116092	0.890845	-0.0382042	0.999213	-
892	483.329	3647.25	0.743415	N-tert-Butyloxycarbonyl-deacetyl-leupeptin	C11604	C23H44N6O5	0.0228283	0.987896	0.0323559	0.767325	-0.000890759	0.996123	-0.367821	0.00170292	0.0497874	0.865504	0.223845	0.177439	-0.000970083	0.999213	-
893	484.06	42202	0.428437	alpha,beta-Dihydroxyethyl-TPP	C13378	C14H23N4O9P2S	0.0213449	0.987896	-0.00592956	0.978244	-0.0570212	0.673866	-0.112854	0.107454	-0.00490489	0.985114	-0.0998781	0.154944	-0.05394	0.999213	-
894	489.323	5354.04	0.557033	Homaline	C10599	C30H42N4O2	-0.06926	0.886603	-0.116639	0.329285	-0.0944413	0.499057	-0.161308	0.060132	-0.202092	0.255984	0.0601332	0.660241	-0.0483776	0.999213	-
895	491.266	4851.14	0.683338	Mucronine B	C10010	C28H36N4O4	-0.0954932	0.842758	0.0257362	0.875278	-0.00306513	0.995251	-0.303256	0.000644706	-0.0367163	0.864855	0.00178517	0.997021	-0.0320474	0.999213	-
896	495.152	40575.3	0.599983	Mycophenolic acid O-acyl-glucuronide	C20383	C23H28O12	0.0816879	0.904672	-0.0263488	0.915492	0.171719	0.416492	-0.116813	0.221905	0.104902	0.561941	-0.0148151	0.928154	0.0504919	0.999213	-
897	497.103	5324.99	0.882556	Bis-gamma-glutamylcystine	C03646	C16H26N4O10S2	-0.00769355	0.994449	0.0902909	0.671661	-0.00377404	0.995251	0.0819537	0.376243	0.169815	0.33389	0.0694608	0.388981	-0.0433614	0.999213	-
898	498.289	11168.5	0.697543	Taurodeoxycholate; Taurochenodeoxycholate; Tauroursodeoxycholic acid	C05463; C05465; C16868	C26H45NO6S	0.364208	0.775311	0.0391667	0.875278	-0.0865505	0.92123	-0.360037	0.0652734	-0.116363	0.86222	-0.143125	0.338836	-0.0747175	0.999213	-
899	499.292	3550.11	0.694566	Mupirocin	C11758	C26H44O9	0.0125143	0.994449	0.0319772	0.909668	-0.10059	0.899491	-0.356493	0.0652575	0.194591	0.380495	0.0190787	0.916948	-0.0718774	0.999213	-
900	510.161	6139.08	0.843518	Hygromycin A	C17579	C23H29NO12	-0.0820579	0.959728	-0.0319757	0.836781	-0.0308853	0.94594	-0.205082	0.0262549	-0.0640392	0.836313	-0.216138	0.0538346	-0.140735	0.981279	-
901	511.244	206741	NA	Norcholestenol iodomethyl (131 I)	C13547	C27H45IO	-0.0762412	0.987896	0.0598026	0.665403	0.0738434	0.844062	-0.106323	0.181979	0.0921917	0.598755	0.142751	0.523338	-0.0223709	0.999213	-
902	513.231	3308.95	0.931642	Telmisartan	C07710	C33H30N4O2	-0.0427335	0.987896	0.0486124	0.711664	-0.0266582	0.964335	-0.213945	0.0244664	0.277366	0.0196094	0.0248851	0.893726	0.0762356	0.999213	-
903	514.073	14400.8	0.059957	Cefozopran	C11203	C19H17N9O5S2	-0.0437734	0.987896	0.079234	0.598477	-0.0652133	0.899491	-0.0736482	0.389174	0.0324326	0.879145	-0.0284281	0.539883	-0.0619364	0.999213	-
904	514.284	8170.66	0.702346	Taurocholate; Taurohyocholate	C05122; C15516	C26H45NO7S	0.466731	0.868757	0.0262435	0.92503	-0.073232	0.933007	-0.275115	0.128533	-0.196505	0.751021	0.266167	0.0312567	-0.04565	0.999213	-
905	515.25	3532.82	0.832161	Eriojaposide B	C17889	C25H40O11	-0.0885917	0.892623	0.0237488	0.915492	-0.0510641	0.94594	-0.307465	0.0331895	0.0600542	0.784788	0.0938987	0.501962	-0.0203974	0.999213	-
906	515.287	8496.89	0.710514	L-Olivosyl-oleandolide	C11991	C26H44O10	0.217762	0.802024	0.0187581	0.949046	-0.0704804	0.933007	-0.291078	0.113877	0.684094	0.0107772	0.0236885	0.884533	-0.027673	0.999213	-
907	517.188	4822.9	0.912129	Gossypol	C07667	C30H30O8	0.202263	0.774257	-0.148853	0.311538	-0.0329211	0.94742	-0.133972	0.153569	0.082244	0.747723	-0.098781	0.474632	-0.0654797	0.999213	-
908	518.092	9071.79	0.525144	Ceforanide	C06884	C20H21N7O6S2	0.0138055	0.994449	-0.074349	0.612058	-0.00768208	0.990066	-0.0836082	0.0457418	-0.0515705	0.86802	-0.0673031	0.539883	0.00779618	0.999213	-
909	520.327	13626.6	0.772097	Mycinamicin VII	C15683	C29H47NO7	0.0909188	0.868943	-0.129181	0.531155	2.19182	0.0199879	1.39759	5.39592e-05	0.212736	0.409152	0.184744	0.320051	-0.0794473	0.999213	-
910	522.26	9104.89	0.738633	Calcimycin	C11309	C29H37N3O6	0.0354388	0.987896	-0.0112705	0.960101	-0.0674462	0.899491	-0.261525	0.0308061	0.200082	0.293351	0.0153076	0.956176	-0.0134735	0.999213	-
911	527.154	3986.34	0.907828	Tremulacin	C09973	C27H28O11	0.103579	0.960224	0.0636311	0.810939	0.0451077	0.931569	-0.210347	0.0114181	-0.0659457	0.839162	-0.0282061	0.752686	0.00355295	0.999213	-
912	529.462	12577	0.796281	Epoxymurin-A	C08484	C35H62O3	-0.00308362	0.994449	-0.00489951	0.976497	0.0140588	0.970958	-0.0495992	0.632437	-0.112401	0.428148	0.00644673	0.963557	-0.0117829	0.999213	-
913	531.26	4135.48	0.952505	Calactin; Calotropin; Roridin A	C08854; C08855; C09716	C29H40O9	0.121534	0.679669	-0.00495692	0.967584	-0.0494469	0.899548	-0.308967	0.00400718	0.113114	0.572026	0.183431	0.215529	-0.00728295	0.999213	-
914	531.297	5652.16	0.791651	Cucurbitacin J; Simplexin	C08801; C09185	C30H44O8	0.0603474	0.986291	-0.0742928	0.650367	-0.127161	0.790779	-0.499049	0.00535449	-0.0320474	0.85806	-0.0201128	0.816765	0.0817088	0.999213	-
915	533.024	95970.4	0.134923	UDP-L-Ara4O	C16155	C14H20N2O16P2	0.0657379	0.960224	0.123493	0.143834	-0.0360117	0.899491	-0.0908264	0.199809	-0.0294464	0.864855	0.034848	0.765755	0.00227848	0.999213	-
916	533.094	10496.8	-0.070636	Luteolin 7-O-(6''-malonylglucoside)	C10103	C24H22O14	-0.119724	0.634019	0.0240837	0.923863	-0.0419364	0.951998	-1.5491	0.000883546	-0.0221613	0.833322	-0.0729032	0.276068	-0.114483	0.99801	-
917	533.187	27251.3	0.899193	5''-Phosphoribostamycin	C18004	C17H35N4O13P	0.0308889	0.987896	0.0127064	0.93316	-0.058842	0.897943	-0.0482163	0.55021	0.0979958	0.622271	-0.227745	0.0260656	0.155863	0.88212	-
918	534.216	3515.25	NA	Asperlicin	C11688	C31H29N5O4	0.0300954	0.987896	-0.0127171	0.919434	0.00639527	0.990596	-0.0986232	0.268672	0.115781	0.627525	0.439871	0.0102037	0.000728082	0.999213	-
919	539.011	9070.41	0.191812	Cefonicid sodium	C08105	C18H16N6O8S3.	0.00453794	0.994449	-0.0217479	0.895311	0.0666486	0.512366	-0.0337214	0.68635	0.073038	0.622917	-0.00548201	0.970422	0.00887774	0.999213	-
920	540.906	3284.97	NA	Quercetin 3,3',7-trissulfate; Quercetin 3,4',7-trissulfate	C03897; C03898	C15H10O16S3	-0.0130324	0.987896	-0.0984507	0.480938	0.0254114	0.931569	-0.0886195	0.393772	-0.104161	0.307334	-0.0983395	0.0349616	-0.0461406	0.999213	-
921	549.088	130116	0.571381	Quercetin 3-O-(6-O-malonyl-beta-D-glucoside)	C12638	C24H22O15	-0.185174	0.215771	0.321623	0.025144	0.324434	0.33254	-0.506907	0.00316209	0.0155778	0.934903	-0.0744438	0.169627	-0.398591	0.141652	-
922	553.191	24666.8	0.882374	Osthenol-7-O-beta-D-gentiobioside	C17476	C26H34O13	-0.0676664	0.987896	-0.0153415	0.922851	-0.0686978	0.868437	-0.280947	0.00754829	-0.00151599	0.990951	-0.0333312	0.823108	0.0144218	0.999213	-
923	555.207	3019.57	0.910204	11-Hydroxyiridodial glucoside pentaacetate; 8-epi-11-Hydroxyiridodial gluco...	C11666; C11667	C26H36O13	0.105881	0.774257	0.0123328	0.949046	-0.0364715	0.94594	-0.166708	0.0586931	-0.182389	0.173231	0.0650903	0.401327	-0.0801004	0.999213	-
924	561.234	9880.37	0.744399	Eriocarpin	C08865	C29H38O11	-0.210605	0.149308	0.0105423	0.963245	-0.046872	0.951998	-0.71014	0.00324362	0.0796858	0.666427	-0.0582171	0.565845	-0.181735	0.39643	-
925	561.393	12432.7	0.876613	3-Hexaprenyl-4,5-dihydroxybenzoate	C05200	C37H54O4	0.129754	0.915783	-0.081392	0.612058	-1.12453	0.000912564	-1.52634	0.00148447	0.141555	0.67657	0.154747	0.338836	0.0127656	0.999213	-
926	565.44	11509.1	0.540126	Anhydrorhodovibrin	C15877	C41H58O	0.0515932	0.987896	0.0192026	0.947249	-0.0519269	0.871862	-0.186884	0.167895	0.216261	0.346081	0.241275	0.20104	-0.0271918	0.999213	-
927	568.343	8684.28	0.860701	Janthitrem C	C20601	C37H47NO4	0.00875206	0.994449	-0.051068	0.730554	-0.17855	0.533937	-0.548133	0.000940636	-0.0707428	0.708555	0.0662276	0.402598	-0.105475	0.744401	-
928	570.358	3635.41	0.705053	21,22-Diprenylpaxilline	C20561	C37H49NO4	0.0197756	0.994449	-0.0935061	0.591471	-0.146619	0.522392	-0.69795	0.00013003	0.0921444	0.740385	0.236265	0.204473	-0.0234427	0.999213	-
929	577.373	7489.58	0.627748	Asparagoside A; Timosaponin A-I	C08886; C17074	C33H54O8	0.0275333	0.987896	-0.0479388	0.76273	0.318038	0.0200033	-0.150182	0.146845	-0.107066	0.366504	0.0578037	0.563152	0.0162939	0.999213	-
930	580.144	6562.54	0.823184	Cyanidin 3-O-(beta-D-xylosyl-(1->2)-beta-D-galactoside); Cyanidin 3-O-beta-...	C20468; C20490	C26H29O15	0.00912379	0.994449	-0.0105097	0.965418	-0.0713361	0.814177	-0.166221	0.0136611	0.110928	0.415707	-0.0516155	0.741489	-0.133043	0.930937	-
931	581.434	11694.9	0.457856	Hydroxyspirilloxanthin; Spheroidenone; R.g.-Keto I; Thiothece-474	C15879; C15903; C16277; C16279	C41H58O2	-0.018	0.994449	-0.0306013	0.875278	0.137839	0.185536	0.106043	0.0457604	0.237075	0.292107	0.210657	0.12801	0.011265	0.999213	-
932	583.292	14429.9	0.957028	Euphornin	C19991	C33H44O9	0.0631107	0.914867	0.0351747	0.810939	-0.0501153	0.928714	-0.192885	0.0325883	0.107983	0.455536	0.104923	0.408704	0.0973773	0.999213	-
933	585.307	6417.44	0.840241	5-Oxoavermectin ''2b'' aglycone	C11954	C33H46O9	-0.0456953	0.987896	0.0274386	0.893269	-0.0267771	0.973481	-0.331518	0.0353424	0.0506789	0.830575	0.155444	0.441541	0.0774257	0.999213	-
934	586.938	100355	NA	Inosine 5'-tetraphosphate	C03614	C10H16N4O17P4	0.0143976	0.991193	-0.0304709	0.869913	-0.0300914	0.899491	-0.134141	0.100698	0.0714478	0.717093	0.0974071	0.0390222	0.00594096	0.999213	-
935	591.262	2937.65	0.954811	Pheophorbide a	C18021	C35H36N4O5	0.0475086	0.987896	0.0416533	0.764962	-0.0459808	0.928714	-0.28683	0.0116348	0.0372768	0.84352	0.104683	0.386187	0.0540013	0.999213	-
936	593.151	2711.95	-0.122216	Isoorientin 2''-O-rhamnoside; Vitexin 2''-O-beta-D-glucoside; Isovitexin 2'...	C03870; C04024; C04199; C08064; C10195; C10513; C12630; C17600	C27H30O15	-0.103226	0.587962	0.0532344	0.767325	-0.0409415	0.94594	-4.81603	0.00046815	0.176735	0.0850742	0.0390235	0.741489	-0.0736697	0.999213	-
937	593.194	5071.3	0.1974	Cannabisin A	C17905	C34H30N2O8	-0.0383235	0.987896	0.0632826	0.672679	0.476229	0.166711	0.920863	0.00217878	0.252172	0.092638	0.430374	0.00669078	0.0546428	0.999213	-
938	593.267	43306.5	0.930115	Obamegine; Aromoline; (+)-Bebeerine; Daphnandrine; Isochondrodendrine; (+)-...	C06513; C06514; C09352; C09415; C09543; C11141	C36H38N2O6	0.153933	0.26639	0.0246061	0.767325	-0.0673904	0.844062	-0.325483	0.000376154	0.0943808	0.356746	0.0977138	0.343835	-0.136629	0.716659	-
939	593.332	8615.9	0.310635	13-Deoxytedanolide	C16861	C32H50O10	-0.0670813	0.857253	-0.20195	0.321274	-0.380592	0.162887	-0.602844	0.00104297	-0.0234785	0.864189	-0.0581508	0.137966	-0.197249	0.354287	-
940	594.006	9621.2	0.0960875	3-(ADP)-2-phosphoglycerate	C03673	C13H20N5O16P3	-0.0375897	0.987896	0.0545045	0.71702	-0.0491558	0.905119	-0.237073	0.0126802	0.016397	0.948263	-0.0203049	0.770621	0.000190497	0.99945	-
941	594.291	34954.2	0.907548	Kni 102	C15654	C31H41N5O7	0.0418769	0.987896	0.0202874	0.909668	-0.021374	0.970958	-0.195118	0.0565488	0.149369	0.154292	0.118762	0.407104	0.0325122	0.999213	-
942	595.04	131960	0.443983	ADP-5-ethyl-4-methylthiazole-2-carboxylate	C20784	C17H22N6O12P2S	-0.0791702	0.843802	-0.0398114	0.71702	-0.00500706	0.990596	-0.151991	0.097945	0.0453058	0.776111	0.0950228	0.0558642	-0.172654	0.884963	-
943	595.132	42401.6	NA	Quercetin 3-O-[beta-D-xylosyl-(1->2)-beta-D-glucoside]	C12637	C26H28O16	-0.0705786	0.848664	0.136011	0.247229	0.196974	0.545299	-0.909782	0.00159807	0.0626643	0.683461	0.0902364	0.10069	-0.155502	0.937018	x
944	595.282	357518	0.931148	Berbamunine; Guattegaumerine; Magnoline	C05177; C06511; C06515	C36H40N2O6	0.00557887	0.994449	0.0312194	0.814737	-0.0250885	0.963961	-0.221079	0.0291158	0.164797	0.151132	0.0836587	0.459563	-0.046933	0.999213	-
945	595.349	6540.26	-0.0657757	L-Urobilinogen	C05789	C33H48N4O6	-0.15451	0.239071	-0.156867	0.348209	-0.373985	0.176142	-0.521757	0.00479783	0.0201622	0.864293	-0.0948528	0.188511	-0.156918	0.879223	-
946	595.379	10341.5	0.656382	Astaxanthin	C08580	C40H52O4	0.0225065	0.991193	0.0173383	0.938474	-0.145479	0.634849	-0.539193	0.00775763	-0.0342872	0.86802	0.207869	0.0711958	-0.0885599	0.937018	-
947	597.195	4302.54	0.848931	Landomycin D	C18684	C31H34O12	0.0597872	0.987896	0.0258379	0.828633	0.0519903	0.89585	-0.0992064	0.208167	-0.0837814	0.666084	-0.0106753	0.91061	0.0338568	0.999213	-
948	599.214	10122.2	0.886654	100-2	C12408	C31H36O12	-0.20802	0.426336	0.0534457	0.697991	0.0334608	0.933007	-0.178384	0.01914	0.0357009	0.886483	0.0361956	0.751351	-0.0142735	0.999213	-
949	599.323	11691.9	0.803888	5-Oxoavermectin ''2a'' aglycone	C11970	C34H48O9	0.106929	0.904672	-0.0386681	0.787403	-0.0910777	0.830959	-0.517656	0.00053343	0.0446498	0.830575	0.135871	0.116387	-0.0496269	0.999213	-
950	600.331	121460	0.805815	Lolitrem K	C20533	C37H47NO6	0.106764	0.826697	-0.0381066	0.767325	-0.0743727	0.893633	-0.626409	0.000845527	0.300457	0.103504	0.112982	0.391148	0.0302139	0.999213	-
951	601.266	35849.5	0.961889	Oxidized dinoflagellate luciferin	C19705	C33H38N4O7	-0.0129143	0.987896	0.0367982	0.782345	-0.0320578	0.94594	-0.183099	0.00912824	0.0882526	0.591626	0.0149319	0.917571	-0.00549065	0.999213	-
952	605.227	12758.5	0.907383	Cancentrine	C09370	C36H34N2O7	-0.0408711	0.987896	0.00238383	0.986883	-0.0391102	0.921365	-0.128801	0.0289585	-0.00293463	0.989302	0.0559911	0.512425	-0.136866	0.999213	-
953	606.074	10763.4	0.783452	UDP-N-acetyl-alpha-D-glucosamine; UDP-N-acetyl-D-galactosamine; UDP-N-acety...	C00043; C00203; C01170	C17H27N3O17P2	0.0257471	0.987896	0.0223363	0.894146	0.216366	0.280367	0.711592	0.000184011	0.00679814	0.958212	-0.229817	0.0314266	0.350502	0.999213	-
954	609.146	33821.1	0.137732	Rutin; Lucenin-2; Kaempferol 3-O-beta-D-glucosyl-(1->2)-beta-D-glucoside; K...	C05625; C10102; C12634; C16490; C17563; C19796	C27H30O16	-0.117327	0.5565	-0.0579862	0.767325	-0.0743006	0.89934	-1.93047	0.000915061	0.0996469	0.293351	-0.0154473	0.902001	-0.1434	0.893369	x
955	609.186	32370.1	NA	Atalanine	C10644	C34H30N2O9	-0.0233998	0.987896	-0.256564	0.0573468	-0.0264568	0.951998	-0.491198	0.00153516	0.0839969	0.531019	0.0226735	0.904798	0.0255454	0.999213	-
956	612.272	8946.2	-0.215474	6'''-Deamino-6'''-oxoneomycin C	C17589	C23H43N5O14	-0.017556	0.987896	0.0765368	0.565118	-0.0663343	0.89585	-0.322673	0.00619935	0.127846	0.130292	0.0109086	0.902001	0.0254891	0.999213	-
957	616.223	3624.43	0.92724	Labriformin	C08871	C31H39NO10S	0.0156624	0.991193	0.0259392	0.833197	-0.003995	0.995251	-0.106123	0.0930016	0.146844	0.144649	0.0772499	0.611406	0.0346549	0.999213	-
958	617.262	5025.08	0.942963	APC	C16542	C33H38N4O8	0.0106315	0.991193	0.0192955	0.828574	-0.0489075	0.882486	-0.203787	0.0152134	0.0537252	0.56576	0.238167	0.0647264	0.118533	0.999213	-
959	620.296	37665.5	NA	Z-Arg-Arg-NHMec	C02334	C30H39N9O6	0.0314269	0.987896	-0.0430932	0.711664	-0.02425	0.951998	0.202174	0.017937	0.107988	0.524672	0.118455	0.386278	0.103093	0.999213	-
960	623.196	9327.17	0.759024	Forsythiaside; Verbascoside; Methyl hesperidin; Magnoloside A	C10456; C10501; C17393; C17678	C29H36O15	-0.617743	0.00830191	0.0214711	0.88458	0.0216921	0.970958	-0.256275	0.0138879	0.0328178	0.864855	-0.535728	0.000908585	-0.478683	0.0466193	-
961	625.265	7606.25	0.92859	Red chlorophyll catabolite	C18022	C35H38N4O7	0.0141439	0.987896	0.0355018	0.767325	-0.0363029	0.931569	-0.188722	0.00632311	0.0367638	0.864189	0.0707963	0.607665	0.056591	0.999213	-
962	633.126	15821.1	0.83172	Actinorhodin	C06691	C32H26O14	0.00423202	0.994449	0.02319	0.84983	0.0603433	0.776841	-0.0357149	0.621489	-0.154263	0.442427	-0.0015206	0.997021	-0.0729166	0.999213	x
963	635.401	24214.3	0.848634	Argiotoxin 636	C13927	C29H52N10O6	0.0137913	0.994449	-0.0533335	0.711664	-0.208235	0.440481	-0.839772	0.000803005	0.0552568	0.864855	0.0831563	0.55093	0.0120671	0.999213	-
964	638.032	4679.38	0.136339	ADPribose 2'-phosphate	C03246	C15H24N5O17P3	0.0128685	0.994449	-0.00188641	0.992589	-0.0153407	0.963961	-0.0917979	0.14089	0.0191022	0.94369	-0.0525972	0.539883	-0.00796509	0.999213	-
965	644.307	4866.67	0.900607	Aconitine	C06091	C34H47NO11	-0.0923153	0.892623	0.0388081	0.824549	-0.0284713	0.967512	-0.237234	0.0480455	0.0868499	0.626438	0.0889699	0.427587	-0.0555993	0.999213	-
966	647.288	71224.6	NA	Gnididin	C09096	C37H44O10	-0.0655661	0.802071	-0.00522295	0.960101	0.0130049	0.970958	-0.270477	0.0732345	0.180095	0.099072	0.244167	0.0381032	0.10551	0.999213	-
967	649.095	8308.46	0.809132	Congo red	C14078	C32H22N6O6S2.	0.0243903	0.987896	0.0317272	0.860092	-0.0423298	0.879586	-0.120342	0.111664	-0.0791805	0.626438	0.065373	0.515594	0.0180323	0.999213	-
968	651.345	9333.35	NA	Metocurine	C07919	C40H48N2O6	0.00939788	0.994449	-0.260956	0.447209	0.00907441	0.990066	-0.318971	0.00787175	0.121104	0.589346	0.0377761	0.69584	0.0662706	0.999213	-
969	654.294	26494.8	0.94953	Rifamycin W	C12247	C35H45NO11	-0.00974212	0.991193	0.0167733	0.875278	-0.040027	0.92123	-0.165345	0.0110529	0.0893423	0.512336	0.161814	0.154944	-0.0141019	0.999213	-
970	665.214	42306.4	0.644007	Glycogen; Stachyose; Cellotetraose; Maltotetraose; Isolychnose; 1,3-alpha-D...	C00182; C01613; C02013; C02052; C03989; C04861; C08242; C08248	C24H42O21	-0.0043906	0.994449	0.0397478	0.681375	0.0315944	0.916066	-0.326898	6.68934e-05	-0.109754	0.524672	0.0496647	0.610156	0.0227847	0.999213	-
971	669.422	18632.8	NA	Monensin	C06693	C36H62O11	0.162241	0.493836	-0.0605876	0.729871	-0.17708	0.340205	-0.84054	5.39592e-05	0.0880085	0.643781	-0.00570125	0.963001	-0.00581698	0.999213	-
972	672.338	7571.42	0.869796	Veratridine; Bikhaconitine	C06544; C08664	C36H51NO11	-8.05525e-05	0.999369	0.055656	0.733814	-0.017922	0.990066	-0.36246	0.0216523	0.239161	0.0942488	0.0790798	0.512425	-0.00652582	0.999213	-
973	679.425	9297.79	0.859398	13-Sophorosyloxydocosanoic acid	C18191	C34H64O13	-0.0923973	0.927816	0.00373802	0.986889	-0.190284	0.390067	-0.844317	0.000684396	0.0165951	0.951994	0.0634884	0.545475	0.0779481	0.999213	-
974	682.289	4165.82	0.913091	27-O-Demethylrifamycin SV	C14727	C36H45NO12	-0.127847	0.784037	-0.0719494	0.522619	-0.0242104	0.951998	-0.198863	0.00374511	0.113368	0.51266	0.112005	0.301647	0.0971908	0.981279	-
975	686.042	3167.93	0.242498	UDP-N-acetyl-alpha-D-glucosamine 3'-phosphate	C20245	C17H28N3O20P3	-0.0286066	0.987896	0.0590937	0.753422	0.0257307	0.943585	0.038409	0.656428	0.0215327	0.905804	-0.000355738	1	0.0203595	0.999213	-
976	693.195	3727.33	0.808543	Dexylosylpradimicin C	C06785	C34H34N2O14	-0.0350354	0.987896	0.0352534	0.810939	0.0390837	0.928586	-0.0885272	0.35643	0.0622002	0.725073	-0.0266083	0.772952	-0.0773558	0.999213	-
977	696.302	5732.51	0.943478	Rifamycin	C12044	C37H47NO12	-0.0124909	0.991193	0.0339569	0.730554	-0.0313706	0.938197	-0.145145	0.0470944	0.153295	0.33389	0.025903	0.68456	-0.0465998	0.999213	-
978	703.386	9803.43	0.220025	Voacamine	C09252	C43H52N4O5	0.111811	0.774257	-0.0493335	0.653955	-0.0904565	0.680165	-0.498494	0.000724868	0.0645897	0.703451	0.0583655	0.573566	0.0746791	0.999213	-
979	709.343	17291.2	0.750655	k-Strophanthin-beta; Boivinide A	C16820; C17526	C36H54O14	0.0299477	0.987896	0.0848263	0.692534	0.155321	0.809523	0.0830041	0.510102	0.0203811	0.913812	0.00576633	0.956176	-0.045049	0.999213	-
980	711.325	341947	NA	Convalloside	C19986	C35H52O15	0.0103987	0.991193	0.029438	0.875278	0.0996303	0.893844	-0.221567	0.097638	0.200823	0.174619	0.0522881	0.534208	0.0452696	0.999213	-
981	711.359	19607.4	0.956625	Digitalin	C08862	C36H56O14	-0.0631161	0.926338	0.0366208	0.746207	-0.0146374	0.980385	-0.178297	0.0372944	0.0195565	0.886483	0.0618798	0.391148	0.0246368	0.999213	-
982	716.523	8892.84	0.189099	1-Hexadecanoyl-2-(9Z-octadecenoyl)-sn-glycero-3-phosphoethanolamine	C13877	C39H76NO8P	0.153103	0.46575	-0.072503	0.61458	-0.036586	0.890624	-0.135166	0.245931	2.27869	0.000309098	1.09023	0.000825682	0.25257	0.704559	-
983	719.306	15297.3	NA	Ritonavir	C07240	C37H48N6O5S2	-0.0254434	0.987896	-0.0239084	0.722169	-0.0266691	0.938197	-0.13495	0.0146481	0.109641	0.342087	0.0676102	0.218155	-0.058112	0.999213	-
984	721.394	12861.3	-0.0436251	Myxochromide S1	C15714	C38H54N6O8	-0.0433769	0.927816	-0.000187311	0.99913	-0.0777782	0.822703	-0.339918	0.0031934	0.0569624	0.841345	-0.0703445	0.352102	-0.00733723	0.999213	-
985	723.057	4480.4	0.140198	Adenylated molybdopterin	C19848	C20H26N10O12P2S2	0.0352743	0.987896	-0.0473175	0.814737	-0.0252337	0.931569	-0.0689209	0.589643	-0.0102015	0.952605	0.0337395	0.593455	-0.0201208	0.999213	-
986	725.344	26359.2	0.938047	Adiantifoline	C09323	C42H50N2O9	0.0108467	0.991193	0.0170668	0.909668	0.00393565	0.995251	-0.218377	0.053145	0.0626132	0.61222	0.0670446	0.493742	0.0816279	0.999213	-
987	738.818	15345.2	NA	1-Diphosinositol pentakisphosphate; 5-PP-InsP5	C11174; C11526	C6H19O27P7	-0.0636459	0.789956	-0.0568299	0.480938	-0.0243793	0.92123	-0.0737471	0.123673	0.147558	0.190041	-0.0274767	0.839996	-0.0213012	0.999213	-
988	741.188	31017.3	0.711445	Quercetin 3-(2G-xylosylrutinoside)	C10175	C32H38O20	0.0220218	0.987896	0.00444939	0.969443	0.0152735	0.972297	-0.236579	0.00907782	0.0144561	0.942667	0.0824646	0.364212	-0.0600229	0.999213	-
989	745.418	6413.56	0.809468	Avermectin A2b monosaccharide; Avermectin B2a monosaccharide	C11958; C11973	C41H62O12	-0.0133868	0.994449	-0.0482247	0.73643	-0.0960666	0.787869	-0.498334	0.000684396	0.0913378	0.572026	0.010538	0.928874	0.0750155	0.999213	-
990	747.518	3867.22	0.498786	1-Hexadecanoyl-2-(9Z-octadecenoyl)-sn-glycero-3-phospho-sn-glycerol	C13883	C40H77O10P	0.394053	0.392344	0.00853065	0.992589	2.4287	0.0278071	1.83335	0.000184011	0.164884	0.257575	0.0977851	0.728748	-0.0621362	0.999213	-
991	748.296	16657.1	NA	3'-N-Debenzoyltaxol	C16524	C40H47NO13	0.0598557	0.892623	-0.0699873	0.583612	0.0250887	0.946345	-0.093917	0.149658	0.151115	0.217236	-0.0180838	0.874655	0.0253355	0.999213	-
992	760.346	1711.24	NA	Lividomycin A	C17707	C29H55N5O18	-0.0677922	0.761707	0.0151818	0.836781	-0.0227946	0.931569	-0.1864	0.00354737	-0.00261872	0.990504	0.0196126	0.902001	0.0163982	0.999213	-
993	760.348	9560.66	-0.273994	Lividomycin A	C17707	C29H55N5O18	-0.062336	0.833862	0.0184642	0.817094	-0.0535464	0.776841	-0.149672	0.0107085	0.0113292	0.962535	0.0442341	0.736119	0.0358866	0.999213	-
994	771.199	11777.8	0.0450834	Kaempferol 3-sophorotrioside	C12635	C33H40O21	-0.126826	0.533642	-0.361288	0.00330491	-0.0416085	0.92123	-0.423399	0.00023742	0.0689376	0.31762	0.102606	0.207409	0.0485383	0.999213	x
995	775.27	3150	0.824061	Formylmethanofuran	C01001	C35H44N4O16	-0.0510012	0.96593	-0.0164918	0.88458	0.0252833	0.948731	-0.0972877	0.113877	-0.0132872	0.95234	0.0300449	0.902001	0.0637827	0.999213	-
996	777.341	7724.11	NA	Bis(glutathionyl)spermine disulfide	C16564	C30H54N10O10S2	-0.0782264	0.868757	-0.0511772	0.447209	0.00416729	0.99159	-0.141272	0.0422984	0.0796033	0.681653	0.0720802	0.372737	0.0940754	0.999213	-
997	784.411	4729.25	0.862635	Leucomycin A8	C14061	C39H63NO15	-0.0178852	0.987896	-0.00689954	0.96644	-0.036494	0.946868	-0.278188	0.0145591	-0.0864276	0.605068	-0.0461784	0.435552	-0.117697	0.999213	-
998	787.31	9115.33	-0.270672	Phalloidin	C08439	C35H48N8O11S	-0.0484307	0.848664	-0.0298407	0.730554	-0.00797544	0.990066	-0.133786	0.064509	0.104712	0.442427	0.0540266	0.588959	0.0836618	0.999213	-
999	788.985	7302.59	NA	P1,P4-Bis(5'-uridyl) tetraphosphate	C06198	C18H26N4O23P4	-0.0798854	0.904672	0.0354571	0.810939	0.0449317	0.89585	-0.0256458	0.765407	0.0063728	0.979639	-0.0950366	0.276068	0.0655583	0.999213	-
1000	792.415	3704.52	NA	Protoveratrine A	C10815	C41H63NO14	-0.268559	0.46575	-0.0537947	0.927958	0.105727	0.912889	-0.237887	0.43048	-0.00310574	0.990951	-0.0120853	0.870105	-0.0113742	0.999213	-
1001	807.398	6254.7	NA	Leurosine	C09219	C46H56N4O9	0.0720768	0.927816	0.0401006	0.712455	0.00196444	0.996123	-0.188508	0.014288	0.0739497	0.833322	0.0142509	0.930475	0.0445157	0.999213	-
1002	807.4	34335.6	0.941613	Leurosine	C09219	C46H56N4O9	-0.075253	0.904672	0.0497041	0.671661	0.000233685	0.999859	-0.201456	0.00978622	-0.0189583	0.920546	-0.0325714	0.72247	-0.00669304	0.999213	-
1003	808.317	5801.07	NA	Aclacinomycin Y	C18639	C42H51NO15	-0.0761362	0.486248	0.046388	0.732997	0.0466998	0.89585	-0.113323	0.15517	0.018075	0.94428	0.0121342	0.947361	0.00702398	0.999213	-
1004	821.377	5898.31	0.90846	Catharine	C09129	C46H54N4O10	0.0032097	0.994449	0.00140047	0.992589	-0.0447891	0.908066	-0.141214	0.029888	0.121917	0.350089	-0.101333	0.388495	0.01333	0.999213	-
1005	821.398	2710.58	-0.234946	Rifampicin	C06688	C43H58N4O12	-0.0159635	0.987896	-0.0152235	0.919434	-0.0251747	0.951998	-0.189953	0.00846676	0.0173017	0.951994	-0.029075	0.63176	-0.0195879	0.999213	-
1006	823.391	13613.7	0.908908	Vincristine; Vincristine sulfate	C07204; C13974	C46H56N4O10; C46H56N4O10.	-0.00718398	0.994449	-0.0308391	0.776023	-0.0187347	0.970012	-0.230459	0.000184011	0.114145	0.504339	-0.0168991	0.916948	0.0331106	0.999213	-
1007	823.448	11873.1	0.915026	Yiamoloside B	C08990	C43H68O15	0.0319869	0.987896	-0.00409845	0.978328	-0.00559862	0.995251	-0.172123	0.061512	-0.0537551	0.864293	-0.140982	0.190636	-0.0999553	0.999213	-
1008	827.267	4016.9	0.380212	Amylopectin; Cellopentaose; Verbascose	C00317; C06218; C08252	C30H52O26	0.031493	0.987896	0.0203495	0.810939	0.0557218	0.822703	-0.187808	0.00270044	-0.0153308	0.901562	0.0951575	0.263338	0.0204722	0.999213	-
1009	835.43	4428.18	0.955603	Acanthifolicin	C20006	C44H68O13S	-0.0450685	0.986291	0.0357939	0.814737	-0.0228692	0.970958	-0.210172	0.0291146	-0.0577763	0.864189	-0.111199	0.203871	-0.0136724	0.999213	-
1010	841.328	22637.9	NA	Landomycin J	C18824	C43H54O17	0.0440856	0.987896	-0.0160703	0.875278	0.00786586	0.990066	-0.0857643	0.123875	-0.0364772	0.846918	0.0032442	0.973908	-0.0125398	0.999213	-
1011	850.472	4000.72	NA	Chivosazole B	C15729	C48H69NO12	-0.00140402	0.995507	0.0157449	0.919434	-0.0582829	0.837216	-0.286737	0.00938765	0.0990325	0.604823	-0.108678	0.195854	0.00881661	0.999213	-
1012	867.475	3186.07	0.904842	Dioscin; Desglucomusennin; Isoastragaloside I; Astragaloside I	C08897; C08940; C17793; C17797	C45H72O16	0.109033	0.731766	0.0196938	0.87632	-0.045333	0.92123	-0.0126855	0.85202	-0.0402639	0.886483	-0.0725253	0.557282	0.0646672	0.999213	-
1013	868.293	4955.17	NA	1,3-alpha-D-Mannosyl-(1,2-N-acetyl-alpha-D-glucosaminyl)-1,2-alpha-D-mannos...	C04923	C32H55NO26	-0.0789321	0.927816	0.0469698	0.697991	-0.0108574	0.990066	-0.0276543	0.596619	0.0985659	0.545166	0.0889027	0.428859	-0.0639849	0.999213	-
1014	869.564	5337.73	0.861226	X-206	C15847	C47H82O14	-0.147268	0.607269	-0.0635011	0.483308	-0.40522	0.0575428	-0.826439	0.000915061	-0.0675262	0.795186	-0.0485494	0.723818	0.0957168	0.999213	-
1015	873.464	7011.03	0.835464	Pectenotoxin 1	C16871	C47H70O15	-0.0337811	0.987896	0.014042	0.941891	-0.0136928	0.990066	-0.271664	0.0146586	-0.0426032	0.84978	-0.174638	0.0656647	-0.0537616	0.999213	-
1016	877.434	5755.03	NA	Hydrogenobyrinate a,c diamide	C06503	C45H62N6O12	-0.046743	0.987896	0.00273188	0.982698	0.0461176	0.931569	-0.152459	0.0627334	-0.0305092	0.864189	-0.125059	0.131719	0.0128426	0.999213	-
1017	894.294	26820.1	-0.499029	Coumermycin D	C12480	C43H49N3O18	0.0234272	0.987896	0.0431136	0.726457	0.042987	0.912889	0.0607552	0.414717	0.0304863	0.879145	0.151134	0.342138	0.113094	0.999213	-
1018	897.907	39858.2	0.657033	Reactive black 5	C16001	C26H21N5O19S6.	-0.0222648	0.987896	-0.12108	0.232651	-0.00741907	0.973073	0.0120215	0.804635	-0.0627249	0.759223	-0.0566734	0.421036	0.0112826	0.999213	-
1019	909.312	13549	NA	3''-Adenylylstreptomycin	C03462	C31H51N12O18P	0.0116389	0.994449	0.00111732	0.996863	0.0545539	0.844062	-0.000511784	0.994332	0.0354004	0.886483	0.00260798	0.995665	-0.00685768	0.999213	-
1020	911.499	8404.73	0.887703	Soyasaponin II; Akeboside Stf	C12081; C17546	C47H76O17	0.125063	0.705239	-0.00176605	0.991658	0.00314605	0.996123	-0.200709	0.0809637	-0.0361477	0.86802	-0.141447	0.207052	0.0236835	0.999213	-
1021	921.343	16342.3	NA	Precorrin 5	C06416	C45H54N4O17	-0.0412462	0.987896	-0.0137504	0.913511	0.0637473	0.82039	-0.0851828	0.173615	0.0455331	0.741908	-0.0246913	0.83334	0.0353905	0.999213	-
1022	924.415	71027.1	0.839461	Cyanopeptolin S	C15743	C40H63N9O14S	-0.124179	0.640858	-0.00555933	0.953259	-0.00121799	0.996123	-0.0726006	0.130954	-0.0781677	0.642285	-0.0692241	0.604773	0.0483341	0.999213	-
1023	936.343	1.67241e+06	-0.389767	Cobyrinate c-monamide	C19724	C45H60CoN5O13	-0.0898119	0.635186	0.00803203	0.960693	0.00657503	0.990066	-0.00197849	0.960944	-0.00406796	0.981783	0.00476857	0.975271	0.01803	0.999213	-
1024	951.447	106609	NA	Anabaenopeptilide 90A	C15691	C46H64N8O14	0.0112551	0.994449	0.00391617	0.969443	-0.0306145	0.94594	-0.0703991	0.305228	0.0201891	0.931402	-0.167518	0.2685	0.0194218	0.999213	-
1025	951.448	64910.9	0.881466	Anabaenopeptilide 90A	C15691	C46H64N8O14	0.00159941	0.994449	0.00391617	0.969443	-0.0208227	0.964335	-0.0705407	0.304573	0.0201891	0.931402	-0.171292	0.251032	-0.0165447	0.999213	-
1026	951.495	91387.8	NA	Microcystin RA	C19996	C46H68N10O12	0.0405174	0.987896	0.0683504	0.71702	0.0471099	0.943585	-0.129773	0.258798	-0.0404292	0.846918	-0.0460044	0.799838	-0.0416424	0.999213	-
1027	961.369	18087.5	0.695049	3A-Deolivosylpremithramycin B	C18710	C47H62O21	-0.0660936	0.984399	0.0249004	0.851043	0.00104741	0.996123	0.0677271	0.143496	0.026388	0.875233	-0.0875622	0.421934	0.0168473	0.999213	-
1028	973.586	4563.72	0.341212	Megalomicin C2	C11988	C49H86N2O17	-0.0392807	0.987896	0.0599065	0.852233	-0.253642	0.72641	-0.432336	0.0576185	-0.0937251	0.886483	0.00248393	0.989146	-0.113904	0.999213	-
1029	973.653	3227.09	NA	1-Archaetidyl-1D-myo-inositol 3-phosphate	C20642	C49H100O14P2	-0.0826768	0.634019	0.042955	0.815129	0.027781	0.951998	-0.1339	0.172352	-0.0248726	0.887062	-0.090908	0.438415	0.0462321	0.999213	-
1030	975.369	22685.5	0.668383	Crocin	C08589	C44H64O24	0.00904921	0.994449	-0.0271221	0.814737	0.0873538	0.674266	0.0570114	0.205071	0.0403707	0.848086	-0.0883239	0.445316	0.0251424	0.999213	-
1031	989.319	192076	-0.201667	Maltohexaose; Cellohexaose; alpha-Galactosyl-(1-6)-alpha-galactosyl-(1-6)-a...	C01936; C06217; C08238	C36H62O31	-0.0752275	0.833862	0.0105913	0.953259	0.0819824	0.80308	-0.061068	0.196756	0.00975689	0.951994	0.057223	0.638388	0.0299704	0.999213	-
