# Supplementary material for: Disentangling metabolic functions of bacteria in the honey bee gut
Source: PLoS Biol. 2017 Dec 12;15(12):e2003467. doi: 10.1371/journal.pbio.2003467 (PMC5726620; doi:10.1371/journal.pbio.2003467)
Supplement: S10 Data — (XLSX) [file pbio.2003467.s010.xlsx]

## Sheet: injections
dsIdx

## Sheet: ions
ionIdx

## Sheet: annotation
ionIdx

## Sheet: intensities
099 / S_mic_T72_3_G_mic
