# Supplementary material for: Disentangling metabolic functions of bacteria in the honey bee gut
Source: PLOS journal article supplement (doi:10.1371/journal.pbio.2003467), 2017-12-12
Supplement: S11 (10.1371/journal.pbio.2003467.s011) [file journal.pbio.2003467.s011]

log2(fold change)

### G conditioning

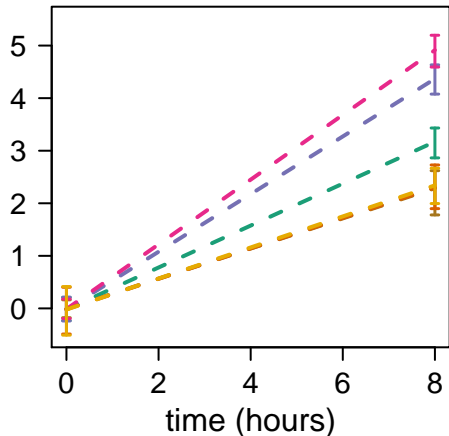

### S growth

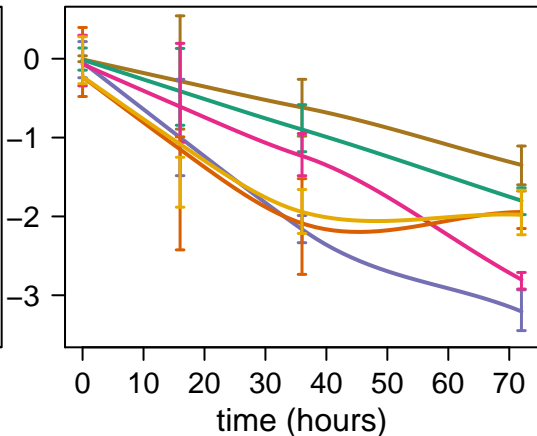

87.0087

Pyruvate\*

117.019

Succinate\*

117.055

5-Hydroxypentanoate\*

131.071

D-2-Hydroxyisocaproate\*

165.056

3-(2-Hydroxyphenyl)propanoate\*

269.088

6-Hydroxyl-1,6-dihydropurine ribonucleotide
