# Supplementary material for: Disentangling metabolic functions of bacteria in the honey bee gut
Source: PLOS journal article supplement (doi:10.1371/journal.pbio.2003467), 2017-12-12

Metabolome PCA ann. ions, log2

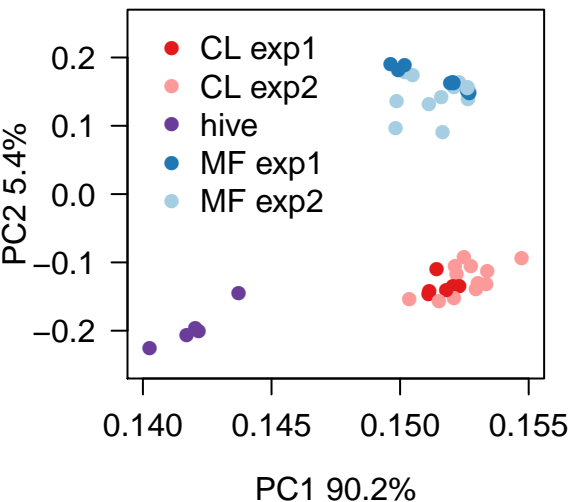

Metabolome PCA ann. ions, Z-score

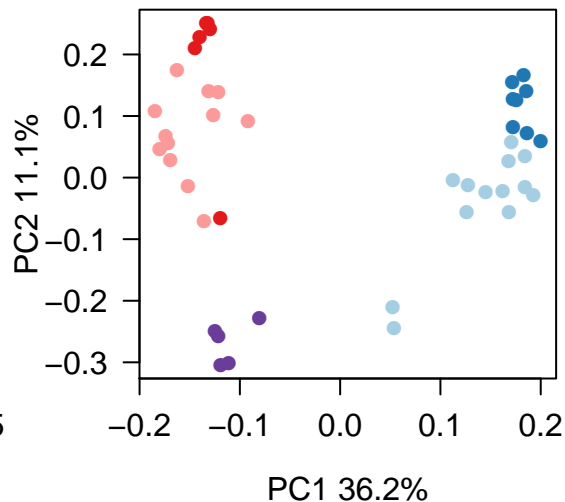

Metabolome PCA sig. ions, log2

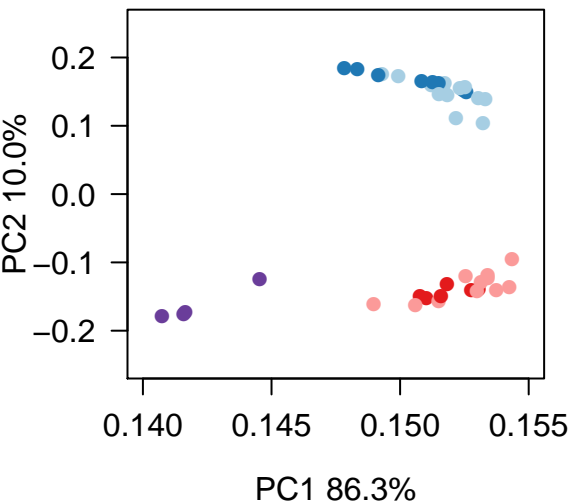

Metabolome PCA sig. ions, Z-score

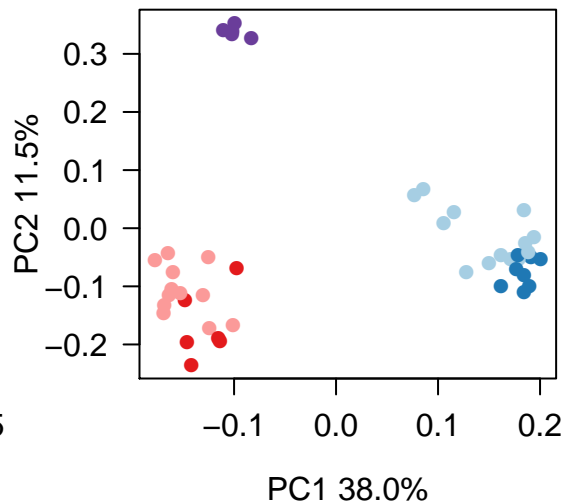

Supplement: S11 (10.1371/journal.pbio.2003467.s011) [file journal.pbio.2003467.s011]
