# Supplementary figures and images for: Disentangling metabolic functions of bacteria in the honey bee gut
Source: PLOS journal article supplement (doi:10.1371/journal.pbio.2003467), 2017-12-12

**B PE**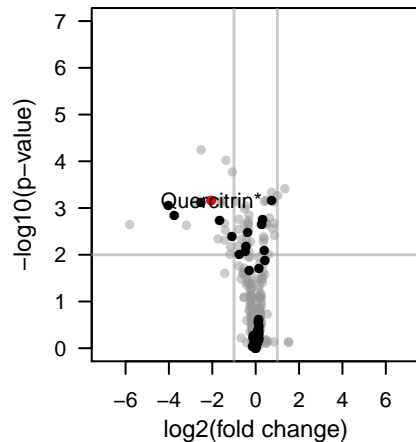**F5 PE**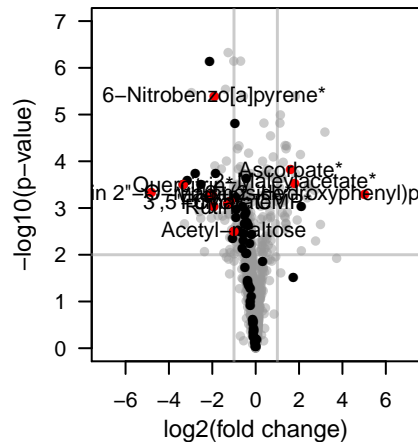**F4 PE**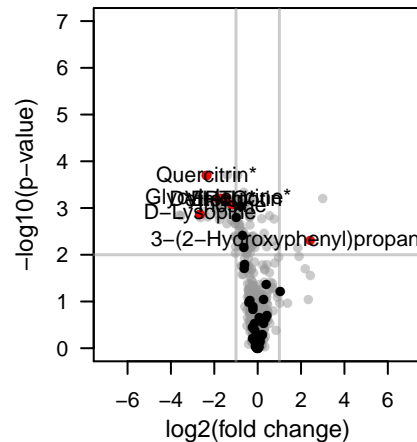**S PE**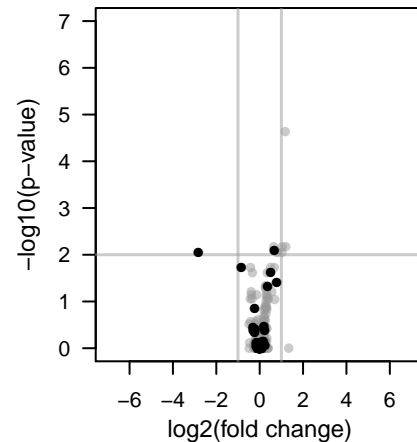**A1 PE**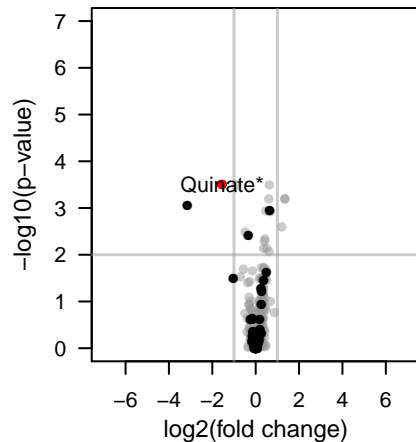**Fp PE**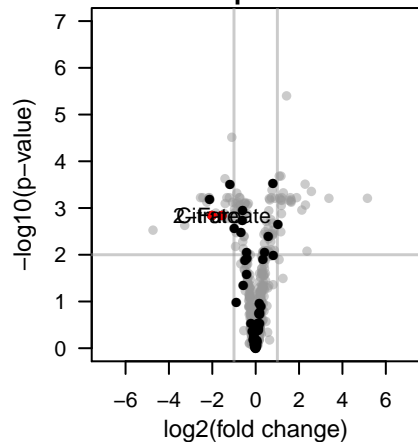**G PE**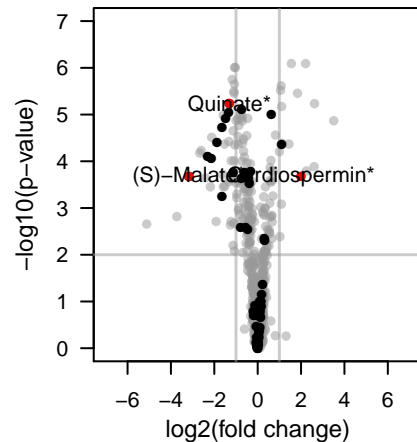

Supplement: S11 (10.1371/journal.pbio.2003467.s011) [file journal.pbio.2003467.s011]

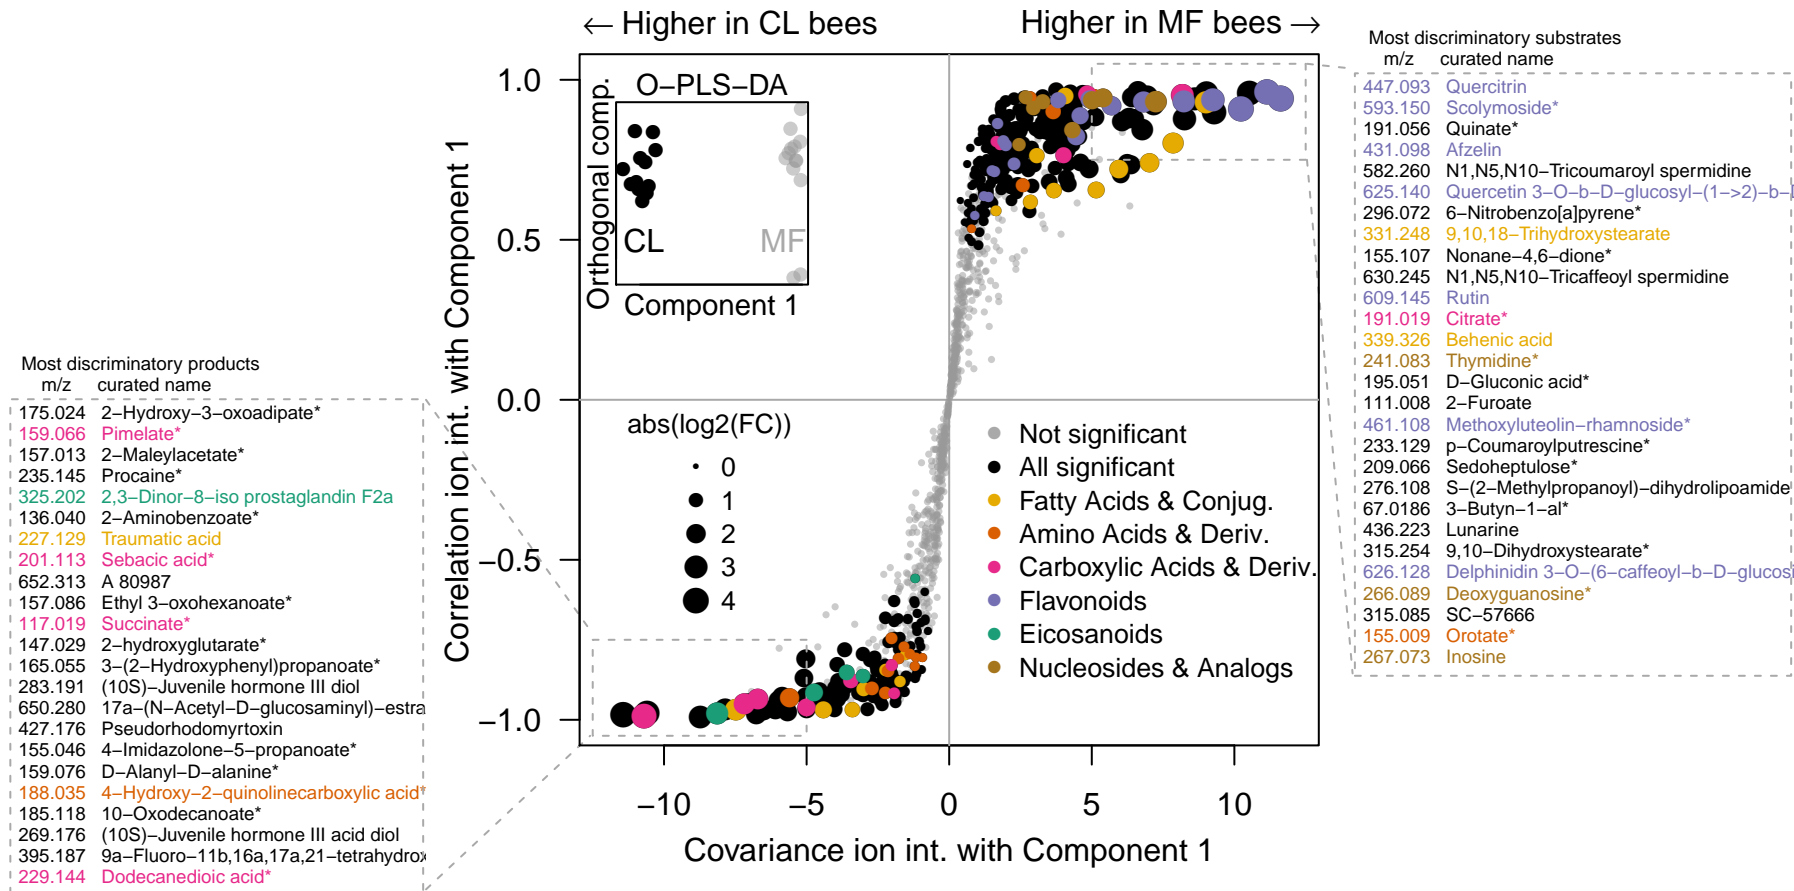

Supplement: S11 (10.1371/journal.pbio.2003467.s011) [file journal.pbio.2003467.s011]

log2(FC) CL:MF

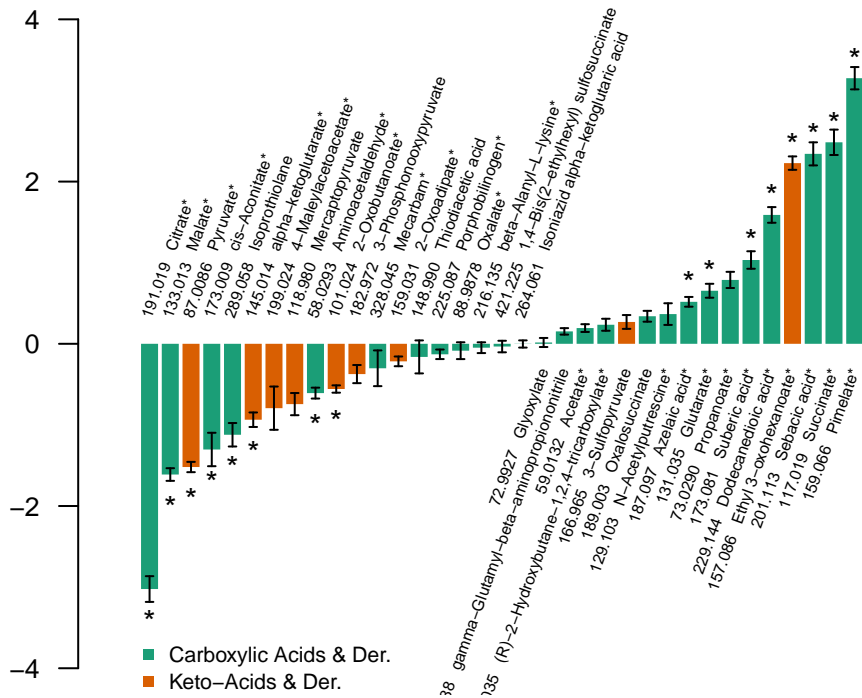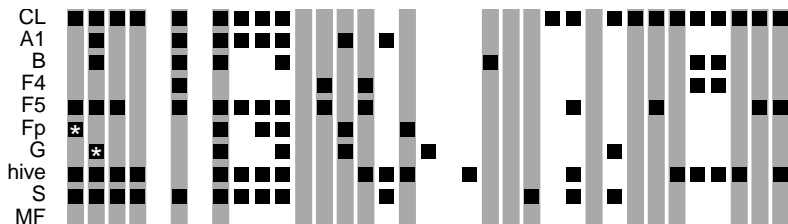

Supplement: S11 (10.1371/journal.pbio.2003467.s011) [file journal.pbio.2003467.s011]

log2(FC) CL:MF

0  
-1  
-2  
-3  
-4

hydroxy  
phenol

CL  
A1  
B  
F4  
F5  
Fp  
G  
ve  
S  
MF

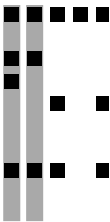

Supplement: S11 (10.1371/journal.pbio.2003467.s011) [file journal.pbio.2003467.s011]

**B PE**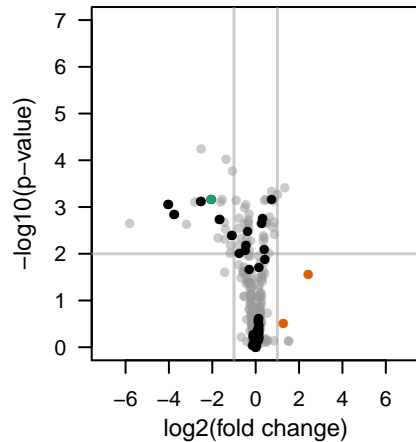**F5 PE**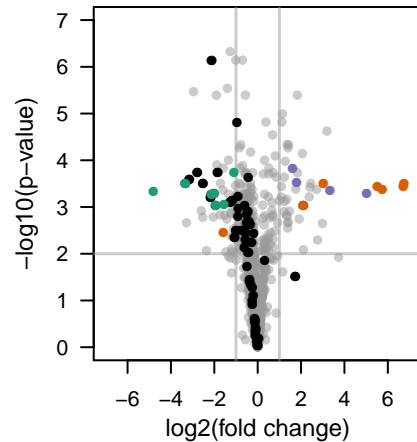**F4 PE**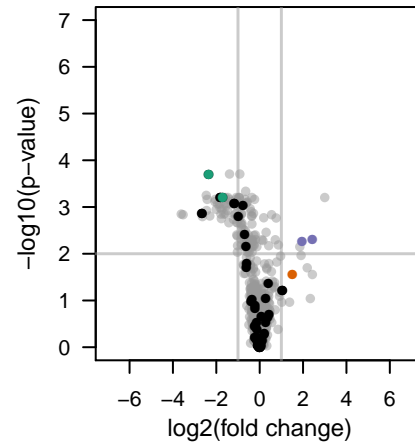**S PE**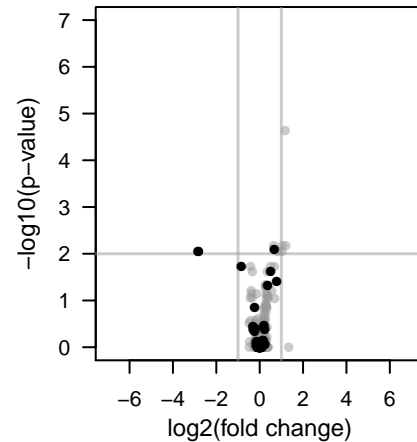**A1 PE**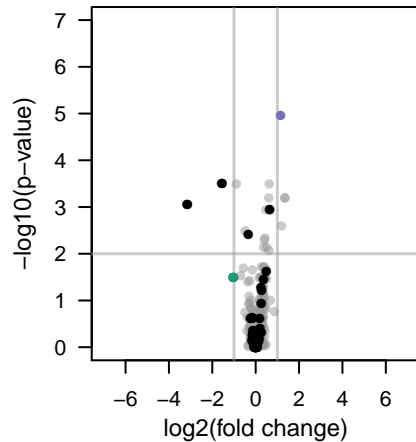**Fp PE**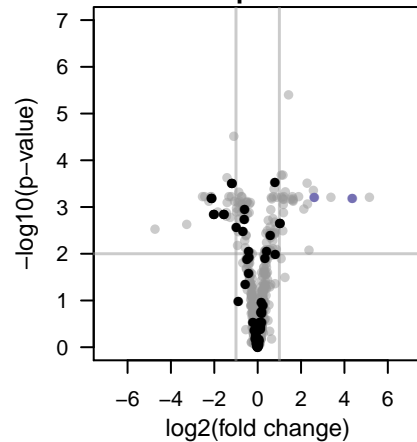**G PE**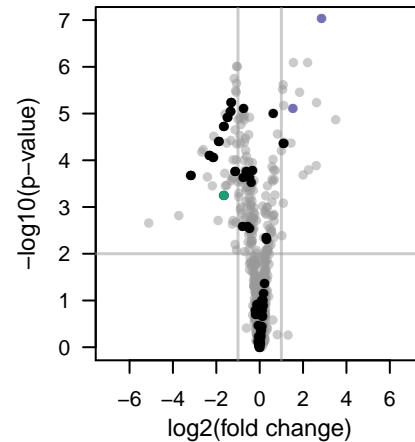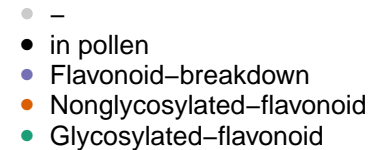

Supplement: S11 (10.1371/journal.pbio.2003467.s011) [file journal.pbio.2003467.s011]

-  Alpha
-  Bifido
-  CL
-  Firm
-  Firm
-  Gamma
-  Gamma
-  hive
-  MF
-  Beta-proteo

Supplement: S11 (10.1371/journal.pbio.2003467.s011) [file journal.pbio.2003467.s011]

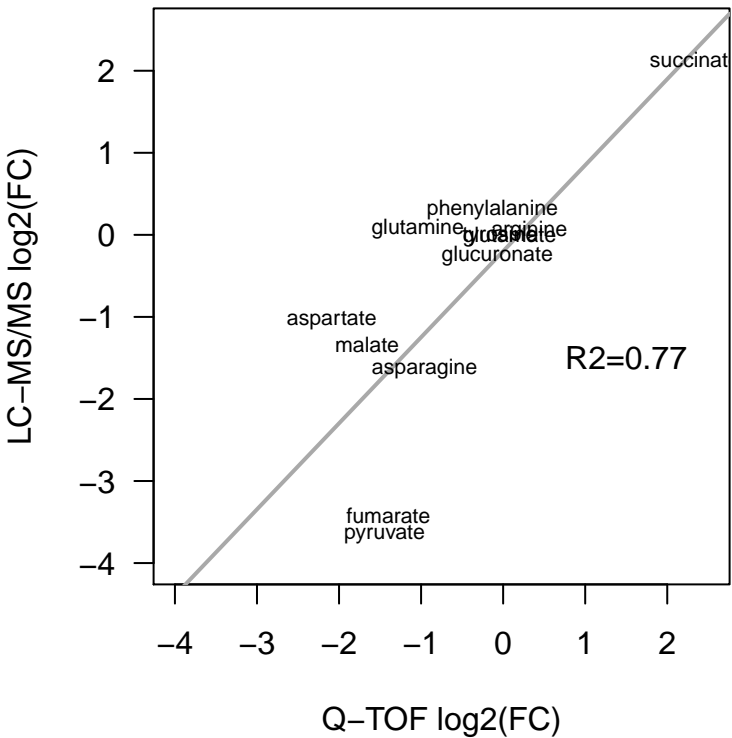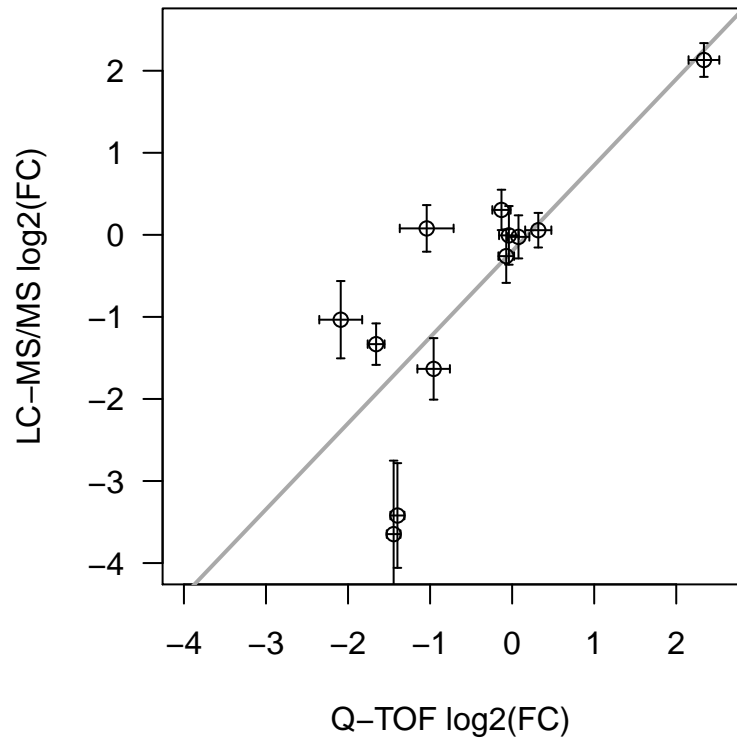

Supplement: S11 (10.1371/journal.pbio.2003467.s011) [file journal.pbio.2003467.s011]

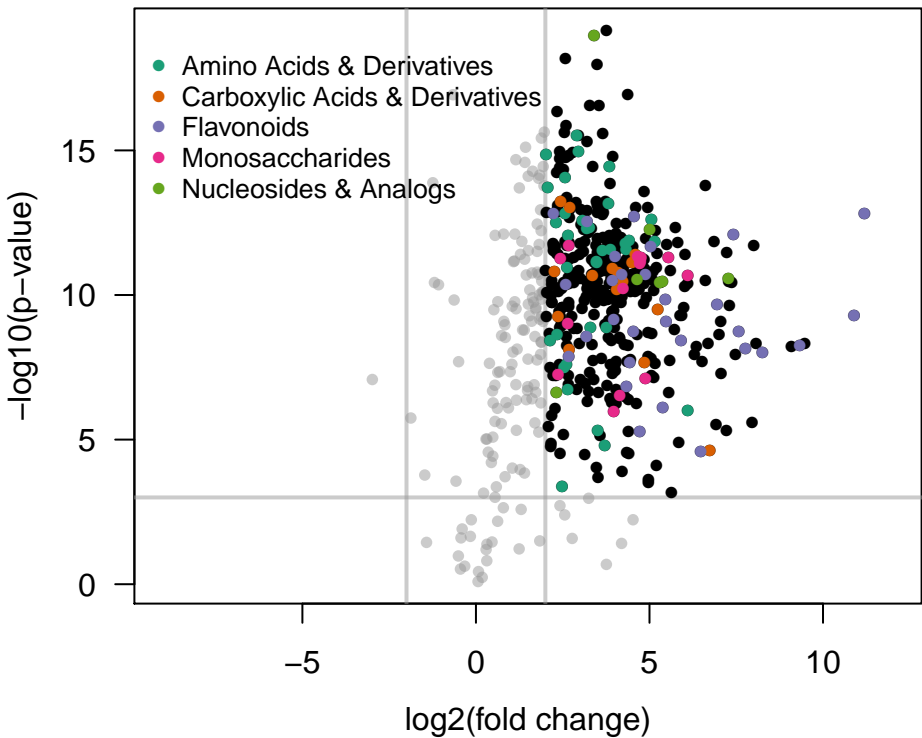

Supplement: S11 (10.1371/journal.pbio.2003467.s011) [file journal.pbio.2003467.s011]

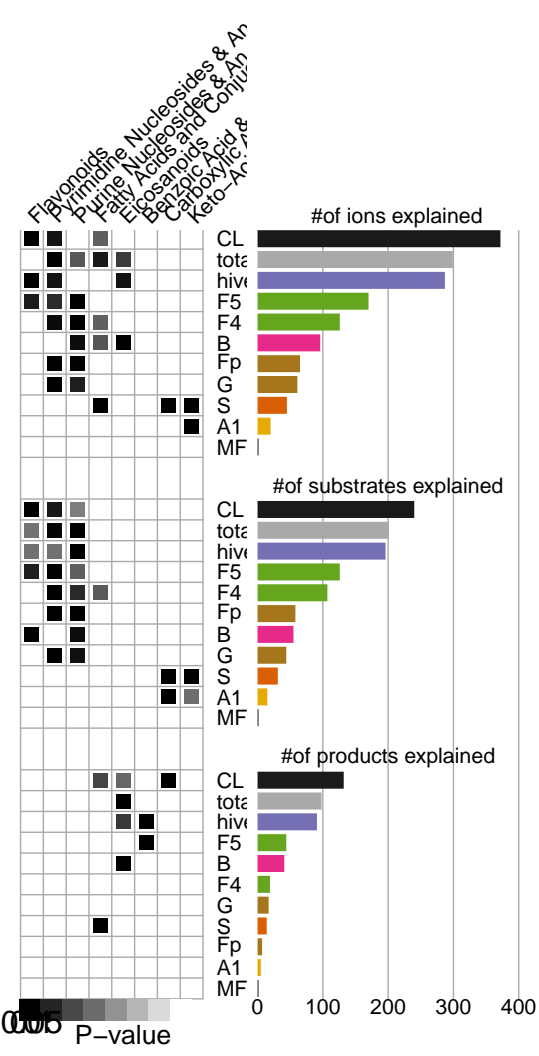

Supplement: S11 (10.1371/journal.pbio.2003467.s011) [file journal.pbio.2003467.s011]

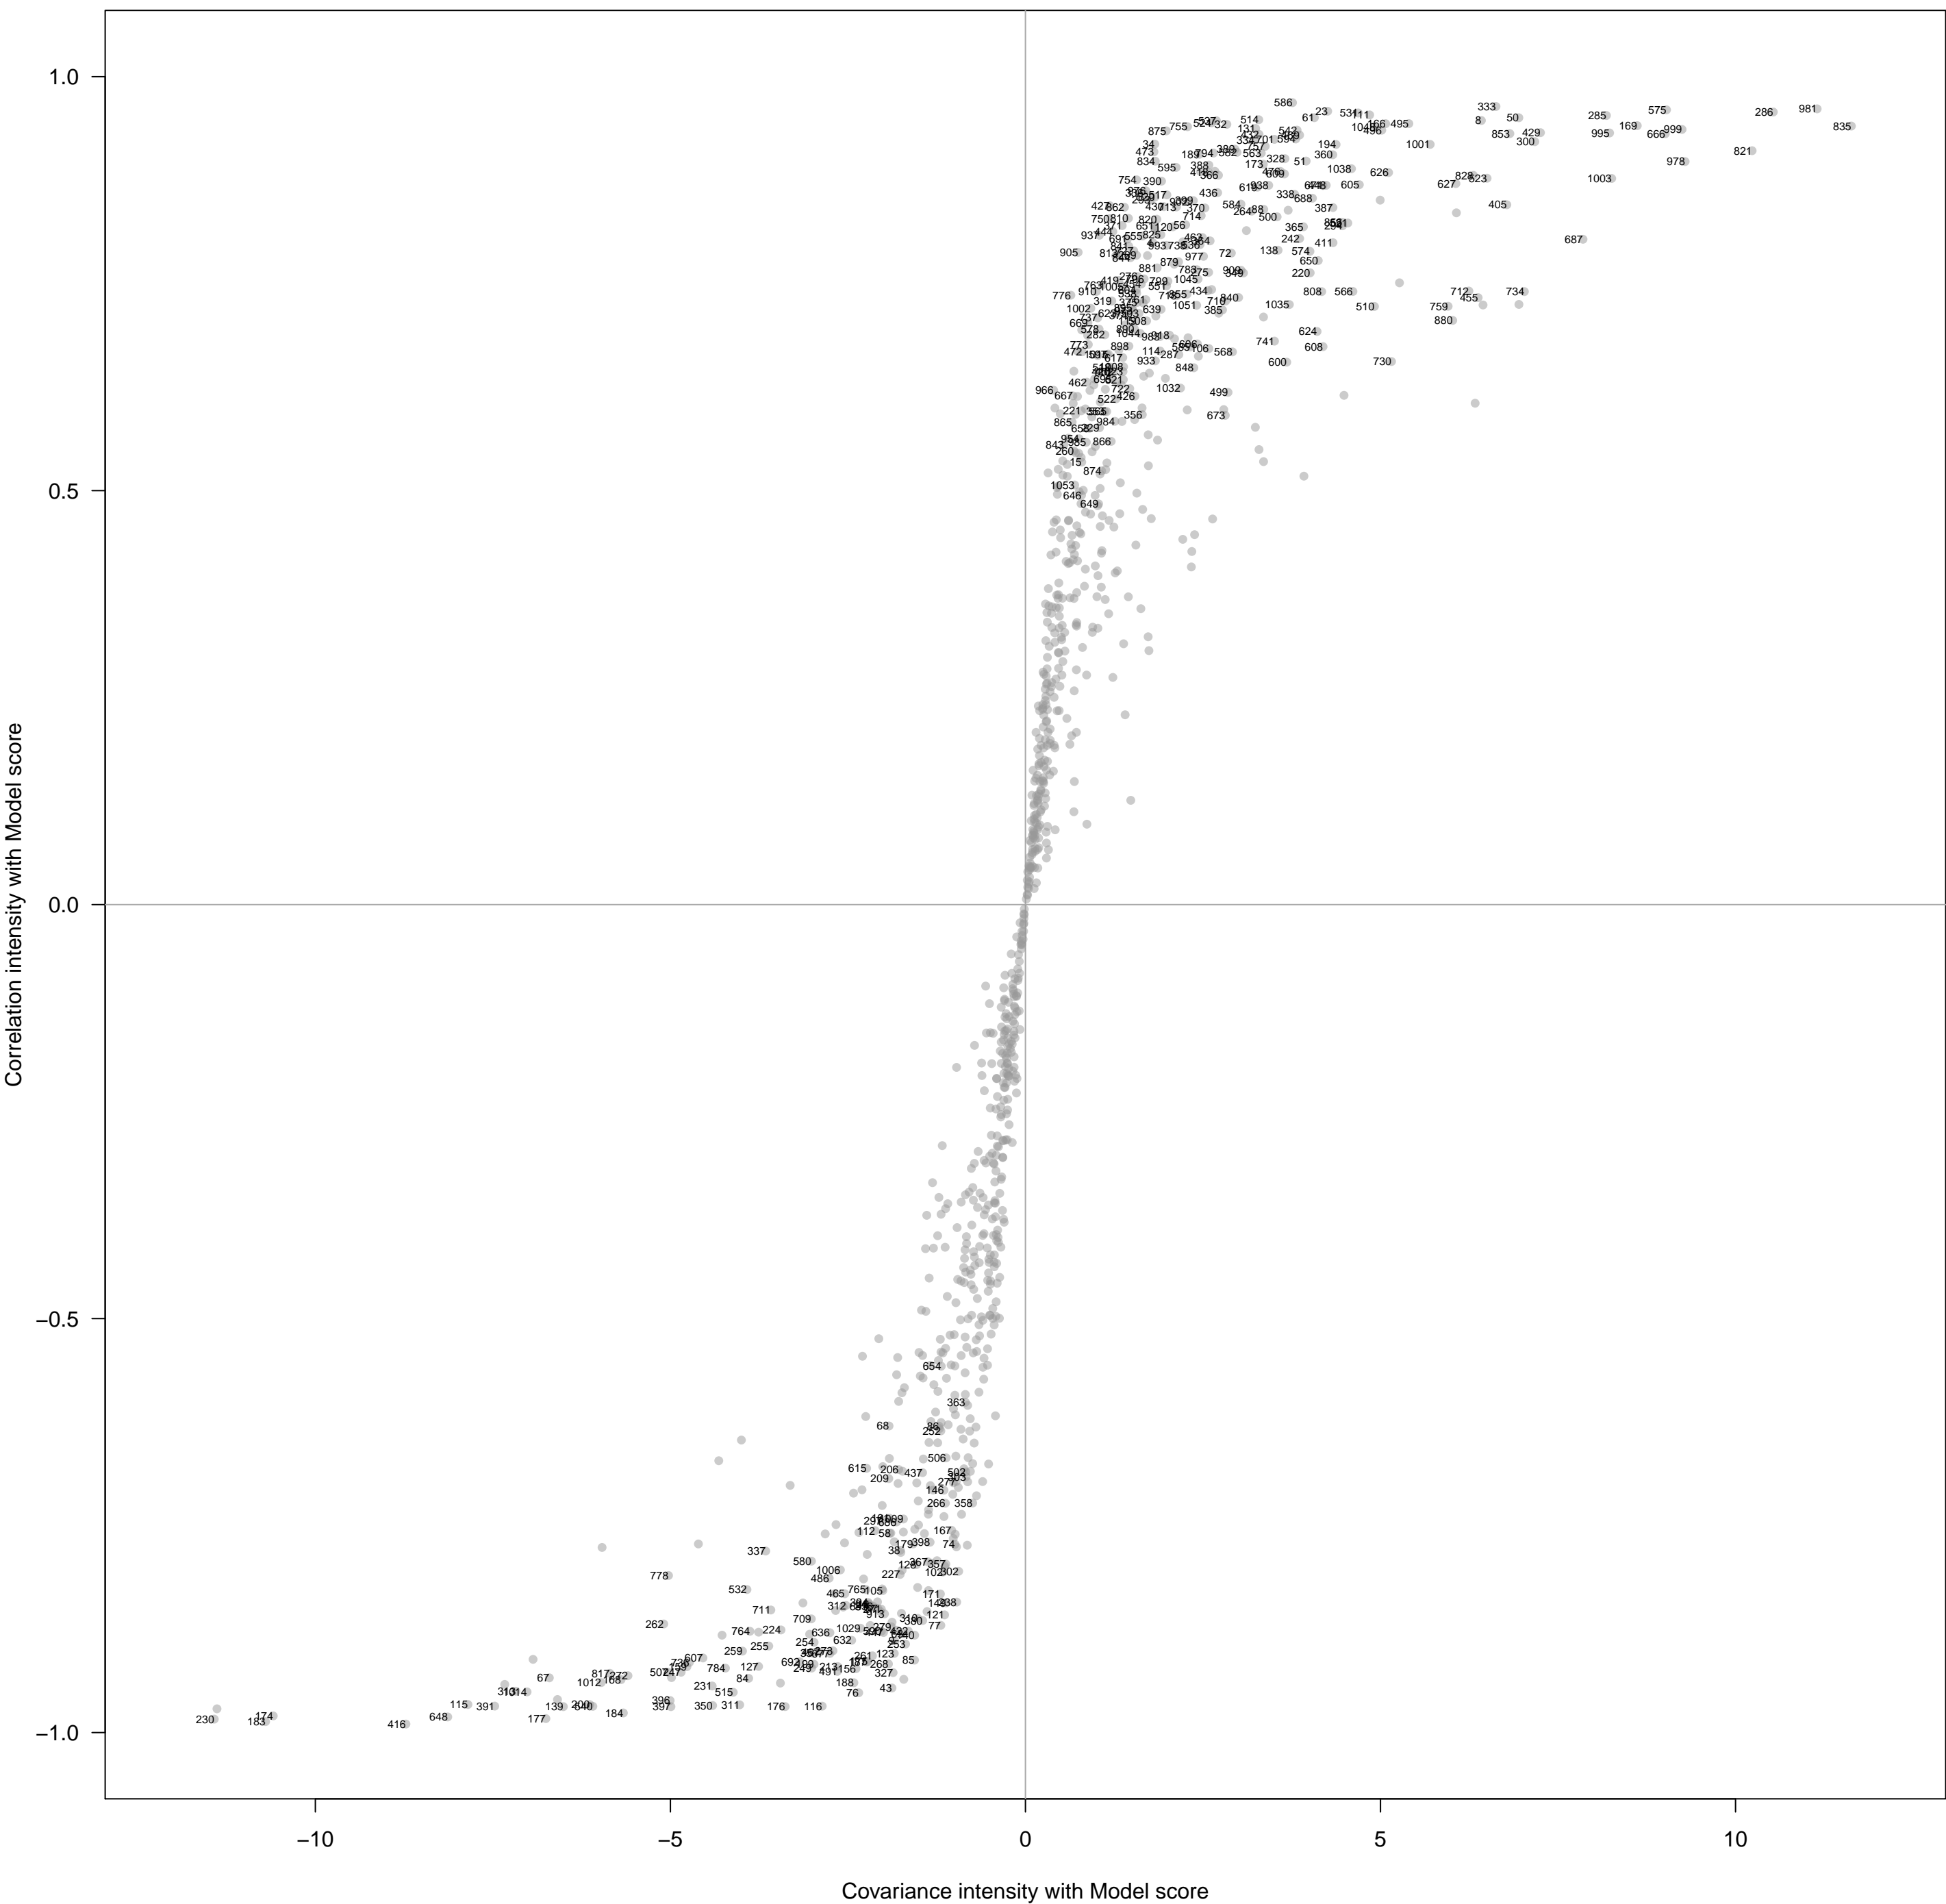

Supplement: S11 (10.1371/journal.pbio.2003467.s011) [file journal.pbio.2003467.s011]

log<sub>2</sub>(FC) CL:MF4  
2  
0  
-2  
-4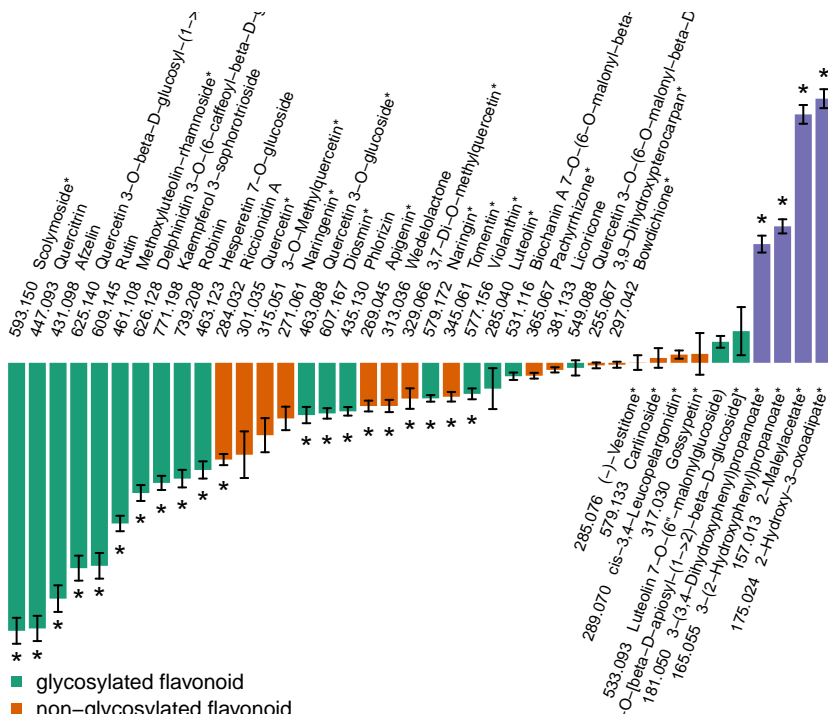CL  
A1  
B  
F4  
F5  
Fp  
G  
hive  
S  
MF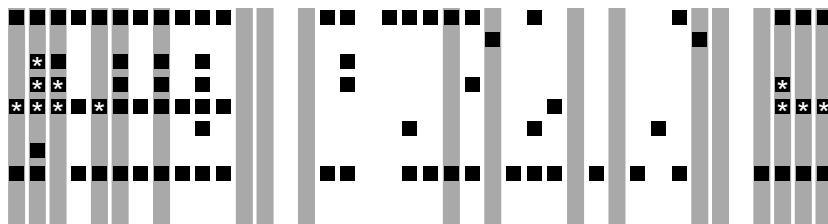

Supplement: S11 (10.1371/journal.pbio.2003467.s011) [file journal.pbio.2003467.s011]
